# Supplementary material for: Microglia aging in the hippocampus advances through intermediate states that drive activation and cognitive decline
Source: eLife. 2025 Apr 29;13:RP97671. doi: 10.7554/eLife.97671 (PMC12040317; doi:10.7554/eLife.97671)
Supplement: Supplementary file 1. — The tables contain genes selectively increased or decreased in each age group when compared to every other age group combined and genes differentially expressed between 6- and 12-, 18-, or 24-month microglia. The tables contain the average log fold change, the percentage of cells in each group with expression, and the adjusted p-value. [file elife-97671-supp1.xlsx]

## Sheet: Age Markers
p_val	avg_logFC	pct.1	pct.2	p_val_adj	cluster	gene
8.07067e-80	-0.388932	1	1	2.25963e-75	6mth	B2m
5.06747e-74	-0.439529	0.998	0.999	1.41879e-69	6mth	H2-D1
1.29094e-70	-1.03263	0.952	0.987	3.61437e-66	6mth	Lyz2
1.3569e-61	-0.36834	1	1	3.79904e-57	6mth	Fth1
3.91346e-60	-0.681522	0.722	0.907	1.09569e-55	6mth	Crlf2
5.95206e-52	-1.69518	0.967	0.994	1.66646e-47	6mth	Apoe
3.79979e-49	-0.46984	0.998	0.999	1.06386e-44	6mth	Cd9
3.40396e-48	-0.307727	0.998	0.999	9.53041e-44	6mth	Timp2
3.42592e-47	-0.586307	0.912	0.695	9.5919e-43	6mth	Ttr
3.26032e-42	-0.432023	0.991	0.998	9.12824e-38	6mth	Cd63
5.98962e-33	-0.387172	0.976	0.989	1.67697e-28	6mth	Il1a
7.21687e-32	-0.592166	0.656	0.822	2.02058e-27	6mth	Uba52
7.43645e-31	-0.337849	0.947	0.979	2.08206e-26	6mth	Rpl27
4.97851e-26	0.344538	0.949	0.859	1.39388e-21	6mth	Nav3
2.55682e-25	-0.496187	0.939	0.956	7.15859e-21	6mth	Cd52
2.93256e-25	-0.706498	0.211	0.455	8.21058e-21	6mth	Ildr2
5.10456e-25	-0.281895	0.958	0.975	1.42917e-20	6mth	Rpl15
8.47838e-25	-0.568606	0.551	0.717	2.37378e-20	6mth	AY036118
5.42952e-24	-0.445461	0.671	0.82	1.52016e-19	6mth	Rnaset2a
5.95985e-24	-0.456307	0.64	0.792	1.66864e-19	6mth	Rnaset2b
1.00462e-22	-0.542104	0.526	0.7	2.81275e-18	6mth	Gm26917
1.24545e-22	-0.330668	0.914	0.97	3.487e-18	6mth	Srgn
2.98091e-22	0.610946	0.186	0.05	8.34594e-18	6mth	Rgs7bp
2.80517e-21	-0.482035	0.89	0.949	7.8539e-17	6mth	Prdx1
5.94836e-21	0.264714	0.974	0.924	1.66542e-16	6mth	Nrip1
7.95816e-21	-0.263611	0.972	0.979	2.22813e-16	6mth	Tgfb1
9.78179e-21	-0.521024	0.64	0.778	2.7387e-16	6mth	Tnfaip2
1.12897e-20	0.268462	0.974	0.952	3.16089e-16	6mth	Nktr
2.37415e-20	-0.41139	0.96	0.975	6.64716e-16	6mth	Cd14
2.48785e-20	-0.785716	0.373	0.581	6.9655e-16	6mth	Il1b
3.22077e-20	-0.425154	0.98	0.991	9.0175e-16	6mth	Ccl3
3.10751e-19	0.253886	0.987	0.963	8.70041e-15	6mth	Hk2
3.18227e-19	-0.458804	0.993	0.999	8.90971e-15	6mth	Gm42418
4.16006e-19	0.273475	0.938	0.849	1.16473e-14	6mth	Col27a1
1.33218e-18	0.272488	0.976	0.926	3.72985e-14	6mth	Gm26532
3.55321e-18	0.254879	0.974	0.936	9.94828e-14	6mth	Adap2
1.48602e-17	-0.524026	0.46	0.634	4.16055e-13	6mth	Nr4a1
2.25417e-17	-0.416667	0.695	0.82	6.31123e-13	6mth	Cxcl16
4.12691e-17	0.259939	0.914	0.842	1.15545e-12	6mth	Map4k4
2.6461e-16	0.316346	0.866	0.74	7.40854e-12	6mth	Arid4a
2.82388e-16	-0.558439	0.373	0.56	7.9063e-12	6mth	Bcl2a1a
6.27646e-16	0.254807	0.96	0.898	1.75728e-11	6mth	Dock10
7.94888e-16	0.292214	0.864	0.789	2.22553e-11	6mth	Ktn1
1.39135e-15	0.310085	0.831	0.702	3.89549e-11	6mth	Arsb
1.61147e-15	-0.411992	0.114	0.281	4.51181e-11	6mth	Hbb-bs
1.94819e-15	-0.655293	0.169	0.351	5.45455e-11	6mth	Hcar2
2.08837e-15	0.31836	0.866	0.775	5.84702e-11	6mth	Zfp292
3.01396e-15	0.258216	0.956	0.92	8.43848e-11	6mth	Tmx4
9.67003e-15	-0.352369	0.778	0.851	2.70742e-10	6mth	C5ar1
1.04254e-14	-0.471005	0.489	0.668	2.91889e-10	6mth	Lgals3bp
1.04525e-14	-0.839221	0.092	0.245	2.92649e-10	6mth	Slc7a11
1.16756e-14	-0.708127	0.165	0.335	3.26893e-10	6mth	Ifi27l2a
1.39005e-14	-0.352948	0.638	0.755	3.89187e-10	6mth	Wdr89
1.42948e-14	-0.357806	0.621	0.757	4.00225e-10	6mth	Cd74
1.90951e-14	-0.524043	0.386	0.561	5.34625e-10	6mth	Anxa5
3.82251e-14	0.286592	0.869	0.771	1.07023e-09	6mth	Ddit3
6.27037e-14	-0.298833	0.928	0.956	1.75558e-09	6mth	Aldoa
6.42783e-14	0.269447	0.877	0.792	1.79966e-09	6mth	Itga6
6.49977e-14	-0.282141	0.807	0.878	1.81981e-09	6mth	Gltp
8.77265e-14	0.387504	0.588	0.43	2.45617e-09	6mth	Btaf1
1.47741e-13	-0.800166	0.186	0.342	4.13644e-09	6mth	Cst7
2.80754e-13	-0.496876	0.375	0.539	7.86054e-09	6mth	Csf1
3.39704e-13	-0.335278	0.993	0.994	9.51103e-09	6mth	Ccl4
5.2329e-13	0.303672	0.82	0.71	1.46511e-08	6mth	Acox3
9.66776e-13	0.363495	0.654	0.508	2.70678e-08	6mth	Rapgef5
1.23006e-12	0.335648	0.726	0.596	3.44393e-08	6mth	Hist1h1e
2.69337e-12	-0.691746	0.085	0.215	7.54089e-08	6mth	Axl
4.71948e-12	-0.94315	0.061	0.183	1.32136e-07	6mth	Lgals3
5.21356e-12	-1.247	0.013	0.108	1.45969e-07	6mth	Spp1
8.00145e-12	0.25636	0.881	0.83	2.24025e-07	6mth	Hes1
8.30975e-12	-0.523615	0.208	0.362	2.32656e-07	6mth	Plaur
1.07245e-11	-0.396417	0.456	0.613	3.00264e-07	6mth	Lsp1
1.19627e-11	-0.358055	0.548	0.67	3.34932e-07	6mth	Upk1b
1.5563e-11	-0.617487	0.248	0.396	4.35732e-07	6mth	Crip1
1.65294e-11	-0.251381	0.781	0.87	4.62791e-07	6mth	Shisa5
1.84737e-11	0.286597	0.77	0.67	5.17227e-07	6mth	Dhx9
1.99464e-11	-0.327989	0.48	0.642	5.5846e-07	6mth	Cox17
3.28337e-11	-0.303641	0.732	0.82	9.19278e-07	6mth	Nfkbid
4.72325e-11	0.326324	0.66	0.543	1.32242e-06	6mth	Cbfa2t3
1.23351e-10	-0.623301	0.336	0.471	3.45358e-06	6mth	Capg
1.31046e-10	-0.35711	0.561	0.686	3.66902e-06	6mth	Slfn2
1.63863e-10	-0.480865	0.022	0.113	4.58784e-06	6mth	Mageh1
1.95152e-10	-0.388593	0.375	0.517	5.46387e-06	6mth	Tmbim1
1.98118e-10	0.28637	0.642	0.523	5.5469e-06	6mth	Osbpl11
2.93118e-10	-0.300146	0.871	0.886	8.20673e-06	6mth	Gpr84
3.38355e-10	-0.867258	0.046	0.146	9.47328e-06	6mth	Cybb
4.59757e-10	-0.635034	0.092	0.208	1.28723e-05	6mth	Fxyd5
6.17275e-10	-0.294262	0.691	0.776	1.72825e-05	6mth	Bst2
7.10439e-10	0.27139	0.754	0.68	1.98909e-05	6mth	Csmd3
7.12249e-10	-0.342558	0.746	0.815	1.99416e-05	6mth	Cstb
8.27332e-10	-0.477869	0.193	0.325	2.31636e-05	6mth	Bcl2a1d
9.05269e-10	-0.415521	0.371	0.509	2.53457e-05	6mth	Cd48
9.54587e-10	0.316846	0.537	0.406	2.67265e-05	6mth	Klhdc8b
1.1022e-09	0.307489	0.621	0.486	3.08595e-05	6mth	Upf2
1.12582e-09	-0.452673	0.048	0.15	3.15206e-05	6mth	Kcnj12
1.51065e-09	-0.541555	0.151	0.276	4.22953e-05	6mth	Glipr1
2.19052e-09	0.362281	0.369	0.246	6.13301e-05	6mth	Adrb1
2.44035e-09	-0.420766	0.23	0.37	6.8325e-05	6mth	Naalad2
3.51222e-09	-0.501046	0.101	0.218	9.83352e-05	6mth	Ly9
3.70933e-09	-0.294699	0.686	0.786	0.000103854	6mth	Tspo
4.80153e-09	-0.474102	0.077	0.184	0.000134433	6mth	AI504432
6.37568e-09	-0.359202	0.355	0.495	0.000178506	6mth	Pde2a
7.01133e-09	-0.318159	0.456	0.575	0.000196303	6mth	Igsf6
7.3185e-09	0.25167	0.748	0.666	0.000204903	6mth	Pid1
1.12162e-08	0.258484	0.575	0.442	0.000314031	6mth	N4bp2l1
1.29063e-08	-0.254271	0.8	0.858	0.000361352	6mth	Tmsb10
1.7124e-08	-0.357961	0.259	0.394	0.000479438	6mth	H2-Q7
2.14598e-08	-0.313805	0.278	0.414	0.000600832	6mth	Gm10036
2.99055e-08	-0.266775	0.676	0.769	0.000837293	6mth	Rasgef1b
3.19611e-08	-0.335473	0.406	0.533	0.000894846	6mth	Smim3
3.49223e-08	-0.310639	0.612	0.705	0.000977753	6mth	Tpi1
3.52399e-08	-0.280097	0.737	0.809	0.000986647	6mth	Tlr2
3.76397e-08	0.2579	0.627	0.502	0.00105384	6mth	Arhgef6
4.27951e-08	-0.563556	0.055	0.145	0.00119818	6mth	Fam20c
4.52538e-08	0.257392	0.585	0.481	0.00126701	6mth	Ramp1
4.56556e-08	-0.401101	0.235	0.354	0.00127826	6mth	Mid1
5.46017e-08	-0.301386	0.463	0.595	0.00152874	6mth	Hebp1
5.95515e-08	0.318749	0.506	0.408	0.00166732	6mth	Nsun6
6.36595e-08	0.267034	0.676	0.586	0.00178234	6mth	Rapgef6
6.41767e-08	-0.295242	0.441	0.563	0.00179682	6mth	Txnrd1
6.88217e-08	0.260941	0.779	0.672	0.00192687	6mth	Chka
7.10383e-08	0.334565	0.395	0.275	0.00198893	6mth	Banp
7.44256e-08	0.30083	0.754	0.651	0.00208377	6mth	Rgs1
7.58432e-08	-0.46116	0.21	0.328	0.00212346	6mth	Clic4
8.12981e-08	-0.449443	0.099	0.201	0.00227618	6mth	Mir155hg
8.7368e-08	0.269683	0.553	0.431	0.00244613	6mth	Vav2
9.1657e-08	0.290149	0.438	0.318	0.00256621	6mth	Nos1ap
1.03898e-07	-0.493505	0.092	0.186	0.00290892	6mth	Hivep2
1.13754e-07	0.259414	0.654	0.57	0.00318489	6mth	Kif21b
1.21824e-07	0.263574	0.463	0.348	0.00341082	6mth	9930021J03Rik
1.26631e-07	-0.349567	0.496	0.608	0.00354541	6mth	Serpine1
1.6287e-07	0.346633	0.265	0.166	0.00456002	6mth	Myo18b
2.02029e-07	-0.264512	0.79	0.839	0.0056564	6mth	Mif
2.13495e-07	-0.388933	0.147	0.253	0.00597743	6mth	Gch1
2.45058e-07	-0.404349	0.114	0.217	0.00686113	6mth	Ifi204
2.59061e-07	-0.574257	0.195	0.306	0.0072532	6mth	Ifitm3
2.68875e-07	-0.305259	0.342	0.47	0.00752796	6mth	Rpl9-ps6
2.8804e-07	0.290735	0.461	0.352	0.00806454	6mth	Emsy
3.41448e-07	-0.338068	0.261	0.378	0.00955985	6mth	Zwint
3.47938e-07	-0.343264	0.261	0.376	0.00974158	6mth	H2-Q6
4.38386e-07	-0.404189	0.044	0.118	0.0122739	6mth	Bloc1s1
4.41518e-07	0.338665	0.138	0.068	0.0123616	6mth	Lmln
4.50445e-07	-0.428759	0.263	0.372	0.0126116	6mth	Vcam1
4.67855e-07	-0.474495	0.046	0.122	0.013099	6mth	Itgax
5.08184e-07	-0.354245	0.18	0.286	0.0142281	6mth	H2-Ab1
5.72236e-07	-0.465711	0.123	0.216	0.0160215	6mth	Hspa1b
6.18714e-07	-0.276063	0.631	0.722	0.0173228	6mth	Pgam1
6.24178e-07	0.27085	0.504	0.392	0.0174757	6mth	Zhx1
6.5231e-07	0.307642	0.344	0.239	0.0182634	6mth	Ide
1.06061e-06	-0.354034	0.103	0.195	0.0296949	6mth	Phf11b
1.06408e-06	0.253121	0.557	0.459	0.029792	6mth	Spen
1.26168e-06	0.318559	0.206	0.124	0.0353245	6mth	Ddit4
1.82224e-06	-0.380443	0.079	0.16	0.0510191	6mth	St8sia6
1.89281e-06	-0.289874	0.572	0.66	0.0529948	6mth	Arl5c
1.96948e-06	-0.475632	0.079	0.161	0.0551416	6mth	Cox6a2
1.97167e-06	0.291644	0.267	0.172	0.0552027	6mth	Naa16
2.3149e-06	-0.356666	0.274	0.377	0.0648126	6mth	Chst1
2.40831e-06	0.267578	0.445	0.341	0.067428	6mth	Luc7l
2.65373e-06	0.281709	0.487	0.382	0.0742991	6mth	Gadd45g
2.70763e-06	0.315845	0.318	0.227	0.0758083	6mth	Zfp715
3.22763e-06	-0.258112	0.465	0.584	0.090367	6mth	Ms4a6d
3.36557e-06	0.257154	0.461	0.352	0.0942292	6mth	Fam76b
3.7312e-06	0.252176	0.585	0.491	0.104466	6mth	Rreb1
3.74143e-06	0.277968	0.381	0.281	0.104753	6mth	Nr2c2
3.77144e-06	-0.33853	0.09	0.174	0.105593	6mth	Sp100
3.77243e-06	0.251433	0.485	0.39	0.10562	6mth	Arhgap27
3.79359e-06	0.313765	0.25	0.163	0.106213	6mth	Hif1an
3.85813e-06	0.295898	0.259	0.172	0.10802	6mth	Gtf3c4
4.66624e-06	-0.285588	0.292	0.401	0.130645	6mth	H2-T23
5.25309e-06	-0.387351	0.062	0.136	0.147076	6mth	Chst2
6.3282e-06	0.26143	0.574	0.503	0.177177	6mth	Fam193a
6.35295e-06	-0.690998	0.267	0.367	0.17787	6mth	Cxcl2
6.4998e-06	0.266211	0.419	0.328	0.181981	6mth	Mtmr10
6.62814e-06	-0.322858	0.134	0.225	0.185575	6mth	Mllt4
6.69814e-06	0.284343	0.362	0.265	0.187534	6mth	Nrf1
6.81737e-06	0.258434	0.346	0.25	0.190873	6mth	Tnks
6.88428e-06	0.276135	0.307	0.219	0.192746	6mth	Mdfi
9.27877e-06	-0.321245	0.351	0.447	0.259787	6mth	Emp3
9.47148e-06	-0.395637	0.044	0.108	0.265182	6mth	Pdcd1
1.07025e-05	-0.419662	0.092	0.172	0.299648	6mth	AI607873
1.26069e-05	-0.310597	0.287	0.384	0.352969	6mth	Tnfsf13b
1.30583e-05	-0.295441	0.125	0.212	0.365606	6mth	Snhg6
1.322e-05	-0.303404	0.121	0.209	0.370135	6mth	Gm12166
1.37108e-05	0.282857	0.243	0.162	0.383875	6mth	Ssh1
1.53255e-05	-0.263641	0.309	0.411	0.429083	6mth	Sdhd
1.68354e-05	0.280317	0.324	0.237	0.471358	6mth	Neurl1a
2.01275e-05	0.255967	0.438	0.346	0.56353	6mth	Bcl9l
2.03896e-05	-0.354664	0.116	0.197	0.570868	6mth	Cd274
2.18202e-05	0.268834	0.404	0.321	0.610923	6mth	Camta2
2.32028e-05	0.26325	0.327	0.242	0.649632	6mth	Ctns
2.37184e-05	0.275812	0.175	0.106	0.664068	6mth	Crls1
2.42017e-05	-0.516773	0.119	0.193	0.677599	6mth	Lilrb4a
2.47822e-05	-0.282874	0.329	0.425	0.693852	6mth	Naa20
2.79366e-05	-0.415238	0.075	0.144	0.782169	6mth	Cd72
2.82603e-05	-0.419825	0.081	0.151	0.791231	6mth	Wfdc17
2.88026e-05	-0.317086	0.149	0.233	0.806415	6mth	Ehd1
3.20109e-05	0.285227	0.208	0.136	0.896241	6mth	Fam193b
3.22995e-05	-0.318901	0.191	0.281	0.904321	6mth	AW112010
3.2524e-05	-0.306067	0.094	0.168	0.910606	6mth	Col6a3
3.84761e-05	0.293009	0.347	0.26	1	6mth	Ankrd26
4.50257e-05	0.263345	0.215	0.142	1	6mth	Nckipsd
5.24259e-05	-0.309347	0.055	0.116	1	6mth	Emp2
5.47624e-05	0.279637	0.276	0.195	1	6mth	Qser1
5.61754e-05	0.2654	0.381	0.293	1	6mth	Madd
6.59429e-05	0.261127	0.283	0.203	1	6mth	Git1
6.65422e-05	-0.32533	0.21	0.293	1	6mth	Ccl2
6.81179e-05	-0.302714	0.077	0.143	1	6mth	Rps18-ps3
6.8538e-05	0.271076	0.377	0.302	1	6mth	Jarid2
6.92651e-05	0.270905	0.206	0.136	1	6mth	Zfp30
6.95051e-05	-0.321646	0.105	0.178	1	6mth	Gpr65
8.2643e-05	-0.304159	0.127	0.203	1	6mth	Cacna1s
9.21742e-05	0.270711	0.169	0.106	1	6mth	Fbxo32
9.254e-05	-0.357205	0.061	0.12	1	6mth	Srxn1
9.26749e-05	-0.344553	0.186	0.263	1	6mth	Lmna
9.95273e-05	0.28395	0.219	0.15	1	6mth	Lig3
0.000104312	-0.264791	0.123	0.199	1	6mth	Tufm
0.000107466	-0.316291	0.114	0.184	1	6mth	Acot9
0.000114181	-0.295855	0.103	0.172	1	6mth	Rftn1
0.00013686	0.269057	0.14	0.084	1	6mth	Anks6
0.000159723	-0.292738	0.086	0.151	1	6mth	Cd22
0.000160027	0.253984	0.296	0.222	1	6mth	Itgb3
0.000162896	-0.262315	0.186	0.265	1	6mth	Erdr1
0.000177746	0.252185	0.301	0.228	1	6mth	Cramp1l
0.000181003	0.274355	0.233	0.164	1	6mth	Gpatch1
0.000185744	-0.287624	0.088	0.153	1	6mth	Lmnb1
0.0002425	-0.271828	0.055	0.11	1	6mth	Tmem205
0.000259438	-0.292682	0.062	0.118	1	6mth	Tob1
0.00027409	0.267973	0.184	0.124	1	6mth	Piga
0.000314493	-0.251389	0.241	0.325	1	6mth	Dusp5
0.000338824	-0.254212	0.059	0.113	1	6mth	Zc3h6
0.000366312	-0.275072	0.07	0.127	1	6mth	Ankrd33b
0.000372943	-0.603498	0.086	0.143	1	6mth	Vim
0.000380458	-0.259625	0.283	0.362	1	6mth	Tuba1c
0.000475293	-0.298063	0.057	0.108	1	6mth	Ptger4
0.000529212	0.251241	0.351	0.281	1	6mth	Tgfbrap1
0.000641196	-0.46114	0.114	0.173	1	6mth	Tnfsf9
0.0010096	0.2554	0.208	0.152	1	6mth	Sema4g
0.00110085	-0.25938	0.151	0.214	1	6mth	Fblim1
0.00123333	0.255687	0.153	0.103	1	6mth	Tmem129
0.00131161	-0.264323	0.268	0.33	1	6mth	Rilpl2
0.00136523	-0.276196	0.244	0.311	1	6mth	Dpp7
0.00177113	-0.28579	0.086	0.136	1	6mth	Fcgr4
0.0023277	-0.694822	0.072	0.116	1	6mth	Fabp5
0.00325981	-0.288638	0.768	0.783	1	6mth	Ccl6
0.00592681	-0.812158	0.121	0.168	1	6mth	Lpl
0.00862936	-0.288674	0.075	0.117	1	6mth	Ccl5
7.87909e-119	0.948084	0.967	0.719	2.20599e-114	12mth	Uba52
6.26898e-105	0.931132	0.93	0.592	1.75519e-100	12mth	AY036118
3.08758e-85	0.874913	0.9	0.577	8.6446e-81	12mth	Gm26917
7.6085e-72	0.479017	0.998	0.971	2.13023e-67	12mth	Tgfb1
6.4141e-52	1.02791	0.374	0.094	1.79582e-47	12mth	Hivep2
1.0676e-51	0.754945	0.922	0.749	2.98907e-47	12mth	Hspa1a
2.5196e-48	0.392984	0.998	0.982	7.05436e-44	12mth	Gm10076
5.45392e-45	0.379237	0.994	0.963	1.52699e-40	12mth	Rpl27
1.97013e-42	0.580614	0.973	0.92	5.51596e-38	12mth	Dnajb1
1.54192e-41	2.05352	0.914	0.702	4.31706e-37	12mth	Ttr
6.32748e-40	0.258985	0.998	0.998	1.77157e-35	12mth	Zfp36
1.02616e-36	0.429725	0.953	0.86	2.87304e-32	12mth	Gm10073
8.97169e-36	0.475279	0.916	0.809	2.51189e-31	12mth	Ythdc1
1.82907e-34	0.319796	0.986	0.965	5.12103e-30	12mth	Rpl15
1.12757e-33	0.745605	0.442	0.182	3.15696e-29	12mth	Erdr1
6.62523e-33	0.281921	0.998	0.987	1.85493e-28	12mth	Fosb
1.74727e-31	0.31042	0.988	0.965	4.892e-27	12mth	Sft2d1
5.31173e-31	0.631573	0.618	0.36	1.48718e-26	12mth	Tnrc6c
1.90137e-21	0.606896	0.219	0.068	5.32345e-17	12mth	Gm26825
1.81345e-20	0.374447	0.857	0.718	5.07729e-16	12mth	Rnaset2b
9.68093e-20	0.67833	0.325	0.149	2.71047e-15	12mth	Hspa1b
3.99181e-18	0.303774	0.937	0.85	1.11763e-13	12mth	mt-Atp8
1.53816e-17	0.447278	0.104	0.019	4.30655e-13	12mth	Gm11175
3.5934e-17	0.329953	0.871	0.752	1.00608e-12	12mth	Rnaset2a
4.02707e-16	0.311663	0.814	0.684	1.1275e-11	12mth	Adap2os
1.39205e-15	0.290645	0.99	0.979	3.89747e-11	12mth	Dnaja1
7.58334e-15	0.369545	0.726	0.559	2.12318e-10	12mth	Cox17
5.52113e-14	0.290192	0.847	0.775	1.54581e-09	12mth	Ost4
6.6255e-14	-0.591976	0.973	0.979	1.85501e-09	12mth	Lyz2
1.24668e-13	0.33201	0.808	0.696	3.49047e-09	12mth	Rps27rt
2.28793e-13	0.436128	0.431	0.269	6.40574e-09	12mth	Paxbp1
3.91665e-13	0.269311	0.91	0.837	1.09658e-08	12mth	Rpl23a-ps3
5.04935e-13	0.444389	0.211	0.09	1.41372e-08	12mth	Spock2
6.88741e-13	0.300884	0.828	0.691	1.92834e-08	12mth	Wdr89
8.10201e-13	0.288178	0.836	0.722	2.2684e-08	12mth	Snrpg
1.69197e-12	0.397992	0.123	0.037	4.73717e-08	12mth	Gm20721
3.89898e-12	0.370437	0.603	0.442	1.09164e-07	12mth	Grcc10
3.9392e-12	-0.889337	0.174	0.326	1.1029e-07	12mth	Ifi27l2a
6.26536e-12	0.253232	0.92	0.852	1.75418e-07	12mth	Arpc4
1.35868e-11	0.258662	0.84	0.733	3.80402e-07	12mth	Yy1
9.32342e-11	-0.716653	0.188	0.336	2.61037e-06	12mth	Cst7
1.22416e-10	0.270897	0.769	0.667	3.4274e-06	12mth	Snrpf
2.11919e-10	0.407504	0.431	0.288	5.9333e-06	12mth	Mid1
5.38907e-10	-0.268879	0.83	0.867	1.50883e-05	12mth	Crlf2
5.65463e-10	0.318441	0.585	0.452	1.58318e-05	12mth	Rnf5
6.516e-10	0.38716	0.28	0.156	1.82435e-05	12mth	Gm12166
9.25756e-10	0.305383	0.339	0.205	2.59193e-05	12mth	Hbb-bs
2.38729e-09	0.343297	0.415	0.273	6.68395e-05	12mth	Amd1
2.73709e-09	0.299314	0.669	0.559	7.66331e-05	12mth	Nfya
4.76584e-09	0.261785	0.714	0.606	0.000133434	12mth	Kpna4
6.87048e-09	0.287534	0.613	0.464	0.00019236	12mth	Ldb1
1.11084e-08	0.374121	0.17	0.08	0.000311013	12mth	Atp6v0c
2.20151e-08	0.345913	0.276	0.162	0.000616379	12mth	Snhg6
3.18572e-08	0.365333	0.164	0.078	0.000891937	12mth	Bloc1s1
5.05129e-08	0.347617	0.573	0.453	0.00141426	12mth	Otulin
8.57642e-08	0.349641	0.147	0.069	0.00240123	12mth	Junos
2.96367e-07	0.337333	0.143	0.068	0.00829767	12mth	B3gnt2
3.21442e-07	0.315453	0.288	0.182	0.00899973	12mth	Cdyl
3.42337e-07	-0.254851	0.562	0.646	0.00958475	12mth	AU020206
3.49703e-07	-0.282353	0.581	0.675	0.00979098	12mth	Slfn2
3.53141e-07	-0.262503	0.654	0.736	0.00988723	12mth	Rnf149
3.89247e-07	0.325739	0.374	0.253	0.0108981	12mth	Aldoc
4.58284e-07	-0.514463	0.112	0.214	0.012831	12mth	Ifi204
4.82044e-07	-1.04483	0.992	0.985	0.0134963	12mth	Apoe
5.31267e-07	0.286935	0.401	0.285	0.0148744	12mth	Rgmb
6.22317e-07	0.283435	0.37	0.255	0.0174236	12mth	Gm561
6.76222e-07	0.346856	0.288	0.192	0.0189329	12mth	Nckap5l
6.98902e-07	0.275361	0.472	0.356	0.0195679	12mth	Sdhd
8.44017e-07	-0.648255	0.198	0.301	0.0236308	12mth	Ifitm3
8.61211e-07	0.287489	0.532	0.406	0.0241122	12mth	Rpl9-ps6
1.54235e-06	-0.257178	0.777	0.847	0.0431828	12mth	Ccl12
1.6745e-06	0.359399	0.168	0.092	0.0468828	12mth	Pltp
2.58448e-06	0.310039	0.247	0.155	0.0723602	12mth	Piezo1
2.75432e-06	-0.255834	0.941	0.955	0.0771154	12mth	Cd52
3.83558e-06	0.303421	0.106	0.049	0.107389	12mth	Cxcl12
5.28748e-06	1.3928	0.112	0.053	0.148039	12mth	Enpp2
5.98969e-06	0.25859	0.472	0.362	0.167699	12mth	Mthfs
6.35945e-06	0.295431	0.247	0.158	0.178052	12mth	Atn1.1
6.66002e-06	-0.365057	0.063	0.141	0.186467	12mth	Fcgr4
7.22084e-06	-0.437703	0.061	0.138	0.202169	12mth	Cybb
8.66515e-06	-0.680563	0.051	0.121	0.242607	12mth	Fabp5
9.15431e-06	0.27121	0.229	0.144	0.256302	12mth	Gm8797
9.57885e-06	-0.428634	0.09	0.17	0.268189	12mth	AI607873
1.05781e-05	0.254402	0.489	0.381	0.296166	12mth	Hsph1
1.16089e-05	-0.816303	0.096	0.174	0.325025	12mth	Lpl
1.35654e-05	0.272748	0.108	0.052	0.379804	12mth	Abhd2
1.56319e-05	0.299183	0.215	0.133	0.437662	12mth	Snhg9
1.57117e-05	0.264904	0.382	0.28	0.439896	12mth	Hk3
1.75925e-05	0.296818	0.382	0.293	0.492556	12mth	Kcnk12
1.83889e-05	-0.891904	0.09	0.169	0.514851	12mth	Lgals3
2.28637e-05	-0.345794	0.235	0.324	0.640139	12mth	Hcar2
2.62067e-05	-0.284309	0.337	0.439	0.733735	12mth	Gcnt2
2.71622e-05	0.298292	0.147	0.082	0.760487	12mth	Rgs5
3.13431e-05	0.284292	0.346	0.247	0.877543	12mth	Ccl2
3.2193e-05	-0.467403	0.072	0.143	0.901339	12mth	Cd72
3.29107e-05	0.265764	0.106	0.053	0.921435	12mth	S100b
3.63901e-05	-0.304096	0.589	0.63	1	12mth	Lgals3bp
3.6617e-05	-0.382367	0.07	0.139	1	12mth	Rtp4
3.71783e-05	0.278902	0.305	0.216	1	12mth	Kctd13
3.9846e-05	0.274516	0.325	0.233	1	12mth	Phpt1
4.24735e-05	0.273979	0.141	0.079	1	12mth	3110056K07Rik
5.66747e-05	0.286543	0.26	0.18	1	12mth	Senp3
6.3858e-05	-0.28511	0.227	0.319	1	12mth	Ing4
9.17915e-05	0.298444	0.319	0.23	1	12mth	Mt3
9.57241e-05	0.286934	0.272	0.19	1	12mth	Hspb1
9.71326e-05	0.293396	0.321	0.232	1	12mth	Leng9
0.000103237	0.257831	0.147	0.087	1	12mth	Dagla
0.000114953	0.255215	0.198	0.131	1	12mth	Ogg1
0.000126009	-0.302505	0.299	0.375	1	12mth	Plin2
0.000130452	0.263368	0.274	0.192	1	12mth	Gm26778
0.000143398	-0.303346	0.11	0.182	1	12mth	Acot9
0.000150574	0.268355	0.121	0.069	1	12mth	Ulk3
0.000150849	0.380592	0.217	0.147	1	12mth	Clu
0.000155463	0.290629	0.127	0.072	1	12mth	Ptn
0.000200021	0.258543	0.145	0.088	1	12mth	Gm10382
0.00020905	0.285418	0.241	0.169	1	12mth	Cpe
0.000210306	0.251233	0.331	0.242	1	12mth	Lrp5
0.000273107	-0.427918	0.076	0.135	1	12mth	Fam20c
0.000276112	-0.297303	0.223	0.296	1	12mth	Adrb1
0.000320456	-0.369673	0.129	0.197	1	12mth	Axl
0.000381332	0.264148	0.2	0.137	1	12mth	Sparcl1
0.000601754	-0.305651	0.088	0.146	1	12mth	Wfdc17
0.00066503	-0.454339	0.476	0.541	1	12mth	Il1b
0.00067574	-0.396415	0.125	0.189	1	12mth	Lilrb4a
0.000726965	-0.286898	0.162	0.226	1	12mth	Ehd1
0.000791425	0.262969	0.209	0.146	1	12mth	Cldn5
0.00111943	0.25404	0.207	0.148	1	12mth	Smim4
0.00228371	-0.264741	0.186	0.248	1	12mth	Mthfd2
0.00262794	-0.253396	0.225	0.279	1	12mth	Mmp14
0.00332375	0.359703	0.348	0.287	1	12mth	Exosc2
0.00338854	-0.253001	0.1	0.151	1	12mth	Cox6a2
0.00377557	-0.265114	0.094	0.144	1	12mth	Nceh1
0.00432164	-0.523397	0.072	0.117	1	12mth	Ccl5
0.00482654	-0.454245	0.092	0.139	1	12mth	Vim
0.00604459	-0.340318	0.164	0.217	1	12mth	Slc7a11
0.00853932	-0.275677	0.198	0.25	1	12mth	Adssl1
1.7479e-168	-0.942301	0.952	0.997	4.89376e-164	18mth	Gm10076
7.80262e-72	-0.319835	1	1	2.18458e-67	18mth	Rpl35
1.95821e-32	0.648055	0.424	0.173	5.48258e-28	18mth	Hbb-bs
1.28337e-31	-0.554854	0.578	0.781	3.59317e-27	18mth	Gm10116
1.58118e-31	-0.600604	0.67	0.815	4.427e-27	18mth	Uba52
2.72065e-27	0.309068	0.994	0.979	7.61729e-23	18mth	Cebpb
3.5533e-22	0.347889	0.854	0.716	9.94852e-18	18mth	Rnaset2b
1.41431e-21	-0.353924	0.818	0.904	3.95977e-17	18mth	Gm10073
4.12371e-21	0.261446	0.998	0.999	1.15456e-16	18mth	Cd9
4.87522e-21	0.273827	0.979	0.946	1.36496e-16	18mth	Pdia6
1.58978e-20	0.278095	0.998	0.94	4.45107e-16	18mth	Srgn
3.05077e-20	0.353743	0.9	0.808	8.54154e-16	18mth	C5ar1
1.06394e-19	0.33797	0.881	0.747	2.97882e-15	18mth	Rnaset2a
2.79624e-19	0.29051	0.933	0.832	7.8289e-15	18mth	Crlf2
1.74931e-18	0.605251	0.165	0.048	4.89773e-14	18mth	S100a8
2.44396e-16	0.505527	0.132	0.034	6.84261e-12	18mth	S100a9
7.23144e-16	0.30237	1	0.997	2.02466e-11	18mth	Gm42418
8.48764e-15	0.254797	0.967	0.906	2.37637e-10	18mth	Sdf2l1
1.64154e-14	-0.583458	0.107	0.27	4.59599e-10	18mth	Gm10020
2.10258e-13	0.256692	0.983	0.967	5.8868e-09	18mth	Cd14
2.59022e-13	-1.32989	0.72	0.764	7.25211e-09	18mth	Ttr
5.54075e-12	-0.552892	0.054	0.178	1.5513e-07	18mth	Gstp1
5.64402e-11	0.255693	0.787	0.702	1.58021e-06	18mth	Wdr89
4.28087e-10	0.374937	0.152	0.064	1.19856e-05	18mth	Hba-a1
1.41119e-09	0.39099	0.653	0.553	3.95106e-05	18mth	Serpine1
4.04797e-09	0.385786	0.432	0.31	0.000113335	18mth	Tuba1c
4.60452e-09	-0.419777	0.188	0.323	0.000128917	18mth	Lrch4
6.88221e-09	0.315144	0.493	0.355	0.000192688	18mth	Ildr2
8.066e-09	-0.336516	0.369	0.498	0.000225832	18mth	Prkca
1.13146e-08	0.372326	0.395	0.271	0.000316787	18mth	Hcar2
6.58371e-08	-0.293118	0.447	0.558	0.00184331	18mth	Cirbp
1.13445e-06	-0.463933	0.111	0.204	0.0317623	18mth	Gm26802
2.1597e-06	0.277835	0.257	0.165	0.0604673	18mth	Dolk
2.41273e-06	-0.352079	0.05	0.124	0.0675515	18mth	Slc15a2
3.00127e-06	0.263753	0.436	0.33	0.0840295	18mth	Crip1
3.56749e-06	-0.43326	0.098	0.182	0.0998825	18mth	Hivep2
5.47221e-06	-0.261532	0.468	0.574	0.153211	18mth	Rapgef5
9.18045e-06	0.325521	0.188	0.112	0.257034	18mth	1810011O10Rik
1.08731e-05	0.301333	0.121	0.062	0.304426	18mth	Arhgap15
1.18349e-05	-0.295556	0.353	0.457	0.331353	18mth	Sbno2
1.28481e-05	-0.365242	0.04	0.102	0.35972	18mth	Rgs7bp
2.40905e-05	-0.274374	0.215	0.311	0.674485	18mth	Scd2
2.47276e-05	-0.347979	0.109	0.187	0.692322	18mth	Usp50
2.90989e-05	0.321268	0.211	0.137	0.81471	18mth	AI504432
4.49005e-05	-0.298846	0.061	0.126	1	18mth	Gm10269
4.77586e-05	-0.272645	0.369	0.466	1	18mth	Rpl10-ps3
4.86943e-05	0.290586	0.472	0.384	1	18mth	Dhx40
5.31501e-05	-0.297189	0.173	0.255	1	18mth	Fam13b
7.17777e-05	0.275921	0.182	0.115	1	18mth	Wfdc17
9.47486e-05	0.264645	0.171	0.106	1	18mth	Fcgr4
0.000123529	-0.292279	0.107	0.179	1	18mth	Cldn5
0.000168752	0.284144	0.219	0.149	1	18mth	St14
0.000224754	-0.266282	0.081	0.143	1	18mth	Ccdc85b
0.000259296	0.328037	0.294	0.225	1	18mth	Lmna
0.000345005	0.25866	0.144	0.09	1	18mth	Cd80
0.000429407	0.33233	0.276	0.21	1	18mth	Baiap2
0.000494054	-0.305949	0.104	0.165	1	18mth	Vtn
0.000596355	0.255088	0.232	0.166	1	18mth	Cacna1s
0.000810559	-0.277488	0.138	0.202	1	18mth	Cpe
0.00127708	-0.300843	0.058	0.104	1	18mth	Fam71a
0.00130061	-0.258269	0.194	0.261	1	18mth	Erdr1
0.00181608	0.26732	0.152	0.104	1	18mth	Chst2
0.0022202	0.261927	0.148	0.1	1	18mth	Ankrd33b
0.00389383	0.26538	0.215	0.164	1	18mth	Fxyd5
0.00428361	-0.254423	0.125	0.177	1	18mth	Clu
0.00694256	-0.3381	0.155	0.208	1	18mth	Gm13889
0.00893493	0.328848	0.186	0.139	1	18mth	AI607873
4.94606e-97	-2.03299	0.451	0.848	1.3848e-92	24mth	Ttr
7.64334e-72	1.39892	1	0.983	2.13998e-67	24mth	Apoe
2.05183e-61	-1.06907	0.585	0.855	5.74471e-57	24mth	Hspa1a
4.63572e-61	0.985937	0.996	0.972	1.29791e-56	24mth	Lyz2
3.24482e-52	0.367911	1	1	9.08484e-48	24mth	Fth1
2.62258e-50	-0.259478	1	1	7.3427e-46	24mth	Jun
2.75353e-48	0.303779	1	1	7.70934e-44	24mth	B2m
8.0205e-48	0.252145	1	1	2.24558e-43	24mth	Rpl35
4.90627e-46	0.359446	1	0.981	1.37366e-41	24mth	Gm10076
4.47395e-45	-0.387635	0.974	0.994	1.25262e-40	24mth	Fosb
3.96109e-44	0.476895	0.955	0.827	1.10903e-39	24mth	Crlf2
1.96658e-43	-0.529842	0.939	0.987	5.50603e-39	24mth	Klf4
1.59396e-40	-0.623419	0.864	0.955	4.46278e-36	24mth	Dnajb1
1.40357e-39	0.949507	0.512	0.219	3.92972e-35	24mth	Ifi27l2a
6.2361e-39	-0.303031	1	1	1.74598e-34	24mth	Hspa5
3.27622e-37	0.416242	0.998	0.995	9.17277e-33	24mth	Cd63
1.25654e-36	-0.453554	0.968	0.986	3.51806e-32	24mth	Dnaja1
1.44967e-34	-0.481669	0.761	0.905	4.05878e-30	24mth	mt-Atp8
4.08888e-34	-0.360893	0.992	0.999	1.14481e-29	24mth	Klf2
7.70092e-34	0.256206	1	0.999	2.1561e-29	24mth	Timp2
9.01242e-29	0.904912	0.488	0.241	2.5233e-24	24mth	Cst7
1.01845e-28	-0.285662	0.998	1	2.85146e-24	24mth	Klf6
1.7683e-26	0.460767	0.968	0.947	4.9509e-22	24mth	Cd52
2.07213e-26	1.37896	0.296	0.104	5.80154e-22	24mth	Lgals3
5.86499e-26	1.92232	0.196	0.047	1.64208e-21	24mth	Spp1
1.93615e-25	-0.356321	0.86	0.95	5.42084e-21	24mth	Tsc22d3
1.93982e-25	-0.312909	0.992	0.995	5.4311e-21	24mth	Hsp90aa1
4.09774e-25	-0.445297	0.733	0.867	1.14729e-20	24mth	Ythdc1
5.32855e-25	-0.253388	0.982	0.999	1.49189e-20	24mth	Jmjd1c
1.55529e-24	-0.306275	0.953	0.976	4.35449e-20	24mth	Sft2d1
2.62959e-23	-0.91073	0.073	0.289	7.36233e-19	24mth	Hbb-bs
3.26827e-22	-0.46869	0.587	0.755	9.1505e-18	24mth	Adap2os
9.51724e-22	0.669774	0.431	0.227	2.66464e-17	24mth	Ifitm3
3.06059e-21	1.00435	0.237	0.082	8.56904e-17	24mth	Cybb
5.1527e-21	0.413104	0.836	0.695	1.44265e-16	24mth	Gm10116
2.83683e-20	0.497669	0.672	0.459	7.94257e-16	24mth	Bcl2a1a
2.92792e-20	-0.332666	0.868	0.934	8.19759e-16	24mth	Tnpo3
3.68577e-20	0.375773	0.879	0.757	1.03194e-15	24mth	Cxcl16
3.83548e-20	0.582355	0.16	0.04	1.07386e-15	24mth	Rxrg
3.8686e-20	0.831444	0.346	0.16	1.08313e-15	24mth	Slc7a11
6.71595e-20	0.379409	0.85	0.742	1.88033e-15	24mth	Ifi27
7.99401e-20	0.804864	0.674	0.479	2.23816e-15	24mth	Il1b
1.56815e-19	-0.278668	0.901	0.96	4.39051e-15	24mth	Nmt1
2.04542e-19	0.497736	0.751	0.579	5.72677e-15	24mth	Lgals3bp
8.01038e-19	-0.347389	0.889	0.943	2.24275e-14	24mth	Tmx4
8.77226e-19	-0.494272	0.567	0.707	2.45606e-14	24mth	AY036118
9.84326e-19	0.383322	0.842	0.725	2.75591e-14	24mth	Bst2
1.39172e-18	-0.31279	0.889	0.956	3.89652e-14	24mth	Gm26532
1.54478e-18	0.404495	0.917	0.871	4.32509e-14	24mth	Gpr84
2.16084e-18	0.722022	0.306	0.141	6.04991e-14	24mth	Axl
3.99603e-18	-0.407712	0.662	0.78	1.11881e-13	24mth	Rnaset2b
1.1534e-17	0.398075	0.832	0.712	3.22928e-13	24mth	Tnfaip2
2.35931e-17	-0.260793	0.939	0.975	6.60559e-13	24mth	Hpgd
5.26534e-17	0.580115	0.103	0.019	1.47419e-12	24mth	Pianp
6.19098e-17	1.08426	0.202	0.073	1.73335e-12	24mth	Fabp5
1.00686e-16	0.326418	0.996	0.985	2.819e-12	24mth	Ccl3
1.10544e-16	0.333418	1	0.992	3.095e-12	24mth	Ccl4
2.33824e-16	-0.736993	0.067	0.231	6.54661e-12	24mth	Hspa1b
3.38672e-16	0.324687	0.872	0.773	9.48213e-12	24mth	Nfkbid
6.30879e-16	0.616658	0.314	0.151	1.76634e-11	24mth	Ifi204
1.42066e-15	0.629831	0.16	0.051	3.97757e-11	24mth	Rab7b
5.44584e-15	0.543545	0.953	0.927	1.52473e-10	24mth	Prdx1
5.57987e-15	0.375883	0.757	0.619	1.56225e-10	24mth	Slfn2
9.6757e-15	0.501003	0.421	0.248	2.709e-10	24mth	Bcl2a1d
1.44693e-14	-0.280788	0.81	0.893	4.0511e-10	24mth	Col27a1
2.63514e-14	0.398499	0.684	0.521	7.37785e-10	24mth	Hebp1
2.77922e-14	1.21424	0.259	0.123	7.78127e-10	24mth	Lpl
4.35639e-14	0.252633	1	0.999	1.2197e-09	24mth	Cd9
9.7461e-14	0.393084	0.524	0.347	2.72871e-09	24mth	Ildr2
4.38865e-13	-0.295466	0.68	0.784	1.22873e-08	24mth	Yy1
5.4634e-13	-0.33971	0.706	0.804	1.52964e-08	24mth	Rnaset2a
1.76848e-12	0.475101	0.296	0.153	4.95139e-08	24mth	Ly9
2.0023e-12	-0.256085	0.832	0.905	5.60603e-08	24mth	Bcl10
2.41763e-12	0.405169	0.168	0.064	6.76887e-08	24mth	Mageh1
3.04652e-12	0.4899	0.615	0.483	8.52966e-08	24mth	Anxa5
3.50252e-12	0.484185	0.233	0.109	9.80636e-08	24mth	Cox6a2
5.04256e-12	-0.452578	0.285	0.445	1.41182e-07	24mth	Hsph1
9.35682e-12	0.4804	0.211	0.094	2.61972e-07	24mth	Rtp4
1.6415e-11	0.632371	0.211	0.099	4.59587e-07	24mth	Cd72
2.60537e-11	0.440486	0.121	0.04	7.29452e-07	24mth	Anxa2
3.29554e-11	-0.289121	0.658	0.773	9.22685e-07	24mth	Nuak1
3.85858e-11	0.433681	0.419	0.266	1.08032e-06	24mth	Hcar2
4.57651e-11	-0.400317	0.32	0.479	1.28133e-06	24mth	Klhdc8b
6.55876e-11	0.633952	0.202	0.095	1.83632e-06	24mth	Fam20c
9.67139e-11	0.472452	0.457	0.306	2.7078e-06	24mth	Vcam1
1.41043e-10	0.430779	0.241	0.124	3.94892e-06	24mth	Sp100
1.42001e-10	0.33248	0.885	0.808	3.97575e-06	24mth	Mif
1.4698e-10	0.577486	0.176	0.079	4.11515e-06	24mth	Itgax
1.98146e-10	-0.265785	0.755	0.837	5.54769e-06	24mth	Cggbp1
1.98897e-10	0.647758	0.263	0.145	5.56873e-06	24mth	Lilrb4a
2.20775e-10	0.417479	0.2	0.094	6.18125e-06	24mth	Serpinb6a
2.27232e-10	0.680804	0.136	0.053	6.36203e-06	24mth	Cxcl14
3.04434e-10	0.318742	0.753	0.618	8.52355e-06	24mth	Csf2ra
3.08486e-10	0.376975	0.239	0.123	8.63699e-06	24mth	AI607873
3.09187e-10	0.430917	0.168	0.072	8.65662e-06	24mth	Tmem205
4.06062e-10	-0.337515	0.411	0.557	1.13689e-05	24mth	Upf2
4.22422e-10	0.294823	0.887	0.812	1.1827e-05	24mth	Ccl12
5.13861e-10	-0.322195	0.48	0.618	1.43871e-05	24mth	Nfya
5.63963e-10	-0.365525	0.585	0.676	1.57898e-05	24mth	Gm26917
9.19078e-10	0.378823	0.115	0.041	2.57323e-05	24mth	Cyp4f18
1.05115e-09	0.420613	0.19	0.091	2.943e-05	24mth	Fgr
1.22827e-09	0.257421	0.83	0.718	3.43891e-05	24mth	Rasgef1b
1.27935e-09	0.2838	0.929	0.891	3.58193e-05	24mth	Id2
1.29098e-09	0.474766	0.211	0.107	3.61449e-05	24mth	Nceh1
2.40602e-09	0.414714	0.3	0.183	6.73637e-05	24mth	Ehd1
3.05281e-09	-0.318274	0.516	0.638	8.54727e-05	24mth	Mxd4
3.72151e-09	0.383447	0.324	0.199	0.000104195	24mth	Gm10020
3.74872e-09	-0.250182	0.678	0.784	0.000104957	24mth	Snta1
4.07451e-09	-0.278976	0.648	0.748	0.000114078	24mth	Wdr89
5.2219e-09	0.915578	0.2	0.105	0.000146203	24mth	Vim
6.6917e-09	0.641428	0.534	0.404	0.000187354	24mth	Capg
8.34061e-09	-0.260691	0.682	0.768	0.00023352	24mth	Dnajb4
9.10928e-09	0.295365	0.658	0.519	0.000255042	24mth	Ms4a6d
1.3216e-08	0.307419	0.63	0.486	0.000370021	24mth	Slamf9
1.56984e-08	0.254122	0.828	0.737	0.000439524	24mth	Tspo
1.89259e-08	0.384424	0.225	0.124	0.000529887	24mth	Col6a3
2.34231e-08	0.345326	0.443	0.315	0.0006558	24mth	Ms4a6c
2.41765e-08	0.405085	0.154	0.071	0.000676894	24mth	Pdcd1
3.08989e-08	0.364029	0.172	0.084	0.000865107	24mth	Slc15a2
4.03578e-08	-0.327098	0.409	0.529	0.00112994	24mth	Ldb1
4.07645e-08	-0.440925	0.038	0.125	0.00114132	24mth	Gm26825
4.18241e-08	0.318205	0.455	0.328	0.00117099	24mth	H2-Q7
4.78093e-08	-0.251743	0.82	0.851	0.00133856	24mth	Hes1
5.34651e-08	-0.255218	0.664	0.769	0.00149691	24mth	Arid5a
6.62264e-08	0.263893	0.941	0.951	0.00185421	24mth	Aldoa
8.75893e-08	0.420419	0.332	0.214	0.00245233	24mth	Glipr1
9.07136e-08	-0.252186	0.555	0.649	0.0025398	24mth	Gtpbp2
1.10456e-07	-0.282414	0.543	0.654	0.00309256	24mth	Frg1
1.65522e-07	-0.411833	0.231	0.341	0.00463429	24mth	Kcnk12
1.68348e-07	0.364981	0.383	0.269	0.00471341	24mth	Clic4
1.79636e-07	0.336982	0.571	0.471	0.00502945	24mth	Csf1
1.90135e-07	-0.354404	0.19	0.311	0.0053234	24mth	Aldoc
2.15145e-07	0.460658	0.253	0.153	0.00602364	24mth	Fxyd5
2.48189e-07	0.376712	0.113	0.048	0.00694879	24mth	Gm1673
2.66636e-07	-0.251486	0.506	0.635	0.00746528	24mth	BC017643
2.91602e-07	-0.332591	0.33	0.451	0.00816428	24mth	Tnrc6c
3.09181e-07	-0.426707	0.077	0.167	0.00865645	24mth	Ddit4
3.27042e-07	0.325536	0.259	0.157	0.00915653	24mth	Epb41l3
3.96913e-07	0.454428	0.109	0.047	0.0111128	24mth	Pla2g7
4.29731e-07	0.334366	0.279	0.176	0.0120316	24mth	Mllt4
4.62664e-07	-0.391928	0.03	0.104	0.0129537	24mth	Rgs7bp
5.22129e-07	0.339512	0.316	0.215	0.0146186	24mth	Rnf213
8.66954e-07	-0.261754	0.472	0.577	0.024273	24mth	B4galt3
9.70072e-07	-0.433847	0.091	0.183	0.0271601	24mth	Hivep2
1.02819e-06	-0.399287	0.166	0.269	0.0287874	24mth	Erdr1
1.52671e-06	-0.267632	0.439	0.56	0.0427448	24mth	Ptpro
1.71406e-06	0.302034	0.427	0.319	0.0479903	24mth	H2-Q6
1.86774e-06	0.372001	0.241	0.149	0.0522929	24mth	Phf11b
1.88085e-06	0.336622	0.243	0.152	0.0526599	24mth	Mir155hg
2.23277e-06	0.366132	0.82	0.766	0.0625131	24mth	Ccl6
2.36769e-06	0.356901	0.231	0.144	0.0662906	24mth	Acot9
2.39383e-06	0.309125	0.132	0.065	0.0670225	24mth	AB124611
2.45075e-06	0.320104	0.32	0.221	0.068616	24mth	Chst12
2.77825e-06	-0.352327	0.186	0.284	0.0777855	24mth	Neurl1a
2.81546e-06	-0.273721	0.356	0.47	0.0788273	24mth	Rhobtb1
3.19479e-06	-0.307419	0.381	0.468	0.0894478	24mth	Dusp7
3.31082e-06	-0.262765	0.403	0.508	0.0926964	24mth	Cbx3
3.4564e-06	-0.260297	0.403	0.513	0.0967724	24mth	Batf3
3.59929e-06	0.341533	0.33	0.234	0.100773	24mth	AW112010
4.87599e-06	-0.413925	0.036	0.102	0.136518	24mth	Hba-a1
5.14065e-06	0.295402	0.13	0.065	0.143928	24mth	Irf7
5.42329e-06	-0.29896	0.227	0.333	0.151841	24mth	Mgme1
6.72772e-06	0.287784	0.154	0.084	0.188363	24mth	Eya4
6.99101e-06	-0.318562	0.231	0.333	0.195734	24mth	Paxbp1
7.03581e-06	0.459264	0.223	0.144	0.196989	24mth	Vat1
7.0834e-06	-0.289956	0.227	0.332	0.198321	24mth	Amd1
8.81263e-06	0.3129	0.583	0.508	0.246736	24mth	Osm
8.95169e-06	-0.299522	0.233	0.331	0.250629	24mth	Banp
9.49094e-06	-0.320333	0.17	0.265	0.265727	24mth	Jrkl
9.83467e-06	-0.255839	0.468	0.564	0.275351	24mth	Pdcd4
1.05242e-05	-0.527807	0.144	0.23	0.294656	24mth	Hspb1
1.07926e-05	0.273341	0.415	0.307	0.302171	24mth	Naalad2
1.21039e-05	-0.338821	0.091	0.171	0.338886	24mth	Sparcl1
1.56501e-05	0.361865	0.144	0.079	0.438172	24mth	Ptger4
1.57118e-05	-0.294645	0.368	0.446	0.439898	24mth	Pgs1
1.59957e-05	-0.307939	0.255	0.355	0.447847	24mth	Tmem204
1.68026e-05	-0.26641	0.439	0.534	0.470439	24mth	Siah2
1.71809e-05	0.310024	0.279	0.194	0.481032	24mth	Tmem106a
1.79673e-05	0.272838	0.421	0.318	0.503049	24mth	H2-M3
1.91726e-05	0.257202	0.761	0.678	0.536796	24mth	Pgam1
2.15453e-05	0.251397	0.34	0.243	0.603226	24mth	Mmp14
2.92279e-05	-0.257858	0.389	0.482	0.818323	24mth	Dusp18
3.10563e-05	-0.275435	0.277	0.377	0.869513	24mth	Itpkc
3.20834e-05	0.281411	0.3	0.212	0.89827	24mth	Mthfd2
3.30696e-05	-0.258397	0.318	0.414	0.925883	24mth	Dusp8
3.85376e-05	-0.313539	0.126	0.205	1	24mth	Gm12166
3.87351e-05	0.280194	0.765	0.718	1	24mth	Pld3
3.94529e-05	0.297855	0.532	0.454	1	24mth	Cd48
4.0043e-05	0.284757	0.192	0.118	1	24mth	Lmnb1
4.57419e-05	0.322067	0.215	0.141	1	24mth	Gpr65
5.18949e-05	0.277662	0.425	0.337	1	24mth	Tnfsf13b
5.9054e-05	-0.30298	0.073	0.141	1	24mth	Sik3
6.09536e-05	-0.253095	0.348	0.44	1	24mth	B4galt6
6.63652e-05	-0.31534	0.067	0.132	1	24mth	Nmrk1
6.79997e-05	0.273274	0.211	0.136	1	24mth	Rftn1
7.10274e-05	0.340331	0.233	0.158	1	24mth	Cd274
7.70023e-05	0.316174	0.19	0.122	1	24mth	St8sia6
9.59714e-05	-0.287073	0.19	0.276	1	24mth	Ttpal
9.74247e-05	-0.309097	0.237	0.317	1	24mth	Rbm38
0.000107317	-0.288011	0.211	0.297	1	24mth	Trim65
0.000107349	0.28384	0.186	0.119	1	24mth	Tipin
0.000116507	-0.261429	0.429	0.495	1	24mth	Tap2
0.000126785	-0.26477	0.267	0.357	1	24mth	Sik2
0.000144229	-0.284023	0.111	0.185	1	24mth	Capn7
0.000164244	0.280959	0.249	0.176	1	24mth	Rap2b
0.000171058	0.46759	0.415	0.338	1	24mth	Crip1
0.000172565	-0.25287	0.32	0.402	1	24mth	Zbtb2
0.000176886	0.259729	0.294	0.212	1	24mth	Cxcl10
0.00018255	0.297533	0.17	0.107	1	24mth	Fcgr4
0.000189381	-0.286654	0.13	0.205	1	24mth	Slc1a2
0.00019547	0.263666	0.19	0.122	1	24mth	Fgl2
0.000196536	-0.288818	0.16	0.232	1	24mth	Nckap5l
0.000212256	0.290692	0.366	0.297	1	24mth	Rilpl2
0.000215869	0.346428	0.18	0.117	1	24mth	Wfdc17
0.000217148	0.301573	0.322	0.245	1	24mth	Cpd
0.000220948	0.306852	0.18	0.119	1	24mth	Cd22
0.000283001	-0.27811	0.073	0.133	1	24mth	Spock2
0.000316904	-0.252287	0.156	0.229	1	24mth	Foxk1
0.000394706	-0.28946	0.18	0.252	1	24mth	Gm43936
0.000401361	0.406724	0.146	0.091	1	24mth	Lgals1
0.0004043	-0.280796	0.083	0.142	1	24mth	Satb1
0.000420507	-0.284386	0.128	0.193	1	24mth	Ccdc117
0.000457606	-0.268465	0.158	0.228	1	24mth	Gm26778
0.000500266	-0.256365	0.211	0.291	1	24mth	Gm27010
0.000535788	-0.254513	0.194	0.272	1	24mth	Leng9
0.000657117	0.505295	0.393	0.324	1	24mth	Cxcl2
0.000735756	-0.257183	0.235	0.301	1	24mth	Cfap74
0.000948837	-0.281582	0.095	0.15	1	24mth	2810454H06Rik
0.0010723	-0.260812	0.132	0.195	1	24mth	Acvr1
0.00109791	0.285069	0.154	0.103	1	24mth	Myo5a
0.00111715	0.256135	0.174	0.119	1	24mth	Ly6a
0.00164893	-0.261053	0.057	0.102	1	24mth	Ermp1
0.00215544	-0.284532	0.204	0.266	1	24mth	Mt3
0.0037674	-0.254234	0.117	0.169	1	24mth	Dnaja4
0.00450331	0.274224	0.138	0.093	1	24mth	Srxn1
0.00463628	0.341167	0.277	0.225	1	24mth	Adssl1
0.00634123	0.256185	0.221	0.169	1	24mth	Iqgap1
0.00678052	0.29992	0.194	0.145	1	24mth	Tnfsf9
0.0096879	-0.26672	0.257	0.315	1	24mth	Exosc2

## Sheet: 6- vs 12-month expression
	p_val	avg_logFC	pct.1	pct.2	p_val_adj
Uba52	1.68026e-95	1.09367	0.967	0.656	4.7044e-91
AY036118	7.89457e-84	1.06467	0.93	0.551	2.21032e-79
Gm26917	5.92501e-70	1.01103	0.9	0.526	1.65888e-65
Tgfb1	1.32807e-60	0.542193	0.998	0.972	3.71834e-56
Rpl23a	1.19097e-52	0.286727	1	1	3.33447e-48
Rpl27	2.10769e-52	0.533414	0.994	0.947	5.9011e-48
Rpl15	6.2699e-43	0.448056	0.986	0.958	1.75545e-38
Rps28	1.96684e-41	0.335429	1	1	5.50677e-37
H2-D1	1.15909e-32	0.333517	0.998	0.998	3.24521e-28
Rnaset2b	1.20343e-31	0.625408	0.857	0.64	3.36936e-27
Sft2d1	5.08909e-30	0.373712	0.988	0.965	1.42484e-25
Hspa1a	2.34388e-29	0.703392	0.922	0.822	6.56239e-25
Rnaset2a	3.18107e-29	0.585825	0.871	0.671	8.90635e-25
Hivep2	6.2234e-29	1.05547	0.374	0.092	1.74243e-24
Gm10076	2.6877e-28	0.334899	0.998	0.994	7.52502e-24
Ly86	3.683e-27	0.294507	0.998	0.998	1.03117e-22
Gm10073	1.50558e-26	0.437024	0.953	0.866	4.21532e-22
Dnajb1	2.38272e-20	0.481566	0.973	0.949	6.67114e-16
Wdr89	4.70035e-20	0.491051	0.828	0.638	1.316e-15
Ythdc1	6.75504e-20	0.411474	0.916	0.836	1.89128e-15
Erdr1	1.04623e-19	0.710006	0.442	0.186	2.92924e-15
Tnrc6c	1.30751e-19	0.613489	0.618	0.371	3.66077e-15
Hbb-bs	1.06807e-18	0.541567	0.339	0.114	2.99037e-14
Cox17	2.51382e-18	0.518928	0.726	0.48	7.03819e-14
Hspa1b	1.40721e-16	0.831475	0.325	0.123	3.93991e-12
Il1a	3.98337e-16	0.324723	0.99	0.976	1.11526e-11
Arpc4	1.66416e-15	0.363109	0.92	0.816	4.65931e-11
Cd9	5.31327e-15	0.274496	1	0.998	1.48761e-10
Rpl23a-ps3	3.87508e-14	0.341412	0.91	0.801	1.08494e-09
Adap2	1.1357e-13	-0.272545	0.937	0.974	3.17974e-09
Ost4	1.18407e-13	0.362791	0.847	0.746	3.31516e-09
Mid1	5.53818e-13	0.603312	0.431	0.235	1.55058e-08
Nav3	6.52883e-13	-0.280681	0.892	0.949	1.82794e-08
Snrpg	8.27158e-13	0.353363	0.836	0.689	2.31588e-08
Rps27rt	9.20383e-13	0.39291	0.808	0.675	2.57689e-08
Cd74	9.70355e-13	0.365854	0.785	0.621	2.7168e-08
Apoe	6.96407e-12	0.574055	0.992	0.967	1.9498e-07
Gm26825	1.33809e-11	0.592259	0.219	0.072	3.74639e-07
Gm42418	1.97208e-11	0.325384	1	0.993	5.52143e-07
Ankrd11	2.57141e-11	-0.252047	0.914	0.974	7.19944e-07
Lyz2	3.98168e-11	0.365868	0.973	0.952	1.11479e-06
Paxbp1	8.1627e-11	0.488259	0.431	0.248	2.28539e-06
Adap2os	9.58726e-11	0.29007	0.814	0.689	2.68424e-06
Bloc1s1	1.15405e-10	0.576947	0.164	0.044	3.23112e-06
Zfp292	1.30674e-10	-0.325124	0.763	0.866	3.65861e-06
Hist1h1e	2.75192e-10	-0.376774	0.591	0.726	7.70482e-06
Gm12166	3.14197e-10	0.511557	0.28	0.121	8.79688e-06
Crlf2	3.44465e-10	0.329872	0.83	0.722	9.64432e-06
Rpl9-ps6	8.01216e-10	0.443785	0.532	0.342	2.24324e-05
Grcc10	1.13256e-09	0.390914	0.603	0.423	3.17094e-05
Snhg6	1.90999e-09	0.476881	0.276	0.125	5.34759e-05
Snrpf	2.11655e-09	0.319655	0.769	0.647	5.92592e-05
Rnf5	2.6091e-09	0.386722	0.585	0.419	7.30495e-05
Nr4a1	2.64498e-09	0.434431	0.62	0.46	7.40543e-05
Nrp1	8.43236e-09	-0.275579	0.757	0.835	0.000236089
Adrb1	9.69996e-09	-0.486484	0.223	0.369	0.000271579
Tmbim1	1.19396e-08	0.440091	0.53	0.375	0.000334284
Sdhd	1.56648e-08	0.402503	0.472	0.309	0.000438583
Thoc2	2.29431e-08	-0.254166	0.755	0.838	0.000642362
Itga6	2.3063e-08	-0.258966	0.793	0.877	0.000645719
Lst1	3.89989e-08	0.257215	0.906	0.827	0.00109189
Gm11175	9.687e-08	0.409846	0.104	0.024	0.00271217
Gm20721	1.28969e-07	0.416041	0.123	0.035	0.00361087
Naa20	1.44699e-07	0.397575	0.485	0.329	0.00405127
Cd14	2.24799e-07	0.25585	0.975	0.96	0.00629391
Ndufa1	2.67164e-07	0.313147	0.736	0.621	0.00748006
H2-Ab1	3.71834e-07	0.368708	0.315	0.18	0.0104106
Upk1b	3.72417e-07	0.343903	0.665	0.548	0.0104269
Zwint	4.03653e-07	0.37869	0.401	0.261	0.0113015
Plaur	4.50156e-07	0.489733	0.344	0.208	0.0126035
Ildr2	5.06703e-07	0.432551	0.344	0.211	0.0141867
Ccl2	5.09517e-07	0.45741	0.346	0.21	0.0142655
Btaf1	5.30168e-07	-0.337739	0.466	0.588	0.0148436
H2-T23	6.46631e-07	0.363911	0.436	0.292	0.0181044
2810474O19Rik	6.97664e-07	-0.251356	0.757	0.831	0.0195332
Osbpl11	7.39133e-07	-0.276654	0.532	0.642	0.0206942
Rgs7bp	8.10966e-07	-0.438531	0.08	0.186	0.0227054
Gm10036	9.83706e-07	0.341165	0.423	0.278	0.0275418
Gm561	1.25781e-06	0.343942	0.37	0.232	0.0352163
H2-Aa	1.35561e-06	0.280257	0.172	0.072	0.0379545
Rapgef5	1.3663e-06	-0.299981	0.536	0.654	0.0382537
Kpna4	1.47824e-06	0.273996	0.714	0.608	0.0413877
B3gnt2	1.54071e-06	0.427925	0.143	0.055	0.0431368
9930021J03Rik	1.93357e-06	-0.305098	0.335	0.463	0.0541361
Cdyl	2.08011e-06	0.374645	0.288	0.164	0.0582388
Luzp1	2.22576e-06	-0.294428	0.382	0.517	0.0623168
Arid4b	2.64033e-06	-0.265249	0.597	0.722	0.0739238
Spock2	2.71827e-06	0.371627	0.211	0.105	0.0761062
Mthfs	2.83568e-06	0.343109	0.472	0.336	0.0793933
Kcnj12	3.74314e-06	0.388404	0.131	0.048	0.104801
Cysltr1	5.24377e-06	-0.269735	0.609	0.726	0.146815
Amd1	5.8221e-06	0.307851	0.415	0.283	0.163007
Cbfa2t3	6.14852e-06	-0.273662	0.569	0.66	0.172146
Rpl6l	7.07801e-06	0.282367	0.622	0.529	0.19817
Junos	7.50492e-06	0.384332	0.147	0.062	0.210123
Atp6v0c	9.94058e-06	0.372472	0.17	0.079	0.278316
Pgk1	1.43043e-05	0.336709	0.106	0.037	0.400491
Arid3a	1.49707e-05	-0.274885	0.401	0.529	0.419151
Tango2	1.53586e-05	-0.339536	0.288	0.408	0.43001
Ide	1.99382e-05	-0.355157	0.227	0.344	0.55823
Chka	2.04563e-05	-0.262911	0.677	0.779	0.572734
H2-Eb1	2.15871e-05	0.262948	0.145	0.064	0.604394
Phpt1	2.43687e-05	0.346374	0.325	0.208	0.682274
Rptor	2.66628e-05	-0.252256	0.566	0.671	0.746505
Spire1	3.3683e-05	-0.250627	0.554	0.649	0.943056
Otulin	3.56725e-05	0.319047	0.573	0.46	0.998758
Kif21b	3.85288e-05	-0.255284	0.575	0.654	1
Rgmb	3.86348e-05	0.291706	0.401	0.289	1
Lsp1	4.32753e-05	0.308784	0.575	0.456	1
Btg3	4.46526e-05	0.338596	0.149	0.07	1
Hif1an	4.53934e-05	-0.354386	0.149	0.25	1
Rps18-ps3	4.71978e-05	0.345678	0.16	0.077	1
Crls1	4.99757e-05	-0.341286	0.09	0.175	1
Ing4	7.4318e-05	-0.326446	0.227	0.335	1
Ddit4	8.41052e-05	-0.315903	0.115	0.206	1
Zc3h6	8.76946e-05	0.30674	0.131	0.059	1
Tob1	8.89301e-05	0.351783	0.135	0.062	1
Gpatch1	0.000102571	-0.374416	0.143	0.233	1
Gch1	0.000126856	0.343867	0.237	0.147	1
Csf1	0.000134784	0.308802	0.485	0.375	1
Bcl2a1a	0.00015585	0.361502	0.483	0.373	1
Tnks	0.000166474	-0.293926	0.243	0.346	1
Gpr137b-ps	0.000175021	-0.276041	0.321	0.432	1
Gng10	0.000186225	0.297266	0.153	0.079	1
Capg	0.000190472	0.276744	0.446	0.336	1
Banp	0.000203798	-0.320191	0.292	0.395	1
Tnfaip2	0.000212166	0.295739	0.722	0.64	1
Hist1h1c	0.000258044	-0.272448	0.497	0.57	1
Churc1	0.000270128	0.264884	0.438	0.338	1
Alg11	0.000273481	0.284496	0.172	0.094	1
Il1b	0.000298202	0.266463	0.476	0.373	1
Zhx1	0.000346774	-0.276212	0.413	0.504	1
Gm8797	0.000422074	0.274673	0.229	0.142	1
Cd48	0.000424095	0.271904	0.474	0.371	1
1110001J03Rik	0.000464596	0.290549	0.213	0.132	1
Rpa3	0.000484286	0.271383	0.119	0.057	1
Slc7a11	0.000485265	0.40673	0.164	0.092	1
Arhgap21	0.000490577	-0.301647	0.102	0.176	1
Atn1.1	0.000600068	0.282281	0.247	0.16	1
Nt5dc1	0.000624064	0.275684	0.106	0.05	1
Mras	0.000716276	-0.258181	0.354	0.436	1
Pltp	0.000738272	0.314453	0.168	0.097	1
Cep164	0.000777365	-0.254385	0.344	0.423	1
Snhg9	0.000778227	0.298144	0.215	0.134	1
Qser1	0.00078113	-0.303375	0.188	0.276	1
Rgs1	0.000844612	-0.278262	0.706	0.754	1
Adrbk2	0.000887691	-0.282122	0.184	0.263	1
Mthfsl	0.000902991	0.251882	0.417	0.316	1
Acvr2b	0.000914623	-0.297703	0.209	0.294	1
AI504432	0.000999146	0.255044	0.143	0.077	1
Dym	0.00100574	0.276296	0.192	0.119	1
Cxcl12	0.00100639	0.284069	0.106	0.051	1
Fbxo33	0.00100901	-0.276122	0.376	0.458	1
Smim4	0.00106866	0.30786	0.207	0.132	1
Crip1	0.00108473	0.272126	0.335	0.248	1
Camta2	0.00110256	-0.25059	0.327	0.404	1
Fam98a	0.00113654	-0.275979	0.178	0.254	1
Mpv17	0.00122977	0.262757	0.356	0.263	1
Piezo1	0.00127033	0.267365	0.247	0.165	1
Senp3	0.0014923	0.268661	0.26	0.178	1
Med16	0.00151622	-0.257529	0.18	0.256	1
Fxyd5	0.00185147	0.305256	0.155	0.092	1
Phka2	0.00188598	-0.276501	0.151	0.222	1
Myo18b	0.00204608	-0.258165	0.188	0.265	1
Bcl2a1d	0.00222009	0.301618	0.272	0.193	1
Pacsin1	0.00229257	-0.254149	0.055	0.107	1
Rrp15	0.00234877	-0.252125	0.166	0.237	1
Nrf1	0.00237201	-0.254533	0.278	0.362	1
Wdr91	0.00243906	-0.27458	0.098	0.164	1
Eps8l1	0.00250812	-0.259312	0.104	0.167	1
Emp3	0.00315941	0.263753	0.436	0.351	1
Hspa4l	0.00317107	-0.278272	0.074	0.127	1
Lig3	0.00362485	-0.285974	0.153	0.219	1
Cacnb2	0.00374881	-0.259348	0.086	0.142	1
Phyhd1	0.00387118	0.253971	0.139	0.083	1
Zfp715	0.00407856	-0.26846	0.252	0.318	1
Usp40	0.0043725	-0.27068	0.223	0.289	1
Clic4	0.00493815	0.292412	0.286	0.21	1
Uck1	0.00731058	0.254059	0.26	0.193	1
Gga3	0.00787359	-0.25068	0.135	0.193	1
Mettl6	0.0087339	-0.251187	0.2	0.261	1
Lmln	0.00877721	-0.250416	0.088	0.138	1
Guf1	0.0104701	-0.257991	0.074	0.119	1
Srxn1	0.0116931	0.271279	0.102	0.061	1
Tmem129	0.0148299	-0.263395	0.104	0.153	1
Glipr1	0.0149494	0.288163	0.204	0.151	1
Axl	0.0185727	0.256442	0.129	0.085	1
Cxcl2	0.0334812	0.346488	0.325	0.267	1
Gm12840	0.0583956	0.251804	0.151	0.11	1
Clu	0.0828264	0.268056	0.217	0.175	1
Exosc2	0.0944333	0.337966	0.348	0.309	1
Tnfsf9	0.133622	0.357747	0.143	0.114	1
Enpp2	0.444378	1.16688	0.112	0.097	1
Ttr	0.839555	1.55032	0.914	0.912	1

## Sheet: 6- vs 18-month expression
	p_val	avg_logFC	pct.1	pct.2	p_val_adj
Gm10076	2.49206e-84	-0.72287	0.952	0.994	6.97726e-80
Rps29	6.17033e-69	-0.27995	1	1	1.72757e-64
B2m	1.25447e-63	0.413066	1	1	3.51225e-59
Lyz2	3.6532e-62	0.933694	0.992	0.952	1.02282e-57
H2-D1	4.19762e-58	0.470075	1	0.998	1.17525e-53
Rhob	7.89247e-55	-0.296356	1	1	2.20973e-50
Crlf2	2.26604e-54	0.749042	0.933	0.722	6.34445e-50
Fth1	2.09368e-51	0.374436	1	1	5.8619e-47
Jund	2.62313e-50	-0.252552	1	1	7.34423e-46
Cd9	2.88048e-47	0.553126	0.998	0.998	8.06478e-43
Ctss	4.50582e-44	0.282368	1	1	1.26154e-39
Ttr	3.5727e-43	-0.661806	0.72	0.912	1.00028e-38
Cx3cr1	4.23979e-42	-0.29383	1	1	1.18706e-37
Timp2	1.25847e-38	0.316552	1	0.998	3.52346e-34
Cd63	7.61351e-38	0.442891	1	0.991	2.13163e-33
Ctsb	4.49045e-37	0.305018	1	1	1.25724e-32
Rnaset2b	1.17631e-33	0.601198	0.854	0.64	3.29343e-29
Rnaset2a	4.3216e-31	0.585683	0.881	0.671	1.20996e-26
Hbb-bs	5.11333e-31	0.757464	0.424	0.114	1.43163e-26
Rps28	6.03456e-31	0.275778	1	1	1.68956e-26
Srgn	9.48067e-31	0.452624	0.998	0.914	2.6544e-26
Fcgr3	1.8195e-29	0.254818	1	1	5.09424e-25
Npc2	3.70915e-29	0.25841	1	1	1.03849e-24
Apoe	1.44381e-26	1.53038	0.99	0.967	4.04238e-22
C5ar1	1.59116e-25	0.521419	0.9	0.778	4.45494e-21
Gm42418	3.75442e-25	0.572312	1	0.993	1.05116e-20
Ildr2	4.73693e-24	0.787047	0.493	0.211	1.32625e-19
Cd14	7.10285e-24	0.502418	0.983	0.96	1.98865e-19
Ccl3	2.94049e-23	0.479211	0.996	0.98	8.23279e-19
Il1a	1.57199e-21	0.383848	0.988	0.976	4.40126e-17
Prdx1	2.81195e-20	0.419669	0.956	0.89	7.87291e-16
Nav3	2.94873e-20	-0.380786	0.839	0.949	8.25584e-16
Cd52	1.90802e-19	0.514151	0.96	0.939	5.34207e-15
Pdia6	2.01318e-19	0.322394	0.979	0.934	5.6365e-15
Wdr89	7.9618e-18	0.454851	0.787	0.638	2.22914e-13
Ctsl	2.42918e-17	0.28617	1	1	6.80121e-13
Rpl27	2.61098e-17	0.290376	0.975	0.947	7.31022e-13
Hcar2	3.51005e-17	0.782372	0.395	0.169	9.82745e-13
Gm26532	3.73745e-16	-0.309848	0.927	0.976	1.04641e-11
Pik3r1	4.6625e-16	-0.285963	0.946	0.985	1.30541e-11
Col27a1	5.09197e-16	-0.309543	0.831	0.938	1.42565e-11
Cxcl16	5.23823e-16	0.454263	0.831	0.695	1.4666e-11
Il1b	7.67038e-16	0.7143	0.591	0.373	2.14755e-11
Tnfaip2	8.2459e-16	0.531834	0.779	0.64	2.30869e-11
Arsb	9.10895e-16	-0.393527	0.666	0.831	2.55032e-11
Nrip1	1.20286e-15	-0.277735	0.923	0.974	3.36776e-11
Ktn1	1.20544e-15	-0.358923	0.764	0.864	3.37498e-11
Map4k4	2.80103e-15	-0.308054	0.829	0.914	7.84233e-11
Nr4a1	4.27103e-15	0.567643	0.647	0.46	1.1958e-10
Ccl4	4.8167e-14	0.357683	0.994	0.993	1.34858e-09
Rgs7bp	5.99211e-14	-0.693274	0.04	0.186	1.67767e-09
Ctsc	7.64578e-14	0.292056	0.975	0.954	2.14067e-09
Arid4a	8.68881e-14	-0.353112	0.714	0.866	2.43269e-09
Hk2	3.29991e-13	-0.255399	0.962	0.987	9.2391e-09
Sdf2l1	3.39056e-13	0.310792	0.967	0.886	9.4929e-09
Sox4	3.4728e-13	-0.335384	0.81	0.899	9.72315e-09
Arid1a	4.98632e-13	-0.281408	0.868	0.936	1.39607e-08
Ddit3	9.69815e-13	-0.341983	0.75	0.869	2.71529e-08
Shisa5	1.15349e-12	0.32987	0.873	0.781	3.22954e-08
Btaf1	1.40312e-12	-0.454081	0.386	0.588	3.92845e-08
Crip1	1.66428e-12	0.676732	0.436	0.248	4.65964e-08
Rapgef5	2.6231e-12	-0.454558	0.468	0.654	7.34416e-08
Serpine1	9.47959e-12	0.544098	0.653	0.496	2.65409e-07
H2-DMa	1.2868e-11	0.266723	0.958	0.91	3.60278e-07
Aldoa	1.29889e-11	0.280197	0.964	0.928	3.63663e-07
Gm10116	1.78534e-11	-0.401501	0.578	0.715	4.99859e-07
Ikzf1	2.16812e-11	-0.28148	0.846	0.923	6.0703e-07
Tmx4	2.3477e-11	-0.271026	0.921	0.956	6.57308e-07
Neurl3	2.38746e-11	-0.26642	0.85	0.915	6.68441e-07
Csf1	4.02113e-11	0.520583	0.559	0.375	1.12584e-06
Anxa5	5.44656e-11	0.501199	0.572	0.386	1.52493e-06
Lgals3bp	6.01833e-11	0.477642	0.662	0.489	1.68501e-06
Cst7	6.58878e-11	0.763897	0.349	0.186	1.84473e-06
Txnrd1	2.00158e-10	0.390502	0.616	0.441	5.60403e-06
Slfn2	3.26119e-10	0.406085	0.716	0.561	9.13068e-06
AI504432	3.7198e-10	0.597672	0.211	0.077	1.04147e-05
Pde2a	5.97404e-10	0.437012	0.532	0.355	1.67261e-05
Slc7a11	6.42476e-10	0.699003	0.226	0.092	1.7988e-05
Kat6a	7.51872e-10	-0.268001	0.664	0.812	2.10509e-05
Kcnj12	8.1729e-10	0.515223	0.165	0.048	2.28825e-05
Hba-a1	8.86185e-10	0.392356	0.152	0.04	2.48114e-05
Ifi27l2a	1.22396e-09	0.671962	0.319	0.165	3.42684e-05
Csmd3	1.46655e-09	-0.325826	0.668	0.754	4.10606e-05
Tlr2	1.97514e-09	0.355898	0.833	0.737	5.53e-05
Arhgap15	2.09031e-09	0.524668	0.121	0.026	5.85245e-05
Axl	2.27545e-09	0.620004	0.211	0.085	6.3708e-05
Atp6ap2	2.71858e-09	0.324226	0.835	0.719	7.61147e-05
Hist1h1e	2.89525e-09	-0.348566	0.591	0.726	8.10613e-05
Plaur	3.01608e-09	0.549151	0.359	0.208	8.44441e-05
Rab7b	3.28647e-09	0.513076	0.102	0.017	9.20145e-05
Igsf6	3.45997e-09	0.374917	0.599	0.456	9.68722e-05
Zfp292	4.42922e-09	-0.290315	0.787	0.866	0.000124009
Gltp	5.12461e-09	0.269711	0.869	0.807	0.000143479
Fxyd5	5.93211e-09	0.692562	0.215	0.092	0.000166087
Mageh1	6.48923e-09	0.492762	0.109	0.022	0.000181686
Tpd52	7.77525e-09	0.275405	0.845	0.752	0.000217691
Bcl2a1a	7.77693e-09	0.474699	0.526	0.373	0.000217739
Gm10036	7.92911e-09	0.386121	0.441	0.278	0.000221999
Naalad2	9.73386e-09	0.484959	0.388	0.23	0.000272529
Hspa1b	1.00455e-08	0.529608	0.255	0.123	0.000281255
Glipr1	1.17063e-08	0.559975	0.29	0.151	0.000327753
Smim3	1.49857e-08	0.416286	0.56	0.406	0.00041957
Tuba1c	1.53403e-08	0.469635	0.432	0.283	0.000429499
Prkca	1.56286e-08	-0.390539	0.369	0.511	0.00043757
Lsp1	1.64971e-08	0.39256	0.608	0.456	0.000461886
Itga6	1.74486e-08	-0.250536	0.814	0.877	0.000488526
Hes1	2.17996e-08	-0.254331	0.816	0.881	0.000610346
Cstb	2.34539e-08	0.36038	0.821	0.746	0.000656663
Vkorc1	2.54448e-08	0.266793	0.775	0.643	0.000712405
Stx16	2.58701e-08	-0.266353	0.585	0.744	0.000724312
Mtss1	2.819e-08	-0.30871	0.553	0.676	0.000789264
Tmbim1	3.05374e-08	0.394183	0.522	0.375	0.000854986
Prpf4b	3.09599e-08	-0.253572	0.8	0.869	0.000866814
Tspo	3.82722e-08	0.337089	0.781	0.686	0.00107154
Pid1	3.83029e-08	-0.30673	0.662	0.748	0.00107241
St8sia6	4.5821e-08	0.456436	0.192	0.079	0.0012829
Glmp	7.11985e-08	0.254258	0.821	0.726	0.00199342
Gstp1	7.16759e-08	-0.489033	0.054	0.154	0.00200678
Cd48	8.13788e-08	0.41717	0.52	0.371	0.00227844
Tpi1	9.0766e-08	0.342972	0.733	0.612	0.00254127
Cybb	9.11616e-08	0.621006	0.14	0.046	0.00255234
Lgals3	9.18528e-08	0.548649	0.163	0.061	0.00257169
Cox17	9.74381e-08	0.313018	0.635	0.48	0.00272807
Fam20c	1.03127e-07	0.554983	0.155	0.055	0.00288736
S100a8	1.43014e-07	0.505114	0.165	0.064	0.00400409
Gm26802	1.5646e-07	-0.54016	0.111	0.23	0.00438056
Klhdc8b	1.76858e-07	-0.336841	0.399	0.537	0.00495166
Tnf	1.88078e-07	0.250309	0.964	0.921	0.00526581
S100a9	1.93407e-07	0.438979	0.132	0.042	0.00541502
Nudcd3	2.00885e-07	-0.275505	0.618	0.739	0.00562438
Nos1ap	2.06568e-07	-0.361627	0.28	0.438	0.0057835
Cd74	2.31658e-07	0.261054	0.733	0.621	0.00648595
AY036118	2.45351e-07	0.320744	0.658	0.551	0.00686935
Ccnl2	2.48577e-07	-0.25896	0.697	0.794	0.00695965
Vav2	2.97613e-07	-0.340011	0.401	0.553	0.00833258
Mir155hg	3.32492e-07	0.514672	0.211	0.099	0.0093091
Upk1b	3.65882e-07	0.34947	0.655	0.548	0.010244
Whrn	4.50767e-07	-0.295169	0.635	0.732	0.0126206
Ahsa1	5.00173e-07	0.253293	0.775	0.667	0.0140039
Gpr84	5.19984e-07	0.277265	0.894	0.871	0.0145585
Nsun6	5.24267e-07	-0.381278	0.395	0.506	0.0146784
Wfdc17	5.87488e-07	0.522531	0.182	0.081	0.0164485
Mtmr10	6.19831e-07	-0.378589	0.286	0.419	0.017354
Acox3	6.69843e-07	-0.269317	0.727	0.82	0.0187543
Emsy	7.43195e-07	-0.340418	0.321	0.461	0.020808
Gch1	7.51105e-07	0.430277	0.267	0.147	0.0210294
Larp4b	7.60023e-07	-0.269782	0.658	0.754	0.0212791
Dhx9	8.382e-07	-0.262836	0.689	0.77	0.0234679
Cbfa2t3	8.86217e-07	-0.323059	0.56	0.66	0.0248123
Rnf149	1.39102e-06	0.293876	0.758	0.682	0.0389459
Myo18b	1.43028e-06	-0.423811	0.152	0.265	0.040045
Fam193a	1.55248e-06	-0.333003	0.459	0.574	0.0434662
Chst2	1.57012e-06	0.490435	0.152	0.062	0.0439601
Cd180	1.84205e-06	-0.264967	0.689	0.785	0.0515736
Nf1	2.17285e-06	-0.290589	0.43	0.559	0.0608356
Capg	2.31716e-06	0.545968	0.436	0.336	0.0648759
Akt1	2.33956e-06	-0.301047	0.491	0.621	0.0655031
Ms4a6d	2.4019e-06	0.303216	0.608	0.465	0.0672483
Rasa1	2.47262e-06	-0.271155	0.547	0.651	0.0692285
Ifi204	2.47935e-06	0.396904	0.225	0.114	0.069417
Cirbp	2.49894e-06	-0.318865	0.447	0.553	0.0699654
Tagln2	2.85002e-06	0.256622	0.699	0.568	0.0797948
Ramp1	2.92231e-06	-0.283754	0.472	0.585	0.0818187
Gnaq	2.95281e-06	-0.269428	0.587	0.688	0.0826727
Abl1	3.02264e-06	-0.266318	0.557	0.689	0.084628
H2-Ab1	3.12057e-06	0.344933	0.296	0.18	0.0873698
N4bp2l1	3.36506e-06	-0.262889	0.434	0.575	0.0942151
Ifi30	3.94701e-06	0.25442	0.714	0.607	0.110508
Kpnb1	4.0794e-06	-0.263529	0.551	0.664	0.114215
Lrch4	4.30217e-06	-0.40852	0.188	0.309	0.120452
Lmna	4.31876e-06	0.497821	0.294	0.186	0.120917
Emp3	4.34506e-06	0.389628	0.472	0.351	0.121653
Spen	4.43832e-06	-0.289407	0.438	0.557	0.124264
Nr2c2	4.63526e-06	-0.367188	0.261	0.381	0.129778
Slc44a2	5.44627e-06	-0.314737	0.43	0.548	0.152485
Cacna1s	6.46379e-06	0.415724	0.232	0.127	0.180973
Gm10020	6.65594e-06	-0.378116	0.107	0.208	0.186353
Mif	6.8028e-06	0.257428	0.841	0.79	0.190465
Ly9	7.28389e-06	0.468257	0.2	0.101	0.203934
Git1	7.52144e-06	-0.372623	0.171	0.283	0.210585
Kif21b	7.87159e-06	-0.275653	0.559	0.654	0.220389
Rapgef6	1.0288e-05	-0.265622	0.572	0.676	0.288044
Rpl9-ps6	1.07946e-05	0.308725	0.463	0.342	0.302228
AI607873	1.0978e-05	0.55861	0.186	0.092	0.307362
Clec4a3	1.13955e-05	0.269188	0.61	0.48	0.31905
Tiam1	1.17029e-05	-0.398306	0.04	0.11	0.327657
Dhx8	1.17575e-05	-0.328088	0.19	0.309	0.329188
Arid3a	1.1876e-05	-0.254649	0.395	0.529	0.332506
Slc40a1	1.23674e-05	-0.261114	0.532	0.634	0.346261
Lrrc25	1.302e-05	0.287274	0.62	0.511	0.364535
Fbxl20	1.32763e-05	-0.321642	0.236	0.349	0.371709
Pgam1	1.33379e-05	0.255341	0.724	0.631	0.373434
Rasgef1b	1.36173e-05	0.272747	0.76	0.676	0.381258
Tufm	1.44373e-05	0.363116	0.223	0.123	0.404216
Dusp5	1.49235e-05	0.366259	0.357	0.241	0.417827
H2-Q7	1.54871e-05	0.323506	0.38	0.259	0.433607
Tmem44	1.59189e-05	-0.333204	0.155	0.263	0.445696
Bst2	1.59507e-05	0.266768	0.76	0.691	0.446588
Wdr44	1.69071e-05	-0.263752	0.482	0.608	0.473364
Luc7l	1.75545e-05	-0.325004	0.326	0.445	0.49149
Rbm27	1.85036e-05	-0.278522	0.497	0.605	0.518063
Med22	1.9932e-05	-0.291341	0.332	0.467	0.558057
Sbno2	2.00108e-05	-0.318815	0.353	0.48	0.560262
Kdm3a	2.0149e-05	-0.310667	0.324	0.443	0.564133
Acot9	2.08891e-05	0.375911	0.207	0.114	0.584853
Gm26917	2.23576e-05	0.261425	0.622	0.526	0.625969
Gm12166	2.32621e-05	0.34398	0.221	0.121	0.651291
Fcgr4	2.38341e-05	0.407877	0.171	0.086	0.667308
Chst1	2.39065e-05	0.41078	0.38	0.274	0.669334
Usp50	2.45733e-05	-0.371605	0.109	0.202	0.688003
Cldn5	2.46837e-05	-0.358874	0.107	0.2	0.691093
Pdcd1	2.61535e-05	0.389991	0.113	0.044	0.732245
1810011O10Rik	2.77587e-05	0.380389	0.188	0.097	0.777187
Cxcl2	2.91449e-05	0.735033	0.382	0.267	0.815999
Akna	2.9253e-05	-0.285153	0.432	0.546	0.819026
Zhx1	3.01467e-05	-0.289621	0.393	0.504	0.844047
Sepw1	3.10249e-05	0.261064	0.71	0.643	0.868636
Pgp	3.12523e-05	-0.263564	0.53	0.643	0.875001
Lpp	3.3779e-05	-0.293938	0.211	0.324	0.945745
Clic4	3.63711e-05	0.441392	0.315	0.21	1
Prkd3	3.8837e-05	-0.258138	0.369	0.489	1
Lxn	4.57615e-05	0.330737	0.305	0.197	1
Arap2	4.78262e-05	-0.341403	0.104	0.189	1
Ankrd33b	4.80978e-05	0.397578	0.148	0.07	1
Chd6	4.81949e-05	-0.278251	0.445	0.539	1
Mef2d	4.83421e-05	-0.250993	0.459	0.57	1
H2-Q6	4.99525e-05	0.307705	0.372	0.261	1
Itgax	5.16449e-05	0.396272	0.113	0.046	1
Cd274	5.51601e-05	0.364694	0.207	0.116	1
Upf2	5.99009e-05	-0.254108	0.499	0.621	1
Scd2	6.25194e-05	-0.291282	0.215	0.322	1
Swt1	6.56062e-05	-0.262652	0.451	0.566	1
Gsto1	6.59931e-05	0.267899	0.43	0.307	1
Arl5c	6.64431e-05	0.295604	0.662	0.572	1
Tsc1	6.73631e-05	-0.305164	0.217	0.329	1
Vtn	6.80886e-05	-0.316047	0.104	0.188	1
Thap2	6.99497e-05	-0.333834	0.129	0.217	1
Foxo1	7.08711e-05	-0.318298	0.242	0.351	1
Ssh1	7.20088e-05	-0.332887	0.148	0.243	1
Pvrl2	7.88196e-05	-0.292704	0.29	0.401	1
Zfp658	8.18452e-05	-0.311719	0.117	0.208	1
AB124611	8.24195e-05	0.346532	0.106	0.042	1
Slc15a2	8.3077e-05	-0.303437	0.05	0.118	1
Zwint	8.47627e-05	0.340135	0.363	0.261	1
Smad4	8.80805e-05	-0.270731	0.301	0.415	1
Trpm2	9.03138e-05	0.258754	0.459	0.349	1
Zfp715	9.58946e-05	-0.311612	0.217	0.318	1
Cd22	9.64665e-05	0.312131	0.167	0.086	1
Bcl9l	9.74775e-05	-0.302497	0.338	0.438	1
Pecam1	0.000103947	-0.330471	0.142	0.235	1
Sult1a1	0.000104983	0.289724	0.493	0.386	1
Ezh2	0.000106522	-0.348098	0.069	0.142	1
Bcl2a1d	0.000108027	0.354223	0.284	0.193	1
St14	0.000109355	0.358088	0.219	0.131	1
Ide	0.00011486	-0.298291	0.24	0.344	1
Narf	0.000126263	-0.305964	0.211	0.312	1
Rps18-ps3	0.000136036	0.348836	0.15	0.077	1
Lmln	0.000136167	-0.339118	0.067	0.138	1
Smad3	0.000138303	-0.28771	0.319	0.412	1
Sfmbt1	0.000140854	-0.298723	0.29	0.393	1
Cep350	0.000140865	-0.28801	0.486	0.568	1
Cd72	0.000142965	0.375141	0.15	0.075	1
Tfdp2	0.00014458	-0.26458	0.173	0.272	1
Med12	0.000147483	-0.291934	0.169	0.263	1
Ncoa3	0.000149035	-0.250237	0.524	0.608	1
Snhg12	0.000155214	-0.256888	0.443	0.553	1
Sipa1l1	0.000165606	-0.278886	0.288	0.393	1
Cramp1l	0.000167185	-0.329884	0.207	0.301	1
Arhgap27	0.000170528	-0.260693	0.382	0.485	1
Gtf3c4	0.000185592	-0.303868	0.167	0.259	1
Nudt4	0.000186577	-0.256451	0.516	0.627	1
Baiap2	0.000189966	0.401573	0.276	0.186	1
Epha2	0.000205565	0.25234	0.393	0.29	1
Dolk	0.000215937	0.257669	0.257	0.165	1
Anks6	0.000217028	-0.3195	0.071	0.14	1
Naa16	0.000217283	-0.274354	0.171	0.267	1
Tob1	0.000223752	0.317869	0.129	0.062	1
Ehd1	0.000224612	0.32382	0.238	0.149	1
Gabbr1	0.000225099	-0.258013	0.355	0.458	1
Setd7	0.000228723	-0.267286	0.186	0.278	1
Mdfi	0.000230773	-0.284789	0.211	0.307	1
Gadd45g	0.000232437	-0.268581	0.374	0.487	1
Ifitm3	0.000234023	0.638005	0.288	0.195	1
Zfp30	0.000237444	-0.311995	0.125	0.206	1
Tpm4	0.000237645	0.29123	0.476	0.357	1
Rreb1	0.000238893	-0.255948	0.491	0.585	1
Cox6a2	0.00023929	0.466619	0.15	0.079	1
Trim44	0.000259875	-0.254132	0.42	0.515	1
Fam134c	0.000265465	-0.308337	0.238	0.327	1
Phf11b	0.000267755	0.296067	0.18	0.103	1
Adgrl2	0.000270502	-0.2991	0.113	0.189	1
Errfi1	0.000291841	0.269138	0.57	0.498	1
Fam193b	0.000303558	-0.320366	0.129	0.208	1
Fam13b	0.000317239	-0.281991	0.173	0.259	1
Gm9484	0.00032198	-0.293253	0.056	0.118	1
Tnfsf13b	0.000325177	0.30178	0.38	0.287	1
Il7r	0.000365233	-0.309164	0.165	0.25	1
Zfp839	0.000371397	-0.303801	0.288	0.379	1
E130102H24Rik	0.000383604	-0.294108	0.132	0.213	1
Gpr137b-ps	0.000397915	-0.268676	0.34	0.432	1
Lilrb4a	0.000399576	0.464268	0.192	0.119	1
Rftn1	0.000422299	0.310822	0.177	0.103	1
Uap1l1	0.000432639	0.250768	0.553	0.465	1
Tmc7	0.000435318	-0.290875	0.113	0.188	1
Chid1	0.000450286	0.295128	0.251	0.167	1
Mid1	0.000492571	0.31872	0.321	0.235	1
Zfp703	0.000498974	-0.273787	0.351	0.445	1
Tspyl2	0.000502542	-0.289426	0.292	0.377	1
Gm10269	0.000507088	-0.302919	0.061	0.123	1
Camsap2	0.000520673	-0.303514	0.228	0.312	1
Sp100	0.000541862	0.29543	0.161	0.09	1
Epn2	0.000590488	-0.270035	0.257	0.346	1
Btbd7	0.000591758	-0.323961	0.236	0.322	1
Nrf1	0.000642984	-0.271226	0.271	0.362	1
Mllt4	0.000646439	0.301545	0.213	0.134	1
Casp8ap2	0.000674165	-0.282131	0.326	0.415	1
Sema4g	0.000677975	-0.323971	0.134	0.208	1
Synj2	0.000700488	0.263979	0.163	0.094	1
D030056L22Rik	0.000711536	-0.267735	0.073	0.136	1
Emp2	0.00072837	0.307458	0.111	0.055	1
Camta2	0.000732081	-0.267608	0.319	0.404	1
Fyco1	0.000750352	-0.251753	0.248	0.338	1
Sorl1	0.000788559	0.276052	0.238	0.162	1
Fam71a	0.000793749	-0.346735	0.058	0.114	1
Kcna7	0.00079527	-0.289918	0.079	0.143	1
Bcat2	0.00079601	0.268784	0.267	0.182	1
Lipe	0.000798025	-0.275139	0.261	0.346	1
Gatad2a	0.000798626	-0.271589	0.392	0.469	1
Srxn1	0.000801989	0.315152	0.119	0.061	1
Gatsl2	0.00080773	-0.260439	0.106	0.176	1
Igtp	0.000813077	0.255094	0.33	0.237	1
Zfp322a	0.000843165	-0.304464	0.092	0.156	1
Zfp180	0.000845273	-0.258047	0.09	0.158	1
Gm13889	0.000854524	-0.412217	0.155	0.232	1
Snhg6	0.000868351	0.262756	0.202	0.125	1
Itgb3	0.000871331	-0.298559	0.217	0.296	1
Ldlrap1	0.000897926	-0.26374	0.184	0.268	1
Prpf39	0.000900269	-0.271175	0.255	0.346	1
Ctla2b	0.00097488	0.313812	0.255	0.173	1
Taf3	0.000995877	-0.253542	0.443	0.52	1
Atg13	0.00100956	-0.266673	0.098	0.165	1
2700081O15Rik	0.00101077	-0.272601	0.054	0.108	1
Xpo7	0.00104831	-0.274185	0.278	0.364	1
Kat2b	0.00105781	-0.281378	0.132	0.208	1
Exog	0.00106431	-0.276242	0.107	0.178	1
Akt2	0.00107463	-0.263257	0.28	0.36	1
Enox2	0.00110006	-0.293261	0.075	0.136	1
Dpp7	0.00110968	0.315831	0.324	0.244	1
Gpr65	0.00112015	0.308105	0.175	0.105	1
Tnfsf9	0.00115996	0.436801	0.18	0.114	1
2810454H06Rik	0.00116638	-0.280654	0.109	0.176	1
Zfyve19	0.00117361	-0.265804	0.309	0.404	1
Mast2	0.00117573	-0.258672	0.086	0.151	1
Bzw2	0.00118898	-0.289533	0.106	0.173	1
Meox1	0.00121123	0.271786	0.117	0.061	1
2410022M11Rik	0.00121891	-0.28248	0.081	0.143	1
Cox10	0.00122291	-0.251586	0.138	0.215	1
Cd244	0.00122744	0.28345	0.107	0.053	1
Cask	0.00123681	-0.250722	0.395	0.478	1
Lsm1	0.00128673	-0.255794	0.303	0.39	1
Lrrc75a	0.00131746	-0.26139	0.1	0.167	1
Acvr2a	0.00132051	-0.284261	0.094	0.158	1
Nckipsd	0.00132312	-0.278266	0.142	0.215	1
Map3k4	0.00134417	-0.263447	0.378	0.458	1
Jarid2	0.00140719	-0.26709	0.303	0.377	1
Prrc2b	0.00140963	-0.256511	0.301	0.384	1
Inip	0.00147881	-0.261222	0.202	0.278	1
Dgcr8	0.00155008	-0.261519	0.054	0.107	1
Wipf2	0.00157785	-0.268379	0.294	0.371	1
Gga3	0.00159021	-0.274927	0.125	0.193	1
Elf4	0.00159655	-0.287124	0.251	0.324	1
Cdc25a	0.00161556	-0.294403	0.071	0.129	1
Fblim1	0.00176211	0.279169	0.223	0.151	1
Itm2a	0.00176263	-0.268424	0.05	0.101	1
B3gnt2	0.00177214	0.290676	0.106	0.055	1
Hjurp	0.00179782	-0.250546	0.288	0.369	1
Tnfrsf17	0.00183696	-0.264201	0.269	0.355	1
Vcam1	0.00187234	0.357755	0.34	0.263	1
Gm26740	0.00203676	0.309025	0.202	0.134	1
Tmem198b	0.00204823	0.254253	0.136	0.077	1
Fbxo32	0.0020493	-0.266217	0.104	0.169	1
As3mt	0.00209833	0.259974	0.472	0.404	1
Gm12840	0.00216647	0.307574	0.175	0.11	1
Htra3	0.00219064	0.282933	0.205	0.136	1
Wdr91	0.00235915	-0.259968	0.1	0.164	1
AW112010	0.00238701	0.285246	0.265	0.191	1
Cpe	0.00241521	-0.262748	0.138	0.206	1
Snx19	0.00241528	-0.269572	0.125	0.193	1
Ankrd26	0.00245479	-0.275688	0.265	0.347	1
Tbc1d4	0.00252022	-0.256494	0.094	0.156	1
Fbf1	0.00253709	-0.250198	0.058	0.108	1
Insr	0.00257315	-0.266068	0.203	0.276	1
Gatsl3	0.00260987	0.263606	0.207	0.142	1
Arid2	0.00284395	-0.273873	0.274	0.34	1
Il6	0.0029455	0.255176	0.123	0.07	1
Tgfbrap1	0.00294925	-0.269617	0.269	0.351	1
Calcoco1	0.00296489	-0.282517	0.119	0.182	1
Tec	0.0030263	-0.257269	0.276	0.346	1
BC029214	0.00355836	-0.254922	0.146	0.211	1
Zbtb45	0.00368013	-0.278862	0.113	0.176	1
Dhx40	0.00374527	0.273088	0.472	0.397	1
Hspa1a	0.00380712	0.286349	0.827	0.822	1
Gdap10	0.00384554	-0.262946	0.077	0.129	1
Ypel2	0.00390025	-0.256991	0.113	0.171	1
Gm43603	0.00401341	-0.25008	0.163	0.232	1
1110001J03Rik	0.00463654	0.263958	0.196	0.132	1
Lig3	0.0046886	-0.266952	0.155	0.219	1
Lilra5	0.0047001	0.261215	0.163	0.107	1
Qtrt1	0.00485524	-0.255856	0.213	0.283	1
Gpm6b	0.00502403	-0.252079	0.071	0.123	1
Stam	0.00529906	-0.270328	0.111	0.169	1
Tsc2	0.00541154	-0.250396	0.146	0.206	1
Zfp358	0.0054523	-0.268571	0.14	0.2	1
Cd80	0.00550327	0.253285	0.144	0.09	1
Jade1	0.0055047	-0.254282	0.2	0.272	1
Rfx7	0.00555972	-0.255576	0.157	0.222	1
Lmnb1	0.00576612	0.271123	0.142	0.088	1
Vim	0.00682678	0.357535	0.136	0.086	1
Ccl6	0.00683278	0.291297	0.774	0.768	1
Agap1	0.00742738	-0.263475	0.083	0.132	1
Sh3bp5l	0.00764092	-0.254619	0.081	0.129	1
Atp1a2	0.00851967	-0.256129	0.117	0.173	1
Mbd2	0.010357	-0.253533	0.129	0.184	1
Phlda1	0.0325182	0.255855	0.349	0.296	1
Isg15	0.0514578	0.312574	0.338	0.285	1
Gbp2	0.0522571	0.297934	0.152	0.116	1
Ccl5	0.0544225	0.528676	0.109	0.075	1
Lpl	0.135533	0.519893	0.15	0.121	1

## Sheet: 6- vs 24-month expression
	p_val	avg_logFC	pct.1	pct.2	p_val_adj
Ttr	4.98793e-97	-0.724214	0.451	0.912	1.39652e-92
Lyz2	3.91698e-86	1.29642	0.996	0.952	1.09668e-81
Apoe	1.22435e-82	2.18292	1	0.967	3.42794e-78
B2m	9.61372e-82	0.501777	1	1	2.69165e-77
Fth1	1.72257e-76	0.540358	1	1	4.82284e-72
Crlf2	1.46569e-70	0.585995	0.955	0.722	4.10364e-66
Malat1	8.70704e-66	-0.259508	1	1	2.4378e-61
Jun	5.50273e-59	-0.33113	1	1	1.54065e-54
H2-D1	4.15223e-58	0.453537	1	0.998	1.16254e-53
Rhob	2.66131e-57	-0.303242	1	1	7.45113e-53
Itm2b	1.06956e-55	0.227308	1	1	2.99455e-51
Cd63	1.12317e-54	0.564718	0.998	0.991	3.14465e-50
Timp2	1.99544e-54	0.377986	1	0.998	5.58682e-50
Fcer1g	7.74548e-53	0.239735	1	1	2.16858e-48
Rbm39	4.85552e-43	-0.271927	0.998	1	1.35945e-38
Csf1r	1.70416e-42	-0.185263	1	1	4.7713e-38
Cd9	1.65527e-40	0.490552	1	0.998	4.63442e-36
Hspa5	1.23198e-38	-0.359154	1	1	3.4493e-34
Npc2	8.36265e-38	0.291625	1	1	2.34138e-33
Sparc	1.63004e-37	-0.195421	1	1	4.56377e-33
Cd52	2.45287e-37	0.568769	0.968	0.939	6.86754e-33
Tyrobp	2.64716e-36	0.189378	1	1	7.41153e-32
Jmjd1c	8.04514e-36	-0.318725	0.982	1	2.25248e-31
Btg2	1.07702e-35	-0.243314	1	1	3.01544e-31
Ctsz	1.45036e-35	0.275854	1	1	4.06073e-31
Ifi27l2a	1.60036e-34	0.489501	0.512	0.165	4.48068e-30
Jund	3.04255e-34	-0.212791	1	1	8.51853e-30
Cyba	6.83139e-34	0.263901	1	1	1.91265e-29
Ctss	8.68802e-34	0.252006	1	1	2.43247e-29
Ctsb	1.44851e-33	0.330935	1	1	4.05554e-29
Cx3cr1	4.80131e-32	-0.256553	1	1	1.34427e-27
C1qb	1.37566e-31	0.153259	1	1	3.85157e-27
Junb	2.15142e-30	-0.184993	1	1	6.02356e-26
Il1a	1.22574e-29	0.386042	0.99	0.976	3.43182e-25
Fosb	4.92007e-29	-0.328253	0.974	0.998	1.37752e-24
C1qa	1.19768e-28	0.216059	1	1	3.35327e-24
Ildr2	2.04843e-28	0.277708	0.524	0.211	5.73519e-24
Cst7	2.05363e-28	0.502015	0.488	0.186	5.74976e-24
Il1b	2.30409e-28	0.714193	0.674	0.373	6.45098e-24
Klf6	2.327e-28	-0.304559	0.998	1	6.51514e-24
Tnfaip2	1.09266e-27	0.423284	0.832	0.64	3.05923e-23
Rpl10	1.83833e-27	0.153228	1	1	5.14696e-23
Gm10076	3.47273e-27	0.27134	1	0.994	9.72295e-23
Cxcl16	8.22797e-27	0.369894	0.879	0.695	2.30367e-22
Ccl3	1.71602e-26	0.523509	0.996	0.98	4.80453e-22
Hspa1a	1.80096e-26	-0.465583	0.585	0.822	5.04232e-22
Gm26532	2.01132e-26	-0.345734	0.889	0.976	5.63129e-22
Bcl2a1a	3.05948e-26	0.356145	0.672	0.373	8.56594e-22
Egr1	7.20272e-26	-0.239562	1	1	2.01662e-21
Klf4	1.03508e-24	-0.390038	0.939	0.983	2.89801e-20
Prdx1	2.0566e-24	0.576958	0.953	0.89	5.75807e-20
Slc7a11	2.60178e-24	0.356633	0.346	0.092	7.28446e-20
C1qc	2.79854e-24	0.109399	1	1	7.83536e-20
Lgals3	3.56168e-24	0.739226	0.296	0.061	9.972e-20
Tmx4	5.18027e-24	-0.366842	0.889	0.956	1.45037e-19
Lgals3bp	6.77823e-24	0.37162	0.751	0.489	1.89777e-19
Col27a1	6.87731e-24	-0.281541	0.81	0.938	1.92551e-19
Tgfbr1	8.99851e-24	-0.229538	1	1	2.5194e-19
Rpl35	1.02732e-23	0.188676	1	1	2.87628e-19
Rpl15	2.14007e-23	0.249807	0.988	0.958	5.99176e-19
Marcks	3.1889e-23	-0.189289	0.994	1	8.92828e-19
Lamp1	5.34897e-23	0.193746	1	1	1.4976e-18
Spp1	1.12618e-22	1.47029	0.196	0.013	3.15307e-18
Tra2b	4.03241e-22	-0.253163	0.978	0.996	1.12899e-17
Ccnl1	6.36096e-22	-0.20607	0.996	1	1.78094e-17
Dnaja1	6.43005e-22	-0.307273	0.968	0.994	1.80028e-17
Ssh2	7.81101e-22	-0.242913	0.98	0.996	2.18693e-17
Rpl23	1.37254e-21	0.150833	1	1	3.84283e-17
Ccl4	1.74775e-21	0.482578	1	0.993	4.89336e-17
Glul	3.02904e-21	-0.216296	1	1	8.48071e-17
Axl	6.02456e-21	0.263931	0.306	0.085	1.68676e-16
Rxrg	6.57531e-21	0.128004	0.16	0.004	1.84096e-16
Cd81	6.96757e-21	0.162434	1	1	1.95078e-16
Basp1	7.13376e-21	-0.216331	0.99	1	1.99731e-16
Klf2	7.31829e-21	-0.303951	0.992	1	2.04898e-16
Nktr	1.53089e-20	-0.261252	0.925	0.974	4.28618e-16
Gpr84	1.86084e-20	0.38327	0.917	0.871	5.20998e-16
Rps18	7.28068e-20	0.137815	1	1	2.03844e-15
Nav3	7.55751e-20	-0.261315	0.848	0.949	2.11595e-15
Bst2	8.70129e-20	0.302287	0.842	0.691	2.43619e-15
Nfkbid	8.71218e-20	0.298867	0.872	0.732	2.43924e-15
Cybb	9.5022e-20	0.342546	0.237	0.046	2.66043e-15
Pfn1	9.71516e-20	0.179268	1	1	2.72005e-15
mt-Atp8	1.07784e-19	-0.26691	0.761	0.899	3.01774e-15
Srgn	1.15023e-19	0.284534	0.964	0.914	3.22041e-15
Dnajb1	1.9445e-19	-0.349223	0.864	0.949	5.44422e-15
Zfp36	2.31666e-19	-0.197362	0.998	0.998	6.48618e-15
Bcl2a1b	2.36971e-19	0.2529	0.998	0.991	6.63471e-15
Nrip1	2.90414e-19	-0.252683	0.903	0.974	8.131e-15
Hcar2	2.9204e-19	0.267321	0.419	0.169	8.17652e-15
Rpl39	4.10811e-19	0.16356	1	1	1.15019e-14
Rasgrp3	5.25306e-19	-0.244579	0.893	0.965	1.47075e-14
Ier5	1.75189e-18	-0.177178	1	1	4.90495e-14
Rpl3	1.94924e-18	0.135196	1	1	5.45748e-14
Anxa5	2.01708e-18	0.340315	0.615	0.386	5.64743e-14
Rpl9	2.09027e-18	0.142251	1	1	5.85235e-14
Akap13	2.36914e-18	-0.227262	0.968	0.983	6.63313e-14
Hpgd	2.50313e-18	-0.239718	0.939	0.98	7.00827e-14
Ifitm3	4.07135e-18	0.350689	0.431	0.195	1.1399e-13
Slfn2	5.25398e-18	0.299517	0.757	0.561	1.47101e-13
Tnpo3	7.50851e-18	-0.264991	0.868	0.947	2.10223e-13
Hk2	7.89632e-18	-0.247467	0.951	0.987	2.21081e-13
Il6ra	1.90998e-17	-0.216704	0.97	0.982	5.34757e-13
Rplp0	3.41871e-17	0.119811	1	1	9.57171e-13
Txnip	3.65383e-17	-0.248549	0.933	0.982	1.023e-12
Bcl2a1d	4.97079e-17	0.224471	0.421	0.193	1.39172e-12
Rpl13	4.99895e-17	0.106328	1	1	1.3996e-12
Ifi27	5.64581e-17	0.262215	0.85	0.715	1.58071e-12
Tsc22d3	5.71005e-17	-0.254569	0.86	0.949	1.5987e-12
Srgap2	5.77501e-17	-0.199952	0.984	0.989	1.61689e-12
Uba52	8.43962e-17	0.232146	0.84	0.656	2.36292e-12
Zbtb7a	1.09356e-16	-0.224286	0.927	0.971	3.06175e-12
Eef1a1	1.17051e-16	0.1171	1	1	3.27719e-12
Usp2	1.27625e-16	-0.228371	0.868	0.947	3.57325e-12
Rab7b	1.3048e-16	0.14885	0.16	0.017	3.65318e-12
Rpl10a	1.47388e-16	0.148135	1	1	4.12657e-12
Rps6	1.69184e-16	0.11759	1	1	4.73681e-12
Maf	1.69914e-16	-0.221893	0.935	0.978	4.75726e-12
Rps7	1.7976e-16	0.13775	1	1	5.03291e-12
Rpl19	2.12045e-16	0.12532	1	1	5.93684e-12
Atf3	2.763e-16	-0.169759	1	1	7.73586e-12
Mageh1	4.2323e-16	0.102642	0.168	0.022	1.18496e-11
Cd83	6.09696e-16	0.178639	1	1	1.70703e-11
Fgd2	6.6458e-16	-0.20582	0.933	0.967	1.86069e-11
Arid4a	6.8352e-16	-0.243713	0.725	0.866	1.91372e-11
Rps2	6.8908e-16	0.144366	1	1	1.92929e-11
Golm1	8.12996e-16	-0.198511	0.982	0.998	2.27623e-11
Fcrls	1.21844e-15	-0.163052	1	1	3.41139e-11
Son	1.39399e-15	-0.163965	1	1	3.90289e-11
Frmd4a	1.41004e-15	-0.206951	0.933	0.985	3.94784e-11
Mycbp2	1.5274e-15	-0.18559	0.97	0.996	4.27642e-11
Ctsl	1.74253e-15	0.286753	0.998	1	4.87874e-11
Serinc3	2.05641e-15	-0.183248	0.988	0.998	5.75753e-11
Fcgr3	2.16571e-15	0.177049	1	1	6.06356e-11
Rgs7bp	2.71344e-15	-0.121629	0.03	0.186	7.5971e-11
Hebp1	2.99843e-15	0.235979	0.684	0.463	8.395e-11
Kctd12	4.60919e-15	-0.177881	1	1	1.29048e-10
Ly9	5.30294e-15	0.1665	0.296	0.101	1.48472e-10
Dock10	5.423e-15	-0.221508	0.872	0.96	1.51833e-10
H2-K1	5.52973e-15	0.213133	0.998	0.985	1.54821e-10
Ifi204	6.14853e-15	0.204692	0.314	0.114	1.72147e-10
Arid1a	6.36469e-15	-0.223393	0.858	0.936	1.78198e-10
Mef2c	6.93125e-15	-0.155237	1	1	1.94061e-10
Dusp6	8.0129e-15	-0.250091	0.923	0.98	2.24345e-10
Kmt2e	1.14522e-14	-0.203639	0.915	0.958	3.20639e-10
Chd2	1.16899e-14	-0.219328	0.822	0.921	3.27294e-10
Klhdc8b	1.18278e-14	-0.201218	0.32	0.537	3.31155e-10
Plxdc2	1.63391e-14	-0.178728	0.986	1	4.57461e-10
Slco2b1	1.79208e-14	-0.195124	0.945	0.982	5.01747e-10
Smap2	1.79305e-14	-0.170762	0.99	0.998	5.02018e-10
Mertk	1.84401e-14	-0.210903	0.949	0.983	5.16285e-10
Clk1	1.85114e-14	-0.196001	0.966	0.985	5.18282e-10
Arsb	1.94491e-14	-0.228167	0.684	0.831	5.44535e-10
Nuak1	2.05748e-14	-0.219281	0.658	0.82	5.76054e-10
Psmb8	2.19623e-14	0.200384	0.986	0.936	6.149e-10
Acox3	2.33165e-14	-0.239825	0.66	0.82	6.52814e-10
Pou2f2	3.66918e-14	-0.19844	0.972	0.996	1.0273e-09
Csf1	3.98429e-14	0.325779	0.571	0.375	1.11552e-09
Aldoa	4.51699e-14	0.317569	0.941	0.928	1.26467e-09
Map4k4	5.34603e-14	-0.20125	0.836	0.914	1.49678e-09
Upf2	5.46362e-14	-0.202119	0.411	0.621	1.5297e-09
Hes1	6.16914e-14	-0.262409	0.82	0.881	1.72723e-09
Srrm2	6.36899e-14	-0.15918	1	1	1.78319e-09
Rps19	8.98912e-14	0.120913	1	1	2.51677e-09
Nmt1	9.5349e-14	-0.205043	0.901	0.958	2.66958e-09
Capg	9.62337e-14	0.421508	0.534	0.336	2.69435e-09
Ankrd11	9.73197e-14	-0.201438	0.907	0.974	2.72476e-09
Brd2	1.38921e-13	-0.20534	0.935	0.965	3.88951e-09
Itgam	1.50331e-13	-0.188761	0.992	1	4.20898e-09
Ly6e	1.52336e-13	0.188535	1	1	4.26511e-09
Adap2	1.78435e-13	-0.207234	0.929	0.974	4.99584e-09
Akr1a1	1.97461e-13	0.199061	0.988	0.976	5.5285e-09
Rrbp1	1.97954e-13	-0.140978	1	1	5.54232e-09
Ddit3	2.36298e-13	-0.217959	0.747	0.869	6.61588e-09
Cd68	2.77944e-13	0.243948	0.99	0.987	7.78188e-09
Rps4x	3.3978e-13	0.110426	1	1	9.51317e-09
Gpr183	3.43789e-13	-0.203466	0.814	0.901	9.62539e-09
mt-Co3	3.77158e-13	0.141137	1	1	1.05597e-08
Gltp	3.78171e-13	0.209636	0.901	0.807	1.0588e-08
Fam20c	6.81348e-13	0.184667	0.202	0.055	1.90764e-08
Rpl32	7.29156e-13	0.109861	1	1	2.04149e-08
Dhx9	7.57111e-13	-0.210495	0.628	0.77	2.11976e-08
Rasgef1b	1.12314e-12	0.231388	0.83	0.676	3.14456e-08
Nr4a1	1.15174e-12	0.282012	0.636	0.46	3.22465e-08
Arhgdib	1.20509e-12	0.182002	0.964	0.928	3.37402e-08
Fxyd5	1.30491e-12	0.195531	0.253	0.092	3.65348e-08
Mif	1.32507e-12	0.288787	0.885	0.79	3.70992e-08
Rpl36a	1.8753e-12	0.139234	1	1	5.25045e-08
Cd14	2.04628e-12	0.362146	0.968	0.96	5.72918e-08
Glipr1	2.06499e-12	0.19767	0.332	0.151	5.78156e-08
Tspo	2.11313e-12	0.240045	0.828	0.686	5.91633e-08
Lag3	2.37472e-12	0.19452	0.99	0.989	6.64874e-08
Sall1	2.39186e-12	-0.195469	0.806	0.912	6.69674e-08
Elmo1	2.40295e-12	-0.178653	0.951	0.983	6.72779e-08
Vcam1	2.45146e-12	0.238098	0.457	0.263	6.8636e-08
Wasf2	2.7011e-12	-0.160466	0.988	0.998	7.56254e-08
Cotl1	2.85077e-12	0.197566	1	0.994	7.9816e-08
Mef2a	2.85918e-12	-0.157503	0.986	0.998	8.00512e-08
mt-Nd2	3.22438e-12	-0.141506	1	1	9.02763e-08
Rsrc2	3.27495e-12	-0.19085	0.911	0.954	9.16921e-08
Itga6	3.65944e-12	-0.190922	0.767	0.877	1.02457e-07
Zfp292	3.92735e-12	-0.212916	0.775	0.866	1.09958e-07
Cox6a2	4.19582e-12	0.153455	0.233	0.079	1.17474e-07
Lsp1	4.24764e-12	0.218924	0.656	0.456	1.18926e-07
Zeb2	5.55306e-12	-0.169471	0.994	0.994	1.55475e-07
Ltc4s	5.91197e-12	-0.152909	0.99	0.998	1.65523e-07
Plekho1	6.35014e-12	-0.169877	0.931	0.98	1.77791e-07
Rhoh	6.85156e-12	-0.18226	0.984	0.993	1.9183e-07
Tmsb10	7.27522e-12	0.251528	0.885	0.8	2.03692e-07
Acin1	1.01727e-11	-0.173385	0.866	0.936	2.84815e-07
Ly86	1.09885e-11	0.175752	1	0.998	3.07656e-07
Itgax	1.10309e-11	0.144795	0.176	0.046	3.08843e-07
Rpl14	1.14396e-11	0.105881	1	1	3.20287e-07
Ikzf1	1.24921e-11	-0.186257	0.814	0.923	3.49755e-07
Srsf11	1.29561e-11	-0.175019	0.921	0.941	3.62745e-07
H2-Q7	1.29875e-11	0.163974	0.455	0.259	3.63623e-07
Atp6v1g1	1.33752e-11	0.143649	0.998	0.998	3.74478e-07
Tanc2	1.35525e-11	-0.182407	0.941	0.983	3.79442e-07
Pag1	1.44419e-11	-0.201488	0.858	0.928	4.04344e-07
Epb41l2	1.59229e-11	-0.167535	0.988	1	4.45809e-07
Qk	2.11469e-11	-0.155586	0.98	0.994	5.92072e-07
Gapdh	2.25402e-11	0.208435	0.996	0.985	6.31079e-07
Smim3	3.03574e-11	0.181361	0.603	0.406	8.49946e-07
Prpf4b	3.05809e-11	-0.186892	0.759	0.869	8.56205e-07
Csf2ra	3.13534e-11	0.221443	0.753	0.575	8.77832e-07
Inpp5d	3.56098e-11	-0.162474	0.976	0.993	9.97004e-07
Psap	3.83052e-11	0.133273	1	1	1.07247e-06
Git2	4.03056e-11	-0.171977	0.941	0.974	1.12848e-06
Bclaf1	4.15999e-11	-0.194238	0.747	0.855	1.16471e-06
Shisa5	4.38728e-11	0.185728	0.889	0.781	1.22835e-06
Trem2	4.47986e-11	0.107476	1	1	1.25427e-06
Gm10116	4.55421e-11	0.200541	0.836	0.715	1.27509e-06
Btf3	4.64526e-11	0.178809	0.994	0.987	1.30058e-06
Tmsb4x	4.79339e-11	0.102805	1	1	1.34205e-06
Mxd4	5.01965e-11	-0.201005	0.516	0.678	1.4054e-06
Xbp1	5.10321e-11	-0.179662	0.899	0.923	1.4288e-06
Sp100	5.66068e-11	0.118271	0.241	0.09	1.58488e-06
Rpl4	6.35094e-11	0.103701	1	1	1.77814e-06
Prdx5	8.34963e-11	0.163013	0.978	0.965	2.33773e-06
Gtpbp2	8.39453e-11	-0.17817	0.555	0.695	2.3503e-06
Clic4	8.7938e-11	0.194221	0.383	0.21	2.46209e-06
Cd74	9.38582e-11	0.285573	0.753	0.621	2.62784e-06
Cggbp1	1.07302e-10	-0.194426	0.755	0.846	3.00425e-06
Rsbn1l	1.09168e-10	-0.183406	0.739	0.831	3.05649e-06
Pde3b	1.31592e-10	-0.162601	0.915	0.963	3.68431e-06
Crip1	1.32407e-10	0.312523	0.415	0.248	3.70712e-06
Cbfa2t3	1.53338e-10	-0.184132	0.5	0.66	4.29316e-06
Top1	1.53447e-10	-0.180111	0.907	0.95	4.2962e-06
Cxcl14	1.6062e-10	0.159766	0.136	0.029	4.49704e-06
Upk1b	1.60933e-10	0.188559	0.69	0.548	4.50581e-06
Cd72	1.65924e-10	0.170817	0.211	0.075	4.64555e-06
Naalad2	1.68092e-10	0.162909	0.415	0.23	4.70625e-06
Fabp5	1.7919e-10	0.321966	0.202	0.072	5.01696e-06
Tmem55b	1.87905e-10	-0.175897	0.854	0.923	5.26097e-06
Map3k8	2.09403e-10	-0.202281	0.804	0.886	5.86288e-06
AI607873	2.10983e-10	0.144191	0.239	0.092	5.90711e-06
Rpl24	2.42705e-10	0.112371	1	1	6.79525e-06
Anxa3	2.56272e-10	0.141583	1	0.998	7.17509e-06
Herpud1	2.69107e-10	-0.18507	0.978	0.989	7.53446e-06
Ms4a6d	2.77228e-10	0.188851	0.658	0.465	7.76182e-06
Lilrb4a	2.77591e-10	0.23112	0.263	0.119	7.772e-06
Plaur	2.95721e-10	0.157194	0.383	0.208	8.27961e-06
Hsph1	3.73867e-10	-0.153864	0.285	0.456	1.04675e-05
Mir155hg	4.21777e-10	0.133387	0.243	0.099	1.18089e-05
Slamf9	4.64372e-10	0.18302	0.63	0.434	1.30015e-05
Fos	4.70549e-10	-0.138601	0.998	1	1.31744e-05
Cltc	4.7163e-10	-0.158512	0.964	0.983	1.32047e-05
Ktn1	4.85395e-10	-0.176576	0.806	0.864	1.35901e-05
Bptf	5.5923e-10	-0.172855	0.834	0.914	1.56573e-05
Tjp1	5.67445e-10	-0.178902	0.739	0.847	1.58873e-05
Slmap	5.89782e-10	-0.170615	0.715	0.824	1.65127e-05
Cd48	5.91963e-10	0.214328	0.532	0.371	1.65738e-05
Rgs1	6.06655e-10	-0.245996	0.587	0.754	1.69851e-05
Hpgds	6.14585e-10	-0.127282	1	1	1.72071e-05
Zfhx3	7.30761e-10	-0.159345	0.988	0.996	2.04599e-05
Snta1	9.1198e-10	-0.175107	0.678	0.805	2.55336e-05
Zfp36l1	9.83177e-10	-0.154959	0.994	0.991	2.7527e-05
Ddit4	9.94686e-10	-0.107187	0.077	0.206	2.78492e-05
Rpl37a	1.03426e-09	0.103049	1	1	2.89572e-05
Tsc22d4	1.04402e-09	-0.147019	0.953	0.993	2.92306e-05
Fmnl3	1.10069e-09	-0.157838	0.652	0.754	3.08171e-05
Ehd1	1.2008e-09	0.137066	0.3	0.149	3.36199e-05
Purb	1.21753e-09	-0.165008	0.779	0.851	3.40883e-05
Fam102b	1.36109e-09	-0.168028	0.877	0.943	3.81079e-05
Zfp652	1.36852e-09	-0.176423	0.63	0.785	3.83158e-05
Ankrd44	1.39153e-09	-0.194071	0.777	0.877	3.896e-05
Rpl7a	1.55833e-09	0.120233	0.998	0.998	4.36301e-05
H2-Q6	1.65581e-09	0.15665	0.427	0.261	4.63594e-05
Ppp1r10	1.75492e-09	-0.177411	0.852	0.904	4.91342e-05
Siglech	2.1593e-09	-0.126169	0.996	1	6.04561e-05
Zfp36l2	2.1911e-09	-0.182981	0.901	0.956	6.13465e-05
Ddx3x	2.20171e-09	-0.164203	0.962	0.987	6.16434e-05
Pdcd1	2.22784e-09	0.101528	0.154	0.044	6.23751e-05
Lpl	2.23229e-09	0.60113	0.259	0.121	6.24997e-05
Tra2a	2.29919e-09	-0.175943	0.844	0.925	6.43728e-05
Kmt2a	2.67099e-09	-0.166438	0.623	0.765	7.47825e-05
Capns1	2.75018e-09	0.151507	0.907	0.842	7.69995e-05
Banp	2.83094e-09	-0.138802	0.233	0.395	7.92605e-05
Kat6a	2.90942e-09	-0.148347	0.664	0.812	8.1458e-05
Osbpl11	2.93389e-09	-0.157557	0.51	0.642	8.2143e-05
Pkn2	2.93537e-09	-0.162772	0.715	0.814	8.21845e-05
Cysltr1	3.06656e-09	-0.16424	0.585	0.726	8.58575e-05
Rhobtb1	3.20442e-09	-0.143854	0.356	0.529	8.97174e-05
Phf11b	3.4848e-09	0.120681	0.241	0.103	9.75673e-05
Phip	3.74838e-09	-0.176016	0.63	0.724	0.000104947
Pip4k2a	4.01018e-09	-0.147737	0.887	0.93	0.000112277
Mapk14	4.02635e-09	-0.152971	0.545	0.691	0.00011273
Tmem119	4.81643e-09	-0.113941	0.998	1	0.00013485
Col6a3	4.99685e-09	0.102972	0.225	0.094	0.000139902
9930111J21Rik2	5.33498e-09	-0.155176	0.731	0.853	0.000149369
Snrnp70	5.84637e-09	-0.15891	0.789	0.866	0.000163687
Tm6sf1	5.88885e-09	-0.157915	0.763	0.868	0.000164876
Arhgap5	6.0316e-09	-0.137414	0.978	0.993	0.000168873
Ythdc1	6.49781e-09	-0.16674	0.733	0.836	0.000181926
Rpl38	6.65157e-09	0.123111	1	0.998	0.000186231
Mllt4	6.71043e-09	0.114791	0.279	0.134	0.000187879
Cbl	7.82716e-09	-0.165343	0.751	0.824	0.000219145
Tnf	8.14049e-09	0.262321	0.941	0.921	0.000227917
Rlim	8.34484e-09	-0.148375	0.826	0.906	0.000233639
Cstb	8.53726e-09	0.283853	0.826	0.746	0.000239026
Pkm	9.62632e-09	0.251247	0.98	0.958	0.000269518
Tab2	9.62999e-09	-0.160564	0.798	0.881	0.000269621
Clip1	9.881e-09	-0.146738	0.895	0.95	0.000276648
Ash1l	1.03992e-08	-0.168736	0.824	0.908	0.000291157
mt-Nd3	1.09446e-08	-0.164757	0.846	0.897	0.000306427
Bcl10	1.13201e-08	-0.169642	0.832	0.901	0.000316941
Ndufa4	1.13688e-08	0.155486	0.957	0.928	0.000318302
Arl5c	1.15514e-08	0.212449	0.69	0.572	0.000323417
Arhgap39	1.23818e-08	-0.15435	0.48	0.61	0.000346667
Mfng	1.2467e-08	-0.160657	0.779	0.851	0.000349052
Tpi1	1.25594e-08	0.218738	0.729	0.612	0.000351637
Aif1	1.26399e-08	0.107834	1	1	0.000353892
Trim47	1.38608e-08	-0.161738	0.7	0.796	0.000388075
Rnf149	1.4603e-08	0.198725	0.771	0.682	0.000408854
Eif4g2	1.46091e-08	-0.138768	0.984	0.994	0.000409025
Ppp1r15a	1.48497e-08	-0.132868	0.99	1	0.000415763
Gabarap	1.55847e-08	0.130433	0.996	0.989	0.00043634
Nfic	1.64895e-08	-0.151997	0.81	0.917	0.000461672
Pgam1	1.68585e-08	0.214556	0.761	0.631	0.000472005
Btaf1	1.84187e-08	-0.155701	0.439	0.588	0.000515686
Apoa1bp	1.86417e-08	0.135641	0.682	0.528	0.00052193
Macf1	1.86466e-08	-0.123098	0.99	0.993	0.000522068
Tnrc6b	1.88679e-08	-0.170098	0.751	0.82	0.000528263
Dusp1	1.88947e-08	-0.142034	1	1	0.000529013
AI504432	1.93204e-08	0.105852	0.196	0.077	0.000540932
Filip1l	2.22018e-08	-0.161706	0.731	0.836	0.000621605
Tmf1	2.47786e-08	-0.160381	0.781	0.882	0.000693753
Atp6v0e	2.66568e-08	0.151218	0.98	0.963	0.000746336
Phf3	2.70823e-08	-0.158312	0.7	0.816	0.000758251
Hp1bp3	2.89728e-08	-0.153384	0.891	0.928	0.000811179
Arhgef6	2.97244e-08	-0.1466	0.474	0.627	0.000832224
Vim	2.98764e-08	0.279564	0.2	0.086	0.000836481
Cttnbp2nl	3.14698e-08	-0.137517	0.962	0.982	0.000881091
Smim14	3.16438e-08	0.152583	0.872	0.772	0.000885964
Neurl1a	3.17835e-08	-0.123208	0.186	0.324	0.000889876
Chst1	3.40666e-08	0.145401	0.425	0.274	0.000953797
Ckb	3.42339e-08	-0.115411	1	1	0.000958481
Sh3bgrl3	3.45788e-08	0.136865	1	1	0.000968137
Mgll	3.55634e-08	-0.144794	0.621	0.757	0.000995705
Cln8	3.69898e-08	-0.158962	0.709	0.82	0.00103564
Csmd3	4.67102e-08	-0.172665	0.662	0.754	0.00130779
Cebpg	5.28451e-08	-0.133312	0.939	0.963	0.00147956
H2-DMa	5.38438e-08	0.140143	0.953	0.91	0.00150752
Adrbk1	5.49549e-08	-0.166701	0.65	0.763	0.00153863
Hexa	6.22779e-08	0.111886	1	0.998	0.00174366
N4bp2l1	7.04598e-08	-0.127946	0.417	0.575	0.00197273
Picalm	7.12062e-08	-0.136647	0.97	0.994	0.00199363
Per1	7.19004e-08	-0.169085	0.64	0.746	0.00201307
Tnrc6a	7.43436e-08	-0.150575	0.676	0.772	0.00208147
Selplg	8.12414e-08	-0.103462	1	1	0.0022746
Pafah1b1	8.46151e-08	-0.142693	0.978	0.991	0.00236905
Cox5b	8.80683e-08	0.152219	0.933	0.853	0.00246573
C5ar1	8.84682e-08	0.196463	0.844	0.778	0.00247693
Tlr2	9.1855e-08	0.209541	0.812	0.737	0.00257176
Msl1	9.60279e-08	-0.148997	0.672	0.781	0.00268859
Asap1	9.87596e-08	-0.144892	0.879	0.897	0.00276507
Igsf6	9.87693e-08	0.163466	0.591	0.456	0.00276534
AW112010	1.01977e-07	0.135745	0.33	0.191	0.00285515
Ep300	1.03345e-07	-0.160814	0.632	0.732	0.00289346
Laptm4a	1.07251e-07	0.150395	0.98	0.95	0.0030028
Ppp1r9a	1.1159e-07	-0.145662	0.715	0.814	0.00312431
Wnk1	1.18542e-07	-0.130063	0.99	1	0.00331893
Arhgap30	1.2063e-07	-0.170741	0.83	0.89	0.00337741
Cbx3	1.21808e-07	-0.130853	0.403	0.548	0.00341037
BC017643	1.24665e-07	-0.141878	0.506	0.662	0.00349037
Cox6b1	1.26579e-07	0.139706	0.988	0.971	0.00354396
Atp5c1	1.34483e-07	0.142297	0.931	0.895	0.00376525
Creg1	1.36637e-07	0.126311	0.996	0.993	0.00382557
Tpd52	1.37881e-07	0.1659	0.844	0.752	0.00386039
Phf14	1.40557e-07	-0.149276	0.775	0.842	0.00393532
Il10ra	1.41214e-07	-0.145396	0.895	0.949	0.00395371
Ubn2	1.51934e-07	-0.152841	0.581	0.719	0.00425385
Tubgcp5	1.55724e-07	-0.148192	0.52	0.664	0.00435996
2021-03-01	1.6093e-07	-0.135154	0.613	0.732	0.00450571
Csnk1e	1.61871e-07	-0.137684	0.951	0.978	0.00453207
Rel	1.63608e-07	-0.139184	0.986	0.991	0.00458071
Rapgef5	1.72199e-07	-0.157147	0.522	0.654	0.00482123
Ptgs1	1.84451e-07	-0.117199	0.99	0.998	0.00516427
Arglu1	1.91293e-07	-0.132964	0.866	0.901	0.00535583
Acot9	2.00274e-07	0.107519	0.231	0.114	0.00560727
Stat3	2.16492e-07	-0.149867	0.947	0.969	0.00606134
Hsp90aa1	2.19738e-07	-0.163861	0.992	0.996	0.00615224
Adrb1	2.21469e-07	-0.11695	0.229	0.369	0.00620068
Dusp7	2.21696e-07	-0.140324	0.381	0.502	0.00620705
Nceh1	2.22046e-07	0.107968	0.211	0.097	0.00621685
Mtss1	2.29531e-07	-0.132214	0.54	0.676	0.0064264
F11r	2.3086e-07	-0.117608	0.976	0.991	0.00646361
Kansl1	2.38799e-07	-0.140674	0.628	0.757	0.00668591
Zcchc6	2.4047e-07	-0.155904	0.785	0.882	0.00673267
Bin1	2.45119e-07	-0.105725	0.998	1	0.00686283
mt-Nd1	2.61508e-07	0.14103	1	1	0.00732171
Eef1g	2.7863e-07	0.132513	0.988	0.98	0.00780108
Psme1	2.87462e-07	0.153748	0.895	0.847	0.00804837
Ssr4	2.87696e-07	0.131535	0.994	0.996	0.00805492
Tnfsf13b	2.91691e-07	0.146804	0.425	0.287	0.00816677
Mafg	3.24598e-07	-0.136145	0.949	0.958	0.0090881
Gm10138	3.34991e-07	-0.166682	0.536	0.658	0.00937908
Eif5	3.36821e-07	-0.123943	0.988	1	0.00943031
Commd4	3.56433e-07	0.133921	0.644	0.506	0.0099794
Pdcd4	3.62833e-07	-0.153223	0.468	0.605	0.0101586
Glmp	3.68697e-07	0.162969	0.81	0.726	0.0103228
Emsy	3.73376e-07	-0.132488	0.332	0.461	0.0104538
Zc3h13	3.86676e-07	-0.15359	0.607	0.717	0.0108261
Rreb1	4.09879e-07	-0.145091	0.451	0.585	0.0114758
Sf3b1	4.11068e-07	-0.122988	0.978	0.991	0.0115091
Nsun6	4.14215e-07	-0.143469	0.381	0.506	0.0115972
Pld3	4.29672e-07	0.219111	0.765	0.684	0.01203
Cox6a1	4.40815e-07	0.123321	0.968	0.954	0.0123419
Rapgef6	4.43715e-07	-0.156365	0.567	0.676	0.0124231
Ophn1	4.4399e-07	-0.143623	0.866	0.912	0.0124308
Wdr26	4.54651e-07	-0.147062	0.796	0.849	0.0127293
Cd274	4.66049e-07	0.116688	0.233	0.116	0.0130484
Nr3c1	4.92066e-07	-0.138885	0.919	0.958	0.0137769
Tgs1	5.5644e-07	-0.158182	0.796	0.877	0.0155792
Arid5a	5.56748e-07	-0.1585	0.664	0.772	0.0155878
2810474O19Rik	5.70263e-07	-0.150569	0.781	0.831	0.0159662
Pfkfb3	5.98566e-07	0.152784	0.759	0.66	0.0167586
Usp34	6.12261e-07	-0.133452	0.684	0.783	0.0171421
Lpin2	6.5041e-07	-0.148008	0.816	0.877	0.0182102
Dst	6.60947e-07	-0.135064	0.953	0.95	0.0185052
Ms4a6c	7.4284e-07	0.134207	0.443	0.307	0.020798
Psme2	7.4525e-07	0.123006	0.885	0.8	0.0208655
Slc40a1	7.51153e-07	-0.14025	0.514	0.634	0.0210308
Nipbl	7.75356e-07	-0.137123	0.883	0.923	0.0217084
Wbp11	8.06647e-07	-0.142239	0.646	0.735	0.0225845
Celf1	9.3108e-07	-0.143106	0.694	0.77	0.0260684
Cdc42se1	9.53608e-07	-0.137646	0.676	0.789	0.0266991
Ykt6	9.93577e-07	-0.126233	0.496	0.603	0.0278182
Sdf4	1.02264e-06	0.141942	0.947	0.895	0.0286318
Dusp11	1.03782e-06	-0.142151	0.676	0.772	0.0290568
Lrrc25	1.04195e-06	0.142889	0.621	0.511	0.0291726
B4galt3	1.07132e-06	-0.136317	0.472	0.592	0.0299947
Npm1	1.07448e-06	0.116019	0.998	0.996	0.0300834
2021-09-15	1.09726e-06	0.124636	0.976	0.954	0.030721
Wfdc17	1.17087e-06	0.122834	0.18	0.081	0.0327821
Uqcrh	1.17159e-06	0.112138	0.994	0.985	0.0328023
D15Ertd621e	1.1771e-06	-0.140057	0.729	0.822	0.0329566
Atf4	1.18327e-06	-0.137807	0.929	0.958	0.0331291
Hist1h1e	1.23395e-06	-0.154645	0.607	0.726	0.034548
Zfp710	1.24972e-06	-0.136872	0.591	0.711	0.0349896
Scoc	1.25072e-06	-0.123404	0.98	0.993	0.0350177
Dtx4	1.26646e-06	-0.144315	0.611	0.719	0.0354583
Rpl5	1.27316e-06	0.104483	1	1	0.035646
Susd3	1.27696e-06	-0.130469	0.923	0.961	0.0357524
Adrb2	1.29894e-06	-0.142821	0.86	0.93	0.0363678
H2-DMb1	1.30682e-06	0.138826	0.877	0.79	0.0365884
Mbnl1	1.31831e-06	-0.120178	0.972	0.987	0.0369101
Cxcl2	1.33722e-06	0.512786	0.393	0.267	0.0374395
Pde2a	1.34018e-06	0.143032	0.5	0.355	0.0375223
Pald1	1.38777e-06	-0.142603	0.7	0.801	0.0388549
Rock2	1.54793e-06	-0.132323	0.83	0.888	0.0433388
Tcf4	1.57665e-06	-0.146703	0.899	0.936	0.044143
Chka	1.58855e-06	-0.179513	0.66	0.779	0.0444764
Nos1ap	1.6145e-06	-0.116395	0.31	0.438	0.0452027
Arhgap17	1.63977e-06	-0.142104	0.731	0.835	0.0459103
Tgm2	1.66029e-06	0.147275	0.777	0.68	0.0464849
Rtp4	1.68049e-06	0.104795	0.211	0.103	0.0470504
Ndufb8	1.68465e-06	0.137858	0.887	0.824	0.0471667
Zfp706	1.70245e-06	-0.112582	0.978	0.98	0.0476651
Fam76b	1.72991e-06	-0.120143	0.326	0.461	0.048434
Mtdh	1.73904e-06	-0.104767	1	1	0.0486896
Tmem204	1.78729e-06	-0.114145	0.255	0.386	0.0500404
Kcnk12	1.87054e-06	-0.110722	0.231	0.353	0.0523712
Itm2c	1.95853e-06	0.116713	0.998	1	0.0548348
Taldo1	1.9605e-06	0.171376	0.883	0.844	0.05489
Ccl6	1.97232e-06	0.318387	0.82	0.768	0.0552209
Abl1	2.0079e-06	-0.122185	0.561	0.689	0.0562173
Kbtbd2	2.03396e-06	-0.121282	0.415	0.539	0.0569469
Osm	2.10123e-06	0.187818	0.583	0.482	0.0588303
Adap2os	2.1228e-06	-0.156616	0.587	0.689	0.0594342
Lat2	2.22072e-06	0.149273	0.856	0.811	0.0621756
Pgs1	2.24682e-06	-0.124089	0.368	0.474	0.0629065
mt-Cytb	2.25229e-06	0.101188	1	1	0.0630597
Tpr	2.26752e-06	-0.124014	0.966	0.969	0.0634859
Neurl3	2.36182e-06	-0.12654	0.883	0.915	0.0661261
Ctc1	2.52586e-06	-0.125745	0.8	0.877	0.0707191
Gnaq	2.53426e-06	-0.1462	0.628	0.688	0.0709541
Stard3	2.56004e-06	-0.127961	0.789	0.855	0.0716759
Thoc2	2.56297e-06	-0.134226	0.745	0.838	0.0717581
Setd2	2.60469e-06	-0.131271	0.658	0.754	0.072926
Ppp4r2	2.67086e-06	-0.125024	0.547	0.676	0.0747787
Cir1	2.70646e-06	-0.115446	0.407	0.537	0.0757753
Tubb5	2.73472e-06	0.122998	0.994	0.958	0.0765667
Ralbp1	2.74802e-06	-0.124238	0.877	0.915	0.0769389
Mt1	2.75427e-06	-0.111534	0.951	0.971	0.0771139
Eif5b	2.76682e-06	-0.127953	0.879	0.95	0.0774654
AF251705	2.7714e-06	0.12456	0.992	0.983	0.0775937
Id2	2.86018e-06	0.224688	0.929	0.915	0.0800792
Acap2	2.87344e-06	-0.138009	0.781	0.836	0.0804507
Nfya	2.9196e-06	-0.126435	0.48	0.599	0.081743
Tpp2	2.91994e-06	-0.142624	0.65	0.741	0.0817526
Zfp207	3.24597e-06	-0.121225	0.666	0.765	0.0908807
Atxn7l3b	3.29347e-06	-0.118579	0.87	0.91	0.0922107
Cbx1	3.42e-06	-0.123974	0.777	0.866	0.0957532
Tfe3	3.76703e-06	-0.134584	0.779	0.851	0.105469
Pcf11	3.80338e-06	-0.132279	0.781	0.842	0.106487
Crebbp	3.82207e-06	-0.129362	0.684	0.796	0.10701
Cdk12	3.87599e-06	-0.121167	0.816	0.893	0.10852
Ncf2	3.96097e-06	-0.11871	0.97	0.974	0.110899
Yy1	3.97839e-06	-0.122282	0.68	0.748	0.111387
Arpc5l	4.06828e-06	-0.136237	0.711	0.796	0.113904
Spen	4.08116e-06	-0.125975	0.439	0.557	0.114264
Wdr44	4.24972e-06	-0.128078	0.49	0.608	0.118984
0610040J01Rik	4.31088e-06	-0.121346	0.773	0.853	0.120696
Ubn1	4.50511e-06	-0.124184	0.781	0.825	0.126134
Tacc1	4.51834e-06	-0.127828	0.798	0.875	0.126504
Zrsr2	4.57283e-06	-0.138024	0.646	0.721	0.12803
Herc1	4.63041e-06	-0.120064	0.589	0.684	0.129642
Siah2	4.65878e-06	-0.146774	0.439	0.544	0.130436
Samsn1	4.84336e-06	-0.133192	0.899	0.938	0.135605
Mpeg1	4.8474e-06	0.109656	0.996	1	0.135718
Hnrnpa2b1	4.90528e-06	-0.115025	0.998	0.991	0.137338
Dapp1	4.96456e-06	-0.12489	0.747	0.831	0.138998
Ctsc	5.32636e-06	0.13505	0.972	0.954	0.149127
Rsf1	5.69983e-06	-0.126507	0.658	0.737	0.159584
Mat2a	5.73624e-06	-0.129399	0.962	0.982	0.160603
Ccl5	5.84811e-06	0.111186	0.17	0.075	0.163735
B4galt6	5.886e-06	-0.121905	0.348	0.469	0.164796
Kmt2c	5.88936e-06	-0.131874	0.719	0.792	0.16489
Gm42418	6.03795e-06	0.408412	0.998	0.993	0.169051
A230046K03Rik	6.11531e-06	-0.129883	0.563	0.667	0.171216
Ndufc2	6.24464e-06	0.118821	0.943	0.89	0.174837
Sox4	6.26091e-06	-0.165325	0.838	0.899	0.175293
Tbc1d14	6.41647e-06	-0.111637	0.494	0.599	0.179648
Atp6ap1	6.56455e-06	0.142735	0.897	0.829	0.183794
Cnot4	6.5659e-06	-0.138003	0.773	0.855	0.183832
Prpf38b	6.73731e-06	-0.126802	0.897	0.952	0.188631
Rere	6.86821e-06	-0.128801	0.609	0.697	0.192296
Zfand5	6.94697e-06	-0.100428	0.992	1	0.194501
Zfp638	7.34896e-06	-0.121745	0.628	0.748	0.205756
Luc7l	7.37404e-06	-0.11424	0.324	0.445	0.206458
Wdr83os	7.43834e-06	0.12176	0.745	0.654	0.208259
Dock8	7.49157e-06	-0.12511	0.794	0.836	0.209749
Nfam1	7.6095e-06	-0.107676	0.417	0.555	0.213051
Arid5b	7.64114e-06	-0.107172	0.449	0.581	0.213937
Eml4	7.91762e-06	-0.119632	0.808	0.862	0.221678
Tmbim1	7.94025e-06	0.124369	0.5	0.375	0.222311
Fermt3	8.0985e-06	-0.131156	0.864	0.901	0.226742
Rabac1	8.17914e-06	0.10975	0.97	0.969	0.229
Spcs2	8.28967e-06	0.120111	0.976	0.938	0.232094
Trio	8.35648e-06	-0.121907	0.366	0.482	0.233965
Eng	8.38645e-06	-0.11153	0.583	0.688	0.234804
Atrx	8.42489e-06	-0.123088	0.887	0.949	0.23588
Klk8	8.61066e-06	0.133328	0.905	0.849	0.241081
Sfpq	8.65269e-06	-0.128844	0.941	0.965	0.242258
Sla	8.77265e-06	-0.123035	0.636	0.708	0.245617
Dnajb4	8.85899e-06	-0.139611	0.682	0.759	0.248034
Ube2h	8.87337e-06	-0.117392	0.597	0.686	0.248437
Cul1	8.87935e-06	-0.120736	0.794	0.847	0.248604
Ramp1	9.32477e-06	-0.106161	0.474	0.585	0.261075
Lpar6	9.33769e-06	-0.137635	0.656	0.735	0.261437
Med13l	9.38186e-06	-0.117619	0.664	0.743	0.262673
Serpine1	9.6539e-06	0.18746	0.628	0.496	0.27029
Zmynd11	9.77187e-06	-0.135578	0.617	0.728	0.273593
Ivns1abp	1.014e-05	-0.11383	0.972	0.985	0.2839
Bag1	1.04015e-05	0.118828	0.937	0.873	0.291223
Dusp18	1.06497e-05	-0.111034	0.389	0.506	0.298171
Gadd45g	1.08135e-05	-0.140946	0.362	0.487	0.302757
Snx17	1.11961e-05	-0.11226	0.879	0.917	0.313468
Pten	1.16841e-05	-0.119017	0.63	0.752	0.327131
Ddx46	1.18853e-05	-0.11122	0.522	0.669	0.332763
Wdr45b	1.18965e-05	-0.119244	0.575	0.693	0.333077
Rbm26	1.19759e-05	-0.109026	0.644	0.761	0.335301
Rpl27	1.20555e-05	0.118797	0.97	0.947	0.337531
Igbp1	1.21563e-05	0.112685	0.619	0.478	0.340353
Aff4	1.31759e-05	-0.123276	0.731	0.822	0.368899
Cyth4	1.3328e-05	-0.107971	0.988	0.991	0.373157
Fbxo33	1.34746e-05	-0.114554	0.334	0.458	0.377263
Rsrp1	1.36288e-05	-0.109946	0.937	0.972	0.38158
Dync1i2	1.40156e-05	-0.12044	0.87	0.899	0.39241
Ecscr	1.44571e-05	-0.10405	0.925	0.96	0.404769
Pid1	1.46896e-05	-0.125506	0.658	0.748	0.411279
Cebpa	1.49181e-05	-0.117376	0.949	0.972	0.417678
Irf5	1.49296e-05	-0.125463	0.909	0.936	0.417999
Rbm5	1.49586e-05	-0.109715	0.81	0.871	0.41881
Socs3	1.50111e-05	-0.111572	0.996	1	0.42028
H2-M3	1.54613e-05	0.110055	0.421	0.292	0.432887
Ptms	1.55456e-05	0.113541	0.97	0.947	0.435245
Rbm25	1.59252e-05	-0.112482	0.974	0.983	0.445874
Myl6	1.68379e-05	0.113526	0.982	0.971	0.471427
Vav2	1.76526e-05	-0.112427	0.433	0.553	0.494238
Rab35	1.80941e-05	-0.103988	0.621	0.733	0.506599
Trim44	1.92562e-05	-0.10747	0.407	0.515	0.539134
Uhrf2	1.94482e-05	-0.113628	0.478	0.592	0.54451
Prrc2c	1.97948e-05	-0.107629	0.913	0.958	0.554216
Tmcc1	2.07167e-05	-0.123103	0.391	0.493	0.580027
Fer	2.07651e-05	-0.102029	0.419	0.537	0.581382
Cmas	2.09706e-05	0.119383	0.615	0.502	0.587134
Zfp715	2.13041e-05	-0.101363	0.213	0.318	0.596473
Nrp1	2.13206e-05	-0.115199	0.775	0.835	0.596934
Cflar	2.13946e-05	-0.105506	0.903	0.93	0.599005
Psmb9	2.15604e-05	0.111119	0.581	0.454	0.603649
Gnas	2.15801e-05	0.10841	1	1	0.604198
Gab2	2.22818e-05	-0.106425	0.397	0.513	0.623847
Rptor	2.26551e-05	-0.118299	0.555	0.671	0.634297
Rab20	2.27715e-05	0.136218	0.911	0.881	0.637557
Cox7a2	2.35834e-05	0.120698	0.925	0.897	0.660288
Bmyc	2.39563e-05	-0.110624	0.905	0.928	0.670729
Cacybp	2.42654e-05	-0.126073	0.684	0.759	0.679384
Rasa1	2.49767e-05	-0.120336	0.589	0.651	0.699298
Kdm5a	2.4983e-05	-0.122898	0.585	0.675	0.699473
Rpl22l1	2.51016e-05	0.119075	0.996	0.994	0.702796
Eif4g3	2.51333e-05	-0.127933	0.696	0.759	0.703683
Csk	2.52436e-05	-0.111021	0.822	0.877	0.706772
Bcl9l	2.5296e-05	-0.106389	0.32	0.438	0.708238
Cebpz	2.58171e-05	-0.120165	0.85	0.893	0.722826
Gpr155	2.58278e-05	-0.104572	0.427	0.528	0.723126
Prex1	2.61516e-05	-0.10921	0.783	0.851	0.732191
Rilpl2	2.61625e-05	0.12885	0.366	0.268	0.732498
Tbca	2.66577e-05	0.108624	0.921	0.873	0.746362
Rassf1	2.70147e-05	-0.122225	0.658	0.754	0.756357
Mras	2.72944e-05	-0.10179	0.322	0.436	0.764188
Gm2a	2.75162e-05	0.126096	0.834	0.726	0.770399
Kif21b	2.76775e-05	-0.120512	0.579	0.654	0.774916
Pwwp2a	2.86012e-05	-0.121629	0.644	0.717	0.800776
Cebpb	2.88598e-05	-0.120688	0.984	0.98	0.808017
Dgkd	2.94722e-05	-0.128956	0.559	0.638	0.825163
Snx6	3.0353e-05	-0.108268	0.818	0.873	0.849823
Smad3	3.11253e-05	-0.103787	0.302	0.412	0.871445
St3gal6	3.20399e-05	-0.10333	0.966	0.983	0.897053
Tomm7	3.37625e-05	0.108735	0.834	0.733	0.945281
Peak1	3.38367e-05	-0.120852	0.51	0.614	0.947361
Srrm1	3.39342e-05	-0.106609	0.945	0.969	0.95009
mt-Nd4l	3.40141e-05	0.133384	0.972	0.949	0.952327
Jarid2	3.42564e-05	-0.106348	0.267	0.377	0.95911
Rcsd1	3.5026e-05	-0.12071	0.911	0.938	0.980657
Ndufb9	3.56001e-05	0.10078	0.879	0.825	0.996732
2410015M20Rik	3.56128e-05	0.121544	0.885	0.825	0.997087
Tuba1a	3.57889e-05	-0.112323	0.941	0.969	1
Cd53	3.58008e-05	0.106897	0.996	0.998	1
Map3k14	3.64669e-05	-0.107167	0.415	0.524	1
Fam63b	3.73998e-05	-0.119977	0.753	0.844	1
Nudcd3	3.78464e-05	-0.11036	0.664	0.739	1
AU020206	3.80586e-05	0.117463	0.711	0.594	1
Lrp6	3.87762e-05	-0.111806	0.389	0.474	1
Madd	4.033e-05	-0.103174	0.267	0.381	1
Pum2	4.08569e-05	-0.110796	0.771	0.822	1
Atmin	4.1735e-05	-0.113443	0.457	0.55	1
Ifi30	4.2449e-05	0.139009	0.727	0.607	1
Cxxc5	4.58287e-05	-0.107189	0.941	0.978	1
Plod1	4.67397e-05	-0.111935	0.607	0.695	1
Fchsd2	4.69427e-05	-0.118675	0.717	0.798	1
Ldb1	4.75476e-05	-0.114492	0.409	0.511	1
Slc12a9	4.76403e-05	-0.11426	0.623	0.68	1
BC035044	4.83751e-05	-0.112609	0.449	0.551	1
Gm26518	4.98024e-05	-0.116901	0.377	0.487	1
Batf3	5.06355e-05	-0.108664	0.403	0.507	1
Elk3	5.07072e-05	-0.103718	0.518	0.625	1
Ttc28	5.25027e-05	-0.11776	0.723	0.796	1
Vps18	5.25452e-05	-0.113934	0.619	0.706	1
Blnk	5.31549e-05	-0.110935	0.931	0.972	1
Pim1	5.39351e-05	0.121166	0.777	0.689	1
Arhgap27	5.4049e-05	-0.103295	0.385	0.485	1
Rnf111	5.40492e-05	-0.102225	0.492	0.594	1
Casp4	5.43555e-05	-0.119603	0.913	0.947	1
Gm9843	5.47556e-05	0.107565	0.895	0.849	1
Entpd1	5.4948e-05	-0.102452	0.897	0.952	1
Ankrd12	5.66502e-05	-0.127006	0.664	0.739	1
Smg1	5.71455e-05	-0.11854	0.565	0.675	1
Etnk1	5.92297e-05	-0.109835	0.623	0.704	1
Tle4	6.27863e-05	-0.12129	0.595	0.702	1
Maf1	6.31363e-05	-0.109029	0.692	0.8	1
Senp6	6.52164e-05	-0.119264	0.787	0.858	1
Exoc5	6.52804e-05	-0.108815	0.486	0.597	1
Kcnk6	6.61302e-05	-0.114129	0.601	0.689	1
Spcs1	6.72028e-05	0.108677	0.903	0.825	1
Ppp1r21	6.84533e-05	-0.105517	0.494	0.608	1
Pla2g15	6.93507e-05	-0.105891	0.883	0.93	1
Fam168a	7.30497e-05	-0.113209	0.496	0.599	1
Psmb1	7.32452e-05	0.106813	0.943	0.917	1
Ankrd26	7.35521e-05	-0.108229	0.241	0.347	1
Tubb2a	7.40866e-05	-0.102372	0.638	0.735	1
Pkn1	7.4778e-05	-0.102289	0.617	0.702	1
Celf2	7.49439e-05	-0.102257	0.974	0.956	1
Frg1	7.70935e-05	-0.117509	0.543	0.64	1
Nhlrc3	8.04718e-05	-0.111014	0.543	0.618	1
Fcgr2b	8.07465e-05	0.108761	0.862	0.816	1
Rbbp6	8.28611e-05	-0.135843	0.757	0.822	1
Cdc40	8.37194e-05	-0.108143	0.417	0.522	1
Dpp7	8.84717e-05	0.103851	0.348	0.244	1
Fkbp5	9.05631e-05	-0.116455	0.403	0.5	1
Tcf7l2	9.08893e-05	-0.102154	0.391	0.498	1
Ddx6	9.25628e-05	-0.105801	0.848	0.892	1
Naa15	9.27388e-05	-0.114053	0.581	0.669	1
Plekha2	9.38018e-05	-0.100198	0.401	0.511	1
Mier1	9.39652e-05	-0.12479	0.706	0.767	1
Ccl12	9.55196e-05	0.213697	0.887	0.84	1
Slc7a8	9.65621e-05	-0.107662	0.721	0.785	1
Zfp62	9.66248e-05	-0.107547	0.607	0.691	1
Sdhb	9.68992e-05	0.100185	0.85	0.768	1
Arid3b	9.81989e-05	-0.103876	0.37	0.461	1
Chd9	9.86365e-05	-0.11966	0.761	0.809	1
Rps6ka1	0.000107802	-0.122349	0.854	0.928	1
Gpatch8	0.000107964	-0.105481	0.449	0.553	1
Zfp839	0.000108193	-0.101969	0.275	0.379	1
Tec	0.000108236	-0.107466	0.253	0.346	1
Safb	0.000114077	-0.112644	0.543	0.638	1
Zcchc11	0.000115282	-0.113713	0.551	0.651	1
Gna15	0.000118107	-0.105594	0.887	0.926	1
Stx16	0.000118681	-0.100019	0.658	0.744	1
Atp5j2	0.000118897	0.109284	0.933	0.901	1
Arid4b	0.000119794	-0.12053	0.634	0.722	1
Numb	0.000121714	-0.113943	0.621	0.7	1
Pds5a	0.000122938	-0.109206	0.47	0.575	1
Akna	0.000125084	-0.112986	0.451	0.546	1
Rexo1	0.000125315	-0.101354	0.644	0.732	1
Mtch1	0.00012533	-0.109596	0.763	0.794	1
Atxn2l	0.000126173	-0.105589	0.502	0.594	1
Myl12b	0.00012631	0.112636	0.828	0.733	1
Ggh	0.000128066	0.109268	0.583	0.463	1
Eif3m	0.000130246	0.103175	0.791	0.728	1
Txlna	0.000131984	-0.108974	0.585	0.66	1
Flcn	0.000133966	-0.103987	0.478	0.557	1
Gtf2i	0.000134515	-0.108535	0.583	0.667	1
Atp5g2	0.000136845	0.103968	0.988	0.965	1
Tob2	0.000139643	-0.112232	0.87	0.906	1
Akirin2	0.000146331	-0.10062	0.864	0.895	1
Rbm27	0.000146881	-0.102859	0.514	0.605	1
Ets1	0.00015105	-0.108959	0.478	0.57	1
Gm10073	0.000152384	0.103046	0.897	0.866	1
Dennd5a	0.000153025	-0.100542	0.587	0.699	1
Soga1	0.00015388	-0.114794	0.615	0.706	1
Zcchc7	0.000154074	-0.115813	0.609	0.689	1
Pacsin2	0.000154179	-0.10425	0.731	0.8	1
Bcap31	0.000161294	0.115112	0.753	0.686	1
Tnfsf9	0.00016215	0.12864	0.194	0.114	1
Vps29	0.00017161	0.102546	0.775	0.675	1
Golga4	0.000174126	-0.102284	0.676	0.761	1
Ino80d	0.000175319	-0.107264	0.431	0.537	1
Luc7l3	0.000183986	-0.112355	0.678	0.776	1
Fis1	0.000186155	0.100333	0.913	0.855	1
Cpd	0.000187535	0.110007	0.322	0.23	1
Zbtb20	0.000187916	-0.113483	0.814	0.847	1
Esd	0.000188699	0.107376	0.715	0.612	1
Dnajc5	0.000194855	-0.109708	0.737	0.801	1
Rock1	0.000198716	-0.106284	0.781	0.822	1
Sgk1	0.00021149	-0.118484	0.947	0.965	1
Ssu72	0.000212494	0.101883	0.779	0.689	1
Rab22a	0.000213336	-0.100928	0.374	0.472	1
Ppcdc	0.000217505	-0.102554	0.787	0.825	1
Ddi2	0.000219733	-0.113106	0.46	0.548	1
Fam193a	0.000220916	-0.122762	0.502	0.574	1
Sesn1	0.000223296	-0.10746	0.291	0.384	1
Pgp	0.000225795	-0.106376	0.545	0.643	1
Nufip2	0.000230021	-0.12241	0.81	0.858	1
Maff	0.000230718	0.136967	0.684	0.601	1
Hnrnph1	0.000232602	-0.107274	0.785	0.824	1
Rdx	0.000236783	-0.104118	0.834	0.864	1
Fcho2	0.000247082	-0.103349	0.771	0.814	1
Dip2b	0.000252099	-0.103176	0.751	0.807	1
Mark2	0.000255667	-0.106927	0.662	0.722	1
Klf13	0.000277556	-0.115965	0.771	0.846	1
2010107E04Rik	0.000285306	0.103015	0.838	0.781	1
Atox1	0.000286167	0.105283	0.988	0.989	1
Aftph	0.000286472	-0.112288	0.741	0.767	1
Cab39	0.000286779	-0.10148	0.621	0.711	1
Tia1	0.000291603	-0.10333	0.455	0.528	1
Vasp	0.000309149	0.108301	0.941	0.936	1
Aim2	0.000320629	-0.106876	0.688	0.77	1
Mob3c	0.000323286	-0.116909	0.874	0.921	1
Strn3	0.000340656	-0.107813	0.587	0.665	1
Bbc3	0.000342184	-0.109212	0.52	0.596	1
Blvrb	0.000345738	0.126739	0.729	0.651	1
Lpcat1	0.000383911	-0.107981	0.571	0.645	1
Psma1	0.000395268	0.114108	0.713	0.632	1
Pdlim4	0.00039528	-0.108723	0.767	0.827	1
Acp2	0.00041197	-0.109904	0.773	0.827	1
Ncoa3	0.00044307	-0.1071	0.569	0.608	1
Sdc4	0.000453826	0.136343	0.563	0.456	1
Adgre1	0.000468027	0.111456	0.86	0.818	1
Akap8l	0.000521047	-0.100514	0.601	0.684	1
Vat1	0.000607793	0.101408	0.223	0.145	1
Brd4	0.00063474	-0.110944	0.686	0.768	1
Brd7	0.00067746	-0.107424	0.609	0.675	1
Itgb2	0.00068229	0.114566	0.931	0.899	1
Whrn	0.000696831	-0.105243	0.678	0.732	1
P2ry6	0.000703495	-0.102872	0.957	0.982	1
Eno1	0.000712057	0.119079	0.877	0.827	1
Gm11808	0.000836243	0.108189	0.704	0.664	1
Marcksl1	0.000836615	0.10491	0.984	0.989	1
Emp3	0.00090766	0.118227	0.431	0.351	1
Pdcd11	0.000919181	-0.100715	0.393	0.469	1
Sepw1	0.000920854	0.113102	0.682	0.643	1
Hspb1	0.00100555	-0.132066	0.144	0.215	1
Baz1a	0.00100946	-0.102724	0.69	0.741	1
Birc3	0.00103394	-0.106854	0.632	0.704	1
Psma6	0.00105129	0.110538	0.66	0.588	1
Xiap	0.00125062	-0.119356	0.729	0.801	1
Txnrd1	0.00144177	0.107845	0.526	0.441	1
Isg15	0.00148851	0.100479	0.385	0.285	1
Psmb6	0.00156034	0.108468	0.933	0.881	1
Lrpap1	0.00156244	0.134678	0.751	0.695	1
Ang	0.00158251	0.101845	0.83	0.781	1
Cox7b	0.00160604	0.103457	0.806	0.741	1
Dusp2	0.00196391	0.161674	0.611	0.566	1
Ing2	0.00204552	-0.102006	0.486	0.566	1
Tagln2	0.00210655	0.108235	0.648	0.568	1
Rest	0.00211964	-0.111206	0.53	0.597	1
Taf3	0.00251934	-0.103221	0.441	0.52	1
Sdf2l1	0.00329826	0.120945	0.923	0.886	1
Phlda1	0.0040662	0.12224	0.362	0.296	1
Lgals1	0.00791969	0.116679	0.146	0.094	1
Cxcl10	0.00942137	0.128666	0.294	0.221	1
Ldha	0.0121905	0.106596	0.881	0.842	1
Ccl9	0.352688	0.12226	0.785	0.831	1
