# Supplementary material for: Microglia aging in the hippocampus advances through intermediate states that drive activation and cognitive decline
Source: eLife. 2025 Apr 29;13:RP97671. doi: 10.7554/eLife.97671 (PMC12040317; doi:10.7554/eLife.97671)
Supplement: Supplementary file 2. — The pseudotime analysis contains the spatial autocorrelation analysis. Moran’s I was used to detect focal expression of genes that were consequently constructed into co-regulated modules using Louvain community analysis. The table contains the adjusted p-value (q-value) and module information. [file elife-97671-supp2.xlsx]

## Sheet: Pseudotime Modules
	id	q-value	module	supermodule	dim_1	dim_2
560	Cx3cr1	0	1	1	-3.40712	1.22945
829	Malat1	0	1	1	-2.39234	2.76675
409	Marcks	7.03e-260	1	1	-3.02826	0.496636
848	mt-Co1	2.11e-208	1	1	-4.25901	-0.679541
850	mt-Atp6	7.78e-181	1	1	-4.27368	-0.706394
478	Zfhx3	1.55e-140	1	1	-3.33715	0.951908
851	mt-Co3	1.57e-136	1	1	-4.18598	-0.728535
855	mt-Cytb	4.13e-132	1	1	-4.2044	-0.794099
853	mt-Nd4	7.35e-126	1	1	-4.25641	-0.765395
849	mt-Co2	3.53e-105	1	1	-4.23664	-0.745607
189	Tgfbr1	1.15e-94	1	1	-3.68803	1.03995
847	mt-Nd2	1.02e-90	1	1	-4.25086	-0.755496
656	Mef2c	3.93e-90	1	1	-3.55191	1.60303
846	mt-Nd1	2.86e-87	1	1	-4.26467	-0.781631
360	Mef2a	1.66e-81	1	1	-3.08513	1.20747
762	Son	3.62e-78	1	1	-1.98716	1.89295
464	Gm26532	9.66e-77	1	1	-2.07317	2.43807
22	Srgap2	3.7e-74	1	1	-3.12583	0.529957
765	Qk	3.08e-61	1	1	-3.1559	0.907712
481	Maf	2.54e-59	1	1	-3.8044	1.17319
297	Hpgds	2.37e-57	1	1	-3.5084	0.629372
336	Pou2f2	3.85e-56	1	1	-3.00921	1.84104
626	Tanc2	1.48e-52	1	1	-3.28922	0.697317
392	Itgam	1.12e-49	1	1	-3.26037	0.640057
372	Slco2b1	8.02e-49	1	1	-3.02319	0.62963
377	Pde3b	2.28e-45	1	1	-3.25857	0.578036
203	Smap2	8.3e-41	1	1	-2.79504	1.81094
759	Nrip1	4.13e-39	1	1	-3.30242	1.67302
272	Tsc22d4	3.85e-38	1	1	-2.07995	1.89887
80	Mertk	8.73e-37	1	1	-3.17856	1.43191
470	Sall1	1.18e-36	1	1	-3.37903	1.10545
597	Ssh2	1.07e-34	1	1	-3.48946	1.20589
512	Kctd12	5.48e-34	1	1	-3.84196	0.155233
407	Epb41l2	2.08e-33	1	1	-3.24496	1.07814
767	Srrm2	2.42e-33	1	1	-2.78296	2.28554
49	Frmd4a	9.16e-33	1	1	-3.6166	0.310162
152	Il6ra	7.59e-31	1	1	-2.08324	1.8084
803	Zfp36l2	3.17e-30	1	1	-2.33145	2.22776
800	Rasgrp3	6.69e-28	1	1	-3.31447	1.14443
708	Basp1	1.98e-27	1	1	-2.05128	1.45066
513	Mycbp2	4.15e-27	1	1	-2.15346	1.84469
193	Col27a1	3.58e-26	1	1	-3.40376	1.01748
29	Rgs1	2.61e-25	1	1	-2.13315	2.48217
264	Rsrc2	8.65e-25	1	1	-1.73037	1.69179
85	Rrbp1	5.01e-24	1	1	-3.42644	2.26685
51	Plxdc2	7.05e-24	1	1	-3.18987	2.6537
212	Arid1a	2.67e-21	1	1	-3.33552	0.810091
854	mt-Nd5	2.02e-20	1	1	-4.22193	-0.735292
642	Hist1h1e	2.07e-20	1	1	-2.44162	2.19441
388	Ypel3	4.74e-20	1	1	-2.19054	1.58078
169	Fam102b	1.04e-19	1	1	-3.60078	0.377937
723	Csnk1e	1.89e-19	1	1	-2.50727	1.60193
28	Rgs2	1.4e-17	1	1	-1.94298	2.54843
95	Mafb	1.24e-16	1	1	-2.02082	2.66707
712	Mtdh	7.45e-16	1	1	-2.82513	1.58762
852	mt-Nd4l	1.54e-15	1	1	-4.10531	-0.662299
601	Adap2	1.94e-15	1	1	-3.09009	2.26067
10	Ankrd44	2.19e-15	1	1	-3.49443	1.48814
30	Gm10138	6.2e-15	1	1	-2.13444	2.3217
812	Cxxc5	8.4e-15	1	1	-2.87099	1.61829
106	Pmepa1	5.64e-14	1	1	-3.85633	0.770473
211	Wasf2	8.09e-14	1	1	-3.77468	1.55143
449	Mtus1	2.09e-13	1	1	-3.42744	1.62928
685	Zfp36l1	6.52e-13	1	1	-3.8101	1.69915
563	Nktr	9.8e-13	1	1	-3.19914	2.34557
308	Wnk1	2.01e-12	1	1	-4.10362	2.04995
368	Picalm	4.35e-12	1	1	-3.64783	0.925369
295	Tra2a	7.95e-12	1	1	-2.35666	2.20717
431	Nav3	7.95e-12	1	1	-3.87614	2.34804
128	Pag1	1.25e-11	1	1	-2.68273	1.89751
488	Ankrd11	1.97e-11	1	1	-3.62231	2.38791
669	Rock2	4.25e-11	1	1	-2.62164	0.483771
733	Syt10	5.81e-11	1	1	-3.97398	-0.608849
500	Tmem55b	1.34e-10	1	1	-2.36884	1.9462
497	Zmiz1	1.42e-10	1	1	-3.37802	0.944286
300	Hk2	1.72e-10	1	1	-3.79959	1.57547
73	Vps18	2.29e-10	1	1	-3.69899	0.836492
204	Macf1	3e-10	1	1	-3.84277	2.59773
628	Slc16a6	5.67e-10	1	1	-3.35891	1.23261
4	Dst	6.22e-10	1	1	-3.8956	2.59621
432	Atxn7l3b	6.72e-10	1	1	-3.13349	1.51608
168	Prpf38b	8.85e-10	1	1	-3.22496	2.43158
528	Cbl	1.95e-09	1	1	-3.48472	0.560735
567	Ikzf1	2.58e-09	1	1	-3.66721	1.3208
9	Map4k4	7.09e-09	1	1	-3.03965	2.26318
738	Dip2b	1.6e-08	1	1	-1.57091	1.26061
382	Eef2k	2.33e-08	1	1	-2.43576	1.96489
665	Il6st	3.46e-08	1	1	-3.24026	1.53786
448	Tacc1	5.68e-08	1	1	-3.07609	0.430291
690	Numb	8.44e-08	1	1	-2.8815	0.923252
447	Kat6a	9.58e-08	1	1	-3.10568	1.92719
145	Lrba	1.36e-07	1	1	-2.16692	1.03174
557	Klhdc8b	1.61e-07	1	1	-2.89131	0.564155
683	Arid4a	2.72e-07	1	1	-3.5577	2.47803
727	Tnrc6b	4.15e-07	1	1	-3.81707	1.2204
249	Zfp644	7.76e-07	1	1	-3.53079	1.968
283	Phf14	8.38e-07	1	1	-2.8333	1.8701
503	Slc7a8	1.07e-06	1	1	-3.09111	0.433376
556	Gnai2	1.21e-06	1	1	-2.03741	1.66237
233	Kmt2c	1.59e-06	1	1	-3.22766	0.977592
384	Rbbp6	1.7e-06	1	1	-2.87584	2.57019
65	Zeb2	2.08e-06	1	1	-3.20263	2.66992
159	Plekho1	2.85e-06	1	1	-2.45069	1.68979
139	Mbnl1	3.09e-06	1	1	-3.94959	0.926457
362	Akap13	3.48e-06	1	1	-3.66499	2.53506
808	Apc	3.63e-06	1	1	-3.4026	2.35475
376	Dennd5a	4.95e-06	1	1	-3.98537	-0.134598
426	Nfic	5.84e-06	1	1	-2.26129	2.31464
588	Per1	6.41e-06	1	1	-2.68807	0.935352
728	Ep300	8.37e-06	1	1	-2.292	0.586854
112	Tfe3	8.54e-06	1	1	-1.95278	1.95985
845	Eif3a	1.08e-05	1	1	-3.83724	2.59385
114	Ddx3x	1.34e-05	1	1	-3.21064	0.98674
101	Prex1	1.36e-05	1	1	-3.65791	0.425078
57	Vav2	1.53e-05	1	1	-3.38707	0.806455
827	Adrbk1	2.28e-05	1	1	-2.85917	0.706439
224	Spen	2.73e-05	1	1	-3.8133	2.30581
553	Dusp7	3.07e-05	1	1	-1.79492	0.673042
182	Ttpa	3.11e-05	1	1	-1.90154	0.167
194	Whrn	4.38e-05	1	1	-3.61097	0.552943
40	Arhgap30	5.72e-05	1	1	-2.97985	2.67268
748	Hes1	6.17e-05	1	1	-3.06281	-0.217377
600	Aldoc	6.5e-05	1	1	-3.96241	-0.598836
177	Pkn2	8.28e-05	1	1	-3.80017	1.81568
608	Zfp652	0.000100763	1	1	-3.18859	1.07424
364	Zfp710	0.000127407	1	1	-3.47995	0.469864
236	0610040J01Rik	0.000150933	1	1	-2.28319	1.20235
232	Kmt2e	0.000167434	1	1	-2.60282	1.11382
752	Osbpl11	0.000198543	1	1	-3.36082	2.59842
595	Pafah1b1	0.000210443	1	1	-2.33384	1.30372
442	Arglu1	0.000247219	1	1	-3.52523	2.12472
358	Nav2	0.000269132	1	1	-2.95005	0.702047
566	Purb	0.000375983	1	1	-3.10765	1.1429
370	Gab2	0.000389038	1	1	-3.38392	0.530344
163	Rsbn1	0.000453781	1	1	-2.64796	1.56496
66	Itga6	0.000621094	1	1	-3.78138	1.81048
514	Rbm26	0.00111614	1	1	-2.38249	0.661954
736	Fmnl3	0.00119778	1	1	-3.65003	0.836562
487	Cbfa2t3	0.00126784	1	1	-2.9375	1.71441
452	Gmip	0.00144526	1	1	-3.38784	0.241768
107	Stx16	0.00144879	1	1	-3.96379	1.56338
275	Tnrc18	0.00158732	1	1	-2.91297	0.689669
823	Smad4	0.00166387	1	1	-3.97772	2.22561
71	Trim44	0.00217898	1	1	-3.76193	2.18837
126	Zrsr2	0.00242511	1	1	-3.35544	2.67193
775	Mapk14	0.00263633	1	1	-3.82148	1.52978
578	Aff4	0.00330281	1	1	-2.89026	2.49028
753	Zbtb20	0.00358249	1	1	-3.44722	0.830462
94	Soga1	0.00372901	1	1	-2.58126	0.590518
240	Apbb2	0.00384366	1	1	-3.22738	1.89343
59	Prrc2b	0.0039013	1	1	-4.26803	-0.639574
183	Zfp292	0.0042718	1	1	-3.53337	1.42365
834	Nxf1	0.00454895	1	1	-2.4738	0.481403
674	Pik3cg	0.00462543	1	1	-3.81223	0.903031
646	Prpf4b	0.00527637	1	1	-3.28411	1.75352
323	Etnk1	0.00530954	1	1	-2.88205	0.441908
161	Syt6	0.0053875	1	1	-1.88189	0.999514
92	Itch	0.00547387	1	1	-3.95514	1.05323
625	Itgb3	0.0089959	1	1	-3.77764	1.70761
677	Strn3	0.009585	1	1	-2.51483	0.528845
648	Rreb1	0.00972538	1	1	-3.92984	0.971944
828	Kdm2a	0.00989926	1	1	-2.8641	1.37972
70	Acp2	0.0101145	1	1	-3.60358	0.726782
666	Dnmt3a	0.0104504	1	1	-3.83718	1.77122
491	Irf2bp2	0.0106585	1	1	-3.39852	1.46604
290	Ubn2	0.0110126	1	1	-3.608	2.15041
386	Arhgap17	0.0113324	1	1	-2.10827	1.38323
749	Pak2	0.0149184	1	1	-3.729	1.37366
32	Dhx9	0.0150863	1	1	-3.06563	1.7927
492	2610044O15Rik8	0.0157926	1	1	-1.57692	0.990257
819	Camk2a	0.016514	1	1	-4.19946	-0.766125
796	Safb2	0.0212961	1	1	-2.95631	1.5321
130	Tbl1xr1	0.0228877	1	1	-3.10774	1.15869
630	Dnaic2	0.0270883	1	1	-1.9407	-0.746563
641	Zscan26	0.0277411	1	1	-4.00259	1.17182
230	Ccnl2	0.030593	1	1	-2.98334	2.54685
516	Gpr183	0.0321233	1	1	-2.38603	0.86291
533	Csk	0.0419537	1	1	-2.2772	0.555842
280	Ubl3	0.0429103	1	1	-3.24229	0.303613
479	Phlpp2	0.0440552	1	1	-2.38007	1.21016
743	Crebbp	0.051423	1	1	-3.19048	0.0733727
270	Trim56	0.0537856	1	1	-3.31442	2.27394
27	Camsap2	0.0584097	1	1	-3.90013	2.30317
180	Chd7	0.0608853	1	1	-3.13506	2.06148
385	Tnrc6a	0.0638572	1	1	-2.90783	1.75587
303	Rybp	0.068019	1	1	-2.89035	1.72391
617	Msl1	0.0735513	1	1	-3.66888	1.19638
419	Bsg	0.076698	1	1	-1.92899	-1.25029
610	Cbx1	0.0775414	1	1	-3.60303	2.01986
584	Ulk2	0.0782573	1	1	-3.76414	0.776641
361	Chd2	0.0796688	1	1	-3.25756	2.79104
422	Rexo1	0.0937806	1	1	-3.42391	2.02098
263	Kdm2b	0.102014	1	1	-4.13509	1.39556
47	Wdr26	0.105265	1	1	-2.7715	2.47154
288	Mkln1	0.109783	1	1	-2.33807	0.956282
822	Tcf4	0.113572	1	1	-3.19447	1.46423
37	Nos1ap	0.115478	1	1	-3.26823	1.50791
741	Sp1	0.128718	1	1	-2.10629	1.55881
793	Gtpbp2	0.145263	1	1	-2.36905	1.59745
541	Tpm1	0.15657	1	1	-2.84365	0.0988188
716	Mtss1	0.156781	1	1	-3.4846	2.33976
734	Gxylt1	0.165414	1	1	-3.33115	1.83325
684	Rtn1	0.176648	1	1	-2.51795	0.334329
739	Zfp740	0.182896	1	1	-2.49742	1.09783
643	BC005537	0.18696	1	1	-2.43582	2.41888
267	Gtf2i	0.211985	1	1	-4.1578	2.0275
844	Ablim1	0.218245	1	1	-2.21108	-1.28194
638	Zmynd11	0.218935	1	1	-3.47919	2.15148
474	Cmtm4	0.23655	1	1	-2.72204	1.16213
726	Atf4	0.246468	1	1	-1.91437	1.64693
732	Plxnb2	0.26364	1	1	-2.96144	1.02472
520	Cep57	0.27769	1	1	-2.3357	0.512675
671	Adam17	0.284145	1	1	-3.95087	2.39835
83	Rassf2	0.297176	1	1	-3.9781	0.83346
25	Ppp1r12b	0.299927	1	1	-3.83526	2.5868
598	Git1	0.304003	1	1	-2.91717	-0.295953
570	Usp34	0.322349	1	1	-3.42821	2.64951
141	Kpna4	0.335386	1	1	-2.12336	0.759723
69	Celf1	0.371406	1	1	-3.41717	0.85527
259	Med13l	0.372878	1	1	-3.24839	0.851427
526	Ubash3b	0.383107	1	1	-3.47302	0.929246
1	Pcmtd1	0.391293	1	1	-3.67138	0.321807
797	Safb	0.394386	1	1	-2.66196	2.43538
26	Arl8a	0.4374	1	1	-2.64179	1.55408
766	Map3k4	0.447631	1	1	-3.6498	2.14643
622	Ubtf	0.466386	1	1	-3.96654	1.79893
718	Asap1	0.475122	1	1	-4.05815	1.88264
104	Fam209	0.49657	1	1	-3.71615	-0.146281
68	Agps	0.502251	1	1	-3.21504	1.88849
746	Cldn5	0.550039	1	1	-2.13443	-1.35999
511	Vwa8	0.561663	1	1	-1.80861	0.875246
111	Dnajc5	0.574099	1	1	-2.99906	1.91476
291	Braf	0.581798	1	1	-2.97797	1.32638
780	Pknox1	0.589258	1	1	-2.31546	1.07632
329	Pglyrp1	0.60567	1	1	-2.05606	-1.40408
67	Gpr155	0.621116	1	1	-3.0994	0.957149
576	Psme2b	0.636144	1	1	-3.43419	1.3143
387	Xpo6	0.643742	1	1	-2.75558	0.376208
339	Hnrnpul1	0.657345	1	1	-3.68951	-0.140182
686	2310015A10Rik	0.660509	1	1	-2.83129	-0.646425
207	Zfp362	0.661972	1	1	-2.6394	0.314647
693	Dio2	0.69142	1	1	-1.70619	0.338068
564	Cabp7	0.700157	1	1	-3.51095	0.0735176
731	Brd1	0.721358	1	1	-2.30397	0.652978
412	Spock2	0.743727	1	1	-2.0511	-1.2792
286	Tmem229a	0.790074	1	1	-2.47356	-0.434596
809	Kdm3b	0.799133	1	1	-3.24355	1.86599
229	Gabrd	0.832175	1	1	-2.15329	-0.0016293
469	Phkb	0.858525	1	1	-2.84113	1.99376
460	Slc35e1	0.880903	1	1	-3.60719	0.863229
611	Osbpl7	0.885305	1	1	-1.67451	1.25447
247	Prdm8	0.890755	1	1	-2.83987	-0.643153
664	Srek1	0.895505	1	1	-3.84822	2.54071
52	Nebl	0.903284	1	1	-2.15056	-1.38206
178	Cyr61	0.913875	1	1	-2.2382	-1.19044
711	Trio	0.937435	1	1	-3.29551	1.56536
644	Foxf2	0.938722	1	1	-2.40362	-1.11381
675	Ccdc71l	0.940879	1	1	-1.80346	-1.26068
309	Slc25a18	0.942591	1	1	-1.77791	0.558966
289	Tmem140	0.943555	1	1	-3.60993	0.438915
357	Ccdc114	0.946125	1	1	-2.47882	2.72558
231	Rsbn1l	0.948515	1	1	-3.86686	1.83112
342	Zfp60	0.948515	1	1	-2.40932	0.46227
5	2010300C02Rik	0.951502	1	1	-1.99915	-1.42181
473	Pllp	0.955239	1	1	-2.08596	-1.42466
117	Gria3	0.956893	1	1	-2.26071	1.37199
396	Gm15582	0.958333	1	1	-2.69547	-0.805351
434	Ptprr	0.963377	1	1	-2.19323	-1.39109
699	Mark3	0.963377	1	1	-2.6957	1.57636
804	Rhoq	0.968937	1	1	-3.40329	1.65261
433	Thap2	0.975485	1	1	-2.00668	1.04233
174	Tet2	0.977057	1	1	-3.4914	2.41878
381	Knop1	0.979651	1	1	-3.97365	2.14109
542	Tln2	0.979651	1	1	-2.12922	0.139029
62	Rabepk	0.980595	1	1	-1.74773	0.904817
133	Slc7a14	0.980595	1	1	-2.41783	0.987211
134	Dcun1d1	0.980595	1	1	-2.36831	1.37603
142	Ppm1l	0.980595	1	1	-3.926	1.07415
155	A730011C13Rik	0.980595	1	1	-3.37908	1.88387
201	Zswim5	0.980595	1	1	-1.87539	-0.536325
237	C030018K13Rik	0.980595	1	1	-1.7444	0.29082
241	Gm19590	0.980595	1	1	-2.5794	2.62939
252	Gm26779	0.980595	1	1	-2.31352	2.83794
271	Ephb4	0.980595	1	1	-2.64871	-0.873027
293	Zfp282	0.980595	1	1	-3.81011	1.32147
302	Gata2	0.980595	1	1	-2.27316	-1.12499
317	Cracr2a	0.980595	1	1	-1.97377	0.292541
330	Dmpk	0.980595	1	1	-3.2182	-0.059797
391	Fbxl19	0.980595	1	1	-2.64952	1.27323
408	Lama2	0.980595	1	1	-2.75401	-0.755658
475	Ctrl	0.980595	1	1	-2.01063	-1.44122
477	Smpd3	0.980595	1	1	-3.88807	0.988637
485	Car5a	0.980595	1	1	-2.27647	-1.35532
490	Gm17296	0.980595	1	1	-4.18006	-0.836644
504	Lrrc16b	0.980595	1	1	-2.51289	1.02269
530	Gm684	0.980595	1	1	-1.73325	0.867082
534	Nptn	0.980595	1	1	-2.79396	0.794187
558	P4htm	0.980595	1	1	-2.82634	-0.629261
624	Gjc1	0.980595	1	1	-2.46701	-0.920505
662	Gm10320	0.980595	1	1	-2.73508	-0.684231
688	Sipa1l1	0.980595	1	1	-3.73029	2.22596
745	Med15	0.980595	1	1	-3.93849	2.32646
750	Fyttd1	0.980595	1	1	-3.51577	1.80183
835	Hnrnpul2	0.980595	1	1	-3.72017	2.56139
841	Lgi1	0.980595	1	1	-1.76432	0.535634
586	Gm27194	0.982146	1	1	-3.32163	1.5296
125	Cdkl5	0.994686	1	1	-3.80757	0.341733
151	Pbxip1	0.996516	1	1	-2.7111	1.22607
618	Krt222	1	1	1	-2.22539	-1.25637
663	Naip1	1	1	1	-4.12182	1.83608
23	Rab7b	0	4	2	3.57828	0.748859
50	Vim	0	4	2	4.2155	0.315877
113	Cybb	0	4	2	3.58612	0.749197
129	Fabp5	0	4	2	4.72643	-0.533399
248	Spp1	0	4	2	4.52109	-0.366496
274	Fam20c	0	4	2	4.02482	-0.62192
333	Apoe	0	4	2	3.16951	0.329502
411	Lilrb4a	0	4	2	3.73627	0.217042
427	Igf1	0	4	2	4.60368	-0.383105
435	Lyz2	0	4	2	3.36498	0.201047
451	Lpl	0	4	2	3.76881	-0.598465
499	Lgals3	0	4	2	4.12596	-0.396166
836	Fth1	0	4	2	3.0978	0.372517
839	Ch25h	5.02e-287	4	2	3.72338	-0.0935312
87	Cst7	1.81e-279	4	2	3.86438	-0.433007
294	Gpnmb	2.92e-240	4	2	4.82139	-0.476856
518	Mmp12	3.31e-227	4	2	4.71668	-0.514744
340	Axl	2.72e-221	4	2	3.2475	0.426253
320	Olr1	3.87e-219	4	2	4.40147	-0.463665
347	Fxyd5	6.87e-216	4	2	3.92856	0.539778
299	Capg	8.82e-206	4	2	3.74813	-0.709151
393	Itgax	4.17e-199	4	2	4.20964	-0.425568
650	Cxcl14	4.36e-188	4	2	4.56499	-0.446733
187	Cd72	1.32e-178	4	2	3.53431	0.869762
353	Ftl1	2.02e-152	4	2	3.94401	-0.552907
213	Cd52	1.72e-150	4	2	3.12277	0.352042
543	Anxa2	7.8e-131	4	2	4.10581	0.443945
840	Myof	3.43e-130	4	2	4.70517	-0.239901
703	Ahnak2	5.95e-125	4	2	4.67343	-0.471844
813	Cd14	2.87e-111	4	2	2.81603	0.832918
135	Anxa5	2.31e-98	4	2	3.56966	0.472443
82	Il1b	5.35e-95	4	2	2.88907	1.0184
137	Slc7a11	2.73e-92	4	2	3.35173	0.109085
837	Ms4a7	8.06e-90	4	2	3.6843	0.799072
593	Cxcl16	4.22e-83	4	2	2.88744	0.802146
58	Ass1	3.04e-79	4	2	4.27756	0.182123
214	Sh3bgrl3	4.35e-76	4	2	3.17493	-0.0717328
313	Pianp	9.71e-75	4	2	4.643	-0.425678
548	Bcl2a1a	3.32e-72	4	2	2.6605	0.986522
792	Pla2g7	8.45e-71	4	2	3.69602	0.675547
394	Cox6a2	8.84e-70	4	2	3.47455	-0.751115
549	Bcl2a1b	4.56e-65	4	2	1.71051	1.88262
704	Crip1	8.13e-65	4	2	4.10693	0.347092
536	Pkm	6.1e-64	4	2	3.51793	-0.741126
594	Pfn1	6.78e-63	4	2	1.60256	1.51954
531	Cspg4	2.24e-61	4	2	3.88531	-0.542052
547	Bcl2a1d	5.54e-61	4	2	2.75403	0.945212
356	Emp3	2.61e-59	4	2	3.23714	0.278336
216	Clic4	1.72e-57	4	2	2.79942	1.00451
605	Wfdc17	2.95e-57	4	2	3.86827	0.682937
244	Cxcl2	8.45e-57	4	2	3.65254	0.743731
649	Cd83	1.14e-54	4	2	1.77861	2.06351
235	Gm1673	5.16e-54	4	2	4.59251	-0.469756
181	Atp6v0d2	5.47e-53	4	2	4.88058	-0.404854
418	Cstb	4.05e-50	4	2	3.64099	-0.534937
603	Ccl3	3.3e-49	4	2	1.96875	1.97814
621	Vat1	1.86e-47	4	2	4.61504	-0.438904
428	Plxnc1	1.37e-46	4	2	4.88298	-0.443667
54	Il1rn	3.93e-42	4	2	3.01436	0.435916
545	Myo5a	3.04e-41	4	2	4.43489	-0.172245
81	Il1a	2.9e-40	4	2	1.54133	1.89246
680	Nfkbia	2.17e-39	4	2	1.33318	2.24078
398	Adam8	1.15e-38	4	2	3.5641	-0.200553
72	Cd44	5.98e-37	4	2	4.15453	0.33443
457	Cyp4f18	2.66e-36	4	2	3.2686	0.689733
334	Plaur	3.25e-34	4	2	1.789	1.63497
523	AB124611	6.6e-33	4	2	4.04511	0.520637
721	Lgals1	1.24e-32	4	2	4.10594	0.241545
415	Srgn	3.41e-32	4	2	2.43954	1.22373
417	Mif	2.36e-31	4	2	3.44543	-0.690901
818	Cd74	9.29e-31	4	2	3.677	0.849618
147	Nes	1.72e-30	4	2	3.73142	-0.548335
524	Aplp2	3.07e-28	4	2	3.62817	-0.676649
602	Slfn2	4.77e-28	4	2	2.50599	1.24339
310	Clec4d	1.42e-27	4	2	3.33729	0.507106
243	Afp	5.31e-26	4	2	4.35354	-0.355599
304	Bhlhe40	2.25e-25	4	2	4.11056	0.324369
655	Ell2	4.08e-25	4	2	2.51512	1.17384
8	Rnf149	8.96e-25	4	2	2.48728	1.20864
742	Gpr84	3.49e-24	4	2	1.94387	1.62154
709	Ank	4.43e-24	4	2	3.72565	-0.622363
167	Csf1	5.08e-24	4	2	2.04648	1.98146
164	Rhoc	1.03e-23	4	2	3.76003	-0.547538
779	Pim1	2.09e-23	4	2	2.63885	1.16351
458	Tpm4	2.37e-23	4	2	3.6521	-0.301401
722	Maff	1.18e-21	4	2	1.54838	1.95634
760	Mir155hg	1.4e-21	4	2	2.27054	1.50518
131	Nceh1	3.61e-21	4	2	4.29383	-0.409012
604	Ccl4	1.47e-20	4	2	1.95323	1.98029
831	Ehd1	5.99e-20	4	2	2.37607	1.27982
278	Arpc1b	2.37e-19	4	2	3.39403	-0.612468
786	Tnf	1.08e-18	4	2	1.83164	2.0303
672	Id2	2.22e-18	4	2	1.84591	1.93469
482	Cotl1	7.99e-18	4	2	1.68519	1.61212
319	Klrb1a	1.06e-17	4	2	4.25707	-0.516703
694	Calm1	1.65e-17	4	2	3.24733	0.220975
799	C3	2.5e-17	4	2	4.01377	-0.130474
707	Ptger4	2.77e-17	4	2	2.95234	0.590366
170	Vcam1	4.19e-17	4	2	2.16407	1.55431
814	Cdo1	4.7e-17	4	2	4.79095	-0.488451
209	Fabp3	1.21e-16	4	2	3.91046	-0.581519
171	Ccdc109b	1.63e-16	4	2	4.04987	0.446903
573	Sh3pxd2b	4.64e-16	4	2	3.75615	0.757544
423	Gadd45b	6.11e-16	4	2	1.65846	2.09595
268	Lat2	8.13e-16	4	2	3.09594	0.0595371
21	Cxcr4	9.18e-15	4	2	4.84488	-0.359806
701	Inf2	2.56e-13	4	2	3.4807	-0.0565136
544	Myo1e	5.76e-13	4	2	3.77494	-0.54863
816	Smim3	1.56e-12	4	2	2.32246	1.26172
42	Slamf9	2.46e-12	4	2	2.90365	0.122553
79	Dusp2	3.28e-12	4	2	1.67966	1.99898
311	Tpi1	7.16e-12	4	2	3.55311	-0.614613
199	Akr1a1	4.07e-11	4	2	3.01407	0.0205897
815	Lmnb1	4.59e-11	4	2	3.076	0.650056
619	Tubg2	7.56e-11	4	2	1.92956	1.72758
365	Iqgap1	1.16e-09	4	2	3.70936	0.823296
494	Il3ra	9.96e-09	4	2	4.87416	-0.411308
332	Apoc1	2.65e-08	4	2	4.63875	-0.221008
443	Rab20	5.04e-08	4	2	1.58993	1.90437
328	C5ar1	8.12e-08	4	2	1.62194	1.86281
654	Gm10116	9.81e-08	4	2	4.68146	-0.762915
596	Cpd	1.04e-07	4	2	3.59085	-0.387879
795	Rftn1	1.58e-07	4	2	4.53362	-0.443629
346	Cd22	2.36e-07	4	2	3.24779	-0.230241
679	Egln3	2.83e-07	4	2	3.49458	-0.659227
801	Tmem178	2.85e-07	4	2	4.69402	-0.608552
640	Aoah	3.21e-07	4	2	3.46385	0.39312
166	AI504432	3.58e-07	4	2	2.84105	0.715023
613	Arl5c	4.33e-07	4	2	2.05334	1.75765
468	Man2b1	1.75e-06	4	2	1.98109	1.28609
438	Myl6	2.38e-06	4	2	3.06034	-0.261129
149	Lmna	2.69e-06	4	2	3.4755	-0.217974
363	AU020206	2.91e-06	4	2	3.51165	-0.397869
256	Coro1c	3.69e-06	4	2	3.66226	-0.386049
143	Tlr2	1.67e-05	4	2	2.62729	0.996484
607	Dhx40	3.76e-05	4	2	2.29992	1.29439
615	Stac2	0.00170583	4	2	4.80501	-0.559968
568	Plek	0.00282746	4	2	1.45205	2.01997
99	Sdc4	0.00335495	4	2	2.16884	1.64792
90	Trib3	0.00435963	4	2	3.81412	-0.553587
298	Gng12	0.00570662	4	2	3.45779	-0.664648
46	Itpkb	0.02592	4	2	2.47222	1.19893
176	Dnajb14	0.0375403	4	2	3.64684	-0.390374
89	Srxn1	0.0778918	4	2	2.50772	1.15309
307	Plxnd1	0.618372	4	2	4.65208	-0.25201
77	AA467197	0.955239	4	2	3.69223	0.945642
508	Piwil2	0.955239	4	2	2.30893	0.889198
269	4933404O12Rik	0.963325	4	2	3.75775	1.03
681	Gm5786	0.98004	4	2	3.94185	1.02732
154	Tchh	0.980595	4	2	4.83644	-0.516594
430	Gad1-ps	0.980595	4	2	4.23477	0.658542
506	Cideb	0.980595	4	2	3.59039	1.00924
20	Nckap5	0.98124	4	2	4.78531	-0.652217
842	Pdlim1	0.981823	4	2	4.17373	0.590655
76	B2m	0	5	2	1.48495	-0.727571
86	Cst3	0	5	2	0.258019	-0.72848
109	Ctsz	0	5	2	2.57445	-0.719639
138	P2ry12	0	5	2	-0.00470601	-0.661003
157	Ctss	0	5	2	0.889224	-0.880094
221	C1qa	0	5	2	0.889833	-0.873396
254	Tmem119	0	5	2	-0.246676	-0.89989
255	Selplg	0	5	2	-0.199976	-0.848036
316	Cd9	0	5	2	1.95936	-0.94982
441	Cd63	0	5	2	2.87612	-0.610373
507	Ctsb	0	5	2	2.62571	-0.732289
580	Sparc	0	5	2	-0.670283	-0.605091
660	Hexb	0	5	2	0.651915	-0.858112
695	Lgmn	0	5	2	0.764862	-0.891759
820	Csf1r	0	5	2	-0.895993	-0.472596
345	Tyrobp	1.21e-287	5	2	2.62577	-0.592219
402	Cd81	2.91e-271	5	2	1.22929	-0.702733
486	Cyba	1.79e-233	5	2	2.83934	-0.767127
39	Fcer1g	1.78e-227	5	2	1.48619	-0.727645
705	Sepp1	1.17e-200	5	2	0.17256	-0.715269
219	C1qb	5.6e-196	5	2	1.16593	-0.865209
115	Gpr34	3.9e-193	5	2	-0.572883	-0.709315
253	Crybb1	1.02e-180	5	2	0.0436182	-0.792238
652	Ctsl	2.74e-169	5	2	1.09181	-0.914898
359	Siglech	2.93e-169	5	2	-0.552559	-0.707123
691	Npc2	8.79e-160	5	2	2.00654	-0.652876
44	AI607873	7.06e-153	5	2	2.28861	0.1785
509	Itm2b	3.04e-152	5	2	1.19484	-0.750448
127	Tmsb4x	1.4e-149	5	2	1.24091	-0.817304
401	Ctsd	1.72e-145	5	2	1.98727	-0.939158
787	H2-D1	3.13e-144	5	2	2.01913	-0.289779
696	Ifi27l2a	3.4e-123	5	2	2.2104	0.0956021
414	Vsir	3.89e-114	5	2	-0.429882	-0.819511
146	Fcrls	6.83e-105	5	2	-0.5141	-0.582339
634	Timp2	7.65e-98	5	2	2.15804	-0.400738
162	Olfml3	1.21e-92	5	2	0.361863	-0.900189
591	Cd68	2.03e-91	5	2	2.45064	-0.790703
45	Ifi204	9.97e-86	5	2	2.18766	0.0997302
220	C1qc	6.85e-85	5	2	1.29056	-0.903787
200	Prdx1	8.11e-79	5	2	2.88378	-0.463868
399	Ifitm3	2.95e-74	5	2	2.26072	0.141358
471	Lpcat2	4.94e-72	5	2	-0.0503794	-0.942959
395	Rgs10	4.2e-71	5	2	-0.17261	-0.665155
413	Psap	7.09e-67	5	2	2.17802	-0.795343
609	Abi3	1.11e-61	5	2	-0.074173	-0.366309
700	Ckb	2.85e-60	5	2	0.0459912	-0.556604
63	Ptgs1	2.24e-58	5	2	-0.649503	-0.657332
702	Pld4	1.07e-57	5	2	-0.112061	-0.932646
651	Golm1	4.28e-53	5	2	-0.47257	-0.176785
777	Fgd2	1.51e-48	5	2	-1.56844	0.107066
444	Lamp1	4.05e-48	5	2	2.34044	-0.629089
315	Gapdh	4.23e-47	5	2	3.06427	-0.902255
38	Fcgr3	6.58e-46	5	2	0.924717	-0.846122
227	Slc2a5	1.26e-44	5	2	-0.061534	-0.670254
389	Aldoa	1.76e-43	5	2	2.5707	-0.735442
462	Scoc	4.63e-40	5	2	-1.06795	-0.451755
678	Arhgap5	1.02e-38	5	2	-1.02042	-0.452709
807	Bin1	2.45e-37	5	2	-0.417383	-0.793179
405	Ifngr1	1.91e-36	5	2	-0.170724	-0.760863
277	Fscn1	7.1e-36	5	2	0.0975266	-0.370039
811	Ecscr	2.93e-34	5	2	-0.171524	-0.406027
737	Tmbim6	8.98e-34	5	2	0.785322	-0.913324
635	Lgals3bp	1.7e-33	5	2	2.17989	-0.265498
501	Rnase4	3.13e-32	5	2	-0.388877	-0.711233
257	Oasl2	1.52e-29	5	2	2.19185	0.137267
639	Elmo1	1.3e-26	5	2	-1.41011	-0.177414
805	Calm2	3.72e-26	5	2	0.165104	-0.624458
719	Ly6e	1.41e-25	5	2	1.21142	-0.758327
832	Cox8a	6.26e-25	5	2	2.78888	-2.19262
56	Slc2a6	8.13e-25	5	2	2.53956	0.220835
75	Serf2	5.75e-24	5	2	3.02956	-1.83617
581	Atox1	5.82e-24	5	2	3.03123	-1.22497
36	Rxrg	6.65e-24	5	2	2.19786	-0.339297
108	Gnas	4.12e-23	5	2	3.29862	-0.8512
794	Trem2	1.49e-22	5	2	2.07078	-0.87381
41	Cd48	3.91e-21	5	2	2.67324	-0.633317
19	Pdcd1	6.59e-20	5	2	2.97415	-0.636288
210	Laptm5	8.56e-20	5	2	0.423037	-0.944771
710	Fam105a	1.63e-19	5	2	-0.228656	-0.821529
341	Pld3	1.12e-18	5	2	2.89928	-0.580673
647	Ly86	8.08e-17	5	2	0.889487	-1.00618
245	Cxcl13	1.29e-16	5	2	2.17336	0.0614947
251	Crlf2	4.54e-16	5	2	2.01529	-0.526342
281	Alox5ap	1.51e-15	5	2	0.0940225	-1.04117
367	Ctsc	9.52e-14	5	2	2.73015	-0.00159451
215	Rsrp1	2.02e-13	5	2	-0.580797	-0.715334
31	Ivns1abp	6.32e-13	5	2	-0.914939	-0.608737
456	Bst2	6.8e-13	5	2	2.28354	0.137167
535	Hexa	1.21e-12	5	2	1.34067	-0.955707
623	Grn	7.08e-12	5	2	1.64518	-1.06464
410	Cd164	2.02e-11	5	2	-1.09912	-0.403632
74	Pdia3	1.34e-10	5	2	1.9331	-0.89842
246	Anxa3	3.13e-10	5	2	1.32272	-0.701665
124	Acot9	3.45e-10	5	2	2.8296	-0.214118
383	Igsf6	6.34e-10	5	2	2.38618	-0.26658
445	Gas6	5.51e-09	5	2	0.13217	-0.597048
165	Cd53	9.28e-09	5	2	0.625651	-0.89741
234	Ywhah	1.19e-08	5	2	0.391598	-1.00837
565	Ppia	2.12e-08	5	2	2.63587	-1.69904
265	Hcar2	2.19e-08	5	2	1.66094	-0.469942
785	Aif1	3.96e-08	5	2	1.26005	-0.822441
670	Pdia6	9.78e-08	5	2	1.44682	-0.751083
222	Cdc42	1.65e-07	5	2	1.0757	-0.639784
312	Lag3	3.15e-07	5	2	0.729491	-0.882435
156	Tnfaip8l2	1.16e-06	5	2	-0.136622	-0.0840338
321	Hebp1	3.15e-06	5	2	2.23798	-0.543084
661	Btf3	5.42e-06	5	2	1.2336	-1.14332
197	Tmem59	1.96e-05	5	2	0.740391	-0.7477
725	Syngr1	3.72e-05	5	2	2.83557	-1.04554
552	Trf	6.56e-05	5	2	0.738726	-0.686552
476	Pla2g15	9.5e-05	5	2	-0.401131	-0.997887
559	Cmtm6	0.000113006	5	2	-0.148174	-0.593869
284	Capza2	0.000321798	5	2	0.708889	-0.896604
579	Hint1	0.000531508	5	2	2.82385	-2.03705
373	Spcs2	0.000547692	5	2	1.55426	-0.933307
668	Laptm4a	0.000604269	5	2	0.825824	-0.711312
484	Irf8	0.00114893	5	2	-0.390298	0.0221857
550	Ctsh	0.00133653	5	2	2.14258	-0.633443
35	Soat1	0.00167953	5	2	3.24813	-0.707345
100	Ctsa	0.00181919	5	2	1.7474	-1.03236
532	Commd4	0.00576461	5	2	2.96968	-0.829703
322	Ldhb	0.00845688	5	2	0.510886	-0.854589
53	Apbb1ip	0.00895588	5	2	-0.508325	-0.141474
119	Atp6ap1	0.0228469	5	2	1.41926	-0.857761
262	Erp29	0.0307694	5	2	-0.591531	-0.105979
658	Cox7c	0.0376034	5	2	2.52829	-1.96995
521	Ubl5	0.0830128	5	2	2.67028	-2.84553
502	Slc7a7	0.118623	5	2	-0.550742	-1.05892
98	Pkig	0.211934	5	2	2.41205	-1.92426
16	Slc11a1	0.398555	5	2	1.71508	0.391629
285	Ndufa5	0.432882	5	2	2.33645	-1.6449
632	Ten1	0.617045	5	2	2.37532	-1.71596
223	Minos1	0.65549	5	2	2.85494	-1.50229
380	Arl6ip1	0.691536	5	2	1.16511	-0.521944
6	Pdcl3	0.701499	5	2	-0.398995	-0.215109
505	Tssk4	0.781798	5	2	1.70632	-0.411795
305	Grm7	0.955239	5	2	-1.64088	-0.531388
653	Zfp58	0.965773	5	2	-0.730976	-0.709693
150	Efna1	0.977057	5	2	1.98013	0.128467
2	Adhfe1	0.977212	5	2	-0.635267	-0.671629
188	Nans	0.980595	5	2	2.82261	-0.785559
218	Tcea3	0.980595	5	2	-1.61897	-0.523862
403	Ano1	0.980595	5	2	-1.62082	-0.535405
480	Il34	0.980595	5	2	-1.66385	-0.47876
537	Gm10655	0.980595	5	2	-1.69043	-0.54057
551	Anapc13	0.980595	5	2	2.79936	-2.32184
196	Jun	0	2	1	-1.17423	2.7187
454	Jund	0	2	1	-1.56216	2.22989
667	Rhob	0	2	1	-1.1143	2.56269
24	Btg2	6.34e-277	2	1	-0.827451	2.73391
467	Junb	2.84e-257	2	1	-0.63979	2.77356
459	Klf2	1.44e-255	2	1	-1.19727	2.60867
266	Ubc	4.77e-234	2	1	0.0339594	1.51809
810	Egr1	1.19e-232	2	1	-0.826805	2.41725
34	Ier5	5.15e-232	2	1	-0.627182	2.67329
692	Fos	1.04e-197	2	1	-0.931113	2.75181
344	Zfp36	4.2e-192	2	1	-0.83114	2.65293
93	Rbm39	2.06e-187	2	1	-1.535	2.20682
416	Jmjd1c	2.76e-169	2	1	-0.676792	2.21704
48	Atf3	1.35e-153	2	1	-0.865923	2.76141
331	Fosb	9.57e-152	2	1	-1.02593	2.05737
637	Klf6	2.07e-127	2	1	-1.35879	2.52971
354	Ppp1r15a	7.63e-126	2	1	-0.75868	2.76174
627	Ddx5	3.57e-124	2	1	0.228124	1.61113
585	Ubb	5.29e-117	2	1	0.116364	1.40891
33	Glul	4.22e-115	2	1	-0.187765	2.1834
140	Ccnl1	1.09e-96	2	1	-0.420101	2.34149
190	Klf4	2.69e-91	2	1	-1.2505	2.46257
61	Hspa5	2.67e-80	2	1	0.466725	1.69021
806	Ttr	3.82e-60	2	1	-0.936337	1.08012
239	Rhoh	7.93e-57	2	1	-1.08567	2.68366
12	Clk1	3.07e-51	2	1	-1.28573	2.76331
84	Tmx4	1.8e-50	2	1	-1.6122	2.59727
160	Txnip	3.14e-47	2	1	-1.68897	2.57347
772	Dusp1	2.06e-44	2	1	-1.13351	2.77928
592	Eif4a1	4.81e-41	2	1	0.323523	1.49262
97	Serinc3	1.47e-36	2	1	-1.14822	0.729189
784	Hspa1a	2.46e-36	2	1	-0.911764	1.08442
122	Tsc22d3	1.05e-35	2	1	-1.08131	2.26574
687	Srsf5	2.33e-33	2	1	0.196363	1.98288
826	Unc93b1	1.62e-32	2	1	-0.197657	1.18896
525	Hspa8	1.64e-30	2	1	0.112589	1.38157
463	Dnajb1	3.18e-26	2	1	-0.872765	1.60817
276	Actb	5.43e-26	2	1	0.334957	1.45002
450	Hpgd	3.19e-25	2	1	-0.602256	0.829278
783	Brd2	5.44e-25	2	1	-1.70774	2.08091
747	Tra2b	9.18e-24	2	1	-1.62078	2.22809
636	Actg1	9.21e-23	2	1	0.341439	1.74433
287	Tnpo3	4.47e-18	2	1	0.111381	2.36416
424	Zbtb7a	7.8e-18	2	1	-0.913935	2.18136
754	Nfkbiz	1.2e-17	2	1	0.659957	2.26987
571	Rel	1.14e-16	2	1	0.467744	2.3669
757	St3gal6	6.55e-16	2	1	-1.47572	2.0726
436	Ddit3	1.44e-15	2	1	-1.44242	2.3778
657	Gm17750	1.56e-14	2	1	0.654996	2.27691
527	Usp2	1.28e-13	2	1	-1.5814	2.21522
764	Sft2d1	7.7e-13	2	1	-0.96434	0.723082
590	Kdm6b	9.87e-13	2	1	0.577877	2.22226
821	Adrb2	1.17e-12	2	1	-1.18564	2.70747
242	Ythdc1	2.94e-12	2	1	-0.917322	1.58507
633	Socs3	9.75e-12	2	1	-0.400641	2.72455
337	Erf	7.02e-11	2	1	-0.37473	2.17638
735	Tuba1a	1.26e-10	2	1	-0.0489525	1.78974
466	Calr	1.59e-10	2	1	1.21478	0.633018
192	Rgs3	1.91e-10	2	1	-1.27006	2.44386
756	Filip1l	3.53e-10	2	1	-0.21478	1.96993
132	Skil	1.34e-09	2	1	-0.0269254	2.27975
790	Gm26917	1.8e-09	2	1	-0.945299	0.804312
517	Casp4	2.12e-09	2	1	0.031745	2.30339
96	Top1	2.99e-09	2	1	-1.79822	2.32376
498	Rpl23a-ps3	4.27e-09	2	1	-0.822579	0.610983
453	Uba52	7.74e-09	2	1	-0.857423	0.682085
350	Cebpa	1.61e-08	2	1	-1.54693	2.24451
729	Tob2	4.56e-08	2	1	-0.889863	2.05168
698	Eif5	5.66e-08	2	1	-0.242144	2.2344
208	Marcksl1	6.35e-08	2	1	0.868863	2.31981
404	Tnfaip3	1.25e-07	2	1	0.969067	2.28478
472	Herpud1	1.52e-07	2	1	0.501957	1.9344
676	Ifrd1	1.61e-07	2	1	0.987614	2.11468
184	Dnaja1	8.37e-07	2	1	-0.975774	1.50367
616	Stard3	1.85e-06	2	1	-0.907211	2.03039
582	Nlrp3	5.36e-06	2	1	0.714661	2.27979
838	Zfand5	7.68e-06	2	1	0.330599	2.28844
620	Rpl27	1.11e-05	2	1	-0.960213	0.706781
338	Tgfb1	1.65e-05	2	1	-1.00124	0.798643
158	Mcl1	2.78e-05	2	1	0.497943	2.39558
495	Rpl15	2.86e-05	2	1	-0.703742	0.659285
429	Dusp6	0.000104728	2	1	-1.46915	2.63179
522	Icam1	0.000201911	2	1	0.564836	2.24718
314	Chd4	0.000257167	2	1	-0.0445147	2.52168
420	Sbno2	0.000258987	2	1	0.362195	2.32911
791	AY036118	0.000324232	2	1	-0.903382	0.833445
689	Rbm25	0.000486242	2	1	-0.503359	2.24941
577	Sqstm1	0.00116083	2	1	0.694326	1.81257
136	Pcdh18	0.00123236	2	1	-0.559546	0.872146
390	Spn	0.00129433	2	1	-0.0162553	0.521503
465	Ier2	0.00166387	2	1	-0.437507	2.77449
569	Sertad2	0.00226342	2	1	0.10661	2.02038
88	Slc52a3	0.00283738	2	1	0.0486961	0.719615
461	Hmox1	0.00299445	2	1	0.919844	1.62521
273	BC037034	0.00476558	2	1	-0.543571	1.36361
540	Plekho2	0.00476558	2	1	0.773191	2.39785
758	Cggbp1	0.00800585	2	1	-1.66166	1.95038
326	Ube2s	0.00842861	2	1	-1.62707	2.04231
843	Ldb1	0.0125763	2	1	-1.57034	2.06289
833	Slc3a2	0.0162715	2	1	-0.338115	1.14297
282	Hsph1	0.017678	2	1	-1.03489	1.23773
369	Pcf11	0.0192288	2	1	-0.357068	2.23931
206	Sfpq	0.0195825	2	1	0.331924	1.75255
717	Trib1	0.0262817	2	1	0.888702	2.30599
105	Rbm38	0.0392827	2	1	-1.49424	2.00754
43	Vsig8	0.113572	2	1	0.973321	1.83514
18	Ilkap	0.131502	2	1	-0.702077	0.716101
825	Chka	0.141163	2	1	-0.329078	2.46474
186	Phf24	0.15429	2	1	-1.37957	1.7542
761	Cct8	0.180823	2	1	0.580839	1.10264
17	Ube2f	0.183623	2	1	0.605262	2.50043
555	Rassf1	0.199395	2	1	-1.40198	2.17802
788	Tubb5	0.218566	2	1	0.40663	0.568935
11	Sf3b1	0.226705	2	1	0.244016	1.62103
589	Tmem88	0.247255	2	1	-0.0184281	2.56747
296	Creb5	0.259061	2	1	0.254425	2.08083
103	Cebpb	0.29588	2	1	1.04146	1.96855
175	Nfkb1	0.417778	2	1	0.659812	2.45389
301	Dusp11	0.453325	2	1	-1.68153	2.28734
631	H3f3b	0.519219	2	1	0.503116	1.91731
519	Birc3	0.544603	2	1	0.478981	2.30476
493	Gm3002	0.590016	2	1	0.333414	2.16383
697	Yy1	0.657113	2	1	-1.06312	1.81853
789	Ppp1r11	0.700704	2	1	-1.66704	1.91679
185	B4galt1	0.741071	2	1	-0.208426	2.01794
645	Tubb2a	0.809648	2	1	0.189587	1.52937
730	Cenpm	0.955239	2	1	0.310007	0.445435
744	Mgrn1	0.955515	2	1	-0.479137	2.73898
225	Lzic	0.968937	2	1	-1.30549	0.200487
13	G730003C15Rik	0.980595	2	1	-0.860931	0.544312
78	Tmem127	0.980595	2	1	-0.519234	1.87369
123	Htr2c	0.980595	2	1	0.0764096	0.775168
173	Sgms2	0.980595	2	1	-0.905795	0.142055
205	Gm12932	0.980595	2	1	-1.39444	2.60083
226	Gm13070	0.980595	2	1	0.605295	1.76794
397	Utf1	0.980595	2	1	1.12027	1.36667
446	Ckap2	0.980595	2	1	0.556766	0.539089
583	Map2k3	0.980595	2	1	1.11027	2.10869
776	4930539E08Rik	0.980595	2	1	-1.24552	0.829114
856	CAAA01147332.1	0.980595	2	1	0.0755039	0.472526
682	Rps29	0	3	2	3.2475	-4.04751
335	Rps19	2e-277	3	2	3.49673	-4.05006
455	Rpl18a	4.22e-270	3	2	3.29749	-4.50974
306	Rpl32	1.8e-259	3	2	3.45871	-4.28132
489	Rpl13	3.35e-256	3	2	3.45293	-4.90476
546	Eef1a1	6.92e-236	3	2	3.65619	-5.43965
830	Fau	2.65e-223	3	2	3.28309	-4.92631
817	Rps14	1.49e-216	3	2	3.32983	-4.38375
348	Scgb2b27	4.76e-214	3	2	0.538333	-8.88027
327	Rps5	3.09e-213	3	2	3.57587	-4.34906
782	Rps18	3.99e-209	3	2	3.78471	-4.74528
439	Rpl41	1.98e-204	3	2	3.13837	-3.82918
195	Rps6	4.79e-201	3	2	3.52835	-5.25305
659	Rps23	3.26e-200	3	2	3.15235	-4.36956
120	Rps4x	4.2e-192	3	2	3.52521	-5.3079
352	Rpl13a	5.02e-188	3	2	3.23392	-4.7182
15	Rpl37a	1.74e-186	3	2	3.0609	-4.03038
324	Rps9	4.47e-178	3	2	3.42736	-5.15171
351	Rps11	8.87e-176	3	2	3.47857	-4.59563
144	Rps3a1	2.46e-170	3	2	3.61231	-5.35832
64	Rpl35	3.36e-170	3	2	3.48472	-4.00931
379	Rps15a	2.36e-168	3	2	3.48288	-4.44386
587	Rpl26	2.07e-167	3	2	3.48181	-4.60928
202	Rps8	4.68e-163	3	2	3.62428	-4.5307
612	Rpl23	7.68e-155	3	2	3.58499	-4.58641
538	Rplp1	2.06e-148	3	2	3.37587	-4.7178
91	Bpifa2	2.13e-142	3	2	0.5414	-8.87446
258	Rplp0	4.63e-141	3	2	3.69581	-4.74915
153	Rps27	1.78e-138	3	2	2.87372	-3.85669
774	Rpl10a	1.26e-137	3	2	3.51201	-4.66623
343	Rps16	8.96e-134	3	2	3.70822	-4.30917
118	Rpl10	4.42e-133	3	2	3.69197	-5.32578
572	Rps27a	1.63e-129	3	2	3.52703	-4.82512
706	Rpl37	9.31e-128	3	2	2.98612	-4.00551
371	Rps3	1.03e-126	3	2	3.17572	-4.7569
673	Rps7	9.57e-126	3	2	3.64611	-5.2141
279	Rpl21	1.26e-120	3	2	3.4318	-4.95435
751	Rpl35a	5.91e-117	3	2	2.92448	-3.97602
400	Rplp2	1.82e-115	3	2	2.97061	-4.06663
824	Rpl17	6.49e-115	3	2	3.44373	-4.83993
375	Rpl27a	4.56e-114	3	2	3.32645	-4.53862
724	Rpl3	8.21e-114	3	2	3.50404	-5.3893
562	Rpl14	1.77e-109	3	2	3.56138	-4.82434
496	Rps24	9.43e-108	3	2	3.29905	-4.93505
172	Rpl34	2.02e-103	3	2	3.0071	-4.04979
768	Dcpp1	6.06e-98	3	2	0.533633	-8.88561
614	Rpl19	1.4e-96	3	2	3.61089	-4.71281
238	Rpl9	1.61e-91	3	2	3.27382	-5.10395
599	Rpl23a	2.75e-91	3	2	2.75513	-3.67929
261	Rpl6	1.02e-90	3	2	3.40574	-4.87313
771	Rps2	2.13e-89	3	2	3.76994	-5.26278
116	Rpl39	6.04e-88	3	2	3.04053	-4.23006
769	Dcpp2	1.71e-87	3	2	0.535767	-8.90455
529	Rps25	1.75e-84	3	2	3.18967	-4.4482
217	Rpl11	1.48e-78	3	2	3.13997	-4.80226
292	Pip	5.63e-78	3	2	0.561321	-8.89679
406	Rps12	1.1e-76	3	2	3.41792	-4.60435
121	Rpl36a	2.81e-75	3	2	3.06616	-3.96414
421	Rps15	9.36e-75	3	2	3.38591	-4.85253
770	Dcpp3	6.38e-74	3	2	0.522119	-8.93402
179	Rps20	1.1e-69	3	2	3.50857	-4.79743
713	Rpl30	6.48e-61	3	2	3.28796	-4.75336
539	Rpl4	7.13e-61	3	2	3.82999	-5.51693
561	Rpsa	3.53e-60	3	2	3.57227	-5.36157
781	Rps28	8.68e-53	3	2	2.84316	-3.75595
798	Rpl36	2.35e-50	3	2	2.99239	-3.9469
720	Rpl8	1.93e-46	3	2	3.63293	-5.34229
515	Gm10076	1.15e-44	3	2	3.40522	-3.70401
148	Bglap3	4.74e-44	3	2	0.548306	-8.90525
740	Pfdn5	5.59e-43	3	2	3.03297	-4.44962
349	Scgb1b27	1.16e-42	3	2	0.587163	-8.87914
60	Rpl12	1.03e-41	3	2	3.57317	-4.80567
629	Rpl38	2.11e-34	3	2	2.98915	-4.07698
378	Rps13	7.83e-33	3	2	3.37674	-4.56363
3	Rpl7	1.09e-32	3	2	3.80367	-5.58634
440	Rps26	2.12e-30	3	2	3.64207	-5.43982
110	Rps21	2.06e-29	3	2	3.08358	-4.06291
773	Rps10	2e-27	3	2	3.3832	-4.6486
510	Tpt1	6.04e-26	3	2	3.34125	-4.52152
802	Cox7a2l	2.99e-24	3	2	3.63285	-5.259
325	Rpl28	1.12e-23	3	2	3.51595	-4.25888
191	Mup4	2.12e-23	3	2	0.548468	-8.90944
714	Pabpc1	8.17e-23	3	2	3.72142	-5.5062
425	Eef2	1.53e-21	3	2	3.83241	-5.55137
366	Rps17	2.2e-21	3	2	3.55794	-4.34352
483	Cox4i1	2.74e-21	3	2	3.51161	-4.00351
250	Rpl5	1.38e-20	3	2	3.76308	-5.29001
755	Rpl24	1.62e-20	3	2	3.59105	-4.62719
374	Eif3f	6.27e-20	3	2	3.59248	-5.20507
606	Wfdc18	1e-18	3	2	0.536405	-8.86718
228	Rpl22	5.16e-18	3	2	3.32027	-4.23202
7	Rpl31	2.62e-15	3	2	3.11706	-4.38375
355	Rpl18	2.73e-14	3	2	3.83829	-5.32124
14	Eef1b2	6.55e-14	3	2	3.37684	-4.98347
437	Naca	2.94e-13	3	2	3.7552	-5.26513
55	Rpl7a	2.62e-11	3	2	3.35624	-5.2873
554	Rpl29	1.3e-10	3	2	3.3273	-4.91748
198	Uqcrh	6.4e-10	3	2	3.53762	-4.30033
575	Gnb2l1	1.67e-07	3	2	3.5255	-4.90481
574	Npm1	7.73e-06	3	2	3.79108	-5.05062
715	Eif3h	0.0141944	3	2	3.66402	-5.22177
763	Kcne1	0.0193994	3	2	0.561821	-8.89188
318	BC048546	0.0462477	3	2	0.556235	-8.90357
102	Zfos1	0.962621	3	2	2.81659	-3.71676
260	Dtx1	0.980595	3	2	0.512896	-8.83094
778	Gm26885	0.980595	3	2	3.84682	-5.17512
