# Supplementary material for: Microglia aging in the hippocampus advances through intermediate states that drive activation and cognitive decline
Source: eLife. 2025 Apr 29;13:RP97671. doi: 10.7554/eLife.97671 (PMC12040317; doi:10.7554/eLife.97671)
Supplement: Supplementary file 3. — The tables contain the RNA-Seq differential expression analysis of control and LPS activated primary microglia, DMSO and CX-5461-treated primary microglia activated by LPS, and DMSO and TGFB1-treated primary microglia activated by LPS, respectively. The tables contain expression values of genes for the samples that were compared along with mean expression values for all samples combined, log fold change between sample groups, and adjusted p-values. in the RNA-Seq differential expression analysis of control and LPS activated primary microglia, DMSO and CX-5461-treated primary microglia activated by LPS, and DMSO and TGFB1-treated primary microglia activated by LPS, respectively. [file elife-97671-supp3.xlsx]

## Sheet: 24 hour LPS Microglia
	Gene	baseMean	log2FoldChange	lfcSE	stat	pvalue	padj	CTL DMSO	CTL DMSO	CTL DMSO	LPS DMSO	CTL DMSO	LPS DMSO	LPS DMSO	CTL DMSO	LPS DMSO	CTL DMSO	LPS DMSO	CTL DMSO	CTL DMSO	LPS DMSO	CTL DMSO	LPS DMSO	CTL DMSO	LPS DMSO	CTL DMSO	LPS DMSO
1	Acsl1	5394.77	4.14288	0.0933431	44.3834	0	0	556.954	11127.3	612.206	10842	483.499	9571.22	12995.5	564.45	10428.3	627.208	8930.71	738.75	525.161	9614.14	477.731	8083.18	577.982	9218.41	605.982	11314.9
2	Adora2a	1287.21	9.04124	0.207923	43.4836	0	0	5.2449	2823.81	6.02615	2777.97	4.97736	1626.16	3175.63	5.85864	2937.67	5.68177	2313.65	3.4105	5.10655	2892.84	4.82747	2198.63	3.00654	2014.01	8.4415	2931.26
3	Bcl2a1a	3196.55	6.64634	0.110855	59.955	0	0	69.931	7087.04	59.6419	6795.93	49.5007	6052.11	7630.26	46.8172	6031.24	63.808	4533.39	76.3346	73.2464	6860.99	67.2471	7033.71	61.9296	5434.83	65.9608	5837.1
4	Bcl2a1d	7786.43	6.1719	0.114463	53.9207	0	0	253.702	16529.7	231.902	18161.5	197.55	14796.8	18546	202.561	15089.7	144.783	9949.51	218.507	240.085	16298.1	258.634	16777.5	178.924	12685	208.6	14759.5
5	Ccl3	111122	6.19351	0.10522	58.8623	0	0	2846.67	245749	2553.63	242643	3125.87	152152	209791	2762.82	253374	2595.85	203901	2786.8	3142.68	254923	3823	257261	3533.98	170481	2790.22	202200
6	Cd274	4275.04	5.35476	0.137309	38.998	0	0	262.915	8139.91	242.255	10773.8	167.667	6808.98	10794.6	245.067	8656.53	128.546	6940.81	172.538	182.775	8935.18	276.029	6733.65	167.198	6526.9	198.17	9147.3
7	Cd38	1869.19	5.31779	0.12828	41.4546	0	0	91.9579	4061.51	101.843	3110.86	99.0357	3079.82	5045.8	111.145	4078.71	68.0875	3127.97	78.9533	123.941	4411.77	89.2267	3588.02	66.1789	3030.3	88.5683	2930.15
8	Cd40	15151.3	8.07485	0.156079	51.7356	0	0	81.9171	29515.6	131.3	41700.8	156.492	23801.9	32538.1	77.3295	29770.3	118.77	25536	98.0827	160.183	31652.5	143.578	26810.9	67.1687	22677.9	98.7355	37887.8
9	Cd69	6327.7	8.48688	0.130729	64.9197	0	0	32.169	11917.2	36.7574	16384.8	45.2933	14456.8	12400.5	24.0278	10384.6	31.3737	9539.97	29.9861	39.4761	14015.9	45.9813	10115.7	36.8806	12021.5	34.8972	14960.1
10	Cdc42ep2	1878.2	4.93728	0.110789	44.5649	0	0	165.572	3348.27	123.538	4031.96	105.129	2829.34	3594.78	91.6244	3865.11	122.91	3605.86	126.183	138.015	3910.58	86.8029	3530.08	124.203	3013.43	103.318	4647.26
11	Cers6	5943.39	4.20491	0.0909206	46.2481	0	0	685.44	12929.8	583.025	12974.8	518.192	10101.2	11476.5	716.51	11554.8	514.944	9166.36	681.681	604.947	12215.3	695.012	9698.4	519.555	9817.6	593.833	12819.9
12	Cflar	8656.48	2.88012	0.0758324	37.9801	0	0	2428.49	16596.2	1751	17806.3	1682.58	12797.2	16122.5	2099.21	14705.3	2018.54	14517.6	1947.07	2161.92	14979.3	2401.89	14704.4	2200.25	14583.4	2023.71	15602.8
13	Clec4e	47203.6	6.17503	0.163255	37.8244	0	0	1191.28	96647.9	1469.02	96930.6	615.548	61137.2	137412	1490.02	100616	1472.55	76791.4	814.792	1206.92	89212	1733.29	98099.4	1735.28	93209.2	1163.21	81124.8
14	Crlf3	1982.3	2.37921	0.0614469	38.7198	0	0	577.197	3383.56	634.46	3590.75	588.62	3222.09	3177.14	678.707	3220.21	681.433	3023.23	638.689	794.338	3548.68	551.467	3289.81	648.759	3345.79	604.304	3446.85
15	Cxcl1	11527.7	9.06758	0.219568	41.2974	0	0	36.8253	26465.6	52.3987	22920.6	30.2703	8861.8	28539.6	25.3058	28818.7	34.5973	27441.8	24.0181	58.1712	18540.5	78.0121	29143	45.7016	26233.1	51.048	13153.3
16	Cxcl10	27266.7	8.99484	0.168901	53.2551	0	0	95.5685	44773.6	107.285	74349.4	109.702	68127.1	51317.1	51.4414	47710.3	75.6998	41042.1	83.5982	155.945	56429	166.656	48348.3	93.9294	45121.1	138.09	67037.8
17	Cxcl2	45668.5	8.7442	0.13974	62.5747	0	0	174.779	103002	187.972	89340	233.66	76233.2	96027.6	110.215	104487	208.735	90231.2	174.797	328.299	98806.9	267.45	105088	211.245	69069.2	240.979	78947.2
18	Edn1	1155.8	8.85834	0.209515	42.2801	0	0	7.84926	2078.65	8.43434	3222.67	2.76322	1859.98	2842.09	4.8891	2500.72	4.74074	1835.82	3.55478	0	2327.96	3.62331	2021.53	6.00808	1786.66	8.44639	2589.7
19	Fscn1	1338.23	7.93512	0.210809	37.6413	0	0	17.8157	3806.77	10.5001	2581.22	14.7968	2607.39	2032.7	16.8968	2232.42	5.62911	2270.95	12.2662	11.387	3609.65	2.69047	2548.67	5.42697	1902.8	18.5436	3056.14
20	Gbp2	11707.9	7.73066	0.162538	47.5621	0	0	89.1082	23163.9	93.3751	27640.8	87.3464	23867.9	26811.7	109.841	22941	97.527	17549.9	73.4941	102.084	24884.1	247.365	20506.4	97.8877	19007.2	110.773	26675.7
21	Gbp7	3160.02	6.76172	0.173231	39.0329	0	0	46.7052	6703.72	45.0417	6497.62	53.9579	6359.09	7468.46	56.2754	6120.36	33.6423	5228.39	64.2676	77.9938	7181.26	131.292	5738.75	35.79	5188.81	41.134	6127.92
22	Icam1	10661.3	4.55826	0.0963727	47.2983	0	0	1138.76	21102.2	812.926	23351.2	718.915	16986.5	20319.5	849.658	20275	929.122	20062.3	870.027	1116.94	21979.3	731.442	17842.9	821.593	19011.4	697.543	23608.6
23	Ier3	2761.16	5.44681	0.137533	39.6038	0	0	137.843	5900.66	87.9624	4606.17	118.501	3723.4	6210.71	122.016	6782.9	159.831	5134.02	113.348	174.975	6762.03	103.303	6394.66	121.467	3805.69	104.01	4659.75
24	Ifi205	8983.67	8.84355	0.195349	45.2705	0	0	29.7271	18858.3	43.3328	23137.2	36.506	16694.3	22310.3	34.845	17646.9	19.636	12043.8	17.835	58.6208	20265.4	70.5407	16492.9	31.3472	13531.3	57.9859	18292.5
25	Il27	5053.65	9.16503	0.186018	49.2695	0	0	8.58524	10736.5	21.6875	12732.8	18.1732	9429	11020.5	12.3843	10491.8	17.2707	7367.96	9.65632	21.5192	11698.4	30.4331	8836.18	16.2358	6387.26	28.6947	12188
26	Irak3	3364.45	3.18442	0.0761769	41.8029	0	0	772.434	6215.87	531.643	5296.41	621.477	6728.65	6001.68	643.021	5875.03	618.982	6294.35	801.309	733.395	6485.07	710.58	5665.97	567.706	6035.62	671.1	6018.73
27	Irg1	101996	7.61588	0.151201	50.3694	0	0	1140	204189	833.417	228117	514.338	161303	220191	880.68	210185	1142.9	184480	777.121	1283.08	215525	1740.22	190465	1165.28	184085	882.102	231030
28	Lacc1	4028.49	4.04447	0.0935393	43.2382	0	0	486.378	8654.29	487.508	7652.36	432.521	6777.24	7948.7	497.405	8063.82	455.252	6873.79	315.759	483.408	9123.07	495.093	8146.69	456.671	5929.19	506.236	6784.46
29	Lyn	7892.29	2.55048	0.066639	38.2731	0	0	2451.43	15695.5	2185.86	14830	2328.11	13897.7	12630.1	2152.2	12839.5	2395.98	12501	2425.1	2155.26	14731.3	2341.89	12147.3	2500.63	11143.9	2065.26	14427.9
30	Malt1	2003.2	4.56563	0.101706	44.8903	0	0	131.713	3497.45	180.789	4204.47	183.24	3064.12	4081.3	189.227	4722.65	131.194	3871.87	140.507	175.262	4699.95	157.753	3692.02	178.9	3249.15	152.723	3359.73
31	Mmp13	15976.6	8.22811	0.153653	53.5498	0	0	77.8202	45474.8	119.318	34473.8	104.531	25101	24761.8	121.54	34133.2	77.6355	27556.3	103.68	164.707	43315.6	78.4362	32624.4	120.7	20011.5	92.8464	31018.1
32	Nfkbiz	4050.61	4.77058	0.101816	46.855	0	0	355.428	8935.16	242.611	8791.8	324.109	7613.38	6411.42	228.609	8295.08	261.869	6859.42	307.703	332.402	9445.59	250.683	7319.93	273.848	5978.11	286.898	8498.09
33	Nos2	2706.93	9.22762	0.228988	40.2974	0	0	8.77115	3539.89	7.23152	5791.06	11.0692	5928.51	8513.01	5.35568	5273.38	10.3907	4100.52	4.09284	16.6223	5646.13	13.2536	5111.43	4.72906	3856.34	17.9135	6278.88
34	Pde4b	2540.75	4.53974	0.114628	39.604	0	0	249.59	5642.1	160.408	5724.46	182.748	4110.71	4849.36	188.807	4765.44	244.384	4109.37	217.858	290.309	5198.93	169.829	4379.54	165.033	4088.49	239.688	5837.92
35	Pnp	15507.7	4.76111	0.110644	43.031	0	0	919.892	31419.9	1010.95	34006.9	973.11	28554.8	30754.3	877.685	30797.6	1164.59	24949.3	1132.63	1184.42	32084.3	1768.9	28770	980.263	23954.7	1031.05	33819.6
36	Ptges	6050.63	6.54307	0.156298	41.8629	0	0	122.726	15156.8	108.885	11362.8	76.6125	7465.89	7858.99	93.0021	13663.2	147.54	13899.3	111.055	146.502	12261.5	171.586	12845.1	134.403	12385.6	193.466	12807.5
37	Ptgs2	34841.3	9.47295	0.193508	48.9537	0	0	93.4656	94151.6	74.7013	64949.4	81.4756	55886.1	74752.9	80.6082	76640.1	96.9459	68179.8	34.1121	200.414	80270.8	128.333	65565.3	90.1045	53722.7	112.238	61715.2
38	Socs3	3155.42	8.29767	0.179075	46.3363	0	0	25.3294	6123.02	21.6797	6417.73	9.94773	5912.07	5709.08	22.9341	7790.39	26.7357	5716.02	15.2501	31.8923	8391.6	12.0616	5768.04	12.0176	3830.88	29.5275	7242.15
39	Sod2	8669.38	4.19055	0.0861808	48.6251	0	0	1051.44	18326.6	885.262	17089.9	993.78	13478.9	15901.1	918.137	17666.9	768.084	16015.3	1158.86	775.376	17559.5	740.468	17785.4	876.523	15283	815.103	15298
40	St7	778.96	4.31602	0.10874	39.6913	0	0	56.2968	1612.03	58.9563	1305.27	91.3971	1481.86	1309.45	64.0005	1537.61	100.375	1346.45	92.6891	63.3537	1830.98	64.1215	1539.28	77.6393	1418.68	67.2322	1461.55
41	Stard5	2898.82	3.44105	0.088083	39.066	0	0	604.436	5805.96	527.029	5377.47	406.534	5635.49	4424.85	489.551	5287.14	417.028	5164.38	409.362	580.856	5963.56	472.45	4791.12	427.935	4945.02	566.607	5679.56
42	Tnf	63034.3	7.15593	0.170795	41.8978	0	0	688.236	134781	610.997	134605	1212.81	106155	136095	456.207	133587	932.965	120405	1756.06	715.48	128219	757.641	115384	918.43	110740	719.215	131947
43	Tnfaip3	6305.21	5.0246	0.112111	44.8182	0	0	451.926	13758	341.11	13528.3	321.738	9960.46	13234	348.84	12296.3	374.7	11403.8	534.796	401.189	13325.2	251.208	10488.7	369.597	10180	353.411	14181
44	Traf1	6790	6.045	0.112155	53.8985	0	0	208.504	12657.4	194.826	13974.4	128.569	13167.5	14604.9	217.866	13776.9	297.472	13198.6	156.485	189.023	13606.2	238.104	12775	222.927	10819.6	180.386	15185.2
45	Trim13	542.911	3.12009	0.0822943	37.9138	0	0	112.224	798.363	115.332	1026.22	93.7913	932.39	1051.82	98.5336	1003.11	128.311	856.677	115.773	104.566	945.344	116.491	1018.02	126.72	1163.19	115.577	935.767
46	Ccl4	50547.2	4.51817	0.120541	37.4825	1.77743e-307	7.33538e-305	3779.4	92497.1	3316	118797	5462.76	97943.2	89819.2	3329.51	103442	4549.45	76613.7	3700.05	3941.44	110838	5845.62	103193	4798.21	69040.2	3556.58	106481
47	Ccl5	28128.2	8.59525	0.230193	37.3394	3.77254e-305	1.52379e-302	137.021	59945.7	187.9	70226.1	78.9209	39667.6	50378.9	135.464	66601.8	110.294	45043.3	35.5499	239.066	65392.1	182.993	62899.7	127.852	33790.8	224.495	67158.8
48	Csf3	5777.38	9.46712	0.253989	37.2738	4.36735e-304	1.72729e-301	12.9977	10922	12.051	9500.79	20.4213	11923.6	13100.3	19.6679	13648.4	15.2489	10653.1	5.40946	47.0422	17528.5	9.69593	11468.5	10.2822	5077.66	16.9425	11555
49	Slamf7	4476.64	5.96742	0.162407	36.7437	1.46635e-295	5.68107e-293	143.302	8256.28	147.082	13220.4	113.562	7450.68	9660.79	157.082	8965.38	84.0035	5490.06	98.9662	178.314	8827.92	238.213	8440.04	120.966	7215.99	135.542	10588.3
50	Car13	2426.09	3.27035	0.091	35.9379	7.82758e-283	2.97198e-280	425.189	4529.92	453.162	4914.05	379.28	3683.06	5601.55	405.137	4533.51	396.186	3909.22	570.337	440.189	4381.69	551.868	4322.55	479.162	3995.06	453.956	4096.63
51	Batf	984.08	3.77285	0.105419	35.7892	1.62433e-280	6.04633e-278	144.741	1997.61	140.932	1763.54	123.854	1381.37	2075.4	127.014	2006.74	123.003	1770.95	106.467	193.484	2026.95	148.719	1978.34	126.426	1442.45	119.119	1884.5
52	Irak2	3557.03	3.52245	0.0986823	35.6948	4.75626e-279	1.7364e-276	747.009	6575.83	518.568	7512.27	429.02	5469.8	6514.88	613.499	6652.2	606.644	5805.88	501.791	604.364	7067.25	519.668	5572.76	614.547	5915.3	543.856	8355.45
53	Lcp2	5657.4	3.85976	0.109619	35.2107	1.37236e-271	4.91562e-269	737.897	11762.3	556.862	10704.9	586.567	11820	9934.65	631.332	10293.8	992.207	9117.59	946.518	832.855	12022.3	621.156	9113.67	794.156	9844.92	592.433	11241.9
54	Rab20	2555.53	3.59809	0.102405	35.1358	1.91253e-270	6.72361e-268	472.961	5227.9	397.681	5409.02	302.984	3412.69	4750.1	403.298	4919.75	382.266	4398.93	346.578	491.96	5095.16	396.383	4582.92	355.56	3760.21	356.899	5647.38
55	Nfkbib	2138.32	3.26507	0.0932353	35.0197	1.12753e-268	3.89182e-266	457.035	3965.05	388.912	4265.14	337.462	3210.76	3436.95	382.845	4271.57	445.433	3682.06	408.465	467.6	4432.96	404.354	3744.47	367.539	2898.97	375.831	4823.07
56	Isg20	1563.5	7.31085	0.210085	34.7994	2.48378e-265	8.42001e-263	15.1856	2759.96	9.72257	3663.45	20.2287	3298.27	3341.8	10.2435	3088.61	11.9846	2708.01	26.4149	26.7274	3317.17	54.6007	3238.52	15.7488	2145.22	12.24	3505.92
57	Rab11fip1	1448.83	4.45657	0.129066	34.5294	2.90691e-261	9.68154e-259	183.039	3159.66	127.987	2764.2	71.2538	2745.17	3092.74	114.753	2871.76	112.686	2714.99	142.717	139.799	2873.6	94.4745	2729.28	160.474	2009.12	115.743	2753.07
58	Rasgef1b	4618.03	2.68343	0.0783008	34.2707	2.1437e-257	7.01654e-255	1379.67	7655.18	1405.87	10017.1	1327.56	7716.64	8736.69	1159.24	8438	1018.83	6680.01	1240.43	1249.69	7811.56	1306.18	7158.59	1201.65	7090.93	1153.65	8613.16
59	Gbp5	1379.57	9.25601	0.270114	34.267	2.43401e-257	7.83174e-255	5.36675	2488	6.20356	3952.57	10.2915	1886.47	4262.3	7.22064	2636.83	2.01554	1750.69	4.55216	0	2862.66	5.00693	2394.07	1.257	2119.35	0	3196.59
60	Nlrp3	4517.5	5.73361	0.169102	33.9063	5.38331e-252	1.70328e-249	142.293	7908.01	109.551	12090	226.686	8854.93	8675.16	90.8007	8212.68	159.123	6100.18	287.606	143.057	8630.37	145.672	8524	186.284	7754.24	168.169	11941.1
61	Myd88	2939.76	2.64177	0.0780163	33.8618	2.43421e-251	7.57559e-249	794.256	4589.56	731.328	5701.17	718.94	5279.56	5101.12	821.73	4660.91	863.988	4642.42	851.946	1004.38	5496.99	869.462	4480.24	783.132	4653.95	688.793	6061.41
62	Marco	24684	5.2733	0.15619	33.7622	7.08821e-250	2.17036e-247	778.848	55434.9	767.917	47762.8	1017.2	44853	46674.9	983.221	53863.5	1958.15	44585.9	1663.28	1051.39	56071.9	1444.98	45595.3	1786.89	40613.5	988.176	45784.7
63	Clic4	21712	3.02137	0.0896608	33.6978	6.23107e-249	1.87763e-246	4594.28	40479.6	4369.96	47055.2	4007.65	30064.3	42796.4	4017.33	37502.4	5299.53	35923	5618.15	4610.35	41103.2	4510.43	32932.2	5590.09	35766.5	4994	43005.6
64	Nfkbia	8498.44	3.75638	0.112381	33.4256	5.83293e-245	1.73019e-242	1438.97	15802.3	990.626	18667.2	1119.33	14753.9	13567.1	1023.86	17008.3	1141.83	14471.5	1599.18	1405.09	17224.7	1071.48	15545.8	932.422	11766.1	986.04	19453.1
65	Hcar2	2501.88	5.35021	0.160076	33.4229	6.374e-245	1.8616e-242	128.067	4542.82	47.0024	5212.36	111.628	4897.85	4607.51	85.6723	5043.28	172.773	4461.54	125.996	132.562	5472.4	159.568	4535.51	151.47	3903.22	86.6433	6159.81
66	Mtss1	534.671	-3.54723	0.106208	-33.3989	1.42329e-244	4.09389e-242	1170.99	60.6916	1070.87	87.6546	966.507	60.43	56.2062	914.751	87.2056	883.644	124.143	1012.49	1010.49	81.4686	871.995	88.3693	1000.63	106.735	945.95	92.2019
67	Gpr84	7336.02	6.52664	0.196527	33.21	7.73173e-242	2.19073e-239	93.0632	16524.1	110.273	11578.4	167.931	14011.8	12732.3	82.3568	14803.5	280.387	16095	292.894	136.279	17769.1	97.9956	14853.6	178.847	11706.1	127.938	15078.6
68	Il12b	3035.97	9.23373	0.279639	33.0201	4.17778e-239	1.16634e-236	16.5969	7867.05	11.4856	5231.28	9.97747	3562.74	12415	6.38707	5866.11	12.3847	4403.41	5.06588	20.4539	8634.37	6.0649	5474.74	3.87353	2774.9	13.7825	4383.61
69	Gm15280	591.239	4.74114	0.144325	32.8504	1.12501e-236	3.09523e-234	46.5678	1554.33	45.9761	1319.56	55.6354	879.127	1249.91	66.3837	1146.11	30.2898	1014.95	35.6487	44.1581	1036.35	23.3185	989.826	37.0989	1075.71	35.0103	1138.82
70	Hck	5951.85	2.82213	0.0859528	32.8334	1.96423e-236	5.327e-234	1644.03	10769	1132.38	10402.5	1240.96	10502.9	10283	1404.15	11089.2	1737.85	9669.66	1630.09	1577.55	11908	1637.22	9520.02	1477.47	8488.02	1269.67	11653.4
71	Ankrd33b	876.638	5.07129	0.154472	32.8297	2.2191e-236	5.93343e-234	41.8474	1737.53	75.1362	1872.31	72.0407	1557.66	1618.58	31.2553	1592.97	35.8365	1952.76	64.8562	30.3713	1701.44	46.2481	1333.9	55.9854	1412.64	45.7247	2253.65
72	Nfkb2	3807.96	3.93117	0.12028	32.6835	2.68247e-234	7.07279e-232	563.763	7120.69	351.835	7727.15	465.849	6124.6	7824.64	352.697	8306.53	568.647	6717.68	582.29	500.128	8871.65	454.615	6078.72	415.582	4720.47	431.455	7980.2
73	Slc7a11	4809.57	5.5271	0.169281	32.6504	7.90575e-234	2.05593e-231	140.506	11872.2	198.02	6661.27	280.108	4080.09	13151.2	199.158	11162.9	208.208	10947.3	227.784	175.731	8735.48	217.779	9992.47	243.415	10119.7	145.553	7432.49
74	Saa3	17892.3	6.76555	0.207709	32.5723	1.01225e-232	2.59684e-230	333.132	37145.7	398.566	23511	336.405	57494.4	42901.6	414.431	36262	142.908	23726.1	434.934	475.972	46325.7	281.584	41877.5	213.527	20005.4	225.254	25340
75	Spryd7	2969.89	2.94701	0.0908319	32.4447	6.43334e-231	1.62841e-228	733.976	4856.29	729.763	6209.27	728.259	4337.1	6188.01	584.004	5823.04	543.446	4835.1	820.649	544.087	5122.18	692.427	5421.24	703.615	4620.03	730.595	5174.63
76	Ppp1r15a	1684.66	3.86946	0.119706	32.3248	3.14005e-229	7.84351e-227	266.366	3326.82	225.407	4062.45	174.322	1830.18	3557.31	211.196	3308.63	228.486	2984.66	198.758	254.572	3083.21	207.423	2545.26	200.156	3044.28	195.256	3788.44
77	Gch1	1896.71	4.37698	0.135822	32.2258	7.67149e-228	1.89137e-225	185.431	3361.57	155.475	4262.09	227.33	3330.15	3216.16	151.763	3777.12	159.966	3012.22	139.052	141.746	4770.96	263.021	4094.37	185.578	2344.88	136.086	4019.14
78	Ifih1	4913.97	4.84595	0.150475	32.2042	1.53969e-227	3.74736e-225	347.463	9292.39	317.485	11286.5	249.624	11779	10725.1	252.12	8306.44	267.424	6377.06	318.887	359.783	9631.7	621.967	7474.67	314.69	9264.97	260.472	10831.7
79	Il7	380.34	6.82943	0.212561	32.1293	1.71724e-226	4.1266e-224	3.85518	718.128	9.75688	800.738	6.98071	326.943	902.613	5.27716	967.936	3.04279	936.851	9.21843	10.8322	707.527	4.0007	772.546	8.33586	672.251	4.78228	735.192
80	Il1b	63876.9	9.49205	0.295998	32.0679	1.23488e-225	2.93037e-223	213.205	168436	190.626	130732	113.09	73261.5	147567	111.935	159386	165.092	109183	24.0942	402.502	177208	211.104	132071	106.529	61011.6	241.336	116900
81	Mtdh	4161.84	2.83472	0.088421	32.0594	1.6263e-225	3.81156e-223	1064.86	7648.65	956.075	8467.22	1015.36	7215.88	7498.74	973.31	7781.25	1109.26	5146.12	1146.69	1041.89	8677.69	1100.5	6892.43	1048.03	6493.19	779.974	7179.76
82	Gm14446	398.575	7.13781	0.224035	31.8602	9.50139e-223	2.19969e-220	6.99351	479.558	1.81111	881.351	8.86158	947.116	1104.18	6.36737	797.201	1.89975	614.327	6.29661	5.1115	817.136	12.0567	753.437	1.71405	661.254	7.40511	857.43
83	Gadd45b	1099.62	4.77954	0.151324	31.5849	5.96025e-219	1.36325e-216	93.3747	2249.29	89.1739	2471.19	70.0574	1666.42	2049.75	90.1426	2658.96	56.3218	1454.86	100.35	83.8246	2751.88	65.5171	2246.01	52.6621	1322.07	67.8301	2352.79
84	Daxx	2659.26	3.9543	0.125736	31.4493	4.29353e-217	9.70337e-215	329.248	4152.25	293.8	6244.6	267.657	6123.39	4928.93	265.42	4224.91	354.029	4247.61	344.491	400.914	5440.68	435.893	3969.26	271.279	3969.57	268.584	6652.73
85	Stx11	425.573	2.56133	0.082414	31.0789	4.64671e-212	1.0378e-209	146.623	617.276	105.266	829.668	133.825	720.803	759.736	109.977	767.358	116.147	692.778	129.403	110.69	739.895	107.004	656.226	143.284	696.744	127.922	800.826
86	Oasl1	2169.48	7.91795	0.255793	30.9546	2.20466e-210	4.86665e-208	8.56788	2813.68	9.90883	4150.5	19.2421	5640.75	6728.01	16.4558	3755.91	8.94347	4041.65	19.7838	25.0727	3906.27	49.1724	3713.29	5.15951	3770.5	21.0389	4685.64
87	Rab10	1585.41	2.13571	0.0696719	30.6538	2.35468e-206	5.13808e-204	608.968	2922.18	622.51	2773.65	651.272	2226.27	2654.87	542.838	2735.33	480.224	2285.69	541.385	545.719	2738.63	628.056	2618.86	631.793	2444.15	625.127	2430.7
88	Il6	9748.04	9.558	0.311941	30.6404	3.55052e-206	7.65944e-204	28.4378	21777.5	22.8945	18309	21.4969	17670.5	27346.8	8.88989	22444.9	28.7064	15344.7	7.69741	68.4774	22170.5	37.6703	22734.1	22.6699	12198	18.0406	14699.8
89	Slc25a22	1803.32	4.0743	0.133393	30.5436	6.86793e-205	1.46495e-202	187.869	3141.68	154.392	4168.26	181.721	3153.63	3090.35	166.46	3449.88	285.802	3213.11	206.291	212.069	4133.2	246.228	3057.16	224.122	2097.32	158.79	4537.96
90	Psme2	6725.38	3.26252	0.107058	30.4744	5.69112e-204	1.20045e-201	1198.66	12650	1123.37	14294.6	1165.05	11372.3	12586.7	1032.28	12473.8	1215.01	9102.69	1394.92	1321.65	13117.3	1966.23	13156.2	1096.11	10463.4	1191.56	12585.7
91	Tnfrsf1b	32685.7	4.25827	0.140294	30.3526	2.32485e-202	4.84999e-200	4834.31	65858.8	3456.01	64883.3	1908.4	53776.7	65222.6	4184.91	63017.8	2701.65	61755.7	2242.96	4428.77	66355.6	2854.09	55637.1	2688.15	52724.7	3172	72010.3
92	Bcl2a1b	15875.4	4.56566	0.150549	30.3267	5.09292e-202	1.05091e-199	1857.25	33034.2	1605.03	37442.3	832.159	30946.2	32613.3	1207.08	28212.4	1116.91	20326.2	670.743	1396.69	31367.3	1421.99	32970.1	1158.16	26239.1	1608.6	31482.6
93	Prdx5	8928.86	3.45192	0.113939	30.2961	1.28953e-201	2.6323e-199	1707.32	17888.6	1175.13	17660.7	1061.13	12877.3	14546.1	1325.21	18322.3	1965.99	13536.2	1471.47	1693.3	19711.4	1676.52	17545.5	1562.63	13273.4	1322.01	18255
94	Tap2	3158.77	3.32711	0.110065	30.2287	9.9489e-201	2.00925e-198	588.239	6274.93	512.423	6966.52	458.561	5018.38	6097.84	558.841	5788.94	595.618	4535.89	489.962	651.613	6286.17	712.263	4660.43	571.419	4254.43	595.416	7557.59
95	Itga5	7540.96	3.16436	0.104753	30.2078	1.87214e-200	3.74113e-198	1473.89	14109	1438.47	14142	1231.51	12786.1	14167.2	1166.35	13394.1	2048.51	14005.1	1654.89	1516.62	15211.7	1280.64	11421.5	1928.29	10648.8	1390.8	15803.6
96	Pdxk	2294.98	-3.82904	0.127078	-30.1314	1.87783e-199	3.71342e-197	4561.78	177.715	4193.69	233.251	4651.13	334.505	387.547	3739.3	253.467	3527.56	387.335	5960.07	4844.3	306.788	3906.81	250.527	3493.11	340.559	4005.81	344.39
97	H2-M2	3526.17	8.36717	0.27809	30.088	6.96452e-199	1.36304e-196	33.4155	9315.56	28.4147	7704.05	14.3746	1653.12	12256.6	19.1199	7690.35	18.5477	5893	9.62206	46.7497	8544.13	10.593	6485.52	13.6077	4688.54	23.3718	6074.75
98	Birc3	2179.79	3.23506	0.108069	29.9351	6.86881e-197	1.33059e-194	509.772	4464.98	388.337	3844.76	260.772	3838.8	4445.72	408.606	4166.73	460.905	4116.4	472.596	501.205	4106.39	367.831	3603.8	334.716	3484.74	490.705	3328.1
99	Mx1	4456.86	6.69308	0.224993	29.7479	1.84348e-194	3.53502e-192	55.0199	8044.54	76.7894	13696.4	120.969	9739.2	9370.17	62.7683	8094.81	48.6227	5473.53	74.2918	62.3389	8934.32	221.534	6868.28	55.1975	6619.56	84.3472	11434.6
100	Nrp2	9547.61	2.13933	0.0719532	29.7323	2.93833e-194	5.57813e-192	3857.64	15434.4	3139.16	16688	3501.32	12988.9	16757	3417.05	16061.8	3439.22	15349.9	4148.21	3831.71	16730.8	3016.29	14170.9	3809.85	14203.5	3153.37	17253.1
101	Peli1	2128.39	3.01357	0.101892	29.576	3.04103e-192	5.71594e-190	472.469	2870.59	482.513	4798.28	513.635	3532.89	3551.26	489.595	3727.39	394.767	3270.74	332.729	565.589	4358.45	557.736	3847.63	451.677	3852.46	444.477	4052.97
102	Rab3il1	920.512	-4.4991	0.152293	-29.5425	8.20336e-192	1.52679e-189	2157.28	65.5588	1645.15	67.0124	1780.77	82.1745	50.2889	1546.89	79.3892	1680.17	136.492	2135.47	2427.1	108.941	1322.64	54.7321	1404.67	76.7484	1513.28	75.4935
103	Psma6	4194.61	2.40951	0.0823819	29.2481	4.75136e-188	8.75726e-186	1188.84	7717.24	1212.9	6681.59	1501.46	7007.37	6078.38	1032	7259.94	1427.49	6891.37	1644.34	1219.89	7700.66	1427.43	8074.82	1361.23	6203.36	1265.37	6996.48
104	Gramd1a	2164	3.66981	0.125711	29.1924	2.42371e-187	4.42421e-185	359.348	4310.58	345.739	4005.25	358.037	4618.92	2590.02	280.118	4241.4	294.736	4111.73	310.652	363.073	5668.67	265.072	3625.86	296.51	2557.53	278.256	4398.42
105	Snx10	3752.49	2.28808	0.0783985	29.1853	2.98174e-187	5.39099e-185	1367.3	5713.59	1295.5	6879.34	1247.44	6065.01	7729	1146.9	5952.6	936.551	5515.31	1353.84	1304.24	6130.56	1478.78	6110.74	1298.43	6153.37	1332.32	6038.9
106	Samsn1	1230.49	2.6954	0.0924863	29.1438	1.00057e-186	1.79197e-184	411.733	2553.46	300.286	1742.53	335.543	2269.86	2088.13	309.473	2304.66	266.301	1839.66	325.884	315.085	2419.91	375.663	2352.18	355.32	2020.52	297.689	1725.96
107	Shisa3	959.492	7.38599	0.253592	29.1255	1.70779e-186	3.02997e-184	12.3216	2851.98	11.9499	1298.87	27.5242	995.18	2331.22	8.73955	2294.79	5.35422	2195.39	8.20029	14.1417	2628.25	7.96652	1949.49	5.208	1307.23	14.3812	1221.64
108	Ripk2	755.26	3.00861	0.103309	29.1223	1.87601e-186	3.29761e-184	155.815	1123.42	142.971	1576.44	203.585	1157.6	1283.57	152.658	1202.77	154.481	1185.64	168.366	161.809	1452.6	207.768	1285.8	195.435	1486.25	125.683	1682.52
109	Ube2f	1767.91	1.84765	0.0635703	29.0646	1.00579e-185	1.75173e-183	821.719	2860.27	765.474	2833.29	719.783	2119.21	2900.44	764.5	2932.91	814.962	2663.26	777.7	697.774	2934.47	767.996	2999.96	831.296	2751.17	725.368	2676.59
110	Naa25	1220.05	2.7018	0.0933956	28.9286	5.21976e-184	9.00836e-182	294.283	2283.83	257.339	2218.9	352.944	1991.34	1967.59	253.433	2012.15	327.267	1774.62	415.224	341.138	2489.17	363.839	1974.04	341.392	2035.27	300.12	2407.18
111	C3	10805.2	4.07704	0.141793	28.7535	8.18905e-182	1.40055e-179	1802.14	23561.2	744.555	20383	894.657	23765.6	24252.5	1212.45	20549.1	1160.32	19553	1393.15	1276.72	20040.2	1577.15	17985.2	1195.86	13814.1	832.389	20110.2
112	Slc28a2	1553.15	4.89358	0.17037	28.7232	1.95745e-181	3.31788e-179	50.6792	2138.82	119.605	4219.44	111.317	3998.12	3002.14	70.3462	3252.93	128.696	2274.73	122.778	114.02	2983.37	100.983	2471.91	104.023	1822.77	89.1803	3887.1
113	Usb1	2335.16	3.09787	0.108088	28.6606	1.18434e-180	1.98969e-178	531.77	3506.77	482.816	5217.15	361.565	4120	4365.68	494.051	3943	453.995	3186.18	446.092	584.435	4642.12	601.341	3669.78	483.382	3654.5	456.029	5502.53
114	Tma16	1672.4	4.54887	0.159317	28.5523	2.63316e-179	4.3849e-177	139.897	3583.34	137.958	2959.79	194.128	1508.04	4029.37	129.996	3884.09	81.1242	3157.18	165.171	117.13	3415.68	131.404	3726.84	151.496	3505.73	116.353	2313.26
115	Denr	2450.27	2.92719	0.102635	28.5203	6.56562e-179	1.08384e-176	430.26	3597.86	554.565	4755.72	514.445	5029.7	4918.88	533.491	4224.65	563.906	3449.87	772.706	447.128	4445.47	672.979	4396.3	566.967	4294.51	638.94	4196.99
116	Tgm2	1496.38	4.67937	0.164319	28.4774	2.23199e-178	3.65277e-176	93.3576	3238.54	60.0753	2332.17	128.979	2533.65	4096.22	90.4764	3266.96	178.402	2941.83	145.721	79.2917	2935.59	133.799	2512.32	132.743	2200.56	78.0013	2748.97
117	Slc7a2	4075.6	6.83688	0.241511	28.3088	2.69301e-176	4.36959e-174	89.6316	8566.36	95.6133	6519.27	82.6446	10290.9	17828.9	88.1914	8316.91	36.1403	5804.44	94.5126	83.3905	7679.56	30.7416	5292.09	35.9832	4285.1	69.6856	6222.03
118	Ppfibp2	2082.02	2.6717	0.094694	28.214	3.93892e-175	6.33699e-173	686.935	3654.39	439.336	3660.87	600.048	2832.92	3366.93	443.189	3956.51	552.469	3582.47	643.065	646.995	3414.14	659.067	3713.26	508.208	3913.82	475.189	3890.62
119	Cfb	1175.82	6.00666	0.212947	28.2074	4.75107e-175	7.57935e-173	29.4517	2221.36	35.1169	2027.43	16.5665	1882.92	4008.21	56.7141	2525.25	24.937	1828.13	22.4031	52.9926	2542.79	27.3937	2202.92	29.0199	1597.44	74.1761	2311.18
120	Lad1	311.215	8.37403	0.297011	28.1943	6.86295e-175	1.08572e-172	0.63589	632.457	0.87567	688.888	6.52119	748.012	436.194	3.98141	703.215	2.92048	703.172	0.946687	0	595.63	0	632.223	1.29748	533.037	6.46232	527.829
121	Azi2	2163.53	2.41358	0.0856718	28.1724	1.27358e-174	1.99815e-172	725.079	3635.55	729.715	4357.47	565.433	3848.94	4152.21	679.243	3690.34	605.063	2867.1	669.195	786.982	3803.35	825.851	3401.63	666.877	3158.97	596.477	3505.05
122	Cxcl9	384.12	7.70827	0.273715	28.1617	1.72509e-174	2.68436e-172	9.62464	1052.08	3.01309	1170.63	4.9784	574.348	589.524	0.9757	862.344	1.89262	561.025	2.2787	5.10876	916.072	4.82528	695.961	2.1481	470.27	6.32872	748.958
123	AA467197	2369.47	4.44102	0.157764	28.1497	2.4144e-174	3.72642e-172	153.085	4113.89	212.438	5206.87	212.404	5025.37	7220.38	171.833	5213.3	204.361	2541.47	208.54	166.668	3995.09	265.374	5297.06	247.692	2800.2	244.947	3888.44
124	Igtp	3651.35	4.99419	0.177434	28.1467	2.6274e-174	4.02246e-172	157.238	6726.5	188.276	8942.58	202.625	6795.45	7035.91	164.23	6644.8	183.844	5494.37	227.766	285.486	7653.5	497.3	6104.61	166.647	6183.11	157.346	9215.42
125	Serp1	11730.1	2.50265	0.0891451	28.0739	2.04074e-173	3.09932e-171	4080.52	22956.3	3444.62	21702.6	3510.96	21566.9	16169.4	3498.35	19120.2	2389.97	18322.6	3427.44	3884.07	22750.3	4012.51	19354.8	3420.42	19650.5	3521.95	17817.8
126	Ccdc86	1625.21	2.82672	0.100782	28.0478	4.24703e-173	6.39886e-171	380.61	2699.71	325.924	3324.5	361.737	2577.99	2741.18	294.751	2890.99	459.451	2634.06	463.904	418.706	3158.31	553.305	2712.66	385.495	2466.1	380.138	3274.58
127	Cttnbp2nl	962.181	-1.67933	0.0600578	-27.9619	4.72631e-172	7.0649e-170	1453.89	434.286	1376.78	455.834	1390.5	492.865	479.777	1358.76	457.466	1471.35	452.3	1617.71	1362.78	480.713	1580.77	433.254	1648.96	447.125	1411.13	437.356
128	Klf6	9553.79	2.10115	0.0751763	27.9497	6.65445e-172	9.86938e-170	3784.91	15577.5	3791.12	18263.1	2751.27	16135.8	15997	3578.93	15117.9	3556.34	13351.8	3125.27	3637.79	15711.5	3786.85	14206.3	4202.04	14299.2	3911.4	16289.7
129	Rabgef1	1098.41	2.3202	0.0833211	27.8465	1.18632e-170	1.74583e-168	311.681	2093.48	420.197	2058.67	375.268	1526.5	2035.23	369.191	1862.67	381.71	1609.56	417.893	328.099	1921.14	371.315	1629.65	357.851	1569.13	319.385	2009.62
130	Enpp4	668.476	3.68983	0.132749	27.7955	4.91527e-170	7.1778e-168	108.044	1154.95	85.8428	1476.98	71.7906	1185.63	1253.87	83.5757	1180.9	68.5906	1130.63	71.6357	92.4044	1185.89	168.018	1090.61	98.0971	1400.55	126.451	1335.06
131	Adamts4	437.388	8.19351	0.295172	27.7584	1.3801e-169	1.99999e-167	0.985761	1263.33	1.8345	738.199	5.39105	741.707	736.219	2.79447	814.724	8.50186	1143.79	1.23348	10.0624	1250.37	1.14677	668.233	1.22777	606.965	2.37054	748.674
132	Slfn4	609.016	7.01961	0.253953	27.6414	3.54285e-168	5.09527e-166	10.9874	1313.76	5.8565	1267.96	9.26528	1750.79	1536.1	10.178	1161.39	6.91092	748.924	8.58756	6.2122	1502.59	24.5934	1230.28	2.92438	479.406	12.1118	1091.48
133	Samhd1	6367.23	3.35325	0.121323	27.6391	3.77185e-168	5.38382e-166	1337.02	11091.1	1194.7	14985.2	859.644	11227.2	11867.9	1208.66	11185.8	872.569	8984.38	959.775	1340.07	12182.5	1650.85	10237.8	946.189	10296	993.024	13924
134	St3gal3	663.371	3.79291	0.13764	27.5568	3.66681e-167	5.19483e-165	129.21	1466.94	68.4241	1260.36	75.5426	832.941	1137.39	102.621	1467.69	94.3109	1368.76	57.1711	91.5598	1373.31	80.4397	1234.12	103.764	940.303	93.4113	1289.14
135	Ms4a6d	8979.81	2.91865	0.1061	27.5084	1.39212e-166	1.95762e-164	2283.28	19493.1	2002.95	17193.1	1830.1	13762.5	16213.7	1999.83	16901	1762.82	13276.9	1783.25	2238.8	18113.4	3096.38	17075.9	1996.71	12694.3	1994.16	13883.9
136	Nfam1	1043.64	-4.47408	0.162674	-27.5034	1.59992e-166	2.2333e-164	2357.03	79.6051	2042.11	43.8384	1436.06	93.4347	62.2898	2123.85	62.7954	1982.18	140.288	1787.76	2522.69	122.022	1863.55	80.0196	1913.18	137.04	1935.28	87.8083
137	Nod2	292.949	4.15149	0.150983	27.4965	1.93447e-166	2.68058e-164	33.0147	673.571	23.6001	608.3	28.2516	447.354	641.477	48.8717	516.245	36.7894	679.721	21.6454	25.5507	593.438	33.5094	471.541	34.5696	380.807	26.6413	534.09
138	Psma5	3402.49	1.86093	0.0677105	27.4836	2.75644e-166	3.7919e-164	1451.88	5401.2	1449.02	5943.03	1382.57	4170.79	5775.05	1353.43	5373.19	1470.21	4720.28	1643.37	1525.33	5507.45	1589.33	5959.47	1458.13	4984.75	1370.23	5521.12
139	Ccrl2	709.98	5.15759	0.187693	27.4789	3.13844e-166	4.28634e-164	56.79	1318.96	32.5411	1607.34	28.7547	841.952	1845.97	50.308	1424.99	24.6304	1255.26	25.1416	71.4743	1501	49.4942	1395.34	21.0427	1182.22	35.884	1430.5
140	Plaur	5122.87	3.9578	0.144813	27.3305	1.84201e-164	2.49776e-162	677.636	10909.4	495.909	9848.72	453.822	7162.46	7628.63	495.597	10757.9	804.561	8964.32	814.857	676.809	13613.6	439.676	9369.77	776.605	6790.95	555.637	11220.5
141	Lrmp	372.904	-2.9539	0.108578	-27.2054	5.60146e-163	7.54171e-161	625.709	93.9955	646.862	71.6394	651.216	130.187	77.3979	576.512	74.3713	759.65	65.4739	695.32	683.827	84.4523	600.93	63.1073	701.061	99.7714	660.038	96.561
142	Csf2	797.864	9.58183	0.35237	27.1925	7.96323e-163	1.06461e-160	1.70676	2171.45	3.01719	1115.1	2.2037	769.781	2053.79	1.49751	2277.46	0	1485.73	0.459854	7.58654	1967.33	3.67482	2092.67	2.99286	741.406	1.06575	1258.35
143	Slc7a8	3664.79	2.72969	0.100455	27.1732	1.3473e-162	1.78861e-160	862.962	5870.16	836.445	7541.14	939.744	5997.56	7443.54	727.481	6227.26	1236.62	5960.51	1134.98	871.974	6659.13	877.209	5480.15	1098.82	5167	1012.7	7350.43
144	Ncf4	2783.5	1.30543	0.0480846	27.1487	2.62325e-162	3.45831e-160	1747.14	3851.84	1661.38	3846.11	1419.35	4191.2	4106.26	1606.2	3783.99	1699.45	3860.57	1573.76	1706.42	4028.03	1513.38	3796.79	1661.09	4053.08	1451.68	4112.29
145	Rnasel	484.757	-3.72846	0.138132	-26.992	1.83659e-160	2.40454e-158	1026.34	75.9249	1028.96	43.1484	976.021	76.4459	82.3899	840.939	70.9315	703.753	134.299	748.346	1073.44	63.0763	806.352	55.1315	745.128	57.4612	1028.94	58.1215
146	Casp4	1320.24	3.13097	0.116129	26.961	4.23642e-160	5.50851e-158	287.29	2121.19	313.144	2959	263.787	2510.37	2781.21	284.389	2188.63	161.687	1718.56	274.033	335.062	2320.07	325.124	2444.56	236.076	2158.53	230.487	2491.63
147	Ms4a4c	1531.21	6.94601	0.257776	26.9459	6.37641e-160	8.23468e-158	13.2653	3056.04	44.6989	3388.31	24.0256	5334.81	3979.45	29.0282	2869.91	10.2034	1624.51	18.2161	35.6533	3124.45	48.7744	2891.17	17.7016	1558.43	8.86971	2546.58
148	Dnaja2	4776.96	2.46171	0.0916619	26.8564	7.0948e-159	9.10052e-157	1402.69	7177.11	1381.2	9628.04	1317.64	8907.49	9649.85	1236.13	7334.6	1542.39	6264.8	1798.41	1321.94	7429.18	1428.22	7217.59	1682.86	8307.17	1565.25	8946.64
149	Cd44	8824.19	2.21019	0.0823711	26.8321	1.36422e-158	1.73815e-156	2929.01	15839.2	3174.69	16013.2	2780.1	10600	16492.5	3026.21	14169.4	3194.33	15142.4	2999.62	2659.09	15037.1	3261.56	13118.3	3851.56	14044.2	3477.53	14673.8
150	Tet2	922.927	2.25454	0.0841199	26.8015	3.10452e-158	3.92909e-156	394.904	1618.55	345.91	1658.06	310.124	1733.69	1469.71	338.115	1568.87	274.328	1336.87	310.785	364.87	1433.76	239.449	1338.37	338.6	1518.27	276.822	1588.48
151	Gm5345	233.931	5.26414	0.197233	26.6899	6.15834e-157	7.74238e-155	12.8745	557.063	10.8437	380.079	10.4627	425.616	669.273	19.819	513.044	12.4756	428.779	13.3864	10.1254	485.774	14.6097	371.357	3.41779	323.166	10.6287	405.831
152	Slco3a1	1156.05	6.47269	0.244049	26.5221	5.39487e-155	6.73791e-153	16.1778	2134.69	9.84421	2570.92	50.8493	1748.27	2010.3	37.4152	3109.55	61.8211	2013.67	21.0081	20.0349	2151.04	19.0404	2273.34	12.4133	2009.89	14.5901	2836.04
153	Bambi-ps1	378.12	4.34896	0.164021	26.5147	6.56877e-155	8.15043e-153	29.6419	681.889	36.9225	998.219	35.7965	782.901	741.566	39.4567	776.528	40.2176	450.213	26.976	49.1507	772.611	51.5209	635.892	20.8836	481.439	31.8486	878.733
154	Mmp14	1720.94	5.47491	0.206935	26.4571	3.02132e-154	3.72446e-152	163.466	3311.12	70.5059	3782.2	61.3874	2688.55	3581.82	76.1623	3908.87	42.6132	3210.23	89.3227	120.004	4138.27	47.0679	3056.6	51.1112	2232.71	35.8764	3750.93
155	Kpna3	3213.05	2.66014	0.10064	26.4321	5.85678e-154	7.17323e-152	811.203	5909.31	893.092	7300.46	950.808	4700.28	6519.34	734.797	5054.18	701.926	4471.54	1048.52	736.441	5563.26	985.665	4974.64	1027.88	5432.04	879.925	5565.74
156	Steap3	362.946	-2.73465	0.10347	-26.4295	6.27908e-154	7.64116e-152	554.597	95.8078	534.168	98.57	591.88	112.326	81.068	539.462	83.1551	744.536	127.578	631.925	718.036	85.8603	652.944	90.338	634.43	102.55	693.704	85.9752
157	Arl11	1133.36	-3.28165	0.124178	-26.4269	6.7221e-154	8.12817e-152	2514.52	197.134	2187.89	201.993	1350.32	180.169	287.258	2278.17	205.292	2002.82	170.29	1516.88	2444.8	255.385	2401.02	207.469	1895.48	195.028	1974.08	201.155
158	Tor1aip2	4352.42	2.62635	0.099726	26.3357	7.49218e-153	9.002e-151	1152.34	7692.07	1105.92	8441.63	944.951	6847.25	8322.27	1034.78	7766.71	1125.05	6376.9	1359.91	1190.06	7916.95	1846.2	7034.33	1242.43	6831.85	1140.69	7676.06
159	Hdac5	590.698	-3.44659	0.130989	-26.312	1.39833e-152	1.66955e-150	1388.47	63.88	1185.33	106.838	832.101	106.972	105.902	1085.9	82.9568	1086.47	77.013	962.24	1344.34	92.9256	953.396	76.7384	1007.08	145.386	989.082	120.95
160	Fpr2	1372.34	5.99521	0.227903	26.306	1.63691e-152	1.9422e-150	28.0377	2853.51	25.6632	3195.71	51.0429	2473.96	3297.32	31.4082	2858.45	28.7547	1830.8	109.519	37.9889	2853.97	54.2846	2793.57	26.7736	2090.35	22.3462	2783.39
161	Procr	1916.54	5.175	0.197377	26.2188	1.62026e-151	1.9105e-149	111.601	3942.03	46.67	2700.38	77.1266	1791.17	5033.06	86.8054	4957.86	169.231	4222.58	123.564	141.095	3651.29	91.9306	4875.7	106.862	3321.18	81.0903	2799.68
162	S1pr1	439.003	-3.68244	0.140484	-26.2125	1.91561e-151	2.24481e-149	735.28	47.8043	845.476	72.7939	741.298	44.0193	69.4525	740.305	43.442	1014.13	94.674	551.177	826.502	57.2582	878.021	69.7852	883.831	76.7455	917.509	70.548
163	Sesn1	640.81	-4.50612	0.171945	-26.2067	2.22643e-151	2.59304e-149	1726.15	30.5637	1335.37	40.2507	1104.46	74.891	45.9493	1349.03	56.8777	822.066	53.3724	1092.41	1790.2	72.7669	965.964	38.7076	883.791	57.5498	1215.91	59.9205
164	Il1a	32165.5	9.35006	0.358304	26.0953	4.11923e-150	4.76826e-148	142.921	94636.3	106.66	48857.5	50.8442	23242.2	97477.5	98.3764	77920.3	90.1637	59063.8	13.2213	253.688	101196	90.65	65621.7	54.9289	30244.7	87.6891	44061.1
165	Pwp1	1584.1	2.24671	0.0861224	26.0874	5.07318e-150	5.83693e-148	506.963	2932.81	483.297	2928.01	468.968	2136.3	2680.75	450.659	2481.81	641.134	2443.32	656.793	545.102	2876.27	521.389	2566.78	645.102	2543.84	588.815	2583.9
166	Acot9	1933.14	1.85261	0.0712335	26.0075	4.0691e-149	4.65348e-147	849.694	2813.32	837.1	3206.28	621.928	2547.08	3229.43	829.527	3035.89	803.189	2923.34	807.834	950.191	3206.82	882.035	3072.15	896.826	3113.73	920.815	3115.63
167	Rasgrp3	522.927	-6.28105	0.241791	-25.9771	8.98028e-149	1.02085e-146	1228.71	0	922.14	4.47434	624.291	35.0288	10.3932	1171.46	8.56059	1046.95	18.8946	1013.78	1310.94	5.10883	984.801	13.5703	1111.11	23.0696	917.1	8.16758
168	Xkr8	949.085	3.94795	0.152505	25.8873	9.25456e-148	1.04577e-145	188.907	1909.85	71.5528	2215.79	87.781	1847.69	1671.38	100.233	1685.59	158.759	1422.86	129.362	98.6298	2031.56	77.2713	1632.06	140.722	1334.07	106.847	2070.77
169	Nt5c3	1112.18	3.07769	0.118955	25.8728	1.34859e-147	1.51489e-145	167.997	1550.67	248.616	2850.79	283.909	2304.82	1868.48	225.844	2090.35	247.49	1390.95	258.208	226.064	1985.83	271.335	1981.3	228.702	1705.82	198.19	2158.3
170	Mcoln2	2559.09	2.53217	0.0982015	25.7854	1.29145e-146	1.44217e-144	896.983	4384.84	869.807	3814.11	637.037	2951.41	5243.76	748.503	4945.26	687.373	4262.65	690.052	882.784	4089.84	775.81	4745.01	674.296	4794.27	689.145	4398.82
171	Milr1	4119.89	2.311	0.0897535	25.7483	3.36663e-146	3.73755e-144	1075.72	6866.76	1281.04	7785.07	1381.74	6163.34	6423.41	1134.78	6854.66	1536.13	5810.03	1481.19	1259.22	7269.76	1829.22	7591.19	1470.19	6253.81	1376.33	7554.23
172	Ddx24	1675.88	1.88014	0.07308	25.7272	5.80412e-146	6.40612e-144	734.475	2430.81	625.304	2772.59	686.225	2657.98	2666.59	632.807	2623.82	704.065	2625.6	905.851	748.577	2858.12	808.481	2367.05	681.055	2475.88	631.186	2881.24
173	Fcgr2b	10490.5	4.33752	0.169092	25.6519	4.02717e-145	4.41918e-143	1549.21	23158	877.836	18866.9	554.02	15039.9	18682.4	1225.84	22115.3	1028.13	20453.4	456.253	1363.83	22439.1	1139.42	21899	798.887	17162	904.482	20096.1
174	Rel	1540.14	2.3179	0.0905513	25.5977	1.61847e-144	1.7658e-142	590.735	3100.01	523.083	2911.99	507.217	2490.23	2243.41	571.049	2608.56	380.054	2099.56	484.043	550.377	3060.82	518.735	2528.07	514.927	2105.28	504.279	2510.4
175	Slfn1	210.485	6.96214	0.272107	25.586	2.18368e-144	2.36886e-142	0	397.032	1.80662	491.356	3.86541	502.998	451.092	3.9155	541.103	0.949039	275.881	2.89498	3.82059	538.717	13.292	370.789	3.00132	226.697	3.16848	377.315
176	Pstpip2	1113.88	3.13221	0.122637	25.5404	7.01868e-144	7.57061e-142	316.879	2008.25	169.935	1703.87	185.763	1540.02	2474.36	297.17	2278.49	197.167	2153.53	241.358	241.13	2271.55	257.236	1955.41	201.789	1832.32	173.147	1778.25
177	Snx24	232.491	-5.12646	0.200837	-25.5255	1.02634e-143	1.1008e-141	428.537	28.6539	511.559	7.32481	370.844	8.26545	11.8779	423.842	12.6741	512.248	20.5366	317.724	480.883	14.7852	497.136	4.67163	453.801	24.3744	512.787	7.28739
178	Pnp2	223.888	7.13412	0.280044	25.475	3.73084e-143	3.979e-141	0.866275	394.985	1.80831	488.803	4.4164	618.009	179.686	5.90569	435.039	1.90773	454.784	3.97303	1.2715	411.71	3.63848	540.41	3.85656	382.655	0	544.04
179	Psmb10	2870.13	3.28458	0.12917	25.4284	1.22539e-142	1.2996e-140	649.634	4948.85	472.987	6691.91	444.672	4656.24	5370.35	472.683	5777.87	516.249	3918.96	483.331	654.246	5265.45	764.182	5110.87	399.093	3649.1	498.026	6657.9
180	Syk	6386.54	2.99451	0.117818	25.4164	1.66017e-142	1.75092e-140	1846.11	11855	1558.7	11748.4	1338.52	10742.3	12055.1	1699.05	11631.6	1328.68	10765.5	793.373	1856.01	11688	1288.98	10937.9	1253.93	9305.6	1286.16	12751.8
181	Dbnl	3105.59	2.44088	0.0960516	25.4122	1.84718e-142	1.9374e-140	1000.99	5020.06	898.09	5803.61	832.302	4793.51	5521.6	803.084	5519.65	1172.19	4807.18	829.187	1137.38	5987.16	1021.8	4503.35	1003.91	3958.87	972.47	6525.44
182	Serpina3f	130.277	6.61971	0.260676	25.3943	2.91226e-142	3.03771e-140	4.29715	216.23	1.78037	296.256	7.15014	336.693	260.464	2.88878	240.677	0.933735	213.181	1.75236	4.12377	288.156	1.30271	229.492	1.38804	192.227	2.07975	304.459
183	Osm	1388.05	4.02212	0.158624	25.3564	7.63943e-142	7.92497e-140	209.966	2644.43	132.071	2363.26	117.367	1710.81	2907.25	101.71	2898.24	255.055	2669.36	124.614	164.261	3328.94	126.999	2388.31	203.373	2011.93	179.508	3223.59
184	Mlkl	1386.83	4.30632	0.169972	25.3354	1.30274e-141	1.34409e-139	79.525	2540.12	100.311	2816.3	116.696	2469.63	3404.41	79.0239	2600.79	123.31	2138.31	170.876	110.572	2920.58	265.652	2557.32	153.806	2057.5	139.708	2892.09
185	Nfkbie	903.298	2.93008	0.11573	25.3182	2.01212e-141	2.06476e-139	284.796	1811.01	187.412	1739.55	163.677	1694.13	1797.18	240.814	1676.12	224.532	1305.01	224.438	268.016	1752.84	173.842	1368.32	164.042	1284.36	166.762	1539.1
186	Tap1	4394.92	4.25407	0.168308	25.2755	5.94039e-141	6.06303e-139	465.81	7847.03	375.053	10911.2	337.981	7576.63	9131.94	348.299	7802.75	381.03	6881.95	361.604	483.256	9052.2	918.372	6342.56	371.142	6398.48	344.219	11566.9
187	Casp1	3059.88	2.60711	0.103177	25.2684	7.11518e-141	7.22324e-139	777.664	4776.74	758.63	5938.1	881.761	6001.49	6282.75	705.148	4763.31	784.383	4057.52	921.188	893.216	5161.6	1289.76	5246.35	807.538	4810.08	820.122	5520.21
188	Nmi	912.468	3.64933	0.144478	25.2587	9.09766e-141	9.1867e-139	81.1117	1689.13	117.526	2026.54	145.619	1707.29	1906.54	118.278	1633.19	118.35	1041.69	167.078	115.883	1880.07	231.689	1604.57	134.626	1551.47	118.431	1860.28
189	Gpd2	2080.55	3.39653	0.13503	25.1539	1.28051e-139	1.2862e-137	283.577	3020.35	287.99	4476.67	379.201	4619.44	3963.22	272.33	3879.91	324.929	3186.17	411.811	344.294	3909.57	388.279	3256.57	292.95	3498.34	643.463	4171.99
190	Lmo4	1206.17	3.01352	0.119961	25.1208	2.94911e-139	2.94663e-137	328.658	1905.27	230.486	2528.93	255.579	2735.54	2896.93	232.345	2125.3	249.828	1636.81	342.487	276.373	2085.98	243.229	1754.53	280.371	1685.96	216.04	2112.81
191	Flnb	1935.34	3.69723	0.147595	25.0498	1.75589e-138	1.74523e-136	265.61	3341.02	227.192	4314.53	282.987	2644.26	4915.29	206.953	3238.08	375.203	3576.38	377.341	227.882	3448.14	225.012	2917.65	373.018	2905.67	201.039	4643.49
192	Gbp3	6009.62	7.43996	0.297093	25.0425	2.10817e-138	2.08445e-136	55.0948	13757	59.9849	13450.2	51.5874	10789.6	13214.4	37.7676	11367.2	49.4699	9753.96	36.2173	62.9684	12592.3	260.114	10822	39.0811	10669.4	50.238	13073.7
193	Erp29	2278.39	-2.00856	0.0802601	-25.0257	3.21201e-138	3.15942e-136	4349.41	922.025	3737.54	886.768	2744.56	921.444	945.021	3414.39	770.073	4059.98	856.063	3389.63	3944.37	980.653	3822.83	812.296	3504.41	969.984	3521.2	1015.17
194	Fas	262.874	3.01337	0.120909	24.9227	4.22758e-137	4.13693e-135	63.6217	372.074	66.723	489.531	47.5003	580.188	562.591	85.7878	395.092	51.5889	372.424	51.615	53.7015	494.401	52.7093	449.722	56.48	487.347	50.8664	473.512
195	Ikbke	3511.27	2.60724	0.105187	24.7867	1.24723e-135	1.21423e-133	1249.3	6312.75	834.833	5765.36	1047.64	7135.34	6532.21	906.404	5376.03	897.043	6266.92	1301.28	1117.5	6665.81	949.519	5029.63	747.939	4898.77	843.978	6347.2
196	Susd3	298.59	-3.90529	0.157857	-24.7394	4.03003e-135	3.90337e-133	714.313	34.514	432.523	32.4772	436.006	35.1029	54.9851	655.133	26.8492	571.551	70.0943	534.013	685.083	29.1075	550.707	40.1045	524.945	40.5092	462.897	40.8838
197	Parp12	1716.04	3.17337	0.128371	24.7203	6.46687e-135	6.23183e-133	351.642	2931.93	310.759	3339.18	262.797	3122.78	3334.28	285.436	3482.78	297.637	2569.73	273.315	339.444	2984.03	642.648	2996.43	361.021	2888.63	313.782	3232.64
198	Sde2	705.916	2.08074	0.0843412	24.6705	2.21556e-134	2.12426e-132	252.247	1036.75	227.104	1083.72	236.557	1066.09	1191.36	286.502	1283.08	229.459	1128.62	325.526	334.13	1312.11	257.792	1047.61	273.894	1062.36	277.455	1205.94
199	Atp1b3	9676.8	1.61554	0.0655088	24.6613	2.78111e-134	2.6531e-132	5036.13	14778.9	4352.63	16356	3961.58	12741.1	13544	4837.6	15321.2	4848.29	12650	4763.75	5253.14	16321.3	4912	15126.1	4968.05	13562.8	4699.1	15502.4
200	Slc3a2	4417.08	2.13574	0.0868576	24.5889	1.65872e-133	1.57446e-131	1645.12	6444.73	1672.7	7048.13	1509.06	5925.17	7753.68	1313.88	7943.66	1947.34	7330.34	1888.55	1780.19	7827.44	1317.84	6284.6	1542.68	7030.68	1759.85	8375.88
201	Skil	1432.59	2.62638	0.10726	24.4861	2.07572e-132	1.96047e-130	415.676	2963.32	344.321	2570.91	482.268	2260.37	3126.02	367.078	2338.06	295.135	2095.38	432.36	330.895	2588.96	506.552	2644.52	406.708	2159.61	409.521	1914.11
202	Rcbtb2	590.522	-2.43004	0.0994436	-24.4363	7.03197e-132	6.60866e-130	1188.08	129.223	1018.32	172.368	972.059	200.518	198.317	978.582	179.371	895.176	130.603	1020.73	1200.92	188.138	943.635	207.09	777.402	183.267	984.78	241.862
203	Sdc4	23669.3	3.92679	0.161151	24.3671	3.81912e-131	3.57153e-129	2159.76	46795	2729.23	56707.1	5355	48835.4	42024.6	2119.29	43304	2032.97	34740.5	4399.26	2557.75	50498.5	2349.17	40545.3	2846.34	34063.8	2648.03	46674.4
204	Herc6	2702.43	4.33662	0.178041	24.3574	4.8363e-131	4.5006e-129	222.927	4990.4	208.509	5563.82	213.111	5145.37	6243	212.171	4767.06	159.565	4595	210.03	217.431	5440.45	639.592	4782.83	228.325	4964.47	246.511	4998.05
205	Slc15a3	6959.56	3.69023	0.151525	24.3539	5.26989e-131	4.88017e-129	1128.96	12367.4	1011.33	13906.9	554.246	10066.4	12563.1	960.406	16728	1287.3	12125.5	551.145	1167.76	14853.8	1283.24	12672	1189.95	9478.99	883.17	14411.7
206	Fads1	676.801	-2.39428	0.0984931	-24.3091	1.57085e-130	1.44762e-128	1189.78	238.832	1061.22	150.047	1005.38	160.414	230.593	1038	196.993	1316.93	249.407	1330.53	1129.73	225.247	1142.85	231.091	1077.89	238.889	1056.33	265.863
207	Gpr126	325.398	4.14325	0.170585	24.2884	2.59655e-130	2.3813e-128	33.391	770.949	46.4025	514.051	17.7178	628.679	609.604	53.9639	680.788	16.9802	544.157	26.9655	24.3144	613.655	37.3179	629.591	47.7447	679.896	41.0651	490.735
208	Lrrc8c	873.896	3.63798	0.150072	24.2416	8.10821e-130	7.4003e-128	98.5151	1637.97	120.691	1939.9	134.499	1486.11	2329.59	128.089	1558.91	117.194	1131.15	145.592	102.79	1873.79	82.9879	1187.55	162.106	1421.96	207.652	1610.88
209	Slc25a37	765.528	2.16711	0.0895831	24.1911	2.76203e-129	2.50882e-127	261.315	1234.69	287.608	1021.37	238.951	1388.26	1348.36	272.953	1397.53	252.897	974.343	323.04	224.769	1316.84	315.197	1201.5	327.338	1307.85	281	1334.74
210	Lims1	3409.7	1.79351	0.0743602	24.1192	1.57293e-128	1.42193e-126	1418.2	5761.19	1472.45	5604.64	1325.38	4610.74	5575.6	1273.67	5169.12	1566.95	5044.06	1910.49	1456.97	5178.74	1645.49	4850.54	1710.72	5400.33	1474.93	5743.75
211	Slc44a1	516.518	1.89934	0.0787892	24.1066	2.1296e-128	1.91603e-126	210.669	720.314	224.613	937.701	201.04	694.384	890.641	245.566	914.825	193.922	822.347	217.534	194.944	805.181	231.026	729.602	240.068	736.917	219.645	899.425
212	Orai2	995.172	2.3404	0.0973483	24.0416	1.02299e-127	9.16062e-126	412.086	1887.71	304.326	1375.7	347.542	1305.68	1815.64	376.962	1807.86	360.942	1659.79	341.522	265.909	1809.81	243.431	1717.77	338.307	1620.25	279.283	1632.91
213	Ppap2a	1053.14	4.21889	0.1755	24.0392	1.08367e-127	9.65838e-126	94.3764	1910.96	79.2223	1664.84	61.6692	1258.34	1312.14	96.4799	2179.55	184.419	2745.14	98.221	100.406	2344.95	105.214	2277.44	159.358	2332.94	95.0973	1961.99
214	Sppl2a	5918.56	2.24336	0.0939116	23.888	4.08188e-126	3.62104e-124	2324.62	11298.8	1967.6	10900	1654.58	7419.87	10515.8	1998.82	9811.07	1792.98	9104.12	1819.38	2310.05	11224.2	2666.72	9313.08	2145.21	8609.87	1968.07	9526.34
215	Ehd1	11826.2	4.6206	0.193536	23.8746	5.61889e-126	4.96135e-124	765.137	23272.4	554.122	24451.6	1352.04	23046.7	22434.1	528.525	23461.7	1161.65	20310.3	1868.22	744.535	25516.1	561.073	20232.4	1033.08	16737.9	662.591	27828.8
216	Cdca7l	203.255	-4.69604	0.196933	-23.8458	1.1187e-125	9.8321e-124	359.068	13.7118	345.237	14.4712	337.538	23.535	20.5801	343.348	10.7068	403.201	8.96437	541.867	309.878	15.7899	397.706	13.1457	495.085	22.9858	381.861	6.41984
217	Cd14	41231.7	2.88898	0.121155	23.8453	1.13178e-125	9.90128e-124	8610.3	74047.4	6427.08	72130.3	9426.62	73087.1	64009	7476.95	79180.3	13887.1	66026.4	12670.4	9342.31	85406.1	10742.7	70480.1	11637.2	62101	7860.74	80084.4
218	Vasp	2061.82	3.19808	0.13466	23.7492	1.11881e-124	9.7429e-123	566.888	3952.76	372.812	4129.66	611.053	3614.25	3438.88	366.394	4052.58	370.459	3239.04	356.284	421.12	4739.88	342.739	3786.3	344.899	2333.6	297.96	3898.89
219	2021-03-05	1545.53	2.68324	0.112989	23.7477	1.15999e-124	1.00553e-122	366.475	2158.48	422.594	3629.39	413.22	2961.06	2769.76	370.573	2476.1	455.623	2096.69	345.93	364.867	2463.28	562.386	2491.79	469.229	2281.56	400.252	3411.43
220	Mtmr14	2841.04	2.29662	0.096739	23.7404	1.38078e-124	1.19149e-122	931.365	3729.83	1016.27	5606.69	837.207	4829.45	4628.75	1018.45	4517.87	858.977	3957.37	858.79	1198.3	5027.49	831.81	4113.37	1069.25	4522.85	994.666	6272.03
221	Fpr1	7655.31	5.5643	0.234525	23.7258	1.95406e-124	1.67855e-122	321.001	19303.9	113.276	11328.5	427.594	13542.9	16322.9	239.743	16434.2	259.51	14023.9	759.169	296.032	17838	383.26	17054.6	226.54	12318.7	136.679	11775.9
222	Sec24b	1771.87	1.8465	0.0778367	23.7228	2.0985e-124	1.7945e-122	741.107	2441.44	715.75	2970.22	774.347	2557.77	3007.5	683.894	2950.59	814.039	2349.73	700.148	858.802	2968.38	829.03	2617.03	814.922	2361.1	793.498	3488.02
223	Gmpr	222.283	-3.29844	0.13947	-23.6497	1.1877e-123	1.01109e-121	424.394	43.3776	342.251	39.752	386.993	69.4527	30.6776	361.275	29.6669	475.365	19.1254	432.5	422.636	36.2777	350.43	43.5884	397.753	42.5092	438.362	59.2653
224	Dusp16	718.651	2.77564	0.117444	23.6337	1.73542e-123	1.47077e-121	147.08	1473.88	178.725	1135.48	154.268	1260.03	1025.39	217.532	1286.28	234.81	1171.19	137.983	124.643	1418.45	185.181	1305.8	216.829	1125.92	238.408	1335.16
225	Gnpda1	2073.27	-3.22667	0.136639	-23.6146	2.72734e-123	2.30115e-121	4243.98	250.695	3805.12	289.26	3156.63	342.057	539.309	3847.9	367.617	3377.65	533.033	3125.75	5264.71	342.145	3609.78	393.426	3269.74	563.632	3765.38	377.597
226	Scd2	620.749	-4.22259	0.1789	-23.6031	3.58163e-123	3.00857e-121	1173.23	39.002	1105.22	56.4559	1238.97	79.308	60.6518	804.518	57.7431	923.016	67.6494	2085.41	1310.04	64.9243	1139.15	49.8891	1019.67	104.776	997.399	37.9623
227	Nod1	609.408	3.64747	0.154561	23.5989	3.95112e-123	3.30432e-121	137.822	1099.05	98.4332	1410.09	51.0213	992.79	1275.16	100.687	1081.55	71.4104	880.963	66.8347	112.367	1304.14	103.406	922.868	72.4503	849.535	93.6948	1463.88
228	H2-T22	2542.62	3.31996	0.140905	23.5618	9.5052e-123	7.91433e-121	471.43	4630.04	472.585	5294.75	294.36	4080.08	4267.55	447.122	4832.96	451.847	4183.62	329.13	509.924	5107.9	837.119	4238.02	374.486	3889.33	454.142	5686.09
229	Arhgap19	853.872	-5.39293	0.229303	-23.5187	2.6233e-122	2.17471e-120	2292.76	25.255	1969.37	44.6464	1169.41	48.9356	46.0164	1891.82	34.9405	957.761	54.7942	848.716	2564.92	35.936	1744.63	15.1464	1255.81	59.0471	1990.37	27.1637
230	H2afv	392.138	-3.09242	0.131526	-23.5119	3.08436e-122	2.54581e-120	687.775	81.3662	728.906	58.9707	579.926	99.6669	91.503	554.793	65.4947	862.085	84.4712	771.784	918.252	89.7797	550.005	87.4034	704.451	97.8104	662.768	65.5517
231	Lhfpl2	1578.33	-4.09006	0.173971	-23.51	3.22223e-122	2.64809e-120	3470.77	253.324	2887.99	90.3917	1884.23	106.171	102.548	3112.43	207.705	2828.53	163.133	2984.51	3663.61	169.061	2971.28	199.802	2879.76	192.447	3083.97	314.992
232	Eif4g2	12586.7	1.94967	0.083065	23.4716	7.94755e-122	6.50329e-120	4712.12	21296.9	5094.94	20024	6718.95	21406.8	19947.8	4814.87	19602.7	4871.64	18899.5	4332.72	4429.12	22823.8	5704.91	20518.5	6145.93	16982.1	4938.45	18468.9
233	Fabp3	1588.68	5.20318	0.221909	23.4473	1.40715e-121	1.14649e-119	130.525	3003.95	75.9161	3843.35	48.956	1062.8	5202.91	93.6206	3427.52	70.5702	2169.54	42.6281	106.086	3352.76	116.12	3250.28	66.19	2318.99	95.7468	3295.12
234	Itgal	997.013	5.13636	0.219077	23.4454	1.47282e-121	1.19487e-119	60.3906	3642.02	42.2225	1276.1	43.945	1545.52	1051.5	51.9978	2322.08	79.6675	2378.56	39.6149	46.4033	2631.4	56.2868	1901.72	95.2982	1364.81	33.9082	1276.81
235	Nampt	7154.26	3.08309	0.131673	23.4148	3.0235e-121	2.44247e-119	1719.81	14467	1588.53	13821.1	1030.07	9153.85	16325.7	1632	13250.5	1004.78	11013.9	1319.43	1619.04	12850.9	2292.44	12976	1286.87	12480.4	1618.28	11634.7
236	Tor3a	5775.89	3.01764	0.128945	23.4026	4.0229e-121	3.23605e-119	1367.08	8794.64	1003	12203.8	1224.66	11253.6	10497.4	1141.11	9880.28	1108.82	7365.28	1512.82	1403.91	11216.3	1871.87	8621.03	1076.22	8715.79	991.824	14268.4
237	Akna	1673.14	2.23638	0.0958236	23.3386	1.8011e-120	1.4427e-118	752.34	3239.17	535.477	2603.34	483.657	2647.71	2642.13	592.853	2955.41	735.454	2869.17	480.12	607.382	3070.84	573.307	2428.76	611.203	2243.73	487.828	2902.95
238	Tmem2	896.644	2.76436	0.118505	23.327	2.36086e-120	1.88313e-118	199.801	1431.24	209.873	1849.9	275.402	1625.79	1686.06	175.966	1465.22	262.656	1285.27	254.962	190.912	1806.05	209.118	1131.25	295.731	1342.3	220.128	2015.25
239	Pydc3	737.285	5.3994	0.231662	23.3072	3.7484e-120	2.97739e-118	26.0881	1310.34	21.0252	1684.54	52.7043	2415.57	1702.15	23.2088	1293.03	16.9447	1056.42	39.9502	35.4855	1480.38	83.2796	1287.05	24.704	808.309	22.0501	1362.47
240	Agtrap	1146.06	2.23103	0.0957797	23.2933	5.18124e-120	4.09836e-118	516.086	1817.08	368.878	1847.42	481.412	1588	2053.25	348.757	2203.11	421.427	1746.26	391.219	441.172	2250.13	351.048	1759.56	389.95	1594.21	321.625	2030.62
241	Lrrc8d	876.51	2.20521	0.0947053	23.285	6.28814e-120	4.95328e-118	320.063	1442.06	359.296	1301.78	285.469	1019.33	1633.53	326.867	1737.53	279.343	1575.49	350.451	322.529	1481.56	246.793	1497.13	283.176	1357.73	348.191	1361.87
242	Scamp5	468.864	-2.13184	0.0919066	-23.1957	5.03392e-119	3.94892e-117	838.924	173.77	847.286	151.532	845.381	174.919	177.351	681.549	140.783	692.272	230.774	623.814	721.893	183.238	792.227	184.307	809.594	183.574	761.296	162.789
243	Pim1	554.755	3.64773	0.15759	23.147	1.56008e-118	1.21879e-116	117.177	887.333	85.5715	1191.42	120.572	974.111	970.529	63.9386	1093.33	70.057	1161.56	65.9911	65.1191	1273.48	82.053	744.172	91.0643	635.602	55.917	1346.11
244	Map2k1	3442.65	1.71662	0.0743036	23.1028	4.34054e-118	3.37708e-116	1717	5358.46	1385.75	5647.85	1460.84	4885.12	5317.68	1471.65	5525.6	1639.38	4817.85	1951.17	1694.83	5949.55	1477.77	4599.38	1693.31	4653.22	1564.11	6042.38
245	Junb	3314.76	3.21265	0.139497	23.0302	2.32311e-117	1.80008e-115	872.135	5826.19	470.019	6656.03	638.688	5530.77	5933.43	547.737	7195.42	648.817	5204.56	959.948	728.774	7515.81	500.687	5093.41	600.572	3986.52	483.059	6902.54
246	Tsc22d1	405.399	3.14293	0.13656	23.015	3.30079e-117	2.54724e-115	73.2801	943.519	96.9854	713.016	47.627	447.234	595.704	97.9227	825.826	67.955	691.907	80.9033	85.8689	828.588	89.9342	779.798	97.268	753.725	87.0045	703.917
247	Sp110	2536.62	3.06454	0.133242	22.9999	4.67665e-117	3.59439e-115	528.497	4282.49	495.746	5888.41	461.21	4680.86	4677.37	470.172	4410.92	481.854	3436.62	447.171	614.798	4427.34	967.521	4168.1	465.723	3738.79	497.24	5591.65
248	Etnk1	1288.18	2.23691	0.0975182	22.9384	1.9229e-116	1.47195e-114	429.674	2079.03	410.993	2164.66	371.517	2288.35	2423.59	420.056	2138.09	349.991	1932.86	496.352	386.465	2123.59	641.638	1794.27	533.789	2144.47	470.676	2163.59
249	Ifi47	4643.64	5.67708	0.247915	22.8993	4.71957e-116	3.59824e-114	84.0951	8603.63	133.766	12528.8	217.156	8890.64	10961.8	96.7292	8864.91	125.701	5611.92	229.268	111.284	9256.19	517.372	8312.66	142.251	7265.67	125.241	10793.7
250	Rassf5	353.218	-2.83023	0.123725	-22.8751	8.22503e-116	6.24576e-114	611.387	73.2879	641.385	64.847	444.498	90.5484	74.7667	640.478	87.3467	651.289	97.6618	478.031	613.39	100.494	752.568	86.7335	695.581	114.682	675.402	69.9867
251	Coa5	4139.87	1.92567	0.084215	22.8661	1.01143e-115	7.64976e-114	1989.69	7603.68	1641.02	6492.71	1337.62	4919.74	7341.43	1763	6652.35	1575.73	6054.78	1638.46	1779	7537.25	1910.44	6357	1802.26	6040.13	1818.29	6542.85
252	Daglb	1323.07	-2.41275	0.105557	-22.8572	1.23898e-115	9.33366e-114	2983.54	402.524	2238.56	438.674	2232.48	357.427	363.386	2303.04	396.979	1699.28	402.314	2147.85	2868.41	446.968	1905.51	430.857	1885.12	421.204	2010.17	527.025
253	Ccdc8	123.026	3.72375	0.163004	22.8446	1.65547e-115	1.24219e-113	10.5324	355.516	18.6815	249.592	20.481	202.72	244.044	18.4914	247.672	21.7153	214.488	17.0532	11.5113	210.033	19.2717	154.918	19.3498	183.399	10.5345	230.51
254	Adm	314.731	5.9598	0.261427	22.7972	4.88853e-115	3.65369e-113	6.91789	1261.02	7.21832	389.941	13.7736	372.888	317.506	8.83814	705.444	9.51691	616.328	16.3461	12.6905	944.357	8.47104	639.573	5.13188	486.04	8.45815	464.166
255	Parp10	1648.16	3.11018	0.13656	22.7751	8.08739e-115	6.02083e-113	413.745	2562.8	280.81	3510.1	322.228	3444.7	3137.22	253.313	2747.56	306.168	2882.16	403.914	303.161	2760.96	577.978	2273.6	288.21	2533.48	276.265	3684.9
256	Tlr1	943.98	3.48134	0.152916	22.7663	9.88476e-115	7.33017e-113	186.31	2513.51	162.104	1608.87	250.009	1520.69	1811.23	105.89	2016.57	123.049	1445.33	191.106	141.747	1972	138.748	1700.66	104.818	1267.17	143.469	1476.3
257	Klhl6	351.111	-3.61018	0.158745	-22.7421	1.71887e-114	1.26969e-112	705.953	101.532	675.149	40.1345	415.069	54.9244	23.9366	614.303	63.8893	636.593	62.6676	556.76	834.402	64.1485	723.589	49.4906	635.277	49.9129	670.485	44.0041
258	Rnaset2a	2122.07	2.04879	0.0901731	22.7207	2.79918e-114	2.05967e-112	838.077	3918.08	809.878	3434.21	722.645	2828.99	3334.54	797.196	3767.79	897.792	3136.79	683.854	1116.02	3734.94	966.365	3484.78	719.8	3142.46	725.156	3382.09
259	Helz2	2224.86	5.11951	0.225382	22.7148	3.20267e-114	2.34747e-112	113.585	4377.74	64.7742	5712.43	132.049	4603.71	3897.73	116.637	3983.84	149.114	3714.89	141.075	76.2706	4404.05	317.527	3432.6	84.1505	3474.03	51.8853	5649.11
260	Mapkapk2	2020.63	3.04889	0.134385	22.6878	5.91791e-114	4.32098e-112	442.211	2622.26	394.188	3814.07	243.629	3317.77	3070.18	430.154	4920.33	609.252	3910.1	355.25	461.212	3456.19	503.171	2929.25	467.286	3813.3	460.719	4192.14
261	Rnf31	1156.85	2.56222	0.113384	22.5977	4.56957e-113	3.32371e-111	353.755	1916.87	287.687	2516	339.15	2002.14	2044.8	265.572	1904.96	347.015	1683.99	296.423	361.296	1968.83	481.549	1751.21	303.164	1439.64	324.841	2548.08
262	Slfn2	11670.4	2.85962	0.126549	22.5969	4.64995e-113	3.36926e-111	3110.98	19318	2576.02	25561.1	2459.52	18327.6	21452.6	2299.25	20743.6	2144.23	15632.8	2898.91	3222.68	22573.1	4645.84	18988.3	2291.59	18211.3	2625.99	24324.2
263	Zfp36	1590.43	4.21517	0.18713	22.5253	2.34616e-112	1.69352e-110	199.435	2396.05	160.296	4260.61	266.604	4150.83	3071.43	132.727	3294.46	125.886	1767.69	201.201	169.843	3899.49	138.746	2531.16	128.446	1628.65	99.1617	3185.97
264	Rasa3	608.785	-3.61984	0.160931	-22.4932	4.84279e-112	3.48241e-110	1301.8	105.853	1217.53	179.149	772.868	91.6823	85.2407	1102.57	64.9597	1085.86	68.9187	821.619	1394.21	81.2064	1308.4	76.3939	1054.26	69.7524	1184.98	108.433
265	Ogfr	2794.49	2.85067	0.126754	22.4898	5.22924e-112	3.74611e-110	682.641	4721.85	507.67	5935.75	598.351	5045.06	5256.84	566.85	4650.16	652.338	4071.07	725.598	673.533	5166.96	1175.71	4089.95	591.438	4107.1	639.956	6030.91
266	Scimp	368.772	4.92002	0.21883	22.4833	6.05328e-112	4.32013e-110	34.1161	818.106	7.16793	798.789	14.7494	490.188	799.631	24.1648	917.005	26.5983	512.837	33.8169	28.8935	942.955	30.1455	725.917	23.7366	371.538	12.6347	762.442
267	Tfec	1092.3	3.32576	0.148043	22.4647	9.18524e-112	6.53081e-110	217.558	1839	206.085	1890.89	142.538	974.896	2744.57	161.21	2154.5	200.467	1758.66	144.789	225.493	1918.31	257.623	2205.11	238.929	2374.18	194.506	1996.67
268	Adi1	516.095	-3.15136	0.14056	-22.4201	2.50756e-111	1.77625e-109	1014.19	68.3191	1001.53	81.0102	714.883	117.62	128.095	977.299	105.813	777.598	128.176	779.468	1185.59	62.2703	1087.25	143.292	761.377	99.9309	984.516	103.671
269	Socs1	169.27	5.30222	0.236514	22.4182	2.61407e-111	1.84482e-109	7.87229	130.458	6.02617	445.67	12.7217	379.513	357.519	6.34363	455.454	14.1979	330.03	7.64437	6.38504	310.432	12.065	354.303	9.02123	187.549	2.10984	350.078
270	Upp1	249.685	6.76885	0.301953	22.4169	2.69263e-111	1.89322e-109	3.46718	414.546	3.04525	416.757	13.6144	998.462	630.157	3.32727	600.74	4.02048	366.244	4.89502	5.31389	499.306	5.18142	439.432	2.31155	229.029	2.36825	351.484
271	Tdrd7	786.459	2.62364	0.117068	22.4113	3.05463e-111	2.13982e-109	210.053	1186.1	197.799	1500.78	178.952	1538.68	1281.31	157.61	1550.21	305.63	1158.65	186.19	190.595	1314.45	318.306	1240.43	224.718	1332.45	245.488	1410.75
272	Dennd1a	1342.03	2.30854	0.103196	22.3705	7.63495e-111	5.32875e-109	475.382	2760.87	512.346	2768.08	405.505	1771.02	2304.24	463.441	2107.64	418.699	1859.9	413.088	487.754	2429.95	352.882	2170.05	418.766	1726.53	557.118	2437.34
273	Parp14	5803.45	3.81035	0.17042	22.3586	9.96021e-111	6.92618e-109	850.873	10000.2	707.032	13512.3	748.114	10193.6	12634.1	462.705	11058.2	643.164	8874.93	754.777	786.466	10182	1652.01	10132.4	483.392	9214.09	646.333	12532.2
274	Tank	2624.03	1.90458	0.0852568	22.3393	1.53389e-110	1.06275e-108	1007.86	3950.63	954.116	4302.88	1088.18	4263.01	5201.74	976.765	3939.48	1070.93	3500.51	1154.53	923.791	3986.5	1387.46	4178.38	1298.43	4259.82	1207.97	3827.61
275	Arel1	1291.47	2.2681	0.101588	22.3264	2.04884e-110	1.41437e-108	543.914	1806.04	411.512	2749.28	452.539	2167.96	2797.57	463.253	2067.24	427.493	1754.14	397.161	445.282	2132.62	448.117	1743.2	457.629	1728.93	398.385	2437.07
276	Tmem86a	595.02	-4.77265	0.213774	-22.3257	2.08019e-110	1.43081e-108	1782.02	52.4013	1214.82	47.5327	668.55	23.702	54.5738	1314.28	28.7446	983.07	38.3652	597.99	1759.65	44.4961	1193.56	61.674	881.599	42.8417	1083.37	27.1637
277	Etf1	1395.03	1.59043	0.0713085	22.3035	3.41524e-110	2.34061e-108	636.346	2209.43	697.839	2250.73	678.99	1981.85	2174.7	600.172	2166.28	667.232	1842.19	775.057	603.324	2255.16	697.859	2217.62	844.62	1944.75	749.416	1906.99
278	Nceh1	3459.48	-2.22903	0.0999762	-22.2956	4.07265e-110	2.78112e-108	6386.9	803.071	6379.62	1426.44	5457.61	1279.51	1104.02	5347.11	1190.04	5049.01	1112.07	5870.32	5576.86	1235.87	5813.65	935.729	5432.47	1479.92	5729.98	1579.31
279	Sp140	1703.06	3.03493	0.136132	22.294	4.22589e-110	2.87542e-108	421.031	2487.89	316.513	3638.76	429.488	3984.83	3509.23	396.323	2499.69	272.746	2233.39	290.325	391.55	3092.45	566.89	2622.56	322.765	2721.91	305.553	3557.32
280	Icosl	377.685	4.5792	0.205528	22.2802	5.75554e-110	3.90226e-108	41.9893	734.859	24.1047	625.425	28.2096	522.106	796.316	13.1743	858.515	58.6807	754.74	21.6364	8.93942	885.506	42.2257	780.463	33.5082	542.22	34.8111	746.278
281	Ascc3	987.356	2.02138	0.0907979	22.2624	8.55283e-110	5.77819e-108	363.094	1675.41	340.486	1782.85	366.024	1823.66	1658.94	337.741	1500.08	388.512	1383.12	495.687	350.722	1709.96	499.452	1324.19	376.419	1525.31	384.246	1461.2
282	Sash3	580.457	-2.5687	0.115731	-22.1954	3.80597e-109	2.56215e-107	1106.99	269.696	939.478	117.359	760.478	194.258	125.56	1002.57	155.971	1031.03	182.235	914.46	1241.05	146.302	1006.39	169.896	946.277	162.307	949.56	187.264
283	Sgsh	381.694	-4.48342	0.202445	-22.1464	1.1301e-108	7.58087e-107	1039.87	16.6119	857.384	31.853	585.133	75.9198	36.9828	772.278	26.8717	660.793	10.8241	437.627	938.64	31.8965	609.5	24.8282	665.518	33.8516	746.58	30.9039
284	Tnfsf10	246.25	5.78429	0.26154	22.1163	2.20327e-108	1.47277e-106	10.7131	391.617	10.3827	610.95	21.719	689.975	624.866	4.54067	409.715	4.74386	338.091	4.55342	10.1008	429.215	11.6672	336.644	4.01305	309.502	9.95959	692.037
285	Mov10	1487.21	2.84576	0.129149	22.0347	1.33975e-107	8.92416e-106	430.84	2649.9	270.219	2696.12	282.644	2468.06	3086.05	341.137	2788.83	360.954	2345.67	286.872	394.157	2865.55	603.275	2348.68	336.319	1873.36	338.559	2977.1
286	Rhbdf2	2375.09	2.42043	0.109855	22.0329	1.39236e-107	9.24219e-106	955.658	3819.84	627.605	4255.06	563.568	3909.76	3768.56	724.158	4221.27	935.743	3892.72	640.291	848.718	4212.47	690.211	3373.91	846.203	3191.31	648.63	5376.08
287	Pgap2	1307.11	1.45898	0.0663446	21.991	3.51446e-107	2.32469e-105	682.894	2034.61	672.625	2108.89	667.753	2025.1	1856.22	637.79	1813.31	699.15	1660.54	793.772	747.774	2019.34	814.768	1871.16	602.506	1776.23	660.144	1997.64
288	Tra2a	602.709	2.24856	0.102253	21.9902	3.57191e-107	2.35449e-105	221.062	1109.42	241.638	1131.86	157.459	772.471	1184.29	200.883	1021.67	216.602	932.862	221.335	214.037	920.395	214.071	826.993	206.763	813.107	197.67	1249.59
289	Ndel1	1915.58	1.5836	0.0720798	21.9701	5.56232e-107	3.65381e-105	982.627	3407.43	870.052	2827.31	859.961	2202.48	3090.38	910.752	3055.18	983.138	2780.46	924.742	1032.25	3193.29	1008.39	2702.64	1028.93	2627.16	982.066	2842.33
290	Gm29094	162.879	4.77502	0.217549	21.9492	8.80859e-107	5.76629e-105	11.0142	382.846	16.9183	312.868	2.20156	265.459	383.675	14.4553	325.434	21.4501	202.78	6.81527	6.3082	314.427	8.58853	358.414	14.9245	278.093	13.7936	317.106
291	Cd300e	305.456	4.94124	0.225295	21.9323	1.27739e-106	8.3333e-105	13.0815	440.357	18.0781	527.34	19.3461	806.605	454.566	5.86979	548.997	27.5091	653.27	25.1955	5.10098	570.982	22.9566	551.287	37.3422	685.936	13.7304	681.567
292	Abracl	2022.68	2.98087	0.13606	21.9085	2.15695e-106	1.40232e-104	379.899	3861	413.219	4289.47	548.142	3897.96	3932.56	333.481	3550.9	329.298	2346.39	700.639	381.508	4032.72	470.2	3948.54	483.429	3222.71	502.39	2829.2
293	Cish	314.363	5.57593	0.254771	21.8861	3.52658e-106	2.28494e-104	38.3989	700.661	9.00638	469.489	10.3361	302.929	758.703	12.0374	833.198	10.3076	586.165	4.96789	19.5056	738.106	8.86316	744.733	14.5447	406.632	11.4906	607.179
294	Ifi35	2773.26	3.96125	0.181111	21.8719	4.81257e-106	3.10755e-104	245.104	4734.25	229.384	6154.98	296.628	5385.22	4703	221.914	5361.43	344.516	4154.53	451.151	336.292	5824.72	729.996	5040.51	255.204	4154.56	241.474	6600.35
295	Gpr85	500.899	3.33956	0.152736	21.8648	5.61777e-106	3.61518e-104	72.8091	1027.77	77.9146	751.052	120.243	522.497	1006.02	80.2634	1042.19	93.4997	1040.96	93.4091	75.8016	1188.92	117.587	1076.73	106.893	666.396	59.1586	797.877
296	Casp8	1480.28	1.59039	0.0727408	21.8639	5.73915e-106	3.68081e-104	674.492	1979.38	735.023	2241.02	621.773	2290.25	2565.47	678.333	2341.6	785.715	1984.69	758.01	652.712	2449.61	841.24	2035.8	829.675	2138.95	817.259	2184.48
297	Epsti1	1481.4	3.30989	0.151813	21.8024	2.20128e-105	1.40704e-103	246.758	2809.49	197.808	2925.62	245.889	3038.45	2689	236.346	2786.39	231.705	2065.56	261.443	250.488	2865.6	588.571	2654.89	231.59	2291.45	233.032	2777.86
298	Rnf19b	595.247	2.47801	0.113847	21.7661	4.86423e-105	3.09874e-103	237.517	1028.43	146.399	1028.08	182.72	1019.26	873.592	175.72	1201.56	240.24	1134.47	151.192	145.025	884.229	184.957	987.922	193.445	745.573	154.142	1190.46
299	Trex1	7907.4	4.50811	0.207569	21.7186	1.36834e-104	8.68779e-103	669.749	14410.1	500.647	19013.6	567.419	12298.5	15046.6	532.389	16687.8	421.447	12541.5	717.22	656.682	16026.5	1729.1	14428.6	402.197	10926	467.697	20104.2
300	Tapbpl	590.471	2.47184	0.113873	21.707	1.76358e-104	1.11599e-102	203.477	953.692	175.359	1121.56	170.851	863.593	1147.28	196.909	1032.39	158.256	704.469	157.816	229.69	1063.35	229.414	947.199	158.014	879.057	133.006	1284.04
301	Cdkn1a	14604.2	2.87794	0.1326	21.7039	1.88513e-104	1.18895e-102	2775.4	27668.7	2576.97	32240.9	4344.21	22223.8	21896.8	2278.19	25722.1	4618.2	19835.7	4593.21	3171.2	29236.1	3360.13	25985.3	3902.7	21668.2	3352.67	30633.9
302	Gphn	359.562	2.09066	0.0970554	21.5409	6.43849e-103	4.0473e-101	126.432	617.597	153.504	649.68	128.733	537.414	734.89	137.642	605.558	147.515	592.339	132.119	90.9889	516.834	153.247	584.826	140.835	528.426	154.63	458.038
303	Dync1i2	2402.23	1.34933	0.0627041	21.5189	1.03501e-102	6.48469e-101	1231.58	3351.55	1350.71	3811.37	1390.73	3740.96	3614.37	1290.24	3435.21	1243.52	2875.76	1573.4	1306.14	3755.78	1441.78	3331.92	1384.61	3101.61	1331.64	3481.72
304	Rgl2	443.463	-2.34608	0.109034	-21.517	1.07939e-102	6.74052e-101	1014.75	141.731	767.582	130.159	693.362	162.406	171.568	668.704	149.016	708.021	181.594	692.801	856.481	130.407	711.517	127.027	716.646	156.536	577.905	111.053
305	Fam177a	3142.3	2.31254	0.107487	21.5146	1.13536e-102	7.06676e-101	864.522	4573.81	1202.84	6735.89	1031.01	3895.8	6053.15	1083.14	6153.98	1131.94	5631.72	1180.99	928.135	4538.54	890.561	4738.1	1010.2	4058.85	1202.49	5940.29
306	Gpr18	145.867	4.63653	0.215761	21.4892	1.96378e-102	1.21832e-100	6.07292	363.535	16.2692	274.771	7.72914	352.68	220.984	9.82436	228.219	3.80886	282.382	18.5077	13.9935	313.842	4.84516	255.633	17.1431	227.187	6.3504	293.566
307	Elp5	1596.58	1.70707	0.0794433	21.4879	2.01875e-102	1.24833e-100	683.618	2434.09	763.799	2811.27	635.818	2069.34	2325.01	743.853	2468.48	855.085	2226.63	721.06	738.847	2572.79	884.051	2499.53	720.13	2051.04	746.441	2980.73
308	Ptprj	2390.9	1.88994	0.0881496	21.4402	5.64216e-102	3.47762e-100	1151.94	3428.42	1141.27	4388.54	840.915	3213.61	3447.04	1080.07	4196.76	832.338	3604.72	941.072	1071.33	3877.91	943.416	3026.01	1066.01	4382.24	1097.62	4086.8
309	Ppfia4	149.007	-4.72215	0.220391	-21.4262	7.61204e-102	4.6766e-100	318.723	9.91304	234.463	13.3867	220.288	20.3735	6.62891	295.773	9.91326	335.579	2.94489	314.717	334.188	8.58356	334.595	18.9488	262.58	9.78957	220.315	8.43585
310	Gm8995	4775.07	3.45787	0.161628	21.394	1.52012e-101	9.30904e-100	877.25	8599.16	688.204	10073.1	516.623	10600.5	10457.7	832.565	8135.38	636.6	6393.47	598.986	817.86	8894.63	1630.88	7359.17	735.165	7786.17	642.211	9225.71
311	Rmdn3	752.375	2.11849	0.0990312	21.3922	1.58088e-101	9.64999e-100	243.156	1334.59	284.198	1496.11	287.286	1255.47	1513.93	256.39	1121.66	268.698	906.325	320.611	302.112	1294.15	280.585	1059.43	283.516	918.464	287.255	1333.56
312	Anp32a	625.617	2.47192	0.115678	21.3689	2.60073e-101	1.58245e-99	210.157	1128.51	211.358	1325.32	235.023	912.035	1202.48	156.874	927.592	206.136	687.003	205.691	160.082	1030.94	187.075	1107.59	182.522	953.456	151.253	1331.24
313	Rapgef2	3732.62	4.43694	0.207643	21.3681	2.64589e-101	1.60478e-99	195.359	6287.26	194.815	9559.01	474.899	8965.45	6994.06	186.699	5949.44	468.773	6070.55	655.51	217.747	7792.36	260.851	5950.1	319.713	4998.8	317.178	8793.79
314	Cdc42ep3	148.658	-3.66212	0.171404	-21.3654	2.80422e-101	1.69539e-99	251.405	26.1379	227.786	11.884	236.074	17.2287	13.2871	250.739	15.1382	308.076	45.7397	297.523	327.884	27.981	301.921	19.8256	288.514	30.1498	245.997	29.8638
315	Dnajb6	2864.83	2.0071	0.0940712	21.336	5.26155e-101	3.17096e-99	1328.72	5192.8	1289.91	4622.69	988.105	3982.6	5096.8	995.085	4867.27	881.218	4152.06	1049.3	1330.57	5427.81	1348.62	4603.78	1171.85	3999.25	1040.29	3927.79
316	Stk40	359.901	3.17367	0.148774	21.3321	5.71467e-101	3.43314e-99	120.993	514.221	79.8581	665.432	61.4234	724.09	354.967	75.6867	789.512	60.0618	585.217	65.3759	63.2703	803.004	67.714	641.903	72.212	582.445	59.8345	810.805
317	Tnip1	2202.25	2.29617	0.107646	21.3307	5.89037e-101	3.52753e-99	939.212	3619.54	729.3	3585.89	571.963	3819.11	3892.56	813.844	3966.15	815.783	3289.65	475.065	892.089	4000.87	785.582	3282.08	755.517	2962.76	684.441	4163.5
318	Cerk	428.653	-3.43747	0.161221	-21.3215	7.1707e-101	4.28077e-99	943.604	63.8317	896.843	53.7908	471.94	73.1599	44.9131	898.755	93.6882	760.539	116.125	597.673	851.216	94.9395	754.304	53.0489	788.931	59.158	873.979	82.6159
319	Sh3bp5	1759.15	2.14536	0.10074	21.2961	1.23298e-100	7.33759e-99	868.321	2892.31	691.606	3311.79	498.166	2256.39	2762.38	600.623	2881.02	566.084	2810.26	573.11	778.793	3190.22	636.889	2409.62	622.403	2721.88	656.591	3454.49
320	Atp10a	196.028	5.02456	0.23626	21.2671	2.28901e-100	1.35796e-98	5.26884	385.695	11.4499	453.133	6.08962	271.512	334.322	6.80985	542.556	16.9883	398.404	10.1785	1.27932	427.735	21.6754	321.167	24.0831	327.914	12.6388	341.662
321	Usp12	392.277	2.05033	0.0964276	21.2629	2.50459e-100	1.48122e-98	150.21	562.905	142.519	714.787	143.716	650.462	673.772	131.345	633.242	182.938	581.834	137.541	142.413	688.651	162.358	472.529	186.942	578.312	149.909	759.15
322	Tor1aip1	2497.52	2.06791	0.0973209	21.2484	3.41342e-100	2.01243e-98	956.823	3454.45	933.782	5049.22	870.812	4543.46	4361.05	805.536	3692.24	940.951	2932.4	960.933	1041.31	4180.85	1261.62	3635.37	946.211	3770.86	914.135	4698.36
323	Aagab	522.8	-2.01751	0.0950483	-21.2261	5.47917e-100	3.21884e-98	995.719	173.36	755.696	193.138	657.112	163.946	218.93	849.35	195.713	828.71	225.561	824.112	941.543	182.039	903.181	242.189	800.741	213.444	825.765	265.742
324	Eif6	2605.26	2.01878	0.0951086	21.226	5.4936e-100	3.21884e-98	964.738	4440.11	865.422	4045.45	917.01	3365.07	3962.06	845.259	4615.3	1247.9	4055.09	1387.63	1037.3	4819.87	978.917	4001.17	1037.8	3727.51	1025.02	4766.59
325	Tnfrsf8	138.765	4.67862	0.220522	21.2161	6.77967e-100	3.96016e-98	1.83002	275.195	13.6869	264.066	9.28858	187.41	328.651	14.2622	306.41	14.0044	250.07	8.05994	10.0955	288.012	21.4179	284.753	4.48997	161.109	11.017	321.48
326	Hmha1	1478.21	-2.57858	0.121624	-21.2013	9.28493e-100	5.40691e-98	3629.89	342.067	2415	350.061	1835.97	422.556	374.183	2591.38	464.316	2439.5	498.621	2148.3	3456.61	514.081	2332.21	422.547	2225.7	384.997	2254.19	462.069
327	Sqstm1	62057.3	3.07954	0.145593	21.1517	2.66202e-99	1.54543e-97	14571.8	113435	13085.3	99728.4	9210.19	42163.1	115710	12992.7	129078	13501.5	130634	11947.7	15629.8	107827	14231.8	125623	13034.2	129919	13089.7	115734
328	Phf11b	3198.75	5.5167	0.261041	21.1335	3.91578e-99	2.26638e-97	82.8187	6254.55	95.195	7830.29	100.897	5963.08	6738.61	111.519	6200.03	83.1824	4909.17	110.241	93.8882	6926.08	502.819	6461.55	97.5551	4818.99	96.5287	6498.03
329	Cldn25	739.421	2.02769	0.0959859	21.1249	4.70055e-99	2.71232e-97	280.655	1221.16	314.485	1244.29	223.109	820.048	1239.99	269.7	1288.5	300.522	1401.38	314.826	271.028	1279.41	260.133	1106.88	317.918	1128.71	355.634	1150.05
330	Rsad2	30382	7.8481	0.373435	21.016	4.68288e-98	2.69393e-96	114.674	43305.5	179.588	91218	236.038	69429.7	79854.9	102.714	53776.4	133.769	39021.1	251.767	299.049	58542.5	1039.87	45357.5	101.55	50700	171.832	73803.9
331	Nek6	832.845	-2.39822	0.114182	-21.0034	6.10236e-98	3.49992e-96	1673.93	249.239	1258.97	194.84	1360.83	233.976	320.496	1324.55	252.308	1452.97	215.44	1789.94	1391.52	321.121	1011.99	330.998	1325.91	235.292	1413.82	298.758
332	Mthfr	1360.43	2.40997	0.114751	21.0017	6.33207e-98	3.62072e-96	516.117	2204.26	480.695	2480.18	451.967	2842.48	2376.62	382.786	2170.48	333.807	1861.25	415.187	523.229	2620.26	477.697	1938.48	353.947	1592.88	378.334	2807.87
333	Dnaja1	3335.35	1.91168	0.0911601	20.9705	1.2186e-97	6.94713e-96	1332.75	5357.33	1437.87	5457.6	1382.84	6051.23	5672.62	1159.61	5194.34	1215.14	4070.06	1789.45	1362.06	6269.22	1443.12	5599.24	1460.76	4133.56	1422.52	4895.66
334	Ms4a6c	3819.32	3.57274	0.17041	20.9655	1.35352e-97	7.69316e-96	783.27	8948.88	572.914	8671.53	558.631	7740.31	7110.99	486.409	7097.55	391.781	4261.88	591.591	748.666	7727.68	966.925	7294.49	333.401	4627.18	494.603	6977.71
335	Plagl2	1534.74	2.0102	0.0959206	20.957	1.621e-97	9.18596e-96	576.669	2111.32	647.981	3065.3	645.645	2266.64	2232.96	557.868	2752.89	607.105	2025.78	582.022	689.871	3076.44	632.966	2200.09	619.654	1914.98	552.123	2936.44
336	Psmd10	1391.41	1.51171	0.0721581	20.9499	1.87915e-97	1.06172e-95	800.112	2078.31	695.923	2020.54	581.823	1874.28	2279.4	791.251	2069.1	684.623	1911.82	741.581	814.101	2204.39	816.251	2295.5	665.554	1919.06	645.926	1938.73
337	Aftph	1689.98	2.88036	0.137568	20.9377	2.42798e-97	1.36774e-95	339.673	3631.62	353.995	3795.96	478.809	4401.57	2654.64	355.415	2346.59	300.465	2001.36	423.901	342.792	2663.81	497.837	2749.29	432.272	2541.28	515.921	2972.46
338	Hhex	313.846	-2.42289	0.115766	-20.9292	2.90288e-97	1.63042e-95	590.345	56.3583	587.678	101.69	467.102	100.676	91.7815	572.227	106.3	383.052	70.7609	511.631	562.799	138.138	585.569	102.294	553.553	101.143	507.763	86.0623
339	Pik3r5	7067.17	1.79474	0.085757	20.9282	2.96612e-97	1.66103e-95	3742.46	11513.7	3028.32	12479.2	3200.81	9903.3	9603.67	3034.28	10113.1	2860.89	11590	4028.63	3263.01	10646.7	2787.38	10118.6	2914.34	10121.3	2746.27	13647.5
340	2021-09-09	789.46	-1.9414	0.0928214	-20.9154	3.87806e-97	2.16532e-95	1233.71	283.101	1180.52	249.771	1306.16	284.245	374.146	1123.74	360.554	1527.12	457.84	1357.1	1216.93	329.49	1083.41	354.421	1288.16	308.615	1188.81	281.376
341	Phlda1	751.777	5.52821	0.264488	20.9015	5.18394e-97	2.88598e-95	23.0384	1403.84	14.795	1671.47	76.0112	858.832	1992.17	17.5652	1753.11	57.3665	1341.25	36.8284	13.241	1753.56	13.6974	1425.02	38.4954	858.333	23.5989	1663.31
342	Cyfip1	7027.43	1.31252	0.0628403	20.8865	7.09737e-97	3.93966e-95	3906.02	11912.3	3790.12	9672.9	3915.3	10874.4	9737.57	3636.68	9291.57	4255.35	9568.23	4696.33	3983.06	10843.2	3729.93	9241.1	4172.14	9058.03	4234.64	10029.8
343	Mmp3	135.423	6.9255	0.331915	20.8653	1.10771e-96	6.13084e-95	0	431.961	0.60197	264.128	2.20769	124.893	184.166	4.40505	338.782	7.59219	237.76	1.4452	0	269.232	2.41638	206.795	1.2856	255.84	3.1679	371.779
344	Rap2c	980.817	2.31897	0.111144	20.8645	1.12581e-96	6.2129e-95	363.649	1728.04	358.561	1961.02	356.35	1923.02	1697.02	338.161	1628.61	202.291	1246.57	345.619	272.228	1847.83	358.018	1591.45	326.646	1510.92	353.141	1207.2
345	Ubr4	2999.92	1.99921	0.0959766	20.8302	2.30453e-96	1.26809e-94	1184.57	4730.75	1247.54	5916.75	834.776	4574.07	3902.84	1352.21	5629.45	1278.03	4728.9	1291.89	1310.36	4037.09	1015.93	4301.11	1169.99	4955.84	1319.77	5216.46
346	Pnpt1	1078.38	2.37665	0.114308	20.7917	5.14254e-96	2.82156e-94	288.411	1772.42	285.273	2145.83	316.605	2152.32	2083.12	315.59	1489.3	329.186	1347.67	429.782	284.324	1924.89	452.992	1526.87	429.934	1792.06	348.64	1852.37
347	Prpf38a	516.631	2.20625	0.106152	20.7839	6.05719e-96	3.31382e-94	168.936	803.398	186.588	1007.15	168.81	860.609	1039.86	158.245	787.388	179.047	606.462	204.926	173.554	915.06	250.302	763.371	193.755	708.94	159.814	996.409
348	Notch2	3148.75	2.14162	0.103088	20.7748	7.32122e-96	3.99385e-94	1475.36	5577.04	1354.72	5755.7	961.438	4418.77	5630.72	1187.99	5060.29	917.07	4139	830.407	1395.65	5357.07	1245.2	5480.15	1166.05	4750.09	1111.37	5160.89
349	Nostrin	200.712	-2.76181	0.132945	-20.7741	7.42375e-96	4.03818e-94	299.741	16.8054	366.928	52.8686	323.589	31.6531	72.357	309.167	39.2365	362.786	69.3114	355.693	352.04	61.1458	409.271	60.3408	356.125	63.696	367.069	44.4232
350	Gdpd5	223.671	-3.65479	0.176048	-20.7602	9.91763e-96	5.37932e-94	452.806	21.6815	388.695	22.2849	386.355	37.5731	57.6793	333.871	27.9082	544.849	48.9406	488.908	470.641	29.2764	291.512	16.6376	380.525	31.0542	396.128	46.1039
351	Arhgap18	415.442	-3.74972	0.180734	-20.7472	1.29957e-95	7.02881e-94	763.074	131.566	826.512	46.9504	747.18	62.1905	52.4923	706.257	52.0142	667.264	38.4851	876.244	939.141	29.1864	684.891	110.045	706.57	36.1848	751.659	80.9232
352	A530054K11Rik	1263.53	3.1109	0.150294	20.6988	3.55019e-95	1.91468e-93	277.066	2674.35	296.494	2586.64	256.41	1222.54	2773.72	338.097	2734.43	137.629	2265.22	237.327	258.618	2072.98	279.147	2201.1	277.081	2569.16	262.079	1550.51
353	Rac2	13599.2	1.73684	0.0839631	20.6858	4.65115e-95	2.50134e-93	6095.7	23476.7	5422.38	20679.4	5905.47	17614.9	18935.3	5953.75	22113.3	7703.56	20795.2	5353.31	6532.75	23520.3	7435.51	21446.2	6743.2	17407.8	5627.43	23221.3
354	Igsf6	5012.22	2.52624	0.122623	20.6017	2.64844e-94	1.42028e-92	1855.87	8999.46	1597.51	8716.81	923.189	6599.33	9869.27	1796.91	8497.47	1147.38	7879.69	1336.75	2121.22	8973.63	1390.36	7966.04	1250.06	9301.53	1415.01	8607
355	Trim26	1277.15	1.77414	0.0861736	20.588	3.51774e-94	1.88115e-92	626.797	2315.08	530.702	2257.42	502.389	1874.24	1992.85	639.093	1847.62	531.751	1635.94	529.335	619.389	1988.52	640.398	1839.11	632.415	1602.35	521.712	2415.88
356	Fam49a	2269.21	2.47153	0.120371	20.5327	1.0999e-93	5.86531e-92	752.059	3772.44	735.487	5731.9	592.494	3812.02	3962.22	764.501	3009.74	651.862	2833.37	614.144	655.529	3346.35	754.923	3070.26	810.578	3741.68	599.049	5173.51
357	Psmb8	3898.95	2.76293	0.134712	20.5099	1.75709e-93	9.3436e-92	953.523	6874.7	762.532	7605.66	869.9	6351.1	6584.73	828.603	7351.03	1015.67	5563.46	1061.03	1156.53	8031.8	1709.65	6445.36	852.922	4752.5	811.726	8396.48
358	Rnf114	3602.37	2.2881	0.11178	20.4696	4.01796e-93	2.13064e-91	1205.52	5910.56	1111.59	6759.5	993.584	5528.06	6151.84	1082	5869.83	1247.09	5386.83	1159.87	1335.21	6213.29	2051.1	5512.41	1054.87	5473.29	1015.74	6985.23
359	Cd86	757.955	3.13903	0.153484	20.4518	5.79346e-93	3.06359e-91	215.481	1372.09	129.479	1714.8	106.128	1508.33	1469.21	145.016	1397.64	152.993	985.903	93.9985	210.671	1669.24	143.54	1000.5	178.352	969.864	178.885	1516.96
360	Agrn	513.527	4.30329	0.210446	20.4484	6.21173e-93	3.27565e-91	23.9856	984.126	38.339	945.084	34.0134	572.802	744.102	60.3713	1364.38	50.1207	1469.39	41.0619	35.0221	919.818	114.985	765.305	58.781	937.72	45.5677	1065.57
361	Hcls1	5247.96	1.82254	0.0891835	20.4358	8.03325e-93	4.22447e-91	2000.01	9476.29	2114.1	6928.98	2252.57	6589.67	8127.89	1788.91	8898.41	2838.51	8885.29	2689.49	2132.12	8462.35	2375.66	8275.01	2668.91	7890.46	2263.42	8301.11
362	Cnr2	194.216	-4.86976	0.239194	-20.3591	3.85698e-92	2.02268e-90	450.109	4.40782	394.822	4.52608	198.202	29.9023	6.00547	413.095	12.9936	380.832	30.6632	285.759	481.75	12.9243	356.993	12.681	383.196	6.9017	407.537	11.0188
363	Ccl22	513.965	7.54052	0.370422	20.3566	4.06147e-92	2.12405e-90	0.7153	1509.18	5.92691	991.077	21.1765	553.655	702.975	4.2029	1172.14	16.761	1029.38	7.02767	4.18225	1417.67	0	1147.91	4.22243	558.056	2.59628	1130.45
364	Samd9l	3007.83	2.94026	0.144562	20.3391	5.80092e-92	3.0254e-90	547.046	5573.39	674.944	5814.95	673.724	6173.93	6465.88	636.755	5070.28	425.673	4292.9	808.9	660.112	5491.76	1294.54	4907.1	573.683	4828.62	643.542	4598.95
365	Ppp1r15b	1724.9	1.68386	0.0829219	20.3065	1.12557e-91	5.85421e-90	904.51	2502.38	825.679	3112.69	682.804	2811.77	2933.43	745.581	2385.02	852.535	2125.63	805.782	862.221	2837.48	847.038	2375.99	929.586	2233.89	738.673	2985.29
366	Gm6377	1551.08	4.79749	0.236845	20.2558	3.15757e-91	1.63779e-89	80.8537	3736.84	91.4688	4137.32	173.832	3077.95	3203.33	74.0657	2664.5	31.3119	1988.35	174.246	43.4884	3710.6	174.91	2508.39	119.542	2109.57	108.8	2812.25
367	Cxcl3	2674.29	8.88675	0.438779	20.2534	3.31841e-91	1.71653e-89	18.0257	6503.07	16.2655	2834.27	3.85475	1320.4	10324.1	8.42258	7248.36	1.91922	6001.81	2.49091	30.3773	6165.48	15.8266	7148.27	11.9625	3294.24	6.37705	2530.28
368	Cmpk2	20222.1	7.17941	0.354581	20.2476	3.72874e-91	1.92355e-89	138.353	31128	149.45	54324	272.201	49199	48281.4	133.098	34076.1	132.407	28971.7	281.128	275.973	39604.5	1076.83	29526.6	125.477	34261.1	190.856	52293.9
369	M6pr	5855.44	1.27552	0.0630773	20.2215	6.33013e-91	3.25667e-89	3326.63	8695.4	3209.44	8142.69	2955.38	7192.6	8866.38	3007.94	8024.63	3513.32	8067.35	4096.37	3659.13	8616.92	3224.59	8323.16	3709	8460.47	3523.43	8493.94
370	Napepld	350.893	2.61115	0.129247	20.2028	9.25623e-91	4.7492e-89	86.615	732.853	74.5283	556.637	111.681	581.077	380.7	80.4596	528.88	105.722	695.744	104.607	120.013	605.756	84.0987	558.982	119.015	825.174	96.9735	568.338
371	Ubb	24475.8	1.26756	0.062803	20.1832	1.37566e-90	7.03924e-89	14910.3	34724.4	13677.3	35724.8	12912.9	29912.6	34385.8	13311.3	35498.6	15451.2	30585	13474	16547.4	37169.5	16138.7	37371.6	13547.4	33233.2	13710.4	37230
372	Rrs1	653.136	2.46651	0.122278	20.1714	1.74655e-90	8.91306e-89	167.403	1203.61	154.266	1027.93	182.949	840.504	968.086	145.795	1334.92	222.01	1116.17	261.819	204.016	1294.52	245.302	1131.99	254.081	1135.56	161.613	1010.18
373	Tmbim4	2315.17	1.68059	0.0833335	20.167	1.90714e-90	9.70646e-89	1209.89	3863.61	1100.21	4109.12	1105.67	2777.11	3398.63	1114.05	3621.2	998.872	3228.14	981.045	1208.9	3690.18	1292.13	3702.85	1067.28	2895.48	932.911	4006.19
374	Zc3h12a	536.583	3.60478	0.178869	20.1532	2.52462e-90	1.28148e-88	89.2645	1157.44	86.7489	1174.56	155.195	848.317	1032.14	84.3349	1084.47	70.391	786.283	52.2358	95.622	1145.07	50.6348	910.518	78.5306	587.218	51.7757	1190.91
375	Fli1	676.794	-1.62964	0.0808737	-20.1504	2.6688e-90	1.35105e-88	1170.02	328.01	1073.82	326.437	1119.54	371.547	291.293	1002.41	318.938	892.933	364.839	893.36	1000.5	309.39	1140.38	373.651	985.964	276.114	933.125	363.603
376	Acsl5	3714.31	1.63435	0.081301	20.1024	7.02592e-90	3.54734e-88	1558.73	6580.53	1480.05	5691.53	1649.33	5068.75	5778.97	1617.82	5471.77	2196.11	4996.77	2134.49	1630.31	5885.47	1900.03	5471.1	2066.64	5471.33	1856.63	5779.75
377	Plxnb2	3324.83	-2.12987	0.106016	-20.09	9.02046e-90	4.54229e-88	6693.21	995.641	5218.39	1047.47	3718.67	1253.27	1102.43	5750.26	1365.82	6145.22	1560.1	4955.54	6640.59	1460.91	5159.41	1183.31	4897.64	1162.76	4948.7	1237.37
378	Tlcd2	274.997	2.475	0.123429	20.052	1.93962e-89	9.74119e-88	96.9308	574.372	92.5524	612.393	60.5875	349.012	418.61	62.6333	417.028	97.0504	421.592	95.7465	79.7964	463.217	70.245	437.227	99.6731	488.435	78.7931	484.037
379	Ctsc	9264.19	1.9376	0.0967337	20.0302	3.00239e-89	1.50389e-87	4125.56	18485.8	3206.68	13353.5	3522.95	13374.8	15004.3	3305.35	15595.3	4100.18	12216.2	3818.28	4050.69	18692.5	4701.62	15748.4	3917.17	11730.3	3613.62	12720.6
380	Batf2	294.389	5.98095	0.298755	20.0196	3.71638e-89	1.85662e-87	4.58619	489.09	0	792.951	8.00752	603.116	529.89	11.4117	622.293	9.49535	383.315	9.73598	15.7043	660.256	26.4895	594.755	4.65563	314.736	6.41945	800.881
381	Tox4	1612.8	1.34591	0.0672434	20.0155	4.03732e-89	2.01166e-87	950.718	2535.8	962.86	2576.78	794.361	2391.04	2178.16	865.626	1962.34	816.339	2251.42	985.718	977.343	2429.95	960.906	2330.31	844.684	2016.97	938.141	2486.59
382	Cmtr1	1408.6	2.15383	0.107613	20.0147	4.1043e-89	2.03969e-87	605.022	2326.03	458.11	2711.01	484.017	2493.26	2410.43	450.691	2108.32	510.009	1897.38	574.684	448.19	2613.5	701.131	1754.2	385.622	2126.61	556.021	2557.77
383	Pml	1237.5	2.76703	0.13844	19.9871	7.12863e-89	3.53342e-87	295.062	1953.53	311.479	2982.02	358.02	2406.9	2235.08	293.488	2135.17	421.478	1549.5	270.201	213.753	2429.61	460.141	1751.3	264.727	1626.67	290.312	2501.55
384	Cd300lb	1057.2	-3.20499	0.160806	-19.9307	2.20302e-88	1.08912e-86	1982.15	107.059	2015.67	323.825	1464.85	134.266	214.053	1985.58	218.224	2071.98	145.874	1864.58	2040.1	140.671	1988.11	170.777	1966.4	316.272	1712.76	280.73
385	Trim25	2754.87	2.19143	0.110078	19.9081	3.46363e-88	1.70788e-86	1151.35	4473.57	891.563	5400.69	865.442	4966.31	5232.82	992.304	4013.97	839.259	3173.98	1148.13	1039.31	4734.52	1082.62	4273.58	926.889	3148.44	958.494	5784.24
386	Slc2a1	2799.62	2.78464	0.140022	19.8872	5.252e-88	2.58301e-86	630.973	6052.55	498.712	4287.55	541.363	3556.21	4154.22	567.488	5761.99	851.043	4884.34	1077.96	659.87	6072.66	586.339	4521.88	915.195	4334.49	759.233	5278.42
387	Tpst1	472.06	2.89564	0.145669	19.8782	6.28992e-88	3.08548e-86	69.1494	734.202	99.1179	945.02	176.331	869.427	690.424	87.3685	767.198	114.034	681.695	101.141	75.4057	983.566	158.248	809.132	125.938	794.09	110.333	1049.38
388	Slfn8	2804.96	4.03336	0.20321	19.8482	1.14159e-87	5.58554e-86	346.689	5792.25	222.015	6425.71	278.134	5665.54	5059.27	249.971	4634.17	172.22	4093.44	337.367	330.605	5724.1	823.299	4322.21	214.635	4755.01	260.408	6392.16
389	Hdc	645.122	6.77547	0.341737	19.8265	1.75716e-87	8.5753e-86	5.70075	1046.69	6.5559	1230.34	35.3693	1979.58	1680.31	23.1289	959.77	3.94494	1085.45	5.5019	7.12313	1398.43	5.51377	1044.53	8.99755	1070.25	16.467	1288.8
390	Lyrm1	131.835	2.15655	0.108944	19.7951	3.27811e-87	1.59568e-85	54.373	187.92	46.5259	217.21	45.5597	215.689	233.217	53.3321	200.521	35.7319	201.703	47.8736	73.0049	232.039	37.2345	247.907	45.8742	188.339	49.068	223.586
391	Dst	2052.62	1.93952	0.0979884	19.7933	3.39731e-87	1.64948e-85	865.477	2689.7	752.212	3407.98	685.014	3275.62	2884.14	814.974	3899.11	1163.4	3991.22	843.862	790.696	3263.99	765.179	2720.47	989.052	3256.52	818.112	3175.65
392	Clec4d	17357.6	1.79631	0.0909951	19.7407	9.64731e-87	4.67206e-85	8783.67	30784.9	7606.38	29029.7	5922.29	19023.9	28193.2	8526	29093.2	7965.73	22710.9	6842.07	7886.08	28869.6	8859.94	29771.8	7789.24	25936.8	7431.6	26124.6
393	Actr3	13924.6	1.19978	0.0609236	19.6932	2.46531e-86	1.19087e-84	8263.05	19675.1	8407.15	21588.9	8007.07	19420.7	21070.2	7567.39	18984.2	7194.39	17708.4	9414.28	8454.35	20693.4	9395	17612.5	8904.69	17948.7	8861.3	19321.3
394	Pim3	411.935	2.63123	0.133849	19.6581	4.92706e-86	2.37399e-84	141.519	770.572	94.0074	631.348	88.4732	570.862	829.911	116.258	918.594	126.954	696.315	117.561	135.282	859.879	106.238	602.824	82.0204	477.388	142.488	730.198
395	Acp6	136.299	-2.68294	0.13702	-19.5807	2.26107e-85	1.08669e-83	251.655	37.1552	223.146	29.1966	192.825	45.4198	23.9682	236.049	29.7685	221.384	58.3374	210	273.555	38.098	256.692	32.0872	232.964	52.7844	246.77	34.1321
396	Myo1f	5751.79	-1.8764	0.095879	-19.5705	2.7591e-85	1.32269e-83	11637.4	2264.32	8793.61	2256.08	6318.41	2263.09	2696.2	9613.12	2436.14	9172.22	2672.5	7439.72	11476.1	2737.13	8550	2290.01	8564.89	2439.88	8846.88	2568.08
397	Dnmt1	817.569	-2.88725	0.147593	-19.5623	3.24357e-85	1.55103e-83	1077.28	226.933	1176.64	166.341	1385.18	170.158	179.684	1085.83	205.079	2101.89	232.032	1855.77	1067.87	168.571	1201.79	149.373	1951.82	223.731	1483.33	242.067
398	A630001G21Rik	561.31	1.94612	0.0996378	19.5319	5.87639e-85	2.80295e-83	174.013	867.549	242.959	1027.01	211.504	912.852	794.94	304.742	936.164	198.093	741.279	204.564	205.186	968.638	260.463	870.092	272.779	794.118	239.517	999.739
399	Tbc1d1	795.756	1.90408	0.0978469	19.4598	2.4055e-84	1.14451e-82	309.661	1504.87	334.614	1513.53	297.604	1351.86	1234.49	301.634	1276.36	364.149	964.765	344.368	285.07	1264.89	324.703	963.727	428.708	1144.72	358.446	1346.95
400	Surf4	6630.42	1.44737	0.0743978	19.4545	2.66815e-84	1.2663e-82	3654.18	10603	3444.45	9745.28	2843.2	7355.78	10104.9	3342.47	10524.4	3946.48	9640.55	3337.99	3829.6	10756.9	3861.54	9441.76	3790.3	8948.68	3534	9903.05
401	Tmem206	1025.08	-1.55364	0.0800083	-19.4184	5.39199e-84	2.55266e-82	1492.58	453.095	1586.06	537.749	1394.85	423.996	456.175	1417.54	546.154	1611.59	537.561	1535.51	1641.9	606.67	1340.59	447.668	1597.52	546.607	1673.48	654.301
402	Trim30c	957.651	7.66791	0.394896	19.4175	5.48546e-84	2.59045e-82	4.34838	2106.64	12.6542	2125.54	9.94308	1852.29	2608.32	1.96101	1950.48	7.60419	1472.92	7.54154	15.2831	2225.72	35.0863	1743.7	2.14439	1163.05	1.05737	1806.74
403	Zfp811	201.623	9.62685	0.496012	19.4085	6.53836e-84	3.08001e-82	0.867563	532.511	0	385.476	0	347.003	403.177	0	287.425	2.84756	492.046	0	0	336.194	3.62397	301.858	0.856033	425.965	0	512.61
404	Bfar	891.433	1.51276	0.0780589	19.3798	1.14325e-83	5.37216e-82	451.945	1099.04	532.904	1475.22	448.686	1335.79	1421.65	472.515	1350.42	448.401	1309.55	381.294	462.506	1382.69	557.103	1161.68	450.216	1167.79	433.393	1485.86
405	Crot	414.123	-2.15904	0.111769	-19.317	3.86129e-83	1.80995e-81	729.126	184.329	718.895	122.405	651.668	194.961	187.854	716.885	141.104	584.404	201.789	541.089	788.543	118.029	640.675	135.456	688.952	150.277	681	105.027
406	Lcn2	1510.84	7.49229	0.38819	19.3006	5.31101e-83	2.48336e-81	28.1033	2352.56	16.1828	1661.79	14.1161	5098.63	4223.69	24.8717	2900.77	3.83238	3823.66	3.14784	49.0711	2338.87	8.49416	3290.32	15.4188	2364.1	5.80264	1993.39
407	Slc25a12	1222.19	1.63853	0.0849319	19.2922	6.24053e-83	2.91082e-81	568.947	1787.32	510.364	2043.01	560.264	1692.94	1838.96	481.497	1691.86	788.579	1810.65	675.123	537.074	1891.7	608.062	1708.53	647.604	1899.02	561.622	2140.76
408	Tmbim6	12164.6	1.47724	0.0765742	19.2915	6.32572e-83	2.94332e-81	7353.01	18630.8	6195.03	19400.3	5353.59	16263.5	18305.1	6125.28	18432.1	6545.8	14842.8	6220.56	7644.12	20639.9	6731.02	17205.1	6216.41	15353.3	5917.84	19917.2
409	Apobec1	2469.39	-2.24957	0.116689	-19.2784	8.16154e-83	3.78823e-81	5146.47	610.43	3989.47	917.288	4056.1	844.641	941.12	4735.12	769.646	3141.5	680.193	2969.93	4700.73	1048.87	4775.35	916.876	3408.28	806.69	3901.78	1027.31
410	Arl4c	148.389	-4.09091	0.212246	-19.2744	8.81282e-83	4.08055e-81	308.255	18.8292	328.265	11.4153	225.898	23.1984	38.4617	286.794	16.8893	262.471	7.24412	176.1	342.597	18.9648	338.34	9.99226	267.631	10.9811	270.253	5.21035
411	Gsap	1096.59	1.98298	0.102991	19.2539	1.30894e-82	6.04596e-81	617.976	2274.43	351.933	1672.82	361.911	1883.08	1819.92	395.549	1614.12	416.766	1981.6	425.67	457.619	1511.94	473.663	1571.32	470.244	1758.29	454.277	1418.7
412	Lta4h	431.374	-1.43844	0.074765	-19.2395	1.73024e-82	7.97253e-81	696.557	244.236	607.421	203.507	550.489	264.235	212.498	586.172	227.541	643.314	198.826	596.755	697.442	250.506	601.811	227.669	679.815	253.98	653.876	230.826
413	Pgs1	801.175	1.9443	0.101255	19.2019	3.56543e-82	1.63889e-80	248.096	1206.25	274.067	1465.57	363.472	1132.49	1143.06	296.106	1327.58	424.368	1336.51	306.366	332.431	1358.63	334.945	1215.64	429.225	1094.05	293.729	1440.92
414	Gnl1	536.518	2.03648	0.10632	19.1543	8.90382e-82	4.08285e-80	196.999	885.938	194.473	961.884	132.505	798.457	822.692	204.794	835.533	241.218	697.586	217.37	271.43	961.006	217.271	748.194	218.363	831.615	215.201	1077.82
415	Rrp7a	2107.14	1.65919	0.0867337	19.1298	1.42735e-81	6.52933e-80	1074.78	3430.84	893.961	3215	826.564	2810.91	3680.56	924.33	3391.13	1158.9	2656.68	1148.1	1153.37	3602.3	1049.71	2831.04	1015.76	2799.01	889.911	3590.02
416	5430435G22Rik	2013.64	-2.37817	0.124345	-19.1256	1.54729e-81	7.06099e-80	3287.23	366.208	3532.31	608.837	2856.19	625.254	682.513	3054.7	614.782	3200.15	841.595	3280.75	3820.67	532.303	3687.74	598.851	3384.77	1027.91	3679.42	590.632
417	Phf11a	1076.59	6.0125	0.314375	19.1252	1.55699e-81	7.08821e-80	20.7765	1812.34	18.0762	2541.09	26.4865	2280.92	2381.9	16.7306	2152.76	21.9355	1749.78	19.8438	31.771	2146.58	132.167	2103.55	23.1286	1800.56	24.3641	2227.13
418	Ccnl1	1052.71	1.34975	0.0705891	19.1212	1.68125e-81	7.6356e-80	619.149	1467.14	619.407	1703.76	492.389	1605.1	1497.63	699.315	1511.41	522.554	1280.56	617.692	610.829	1493.97	555.944	1501.11	556.444	1412.92	643.665	1643.16
419	Prkx	2728.7	1.88943	0.0988976	19.1049	2.29861e-81	1.04145e-79	1301.19	4734.81	1260.48	5410.23	989.933	3797.47	5065.97	1136.44	4162.48	1082.33	3574.66	859.469	1062.04	4421.44	1293.81	4022.87	1368.05	3473.62	1250.1	4306.65
420	Ifrd1	1872.73	2.88588	0.151083	19.1013	2.46505e-81	1.1142e-79	309.753	3003.53	348.175	3048.97	611.599	3045.68	4116.46	273.934	3438.3	389.87	2894.4	654.926	298.064	3749.82	552.019	3304.42	558.493	3602.31	460.556	2793.24
421	Tmem67	299.466	2.47078	0.129417	19.0917	2.9625e-81	1.33587e-79	98.7834	414.326	102.295	673.863	81.7032	555.065	669.851	107.678	458.964	63.5853	368.396	77.0365	98.4043	455.556	92.2773	432.063	85.2296	449.736	114.005	590.499
422	H3f3b	11833.1	1.66791	0.0875459	19.0518	6.34208e-81	2.85304e-79	5755.62	18565.4	6229.24	22792.3	6101.3	18978.4	17022.7	4822.39	17351.5	4553.41	13263.5	5684.3	5074.52	19237.2	5862.52	17507.8	6227.62	16512.1	6340.55	18779.2
423	Coq10b	549.999	2.12136	0.11144	19.0359	8.6058e-81	3.86223e-79	192.798	1006.92	146.61	837.912	238.798	841.85	1002.87	167.84	941.552	199.053	633.76	259.797	167.593	996.431	235.415	905.641	237.363	985.396	208.487	793.895
424	Trim21	117.702	3.37694	0.177456	19.0297	9.68488e-81	4.33627e-79	15.6964	234.096	18.6235	226.591	20.9538	349.158	228.285	20.9176	204.205	13.8291	173.951	29.7788	20.3693	238.448	25.258	179.719	15.8456	150.143	23.1506	165.029
425	Cpeb4	1816.74	2.07054	0.10882	19.0272	1.01614e-80	4.53892e-79	807.177	2962.85	745.717	3293.56	642.28	2670.62	4170.86	804.782	2906.18	523.892	2687.15	750.08	492.653	2595.4	695.886	2523.74	752.055	2569.56	766.268	2974.11
426	Slc2a6	8033.01	3.95067	0.207704	19.0206	1.15049e-80	5.12696e-79	1028.83	14445.1	773.26	18468.5	359.623	9947.12	17688.9	1210.12	16644.6	1418.91	13470.2	377.259	1274.11	15422.3	1338.01	13306.8	1126.93	12263.7	859.456	19236.5
427	Fam102b	523.819	2.10283	0.110649	19.0045	1.56447e-80	6.95547e-79	178.728	664.826	247.128	986.124	169.294	785.628	909.202	206.794	1072.07	129.646	810.295	200.305	200.1	834.756	205.258	738.887	231.98	955.236	213.319	736.806
428	Slc37a2	1723.73	-2.75393	0.144953	-18.9988	1.74519e-80	7.74084e-79	3177.26	246.183	2697.12	453.98	3388.02	545.504	489.626	2485.04	390.934	2635.3	343.626	4818.98	3191.68	509.805	2460.71	358.912	2474.06	499.249	2712.23	596.32
429	Il1rn	13189.9	3.82003	0.201089	18.9968	1.8134e-80	8.01488e-79	989.071	19952.7	1228.05	29285	1730.62	23444	30382.2	1185.68	27049.6	1628.55	18452.1	3784.37	1394.68	31925.9	2156.06	23073	1931.73	13225.1	1407.55	29571.2
430	Pttg1	909.161	2.31374	0.121797	18.9967	1.81542e-80	8.01488e-79	297.414	1469.71	279.196	1736.23	334.742	1573.88	1443.87	259.097	1498.21	312.44	1062.14	296.023	268.875	1596.42	489.213	1971.88	264.156	1214.9	253.226	1561.6
431	Mecr	617.095	2.22104	0.116958	18.9901	2.06003e-80	9.07369e-79	170.978	1125.57	182.318	846.95	246.88	1238.17	783.517	202.678	901.281	269.411	1134.95	259.324	226.617	1173.66	167.115	827.427	208.647	914.015	237.904	1224.48
432	Itga4	1602.14	2.02187	0.106583	18.97	3.01792e-80	1.32621e-78	811.368	2780.7	673.616	3207.77	571.252	2500.2	3184.53	627.743	2423.95	648.025	1866.53	689.863	654.997	2446.5	491.824	2184.76	520.956	2208.29	641.271	2908.56
433	Tnfsf15	257.978	5.18641	0.273453	18.9664	3.2356e-80	1.41858e-78	18.3946	521.19	11.4498	427.856	26.558	482.325	1037.59	12.6728	495.614	4.72774	151.235	7.34351	11.5006	544.646	13.2624	387.29	18.0496	331.174	13.7061	642.983
434	Txndc9	1230.98	1.15923	0.0612204	18.9354	5.82654e-80	2.54864e-78	743.651	1594.66	769.673	1672.71	721.608	1740.1	1838.56	664.413	1629.94	730.497	1463.16	844.326	796.478	1781.48	870.007	1875.15	766.611	1624.43	722.019	1770.15
435	Ccdc25	628.757	1.94645	0.102948	18.9071	9.97065e-80	4.35133e-78	220.814	788.615	254.3	1322.09	236.617	1039.92	1203.15	252.241	918.428	291.999	739.765	275.718	241.109	906.815	266.921	960.085	300.521	902.613	253.405	1200.02
436	Otud5	554.949	1.83838	0.0974375	18.8673	2.1198e-79	9.2299e-78	295.054	967.85	237.052	1002.04	273.805	801.442	915.217	242.933	927.064	212.997	781.684	201.036	271.086	809.291	265.816	763.164	188.982	698.942	241.111	1002.42
437	B3gnt2	2050.79	2.11383	0.112137	18.8504	2.91721e-79	1.26729e-77	683.955	2697.3	868.583	3890.94	693.041	3419.46	2437.59	603.055	3468.14	680.143	3158.5	627.282	888.691	4423.81	981.795	3202.19	907.321	3306.3	775.922	3301.88
438	Ntng2	151.205	4.17563	0.221522	18.8497	2.95343e-79	1.28009e-77	9.62653	427.536	18.1324	198.173	33.0127	215.394	188.397	13.7756	329.248	14.7681	349.846	15.6445	8.58714	325.745	7.03051	325.777	21.9246	245.109	12.0934	264.276
439	Gvin1	3610.59	3.85306	0.204763	18.8172	5.45779e-79	2.36015e-77	332.915	7162.19	290.842	7702.65	425.244	8174.48	7138.79	421.451	6371.94	318.794	5427.29	511.635	289.551	6464.03	1259.35	6390.62	441.528	6242.34	386.894	6459.31
440	Ext1	256.155	2.91315	0.155092	18.7834	1.03299e-78	4.45688e-77	57.4483	354.816	46.7418	474.161	46.8379	469.985	438.261	66.9139	561.937	50.9338	381.704	65.7364	44.1148	407.439	80.0379	349.518	97.6031	423.219	44.578	661.119
441	Gpr31b	81.8452	5.04074	0.268409	18.7801	1.09952e-78	4.73317e-77	2.59369	149.369	3.61516	199.002	6.06793	107.548	251.619	3.44813	165.383	3.81848	195.031	7.59713	1.27006	180.326	4.85316	120.755	3.8533	78.1143	8.47882	144.16
442	Arl5c	992.208	2.92824	0.156119	18.7564	1.71533e-78	7.36739e-77	367.941	2260.37	237.068	1814.73	194.439	1374.91	1901.36	281.431	1936.55	183.478	1421.58	137.843	337.356	2006.17	204.374	1825.19	188.024	1424.27	176.287	1570.78
443	Stip1	2013.84	1.92995	0.102923	18.7514	1.88613e-78	8.08267e-77	689.041	3871.26	721.918	3137.31	781.603	2692.95	3280.97	672.027	3223.22	982.655	3047.74	1198.89	818.752	3574.74	734.57	2758.31	906.114	3012.13	854.416	3318.15
444	Rgs2	1325.93	-3.41274	0.182225	-18.7282	2.91615e-78	1.24685e-76	2017.31	192.248	2237.64	266.903	2017.21	391.797	172.888	1966.3	205.101	2697.84	119.474	2564.88	2203.87	166.615	3350.96	203.279	2669.18	152.592	2509.34	413.249
445	2021-09-11	1180.12	2.23779	0.119574	18.7146	3.76119e-78	1.60455e-76	300.232	2254.1	407.979	1834.81	402.995	1504.31	1874.08	325.495	2289.78	509.765	2128.86	544.644	317.228	1974.36	356.493	1915.96	549.993	2011.4	402.385	1697.57
446	Trafd1	3491.35	2.67919	0.143369	18.6873	6.27665e-78	2.67166e-76	1171.52	5091.71	1026.54	7343.31	588.463	6411.34	6364.52	964.544	5600.58	718.766	5134.6	700.112	1309.99	6345.33	1349.8	4788.3	762.57	5622.4	849.269	7683.33
447	Mecp2	435.427	2.29816	0.123015	18.6819	6.95292e-78	2.95289e-76	158.557	686.537	133.554	868.891	155.645	720.914	790.561	124.957	765.634	211.974	736.416	129.666	157.325	791.936	127.822	580.664	129.368	442.71	145.65	849.769
448	Trim30d	1408.33	3.66649	0.196357	18.6726	8.27998e-78	3.50864e-76	195.725	2587.48	175.199	3196.78	163.639	2750.62	3051.67	190.535	2681.89	121.142	2154.57	177.65	191.554	2628.02	547.396	2449.63	143.087	2257.83	158.142	2344.12
449	Polr2g	1239.06	1.88059	0.100753	18.6653	9.49132e-78	4.01299e-76	577.149	1673.12	528.768	2168.73	589.195	2378.76	2243.53	393.743	1643.7	521.484	1337.9	552.159	559.854	1831.7	490.17	1925.64	576.201	2030.08	510.613	2248.61
450	Ptpn23	1049.54	1.774	0.0950893	18.6562	1.12543e-77	4.74781e-76	534.759	1564.52	448.356	1634.25	421.286	1341.26	1619.8	489.358	1749.77	613.492	1578.78	406.924	438.798	1498.33	373.308	1434.39	476.924	1744.39	547.692	2074.4
451	Srgn	3511.17	2.64724	0.142032	18.6383	1.57244e-77	6.61889e-76	946.14	7332.12	894.24	7767.35	596.788	3727.21	6335.69	1025.2	6642.1	1060.25	4263.06	695.384	970.126	6696.97	1265.32	6741.64	1179.04	5315.83	1040.96	5727.96
452	Gsr	1924.82	2.70732	0.145279	18.6353	1.66225e-77	6.98145e-76	373.421	3663.86	399.142	2416.65	545.663	2418.16	3092.92	426.082	3646.47	704.227	3997.29	361.862	408.957	3915.78	523.696	3714.41	733.489	3639.2	636.244	2878.85
453	Tbc1d8	132.741	-3.05001	0.163671	-18.6349	1.67325e-77	7.01212e-76	246.247	29.2427	234.159	15.1078	295.281	31.9576	25.8972	190.831	32.3401	219.169	46.5818	258.358	256.896	19.4157	211.624	55.3502	218.399	20.7672	215.016	32.1762
454	Arid5a	410.538	3.20689	0.172463	18.5947	3.54698e-77	1.48317e-75	94.8281	859.393	95.9062	904.958	75.3819	615.725	644.902	85.1059	673.63	80.8337	556.652	42.1383	95.4436	993.932	54.7854	697.004	77.2631	422.172	104.267	1036.44
455	BC094916	349.907	4.01306	0.215917	18.5861	4.16204e-77	1.73653e-75	33.2196	574.658	40.9377	760.179	67.0151	790.847	1263.96	40.6505	549.409	28.6617	442.678	57.251	16.3481	566.089	49.8908	500.69	26.7195	432.458	44.6031	711.888
456	Ist1	1405.28	1.68794	0.0908226	18.585	4.24974e-77	1.76923e-75	731.657	2160.38	717.707	2387.21	469.403	2399.83	2129.02	668.536	1986.11	668.197	1904.97	581.381	763.002	2300.87	753.526	1665.14	646.186	2105.46	667.203	2399.87
457	Ralgds	1731.97	3.05173	0.16426	18.5786	4.78598e-77	1.98812e-75	480.819	2029.57	309.079	2898.65	474.569	3246.13	3081.44	371.572	3598.05	253.907	3120.64	557.935	504.42	3978.29	231.35	2774.17	257.229	2528.29	284.694	3658.64
458	Phf11d	4320.18	4.83653	0.260433	18.5711	5.50875e-77	2.28336e-75	140.194	8647.09	168.712	9864.67	204.686	7659.5	9175.81	165.775	7719.66	228.994	6671.95	342.591	245.127	8763.53	1003.19	7923.96	218.503	7334.37	210.687	9714.66
459	Fbxw11	1695.39	1.55468	0.0837325	18.5672	5.92008e-77	2.44852e-75	785.65	2337.15	771.474	2844.14	815.027	2637.01	2169.06	789.086	2667.84	957.248	2324.82	780.39	752.363	2847.33	953.7	2378.54	1139.56	2401.3	872.188	2683.87
460	Siglece	606.811	3.44918	0.185834	18.5605	6.70356e-77	2.76653e-75	76.6195	1419.02	59.0539	759.04	176.813	1174.96	1035.48	65.143	1114.78	127.263	1373	132.896	93.0219	1454.42	88.2716	1282.49	107.684	727.292	86.6645	782.292
461	Klf7	559.957	2.84962	0.153596	18.5527	7.75285e-77	3.19263e-75	126.141	834.475	166.238	1058.62	130.343	1122.74	1043.84	129.898	1018.03	141.865	806.997	197.936	101.945	1325.15	87.3132	985.824	100.187	578.546	179.693	1063.36
462	Itgb8	166.979	5.04943	0.272173	18.5523	7.81457e-77	3.21108e-75	6.92373	355.36	10.3344	318.481	15.8412	251.878	655.596	10.7361	375.319	4.60534	266.557	9.85527	11.3732	275.866	11.3227	290.364	1.9696	227.555	18.2607	221.374
463	Ublcp1	471.51	1.81437	0.098127	18.49	2.48396e-76	1.01848e-74	164.461	745.513	192.656	601.09	233.949	675.216	891.402	182.667	800.428	227.007	601.469	222.646	206.842	837.644	188.694	832.02	253.054	647.081	215.329	711.041
464	Gm7535	71.5632	5.49684	0.297331	18.4873	2.61401e-76	1.06949e-74	0	104.773	1.20436	63.8281	6.07299	198.489	162.112	2.93821	164.607	1.899	165.037	4.97728	2.54611	163.877	2.41746	135.84	2.14328	141.114	4.22569	103.161
465	Capza2	8410.91	1.15637	0.0626503	18.4576	4.53424e-76	1.85114e-74	4998.75	11770.6	5228.79	12630.2	4978.37	11879.7	12298	4757.55	11102.7	4479.02	9605.59	6021.52	5269.07	12637.9	5776.33	11208.6	5335.92	11718.9	5259.16	11261.5
466	Psme1	2821.09	2.00488	0.108716	18.4414	6.11098e-76	2.4895e-74	1140.88	4405.2	975.62	5174.89	971.656	4551.61	4708.16	929.258	4708.06	1055.49	3346.51	1176.99	1262.8	4851.2	1735.61	4792.21	975.865	3772.79	1044.78	4842.32
467	Bmyc	115.703	-4.64081	0.251842	-18.4275	7.90468e-76	3.21333e-74	308.821	8.88129	214.022	13.4061	176.236	11.4801	2.94383	197.038	6.6536	251.548	0	150.961	314.778	13.9993	217.651	2.11902	183.428	11.7988	209.16	19.1328
468	Kcnk13	316.908	-3.36525	0.182652	-18.4244	8.37422e-76	3.39693e-74	578.392	72.7225	578.315	40.9473	545.228	35.2735	29.0934	448.937	56.5092	714.595	121.276	675.331	528.547	43.8393	507.596	52.2908	631.184	98.498	544.852	34.7221
469	Irf1	1538.81	2.82474	0.153391	18.4153	9.90062e-76	4.00754e-74	489.536	2541.62	391.643	3004.02	290.402	2277.8	3223.3	416.125	3222.42	259.402	2138.93	287.011	544.371	3240.9	554.687	2444.11	260.785	1967.86	323.897	2897.28
470	Ikbkb	1754.96	1.32101	0.0718247	18.3922	1.51799e-75	6.13138e-74	1059.36	2650.59	1012.08	2667.58	861.165	2325.74	2811.76	1002.77	2467.15	941.422	2141.71	1179.84	1047.85	2707.67	1013.35	2346.11	904.225	2147.34	1006.5	2804.98
471	Il6ra	281.177	-3.96684	0.215704	-18.3903	1.57246e-75	6.33793e-74	719.134	30.403	584.544	20.7985	362.959	50.7701	14.7805	534.697	39.9439	488.851	45.3713	417.266	677.252	31.8134	525.675	13.5344	458.545	26.2221	505.019	75.9644
472	Rasgrp1	199.313	5.56989	0.303125	18.3749	2.08585e-75	8.38937e-74	5.70037	382.447	9.76236	337.767	28.0084	358.464	895.25	5.13326	394.906	3.06458	177.03	6.49106	8.30571	393.46	4.90313	365.494	4.88626	293.323	9.43125	302.422
473	Sh2d3c	334.489	-2.92601	0.159464	-18.3491	3.35842e-75	1.34791e-73	609.937	63.0108	535.935	75.0951	408.695	58.1302	73.5435	544.067	53.1847	741.845	55.3788	566.681	664.962	61.5397	570.513	123.816	578.636	83.044	667.906	153.863
474	Cyb5r1	862.075	-1.37418	0.0749071	-18.3451	3.61444e-75	1.44761e-73	1400.96	436.462	1126.84	441.077	1171.66	484.503	538.077	1182.3	412.838	1351.84	475.611	1213.43	1408.19	417.805	1170.48	527.945	1170.85	550.741	1251.5	508.398
475	Dhcr7	260.451	-2.48468	0.135521	-18.3343	4.4042e-75	1.7602e-73	497.997	77.1427	468.771	69.276	402.628	81.1896	99.9454	315.742	60.3441	489.019	90.8304	389.508	546.039	81.7671	453.176	54.8946	469.591	89.9398	369.785	101.438
476	Mid1ip1	700.887	-2.80348	0.153154	-18.305	7.55326e-75	3.01242e-73	1425.68	210.679	1231.75	160.363	764.546	100.107	126.659	1244.94	283.456	1360.15	192.059	1060.94	1283.64	187.866	1254.18	128.613	1240.37	175.067	1391.33	195.346
477	Mvp	5137.4	1.64404	0.0898814	18.2912	9.71748e-75	3.86744e-73	3031.31	8274.28	2288.14	7857.19	1894.49	7232.08	7701.84	2153.14	7699.72	2891.3	7739.58	2716.06	2827.5	8703.75	2253.57	6641.46	2424.67	6628.89	2424.05	9364.98
478	Fblim1	455.887	-2.97351	0.162577	-18.2899	9.96422e-75	3.95734e-73	1195.58	111.371	907.096	97.6283	756.759	101.34	175.473	889.114	81.7867	586.637	79.7391	593.612	970.362	121.308	685.066	80.3203	678.723	101.654	829.222	74.9396
479	Ywhaz	10347.2	1.34832	0.0737625	18.2792	1.21231e-74	4.80468e-73	5418.64	15720.1	5773.51	17303.5	5117.07	13235.5	15591.9	5310.57	15343.7	5139.04	12477.8	6508.59	5568.65	16267	6279.26	14218.6	6679.97	14378.2	6565.51	14046.5
480	Ddx58	3495.78	3.58106	0.19602	18.2688	1.46509e-74	5.79441e-73	499.225	5992.34	422.445	7495.28	634.513	6742.15	7035.46	434.811	6165.78	525.307	5428.18	384.092	515.01	6679.66	1338.45	5984.76	377.435	5805.97	267.933	7186.85
481	Slc31a1	3777.44	1.71995	0.0941579	18.2667	1.52396e-74	6.01472e-73	1995.51	7184.16	1759.35	5877.94	1515.19	4749.2	5784.27	1725.49	6139.43	1588.53	4991.95	1847.59	2193.48	7440.73	1612.51	5596.05	1656.75	4696.35	1698.74	5495.52
482	Golga3	1260.19	2.02177	0.110686	18.2658	1.5482e-74	6.09774e-73	554.665	1733.01	440.011	2446.61	468.727	2685.11	2451.77	482.867	1708.35	459.716	1808.42	581.707	468.709	2003.32	525.957	1426.48	478.259	1621.58	517.907	2340.61
483	Gmnn	272.893	-3.81947	0.209144	-18.2624	1.64842e-74	6.479e-73	346.948	30.3732	391.986	51.1544	625.82	46.0202	46.9086	353.857	26.1196	591.11	29.9947	821.14	374.832	13.6722	418.293	37.246	642.433	41.304	531.29	37.3653
484	Ccdc50	2368.1	1.87439	0.102717	18.2481	2.14259e-74	8.40392e-73	946.042	3978.98	939.041	4191.08	923.632	4334.71	3669.27	911.769	3268.27	936.531	3320.03	1421.01	876.37	4052.32	935.871	3496.24	880.505	3268.81	1377.22	3634.26
485	Parp9	2011.37	2.97548	0.163239	18.2277	3.11131e-74	1.21784e-72	421.185	3349.71	413.802	4158.51	389.71	4073.91	4013.97	360.36	3239.15	330.144	2846.22	389.282	465.5	3525.14	1003.26	3120.04	318.938	3400.11	456.795	3951.63
486	Sgk3	1700.9	1.70755	0.0937158	18.2205	3.55112e-74	1.38713e-72	636.503	2727.53	850.62	3053.18	801.417	2830.51	2766.36	851.412	2342.98	597.654	2100.5	881.792	689.467	2712.15	967.953	2213.38	802.83	2615.26	892.851	2683.76
487	Suv420h2	164.388	-3.53923	0.194857	-18.1632	1.01023e-73	3.93804e-72	385.492	52.6235	296.748	19.5879	209.483	30.4059	28.3064	319.242	22.6465	252.766	18.5909	207.351	423.76	44.0963	276.932	22.5283	316.473	31.604	317.779	11.3387
488	Plek	23950.2	2.33185	0.128499	18.1468	1.36002e-73	5.29069e-72	9826.86	46766.2	9572.94	39669.6	5103.23	30440.6	45565.5	8814.53	39722.5	6101.62	40254.7	4831.74	8520.52	43964.3	8397.03	36940.4	8936.58	39914.9	9277.24	36383.8
489	Sptlc2	2785.9	1.69069	0.0931796	18.1445	1.4202e-73	5.51353e-72	1309.03	3914.53	1266.08	4410.1	871.303	3930.73	5281.31	1200.03	4763.93	1380.14	3716.05	1284.24	1469.34	4542.69	1430.94	4059.95	1465.98	4053.94	1517.38	3850.36
490	Cd28	187.949	-4.90428	0.270495	-18.1307	1.82353e-73	7.06487e-72	349.531	10.7793	465.548	14.0136	294.207	9.65203	13.3052	488.471	7.47592	222.567	9.47706	152.6	436.138	22.2421	525.526	5.61451	278.691	12.2252	421.39	19.5214
491	Rnf145	475.181	2.30191	0.127106	18.1102	2.64983e-73	1.02453e-71	136.695	781.469	138.133	943.493	170.568	928.632	553.564	231.494	756.401	157.748	680.298	127.452	172.927	1051.72	141.999	795.462	186.881	675.205	139.336	734.157
492	Atp6v1e1	6449.87	1.2007	0.0663138	18.1064	2.83719e-73	1.09474e-71	4261.19	9295.96	3845.96	8993.83	3500.57	7754.68	10306.6	3629.27	9823.12	3961.99	7132.51	4148.27	4117.34	9711.77	3993.12	9127.85	3876.19	8451.05	3789.21	9276.97
493	Ube2d3	5351.44	1.49862	0.0828904	18.0796	4.61694e-73	1.77785e-71	2503.02	8019.45	3046.09	8778.97	3217.5	7059.41	8290.4	2612.62	7754.07	2229.81	6804.79	2816.94	2551.49	9301.38	3068.97	8381.86	3184.27	8246.16	2747.86	6413.75
494	P4ha1	1540.13	1.61154	0.0891398	18.0788	4.68547e-73	1.80059e-71	799.747	2678.75	642.043	2340.67	754.495	2263.76	2425.16	619.519	2436.53	734.169	2318.62	1060.78	742.586	2469.03	807.843	2152.18	764.232	2067.96	657.356	2067.2
495	Dnmt3a	1326.98	-2.21632	0.122679	-18.066	5.90556e-73	2.26487e-71	2318.18	514.776	2176.59	615.563	1550.22	485.922	378.38	2149.65	521.528	2080.72	336.209	1916.57	3009.7	552.731	2240.65	425.628	1992.76	343.033	2408.38	522.397
496	Nfkb1	1140.38	2.51184	0.139094	18.0586	6.75229e-73	2.58438e-71	336.604	1451.32	274.267	2218.7	218.472	1493.32	1516.49	376.368	3078.19	362.926	1719.67	337.707	400.902	1969.43	387.937	1670.47	337.334	1850.35	378.604	2428.57
497	AI467606	279.506	-2.65096	0.146946	-18.0404	9.38739e-73	3.58572e-71	498.337	122.188	446.523	56.4462	430.489	32.9788	76.7184	525.288	102.139	519.264	88.0789	427.627	568.491	73.7454	499.249	99.2558	467.715	69.109	432.157	54.3191
498	Wfdc18	72.0954	4.46511	0.24755	18.0372	9.94659e-73	3.79169e-71	9.69084	163.832	6.69443	104.834	7.02299	118.015	140.17	8.40058	162.782	4.45637	141.563	2.58641	9.23401	196.285	10.5356	134.191	3.87238	81.9724	3.1918	132.578
499	St6gal1	332.236	-4.88928	0.271269	-18.0237	1.26856e-72	4.82612e-71	749.49	11.9108	795.621	13.2465	497.646	37.4943	44.146	747.959	10.6437	536.371	27.1838	372.798	830.171	5.82428	597.61	13.0256	593.622	17.3444	679.664	62.9513
500	Ddi2	580.355	-2.00956	0.111615	-18.0044	1.80079e-72	6.83724e-71	923.657	135.303	884.991	218.221	883.291	204.91	187.968	913.551	299.416	922.448	191.407	907.055	1137.6	222.8	967.903	262.865	1055.6	281.01	738.999	268.098
501	Uba7	2208.03	2.43712	0.135525	17.9828	2.65489e-72	1.006e-70	792.019	3895.82	590.811	4070.31	629.893	3929.27	4035.71	588.485	3730.58	584.651	3003.19	567.776	938.695	4590.26	1076.26	3072.77	527.583	2664.25	599.688	4272.65
502	Trp53i11	201.644	4.13322	0.230271	17.9493	4.85596e-72	1.83636e-70	34.5853	387.766	21.0217	455.547	44.4197	298.268	356.739	16.0865	373.261	29.3039	352.2	18.3641	4.75155	475.837	26.3801	351.877	11.5361	245.585	14.3424	515.006
503	Id3	111.643	5.6481	0.314813	17.9411	5.63185e-72	2.12555e-70	7.32596	330.964	5.10608	151.024	4.15526	113.443	126.079	3.33415	312.779	6.64966	154.296	5.87578	0	418.504	2.28499	291.363	3.22506	133.32	4.33065	158.796
504	D16Ertd472e	89.7732	4.10777	0.22905	17.9339	6.40636e-72	2.41306e-70	9.52141	205.744	6.51071	135.404	8.77818	102.382	251.839	6.55543	177.213	16.9133	122.842	8.45003	12.5863	166.997	16.9339	183.875	7.75643	247.2	10.5151	97.4479
505	P2ry1	125.031	-3.09356	0.172558	-17.9277	7.1665e-72	2.69404e-70	243.658	21.8592	218.87	12.873	149.081	26.8406	26.1945	266.282	29.1148	179.681	34.8516	197.015	270.503	32.065	240.238	37.1704	205.844	17.7075	266.232	24.5391
506	Kank2	109.111	-3.85191	0.214862	-17.9274	7.21353e-72	2.70636e-70	301.113	26.0087	231.409	13.3711	158.32	20.1476	17.7498	191.695	10.4644	200.129	22.5669	163.233	232.805	11.4567	173.428	13.5145	221.03	5.82168	151.684	16.2706
507	Zfp263	2368.45	1.7306	0.0968734	17.8646	2.22709e-71	8.33905e-70	1299.13	4095.44	1074.18	4252.01	948.929	3395.41	4462.35	1059.19	3290.3	886.989	2991.15	1447.92	1159.32	3170.35	1020.05	3336.43	1008.85	3610.79	1056.71	3803.39
508	Gas7	7055.89	1.64776	0.092302	17.8519	2.79403e-71	1.04413e-69	3504.71	10203.6	3073.86	11387.1	3627.23	12690.8	11601.4	3668.51	9992.06	2930.11	9315.37	4381.04	3855.92	9611.08	3683.3	10326.4	2548.74	10349.5	2866.42	11500.6
509	Sap30	315.759	2.3847	0.133769	17.827	4.36167e-71	1.62676e-69	79.3563	374.176	107.245	709.815	124.049	505.241	421.968	70.5713	559.129	113.79	513.842	86.9033	83.7323	609.317	119.033	531.065	117.66	421.234	116.69	650.365
510	Rsl24d1	779.319	1.05827	0.0594196	17.8101	5.89529e-71	2.19443e-69	505.42	1050.06	469.585	1172.27	562.377	1086.7	987.001	443.403	1059.33	510.611	1008.95	521.152	519.256	1062.38	523.077	1027.54	517.122	928.22	482.246	1149.66
511	Cpd	2810.86	2.18524	0.122704	17.8091	6.0119e-71	2.23346e-69	766.654	4410.95	1053.82	4170.83	663.049	3869.14	4147.23	964.464	6399.53	1055.91	4646.51	1260.7	880.776	4752.5	987.9	4320.23	1373.42	5374.12	1124.13	3995.39
512	Ebi3	3677.97	2.50152	0.140563	17.7964	7.53101e-71	2.79236e-69	1034.45	6364.36	846.499	6566.39	1745.8	7225.67	6769.17	872.944	6406.44	957.6	5307.05	1720.71	1111.04	6526.65	1013.29	6382.65	898.762	4528.16	831.878	6449.96
513	Il2rg	3234.65	1.32637	0.0746352	17.7714	1.17768e-70	4.35809e-69	1699.75	4612.64	1562.93	4717.59	1953.23	4931.08	4901.33	1588.34	4746.91	1988.51	4043.36	2009.89	1951.54	4870.47	2236.8	4529.7	1912.52	4064.39	1547.88	4824.09
514	Tnfrsf1a	1915.26	1.45335	0.0818612	17.7538	1.61016e-70	5.94696e-69	1130.31	2658.3	892.7	3272.85	918.748	2615.03	2705.36	1015.64	2913.68	1168.61	2361.27	977.617	1106.78	3045.92	972.393	2471.9	1138.63	2520.04	930.517	3488.81
515	Nf2	755.759	-1.86883	0.105319	-17.7444	1.90381e-70	7.01786e-69	1260.01	194.41	1014.65	301.065	917.704	339.135	286.062	1200.72	288.239	1141.58	389.312	1278.36	1153.71	341.279	1339.66	356.032	1200.71	416.138	1366.29	330.12
516	Ncapg2	215.15	-3.23833	0.182586	-17.7359	2.21585e-70	8.15227e-69	252.747	26.0161	380.861	31.199	295.029	63.0801	42.8908	337.744	27.52	494.776	30.1121	408.505	363.224	26.7309	408.343	41.592	517.696	60.1656	435.095	59.663
517	Cd47	3292.77	1.565	0.0882475	17.7342	2.28177e-70	8.37854e-69	1508.86	4570.92	1706.84	5731.91	1726.18	5132.6	5539.03	1647.13	4747.58	1362.23	3501.4	1832.37	1500.11	5012.93	2109.08	5347.16	1674.51	4987.46	1577.94	4639.16
518	Ormdl1	438.174	-1.66142	0.0938785	-17.6976	4.37685e-70	1.60406e-68	649.503	171.153	699.446	184.498	603.623	174.419	171.881	718.822	228.036	639.957	225.955	600.114	729.276	242.461	676.179	214.424	735.494	281.366	626.72	190.145
519	Dtx3l	2039.65	2.89257	0.163621	17.6785	6.14368e-70	2.24724e-68	480.104	3396.97	463.385	4497.02	508.282	3626.3	4497.97	451.764	3349.23	269.142	2760.23	444.04	497.978	3936.22	983.132	3269.92	357.29	2985.42	393.33	3625.36
520	Arhgap31	1171.92	1.46081	0.0826941	17.6652	7.77354e-70	2.83794e-68	699.082	1769.49	640.142	1623.53	649.679	1461.15	2114.37	620.098	1790.71	637.997	1617.25	653.031	654.088	1758.24	453.454	1595.3	612.15	1481.97	617.597	1989.08
521	Wwp1	1141.51	-2.79094	0.157997	-17.6645	7.87676e-70	2.87011e-68	2511.77	263.14	2520.06	331.412	2137.17	357.775	284.871	2185.64	243.088	896.119	326.046	2226.28	2488.94	299.682	1708.39	244.536	1242.74	276.121	2028.04	258.295
522	Ccl12	4421.6	6.81624	0.385967	17.6601	8.50173e-70	3.09189e-68	31.1352	7766.39	24.736	9390.79	204.564	12580.1	9185.9	18.9517	7967.68	68.8025	5429.18	201.999	52.0685	11524.7	71.9498	10866.5	59.6767	4641.65	40.1921	8304.95
523	Atxn1	248.281	-2.18798	0.123898	-17.6595	8.59508e-70	3.11987e-68	480.536	55.2503	465.387	86.1065	436.198	120.685	114.868	383.15	73.054	317.559	66.1676	419.334	436.688	81.3044	424.264	113.189	360.125	86.6542	369.068	76.0429
524	Tec	566.008	-2.12844	0.120545	-17.6569	9.0131e-70	3.26536e-68	967.415	279.709	890.787	162.792	563.105	194.793	252.443	1060.03	185.15	924.089	163.663	820.225	950.328	212.624	1079.61	215.888	992.163	257.624	957.669	190.057
525	Cp	1206.03	4.15236	0.235256	17.6504	1.01065e-69	3.65452e-68	204.761	3043.97	65.5511	2559.11	163.695	3110.34	2089.35	169.598	2199.97	78.1993	1360.68	122.553	247.264	3239.16	101.416	2035.75	68.5545	1424.34	68.4318	1767.94
526	Rap1b	3610.76	1.78763	0.101288	17.6489	1.03836e-69	3.74757e-68	1474.46	6010.8	1792.18	6402.77	1673.11	4605.33	5189.6	1816.02	6223.44	1095.28	5559.93	1413.08	1348.4	6166.47	2005.39	5771.7	1872.02	5290.67	1728.09	4776.45
527	Clic5	112.632	5.20006	0.294684	17.6462	1.08808e-69	3.91955e-68	5.2704	142.973	1.80789	402.622	9.41184	199.07	427.56	8.26712	195.305	5.66155	153.993	3.12141	8.95649	120.942	6.02006	154.837	5.16108	160.057	8.42483	233.184
528	Adar	1610.17	2.19183	0.124277	17.6366	1.28891e-69	4.63422e-68	584.904	2643.66	501.125	2908.02	487.605	2562.07	3019.44	525.347	2324.19	507.254	2411.75	623.117	564.262	2718.04	1033.54	2225.72	465.567	2474.91	497.459	3125.36
529	Dram1	1510.13	2.13285	0.120934	17.6365	1.29187e-69	4.63609e-68	602.833	2692.23	569.812	2651.66	329.799	1983.85	2997.7	752.986	2776.64	542.701	1973.93	461.372	569.128	2802.59	624.275	2367.4	584.413	2008.57	575.294	2335.35
530	Wars	1253.52	1.6648	0.094421	17.6316	1.4083e-69	5.04436e-68	598.286	1881.37	588.279	2102.42	523.985	1485.14	1816.29	484.778	1850.42	738.491	1874.51	664.187	604.588	2047.79	559.005	1735.75	674.435	1716.88	569.296	2554.56
531	Psma3	4615.86	1.50313	0.0854513	17.5904	2.91636e-69	1.04264e-67	1960.01	6841.66	2170.24	7858.04	2637.16	5644.1	7273.4	2099.18	6783.9	2510.63	6134.33	2882.02	2101.24	7019.48	2855.31	7904.24	2531.43	6435.52	2328	6347.22
532	Kremen1	486.516	2.20854	0.125674	17.5735	3.93102e-69	1.40275e-67	174.839	835.055	159.116	812.433	151.98	676.669	687.544	147.19	849.038	228.399	862.488	131.933	205.521	1051.82	134.571	602.248	181.298	659.085	220.343	958.749
533	Zfp652	319.412	-2.62669	0.149518	-17.5678	4.35075e-69	1.54962e-67	645.913	65.7263	650.845	85.3628	337.686	128.14	79.948	610.807	91.3395	493.395	87.0961	494.838	735.342	73.0225	430.274	115.219	552.617	70.2679	557.009	83.3938
534	Trerf1	217.068	-2.15841	0.122953	-17.5547	5.47554e-69	1.94659e-67	425.053	51.0235	343.215	78.525	297.444	115.237	53.6311	332.93	82.2869	385.129	77.7653	382.114	332.365	85.6003	274.116	82.6295	413.457	70.9936	370.476	87.37
535	Gsdmd	1663.99	1.73743	0.0990486	17.5412	6.94531e-69	2.46448e-67	883.324	2655.75	731.542	3073.26	659.661	2402.62	2656.12	736.933	2763.6	682.137	1835.27	874.287	807.712	2923.88	942.18	2406.84	718.083	2047.91	647.991	2830.64
536	Eif2ak2	1125.33	2.02426	0.115546	17.5191	1.02511e-68	3.63073e-67	302.959	1639.02	439.817	2038.13	469.856	1963.36	1930.17	403.958	1779.61	357.024	1506.88	433.101	532.228	1971.47	700.787	1781.01	389.599	1802.64	425.245	1639.78
537	Cept1	2167.47	1.78972	0.10219	17.5136	1.12884e-68	3.99068e-67	1102.85	3158.18	980.8	3513.98	779.387	2598.31	4021.02	1049.2	3490.5	841.911	3205.46	703.489	1144.63	3862.89	1151.78	3376.65	861.165	3232.76	1126.35	3148.04
538	Gab3	189.9	-3.5592	0.203301	-17.507	1.26602e-68	4.46732e-67	436.433	24.079	401.933	18.007	270.415	61.1259	27.1817	359.225	20.1311	327.717	17.5723	233.964	437.937	23.5441	345.992	29.1731	338.136	49.5836	359.547	16.3054
539	Lamtor4	427.06	-1.32696	0.0758423	-17.4963	1.52761e-68	5.38036e-67	677.156	178.257	611.771	236.912	602.53	251.526	246.852	508.986	249.385	658.356	285.875	632.878	680.876	231.494	623.473	251.633	547.006	242.711	577.298	246.229
540	Snap47	380.466	-1.60644	0.0918567	-17.4885	1.75196e-68	6.15912e-67	568.067	236.312	532.268	143.105	480.157	173.758	218.134	530.019	182.518	649.678	206.141	599.62	658.058	167.138	583.01	200.512	551.664	216.234	560.063	152.861
541	Magohb	174	2.65651	0.152	17.4771	2.1416e-68	7.51501e-67	33.7334	309.244	31.8312	327.034	65.8491	392.299	245.247	40.9456	249.983	42.0528	234.586	64.1118	38.9491	275.141	61.9871	349.687	38.5911	308.647	56.5629	313.526
542	Pik3ap1	14780.3	1.84186	0.105427	17.4705	2.40376e-68	8.41937e-67	6259.46	24416.2	5731.59	25798.5	8150.84	24014.8	22181.9	5029.06	21654.4	5337.6	21544.5	9577.08	5917.17	24087.6	6530.55	19831.7	5975.09	20768.7	5954.89	26844.1
543	Lpxn	2188.3	-1.69163	0.0968691	-17.4631	2.73867e-68	9.57474e-67	3194.2	730.091	3300.33	1185.3	3343.4	1138.13	748.946	2777.98	965.995	3170.72	1046.82	3658.37	3289.2	935.494	3753.58	1064.01	3532.36	1227.49	3415.73	1287.89
544	Spty2d1	512.522	1.18679	0.0679975	17.4534	3.24308e-68	1.13174e-66	352.96	706.476	326.625	722.039	287.31	722.883	782.511	332.75	668.146	302.992	657.971	262.086	295.504	698.873	296.251	701.646	350.91	750.95	326.521	705.039
545	Ifi203	3477.37	4.36845	0.250699	17.4251	5.32482e-68	1.8548e-66	213.122	5984.92	241.148	7949.63	348.024	7282.03	8238.57	275.076	6754.56	144.759	5077.61	256.967	333.318	6270.95	1021.51	7573.01	173.978	5464.2	211.24	5732.86
546	Trim30a	4516.43	3.33081	0.191442	17.3986	8.4607e-68	2.94172e-66	678.737	8614.8	645.464	9219.98	671.131	7736.28	9903.9	733.95	8762.55	523.602	6376.03	784.647	640.361	8425.1	2137.81	8165.56	721.485	7659.94	635.541	7291.82
547	Stat3	2223.32	1.62081	0.0934288	17.3481	2.03787e-67	7.07255e-66	1344.59	3269.9	1144.85	3924.25	914.886	3928.63	3284.89	1071.86	3201.95	970.014	3172.15	1133.05	1226.04	3374.06	997.317	2713.22	1137.27	2620.57	967.747	4069.16
548	Triobp	981.211	2.3534	0.135687	17.3443	2.17976e-67	7.55121e-66	290.229	1272.44	334.318	1902.68	391.794	1941.19	1330.39	290.563	1613.72	260.497	1589.44	213.82	449.115	2185.3	363.32	1460.43	344.957	1179.92	280.678	1929.43
549	Plk2	8945.62	2.35998	0.136103	17.3396	2.36393e-67	8.17429e-66	2555.99	15302.2	2702.74	16111	2131.18	6890.58	18860.2	2733.51	16035	3368.57	14387	3157.3	2476.17	14311.8	3300.91	14884.4	3798.41	17227.9	2943.17	15734.4
550	Cbx3	803.959	-2.39965	0.13842	-17.336	2.517e-67	8.68776e-66	1109.34	185.104	1276.81	219.845	1460.11	334.109	200.347	1097.41	215.865	995.092	348.18	1824.58	1246.14	213.752	1419.36	315.931	1645.95	321.393	1439.1	210.759
551	Gng12	3136.68	1.83933	0.106101	17.3357	2.52887e-67	8.71289e-66	1604.82	5579.91	1312.99	5758.83	1567.4	4120.26	5314.88	1287.32	5149.41	942.67	3787.66	1243.71	1492.54	5977.79	1433.3	5074.17	1337.13	3811.63	1484.93	4452.22
552	Sord	650.377	-1.68395	0.0971643	-17.331	2.74626e-67	9.44473e-66	1139.65	291.769	1102.17	303.045	758.602	325.008	276.114	1001.16	315.539	906.894	247.516	996.317	1276.05	311.627	922.488	328.599	875.519	380.212	966.936	282.325
553	Idh1	2408.08	-2.19123	0.126628	-17.3044	4.3561e-67	1.49541e-65	4369.31	927.006	3978.61	656.322	2843.07	862.523	809.683	5004.52	807.743	2815.87	920.258	3516.48	4875.18	808.314	4674.6	929.691	3438.09	1244.48	3997.23	682.594
554	Tspan3	2104.71	2.02103	0.116802	17.303	4.46227e-67	1.52909e-65	795.754	4444.92	742.382	3019.73	809.256	3966	2255.92	804.995	3759.54	781.331	3099.67	891.988	900.427	4532.79	798.515	3315.85	921.231	2312.46	871.274	3070.1
555	Stard9	564.244	-2.70605	0.156546	-17.286	5.99692e-67	2.05127e-65	1003.49	80.3109	1133.21	144.246	571.47	132.915	164.182	1175.79	149.922	1024.93	231.8	658.689	1142.76	121.361	986.033	194.206	971.472	176.448	1110.91	110.726
556	Abcd2	196.004	-4.28296	0.247925	-17.2752	7.22681e-67	2.46751e-65	524.292	21.6667	386.888	22.2853	148.921	21.51	17.7521	472.767	13.9511	356.734	11.2735	155.17	527.101	28.0068	380.508	16.6291	376.306	17.4623	399.162	21.6925
557	Filip1l	315.021	2.08425	0.120727	17.2642	8.75584e-67	2.98422e-65	91.891	453.372	107.57	576.634	145.156	354.194	540.557	105.305	593.155	147.287	417.528	90.0345	122.24	582.594	138.142	519.138	142.835	520.597	120.795	531.404
558	Relb	1329.83	2.12985	0.123383	17.262	9.08621e-67	3.09126e-65	630.242	2177.39	457.212	2300.67	470.09	1954.89	2124.94	452.865	2472.38	549.478	2021.83	545.36	692.885	2408.05	400.231	1779.74	426.214	1664.01	322.925	2745.28
559	Ell2	1717.01	2.27395	0.131944	17.2342	1.46952e-66	4.99058e-65	524.634	3170.52	499.578	3222.39	821.927	2895.45	2698.87	498.96	3121.27	445.781	2802.54	880.107	379.795	2884.26	634.899	2752.93	695.646	2585.53	489.941	2335.15
560	Pmpcb	968.659	1.06946	0.0620592	17.233	1.50279e-66	5.09446e-65	643.98	1331.16	640.77	1388.37	524.679	1194.17	1352.66	635.697	1260.16	612.687	1201.68	723.898	575.854	1396.84	650.129	1292.47	658.136	1343.18	578.496	1368.15
561	Nlrp1b	71.5273	-4.29665	0.249333	-17.2326	1.51184e-66	5.11601e-65	117.24	0	136.53	8.77909	99.8039	14.5278	10.2791	141.407	4.23365	161.252	8.91619	176.236	125.779	6.32086	141.162	1.22828	136.302	5.99952	121.704	12.8446
562	Mical1	358.931	-4.49511	0.260942	-17.2265	1.68135e-66	5.6795e-65	921.022	46.7728	815.337	16.5439	347.474	14.6409	13.39	726.626	24.3058	772.139	91.159	293.431	855.502	28.1826	592.568	35.4993	715.564	37.9377	798.136	32.3949
563	Ggct	97.8859	3.66235	0.21262	17.2249	1.7284e-66	5.82807e-65	4.02355	182.791	17.8309	265.228	16.1799	178.253	163.922	11.9618	187.444	17.3353	108.928	17.1494	12.8786	234.309	17.5209	139.627	16.5085	196.743	15.141	153.943
564	Rhog	5113.43	1.5607	0.0906623	17.2145	2.06813e-66	6.96123e-65	3070.87	8169.34	2583.33	8665.17	2484.41	5637.51	7158.17	2527.41	8418.3	2620.13	7236.25	2117.79	3038.3	8373.45	2718.35	7884.06	2389	6148.29	2347.85	8680.54
565	Txnrd1	3156.48	2.84567	0.165448	17.1998	2.66642e-66	8.95918e-65	478.237	5698.57	672.527	4719.78	613.595	2750.69	5286.91	610.753	7094.96	1073.23	7048.29	739.331	674.685	5563.49	794.555	5442.01	1231.22	6718.79	820.272	5097.79
566	Rcn1	91.3459	3.1625	0.183889	17.1979	2.75294e-66	9.23353e-65	20.8222	218.335	24.4428	180.245	11.8714	116.524	138.334	19.2828	157.92	22.6223	178.513	9.06317	16.8164	176.002	28.8193	155.664	18.4376	181.025	16.8716	135.308
567	Slamf8	714.856	3.40891	0.198247	17.1953	2.88153e-66	9.64778e-65	167.383	1347.28	106.466	1344.78	89.9621	1024.6	1822.06	187.133	1448.26	68.2681	943.667	151.557	208.035	1662.03	89.3097	1268.21	66.3768	877.726	96.7404	1327.28
568	Lpar5	123.775	-5.89616	0.342992	-17.1904	3.13563e-66	1.04801e-64	337.16	0	248.547	1.37796	174.52	3.62293	3.86989	269.229	7.49184	238.597	8.12101	127.27	365.33	0	235.562	8.52885	221.788	1.98033	222.508	0
569	Znfx1	4675.42	2.4393	0.141932	17.1864	3.3591e-66	1.12072e-64	1357.69	8223.9	1048.23	8071.23	1215.77	7903.27	8076.41	1340.8	7880.37	1533.99	7553.1	1477.63	1215.18	8405.86	2952.29	7021.51	1279.51	7156.63	1143.05	8651.93
570	Mapkbp1	482.35	2.60437	0.151614	17.1777	3.90378e-66	1.30016e-64	94.0455	945.29	98.5324	924.616	176.778	463.71	863.347	99.4495	893.346	117.884	895.885	140.271	225.33	810.713	152.339	796.365	117.834	864.475	155.661	811.135
571	Gtf2f1	1150.12	1.39023	0.0809388	17.1763	3.99557e-66	1.3284e-64	593.125	1385.47	647.174	1636.86	626.968	1709.13	1677.94	509.859	1755.82	720.492	1530.57	806.802	599.863	1897.78	577.106	1578.42	683.205	1702.68	588.953	1774.14
572	Ndrg3	468.719	-1.62737	0.0948154	-17.1635	4.97914e-66	1.65252e-64	805.271	234.764	714.539	258.433	524.828	219.968	219.781	789.073	205.35	766.709	262.845	593.647	841.173	225.29	726.128	225.333	659.318	239.915	654.464	207.558
573	Acot2	132.652	-3.51113	0.204818	-17.1427	7.1225e-66	2.35975e-64	290.585	26.146	271.173	25.2533	387.528	38.4014	26.571	243.477	20.9626	207.649	19.0741	209.452	228.333	12.7179	228.291	10.4369	185.884	23.3452	186.9	10.8603
574	Lrrc59	1855.67	2.20716	0.128862	17.1282	9.15034e-66	3.02631e-64	459.659	2941.34	519.001	2947.34	652.822	2436.15	2723.91	509.07	3295.24	907.229	3299.07	938.388	558.93	3579.69	602.835	3039.22	868.235	3156.77	582.604	3095.95
575	Vmn2r11	162.534	2.41349	0.140967	17.121	1.03565e-65	3.41928e-64	54.4719	298.891	40.9788	332.796	68.1005	226.082	269.277	44.7323	263.104	41.5118	232.756	52.268	37.1089	290.27	81.8646	282.617	36.9898	216.3	57.9159	322.648
576	Zdhhc14	77.647	-4.81968	0.28153	-17.1196	1.06023e-65	3.49433e-64	181.283	0	152.526	2.97241	126.186	6.6736	7.39181	157.577	1.94013	132.49	7.57562	107.758	173.809	5.09177	153.228	13.5453	122.939	5.83098	194.121	0
577	Fndc3a	2235.89	2.17177	0.126901	17.1139	1.16895e-65	3.84598e-64	647.109	2692.68	838.642	4861.62	907.035	4098.32	4724.36	731.663	3183.26	758.314	2326.56	865.853	772.219	3700.7	1024.14	3868.24	680.89	2978.99	902.307	4154.86
578	Hip1	565.635	-3.63418	0.212415	-17.1088	1.27551e-65	4.18932e-64	1095.46	30.3039	944.924	53.4856	1112.48	68.7451	23.6782	893.659	137.145	952.402	138.679	1529.46	986.898	118.412	954.363	98.6631	930.945	76.6043	1076.93	89.461
579	Usp25	913.769	2.49474	0.145817	17.1086	1.27949e-65	4.19513e-64	193.966	1300.7	273.593	1640.18	141.705	1518.27	1541.16	286.624	2010.07	283.25	1388.63	245.942	239.175	1579.69	407.121	1384.93	284.224	1597.24	407.689	1551.21
580	Tpm4	14189.2	2.18524	0.12773	17.1082	1.28862e-65	4.21778e-64	3371.9	25020.9	4319.92	24949.2	5399.52	17896.4	23428.7	3799.9	23762.3	6219.76	21239	7541.39	4063.54	24677.7	4550.41	22986.4	6728.92	25690.1	5145.79	22991.4
581	Csf1	161.119	5.0338	0.294446	17.0958	1.59419e-65	5.20896e-64	8.32141	333.486	5.17955	326.431	14.3868	393.11	575.925	9.75679	319.108	22.8921	179.653	2.08771	5.0458	277.322	10.67	241.29	15.1459	181.844	8.9478	291.784
582	Tbk1	1658.41	1.19683	0.0700137	17.0942	1.64004e-65	5.34957e-64	1098.48	2498.99	982.873	2556.7	828.142	2171.33	2554.92	1067.1	2222.17	867.537	1958.12	1052.03	1071.74	2482.44	1077.05	2167.59	954.282	2308.25	1083.11	2165.31
583	Arf4	4138.92	1.40145	0.0820128	17.0882	1.81619e-65	5.91397e-64	2222.05	5908.73	2617.3	7523.16	1951.07	5634.35	6954.66	2388.34	5594.09	2257.23	5288.28	1830.85	2225.24	6307.88	2655.9	5833.01	2325.14	5312.48	2270.1	5678.56
584	Il4i1	78.3628	4.18272	0.244979	17.0738	2.32684e-65	7.56382e-64	1.90169	126.109	5.09919	135.163	10.2598	177.397	168.451	15.8533	161.376	13.0749	110.54	10.6807	3.13818	174.883	13.4082	142.202	5.80342	109.103	8.08016	174.733
585	Ubc	46460.8	1.55213	0.0909314	17.0692	2.51623e-65	8.16548e-64	24809.6	73541.5	21642.5	72305.4	18524	51830.6	72473.5	22624.3	69291.1	25590.6	72639.7	20594.7	28695.5	75456	27919.1	64887.2	22279.2	58985.5	23618.2	81508.1
586	Rnf213	7835.36	4.01487	0.235707	17.0333	4.65324e-65	1.50746e-63	561.903	11090.9	710.556	16764.9	505.796	12563.5	13191.2	783.171	19451.9	620.366	14832.7	796.958	865.039	15573.9	2862.86	13181.8	744.216	14691.1	688.413	16225.8
587	Nlrc5	137.142	3.55074	0.208469	17.0324	4.72259e-65	1.52732e-63	12.8109	252.439	26.0125	316.653	27.3095	242.459	259.245	21.955	441.696	11.985	179.607	19.8763	9.42874	258.494	32.1937	214.451	21.2035	213.897	29.5856	151.543
588	Stard3	2060.09	1.88864	0.110917	17.0275	5.13354e-65	1.6574e-63	1034.65	2997.54	799.25	3459.84	689.45	2755.97	3147.05	830.01	3415.33	912.35	2971.61	686.424	1075.76	4054.72	1157.22	2921.27	765.765	2658.25	824.577	4044.79
589	Mapk1ip1l	1879.4	1.30586	0.0767834	17.0071	7.28025e-65	2.34649e-63	1229.2	2644.35	1061.96	3028.19	998.726	2569.55	2909.57	1004.93	2630.83	851.485	2500.82	1054.99	1047.3	2984.03	1056.96	2390.08	1312.92	2451.11	1206.83	2654.27
590	Mfsd12	2337.53	-1.89175	0.111259	-17.0031	7.78988e-65	2.50649e-63	4977.7	779.65	3529.23	1041.04	2675.94	907.843	1071.51	3775.19	981.417	3692.27	1054.1	2664.64	4708	1059.55	3933.4	953.343	3434.12	878.241	3442.01	1191.31
591	F3	89.6388	6.67781	0.393061	16.9892	9.86458e-65	3.16868e-63	0	157.001	1.80596	163.231	2.20802	85.5695	228.415	3.91387	220.781	1.89729	145.529	3.21592	0	332.767	1.20788	182.709	0	80.7229	0	181.802
592	Itpripl1	497.908	-1.50536	0.0887122	-16.969	1.39199e-64	4.46379e-63	729.156	301.246	699.698	255.914	813.007	243.405	208.866	636.929	286.131	834.065	198.395	752.05	763.068	247.547	629.162	316.669	815.277	280.351	706.756	240.468
593	Morf4l2	3998.15	1.28452	0.0758499	16.935	2.48361e-64	7.95091e-63	2035.66	5958.84	2150.84	6048.51	2352.05	5601.03	5851.41	1966.23	5779.68	2299.81	4325.5	2866.65	2320.28	6394.78	2389.92	5483.18	2529.07	5430.59	2363.35	5815.57
594	Smyd3	185.066	-2.42151	0.142998	-16.9339	2.53045e-64	8.08722e-63	385.568	32.0963	281.084	36.6849	228.283	70.5109	63.6732	352.661	54.7363	301.239	66.9912	285.097	354.863	55.4912	297.874	52.7079	360.005	83.5	275.943	62.3081
595	Sgms1	1212.12	1.4402	0.0850925	16.9252	2.93568e-64	9.36654e-63	684.072	2017.73	629.544	1806.05	475.08	1619.16	1714.38	676.73	1894.02	766.139	1793.49	571.454	683.521	1624.46	560.147	1683.26	798.704	1726.16	679.493	1838.73
596	Atf6	724.174	-1.14426	0.0676412	-16.9165	3.39769e-64	1.08224e-62	1028.57	456	1044.17	421.585	807.635	458.369	418.461	950.78	421.354	943.084	445.567	1075.23	1017.79	489.974	975.371	443.522	1055.63	506.031	1072.31	452.058
597	Dhrs3	5791.96	-1.50648	0.0890865	-16.9103	3.77618e-64	1.20079e-62	10074.5	2643.73	8717.14	2933.04	7830.17	3641.88	2896.18	8328.45	2767.72	7884.48	2964.33	7908.9	10760.6	3116.96	8478.11	2598.51	7324	2707.73	8371.82	3891.08
598	Tmem184b	2902.8	1.98032	0.117143	16.9051	4.12278e-64	1.30881e-62	1318.62	4655.83	1006.69	5379.92	957.465	3444.31	4386	1003.59	4998.47	1616.39	4456.15	993.27	1051.32	5298.85	1352.32	4044.79	1331.43	3619.52	1110.5	6030.5
599	Trim36	269.336	2.52311	0.149259	16.9043	4.1859e-64	1.32663e-62	80.7952	610.576	105.61	450.137	79.5676	375.427	647.483	74.2483	493.563	75.5258	406.993	59.886	102.921	522.006	61.7347	419.835	79.9103	259.188	79.2173	402.105
600	D17Wsu92e	892.074	1.94764	0.115249	16.8994	4.54885e-64	1.43926e-62	343.664	1257.1	301.677	1492.39	233.775	1164.65	1289.64	331.686	1780.51	455.449	1484.88	385.127	365.091	1614.56	429.833	1229.44	425.795	1228.37	406.221	1621.61
601	Tmem254a	336.357	-1.83142	0.108411	-16.8933	5.04409e-64	1.59329e-62	555.794	144.135	463.282	120.159	400.213	125.867	139.593	555.885	123.314	629.537	179.309	535.489	488.179	127.33	503.994	168.134	554.799	182.574	550.098	179.456
602	Gtf3a	337.171	-1.69614	0.100415	-16.8913	5.21116e-64	1.64333e-62	553.716	142.27	481.373	155.53	411.985	179.8	134.893	484.787	152.766	617.971	206.957	554.45	561.612	150.237	438.53	135.608	504.194	194.354	540.494	141.893
603	Coro1c	4100.05	-1.23328	0.0730701	-16.878	6.52966e-64	2.0557e-62	6268.89	2576.28	5438.8	2220.87	4813.98	2016.9	2325.77	5176.78	2573.16	6033.32	2784.59	5788.59	6428.23	2639.45	5067.17	2400.96	6095.62	2339.18	6394.87	2617.53
604	Snx29	197.916	-3.19462	0.189652	-16.8446	1.14887e-63	3.61095e-62	478.577	51.5179	378.96	37.6219	354.666	50.3253	57.6837	367.17	25.3214	303.401	65.5263	295.88	383.731	21.2728	334.225	19.5211	310.369	53.4645	337.412	31.6644
605	Abhd17c	641.898	3.04279	0.181107	16.8011	2.39579e-63	7.51762e-62	108.159	1159.53	123.016	1312.54	79.661	577.77	848.197	125.375	1339.15	162.101	1172.06	137.505	90.6858	952.373	162.427	1208.51	211.967	1708.39	188.651	1169.9
606	Nupr1	493.783	3.252	0.193629	16.795	2.65643e-63	8.32172e-62	112.932	1110.97	68.1171	1128.25	90.3118	612.579	697.502	78.2143	883.666	88.5234	691.959	78.8859	135.786	1248.94	174.18	986.171	55.8985	542.713	64.9348	1025.12
607	Tspan14	812.752	-1.40128	0.0835199	-16.7778	3.54813e-63	1.10968e-61	1296.64	413.513	1098.56	378.81	981.543	414.399	401.692	1251.77	476.542	1261.78	631.336	1071.85	1086.19	479.562	1209.55	416.082	1221.36	439.433	1292.85	431.587
608	Lox	2879.8	2.8633	0.170695	16.7743	3.76234e-63	1.17474e-61	1139.68	6078.81	372.745	3840.36	503.329	4687.37	3850.65	800.501	5206.21	472.486	6623.1	911.276	738.523	5348.95	830.187	4756.95	709.023	6008	478.493	4239.29
609	Tiparp	791.134	1.88359	0.11248	16.7459	6.06278e-63	1.88991e-61	304.894	970.26	319.123	1064.81	449.199	1185.23	1783.85	292.667	1211.28	256.326	1065.48	380.586	350.614	1342.1	346.177	1115.05	313.962	1330.29	363.895	1376.88
610	Ube2l6	3583.99	2.70301	0.16171	16.7152	1.01598e-62	3.16186e-61	730.456	6311.93	717.744	6957.2	927.308	5687.11	6080.77	738.939	6377.12	748.449	5521.27	1170.9	878.263	6452.72	2073.6	6647.37	785.921	5187.32	776.44	6908.93
611	Tctn3	113.903	-3.50196	0.209621	-16.7061	1.1827e-62	3.67469e-61	247.43	38.3037	220.088	14.1156	147.01	22.6846	26.8756	212.442	17.2513	195.821	10.5011	158.66	247.693	16.7463	257.49	2.85478	154.507	20.3165	233.761	33.5164
612	Brd2	2292.33	1.11334	0.0666461	16.7052	1.20083e-62	3.72492e-61	1574.73	2999.67	1466.76	3375.23	1257.12	2822.83	3405.83	1427.87	3431.8	1577.82	2953.8	1249.19	1456.79	3355.99	1491.47	2962.66	1516.56	2654.81	1488.64	3377.02
613	Jak2	354.821	3.79929	0.227439	16.7047	1.21185e-62	3.75298e-61	43.2713	488.444	67.9001	858.744	43.4369	534.001	607.639	45.0333	982.102	18.0449	371.773	30.6458	25.7359	740.415	106.625	775.345	42.3943	674.877	57.2252	582.763
614	Riok3	1758.68	1.58687	0.0950307	16.6985	1.34434e-62	4.15651e-61	885.39	2999.1	904.54	2565.69	819.57	1803.08	2924.36	803.231	2726.07	769.229	2626.59	1079.23	737.583	2654.83	873.775	2720.03	1002.4	3130.07	900.095	2248.72
615	Osgin2	900.88	2.3161	0.138949	16.6687	2.21461e-62	6.83613e-61	189.115	1528.33	281.968	1753.6	288.899	1073.23	1360.59	240.392	1473.85	415.043	1521.48	277.018	212.343	1481.66	321.765	1448.52	460.463	1790.71	323.545	1575.08
616	Fbxw4	119.259	-3.06791	0.184356	-16.6413	3.50192e-62	1.07923e-60	248.089	15.3742	189.214	18.9908	128.478	28.1516	17.9172	241.83	23.409	221.955	20.1305	179.79	290.991	31.0636	222.307	29.615	180.801	23.4815	226.33	47.2624
617	Zcchc2	435.755	2.37712	0.143017	16.6212	4.8921e-62	1.50521e-60	103.35	667.734	193.265	718.953	121.982	612.815	662.786	187.102	952.418	147.28	890.427	97.2437	91.8632	847.13	181.696	619.599	143.374	712.376	141.624	622.078
618	Prkcd	9021.3	1.72896	0.10408	16.6118	5.72019e-62	1.75715e-60	4858.44	15915.4	4448.13	13207	2912.12	11320	13666.3	4727.53	15113.5	4149.64	13953.4	2864.93	4993.33	15794.9	4278.25	13370.3	4431.86	11911.6	4155.65	14353.7
619	Mmadhc	1006.72	1.23614	0.0744245	16.6093	5.96613e-62	1.82974e-60	512.018	1169.56	641.831	1465.06	546.83	1188.36	1526.59	563.406	1373.22	695.305	1341.83	622.588	572.268	1422.42	572.706	1620.21	658.301	1471.37	622.82	1547.8
620	Sec23ip	767.772	0.9313	0.0560929	16.6028	6.65035e-62	2.0363e-60	535.234	1075.51	536.941	937.451	473.799	1019.57	1129.88	525.675	940.765	572.28	956.474	526.466	557.579	1073.03	524.028	1045.13	543.037	952.049	486.753	943.796
621	Htra2	522.197	-1.61601	0.097379	-16.595	7.57278e-62	2.315e-60	804.067	249.079	745.459	196.348	799.428	255.851	274.686	802.162	280.132	893.995	340.822	902.758	799.18	220.552	683.978	227.257	792.499	314.131	645.231	216.332
622	Arhgap25	1127.64	-2.16671	0.130627	-16.5869	8.66363e-62	2.64422e-60	2433.27	433.156	2080.82	376.664	1183.84	358.983	432.854	1994.89	446.251	1795.39	394.478	1227.39	2367.59	482.295	1527.9	385.283	1751.5	326.5	2079.34	474.45
623	Ppp1r11	726.307	1.79158	0.108046	16.5816	9.47006e-62	2.88571e-60	348.63	1212.62	310.646	1207.91	306.165	1057.53	979.305	268.101	1156.88	383.013	744.991	280.099	423.856	1405.49	329.05	1311.7	318.649	965.403	299.998	1216.09
624	Msh2	125.945	-3.79236	0.228759	-16.5779	1.0062e-61	3.06116e-60	208.839	28.7175	211.737	18.2199	189.82	35.9559	26.7618	205.455	9.50982	300.267	25.7387	259.196	252.892	4.19666	197.751	18.9199	273.339	13.392	225.04	13.1598
625	Arrb1	662.055	-2.65129	0.160062	-16.5642	1.26518e-61	3.84292e-60	1182.98	131.667	1171.54	148.547	1105.33	204.554	145.077	1176.69	246.937	1085.77	187.455	1028.31	1376.45	126.705	1111.92	162.631	1110.22	347.318	1090.05	100.961
626	Rassf4	9872.33	2.14937	0.129986	16.5354	2.04163e-61	6.19142e-60	5071.8	17948.8	3689.3	15730.6	2429.54	11559.2	15997.5	4640.98	16742	3017.82	17781.8	2830.07	5062.47	15450.8	3492.27	15552	2927.03	17951	3163.1	16408.5
627	Tmed5	1782.04	1.52613	0.0923603	16.5237	2.47768e-61	7.5018e-60	845.841	2401.07	954.774	2572.45	1036.17	2905.02	2745.76	763.556	2615.68	728.594	2380.15	1056.55	795.942	2811.9	973.487	2425.11	933.557	2198.4	1086.22	3410.53
628	Mina	1063.38	2.03744	0.123402	16.5106	3.07911e-61	9.30794e-60	368.901	1685	325.483	1540.54	448.874	2158.02	1645.13	338.145	1610.6	442.063	1708.01	718.091	338.534	1746.84	399.291	1767.42	406.251	1660.68	369.157	1590.6
629	Gm28049	254.012	2.32987	0.14115	16.5064	3.30164e-61	9.96475e-60	85.8509	312.239	65.2485	352.756	86.522	399.164	499.735	87.0743	464.332	130.624	349.469	105.915	52.8369	404.994	87.886	506.938	81.74	499.142	60.1746	447.596
630	Lztfl1	842.129	2.84833	0.172761	16.4872	4.53845e-61	1.36759e-59	262.83	1922.42	151.765	1513.47	131.095	1984.77	1679.55	276.145	1266.17	134.464	893.857	169.578	266.45	1479.46	152.944	1270.44	193.051	1360.68	323.077	1410.35
631	Mblac2	73.7957	-3.94443	0.239371	-16.4783	5.2574e-61	1.58172e-59	159.585	8.67858	146.438	2.97128	125.073	9.37568	8.8714	131.491	4.65235	140.779	30.1731	96.8463	172.591	12.7274	144.607	13.5251	114.777	7.76611	142.272	2.71243
632	Irf5	3382.19	1.33576	0.0810628	16.4781	5.26867e-61	1.5826e-59	2235.64	4892.55	1895.66	5577.08	1462.64	4075.26	4671.9	1808.8	4691.7	2122.35	4678.31	1866.88	1949.22	5001	1953.12	4414.89	1964.12	4396.7	1935.11	6050.89
633	Ifit1	9985.92	6.94793	0.422216	16.4559	7.61371e-61	2.28339e-59	83.9361	17527	69.3008	24856.3	167.026	21866.3	23335.9	68.3391	17422.5	60.5961	13643.4	167.36	112.355	19952.9	760.249	16405.6	55.8391	19792.3	63.3058	23308
634	Nr3c1	925.273	1.67116	0.101777	16.4199	1.37842e-60	4.12744e-59	532.971	1470.6	362.695	1634.27	353.96	1568.71	1687.42	525.781	1475.88	511.116	1133.24	394.522	440.941	1466.8	424.642	1207.33	479.886	1154.06	401.485	1279.15
635	Slc17a5	629.53	-1.9982	0.121711	-16.4175	1.43276e-60	4.2834e-59	1266.92	259.005	1192.08	232.598	754.135	258.632	229.769	1178.52	256.834	701.2	251.009	814.602	1233.24	211.312	932.816	232.776	904.134	297.764	1089.17	294.084
636	Psmd11	2188.69	1.51153	0.0920814	16.4151	1.49138e-60	4.45161e-59	1040.26	3520.07	1037.96	2963.87	1024.25	2027.27	3569.45	1030.04	3571.4	1158.92	3371.13	1310.23	1130.57	3253.66	1231.72	3435.14	1217.05	3609.57	1183.6	3087.59
637	Irgm1	5590.12	3.66294	0.223199	16.4111	1.59357e-60	4.7492e-59	600.513	9884.47	597.603	13562.6	722.148	8849.29	11809.4	605.125	10103	505.493	7941.36	722.528	790.909	10378.1	2444.43	9640.81	550.001	9387.69	650.292	12056.7
638	Hsp90ab1	13913.6	1.19322	0.0727244	16.4074	1.69249e-60	5.03609e-59	7968.73	21613.8	7538.46	17480.8	7979.55	16701.6	20201.2	7591.99	20621	9239.25	19356.4	10133.8	8578.7	20327.3	8329.31	22422.3	8524.49	16271.7	8775.08	18616.2
639	Psma2	2737.44	1.34831	0.0822086	16.4011	1.87698e-60	5.5763e-59	1353.66	4129.85	1422.18	4440.4	1548.3	3302.65	4202.11	1273.71	4005.2	1461.04	3214.05	1873.36	1463.7	4095.64	1809.42	4323.53	1559.55	3819.39	1679.18	3771.88
640	Gcnt2	87.599	2.61692	0.159605	16.3963	2.03286e-60	6.02997e-59	19.2197	178.615	18.6035	164.22	22.3788	186.864	122.23	21.33	117.582	31.9781	118.881	22.5653	14.0076	131.822	28.7936	168.622	33.8234	135.311	31.4776	183.657
641	Tmem171	1254.46	3.2167	0.196236	16.392	2.18196e-60	6.46214e-59	163.815	2148.97	168.092	2788.68	399.665	2687.2	2369.12	131.809	2274.1	252.516	1645.18	456.73	147.133	2410.39	261.192	2356.22	248.548	1497.52	200.524	2481.88
642	Msr1	4799.69	1.56833	0.0961163	16.317	7.46685e-60	2.20795e-58	2177.67	8419.45	2292.63	6661.33	2026.58	6443.53	8454.13	2197.69	7167.14	2483	5924.62	2463.59	2032.76	8933.01	2897.45	7044.52	2900.6	6037.6	2734.9	6701.62
643	Ccdc71l	226.551	2.30423	0.141253	16.3129	7.99689e-60	2.36101e-58	66.6647	368.719	78.3415	482.837	61.9882	317.715	350.464	68.6467	455.884	43.4501	422.053	81.5408	80.5563	381.843	128.918	326.603	84.6946	360.097	71.6522	298.345
644	Cggbp1	911.348	1.69556	0.103978	16.3069	8.80899e-60	2.59674e-58	421.013	947.867	403.181	1803.7	359.153	1311.87	1411.67	439.46	1206.18	443.952	1215.71	423.383	380.14	1705.69	418.996	1305.8	475.765	1406.37	540.367	1606.7
645	E2f1	328.98	-1.64407	0.100861	-16.3004	9.80913e-60	2.88708e-58	583.197	134.747	473.831	132.146	439.957	166.329	131.56	518.884	155.878	517.157	246.499	411.25	570.785	138.602	468.528	165.612	458.979	165.118	526.954	173.594
646	Rbm43	684.11	1.51866	0.0932365	16.2882	1.19682e-59	3.51167e-58	326.508	821.959	327.706	1250.31	298.065	926.766	1233.47	356.022	1002.98	373.986	901.771	325.674	417.354	1018.45	382.388	884.737	399.551	893.21	342.479	1198.8
647	Zfp207	2782.07	1.01287	0.0621841	16.2883	1.19601e-59	3.51167e-58	1773.51	3602.14	1887.68	4259.04	1707.56	3190.73	3925.26	1648.8	3522.91	1761.33	3425.56	1943.02	1777.19	3651.13	1811.48	3745.4	2063.54	4013.48	2065.84	3865.82
648	Ncoa7	346.855	2.11789	0.130194	16.2671	1.68843e-59	4.94647e-58	126.07	539.367	124.299	636.443	132.201	679.463	516.608	118.556	569.901	101.049	644.424	113.665	118.007	558.887	239.654	581.08	111.527	494.787	126.507	404.604
649	Snx5	2623.15	-1.36895	0.0841618	-16.2656	1.73053e-59	5.06199e-58	4131.04	1706.8	4430.65	1437.18	3420.12	1759.17	1354.56	4134.38	1439.33	2726.85	1448.12	3599.75	4168.81	1318.25	3750.13	1385.27	3544.18	1416.54	3895.21	1396.61
650	Zbtb14	117.208	-2.04515	0.125766	-16.2615	1.84998e-59	5.40309e-58	198.033	63.3824	229.03	31.4457	180.248	47.5355	49.2389	167.897	40.8559	175.576	24.2676	176.552	172.297	42.8765	173.557	56.4699	210.14	54.7695	202.559	47.4223
651	Fgl2	304.658	4.2817	0.263342	16.2591	1.92518e-59	5.61408e-58	22.7921	646.697	31.3365	661.107	56.4457	1364.02	696.347	29.7133	360.194	13.23	332.1	28.448	25.5661	561.256	40.9771	377.724	27.9401	246.6	20.0256	550.652
652	Zhx2	174.48	2.99675	0.184403	16.2511	2.19305e-59	6.38542e-58	46.1267	414.089	44.5609	381.019	35.7465	207.65	475.425	37.8182	346.505	27.4045	225.654	44.9219	38.3018	275.211	67.3036	272.571	32.1942	221.659	18.738	276.705
653	Mndal	2642.96	4.04437	0.248876	16.2505	2.21498e-59	6.43939e-58	248.434	4672.7	279.293	5944.95	305.494	6681.39	6610.48	241.992	4844.68	129.665	3191.4	213.252	289.26	4904.35	929.347	4736.8	177.239	3765.07	213.227	4480.26
654	Il15ra	319.58	3.09942	0.190758	16.248	2.30958e-59	6.70413e-58	62.1348	409.009	83.9873	759.859	64.229	717.254	936.09	86.7493	491.654	49.4334	363.758	32.4078	67.3006	581.906	85.3005	385.386	70.1626	443.8	71.09	630.087
655	Zc3hav1	3787.97	1.47184	0.090632	16.2398	2.63828e-59	7.64658e-58	2135.92	5572.81	2120.72	6879.08	1677.86	4565.86	6309.45	1935.64	5512.11	1649.44	4640.11	1863.22	2184.55	4881.33	2441.49	5104.59	2041	5756.03	2033.43	6454.69
656	Slc31a2	6143.45	1.81854	0.112021	16.2339	2.90179e-59	8.39749e-58	3776.86	10604.3	2474.46	9589.05	2248.17	7044.66	10262.9	2760.96	9966.5	2107.6	9779.07	2752.91	3610.82	10712	2891.59	9327.1	2229.38	8290.69	2290.04	10150
657	Abcc1	4914.26	2.23524	0.137728	16.2294	3.1252e-59	9.03025e-58	1668.85	10441.5	1249.85	6664.62	1442.29	4551.91	8249.83	1502.73	8899.51	2232.38	9670.22	2319.76	1575.9	7762.65	1427.61	8115.08	2134.49	9123.51	1654.89	7597.57
658	Als2cl	188.962	-2.47275	0.152504	-16.2143	3.99521e-59	1.15266e-57	386.936	47.9569	356.347	61.1929	190.775	51.4939	39.409	285.242	59.4629	342.063	54.6579	234.649	365.036	56.3747	321.122	78.1311	370.968	65.4599	354.737	57.2215
659	Phka2	699.315	-1.87921	0.115922	-16.2109	4.22051e-59	1.21581e-57	1067.11	231.915	1127.73	258.462	842.074	315.886	428.125	1199.32	243.131	1112.59	315.895	1135.11	1009.33	294.84	987.653	214.497	1302.65	314.309	1201.38	384.295
660	Dnajc1	683.346	2.14184	0.132267	16.1933	5.621e-59	1.6168e-57	317.887	989.896	209.699	1108.33	213.449	874.733	1615.22	223.287	1215.23	296.579	1004.7	307.81	250.735	1092.19	211.433	786.914	224.175	937.977	270.446	1516.24
661	Kctd12	1296.93	2.78393	0.171963	16.1891	6.01625e-59	1.72787e-57	271.357	2290.83	333.131	1945.54	213.631	2194.95	1456.77	460.315	3197.05	285.779	2454.81	169.691	296.75	2711.97	421.225	2371.38	501.316	2265.07	337.906	1759.04
662	Kdm6b	210.517	4.2189	0.260964	16.1666	8.67189e-59	2.48682e-57	25.1571	417.514	19.2372	419.229	34.6697	425.31	369.981	12.7239	529.129	28.0028	276.212	17.9665	7.3272	608.915	35.5528	466.605	31.8953	173.729	5.16729	306.025
663	Prune2	309.084	-1.83088	0.113507	-16.1301	1.56878e-58	4.49197e-57	506.019	129.764	380.863	129.259	518.414	148.616	81.4199	391.852	128.588	531.46	160.804	534.484	426.436	137.53	591.832	148.419	490.557	146.361	447.228	151.781
664	Ywhag	5260.59	1.25161	0.0776297	16.1229	1.76224e-58	5.0383e-57	3392.33	8332.45	3090.6	7756.57	3123.26	6073.38	7287.05	2657.25	8180.11	3275.17	7117	2974.71	2848.12	8578.36	3009.37	7164.65	3779.01	6149.93	2960.02	7462.39
665	Serpinb2	1278.14	7.34422	0.455549	16.1217	1.79678e-58	5.12933e-57	11.8613	2925.24	14.2234	1355.09	17.4487	4814.71	2655.44	56.9517	3211.64	1.73532	1817.07	7.62228	24.6181	3853.72	3.31487	2199.66	8.94213	860.798	7.5104	1715.17
666	Arrdc4	414.049	2.46012	0.152609	16.1204	1.83388e-58	5.22737e-57	151.558	558.456	143.266	647.026	106.504	600.022	450.281	168.354	783.21	124.065	924.956	72.8744	180.454	798.788	104.272	808.177	113.35	745.18	112.979	687.213
667	Rfc2	374.392	-1.89125	0.117363	-16.1146	2.01604e-58	5.73802e-57	515.296	56.354	572.497	199.08	532.525	177.282	159.747	504.066	163.557	759	146.698	599.233	617.819	140.025	537.155	156.98	673.403	186.297	617.278	173.555
668	Slc46a1	182.001	-2.08049	0.129197	-16.1032	2.42056e-58	6.87903e-57	338.749	47.003	265.154	76.4517	230.158	77.0701	71.9428	272.11	54.0607	357.722	70.9622	244.69	352.234	61.7384	344.67	74.1731	251.53	75.6655	289.227	84.7038
669	Kdm4a	433.728	2.76285	0.171656	16.0953	2.753e-58	7.81211e-57	127.818	878.664	78.5384	786.114	129.879	412.485	795.906	126.15	774.498	151.95	858.081	67.6907	134.253	835.625	116.55	879.188	95.3889	409.734	89.3961	926.659
670	Cdk2	319.198	-2.08712	0.129721	-16.0894	3.02817e-58	8.58013e-57	408.862	101.781	467.991	117.247	538.175	95.8536	102.905	389.704	122.792	664.554	123.649	664.88	489.588	145.774	415.11	136.075	639.51	142.561	496.406	120.543
671	Dhx58	2802	3.59476	0.22349	16.0847	3.2673e-58	9.24389e-57	338.167	5406.96	314.671	5708.13	360.409	5029.7	5338.98	288.424	4929.51	264.297	4818.3	476.75	334.679	5225.45	1276.79	4423.07	271.328	4204.13	364.805	6665.55
672	Cxcl11	71.7048	5.86622	0.364947	16.0742	3.87208e-58	1.09386e-56	1.13374	85.4221	2.35992	155.521	2.82612	385.855	156.657	3.84444	99.8155	1.24216	95.0899	2.58572	0	92.4371	3.16105	98.014	2.7983	103.388	2.76229	139.182
673	Hspa1a	252.487	4.66385	0.290374	16.0615	4.74657e-58	1.33891e-56	31.5056	486.822	9.64191	240.665	19.3614	998.62	577.746	16.0963	543.055	14.1924	473.599	14.0048	24.269	781.231	24.1239	428.143	15.4672	145.732	26.3674	179.091
674	Kif23	139.204	-4.70138	0.29276	-16.0589	4.95636e-58	1.39602e-56	128.039	0	281.13	8.92346	230.427	18.7302	14.7972	221.51	3.88219	335.066	0	325.508	214.923	12.7395	271.56	4.1687	349.782	23.333	331.404	8.14778
675	Adhfe1	340.158	2.38337	0.148434	16.0567	5.1287e-58	1.44242e-56	101.405	784.551	97.4071	585.905	68.4504	280.566	556.91	108.236	570.624	144.581	508.638	118.559	138.525	659.504	97.2585	631.158	116.437	602.477	103.857	528.117
676	Vnn3	63.3665	5.36677	0.33463	16.0379	6.9426e-58	1.94968e-56	6.09286	200.9	1.80777	77.2402	6.0775	63.1812	179.936	3.42943	151.11	1.89988	107.465	1.44697	5.09636	175.437	3.62814	94.0891	1.28695	72.0568	1.05701	114.091
677	Tbrg1	1291.45	1.52509	0.0951553	16.0274	8.22568e-58	2.30659e-56	620.205	1369.91	661.561	1817.79	639.468	2403.11	1572.5	556.546	1814.68	736.045	2145.53	812.638	613.675	1954.02	682.482	1887.83	698.342	1917.91	638.236	2286.44
678	Slc26a11	339.113	-4.24355	0.264786	-16.0263	8.37268e-58	2.34435e-56	1047.77	37.5397	841.02	37.0383	383.108	33.1779	31.0935	802.332	23.0258	405.19	43.6816	270.764	1099.78	73.3219	581.284	25.6945	411.427	23.299	593.694	18.0117
679	Ly9	3582.67	1.96627	0.12271	16.0236	8.73955e-58	2.44347e-56	1571.54	6462.1	1512.32	5922.67	970.173	3109.92	4968.37	1541.13	6386.14	1271.65	5817.46	1471.73	1657.69	6384.19	1874.78	6117.77	1351.69	5846.8	1380.78	6034.41
680	Zswim4	331.506	2.38179	0.148757	16.0113	1.06616e-57	2.97648e-56	114.958	529.021	84.9705	704.204	75.2785	535.435	448.126	98.3107	700.027	129.365	466.803	170.132	120.219	537.16	79.5028	411.777	96.744	544.415	94.8172	688.845
681	Gyk	1381.7	1.66774	0.104227	16.0011	1.25476e-57	3.49784e-56	625.178	2246.97	543.875	2061.67	591.095	2907.92	1788.66	649.253	2200.55	670.615	1873.41	804.751	565.899	2495.91	737.209	1866.7	787.183	1839.18	637.101	1740.92
682	Ms4a4d	58.9979	4.72941	0.295716	15.993	1.42875e-57	3.97705e-56	5.2044	161.968	3.01167	112.837	11.5898	99.2803	131.076	1.47286	125.913	0.951717	123.678	3.98902	0	118.126	9.68571	95.29	1.28531	86.7397	6.34749	81.5118
683	Supt6	1084.67	1.13162	0.0708025	15.9827	1.6859e-57	4.68598e-56	785.93	1598.18	688.839	1434.24	619.349	1308.08	1506.47	643.174	1593.22	711.779	1548.08	694.108	706.993	1695.58	552.881	1460.75	721.849	1258.78	663.21	1501.99
684	Glul	490.42	-2.85679	0.178826	-15.9752	1.90236e-57	5.27989e-56	1137.96	75.4036	778.027	68.0416	475.722	96.446	86.4569	1013.55	132.45	826.33	171.776	992.558	1025.32	112.235	625.499	147.574	849.346	188.279	896.217	109.211
685	Gca	249.099	3.37629	0.211637	15.9532	2.70511e-57	7.4969e-56	37.6035	365.09	57.69	573.633	54.8792	480.391	630.349	60.2688	407.922	16.9759	236.118	39.9941	28.9253	495.204	51.7619	676.454	34.2157	428.04	55.9624	250.501
686	Havcr2	306.166	-2.76154	0.173211	-15.9432	3.17754e-57	8.79336e-56	579.809	56.542	494.146	40.1101	375.55	49.2466	101.93	454.864	53.1521	684.439	151.811	525.097	501.817	73.789	532.118	89.6297	611.261	88.4373	559.153	100.414
687	Wdr59	284.385	2.02653	0.127146	15.9386	3.42137e-57	9.45435e-56	86.4817	512.959	130.721	521.839	120.948	403.658	559.294	131.192	533.398	110.47	333.805	88.3198	115.829	552.255	128.224	436.513	121.52	326.988	90.1377	383.157
688	Esd	8830.57	1.7924	0.112492	15.9336	3.70498e-57	1.02232e-55	3718.58	14281.5	3794.07	12901	3069.32	8467.31	15665.2	3113.43	14720.1	4945.81	12400.3	4838.79	3649.91	13803.9	3847.98	16169.7	4605.9	15190.4	3980.57	13447.6
689	Fmnl2	176.335	2.7338	0.171653	15.9263	4.16365e-57	1.14721e-55	42.6755	354.518	32.2884	290.767	57.6304	195.167	277.519	44.2133	405.783	32.4084	357.384	35.5691	36.9119	304.986	87.1754	317.446	55.173	333.612	39.5929	225.887
690	Sptssa	1581.32	-2.16479	0.136012	-15.9161	4.89699e-57	1.34731e-55	2534.38	351.1	2944.6	567.324	2824.59	571.672	663.896	2795.79	541.516	1373.49	657.359	2371.45	2152.66	552.51	2961.23	630.596	2841.71	752.472	3078.52	459.579
691	Alg10b	340.198	-1.58532	0.0996053	-15.916	4.90483e-57	1.34752e-55	503.534	177.568	518.864	144.113	486.139	149.453	179.038	455.995	152.661	436.748	183.859	567.351	459.429	156.598	479.098	191.155	651.662	214.341	539.096	157.25
692	Isg15	5764.39	6.62678	0.417377	15.8772	9.11381e-57	2.50024e-55	61.8747	10099.7	47.1065	15396.4	121.193	10239.8	12395	46.8364	11316.5	60.2761	9005.64	65.4783	73.2018	12392.9	561.303	12842.5	43.884	6731.56	78.6428	13708.2
693	Mocs1	920.285	2.16367	0.136317	15.8724	9.84288e-57	2.69635e-55	445.735	1536.88	330.157	1286.48	200.212	1048.35	1679.77	369.088	1588.67	262.435	2004.35	256.896	446.635	1527.74	367.79	1291.97	330.592	1483.9	351.861	1596.19
694	Eif4a1	13402	1.0352	0.0652501	15.8651	1.10491e-56	3.02242e-55	8142.16	18472.1	8313.11	18434.2	9647.26	17024.2	18620.1	7304.99	17770.6	9475.13	16364.7	9457.49	8666.88	20574.8	8780.28	18862.5	9658.81	15184.1	8449.97	18835.6
695	Ccnf	283.453	-3.59881	0.227105	-15.8464	1.48814e-56	4.06487e-55	235.049	47.7222	441.725	20.7991	505.299	29.4831	41.4032	421.177	32.5643	856.807	30.1562	694.349	370.792	48.3657	392.804	49.9309	681.401	66.0053	635.421	67.8075
696	Bco2	104.629	3.86545	0.244113	15.8347	1.79368e-56	4.89241e-55	13.9561	274.636	13.2573	203.509	6.08045	239.435	191.874	12.7161	187.132	20.8663	137.473	8.0788	12.7535	264.516	24.1628	172.257	5.1509	114.801	24.2906	165.634
697	Slc45a4	90.5273	-3.05689	0.193176	-15.8244	2.11359e-56	5.75673e-55	171.21	30.3887	159.684	22.6849	91.6875	19.0234	29.5769	181.07	18.6513	194.739	21.6218	151.12	174.433	21.0748	150.692	8.93895	172.129	24.0925	162.55	5.17773
698	Rhod	78.3936	-3.67144	0.232022	-15.8237	2.13655e-56	5.81091e-55	122.211	12.5004	135.349	2.82585	138.826	25.0088	7.6971	135.784	16.6764	169.065	0	110.432	150.104	7.25242	179.98	6.9768	177.432	9.27589	139.788	20.6869
699	Mbp	361.494	-2.13792	0.135218	-15.811	2.61373e-56	7.09857e-55	694.626	92.0101	527.816	174.068	455.085	140.652	100.038	651.03	120.318	543.905	187.89	674.238	582.97	96.4412	598.38	121.071	605.222	115.05	528.669	220.401
700	Rell1	343.152	-2.95347	0.18682	-15.8092	2.6891e-56	7.29283e-55	699.366	82.8275	752.666	78.5534	445.715	75.6884	80.5887	691.275	73.3899	487.782	47.0528	249.56	758.446	115.348	701.957	104.653	610.518	60.243	687.616	59.8026
701	Nlrc3	221.933	-2.32633	0.147176	-15.8065	2.80789e-56	7.60415e-55	435.663	65.1269	312.124	83.8058	208.74	96.8006	74.3323	349.594	71.1423	419.545	44.7593	315.109	470.499	71.3018	426.325	62.0726	387.443	80.647	387.64	75.9833
702	Zfand5	1654.24	2.07793	0.13147	15.8053	2.86049e-56	7.73554e-55	809.041	2255.66	450.416	1669.75	640.326	3637.78	2414.63	785.058	2449.75	474.337	2983.37	625.622	584.916	2987.4	680.02	2306.81	703.824	2827.16	577.911	3220.99
703	Lrrk1	190.35	-2.16244	0.136993	-15.7851	3.94119e-56	1.06429e-54	421.775	69.5752	312.336	54.1626	252.87	101.938	55.6239	286.925	55.6907	305.922	102.453	280.907	323.082	71.7827	290.149	78.8749	344.957	76.474	280.121	41.3856
704	Echs1	416.015	-1.44282	0.0914281	-15.7809	4.21126e-56	1.1356e-54	749.821	174.893	682.305	214.906	516.841	218.151	231.915	626.543	220.133	590.057	176.182	523.965	694.714	231.39	553.155	245.267	569.604	257.078	604.169	239.221
705	Zc3h12d	207.466	-2.75242	0.17449	-15.7741	4.69079e-56	1.26312e-54	350.801	21.6929	338.676	47.5407	438.327	91.1181	78.3689	282.42	48.8472	278.686	45.24	524.705	409.14	57.2748	379.56	53.0535	303.509	34.9448	319.298	46.1096
706	Psmd7	1676.97	1.39129	0.0882212	15.7705	4.96439e-56	1.3349e-54	840.66	2643.11	808.65	2465.59	887.406	1914.27	2517.16	708.732	2475.54	1008.59	2253.51	1164.45	856.559	2713.21	941.919	2606.97	1070.47	2398.6	964.866	2299.14
707	Rrbp1	2066.42	1.6837	0.10683	15.7605	5.81751e-56	1.56209e-54	1040.29	2852.19	969.653	3405.64	642.918	2854.78	3271.63	835.014	3762.03	1091.62	2339.87	1114.07	1125.45	3384.94	1045.39	2883.08	1072.32	2904.69	883.549	3849.36
708	Cx3cl1	605.369	5.98478	0.379769	15.759	5.95964e-56	1.59799e-54	16.4502	1172.32	10.6857	1342.57	38.2893	1612.04	641.995	12.1029	1007.78	46.8338	1160.48	39.6894	2.01097	1353.17	13.2826	955.6	7.10136	1163.81	5.80754	1505.37
709	Fam26f	751.335	5.33513	0.338632	15.755	6.3485e-56	1.69986e-54	57.6603	1010.08	38.5579	2635.6	21.49	1112.89	2282.97	35.5977	1348.76	13.4093	678.421	14.5647	87.4433	1540.47	38.91	966.81	18.8129	793.354	41.4089	2289.5
710	Dock2	2497.85	-1.22103	0.0775521	-15.7447	7.46967e-56	1.99724e-54	3890.32	1717.18	3387.9	1507.65	3002.37	1814.83	1582.99	3387.24	1317.58	3382.71	1310.22	3669.8	3650.68	1328.69	3576.42	1204.42	3479.76	1525.84	3511.76	1708.69
711	Cep19	80.2223	-2.68781	0.170753	-15.7409	7.93201e-56	2.11788e-54	152.286	4.32372	121.783	32.6716	139.352	22.0943	37.9255	137.253	12.6845	142.93	26.6306	124.298	136.075	23.8925	159.192	22.7654	140.618	21.5313	138.077	8.06337
712	Kctd10	2111.89	1.44264	0.0917127	15.73	9.42643e-56	2.51336e-54	1197.94	2830.64	1136.26	3417.82	813.733	2606.86	3194.48	1174.06	2909.21	1410.14	3112.49	998.149	1214.34	3500.55	1129.37	2615.05	1232.72	3006.19	1056.59	3681.24
713	Cndp2	12005.2	0.987109	0.0627583	15.7287	9.6109e-56	2.55895e-54	8525.91	15217.8	7880.85	15997.3	7346.99	14779.1	16398.2	6995.64	16248.5	8615.37	15657.7	8078.64	9196.64	17785.4	7725.72	15180.4	8071.45	13768	8081.44	18553.9
714	F10	106.33	3.92369	0.249531	15.7243	1.03135e-55	2.74217e-54	10.3261	173.136	12.2075	148.312	20.0709	121.721	426.139	15.856	295.039	8.7945	130.082	12.8656	20.4501	197.163	9.16963	189.378	7.97489	113.577	15.1431	199.185
715	Psma4	1880.81	1.07639	0.0684731	15.7198	1.1061e-55	2.93682e-54	1046.56	2344.96	1151.89	2663.36	1172.04	2416.42	2661.86	1099.54	2608.88	1265.24	2085.02	1334.27	1261.78	2795.3	1382.26	2911.18	1283.95	2530.15	1125.24	2476.33
716	Pik3r2	291.751	-2.90147	0.1848	-15.7006	1.49793e-55	3.97161e-54	635.62	23.6828	521.604	44.5381	377.837	36.7096	71.158	516.564	61.4228	558.473	160.096	445.595	705.532	57.0644	442.439	72.8473	450.236	89.1274	465.869	98.5967
717	Tes	1635.56	1.45326	0.0925946	15.6948	1.64046e-55	4.34344e-54	743.376	2448.87	774.189	2163.33	698.672	2070.85	2366.27	771.374	2691.43	1009.34	2505.32	986.393	764.593	2688.33	972.087	2477.2	1140.67	2184.4	886.56	2367.89
718	Ak3	671.254	-1.41836	0.0903833	-15.6927	1.6969e-55	4.48663e-54	1022.75	269.118	1003.51	318.83	693.494	364.281	367.217	1053.21	390.352	1087.37	367.249	879.005	1083.57	391.166	970.678	339.095	1018.16	412.251	979.304	414.466
719	H3f3a	7356.72	0.99271	0.0632701	15.69	1.76948e-55	4.67202e-54	5092.5	10246.9	5458.53	10898.7	4700.32	9400.59	9758.63	4744.19	10354.5	4474.08	8026.96	5388.95	5118.08	10499.9	4710.04	10427.2	4377.92	8902.05	5157.5	9396.84
720	Tnrc6b	256.449	-2.36132	0.150593	-15.6802	2.06681e-55	5.44948e-54	526.491	116.743	430.279	89.1446	302.992	123.076	68.1065	509.177	69.3207	389.045	63.5085	358.13	540.518	57.308	358.39	90.2706	399.378	99.8173	477.659	59.623
721	Wsb1	2944.69	1.12415	0.0717857	15.6598	2.84712e-55	7.49648e-54	2111.2	4705.26	1749.77	4386.8	1716.67	3665	3755.75	1902.7	4129.95	1517.44	3602.19	1817.4	1859.01	4450.01	2197	3943.33	1924.06	3887.62	1725.54	3847.06
722	Ankrd46	181.835	-2.07265	0.132361	-15.659	2.88267e-55	7.57958e-54	293.619	113.159	289.254	51.9937	238.343	57.1308	76.7975	243.198	55.4911	263.318	95.0505	284.477	359.957	63.6038	304.179	64.6487	309.216	91.3814	330.317	51.5719
723	Ociad1	2288.42	0.844487	0.0539686	15.6477	3.4425e-55	9.03907e-54	1550.44	3022.44	1583.18	3082.57	1627.47	2889.93	3101.37	1478.64	2934.69	1688.05	2462.74	1828.14	1689.17	2992.8	1732.9	2970.52	1589.96	2724.8	1610.5	3208.1
724	Rgs10	711.377	-1.92132	0.122821	-15.6433	3.69247e-55	9.68202e-54	1359.11	312.503	1239.89	290.999	1163	405.728	250.769	1173.71	265.501	996.395	166.742	1199.39	1241.42	324.931	1058.18	249.243	877.121	290.618	952.064	410.226
725	Pla1a	43.0108	6.03171	0.385782	15.635	4.20227e-55	1.10036e-53	3.48708	148.383	0.602803	74.2972	3.8699	62.0639	81.1802	0.979204	69.9236	0	76.5633	0.967745	0	100.485	0	62.6973	0	57.4413	3.17057	114.102
726	Msrb2	147.912	-2.77785	0.177721	-15.6304	4.51789e-55	1.18137e-53	223.711	59.3455	201.503	36.6014	220.693	39.2504	31.5786	270.594	33.0941	313.793	24.5424	213.841	346.303	27.2623	294.257	40.4502	265.705	26.2307	205.941	83.5389
727	Pilra	3652.09	3.5289	0.22581	15.6277	4.71253e-55	1.23057e-53	272.785	6920.56	268.312	5350.33	627.338	5741.26	7900.53	385.195	6992	1141.51	7586.64	990.782	338.846	6848.03	545.001	7027.7	885.351	6609.61	363.254	6246.77
728	Lap3	777.417	1.2241	0.0785458	15.5845	9.27528e-55	2.41871e-53	461.956	1014.93	410.544	1099.84	387.34	968.079	1001.58	423.357	1098.4	488.188	1164.66	547.374	435.28	1226.82	508.623	1179.36	514.553	942.151	479.035	1196.26
729	Abtb2	168.179	4.16918	0.267599	15.58	9.96166e-55	2.59413e-53	2.70258	333.987	14.4809	418.662	22.5606	354.706	269.403	10.1611	331.6	35.2703	225.103	15.3423	9.55742	386.749	14.6291	233.37	38.5129	222.899	10.826	413.064
730	Armc7	512.207	1.75316	0.112536	15.5786	1.0176e-54	2.64633e-53	239.611	737.166	208.374	742.827	222.29	789.337	642.649	230.583	858.415	286.478	811.511	203.803	292.18	925.462	277.995	661.651	222.889	668.795	164.489	1057.64
731	Trim30b	142.306	4.0812	0.262071	15.5729	1.11246e-54	2.88905e-53	8.95528	222.226	31.0812	385.464	17.5544	368.455	410.67	14.3052	191.797	6.6389	166.093	15.9956	16.0768	221.128	33.746	200.918	9.85124	178.021	7.26629	339.877
732	H2-Ab1	145.176	3.9411	0.253094	15.5717	1.13414e-54	2.94134e-53	16.4458	247.222	28.6956	248.957	5.71206	157.83	307.503	21.4607	365.8	27.3048	365.442	4.74775	24.1784	269.679	24.1597	278.033	14.6752	252.458	15.1522	228.065
733	Slc2a8	280.554	-2.26696	0.145664	-15.5629	1.29993e-54	3.3667e-53	575.137	89.3717	449.254	107.309	383.745	78.7782	80.6851	441.328	87.1719	528.305	72.6762	299.211	684.845	119.459	424.758	105.128	391.941	92.127	472.608	127.235
734	Snx14	272.884	-1.51618	0.0974997	-15.5506	1.57631e-54	4.07693e-53	448.461	128.807	395.925	109.251	322.057	138.276	145.893	391.647	163.944	399.312	172.171	365.044	429.251	143.806	418.88	122.307	407.396	156.639	474.497	124.122
735	Gm4070	3510.17	3.47371	0.223548	15.539	1.88967e-54	4.88076e-53	520.725	5480.04	433.463	7917.98	508.835	7862.8	7890.95	284.966	5885.72	599.179	4533.01	593.158	234.781	5893.94	1482.42	5494.06	591.579	6123.19	552.534	7320.11
736	Cnpy4	158.948	-2.21118	0.142391	-15.5289	2.20975e-54	5.69972e-53	208.375	69.9746	234.085	42.9189	205.353	76.1276	36.9374	256.114	55.6443	300.2	73.1255	316.299	260.768	42.8566	257.107	57.3791	290.93	75.0157	277.885	41.8577
737	Atad2	391.916	-3.09652	0.19951	-15.5206	2.51619e-54	6.48132e-53	544.546	90.9921	652.045	51.999	786.7	73.9589	84.3252	552.975	49.9902	772.866	120.222	1042.27	423.492	48.3761	611.672	89.3755	983.155	143.573	637.157	78.6336
738	Psen1	2073.25	1.13166	0.0729492	15.513	2.83167e-54	7.28408e-53	1309.63	3086.18	1229.82	2764.33	976.261	2568.09	2944.15	1225.36	2738.92	1359.29	2626.83	1366.23	1499.44	3337.77	1284.61	2667.06	1369.8	2741.29	1375.57	2994.38
739	1110008F13Rik	1422.99	1.32025	0.0851675	15.5018	3.37318e-54	8.66529e-53	848.473	2081.89	803.688	2273.84	928.128	1834.42	1852.31	750.483	2202.1	901.491	1973.78	778.683	725.959	2239.99	894.744	2207.89	786.389	1430.78	718.39	2226.37
740	Fcgr4	1518.03	2.52112	0.162668	15.4986	3.54721e-54	9.10002e-53	451.919	2536.09	451.89	3317.63	265.3	2655.55	2236.19	404.594	2483.82	400.145	2249.71	300.974	482.498	2349.1	906.564	2615.53	410.954	2099.79	439.934	3302.43
741	Stx6	1017.68	2.0065	0.129498	15.4945	3.77835e-54	9.67993e-53	391.004	1828.62	358.45	1851	310.118	1253.18	1228.69	408.555	1865.09	546.853	1413.81	289.215	499.611	2015.51	520.116	1580.39	377.775	1367.04	367.029	1881.53
742	Tgfbr2	1386.81	-1.94736	0.125705	-15.4915	3.95738e-54	1.01249e-52	2592.23	531.343	2355.08	616.762	1574.4	435.155	558.266	2411.09	659.025	2186.32	519.604	1266.72	2746.62	671.623	2266.5	529.46	2467.7	522.483	2165.94	659.799
743	Lgals9	8168.65	3.32511	0.214767	15.4824	4.55789e-54	1.16456e-52	1100.76	15396.9	1135.92	17101.7	1081.48	12041.8	15479.3	1070.15	15528.2	1232.67	12789.4	919.79	1448.01	16600.8	4296.51	16039.4	1204.34	11497.4	1342.67	16065.8
744	Zfp41	79.0385	-3.06917	0.198423	-15.4678	5.72035e-54	1.45961e-52	142.957	6.38834	97.9575	17.0153	152.417	22.6582	8.47464	122.413	16.268	158.244	17.7331	139.975	138.749	32.1541	129.302	10.9718	143.125	28.9421	186.402	8.62398
745	Kif22	223.599	-3.39016	0.219184	-15.4672	5.77813e-54	1.47238e-52	239.866	17.4375	376.024	63.8752	374.775	54.2346	48.7061	291.006	26.4004	613.667	42.0075	511.367	325.211	17.8039	343.115	42.8039	560.158	47.6718	454.132	21.7226
746	Gm19684	40.1834	4.32419	0.279636	15.4636	6.10806e-54	1.55436e-52	6.08121	69.9955	1.80772	92.0892	4.41805	72.0713	131.179	5.88813	76.1757	0.951269	34.7005	2.40085	2.5459	76.2537	7.26298	80.5992	3.85871	59.445	5.28912	70.6544
747	Rnaset2b	1420.01	2.19318	0.141877	15.4583	6.63072e-54	1.68511e-52	684.874	2516.99	489.818	2647.44	323.655	1432.5	2782.52	512.876	2503.72	614.232	2198.49	396.923	566.891	2365.41	677.277	2521.39	434.437	1762.56	401.968	2566.14
748	Aida	606.918	2.24402	0.145236	15.4508	7.44795e-54	1.89027e-52	123.952	691.914	239.23	1371.18	277.589	929.033	816.624	219.211	1171.81	195.081	795.906	181.886	149.105	1168.3	233.869	1091.25	240.311	883.777	259.01	1099.31
749	Inpp5b	1264.22	1.69916	0.110065	15.4378	9.11971e-54	2.31146e-52	580.232	2061.35	542.71	1963.74	400.619	1747.92	1769.68	579.766	1892.01	610.139	1718.7	512.97	570.703	2181.12	741.207	1835.97	866.396	1830.98	549.03	2329.19
750	Rab31	2979.98	-1.45799	0.0944458	-15.4373	9.18802e-54	2.32567e-52	4863.5	1993.12	4567.89	1446.99	3111.33	1467.88	1303.75	4382.44	1637.98	4257.97	1417	4919.28	4972.64	1934.33	3739.54	1482.29	4288.37	1597.44	4577.38	1638.57
751	Fcgr1	2553.88	3.40611	0.220652	15.4366	9.29164e-54	2.34877e-52	366.26	4068.29	309.141	6001.6	520.96	6408.52	4713.19	303.679	4275.57	292.616	3404.19	527.622	448.094	5068.18	1077.75	4186.74	237.945	2680.83	323.946	5862.55
752	Mxd1	735.068	2.70479	0.175247	15.4342	9.64495e-54	2.43484e-52	236.069	754.478	200.675	1497.55	144.47	2085.58	1511.52	220.948	1120.96	155.8	925.987	145.233	248.116	1409.1	145.752	913.996	223.159	868.526	239.146	1654.3
753	Arcn1	3101.04	1.01905	0.0660511	15.4281	1.05867e-53	2.66903e-52	1959	4536.27	1997.95	3963.48	1830.92	4410.83	4371.92	1929.52	3771.48	1942.09	4090.28	2508.59	1921.46	4464.82	1949.59	3949.02	2333.29	4251.31	2100.28	3738.78
754	Dcp2	356.065	2.11322	0.137038	15.4207	1.18839e-53	2.99209e-52	103.768	528.044	120.526	659.658	202.128	689.189	711.881	111.747	557.067	121.622	348.378	126.511	104.973	550.062	184.112	541.005	132.509	544.903	132.63	650.593
755	Pydc4	923.371	5.15654	0.334722	15.4054	1.50447e-53	3.78289e-52	23.7597	1935.78	38.1119	1924.14	77.6657	3717.16	2094.61	56.1003	1633.42	26.8526	926.665	56.5714	48.4249	1649.65	133.929	1731.36	14.5544	956.707	30.8984	1391.05
756	Serpina3g	75.7266	7.27945	0.472558	15.4044	1.52976e-53	3.84139e-52	1.04489	71.7262	0.361326	273.895	1.98819	273.372	122.996	1.70254	150.29	1.77526	107.279	0	0	146.349	0	128.079	2.77721	95.481	3.61486	131.801
757	Rars	1815.34	1.43356	0.0930628	15.4042	1.53424e-53	3.84756e-52	825.453	2424.7	946.706	2788.3	800.066	2666.65	2830.01	823.566	2526.05	1051.67	2196.99	1339.81	879.347	2888.87	1018.08	2546.24	1153.29	2731.04	968.896	2901.07
758	Tapbp	2652.02	2.20343	0.143075	15.4005	1.62424e-53	4.06788e-52	1108.1	4065.21	907.034	5547.97	716.286	3753.53	4027.6	830.848	4556.21	710.195	3468.84	773.873	1139.63	4684.18	1700.88	4158.11	772.178	4050.41	814.632	5254.64
759	Serpinb8	333	-1.68222	0.109274	-15.3946	1.77914e-53	4.44995e-52	519.909	189.748	478.144	157.266	428.801	184.903	187.996	470.126	132.637	499.394	160.121	670.425	490.665	152.602	508.323	112.161	513.829	146.274	473.341	183.326
760	Psmb9	989.208	2.61118	0.169693	15.3877	1.98082e-53	4.94788e-52	286.459	1578.82	256.423	1948.65	267.915	2055.51	1943.48	177.746	1732.12	247.259	855.17	274.409	297.38	1873.12	510.127	1463.67	216.041	1252.4	257.41	2290.06
761	Tspo	6953.19	1.69599	0.110266	15.3809	2.19845e-53	5.48429e-52	3188.51	10819.8	3007.82	12692.4	2849.16	8185.08	10002.9	2887.98	11213.3	3962.17	9959.08	2830.93	3613.98	11771.3	4397.74	11258.3	2987.59	7382.81	3080.95	12972.1
762	Ing4	623.136	-1.80348	0.117375	-15.3651	2.80413e-53	6.98603e-52	1281	239.46	947.283	224.296	638.383	263.491	339.356	1043.49	320.045	938.544	230.39	747.464	1112	278.131	1026.4	292.762	918.94	290.562	1053.67	277.056
763	Stat1	5482.79	3.37944	0.220087	15.355	3.27816e-53	8.1563e-52	724.558	11030.1	741.878	10708.7	763.777	10925.6	11572.3	536.21	9745.83	708.393	8631.97	986.732	858.446	11250.8	2845.56	8317.68	706.887	8370.75	750.305	9479.38
764	Sertad1	480.002	1.64607	0.10721	15.3537	3.34487e-53	8.31139e-52	222.495	660.427	231.328	933.528	223.654	650.597	692.031	169.176	716.245	242.234	680.659	268.195	234.854	803.597	268.043	647.981	218.837	544.979	246.781	944.394
765	C330006A16Rik	636.573	-1.68572	0.109824	-15.3493	3.58071e-53	8.88579e-52	1199.7	361.269	997.324	310.476	1131.96	211.2	310.133	889.845	332.956	882.844	266.206	790.114	1170.44	338.367	991.045	335.779	758.845	259.573	900.231	293.151
766	Hdac1	1481.99	1.3136	0.0856835	15.3309	4.7547e-53	1.17837e-51	655.073	1736.56	816.709	2236.84	806.556	2315.44	1795.96	828.217	1989.66	935.973	2036.99	965.057	902.728	2325.46	864.433	2119.33	940.858	1923.65	787.371	2656.98
767	Pla2g15	1339.07	-2.67535	0.174529	-15.329	4.89197e-53	1.21081e-51	3880.94	382.762	2339.96	225.805	1515.46	258.182	435.782	2578.48	432.594	1933.16	527.603	1438.73	3231.73	371.486	2046.47	323.094	1840.2	353.756	2342.16	322.957
768	Tspan4	1088.08	-1.17495	0.0766794	-15.3229	5.37599e-53	1.32888e-51	1763.39	759.205	1539.74	622.922	1428.09	602.119	683.352	1396.09	583.826	1524.47	697.319	1540.61	1761.26	659.621	1365.35	609.538	1374.12	686.816	1349.54	814.157
769	Lrp11	162.13	2.77847	0.181364	15.3198	5.63694e-53	1.39157e-51	27.5622	316.2	64.4994	328.774	51.9493	145.515	273.059	44.1713	355.409	29.7858	301.416	39.1339	37.7012	305.565	52.1857	220.597	30.3983	208.282	34.1148	376.276
770	Inpp5d	1220.21	-1.94313	0.126996	-15.3007	7.56532e-53	1.86519e-51	2701.44	759.646	1849.94	305.519	1571.67	459.257	639	1550.09	457.321	1910.74	511.249	1961.5	1941.58	532.457	2097.46	463.293	1906.69	536.045	1829.59	419.787
771	Paqr4	188.851	-2.06157	0.134746	-15.2997	7.67666e-53	1.89019e-51	324.285	91.3774	297.691	74.2772	283.151	81.0938	54.649	236.801	72.9485	400.587	72.1958	285.781	297.446	101.77	261.9	52.1275	368.508	58.3225	280.688	81.4252
772	Cln6	426.961	-1.79947	0.117619	-15.2992	7.73965e-53	1.90323e-51	719.569	154.116	660.658	182.323	617.533	107.633	211.937	675.245	229.179	761.956	245.798	505.779	643.321	181.489	615.152	183.058	737.129	228.343	703.685	175.319
773	Haus4	130.5	-4.12871	0.270023	-15.2902	8.88659e-53	2.18245e-51	179.904	0	203.205	32.6988	271.325	18.3463	19.1722	209.708	8.55675	338.949	15.4429	335.176	189.774	7.63023	174.453	4.19056	292.152	24.382	279.486	5.43894
774	Dusp2	98.7728	6.4955	0.42566	15.2598	1.41588e-52	3.47274e-51	1.60588	195.757	0.556893	76.8719	5.61438	294.062	74.9216	1.81382	134.066	0.879111	249.393	1.6274	3.52945	495.458	6.35782	97.5295	1.585	87.3725	0.977606	245.477
775	Rassf2	573.657	-2.62559	0.172079	-15.258	1.45602e-52	3.5666e-51	1235.56	106.456	909.948	144.997	1154.8	321.093	155.555	983.133	136.355	881.892	243.177	837.731	1059.95	136.284	818.065	92.3224	968.469	155.594	1016.63	115.129
776	Stat2	2286.94	3.28493	0.215428	15.2484	1.6878e-52	4.12902e-51	357.073	3894.81	256.72	4201.45	349.806	5191.59	4211.76	298.4	4110.52	306	3619.84	416.887	427.086	4815.19	1224.01	3521.49	313	3343.52	315.037	4564.52
777	Pigv	421.266	1.79061	0.117666	15.2177	2.69749e-52	6.59062e-51	262.801	706.623	180.003	697.135	128.735	640.296	713.135	202.066	615.708	192.228	507.489	172.433	256.578	664.084	159.23	615.326	159.732	572.308	181.546	797.858
778	Hmox1	17556.2	2.53927	0.166873	15.2168	2.73618e-52	6.67657e-51	5144.84	30645.7	4136.91	19686.3	4961.02	10985.5	33528	4014.18	35458.7	6095.9	40236.2	6713.96	5114.59	28358.5	4766.28	35947.1	5659.88	36746.4	4927.36	27996.9
779	Nono	3193.43	1.02456	0.0673393	15.2149	2.81841e-52	6.86838e-51	2082.46	4655.18	2080.43	4767.42	1960.62	4305.66	4302.8	1876.72	4210.1	2054.38	3414.89	2451.37	2011.59	4755.02	2237.52	4072.88	2256.31	3867.29	2034.1	4471.78
780	Tbl1xr1	293.725	-2.49622	0.16413	-15.2087	3.09449e-52	7.5315e-51	593.101	26.9818	614.638	105.34	358.509	92.2873	119.382	636.249	97.3595	330.087	101.248	412.157	563.758	68.5435	544.279	82.6496	469.303	110.783	488.72	59.1326
781	Ass1	3847.44	2.56019	0.16859	15.1859	4.38512e-52	1.06591e-50	883.491	7046.42	728.35	5331.24	627.41	4835.57	6977.84	1144.08	7589.47	1957.05	7914.7	849.405	1035.92	6097.43	1512.04	7112.75	1481.47	6961.09	940.151	5923.03
782	Lat2	1374.85	-2.35636	0.155171	-15.1855	4.411e-52	1.07082e-50	1990.34	255.164	2474.83	326.763	2181.31	540.544	815.565	2077.34	345.092	2415.76	346.202	2624.16	2749.66	341.24	2061.6	448.414	2101.33	552.438	2347.34	501.829
783	Lipg	144.347	7.61878	0.502015	15.1764	5.06752e-52	1.22863e-50	1.7537	151.949	0	306.12	7.74947	465.946	347.525	1.46169	269.925	0	147.22	0.654145	0	378.087	0	276.862	0.859918	141.783	1.05425	387.999
784	Wdr37	629.759	1.33917	0.0882601	15.173	5.33419e-52	1.29164e-50	433.452	799.427	335.243	1147.62	331.44	1051.54	830.421	414.549	869.698	341.94	867.375	341.508	323.04	824.513	310.94	1011.43	380.29	846.957	359.302	774.482
785	Acbd3	507.479	1.22537	0.0807812	15.169	5.67164e-52	1.3716e-50	303.017	729.359	295.724	723.75	242.379	588.495	788.81	305.3	835.723	318.488	628.593	350.93	292.927	741.203	302.306	754.494	317.69	683.108	318.364	628.92
786	Aph1c	848.62	-3.59066	0.23677	-15.1652	6.01271e-52	1.45223e-50	2272.3	266.922	2025.92	132.017	845.194	74.2356	191.387	2004.44	125.056	984.34	68.0204	742.207	2326.91	99.8422	1772.04	96.5001	1039.21	124.737	1632.1	149.03
787	Tgtp2	858.993	5.86206	0.386671	15.1604	6.47197e-52	1.56117e-50	26.8925	875.729	39.7428	2214.36	34.1427	3717.71	2563.08	13.6115	1414.79	13.2785	603.063	24.8168	72.569	1596.69	62.833	1236.86	9.06094	993.831	11.2739	1655.53
788	Gnb4	433.344	2.63608	0.173915	15.1573	6.77942e-52	1.63325e-50	100.189	479.899	96.4965	1331.84	103.783	730.238	973.837	122.392	632.286	144.054	696.746	181.507	101.524	703.865	105.783	554.538	107.303	482.459	136.12	882.022
789	Cdk4	1465.92	-1.20443	0.0795135	-15.1475	7.87402e-52	1.89455e-50	1942.45	834.289	1851.25	772.194	2145.71	778.479	911.243	1766.77	858.826	2377.32	902.443	2265.97	2046.76	898.448	1901.19	806.136	2071.04	930.416	2053.06	1204.47
790	H2-T10	97.8705	2.70794	0.178779	15.1468	7.94942e-52	1.91028e-50	24.5582	121.127	16.7882	156.395	19.304	123.5	206.998	21.0236	177.233	27.0139	207.211	33.1774	33.6097	166.514	51.6936	178.172	19.5211	153.906	19.0474	200.618
791	Comt	998.026	-1.25448	0.0829269	-15.1276	1.0658e-51	2.55792e-50	1606.41	560.591	1333.61	473.599	1228.43	577.831	544.939	1418.44	579.102	1501.96	616.873	1304.61	1704.48	550.671	1398.35	676.502	1198.2	608.798	1368.85	708.274
792	Rbm7	1372.09	1.62862	0.107802	15.1076	1.44389e-51	3.46097e-50	692.621	2219.27	622.472	2225.09	578.977	1486.26	2489.33	845.821	2267.61	495.986	1786.06	586.222	710.834	2217.01	828.555	2220.97	688.023	2140.57	663.891	1676.16
793	Oas1b	179.332	2.58135	0.170902	15.1043	1.51803e-51	3.63407e-50	46.3976	376.707	39.2439	291.093	46.5003	253.749	300.429	45.9522	288.539	66.935	257.138	43.5197	57.3312	363.442	105.437	257.699	43.5506	334.408	26.2711	342.299
794	Psmb4	2753.59	1.24761	0.082648	15.0955	1.73436e-51	4.14673e-50	1533.7	4031.17	1426.35	4199.03	1332.03	3737.45	3785.56	1324.89	4007.79	1961.43	3443.98	2026.18	1670.49	3880.95	1625.28	3800.47	1580.52	3622.45	1842.02	4240
795	Atf4	1825.07	1.19074	0.0789541	15.0814	2.14554e-51	5.12338e-50	1075.88	2574.1	1178.65	2853.37	962.84	2370.35	2407.86	867.197	2518.87	1107.29	2314.67	1328.38	1032.92	2490.15	1161.43	2606.51	1124.12	2277.32	1277.26	2972.25
796	Epb4.1	517.656	-1.93572	0.128422	-15.0731	2.43405e-51	5.80503e-50	939.333	217.639	803.879	162.227	835.256	267.574	179.819	737.784	215.436	736.963	192.234	999.527	795.895	324.891	663.453	189.1	862.159	260.206	841.564	128.182
797	Cers5	710.7	-1.24812	0.0828132	-15.0715	2.49234e-51	5.93658e-50	916.954	343.568	931.495	363.316	879.378	446.388	423.907	1005.03	412.91	1149.57	500.372	1045.16	1059.06	377.447	915.037	433.7	1097.98	529.059	1014.62	369.041
798	Anln	244.725	-3.39148	0.225048	-15.0701	2.54868e-51	6.06317e-50	189.546	13.009	375.437	51.9982	472.703	67.0938	54.7213	312.458	32.9472	576.957	48.9413	658.041	333.796	29.2764	356.562	36.3949	672.904	43.6701	524.66	43.392
799	Mitd1	350.221	1.99653	0.132493	15.0689	2.5925e-51	6.1597e-50	124.532	492.004	103.794	627.929	137.616	602.466	601.62	138.198	490.911	122.316	568.868	126.543	111.857	612.539	269.385	561.024	134.845	534.061	142.847	501.069
800	Plekhm3	2276.88	1.1565	0.076762	15.0661	2.70602e-51	6.42137e-50	1408.68	2743.32	1386.42	3325.87	1041.93	3300.97	3316.5	1426.32	3375.93	1563.37	3075.96	1558.21	1349.16	3108.98	1404.63	3021.38	1704.83	3280.06	1264.04	2881.05
801	Trip12	1691.79	1.12191	0.0744805	15.0632	2.82779e-51	6.70197e-50	1109.75	2163.41	1069.81	2340.4	851.914	2805.61	2370.3	1117.64	2304.74	1094.23	1840.52	1015.86	1105.45	2624.83	1079.61	2441.85	1088.43	2097.45	1138.97	2175.07
802	Gpr183	122.235	-4.32339	0.287416	-15.0423	3.87906e-51	9.18206e-50	193.271	8.6987	197.658	10.3989	334.069	22.6273	5.90902	137.629	6.5955	248.024	15.1807	471.622	186.427	8.90557	138.76	20.844	234.539	9.71834	185.68	8.14167
803	Gm8113	382.497	2.47597	0.164622	15.0403	3.99715e-51	9.4498e-50	83.0797	656.757	124.742	729.41	189.711	789.277	737.148	160.081	633.558	74.7865	557.904	122.739	88.1053	576.317	153.24	576.34	70.4475	512.159	94.9504	719.183
804	Pisd	2030.02	1.05672	0.0703034	15.0308	4.61231e-51	1.08906e-49	1359.24	2821.55	1320.98	2835.67	1113.39	2424.29	2617.88	1320.3	2721.97	1426.1	2648.16	1278.26	1595.32	2768.08	1211.15	2618.15	1296.19	2545.38	1256.91	3421.44
805	Hscb	155.324	-2.57026	0.171032	-15.028	4.81558e-51	1.13564e-49	377.312	16.8765	327.595	47.9549	210.457	36.2691	34.9555	262.85	57.8347	213.798	53.5895	206.168	353.554	41.7776	283.99	53.0543	197.813	42.2581	236.596	51.7692
806	Zfp36l2	211.739	-2.77726	0.184851	-15.0243	5.08981e-51	1.19882e-49	375.907	17.3676	389.295	49.0255	390.102	50.8136	81.3025	438.547	78.329	263.739	41.555	302.316	332.292	71.2659	483.391	65.5742	362.317	37.8706	384.77	18.9897
807	Ankmy2	108.567	-2.99034	0.199045	-15.0234	5.15574e-51	1.21284e-49	191.336	4.35306	201.272	19.3119	194.093	9.29573	28.0586	172.905	24.4485	139.258	30.4314	196.91	247.606	25.4407	189.528	11.4715	212.573	38.8891	182.587	51.574
808	Tmem229b	1011.08	1.86387	0.124126	15.016	5.77064e-51	1.35581e-49	449.995	1261.3	379.818	2160.19	382.354	1572.55	1624	460.526	1708.06	451.212	1164.21	406.945	315.683	1322.79	601.56	1489.98	539.782	1558.91	376.924	1994.75
809	Fam219a	740.473	2.25252	0.15007	15.0098	6.33148e-51	1.48575e-49	277.551	1416.65	250.345	1062.82	166.519	945.565	1226.62	273.177	1391.91	338.14	1179.06	181.363	322.651	1423.49	158.375	938.034	314.478	1010.53	291.43	1640.76
810	Cxcl16	7434.3	1.54192	0.102782	15.0019	7.13921e-51	1.67322e-49	5070.59	12056.3	3730.58	13029.8	3018.71	9500.01	11515.4	3785.2	11099.8	3612.36	9314.91	3210.89	4699.92	11897.9	4438.56	10508.3	3199.59	9522.6	3252.3	12222.2
811	Dcaf13	765.641	1.25013	0.0833368	15.0009	7.24203e-51	1.69522e-49	408.027	1133.74	424.208	1045.64	395.352	915.786	1208.32	447.258	1131.18	499.669	764.681	499.21	447.932	1160.2	492.836	1282.84	462.953	1089.81	467.688	1035.5
812	Mr1	93.8545	-2.74078	0.182761	-14.9965	7.74327e-51	1.81032e-49	180.825	18.0897	214.504	21.8771	120.975	27.9053	11.8897	185.421	24.1512	147.94	18.6033	128.038	204.524	37.0101	158.41	34.875	149.03	19.6983	150.233	23.0905
813	Sh3bgrl2	4336.63	1.45841	0.0972777	14.9923	8.24745e-51	1.92582e-49	2234.46	6705.31	1944.85	6880.34	2183.78	7137.61	8585.01	2319.11	5541.63	2211.33	5059.54	3119.82	2282.2	6323.85	2336.81	5469.05	2252.8	5547.89	2249.96	6347.28
814	Srpr	1890.86	1.12364	0.0749715	14.9876	8.84869e-51	2.06368e-49	1208.43	2758.65	1263.91	2516.3	958.031	2915.74	2407.39	1053.54	2520.25	1201.85	2237.05	1276.29	1238.21	2807.91	1392.8	2731.75	1310.18	2508.49	1001.69	2508.7
815	Rictor	340.567	1.36543	0.0911744	14.976	1.05419e-50	2.45556e-49	189.103	493.342	192.842	506.631	170.016	474.945	627.558	244.836	491.574	208.333	370.701	181.442	166.435	474.95	172.063	454.765	178.982	497.357	203.14	512.323
816	Thbd	82.7623	-3.54069	0.236556	-14.9677	1.19432e-50	2.77855e-49	216.503	4.34064	156.08	8.91379	140.558	34.7946	7.39196	166.116	10.8565	101.123	18.8739	146.945	195.571	10.1813	147.043	9.36571	129.38	15.5345	127.537	8.13789
817	Mgat4a	1036.42	1.90139	0.127044	14.9664	1.21717e-50	2.82823e-49	420.684	2345.2	485.165	1514.88	337.259	1715.69	2167.81	401.928	1509.73	513.651	1428.59	521.019	342.288	1676.38	374.956	1387.8	568.447	1262.15	399.628	1355.05
818	Bcas2	461.674	-1.2667	0.0846587	-14.9624	1.292e-50	2.99846e-49	687.295	318.389	675.667	271.365	673.568	258.049	320.524	573.973	254.881	612.616	188.17	689.793	736.697	329.883	591.552	273.189	672.667	272.626	615.436	217.142
819	Fam114a1	255.923	1.72339	0.115232	14.9558	1.42722e-50	3.30823e-49	144.118	385.717	106.182	343.31	119.659	341.476	505.758	140.31	430.268	139.364	393.629	101.611	134.581	479.797	98.2598	380.639	91.6795	354.185	121.406	306.514
820	Ewsr1	2919.29	0.766128	0.0512436	14.9507	1.54076e-50	3.56705e-49	2171.42	3706.46	2129.94	3636.27	2015.14	3513.6	3418.37	2048.88	3573.08	2085	3803.27	2416.99	2219.4	3992.17	2115.52	3520.27	2280.61	3428.78	2107.96	4202.75
821	Adprh	1130.47	1.06133	0.0710414	14.9396	1.8206e-50	4.20978e-49	767.509	1495.24	708.68	1595.52	835.858	1421.26	1408.16	658.972	1712.95	800.455	1500.37	729.711	715.296	1852.56	704.418	1540.69	739.419	1277.58	668.678	1476.14
822	Poldip3	2499.8	1.18695	0.0794525	14.939	1.83577e-50	4.2397e-49	1728.42	3455.25	1498.16	3883.24	1108.14	2895.9	3672.51	1418.1	3433.24	1484.81	3363.97	1723.65	1656.56	3559.79	1450.47	3265.82	1642.57	3275.59	1544.67	3935.08
823	Chtop	948.01	1.01755	0.0681367	14.9339	1.98255e-50	4.57312e-49	672.904	1278.05	582.058	1397	533.851	1167.87	1381.99	567.339	1222.15	559.762	1177.66	740.213	663.887	1313.67	653.776	1230.05	664.298	1234.3	630.136	1289.25
824	Mat2a	4021.9	1.54681	0.103684	14.9185	2.49645e-50	5.75154e-49	1871.97	7496.63	1646.35	6291.38	2081.96	5191.39	5816.45	1787.35	6096.94	2361.48	4790.48	2866.87	1842.77	6889.36	1798.84	5941.64	2388.09	5741.97	1853.45	5682.6
825	Mtg1	156.128	-1.5522	0.104296	-14.8827	4.27115e-50	9.82831e-49	206.834	46.011	257.521	71.2016	217.699	73.1908	59.4397	219.245	78.771	222.846	132.155	244.066	226.689	79.1144	217.64	87.3875	257.832	94.1746	250.683	80.0584
826	Tbc1d4	120.377	-3.1545	0.212096	-14.873	4.93647e-50	1.13455e-48	319.987	22.219	240.563	21.4584	118.944	31.7097	34.269	196.744	26.3977	192.785	3.92167	157.431	289.075	21.1634	230.489	20.8831	172.913	31.4492	255.08	20.0688
827	Lpar6	250.479	-2.78895	0.187598	-14.8666	5.42922e-50	1.24629e-48	566.393	69.3392	491.142	49.0275	488.275	126.343	69.5268	503.448	54.2558	235.008	41.3452	341.133	518.123	53.4667	458.798	57.1661	328.561	46.5679	446.573	65.0787
828	Clcf1	51.1472	6.29548	0.42359	14.8622	5.79916e-50	1.3296e-48	2.10299	161.332	0.727748	80.1039	2.00189	22.2705	83.6409	2.51047	124.39	2.29399	125.374	0.469658	0	138.049	0	100.35	2.47164	61.5757	0	113.28
829	Pycard	692.494	-1.82127	0.122607	-14.8546	6.49931e-50	1.48834e-48	1165.05	238.71	962.392	338.725	1123.94	506.006	313.432	974.678	257.446	1248.33	226.422	1291.99	1130.03	243.084	950.901	287.192	948.247	312.616	1016.03	314.657
830	Pnpo	163.677	-2.11684	0.142752	-14.8288	9.53979e-50	2.18197e-48	258.034	51.4251	249.884	46.6974	179.075	77.3558	72.1826	294.155	54.8332	302.668	48.8579	262.288	310.379	52.9234	262.943	50.2799	276.596	95.6064	273.99	53.3584
831	Ttc25	126.327	2.88878	0.194858	14.825	1.00922e-49	2.30553e-48	37.6978	241.894	30.4409	217.311	52.5186	155.086	208.421	40.1496	254.52	20.2359	302.683	18.226	37.2222	246.284	20.2338	268.248	21.3155	170.741	22.574	160.739
832	Vps13c	208.528	-2.30969	0.15584	-14.8209	1.07409e-49	2.45079e-48	400.36	60.5639	330.845	66.8579	290.215	102.647	111.022	378.784	63.9091	441.043	86.0391	270.702	325.25	44.5691	335.635	41.5195	356.286	66.8842	337.808	59.6301
833	Gatc	214.533	-1.85194	0.124965	-14.8196	1.09364e-49	2.49239e-48	343.771	69.8856	306.717	89.1231	299.447	75.007	75.2161	318.967	83.1323	372.408	80.6209	308.281	400.042	94.0733	370.091	123.371	271.536	132.435	386.885	89.6451
834	Chek2	178.347	-3.81974	0.257819	-14.8156	1.16133e-49	2.64348e-48	319.255	0	338.394	17.8117	268.481	0	30.9789	334.525	26.7611	368.433	38.081	299.91	369.698	25.4171	336.665	23.9793	349.634	51.5039	356.56	10.8507
835	Fbxw17	961.816	1.85687	0.125455	14.8011	1.44177e-49	3.27792e-48	396.299	1503.95	325.85	1752.13	396.65	1435.35	1698.02	349.373	1521.27	355.582	1498.46	416.632	388.001	1520.35	758.087	1173.81	376.244	1372.7	406.908	1590.66
836	Xrn2	1398.33	1.12003	0.0756915	14.7973	1.52431e-49	3.46143e-48	931.071	1974.33	861.585	2165.57	688.51	1854.56	1825.75	828.354	1856.22	770.887	1629.56	928.085	847.612	2068.35	1058.87	1928.76	895.993	1872.36	1011.85	1968.39
837	Slc11a2	2556.39	1.22518	0.08283	14.7915	1.6622e-49	3.77003e-48	1816.19	3374.03	1584.41	3783.41	1433.3	2700.37	4030.27	1419.27	3528.42	1288.34	3915.44	1589.43	1865.38	3543.63	1342.27	3436.32	1475.97	3527.12	1501.77	3972.39
838	Hpgd	933.295	-4.93476	0.334043	-14.7728	2.19299e-49	4.96799e-48	2962.04	26.231	1817.98	80.2085	537.991	43.319	66.3434	2657.85	60.6177	1136.14	53.8815	435.479	2812.94	55.9262	2463.68	27.2019	1609.43	81.8333	1644.42	92.3806
839	Ppp6r1	361.167	2.42267	0.164071	14.766	2.42858e-49	5.49514e-48	95.5624	473.04	100.638	711.62	54.2335	540.933	578.093	81.8258	810.314	134.179	667.797	105.318	163.631	565.083	183.182	569.146	111.764	501.914	115.932	659.14
840	Nbeal2	215.265	-2.52159	0.170906	-14.7543	2.8886e-49	6.52823e-48	433.597	69.702	354.66	47.6372	265.36	55.3232	63.0221	350.906	49.6324	486.836	138.33	389.522	325.448	92.2271	270.44	59.6721	439.169	41.9297	313.656	58.2394
841	Gm16181	65.5955	3.1958	0.216679	14.749	3.12355e-49	7.05083e-48	16.9274	129.084	16.336	163.241	19.2749	66.7212	177.646	14.5087	143.724	4.9185	93.1738	11.4509	8.82964	86.897	8.57445	115.866	12.3777	110.034	13.8047	98.5198
842	Tmco3	1251.36	1.58729	0.107769	14.7287	4.21546e-49	9.50431e-48	699.182	1995.22	595.395	1601.54	392.971	1602.42	2088.08	648.433	2030.1	741.424	1989.15	485.282	702.027	2148.54	652.987	1589.21	701.655	1703.34	634.303	2025.99
843	Sgpp1	144.429	-2.56776	0.174348	-14.7278	4.27519e-49	9.62756e-48	280.284	34.7475	205.494	38.6258	190.33	44.0855	33.9946	298.31	58.1714	171.15	30.2505	226.806	192.949	47.0835	318.305	39.5632	281.484	50.5027	324.736	21.7043
844	Tsc22d3	190.79	-3.5531	0.241295	-14.7251	4.44644e-49	1.00013e-47	399.13	21.4389	402.473	14.945	242.197	38.1107	49.3053	487.651	27.9291	213.609	52.6558	235.195	569.78	42.7853	408.124	18.2806	224.895	19.7148	331.564	16.0149
845	Ptpn2	471.362	1.25695	0.0854485	14.7101	5.55439e-49	1.24786e-47	254.455	712.592	290.403	742.777	307.29	605.464	815.504	261.667	712.224	234.412	557.527	313.272	274.709	640.808	268.566	692.332	293.831	657.48	282.937	508.983
846	Ddx10	412.557	1.31259	0.0892581	14.7056	5.93687e-49	1.33222e-47	248.645	586.587	228.393	546.699	200.27	600.548	567.48	222.835	537.954	201.473	598.057	321.605	227.405	626.042	223.102	648.813	250.082	649.854	236.213	529.089
847	Smpdl3b	775.997	2.51696	0.171176	14.704	6.0793e-49	1.36257e-47	159.513	1077.39	159.086	1387.41	192.333	1277.13	997.51	139.954	1211.53	383.373	1675.32	337.474	145.343	1298.28	256.211	1360.92	284.532	1376.05	247.199	1553.37
848	Adrb2	205.435	-2.5028	0.170456	-14.683	8.28782e-49	1.85538e-47	312.313	34.8699	365.781	66.8464	301.821	26.4661	72.3252	395.618	74.5391	449.526	45.8085	251.014	387.733	53.413	310.47	64.7208	421.962	96.31	314.703	62.4504
849	Coro2a	959.458	1.93698	0.13193	14.6818	8.42741e-49	1.8844e-47	327.45	1496.7	387.073	1914.93	449.55	1643.17	1153.59	321.513	1608.23	502.509	1390.61	261.939	340.913	1703.44	522.306	1551.56	489.761	1065.59	375.284	1683.03
850	Rin3	434.917	1.65518	0.112744	14.681	8.53599e-49	1.90644e-47	256.366	786.828	182.999	607.643	180.027	526.951	545.841	217.395	819.758	297.232	608.39	170.552	199.471	727.136	188.162	719.862	214.173	661.685	197.794	590.084
851	Rbl2	245.362	-2.39259	0.162974	-14.6808	8.56164e-49	1.90992e-47	431.325	59.3541	424.798	54.6087	332.813	67.0609	102.263	371.776	63.7269	356.823	136.5	421.132	447.192	119.785	423.073	56.2463	393.896	86.8391	534.691	23.3419
852	Sumo1	1603.82	1.15342	0.0786368	14.6676	1.03896e-48	2.31498e-47	995.181	2472.03	989.86	2394.6	990.836	1970.06	2114.36	1012.68	2160.83	729.519	2025.59	916.523	1090.89	2502.98	1120.07	2452.08	1000.23	2060.36	1108.25	1969.56
853	Ctu1	255.985	1.61195	0.109984	14.6562	1.22949e-48	2.7363e-47	144.169	417.865	106.06	380.296	83.5003	349.317	410.553	121.612	385.735	134.514	395.536	143.735	145.506	445.217	115.885	301.373	121.534	328.603	143.532	445.159
854	Neurl2	104.722	-2.81052	0.191813	-14.6524	1.30023e-48	2.89035e-47	245.475	13.2634	195.186	31.1784	211.457	12.743	32.2895	198.686	21.0519	128.595	23.821	140.246	229.088	29.1718	188.708	21.0998	137.993	40.1509	161.557	32.6843
855	Lrrc25	2587.5	1.53486	0.104767	14.6502	1.34397e-48	2.98408e-47	1436.37	3618.22	1134.08	4212.65	1652.81	4587.3	3362.12	1102.15	3922.26	1551.36	3471.1	1295.36	1507.77	4500.88	1305.66	3473.34	1166.65	2765.55	1129.61	4554.83
856	Setdb2	371.362	1.90899	0.130367	14.6431	1.49006e-48	3.30458e-47	206.032	400.048	132.499	767.701	154.467	668.636	515.431	139.324	454.293	160.634	586.746	178.003	106.278	564.417	175.465	544.248	171.762	579.232	137.328	784.703
857	Sp100	2310.73	2.80246	0.191494	14.6348	1.68586e-48	3.73446e-47	462.299	3845.17	496.595	4348.37	497.841	4692.39	4557.79	453.179	4172.19	387.869	3117.68	584.107	453.738	4258.69	1520.87	3937.56	443.724	3510.09	502.526	3971.99
858	Manba	785.853	-1.89357	0.129579	-14.6133	2.31132e-48	5.114e-47	1133.76	203.396	1308.51	349.673	1068.59	509.256	281.621	1268.5	271.545	1078.43	417.554	1174.6	1343.97	320.283	1415.75	222.618	1267.63	379.752	1309.14	392.488
859	Ch25h	5798.79	4.57747	0.313401	14.6058	2.58059e-48	5.70312e-47	198.351	12154	130.752	10715.5	443.154	11778.2	9099.44	211.499	10482.6	1060.11	10356.8	652.018	260.589	12733.3	624.297	11079.3	843.043	9888.69	237.234	13027
860	Tmem18	263.347	-1.33441	0.0913639	-14.6055	2.59232e-48	5.72239e-47	351.816	126.051	397.126	139.645	344.08	118.664	134.463	406.793	148.176	351.024	159.125	329.773	367.869	187.038	389.598	158.339	427.498	166.134	414.494	149.242
861	Lcp1	38237.7	1.59924	0.109521	14.6021	2.72132e-48	6.00017e-47	15342.6	60196.2	16313.4	58742.9	20999.1	58415.4	60260.9	13836.5	55825.9	21232.8	54941.8	29642	16091.9	61552.4	16937.6	52235.4	21535.8	54147.7	17829	58675.2
862	Hif1a	2224.83	1.58768	0.108755	14.5987	2.86092e-48	6.30066e-47	1130.56	4071.37	1044.89	3254.73	973.39	2852.56	3567.26	1233.91	3922.62	1030.91	2882.09	1253.6	910.602	4172.84	1031.07	3264.73	1462.86	3079.14	1030.56	2326.9
863	Frrs1	1048.52	-1.26645	0.0867815	-14.5936	3.08701e-48	6.7907e-47	1470.79	539.938	1405.89	613.518	1206.5	504.227	674.808	1317.66	600.4	1896.08	567.234	1413.75	1522.41	587.649	1546.65	697.83	1655.34	708.853	1397.56	643.362
864	Msn	20128.2	1.10168	0.0755125	14.5893	3.28354e-48	7.21468e-47	11982.9	30447.6	11770.4	27159	11077.1	21292.5	28842	12061.1	27547.5	14257.6	30154.2	12111.1	11972.8	29127.9	13552.9	26446.9	15938.2	27053.4	13223.7	26545.1
865	Ntpcr	214.361	-1.77163	0.121448	-14.5875	3.37382e-48	7.40446e-47	411.461	70.9115	263.275	129.985	370.936	98.4425	94.1509	241.5	106.634	360.336	83.6543	294.775	363.373	83.6594	354.015	99.6903	358.531	88.7882	312.071	101.032
866	Zfyve21	213.927	-1.54521	0.105968	-14.5818	3.66614e-48	8.03673e-47	356.371	101.002	341.032	121.779	284.123	88.2094	126.566	320.06	106.221	297.738	116.883	295.507	389.997	105.41	246.242	114.419	281.33	104.458	375.117	106.071
867	Inhba	336.544	6.58431	0.451914	14.5698	4.36943e-48	9.56739e-47	2.25404	375.318	5.25618	463.098	11.6468	219.284	2149.78	9.97772	1095.61	5.32418	502.199	12.57	0.656552	464.176	4.94115	572.024	2.86886	331.452	13.542	488.891
868	Casp7	460.986	2.24143	0.153846	14.5693	4.40139e-48	9.62626e-47	130.119	683.703	124.138	962.612	167.533	619.492	1085.26	123.13	848.038	231.226	567.395	186.167	186.303	742.815	121.952	632.165	159.302	494.958	181.565	971.853
869	Jarid2	440.559	1.71022	0.117476	14.558	5.19213e-48	1.13426e-46	245.678	613.698	202.183	659.179	223.411	769.945	947.367	235.567	746.041	149.739	592.5	211.449	236.354	614.218	199.234	534.786	205.234	538.874	156.836	728.891
870	Scarb1	727.235	-1.57752	0.108407	-14.5519	5.68148e-48	1.23974e-46	1261.9	318.345	1216.6	392.44	992.673	286.927	403.655	946.162	328.729	1200.09	299.079	877.813	1285.3	430.831	1066.8	302.057	1071.89	370.872	978.971	513.574
871	Ptgr2	415.5	-1.76958	0.121678	-14.5431	6.4582e-48	1.40761e-46	750.902	120.241	654.048	156.094	585.981	239.418	208.183	651.139	167.457	524.775	282.586	760.165	682.583	164.752	711.102	185.284	540.877	222.633	564.561	137.229
872	Sbds	1254.33	1.77731	0.122313	14.5308	7.72761e-48	1.68235e-46	578.559	2135.39	596.405	2799.39	429.797	1319.28	2231.44	551.989	1866.77	592.299	1220.08	586.675	643.031	2021.95	569.791	1765.56	587.687	1832.75	532.527	2225.22
873	Ldlr	3654.66	1.53369	0.105557	14.5295	7.88335e-48	1.71429e-46	1956.05	4609.41	1724.72	6005.05	1786.76	5162.47	6355.11	1348.61	5337.8	1981.07	5285.39	2717.7	1899.2	5846.39	1522.6	4377.73	1981.32	5203.48	1841.56	6150.78
874	Kctd12b	88.3809	-3.60481	0.248483	-14.5073	1.08993e-47	2.36743e-46	167.016	34.8426	181.005	8.84441	78.5639	11.9894	8.80513	233.617	11.1523	115.499	15.1208	112.373	161.224	7.67228	191.175	19.5999	180.404	12.5684	199.798	16.3454
875	Gtpbp2	756.126	2.04576	0.141226	14.4857	1.49153e-47	3.23602e-46	271.178	887.235	279.672	1704.56	187.644	1255.88	1143.45	319.776	1359.13	367.347	850.08	210.135	327.492	1301.3	338.167	991.676	330.649	1104.52	327.974	1564.66
876	Pilrb1	402.095	3.75972	0.259727	14.4757	1.72651e-47	3.74155e-46	22.3208	822.173	15.6632	538.945	36.8968	573.725	821.979	36.6587	800.709	117.06	813.445	73.9737	49.3666	745.812	55.9979	897.669	110.231	724.612	32.9462	751.709
877	Nfkbil1	182.608	2.22915	0.154249	14.4517	2.4471e-47	5.29713e-46	92.5365	272.46	53.4282	368.214	51.5609	186.319	323.297	63.6985	347.587	61.7401	283.072	54.4978	93.3212	337.268	71.6146	280.487	39.596	258.421	68.6961	344.339
878	Fnbp1l	1005.16	2.47752	0.171463	14.4493	2.53302e-47	5.47686e-46	297.365	2139.78	203.133	1869.8	420.246	2173.91	1435.1	230.412	1732.86	261.388	1416.89	611.187	225.982	1754.07	295.541	1535.56	227.733	1377.65	278.209	1616.32
879	Mllt11	143.285	2.24485	0.155374	14.4481	2.5774e-47	5.56648e-46	47.0428	301.122	53.0284	169.338	49.1823	152.999	250.805	41.6139	263.702	42.7202	279.598	57.8353	47.1604	294.978	41.1017	260.166	50.6324	265.736	66.5687	130.368
880	Agpat4	1115.52	2.28849	0.158399	14.4476	2.59582e-47	5.5999e-46	279.187	1976.24	223.352	1771.56	437.12	1762.68	1601.53	303.168	1858.48	537.294	1859.75	647.412	324.583	2193.24	262.573	1795.84	462.194	1722.08	304.28	1987.79
881	Phf11c	55.5911	2.9906	0.207056	14.4434	2.75725e-47	5.94139e-46	10.5135	60.7937	11.4498	127.763	17.7062	110.953	116.775	19.0058	89.5774	5.67236	98.2515	11.4292	3.83391	94.1708	24.1108	108.259	11.1743	81.5721	8.43376	100.377
882	Itgb3	257.102	-3.03122	0.209918	-14.44	2.89808e-47	6.23776e-46	501.457	68.8786	563.356	48.093	205.826	42.9743	50.8735	571.981	55.8195	499.843	54.7559	162.423	572.315	52.4504	500.78	60.1442	483.058	57.0939	514.457	75.4594
883	Heatr6	673.764	1.34798	0.0933882	14.4342	3.15244e-47	6.77757e-46	429.238	1154.35	405.571	995.848	319.302	953.98	911.647	370.559	1053.1	463.081	710.057	376.078	374.675	1145.77	349.065	861.811	386.705	831.431	323.635	1059.37
884	Eva1b	415.613	3.20351	0.221956	14.4331	3.20536e-47	6.88355e-46	107.91	779.318	76.8502	804.519	45.2598	576.823	708.374	115.369	899.435	93.8021	551.06	45.1931	175.296	1011.75	58.9404	882.966	56.3584	451.304	46.1156	825.618
885	Pcyox1	1081.04	-2.07571	0.143884	-14.4263	3.53548e-47	7.58389e-46	1948.72	256.791	1840.7	307.23	1338.47	387.447	394.564	1744.42	323.077	1700.52	428.564	1370.52	2186.44	328.086	1751.58	519.747	1796.72	518.183	1782.89	696.139
886	Mesdc1	131.566	2.2602	0.156748	14.4193	3.91028e-47	8.37842e-46	38.604	182.155	41.5813	280.789	49.2609	244.115	156.76	41.862	284.135	55.7203	139.355	42.2666	44.7581	288.937	44.5742	172.637	42.5649	159.165	59.0023	263.074
887	Adcy7	1199.92	-1.5342	0.106429	-14.4152	4.15081e-47	8.88377e-46	2152.23	548.152	1679.07	447.102	1614.94	749.509	742.949	1894.07	480.197	1621.85	653.105	2015.94	1976.69	695.043	1496.01	503.365	1701.95	634.708	1677.35	714.111
888	Fam64a	221.665	-3.40482	0.236357	-14.4054	4.78383e-47	1.02271e-45	171.341	29.5547	357.141	12.8878	377.443	41.5779	42.6141	271.722	34.1089	635.54	37.2772	471.916	303.211	31.8519	420.992	38.3772	592.228	70.8187	453.391	39.3088
889	Abi1	3204.72	1.17338	0.0814739	14.4019	5.03724e-47	1.07567e-45	1976.85	4439.93	2134.06	4732.66	1827.55	3950.87	4677.23	2154.55	4569.89	1302.73	4167.48	2040.68	1973.32	4765.64	2116.33	4049.71	2152.9	4137.28	2002.14	4922.6
890	9530068E07Rik	3680.65	0.991281	0.068874	14.3927	5.75383e-47	1.22731e-45	2691.45	5429.19	2409.06	5341.07	1947.36	4269.48	5163.72	2458.25	5038.91	2425.19	4450.48	2274.18	2599.65	5347.49	2721.52	4511.47	2593.73	4474.72	2520.86	4945.17
891	Ncf1	5504.65	1.57861	0.109779	14.3799	6.9178e-47	1.47393e-45	3294.77	9558.75	2461.99	7123.02	1876.14	6113.33	9186.03	3064.51	8868.34	2505.49	9454	2302.12	3294.28	8412.6	3369.43	8718.59	2870.83	7785.28	2578.08	7255.5
892	Pla2g16	513.882	1.98707	0.138273	14.3706	7.91667e-47	1.68487e-45	278.54	776.729	200.261	1098.95	180.301	720.777	1143.61	167.013	843.314	169.681	543.796	200.549	213.98	826.195	252.545	759.621	194.881	535.536	220.441	950.915
893	Zfp36l1	199.974	-4.08597	0.284388	-14.3676	8.26526e-47	1.75708e-45	590.531	13.9842	331.066	43.2627	588.196	20.9072	3.90632	318.21	31.8762	343.083	30.4173	401.882	489.361	10.3885	273.653	12.4483	210.183	14.1745	225.207	46.7417
894	Ech1	979.324	-0.925012	0.0644004	-14.3634	8.77504e-47	1.86337e-45	1381.61	650.147	1248.84	786.237	1183.42	594.742	708.757	1241.91	619.072	1342.95	608.119	1350.05	1406.14	647.355	1258.37	699.157	1135.01	691.851	1287.04	745.703
895	Atp13a1	1348.33	1.35881	0.0946188	14.3609	9.11017e-47	1.93237e-45	783.849	2174.1	646.617	1834.76	597.132	1862.81	1972.37	664.793	1997.83	836.208	1863.45	826.674	937.079	2294.72	768.851	1644.92	744.965	1476.57	757.751	2281.18
896	Mbnl1	4336.83	-1.21826	0.0849227	-14.3456	1.13579e-46	2.40646e-45	6546.18	2511.96	5930.79	2955.05	5382.19	2937.39	2568.13	5936.12	2239.08	5606.88	2577.68	6884.16	5483.72	2282.55	5687.93	2113.67	6673.42	2505.43	6492.83	3421.51
897	Hivep1	487.458	2.03351	0.1418	14.3407	1.21777e-46	2.57727e-45	220.736	605.932	198.265	937.488	93.5888	948.225	816.971	167.615	797.24	230.039	715.425	208.4	203.549	780.531	161.245	554.49	241.789	731.05	190.521	946.064
898	Paqr7	406.942	-1.89552	0.132227	-14.3353	1.31663e-46	2.7834e-45	801.875	138.79	618.316	162.408	492.267	171.909	180.858	702.374	208.638	681.753	199.227	561.928	661.36	92.2897	528.701	161.523	658.423	234.28	714.087	167.83
899	Rab11fip5	790.168	-1.98951	0.138798	-14.3339	1.344e-46	2.8381e-45	1920.49	290.705	1322.76	230.275	1020.53	277.324	377.048	1396.6	367.525	1070.4	339.361	1091.93	1590.47	426.374	1079.68	320.418	954.356	243.651	1182.39	301.073
900	Trp53inp1	199.748	-3.1745	0.221663	-14.3213	1.61145e-46	3.39909e-45	464.66	47.7403	395.922	26.2938	246.904	57.1792	33.9467	496.821	31.7998	235.699	73.255	242.018	419.924	20.1798	384.918	37.8728	306.823	66.5573	390.356	16.0841
901	Lyl1	207.445	-3.24309	0.226555	-14.3148	1.76842e-46	3.72604e-45	440.321	0	372.627	60.9373	381.386	44.6908	17.7044	336.036	59.0954	430.86	34.6347	394.312	454.949	13.9909	340.188	33.4935	349.75	48.7345	264.509	70.6836
902	Rhoj	125.525	-2.47869	0.17316	-14.3144	1.77916e-46	3.74452e-45	227.744	72.3119	196.296	34.6565	202.381	61.7771	34.5237	205.328	33.2664	253.851	24.5673	325.157	166.656	39.9757	180.409	32.9783	192.498	38.537	166.284	21.3004
903	Ikbip	113.354	-2.10135	0.146804	-14.314	1.79031e-46	3.76381e-45	201.265	16.5514	216.525	57.3451	183.601	65.9186	49.2683	179.261	43.7968	194.721	44.9494	148.327	164.001	27.7641	197.209	40.3349	157.989	38.5784	203.041	36.6366
904	Rbfa	272.003	-1.83318	0.128111	-14.3093	1.91491e-46	4.02131e-45	507.488	100.895	336.822	115.843	417.752	139.189	72.1436	342.379	126.026	485.306	120.429	468.095	569.44	114.322	366.121	125.867	370.527	125.873	388.707	146.833
905	Tagap	255.623	1.85996	0.129991	14.3084	1.93958e-46	4.06863e-45	102.422	391.101	80.1485	441.221	107.324	444.273	500.957	95.5803	392.522	123.922	295.331	97.9355	160.963	474.612	145.93	333.286	115.584	333.201	85.4206	390.722
906	Polr3gl	119.816	-2.29006	0.1601	-14.3039	2.06816e-46	4.33355e-45	217.814	5.86749	194.394	30.9959	153.596	68.6375	46.2038	215.196	44.0958	200.059	31.6255	181.365	238.181	54.329	223.641	45.3305	192.875	37.0867	185.921	29.1112
907	Pdcd10	1313.43	1.40163	0.0980956	14.2884	2.58455e-46	5.40961e-45	770.431	1698.34	756.307	2268.29	716.911	2001.81	2115.57	624.067	1739.53	580.261	1220.34	798.54	641.817	1992.03	800.887	2010.42	754.362	1795.18	770.914	2212.61
908	Ccna2	593.395	-3.2022	0.224287	-14.2772	3.03482e-46	6.34505e-45	477.66	132.403	875.615	116.003	1239.63	128.492	83.3539	752.992	59.4792	1422.31	105.767	1508.04	696.349	70.8977	926.037	114.63	1463.36	211.812	1337.75	145.321
909	Cmtm6	3824.79	1.4292	0.100107	14.2768	3.0519e-46	6.37374e-45	2544.76	5724.04	2197.77	7006.15	1536.52	5581.77	5511.79	2130.85	4909.5	2052.67	4536.27	1755.56	2518.71	5708.66	1983.26	4628.52	1907.71	5386.03	2092.75	6782.42
910	Lif	42.7946	5.15609	0.361476	14.264	3.6676e-46	7.65118e-45	0	87.9003	0.581179	50.1467	6.40436	100.677	72.2931	4.40906	82.4265	0	65.5415	2.04986	2.46564	87.1464	0	96.479	2.07276	39.3272	3.04939	152.923
911	Hadh	358.254	-1.62335	0.113872	-14.2559	4.11723e-46	8.57975e-45	591.71	121.826	590.399	145.52	430.972	176.69	175.983	491.14	143.776	597.043	136.928	499.669	516.66	215.859	524.834	171.364	577.433	248.771	609.449	199.056
912	Med1	1088.98	1.06736	0.0749508	14.2408	5.1136e-46	1.06444e-44	619.005	1729.75	648.869	1488.09	720.988	1601.46	1675.8	640.794	1271.54	702.719	1423.25	874.016	686.084	1388.11	687.704	1367.21	683.949	1414	752.871	1403.33
913	Tfg	1421.26	0.86468	0.0607288	14.2384	5.29482e-46	1.10095e-44	1034.88	1674.11	980.517	1990.78	995.059	1656.1	1890.2	979.504	1864.12	833.767	1677.69	1143.88	982.169	1984.18	1021.19	1834.79	1036.29	1784.55	1074.28	1987.06
914	Ttc39b	285.055	2.2294	0.156726	14.2248	6.42912e-46	1.33534e-44	127.236	691.026	107.758	648.785	129.609	351.017	297.141	98.2028	477.028	77.8418	427.003	114.78	97.4256	608.767	88.6378	400.964	82.7687	369.428	71.0798	434.595
915	Slc23a2	2714.56	1.4163	0.099584	14.2222	6.67103e-46	1.38408e-44	1340.65	4275.65	1579.37	4483.2	1100.58	3289.75	3767.53	1316.6	4113.46	1657.39	3428.43	1677.12	1461.52	3676.68	1219.28	3276.43	1774.29	4689.94	1666.21	4497.15
916	Rffl	949.255	3.53169	0.248367	14.2196	6.92077e-46	1.43432e-44	292.112	1826.58	173.019	1818.49	69.6608	1047.35	2059.47	194.856	1943.32	117.094	1828.57	43.1244	243.977	2122.77	76.9406	1661.03	106.317	1443.56	199.758	1717.11
917	Setdb1	428.517	-1.20645	0.084963	-14.1997	9.19709e-46	1.90401e-44	647.591	280.722	587.168	241.837	490.627	326.354	219.142	640.758	264.562	574.964	224.639	610.451	606.892	297.879	526.529	253.625	642.752	229.649	647.291	256.917
918	Nav2	373.453	-2.73758	0.192832	-14.1967	9.60728e-46	1.98676e-44	800.877	40.2671	655.709	86.1837	617.495	233.326	85.2081	729.35	82.8675	645.753	121.518	711.36	617.272	69.9485	515.334	58.7254	670.932	81.162	536.058	109.711
919	Mettl7a1	143.573	-2.07794	0.146404	-14.1931	1.0103e-45	2.08699e-44	252.678	21.8173	262.732	38.6212	165.789	47.5005	82.6226	233.986	46.9905	219.271	49.772	218.698	266.413	58.4886	253.844	69.997	212.409	70.0795	253.579	46.1703
920	Cacybp	1720.37	1.41087	0.0994301	14.1896	1.06318e-45	2.19385e-44	850.829	2721.5	857.232	2674.18	1024.14	2063.19	3245.79	759.577	2584.17	845.349	2143.69	1286.94	923.512	2616.62	925.777	2443.29	984.172	2464.2	942.531	2050.81
921	Zmynd15	390.355	1.91904	0.135305	14.1831	1.16661e-45	2.40465e-44	215.369	677.023	189.426	607.261	131.874	586.218	567.051	149.17	582.055	116.605	847.28	144.728	208.122	525.383	150.968	427.803	137.988	525.194	183.246	834.34
922	Ypel3	91.0164	-5.40653	0.381312	-14.1788	1.24031e-45	2.55381e-44	295.801	5.42256	198.158	0	112.172	6.76348	5.25725	225.682	6.77778	154.353	0	68.667	257.014	6.17259	218.175	5.16699	120.051	0	131.368	3.32541
923	Jmjd1c	888.387	-1.5349	0.10831	-14.1714	1.37808e-45	2.83439e-44	1114.7	443.263	1362.86	438.891	1153.27	489.689	328.879	1382.98	487.777	1025.31	408.474	1637.63	1135.58	564.157	1303.74	524.071	1657.52	451.405	1445.34	412.201
924	Prkacb	1078.83	-1.33587	0.0942816	-14.1689	1.42631e-45	2.93041e-44	1589.36	711.967	1606.75	510.918	1699.15	639.521	607.041	1409.29	656.208	1116.96	685.272	1991.1	1512.49	566.223	1301.25	547.202	1537.59	624.113	1668.87	595.271
925	Ndufaf7	111.721	-2.62566	0.185326	-14.1678	1.44913e-45	2.97409e-44	180.948	39.3251	216.931	35.6488	176.778	67.0455	41.2892	159.293	19.8141	183.41	11.5288	212.117	202.529	26.6947	176.615	20.916	217.889	27.2708	196.647	21.7339
926	Mfsd11	1367.83	-1.57727	0.111358	-14.164	1.5299e-45	3.13646e-44	2490.39	716.95	1996.36	547.871	1769.08	532.659	975.149	1966.17	610.356	1860.49	860.435	2199.17	2447.42	556.991	1774.69	711.722	1914.3	756.807	2050.76	618.832
927	Cul1	2565.45	1.68556	0.119144	14.1473	1.94159e-45	3.97617e-44	1153.86	3649.97	1209.58	4187.18	875.822	2333.2	4863	1030.21	3852.44	1310.85	3670.06	1250.77	1122.31	3883.26	1206.78	3892.15	1674.03	4735.9	1335.75	4071.82
928	Mllt6	425.723	2.21642	0.156697	14.1446	2.01693e-45	4.12602e-44	206.258	952.997	196.009	797.939	86.804	523.339	576.984	189.767	845.437	130.183	595.28	122.345	181.714	859.529	113.924	567.362	141.657	564.49	138.064	724.374
929	Src	253.674	3.367	0.238524	14.116	3.02658e-45	6.18479e-44	51.4618	646.906	16.9493	490.837	61.4802	248.101	559.601	44.6177	507.244	18.6034	323.099	76.0717	57.6201	451.356	37.2034	326.439	56.5991	460.474	22.7739	616.051
930	Marcksl1	5659.35	5.25749	0.372831	14.1016	3.71478e-45	7.58294e-44	136.384	6684.96	144.618	12359.2	1059.76	7735.32	5581.6	167.33	12572.7	288.248	10153.4	212.363	264.765	23954.9	200.949	12931	277.393	6176.6	130.116	12155.4
931	Skp2	125.609	-2.24601	0.159301	-14.0992	3.8419e-45	7.83402e-44	162.945	26.3526	207.219	54.5722	185.91	38.4399	26.4518	164.729	45.7266	258.774	47.2848	225.504	215.566	44.5975	202.94	29.8129	196.037	69.8226	257.26	52.2263
932	Ranbp2	1432.89	1.40445	0.0996707	14.0909	4.32007e-45	8.79959e-44	656.186	2038.16	814.757	2614.87	673.98	2592.38	2128.42	699.007	1880.65	870.998	1617.35	908.511	632.471	2078.09	839.834	1876.08	937.953	1876.91	823.064	2098.06
933	Zfp800	403.691	2.20586	0.156688	14.0781	5.17804e-45	1.05359e-43	177.013	639.897	129.716	886.577	143.262	579.753	980.791	167.622	755.675	85.9332	352.242	131.199	118.26	537.326	173.958	553.468	159.4	619.829	155.489	726.411
934	Ube2z	462.168	1.33645	0.0949398	14.0768	5.27268e-45	1.0717e-43	258.683	711.609	268.771	693.795	215.837	582.709	655.018	241.056	803.293	298.553	576.984	205.008	274.874	729.284	319.332	616.929	282.004	555.264	270.838	683.525
935	Aldh9a1	1250.03	-1.52278	0.108206	-14.073	5.56416e-45	1.12973e-43	1742.92	341.769	2132.99	623.509	1649.42	794.825	800.747	1811.33	565.911	2026.17	707.47	1664.9	2080.93	588.179	1748.59	577.563	1860.52	725.453	1846.79	710.553
936	Zfp719	174.546	1.81398	0.128948	14.0675	6.0127e-45	1.2195e-43	88.8652	302.24	79.5136	237.644	89.476	250.838	271.369	110.495	312.984	71.6469	322.242	77.3597	46.2552	262.307	77.58	211.923	67.1363	295.131	58.5557	257.358
937	Rbpms	173.367	3.33641	0.237232	14.0639	6.3325e-45	1.28299e-43	41.1195	626.88	27.3198	218.88	20.1118	207.701	256.245	59.4337	336.34	35.0514	384.96	22.9176	17.9424	288.175	33.3731	274.875	38.2318	246.107	10.9646	320.71
938	Plau	416.989	-2.8181	0.200405	-14.0621	6.49714e-45	1.31494e-43	585.079	91.4536	590.557	75.7611	906.774	99.4817	138.793	467.127	71.0263	730.657	125.676	1557.26	627.806	87.7636	432.275	113.709	723.078	116.691	676.656	122.161
939	Mccc2	98.368	-2.00947	0.143001	-14.0521	7.47462e-45	1.51116e-43	160.499	26.1552	141.612	38.6223	144.273	51.5945	50.1828	169.707	28.3413	142.267	22.9107	164.98	182.377	38.1515	154.64	29.231	136.929	50.5896	182.706	51.5907
940	Dnajb14	461.299	-1.44557	0.102931	-14.0441	8.37545e-45	1.69148e-43	776.869	282.765	789.684	248.477	581.949	215.14	227.745	820.184	246.018	504.455	242.888	530.27	675.626	242.923	686.034	276.093	632.727	266.684	748.142	231.314
941	Abcd1	877.62	-1.40649	0.100196	-14.0374	9.20664e-45	1.85737e-43	1656.32	444.471	1309.39	492.517	882.152	481.598	463.272	1221.46	462.343	1257.97	546.466	1082.43	1526.95	445.855	1254.52	413.446	1265.52	477.311	1278.23	590.174
942	Gatsl2	101.125	-3.26993	0.233007	-14.0336	9.70408e-45	1.95565e-43	137.674	4.26492	185.798	23.4153	292.817	19.9084	27.6952	145.536	9.54076	188.58	33.2405	133.088	161.377	11.2873	187.318	26.6011	232.206	26.7462	170.072	5.34086
943	Fcrl1	102.363	-2.58503	0.184442	-14.0154	1.25494e-44	2.52639e-43	161.396	24.4515	164.223	9.33807	183.53	59.5627	21.2016	147.223	28.9036	159.826	38.8522	199.086	205.126	24.6016	177.943	20.9496	199.209	32.4476	152.793	36.589
944	Creg2	165.626	-2.46002	0.175616	-14.008	1.39307e-44	2.79893e-43	318.902	43.3201	338.075	41.5994	191.564	82.0756	48.8239	276.675	37.9745	262.293	78.8496	254.066	328.851	36.92	275.701	25.977	287.311	49.4692	252.731	81.3409
945	Spata2l	50.0242	-3.05993	0.218442	-14.008	1.39327e-44	2.79893e-43	92.0542	13.71	97.1283	10.7794	64.4159	15.3196	3.09951	110.329	14.5516	91.5226	3.9954	87.1972	104.031	8.00988	66.9865	9.85281	83.6096	10.578	101.919	11.396
946	Ttc5	274.072	-1.70073	0.121528	-13.9946	1.68184e-44	3.37505e-43	405.713	78.5958	383.248	86.1532	364.671	130.388	153.401	391.365	128.959	488.179	164.936	380.296	445.984	115.692	449.835	117.069	471.914	189.86	423.82	111.369
947	Lpcat2	2129.82	1.79264	0.128148	13.9888	1.82483e-44	3.65814e-43	1281.58	3886.73	879.33	3026.01	589.251	3283.56	3349.74	1065.96	3218.7	1043.23	2992.77	600.191	1081.3	3740.91	1152.64	3004.17	1096.95	3486.51	758.02	3058.92
948	Ifi44	114.686	3.71229	0.265404	13.9873	1.86352e-44	3.73176e-43	4.78079	276.668	33.4934	303.014	26.3463	327.179	252.03	12.7066	221.998	8.91183	121.279	19.857	14.8384	193.68	19.6302	156.659	9.71447	159.052	13.5954	118.289
949	Siva1	202.236	-3.20851	0.22939	-13.9871	1.86772e-44	3.73622e-43	305.556	16.4783	244.951	24.8291	450.329	19.989	83.4983	279.288	53.0274	494.323	59.4096	536.222	328.064	45.9319	310.961	25.5212	361.404	23.6854	333.671	47.5756
950	H2-K1	20669.3	1.67394	0.11969	13.9856	1.90733e-44	3.81145e-43	11395	32449.1	9093.1	35195.4	7032.77	25526.3	30382.4	9864.37	34685.3	9288.82	28097.5	8297.53	12332.4	35309.1	14544.5	30069.4	8291.33	25262.5	8511.52	37757.8
951	Irgm2	978.857	3.47268	0.248327	13.9843	1.94335e-44	3.87933e-43	183.86	1446.11	97.0284	2194.39	134.465	2159.04	2195.07	115.016	1566.49	62.3999	1398.28	147.609	184.039	2017.16	483.453	1498.86	94.9871	1558.58	122.297	1918
952	Vimp	777.695	0.876258	0.0626789	13.9801	2.06159e-44	4.11105e-43	519.43	1087.01	603.105	1032.07	479.14	917.06	989.603	537.291	1045.36	538.23	823.087	555.828	518.964	1073.98	570.787	1092.4	583.22	1048.55	591.862	946.918
953	Eif1a	1631.08	1.13058	0.0809134	13.9728	2.28611e-44	4.55399e-43	978.299	2496.43	936.371	2086.19	1071.59	2019.27	1918.36	870.158	2318.5	921.24	1853.46	1239.54	1079.66	2443.82	1019.92	2560.92	1050.15	2118.05	1054.67	2584.92
954	Traf2	608.5	1.45019	0.103856	13.9635	2.60435e-44	5.18248e-43	348.889	751.098	268.342	1058.44	248.479	711.351	892.014	295.669	924.891	407.363	873.525	365.945	397.059	1006.96	289.468	775.059	310.365	873.641	336.277	1035.16
955	Dlgap4	782.419	1.36202	0.0977241	13.9374	3.75212e-44	7.45867e-43	512.164	1264.32	515.521	1139.69	362.978	1010.45	1193.23	425.656	1056.12	428.715	1192.5	381.357	594.58	1085.09	451.391	1104.22	348.735	986.049	361.861	1233.75
956	Ivns1abp	555.204	-1.6132	0.115783	-13.933	3.99362e-44	7.93042e-43	873.346	313.87	764.699	197.348	847.664	203.083	203.671	845.78	307.724	830.365	361.535	960.474	796.656	362.793	681.437	249.265	893.803	317.814	858.688	234.072
957	Trim65	205.708	-1.52949	0.109799	-13.9299	4.16926e-44	8.27056e-43	362.068	109.91	327.046	100.136	297.231	106.272	102.135	321.946	121.575	307.329	109.676	246.515	290.34	139.542	330.467	93.4276	262.702	98.1365	321.285	66.4199
958	Apool	569.52	1.41835	0.101939	13.9137	5.23239e-44	1.03686e-42	303.239	821.713	353.164	755.111	251.996	666.046	1032.39	303.63	760.844	307.591	844.382	269.182	315.287	753.124	422.917	1039.04	277.049	818.015	305.559	790.115
959	Ctns	370.913	-2.10272	0.15131	-13.8968	6.62373e-44	1.31121e-42	771.39	86.3653	656.167	136.366	415.425	94.8355	162.296	634.602	138.685	501.81	179.679	402.016	800.726	149.898	606.366	163.62	583.421	176.941	653.959	103.692
960	Bckdk	813.351	-1.0651	0.0767141	-13.884	7.9148e-44	1.56515e-42	1003.63	524.452	968.9	530.541	1060.49	470.525	508.876	939.384	495.933	1175.7	553.516	1336.64	1208.44	537.056	1072.59	486.01	1143.97	617.698	1088.39	544.291
961	Ppa1	492.426	2.39076	0.172286	13.8767	8.77298e-44	1.73125e-42	77.6152	714.9	96.8606	829.227	160.763	843.123	887.29	123	776.003	156.035	803.398	291.192	121.765	835.498	197.571	958.159	206.378	750.045	139.32	880.37
962	Zdhhc5	639.813	1.61142	0.116124	13.8767	8.77172e-44	1.73125e-42	280.066	1213.73	290.1	886.43	189.795	766.846	919.702	309.077	1071.63	402.605	940.571	317.415	308.378	993.743	323.02	848.005	343.345	864.735	389.775	1137.29
963	Adam17	4849.72	1.06751	0.0769565	13.8717	9.40648e-44	1.85434e-42	3712.57	7616.25	3205.25	6355.78	2526.3	5582.63	6726.15	3367.19	6544.49	2652.21	6720.83	3377.6	3598.13	7073.3	2929.77	5999.34	2943.52	6691.73	3007.77	6363.58
964	Hmbs	360.018	-1.78717	0.128947	-13.8598	1.10976e-43	2.18545e-42	485.593	161.873	479.043	105.456	557.767	182.114	204.868	391.088	148.855	678.283	134.967	767.929	591.899	163.943	552	158.064	568.074	191.982	516.229	160.332
965	Dtwd1	190.87	1.55214	0.112005	13.8578	1.14195e-43	2.24651e-42	84.5908	307.643	82.7039	284.437	102.343	242.401	279.017	91.3438	289.58	73.4527	276.528	122.817	129.831	278.366	108.698	343.59	82.4481	307.366	95.1736	235.075
966	Hk2	528.459	2.11558	0.152735	13.8513	1.24911e-43	2.45477e-42	216.001	1107.98	227.212	752.671	264.354	640.422	859.464	147.643	955.506	184.7	813.04	156.88	252.597	1071.85	215.984	1097.29	142.918	479.029	178.789	804.856
967	Sertad2	515.173	1.62664	0.117467	13.8476	1.31548e-43	2.58252e-42	280.744	814.874	224.939	857.984	305.889	713.557	699.663	239.729	764.69	296.996	701.27	316.233	194.914	879.133	210.082	729.234	245.879	575.079	194.76	1057.8
968	Kif11	312.721	-3.13279	0.226301	-13.8435	1.39322e-43	2.73233e-42	271.212	17.3421	542.365	90.6258	526.972	69.8123	50.2879	458.389	41.0847	668.45	63.9689	768.725	336.386	48.3712	476.973	79.0181	907.721	104.799	666.83	65.0852
969	Helb	137.302	-1.88905	0.136519	-13.8372	1.51923e-43	2.97637e-42	177.813	40.8935	207.031	47.1772	211.298	95.8996	61.2152	201.914	60.3594	237.038	29.1476	261.242	207.58	58.4408	197.57	52.9658	257.065	62.4815	215.975	62.9309
970	Ccdc23	334.923	1.60902	0.116292	13.8361	1.54452e-43	3.02279e-42	176.942	510.337	136.812	616.206	174.552	610.666	573.279	180.934	428.893	169.988	335.984	157.646	169.69	552.646	199.242	484.631	142.721	355.488	151.082	570.72
971	Clcn3	422.477	-1.09746	0.079349	-13.8308	1.66223e-43	3.24981e-42	563.985	230.911	544.374	255.613	509.237	281.876	250.863	528.834	262.267	547.452	272.152	566.202	578.975	246.006	612.113	264.912	674.061	333.174	646.869	279.663
972	Hnrnph2	2052.61	0.869304	0.0628811	13.8246	1.81186e-43	3.53872e-42	1438.19	2777.46	1568.4	2816.56	1327.23	2424.65	2989.01	1438.05	2708.22	1328.6	2249.42	1489.41	1442.74	3036.16	1536.46	2548.1	1460.71	2306.41	1497.53	2668.89
973	Triap1	471.216	-1.13312	0.08199	-13.8202	1.92402e-43	3.75391e-42	681.472	344.101	648.854	227.179	578.001	267.853	273.234	597.338	298.44	705.039	374.875	650.131	724.83	252.508	662.743	304.402	604.972	323.822	591.446	313.081
974	Gm21748	773.284	2.89912	0.209916	13.8109	2.19183e-43	4.27204e-42	161.32	1502.57	130.202	2197.93	208.031	1440.47	595.472	194.403	1678.8	276.892	921.289	154.776	96.5699	1143.9	177.795	977.823	215.391	958.383	212.023	2221.63
975	Dda1	1373.28	1.19187	0.0863354	13.8051	2.37437e-43	4.62308e-42	821.008	2083.3	744.687	2049.78	661.08	1470.64	1755.08	763.943	1913.76	1046.32	1895.92	806.076	944.082	2113.77	847.435	1861.41	883.887	1772.38	843.226	2187.9
976	Ptbp3	2799.16	1.10454	0.0800281	13.802	2.48009e-43	4.82398e-42	1949.37	4035.78	1705.06	4262.88	1829.92	4469.85	4007.1	1741.44	3662.56	1697.81	3002.3	1767.26	1679.87	3858.49	1550.96	3278.58	1824.53	3194.11	2017.09	4448.23
977	Slamf9	2094.72	3.13531	0.227177	13.8012	2.50789e-43	4.87306e-42	198.963	3354.75	253.063	3978.62	557.777	6445.86	2978.82	213.194	3095.12	555.357	3509.61	806.678	232.484	3290.61	577.372	3299.04	545.548	3376.69	335.898	4288.99
978	Iigp1	225.436	7.0062	0.507744	13.7987	2.59572e-43	5.03857e-42	2.68135	264.216	0	570.48	9.60509	712.168	883.747	2.49123	413.561	0	223.615	3.87599	3.91375	398.078	12.3207	328.657	0.817432	315.416	0	363.083
979	Gcnt1	213.552	-3.40236	0.246685	-13.7923	2.83472e-43	5.49686e-42	329.931	32.02	361.041	37.88	461.387	109.888	36.2513	378.264	16.035	321.083	17.0981	535.664	310	23.1289	385.843	27.6507	459.279	28.9716	348.148	51.4737
980	Ddx26b	328.746	-2.34522	0.170048	-13.7915	2.86676e-43	5.55332e-42	541.054	91.4732	663.118	68.1029	459.044	70.9045	111.335	527.046	80.2194	492.009	155.926	574.481	681.516	92.6419	411.252	169.621	502.011	167.666	637.422	78.0815
981	Asb6	806.795	1.19666	0.0867899	13.788	3.00804e-43	5.82107e-42	576.253	1142.75	495.477	1201.13	433.874	914.431	1017.69	463.806	1115.65	564.242	1373.53	438.31	512.101	1075.52	445.259	1038.38	508.462	980.852	450.576	1387.62
982	Eef1e1	506.987	1.73814	0.126106	13.7831	3.22069e-43	6.22624e-42	216.755	844.213	224.172	753.169	290.335	688.5	803.466	192.871	798.182	197.938	615.683	362.028	159.568	898.108	225.702	849.724	268	843.761	191.001	716.553
983	Lix1	206.64	3.62506	0.263167	13.7748	3.61469e-43	6.9808e-42	11.2047	274.706	29.3147	186.923	46.1284	183.503	305.385	26.7149	455.408	29.8851	619.271	31.4826	22.8846	457.333	30.0742	587.345	57.6819	543.805	20.9503	212.803
984	Fam219b	218.451	-1.60214	0.116371	-13.7675	3.99649e-43	7.7103e-42	380.053	60.7502	321.066	105.311	360.264	102.532	78.6557	305.153	124.702	373.972	128.846	287.32	325.586	113.065	320.323	115.438	350.917	147.694	285.625	81.7552
985	1600014C10Rik	627.994	2.15856	0.15693	13.7549	4.76093e-43	9.17579e-42	308.635	757.365	214.631	1051.94	134.489	913.29	1458	226.4	1142.9	247.213	1030.28	170.539	352.288	1266.8	272.831	839.442	193.313	784.205	190.561	1004.74
986	Ppm1k	354.433	2.14064	0.155665	13.7516	4.98468e-43	9.59728e-42	156.325	641.324	165.12	692.329	81.3812	658.776	581.384	162.45	476.274	87.7667	571.163	72.0874	142.012	530.857	186.64	497.828	118.698	575.281	143.234	547.733
987	Ap1b1	1252.36	-1.17138	0.085205	-13.7478	5.24837e-43	1.00947e-41	1861.12	639.554	1895.38	775.637	1744.24	875.293	700.916	1622.07	788.467	1550.9	773.685	1769.67	2269.2	739.775	1446.92	719.623	1475.41	778.107	1719.45	901.762
988	Abcc5	1723.38	1.33379	0.0970321	13.7459	5.39043e-43	1.03575e-41	1274.64	2589.67	1071.03	2524.75	876.565	2327.95	3335.95	1083.43	2331.69	785.103	2181.32	882.777	1028.44	2501.43	1065.91	2148.17	910.967	2289.46	814.253	2444.14
989	Whsc1l1	926.7	1.21248	0.0883546	13.7229	7.40297e-43	1.42101e-41	570.773	988.169	528.694	1673.88	567.588	1514.01	1276.65	548.439	1237.2	481.612	1067.89	573.671	522.623	1433.71	559.09	1199.33	621.48	1155.77	622.975	1390.43
990	P2rx7	374.138	-2.41462	0.176039	-13.7164	8.10334e-43	1.55388e-41	808.721	93.7046	607.528	161.024	456.76	84.9953	168.756	650.172	87.069	590.116	70.5109	477.862	814.58	67.3352	689.845	154.318	582.661	120.263	610.705	185.827
991	Rcl1	364.861	1.86457	0.135963	13.7138	8.3952e-43	1.60822e-41	194.088	554.692	143.416	629.804	140.885	431.67	668.108	94.0695	598.234	206.147	621.858	203.027	165.626	650.891	108.848	492.421	137.701	499.543	177.583	578.613
992	Tmem141	238.844	-1.88643	0.137703	-13.6992	1.02587e-42	1.96322e-41	417.91	90.8826	413.097	100.487	224.658	74.8374	116.219	341.045	105.847	359.594	98.1846	355.6	510.555	128.956	408.258	122.068	348.25	89.3101	391.402	79.7237
993	Nckipsd	243.705	-2.01455	0.147087	-13.6963	1.06798e-42	2.04175e-41	493.99	140.449	391.803	90.2063	294.995	101.904	87.545	398.26	74.3445	352.405	124.223	272.592	514.644	93.7507	363.331	63.8868	434.302	120.806	367.171	93.4952
994	E2f2	64.5146	-6.24689	0.456391	-13.6876	1.20465e-42	2.30071e-41	75.6909	0	134.101	1.40801	136.608	1.27214	1.40171	101.004	1.46936	205.126	14.2673	140.557	76.3647	0	106.165	0.985415	202.52	0.919669	87.8601	2.57017
995	2810006K23Rik	85.7595	-1.83114	0.133852	-13.6803	1.33097e-42	2.5394e-41	127.855	34.9322	151.261	43.0202	123.881	51.4511	35.3376	132.02	30.741	150.118	30.7548	144.542	118.359	43.2026	140.329	28.2135	137.98	43.8159	111.993	35.3841
996	Ets2	4289.82	2.5954	0.18972	13.6802	1.33368e-42	2.54203e-41	808.369	7138.74	626.73	7364.31	1297.74	7498.82	6796.75	747.122	7502.88	2113.73	7341.27	1698.84	750.418	7160.31	1184.63	7463.2	2047.45	7474.21	901.094	7879.77
997	Ube2m	214.869	2.07954	0.152216	13.6618	1.7174e-42	3.27012e-41	70.9617	308.509	70.4694	433.92	76.2382	300.839	380.972	73.1114	390.796	114.874	261.666	74.5206	89.5534	363.578	105.349	392.953	75.1688	175.925	79.3056	458.675
998	Pdk2	84.1979	-4.4119	0.323245	-13.6488	2.05291e-42	3.90506e-41	230.651	7.19472	188.353	5.23449	82.4683	5.18365	7.56113	210.842	3.84619	151.443	0	72.7409	260.056	10.5018	160.556	14.3829	104.932	9.96576	149.078	8.96703
999	Eps8	43.9378	-4.54161	0.332764	-13.6481	2.07078e-42	3.9351e-41	65.935	0	111.279	10.1522	71.1947	3.9389	2.76523	54.6039	2.71029	77.494	5.33842	82.5545	79.7697	0	119.817	10.2056	72.3804	0.714975	101.909	5.99238
1000	Wdr43	688.607	1.69919	0.124527	13.6452	2.15741e-42	4.09562e-41	281.231	1185.49	331.443	1078.56	282.745	975.81	1011.06	279.242	934.169	208.935	952.322	447.517	287.541	1238.22	277.277	915.007	445.249	1199.31	391.119	1049.89
1001	Bcl10	1269.57	1.19874	0.0878902	13.6391	2.34423e-42	4.44584e-41	933.187	2015.88	832.788	1934.03	609.554	1444.88	1746.89	773.415	1916.5	625.53	1531.37	716.243	857.883	1964.46	714.381	1650.65	829.042	1660.48	814.614	1819.65
1002	Ube2e1	1015.88	1.21003	0.0887309	13.6371	2.40852e-42	4.56322e-41	599.845	1727.62	667.495	1641.83	633.591	1222.71	1600.33	582.396	1492.33	500.548	1028.72	647.163	605.866	1549.38	611.958	1341.94	694.175	1246.03	584.539	1339.15
1003	Adrm1	1201.85	1.28385	0.0941498	13.6362	2.43857e-42	4.61553e-41	780.666	1759.59	566.84	1725.64	654.753	1456.5	1631.83	535.726	1853.55	858.087	1507.9	842.423	692.223	2069.24	672.752	1628.01	764.049	1593.34	631.268	1812.51
1004	Lgals8	2127.37	1.37668	0.100972	13.6342	2.50591e-42	4.73826e-41	1380.73	2917.65	1204.53	3176.44	908.529	2911.22	3677.38	1263.01	2789.95	902.277	2821.59	1020.01	1407.77	3160.25	1507.62	3189.37	984.543	2685.06	1262.3	3377.11
1005	Vcam1	65.0268	5.70769	0.418737	13.6307	2.62929e-42	4.96661e-41	0	164.924	0	114.334	9.40163	157.666	264.457	0.974138	74.8029	0.944894	67.9823	3.10076	0	119.561	2.40982	106.121	3.86604	67.9412	1.05367	140.997
1006	Gm10307	43.7767	-3.38745	0.248586	-13.6269	2.7718e-42	5.2306e-41	79.9089	0	68.7591	0	99.4759	6.54045	11.7981	71.7763	8.9504	66.7104	23.2211	81.4863	99.3322	6.35946	81.2277	4.19424	69.5009	13.6629	82.6291	0
1007	Lancl2	645.228	1.60544	0.117829	13.6252	2.83721e-42	5.34873e-41	308.901	807	320.5	1051.47	218.99	915.639	1334.47	326.282	930.711	256.708	890.96	262.484	362.521	909.601	421.975	791.128	346.715	1024.5	378.063	1045.95
1008	Eif4e2	1348	1.03974	0.0763747	13.6137	3.31981e-42	6.25231e-41	844.378	1805.82	855.732	2161.22	709.261	1619.16	1728.38	742.099	1884.64	980.995	1531.67	908.289	979.84	1948.64	926.431	1831.88	949.771	1829.24	943.492	1779.12
1009	Cst7	808.328	2.9071	0.213651	13.6068	3.65014e-42	6.86762e-41	141.473	1110.61	129.53	1542.45	188.858	1331.12	3252.05	133.868	1244.1	196.89	736.182	278.451	199.877	1325.23	314.33	1308.07	177.246	996.341	143.553	1416.33
1010	Cct3	3308.82	1.32573	0.0975079	13.5961	4.22296e-42	7.9375e-41	1523.34	4861.9	1591.29	4348.07	1899.11	4201.19	4901.9	1415.96	4636.04	2189.71	5032.09	2693.04	1788.19	4921.53	1785.56	4786.22	2136.17	4737.37	1837.88	4889.75
1011	Glipr1	8918.84	0.949482	0.0698836	13.5866	4.80849e-42	9.02912e-41	5173.41	11424.7	5773.69	13431.5	6454.24	9829.17	11445.7	5730.38	12448.9	6487.08	10670.9	6541.03	5601.7	10918.5	6719.83	13124.6	6744.81	12525.4	5635.36	11695.9
1012	Ezr	1015.68	2.4752	0.182212	13.5841	4.97355e-42	9.32982e-41	294.443	2234.94	314.456	1283.7	183.918	695.088	1541.35	270.893	1928.18	468.943	2279.67	272.7	265.874	1645.05	270.35	1961.54	362.796	2267.59	392.09	1379.93
1013	Slc12a4	1177.64	1.52066	0.111951	13.5833	5.03378e-42	9.43349e-41	562.327	2117.79	504.951	1765.1	629.961	1682.9	1412.54	556.092	1849.51	686.822	1568.27	836.707	578.046	2084.37	422.671	1523.2	700.982	1498.83	594.65	1977.12
1014	Snx18	389.204	1.88722	0.138946	13.5824	5.09489e-42	9.5386e-41	211.448	503.087	136.194	557.122	197.598	571.411	519.084	143.108	742.314	173.77	640.255	124.347	116.372	888.452	138.54	559.504	232.603	580.367	184.381	564.115
1015	Epha4	110.784	3.89221	0.286641	13.5787	5.35773e-42	1.00208e-40	18.9527	256.253	5.90389	128.116	36.942	150.788	396.536	17.5407	197.501	6.33025	195.348	8.28703	7.87758	176.623	7.26901	177.365	21.9053	225.765	12.4088	167.977
1016	Frmd6	350.88	2.75445	0.20292	13.574	5.70833e-42	1.0666e-40	56.1649	732.801	62.6733	674.492	109.044	421.407	641.878	55.4806	708.935	96.3129	602.274	203.586	53.7157	624.993	68.6603	582.297	105.775	503.649	84.2807	629.176
1017	Gm10053	2033.12	2.12797	0.156832	13.5685	6.16006e-42	1.14988e-40	446.925	3185.48	548.035	3873.74	932.19	3596.34	3438.24	502.672	3134.2	818.052	2482.2	1275.57	557.737	3708.63	827.856	3780.72	902.027	2901.18	755.25	2995.45
1018	Pald1	70.1859	-4.36293	0.321619	-13.5655	6.41067e-42	1.19548e-40	78.9665	0	74.7422	10.4019	172.168	6.70515	2.95821	79.3718	3.10189	222.014	7.53743	207.689	106.156	6.36549	125.328	7.28231	159.968	8.73725	110.662	13.564
1019	Tpm3	8684.39	0.921586	0.0679435	13.564	6.54604e-42	1.21953e-40	5427.32	12070.2	5595.56	11968.8	6483.8	11780.1	11427.1	4976.32	11453.2	5865.9	10104.3	7187.97	5368.34	12395.2	6370.85	10660	6579.69	10659.6	6149.98	11163.5
1020	Ankfy1	2474.94	1.07238	0.0791841	13.5428	8.73578e-42	1.62588e-40	1658.12	3770.04	1430.97	3278.48	1415.14	2981.86	3467.62	1461.35	3129.62	1709	3457.71	2111.06	1447.98	3517.73	1666.73	2855.63	1557.22	3441.18	1473.83	3667.54
1021	Srfbp1	264.843	1.4388	0.106247	13.542	8.8336e-42	1.64248e-40	149.511	391.519	151.257	444.18	124.44	409.735	403.26	128.868	384.502	109.831	315.168	176.459	169.809	433.813	129.122	298.113	145.182	331.427	139.273	461.383
1022	Setd5	943.909	1.22855	0.0907275	13.5411	8.94355e-42	1.66129e-40	633.709	1524.75	578.747	1446.91	536.849	1091.85	1320.77	562.339	1398.11	456.567	1282.74	688.118	473.055	1302.95	558.544	1436.69	671.467	1339.14	476.576	1098.3
1023	Slc5a3	268.174	-2.51123	0.185517	-13.5364	9.53695e-42	1.76979e-40	402.081	116.812	320.6	62.4006	378.268	122.877	62.1703	587.162	70.4956	350.598	67.3503	820.82	403.343	85.3168	528.139	83.0444	443.194	80.4582	324.14	54.2103
1024	Mgat5	856.038	-1.6644	0.123025	-13.529	1.0542e-41	1.95439e-40	1776.68	416.94	1167.25	330.756	838.445	307.11	405.366	1146.88	384.8	1503.92	591.202	1164.79	1445.95	397.913	1271.85	425.483	1401.89	442.572	1273.01	427.961
1025	Aoah	2283.46	1.69041	0.125057	13.5171	1.23954e-41	2.29576e-40	1505.95	3968.91	1064.83	3904.1	797.667	2707.07	3883	1186.37	3500.88	893.26	3198.68	760.432	1357.71	3327.17	1425.81	3569.19	943.038	3463.74	876.496	3334.97
1026	Il10ra	1991.5	1.65653	0.122577	13.5143	1.28833e-41	2.38378e-40	1227.82	3267.8	978.212	3349.31	642.35	2613.87	2605.54	1078.48	3045.27	933.425	3141.62	636.064	1298.7	3236.34	1032.85	2638.72	898.476	2628.59	870.343	3706.15
1027	Prkra	172.19	-1.54318	0.114191	-13.5141	1.29208e-41	2.3884e-40	291.062	114.051	257.291	78.1139	208.947	94.7517	74.5109	288.897	91.7352	229.825	41.2279	245.996	309.383	91.4287	255.172	95.6528	233.236	108.315	257.591	76.6126
1028	Rps6ka3	561.214	2.21075	0.163685	13.5062	1.43839e-41	2.65626e-40	203.442	1016.37	178.512	919.368	115.275	1598.46	1140.83	190.588	806.447	169.759	648.272	214.529	240.647	972.858	267.192	716.279	227.896	797.289	189.349	610.926
1029	Nub1	1405.01	1.35887	0.100646	13.5015	1.53205e-41	2.82647e-40	1062.33	1876.55	789.435	2246.24	630.177	2094.16	2103.15	814.09	1890.63	713.028	1876.03	615.8	882.921	2156.9	854.889	1498.31	780.824	2031.86	746.505	2436.36
1030	Adora2b	642.178	4.8873	0.36225	13.4915	1.75492e-41	3.23451e-40	16.5423	1074.12	34.3477	1011.56	75.1448	1189.37	2118.13	23.021	1612.37	38.9397	1085.44	129.99	17.8396	1589.18	15.7198	1217.71	36.8954	502.393	25.3655	1029.48
1031	Gdf15	577.908	3.36845	0.24982	13.4835	1.95505e-41	3.59986e-40	101.595	1214.97	81.8089	917.888	88.1143	149.788	697.264	71.0613	1632.9	169.835	1265.73	113.401	75.9353	976.847	104.025	1291.9	120.042	1182.77	94.333	1207.96
1032	Arf1	7905.3	0.800113	0.0593424	13.483	1.96981e-41	3.62353e-40	5868.71	10796.9	5616.5	10159	5461.27	8802.43	10535.9	5082.57	10532.4	5423.94	9410.56	6427.17	6060.42	11678.4	5805.68	9920.15	5966.98	9352.04	5965.96	9239
1033	Tmem178	40.8926	3.89717	0.289182	13.4765	2.14987e-41	3.95094e-40	6.95378	61.1787	4.21667	126.213	9.38716	51.1935	60.4289	5.882	83.9017	2.85103	34.6161	6.734	0	80.0513	3.62875	63.7935	2.57228	109.069	7.39972	97.78
1034	Arhgef6	1031.41	-1.82332	0.135417	-13.4645	2.52899e-41	4.64316e-40	1532.4	364.262	1541.62	416.574	1267.98	496.013	373.814	1600.07	361.494	1628.93	595.991	1800.85	1715.91	286.179	1680.07	398.372	1694.18	755.801	1622.37	495.358
1035	Ppp2r5a	1105.21	1.44851	0.107607	13.4611	2.65055e-41	4.86164e-40	595.002	1604.82	562.806	1646.93	681.431	2133.31	1564	739.342	1930.51	702.811	1356.29	575.039	570.204	1520.94	454.413	1344.52	480.834	1305.46	566.228	1769.36
1036	Flii	4310.9	1.04353	0.0775325	13.4592	2.71743e-41	4.97951e-40	3138.28	6137.29	2574.79	6118	2225.3	4750.33	6155.39	2865.63	5596.4	3122.76	5822.96	2821.2	3190.88	6494.3	2617.49	5275.55	2872.61	5106.64	2729.15	6603.12
1037	Akip1	297.646	-1.20948	0.089869	-13.4582	2.75469e-41	5.04292e-40	472.983	162.289	400.337	171.96	370.039	153.732	197.099	348.55	165.206	436.208	197.119	433.874	435.958	196.286	418.182	188.845	411.308	219.933	438.778	134.231
1038	Hgs	1754.64	1.17595	0.0874137	13.4527	2.96906e-41	5.43012e-40	1273.97	2631.41	1074.13	2338.4	915.766	1906.73	2380.28	1010.92	2603.27	1116.98	2812.3	998.019	1264.97	2712.63	978.843	2121.95	1120.25	2036.34	1004.1	2791.63
1039	Pmpca	1923.18	0.877635	0.0652452	13.4513	3.02336e-41	5.5241e-40	1341.06	2526.57	1279.03	2478.07	1277.51	2396.64	2567.83	1202.17	2399.41	1603.54	2477.26	1585.97	1283.96	2676.18	1192.63	2379.18	1513.16	2420.08	1262	2601.37
1040	Chst12	396.591	-1.54634	0.114976	-13.4493	3.10952e-41	5.67607e-40	612.035	177.519	558.371	154.849	473.087	179.372	241.571	579.945	265.412	697.301	173.881	583.274	646.418	186.642	590.472	283.446	603.809	178.37	587.775	158.26
1041	Mpv17	590.777	-1.68308	0.125174	-13.446	3.252e-41	5.93045e-40	961.934	270.96	968.351	255.482	742.429	164.239	349.456	1045.15	289.07	730.913	284.534	671.155	1195.94	265.666	913.419	305.42	851.342	331.176	933.63	285.271
1042	Tcirg1	10637.3	1.36591	0.101587	13.4458	3.26075e-41	5.9407e-40	6770.61	14313.4	6167.87	16565.1	3991.27	14052.4	15417.4	6639.44	15918	6337.17	13950.2	5170.89	6863.62	16392	5671.38	13020.7	6170.25	12861.5	5689.71	20783.5
1043	Kif21b	248.723	-2.22295	0.16542	-13.4382	3.6092e-41	6.56923e-40	400.216	66.1996	393.725	105.309	317.17	75.9141	93.579	426.339	98.0754	540.719	105.96	191.223	543.825	83.0351	434.157	94.4595	472.863	91.9438	383.283	56.4747
1044	Smc3	267.483	-1.59929	0.119172	-13.4201	4.61356e-41	8.38925e-40	376.233	100.487	419.401	124.828	365.227	154.546	104.275	349.781	111.547	408.483	216.289	529.477	337.226	133.999	354.782	123.504	442.508	157.437	419.153	120.475
1045	Gbp9	481.955	3.87073	0.288442	13.4194	4.65314e-41	8.45017e-40	47.554	702.599	76.3182	1157.46	52.0742	1308	1307.65	49.723	748.643	19.3999	676.994	50.6074	41.6437	796.809	201.823	585.134	22.901	717.295	58.6126	1017.85
1046	Snw1	1088.03	1.0669	0.0795046	13.4194	4.65596e-41	8.45017e-40	716.562	1490.08	688.177	1605.82	646.829	1387.03	1567.79	584.648	1372.59	658.889	1231.64	723.615	788.391	1589.79	915.498	1590.39	657.284	1324.74	665.187	1555.68
1047	Clcn6	294.861	1.35217	0.100773	13.4179	4.74726e-41	8.60763e-40	208.237	444.951	192.444	457.333	129.6	375.506	430.336	155.044	449.697	177.984	432.779	171.386	153.274	458.45	132.914	346.694	155.565	348.782	179.534	496.704
1048	Hiatl1	1642.05	1.11909	0.0834208	13.415	4.93727e-41	8.94363e-40	1045.16	2319.45	1202.04	2225.41	813.391	2283.91	2617.23	1028.08	2500.61	864.61	2012.16	912.181	1165.09	2155.73	1027.66	1995.72	1231.71	2086.9	1069.72	2284.31
1049	Cd84	4083.79	-1.38908	0.103696	-13.3957	6.41004e-41	1.16004e-39	6798.25	2077.08	6713.14	2438.47	4328.08	1995.06	2895.16	6549.8	2226.05	5219.93	1890.25	4223.11	6840.34	2231.74	6756.04	2253.57	5608.96	2331.5	6091.23	2207.98
1050	Arap1	4262.8	0.912266	0.0682192	13.3726	8.74568e-41	1.58122e-39	3672.35	4812.96	2969.06	5877.81	2693.88	5525.28	5774.88	2767.02	5931.59	3194.32	5845.32	2843.59	3043.15	5867.68	2530.93	5134.1	2972.35	4960.74	2901.72	5937.27
1051	8430419L09Rik	66.0717	-2.66155	0.199044	-13.3717	8.85301e-41	1.5991e-39	121.309	4.03476	92.7969	14.8691	132.94	19.5147	14.8553	91.2737	18.8259	126.379	41.1673	121.746	104.706	19.6873	106.605	10.4103	143.987	30.9096	98.0135	7.40368
1052	Larp1	607.961	1.90095	0.142176	13.3704	9.00311e-41	1.62467e-39	235.311	872.617	260.113	1007.66	135.347	849.623	847.019	226.707	1381.78	388.217	901.832	305.036	219.211	986.094	286.009	768.503	272.235	902.951	245.587	1067.37
1053	Pilrb2	130.277	2.72578	0.203996	13.3619	1.00928e-40	1.81957e-39	25.241	235.846	16.2699	182.703	46.9622	175.051	265.476	27.9261	233.076	62.6976	222.623	27.1688	14.0148	179.25	41.1196	303.183	44.6137	269.73	36.996	195.586
1054	Dennd2c	112.988	-2.4598	0.184128	-13.3592	1.04661e-40	1.88509e-39	176.832	15.0098	152.802	33.9536	224.166	56.2056	19.5949	178.935	43.3135	219.38	56.0632	200.179	166.221	28.6559	160.721	34.8389	229.57	48.8838	205.024	9.41105
1055	Rnf139	429.625	1.45323	0.108811	13.3556	1.0985e-40	1.97668e-39	205.284	459.763	219.959	787.397	171.026	586.009	705.395	219.062	600.847	221.008	467.132	240.439	262.143	682.239	290.348	561.626	249.364	702.685	233.911	726.857
1056	Tnfaip2	3476.2	3.03483	0.227333	13.3497	1.18947e-40	2.13835e-39	1343.52	7495.63	978.89	9060.61	370.799	4563.7	7420.5	831.159	6366.57	653.336	2890.25	324.595	933.267	6603.53	805.034	8254.97	511.195	3624.05	814.33	5678
1057	Mef2a	1404.07	0.906979	0.0679842	13.341	1.33612e-40	2.3997e-39	984.126	2161.27	980.841	2029.78	979.345	1944.57	1494.62	953.819	1780.25	879.519	1668.2	946.969	957.668	1964.26	986.25	1695.65	1149.42	1771.06	933.496	1820.19
1058	Abhd15	73.5652	-3.88264	0.29119	-13.3337	1.47452e-40	2.64577e-39	136.33	51.3142	139.802	2.41281	99.0396	5.40192	33.9658	133.397	11.0357	153.66	0	117.651	142.049	11.3644	119.557	3.3859	150.054	11.05	145.426	4.40803
1059	Pdgfrb	41.1823	5.39816	0.405327	13.318	1.81801e-40	3.25903e-39	3.51302	134.375	0	60.927	4.42931	44.3653	133.167	2.91893	115.126	0.943912	52.6291	0.164189	2.55895	76.3695	1.20434	73.8131	1.72046	55.3121	3.15055	56.957
1060	Cxcr4	96.6851	-6.30666	0.473732	-13.3127	1.95272e-40	3.4972e-39	334.705	0	203.246	6.10713	83.5974	4.35594	2.44066	268.961	1.28569	131.259	8.23151	42.9565	261.457	3.15564	289.586	0	152.107	0	134.646	5.60397
1061	Mis18a	148.953	-2.20333	0.165652	-13.301	2.28468e-40	4.08788e-39	191.626	22.2906	252.427	51.2824	252.009	77.811	49.3319	216.128	37.8997	216.661	56.3024	228.751	208.614	39.9872	259.006	59.6835	318.271	83.2684	315.33	42.3718
1062	Ptgir	125.021	3.16967	0.238305	13.3009	2.28749e-40	4.08904e-39	25.8593	294.89	17.7922	157.245	16.6163	76.6791	216.734	29.7429	330.109	49.323	334.315	25.5009	28.9234	216.683	15.426	249.691	25.6013	202.593	14.527	172.179
1063	F11r	225.285	2.26674	0.170438	13.2995	2.32921e-40	4.15971e-39	85.1056	522.411	54.5368	311.262	60.5489	275.155	203.395	70.1348	299.269	81.0601	557.222	81.6468	65.2943	361.64	104.488	424.641	103.928	339.481	61.2486	443.228
1064	Rhoc	2167.25	1.76252	0.132545	13.2975	2.39346e-40	4.27044e-39	1168.35	3951.09	777.192	3421.06	619.072	2374.03	2613.86	823.556	3462.03	1442.47	3152.11	867.338	1029.54	3811.18	1050.96	3446.21	1129.59	3132.07	961.507	4111.77
1065	M1ap	69.9072	-2.95636	0.222468	-13.2889	2.68425e-40	4.78476e-39	114.805	8.71133	94.4379	19.2759	184.122	30.2926	10.3093	113.364	10.079	104.228	11.4654	174.063	125.969	16.4997	129.108	13.5572	96.376	17.4885	102.304	21.6883
1066	Plxdc1	110.455	-3.25685	0.245111	-13.2872	2.74484e-40	4.88818e-39	238.445	4.94354	167.774	25.1678	271.67	55.2345	8.3436	213.932	19.3905	176.723	14.8691	251.736	220.578	18.7782	119.013	11.3494	170.616	21.948	178.158	20.4323
1067	Hspa5	10537.2	1.30873	0.0985939	13.274	3.27692e-40	5.83028e-39	5254.36	14409.9	5111.71	16061.1	6833.59	16588.3	16179.5	4392.53	13512.2	6495.57	12976.3	8507.33	5752.75	16570.8	6345.59	13376.3	6024.14	14205.5	5885.42	16260.1
1068	Cd300a	1515.64	-3.16383	0.23844	-13.2689	3.50809e-40	6.23573e-39	4098.16	779.485	3221.81	216.943	1318.89	232.635	252.186	3099.45	175.073	2496.01	520.346	1391.07	3452.1	214.91	2717.7	215.048	2641.22	357.839	2696.78	215.152
1069	Acadm	565.796	-1.24955	0.0941804	-13.2676	3.56815e-40	6.33656e-39	860.853	329.902	756.03	271.454	737.571	304.28	289.456	726.075	319.429	729.291	476	845.517	890.637	341.597	724.046	305.838	791.118	432.205	885.205	299.419
1070	Cdca5	111.492	-4.07269	0.307114	-13.2612	3.88824e-40	6.89853e-39	105.7	4.754	157.518	16.1591	239.39	17.1568	6.41658	138.648	9.29876	348.435	10.389	293.209	114.55	8.29721	180.428	2.27562	275.819	22.2518	249.598	29.5559
1071	Rgs18	161.66	-3.75508	0.283185	-13.2602	3.94015e-40	6.98411e-39	192.667	4.3613	303.108	4.45635	479.745	55.4911	44.2706	292.594	22.1327	185.971	26.7643	305.971	240.982	12.716	377.036	16.7095	309.866	14.5965	327.464	16.2936
1072	Plxnb3	52.4812	-2.64377	0.199428	-13.2568	4.12208e-40	7.29977e-39	95.8071	0	77.1592	20.5575	76.6324	17.5528	18.3291	89.2517	7.07912	114.34	6.93895	85.0829	114.114	18.537	86.0625	12.7866	89.0246	14.1684	83.2703	22.9309
1073	Dock4	459.48	1.68486	0.127102	13.256	4.16753e-40	7.37339e-39	207.533	683.871	197.663	499.201	227.601	824.025	710.397	177.34	903.01	297.931	636.847	230.939	134.416	730.867	209.384	683.273	286.528	626.352	209.472	712.944
1074	Sh3bp4	273.803	1.64721	0.124311	13.2507	4.46993e-40	7.90104e-39	147.323	429.344	123.794	461.874	189.46	402.517	394.731	92.3631	426.332	122.069	382.898	106.497	147.804	504.146	125.778	337.499	114.362	334.575	165.157	467.536
1075	Ankib1	314.749	1.47952	0.111791	13.2347	5.52926e-40	9.76441e-39	217.911	407.145	174.16	561.593	118.487	425.361	452.758	170.162	552.541	139.619	390.329	139.582	147.164	417.589	201.039	472.725	193.127	457.798	170.581	485.316
1076	Cdkn2b	371.111	3.11637	0.235623	13.2261	6.20299e-40	1.0944e-38	70.1623	728.067	48.2037	549.516	123.621	173.095	802.472	66.3984	776.727	88.6573	761.038	136.395	43.2207	748.201	58.1856	797.047	64.6856	840.059	62.4845	483.986
1077	Tmem128	545.03	1.17047	0.0885601	13.2167	7.02887e-40	1.23896e-38	348.548	815.003	343.787	1016.31	291.495	625.728	748.585	291.73	719.621	343.688	677.052	342.891	301.623	726.25	328.571	738.914	372.523	659.426	382.793	826.06
1078	Mapk6	1383.76	1.3555	0.102598	13.2118	7.50223e-40	1.32117e-38	899.766	2338.23	880.786	2072.8	921.494	2027.91	2169.89	668.82	2223.61	663.633	1595.15	873.698	706.35	2136.97	613.394	2191.61	788.961	1460.95	754.839	1686.31
1079	Clec4a1	4816.63	1.78655	0.135288	13.2055	8.15897e-40	1.4355e-38	2199.19	7891.83	2191.54	8703.76	3228.03	9721.02	7151.42	1967.11	7175.25	1439.91	5552.47	2888.76	2360.65	7821.59	2140.78	7146.86	1548.36	6312.49	1681.29	7210.32
1080	Timm23	1767.77	1.09258	0.0827512	13.2032	8.40733e-40	1.47782e-38	1023.87	2242.28	1100.41	2714.43	1050.76	1725.18	2458.59	1015.22	2481.63	1240.12	2080.23	1209.01	1052.73	2646.9	1177.22	2694.43	1295.74	2359.6	1127.16	2659.99
1081	Kif18b	115.407	-3.93161	0.297779	-13.2031	8.41832e-40	1.47838e-38	99.4355	9.26692	218.373	47.9607	200.597	14.2516	4.20462	144.275	17.8106	337.269	13.4459	327.456	126.928	4.52502	174.313	14.0683	249.506	17.2676	273.69	13.5063
1082	B3gnt1	269.065	-2.024	0.153317	-13.2014	8.60855e-40	1.51039e-38	541.39	95.9481	430.256	81.6998	286.853	84.5591	123.958	411.488	92.0254	469.67	183.524	347.773	487.066	66.1235	466.459	142.03	422.311	87.5787	438.379	122.202
1083	Pold1	250.164	-2.8508	0.216216	-13.185	1.07118e-39	1.87767e-38	362.608	57.8658	298.405	37.9699	435.987	67.943	32.1962	316.137	63.1779	680.247	140.964	595.221	331.379	63.371	339.429	55.9159	602.663	73.064	414.655	34.0906
1084	Ier2	649.963	2.70411	0.205105	13.184	1.08433e-39	1.89897e-38	145.799	871.352	128.949	1317.43	255.634	763.432	823.628	144.379	1446.95	224.668	865.787	183.785	142.502	2287.23	134.431	1048.49	194.164	519.632	174.613	1326.39
1085	Fam3c	186.676	-1.77293	0.134482	-13.1834	1.0934e-39	1.9131e-38	290.427	65.0947	307.795	95.342	347.606	89.4952	86.1245	267.345	96.8727	317.205	70.3357	215.997	328.884	72.3774	270.57	72.2506	303.49	128.423	258.986	48.8978
1086	Dusp3	2424.38	-1.12308	0.0852094	-13.1802	1.14085e-39	1.99338e-38	3738.57	1722.62	3350.9	1231.26	2831.53	1218.98	1762.64	3267.99	1641.89	3331.69	1498.52	2726.54	3600.77	1611.1	3478.82	1750.82	3601.76	1475.95	3301.89	1343.45
1087	Ppp4r2	375.536	2.14911	0.163056	13.1802	1.14138e-39	1.99338e-38	122.008	567.928	142.823	751.749	191.528	424.295	634.526	154.25	819.746	72.696	507.928	102.99	139.418	612.282	180.667	789.115	159.531	623.929	120.09	393.219
1088	Msh6	200.195	-2.67365	0.202868	-13.1793	1.15522e-39	2.01568e-38	275.434	108.446	301.916	40.1126	329.867	18.7686	39.9265	323.269	39.9285	464.723	67.8278	439.483	263.408	63.6405	242.171	45.7656	410.147	63.0894	384.602	81.3665
1089	Txnip	1554.32	-1.60267	0.121625	-13.1772	1.18754e-39	2.07018e-38	3324.96	875.26	2543.22	621.913	1654.99	627.266	561.132	2653.47	848.753	2102.96	785.097	1929.26	2721.37	897.465	2023.8	809.006	2254.68	816.112	2171.03	864.711
1090	Psmb6	6194.23	1.48808	0.112953	13.1743	1.23313e-39	2.14768e-38	3617.26	8338.85	3207.19	9802.14	2746.18	5056.87	9968.56	2873.64	9863.16	3523.17	8542.15	2760.6	3526.71	10166.7	3830.88	10496.1	3256.46	8028.75	3223.87	11055.4
1091	Nbr1	828.308	-1.6974	0.128854	-13.173	1.25444e-39	2.18279e-38	1537.82	346.588	1486.34	344.463	897.819	358.061	390.913	1428.2	367.066	1014.51	548.854	980.445	1789.2	349.723	1281.64	398.29	1176.93	465.265	1063.91	340.119
1092	Tmem71	125.017	-3.09501	0.235009	-13.1697	1.31078e-39	2.27873e-38	216.175	13.0393	283.231	14.8559	166.51	37.3365	26.5975	265.82	14.352	176.925	22.7298	110.75	236.31	25.4475	277.417	30.2085	247.05	52.4622	266.832	16.2808
1093	Ninj1	6329.11	1.53666	0.116684	13.1694	1.31674e-39	2.287e-38	3999.05	10168.1	3375.09	10194.9	2847.34	4842.81	9137.75	3106.88	11167.9	3055.07	8952.74	3230.03	3836.88	9970.17	2901.77	10218.2	3003.26	8461.98	3092.16	11020.2
1094	Tle4	337.528	1.21576	0.0923182	13.1692	1.32005e-39	2.29066e-38	192.166	481.358	218.754	564.551	143.912	426.653	427.409	189.334	518.636	207.752	459.363	185.994	216.13	476.055	249.36	454.435	212.402	428.948	225.462	471.894
1095	2900026A02Rik	73.6988	-7.34326	0.557637	-13.1685	1.33158e-39	2.30856e-38	83.4467	0	147.641	1.48565	118.476	1.34506	0	67.1075	0.387499	227.399	3.75577	206.67	167.611	1.27305	134.846	1.03914	136.766	0.970013	173.758	0
1096	Thap3	63.2554	-2.68902	0.204297	-13.1623	1.44552e-39	2.50381e-38	112.462	12.5312	131.869	14.7812	115.456	18.2628	16.8648	110.578	19.6468	78.8497	19.6302	95.2792	145.203	11.6946	150.125	11.2223	79.2627	21.4365	76.2433	23.7084
1097	Lrrc20	153.543	-2.53433	0.192579	-13.16	1.49119e-39	2.58055e-38	262.706	34.7545	253.101	22.284	220.75	28.0391	29.5583	256.438	63.6047	368.839	87.0174	244.948	291.31	67.4415	202.58	55.1886	287.052	38.852	231.976	24.4185
1098	Msl3	403.526	-1.17785	0.0895249	-13.1567	1.55683e-39	2.6917e-38	522.6	345.014	514.995	214.49	496.439	205.872	244.047	539.421	240.421	565.878	257.292	544.46	526.708	252.889	647.302	291.636	639.303	250.506	583.795	187.454
1099	Tmem126b	311.312	-1.43515	0.109112	-13.153	1.63454e-39	2.82349e-38	414.577	103.705	457.169	105.155	477.071	198.771	153.433	450.864	162.59	484.135	195.394	451.304	442.574	184.068	493.25	197.109	439.741	221.125	453.822	140.387
1100	Arfrp1	610.675	0.86723	0.065966	13.1466	1.77945e-39	3.071e-38	440.009	771.851	396.821	856.803	376.675	691.941	782.767	443.93	775.034	502.411	889.655	424.686	427.947	771.714	441.985	860.393	465.143	737.086	399.448	757.21
1101	Gmppb	515.652	1.80269	0.137188	13.1403	1.93432e-39	3.33525e-38	214.171	706.721	147.202	902.786	225.752	877.67	875.856	177.076	826.829	298.867	745.202	343.795	238.034	873.32	178.647	684.909	247.24	571.482	223.523	953.955
1102	Tshz1	261.653	2.26123	0.172134	13.1364	2.03668e-39	3.50855e-38	60.4342	442.145	85.9311	424.797	68.9917	198.61	536.549	82.2075	577.539	121.91	461.741	82.4561	96.314	503.055	68.6867	415.097	138.215	421.807	98.928	347.648
1103	Ankrd44	324.67	-1.7234	0.131253	-13.1304	2.20557e-39	3.79605e-38	610.008	198.288	508.782	161.024	442.126	160.726	127.849	630.903	165.734	426.729	165.29	323.267	623.441	133.413	470.752	155.603	518.912	139.938	426.331	104.276
1104	Cybb	35902	2.24184	0.170794	13.126	2.3365e-39	4.01777e-38	17418	68598.2	12204.6	62132.3	5240.08	46649.9	62970.8	15848.9	59455	10847.3	55141.7	6347.73	15826	60082.9	17101.4	58667.2	12641.1	64762.5	11844.2	54260.8
1105	Ap2b1	1225.15	1.19939	0.0913784	13.1256	2.35066e-39	4.03846e-38	667.298	1687.32	868.104	1891.31	601.53	1471.11	1959.88	722.411	1806.81	676.871	1354.91	729.236	714.34	1747.88	967.475	1625.88	826.189	1911.68	672.497	1600.3
1106	Leng1	234.235	1.42393	0.108636	13.1074	2.98594e-39	5.12524e-38	110.839	318.072	115.098	349.09	122.177	349.697	317.39	81.639	320.25	125.146	324.155	130.08	169.666	392.993	157.015	345.431	149.829	350.158	119.314	336.661
1107	Mx2	999.81	6.0716	0.463239	13.1068	3.0092e-39	5.1605e-38	14.6469	1701.59	19.1403	2928.74	20.6983	2297.76	1813.18	10.3462	1934.55	7.51225	1488.98	19.9261	12.368	1857.23	166.2	1511.14	12.4847	1559.61	15.4757	2604.61
1108	Med10	505.72	0.952408	0.0726841	13.1034	3.14883e-39	5.39507e-38	362.748	687.45	307.714	788.421	343.885	622.309	697.325	318.908	667.528	369.642	567.969	368.817	390.626	722.611	353.57	615.135	331.049	594.118	304.355	700.223
1109	Med22	410.129	-1.71703	0.131113	-13.0958	3.47827e-39	5.95415e-38	724.14	240.238	611.157	182.648	408.286	164.415	122.679	709.625	215.752	617.179	181.164	515.796	870.471	207.71	586.717	187.404	584.605	226.299	661.175	185.118
1110	Ccl7	7536.13	6.24266	0.476897	13.0902	3.74736e-39	6.40899e-38	36.6469	9375.36	64.4676	17035.3	453.291	19358.9	16598.2	56.3286	15250.3	100.638	10937.6	841.278	94.6946	18144.4	128.407	17033.1	92.6445	8796.15	91.5261	16233.6
1111	1810011H11Rik	330.965	-2.89975	0.221624	-13.0841	4.05912e-39	6.93594e-38	556.04	118.271	553.15	50.4983	377.061	24.8113	66.2924	638.645	70.373	725.652	139.297	312.789	620.767	52.0942	640.809	94.2981	674.128	119.937	721.863	62.52
1112	Pqlc3	1354.49	-1.06736	0.0816352	-13.0748	4.58915e-39	7.83456e-38	1715.31	640.399	1750.06	750.545	1758.81	818.126	1123.46	1879.37	861.27	1953.27	851.581	1674.53	1860.17	933.932	1896.45	889.54	2058.13	1038.33	1826.69	809.747
1113	Apobec3	1427.37	1.25347	0.0959026	13.0702	4.87216e-39	8.31025e-38	722.601	1744.06	790.746	2421.67	860.892	2543.79	2198.02	800.122	1857.37	875.515	1408	1026.95	895.136	2021.27	802.089	1792.55	887.451	1912.85	780.385	2205.94
1114	Uba6	653.359	1.09328	0.0837036	13.0613	5.48049e-39	9.33946e-38	429.705	1088.6	451.556	922.795	405.152	974.947	982.032	374.604	786.085	428.108	814.146	457.047	346.357	998.594	393.423	725.576	465.37	854.656	402.016	766.414
1115	Blcap	880.005	1.14226	0.0874751	13.0581	5.71077e-39	9.72316e-38	574.39	1194.84	520.091	1116.44	511.32	825.205	1380.72	488.917	1295.63	500.039	1347.65	534.801	635.541	1188.87	549.441	1366.85	581.876	1294.02	596.943	1096.51
1116	Chmp4b	158.83	2.1277	0.163196	13.0377	7.46924e-39	1.27057e-37	60.7714	216.515	52.7584	353.988	83.6416	211.175	265.154	56.2471	316.473	44.8725	187.138	49.1092	38.7728	267.338	89.9801	293.864	68.5673	173.127	49.6514	297.45
1117	Ticam1	513.5	1.32874	0.101943	13.0342	7.82238e-39	1.32945e-37	373.716	673.688	279.013	652.172	271.063	556.061	688.582	280.45	843.66	331.141	795.522	269.39	309.12	870.306	296.714	828.124	306.772	654.804	210.933	778.764
1118	Fam168a	143.061	-2.42798	0.186305	-13.0323	8.01814e-39	1.36151e-37	255.243	79.0452	264.819	21.0878	143.346	42.8846	42.0023	260.426	45.9846	261.951	45.6638	246.478	266.165	40.0138	205.912	80.0472	236.703	27.523	264.102	31.83
1119	Ctdsp2	226.225	-3.05749	0.234619	-13.0317	8.07618e-39	1.36891e-37	562.391	36.3954	497.971	70.1066	167.9	42.1606	40.3162	527.416	68.2182	357.612	15.8115	206.093	643.936	48.0493	348.736	37.0883	333.607	52.9301	405.191	62.5735
1120	Rnf34	662.089	1.19231	0.0914926	13.0318	8.07312e-39	1.36891e-37	431.667	845.712	425.455	1094.93	311.064	853.076	958.306	386.004	904.734	333.375	779.618	399.411	469.323	911.363	485.495	857.98	352.989	896.758	448.837	1095.69
1121	Rassf3	126.611	-3.4743	0.266624	-13.0307	8.18307e-39	1.38579e-37	215.611	0	206.756	14.8603	168.813	5.35007	14.7862	285.624	29.4785	295.018	22.6733	119.256	214.769	15.2754	336.418	17.6996	277.722	38.8525	209.837	43.417
1122	Tpm1	663.125	-1.61302	0.123821	-13.027	8.58686e-39	1.45288e-37	852.949	217.026	916.228	301.062	1265.06	384.542	288.58	745.27	300.72	972.957	406.946	1492.86	948.739	341.133	863.212	334.157	1018.41	327.303	920.046	365.304
1123	Agfg1	427.71	1.799	0.138108	13.026	8.70149e-39	1.47096e-37	129.962	614.528	187.874	471.133	133.278	803.409	740.56	138.842	740.744	250.678	660.676	214.78	155.285	732.069	232.343	598.441	233.146	677.774	237.542	601.137
1124	Cx3cr1	481.918	-3.62583	0.278432	-13.0223	9.1356e-39	1.54297e-37	941.302	89.4946	323.37	41.3669	700.542	113.336	36.5388	536.211	40.9812	1824.96	97.5495	1299.83	736.451	45.7518	850.933	57.9793	1199.03	123.889	494.982	83.8611
1125	Elf1	446.063	-1.05762	0.0813012	-13.0087	1.09254e-38	1.84362e-37	625.112	300.996	534.685	289.417	571.455	268.977	228.671	536.648	265.696	559.143	284.307	623.774	607.426	298.944	642.219	287.626	659.695	361.768	662.965	311.727
1126	Smcr8	932.611	1.00972	0.0776884	12.997	1.27167e-38	2.144e-37	693.248	1290.04	604.964	1280.62	512.019	908.233	1422.3	635.726	1274.52	668.259	1279.88	667.118	559.88	1310.96	616.037	1268.94	647.811	1183.79	577.589	1250.27
1127	Wdr6	322.258	-1.63401	0.125771	-12.9919	1.35941e-38	2.28989e-37	510.463	130.147	491.14	130.737	349.783	138.047	153.785	461.576	127.155	609.289	143.229	445.589	556.198	150.189	416.894	154.99	536.528	230.044	500.531	208.845
1128	Creb3l2	107.475	-2.42848	0.186976	-12.9882	1.4276e-38	2.40262e-37	198.256	4.10391	153.636	28.1613	149.562	34.4696	30.8533	190.252	37.087	181.457	31.9909	158.735	192.917	30.1665	233.668	22.6428	213.485	72.5585	154.662	30.8331
1129	Mdp1	150.642	-1.88322	0.145067	-12.9818	1.55288e-38	2.61116e-37	282.69	61.1801	213.917	66.8413	189.478	70.9651	91.4215	270.094	54.7822	248.058	65.3528	176.57	300.589	71.1842	211.711	55.4328	231.605	71.1031	252.696	27.1682
1130	Spaca6	490.308	1.85232	0.142765	12.9746	1.70529e-38	2.86489e-37	186.133	938.464	182.392	962.668	159.832	635.981	562.636	333.883	993.702	202.013	728.183	224.287	195.893	757.612	269.583	823.592	215.316	649.678	156.063	628.254
1131	Spry1	35.994	4.99666	0.385565	12.9593	2.08047e-38	3.49211e-37	1.76372	83.4853	0	65.2323	0.558156	20.1053	85.2703	2.46511	105.448	3.82493	87.0758	1.29207	3.86483	72.1809	7.21016	86.3998	2.16733	40.755	2.13065	48.649
1132	Gcsh	515.98	-1.87983	0.145292	-12.9383	2.73512e-38	4.58688e-37	628.081	150.632	699.397	201.261	921.82	236.132	245.864	590.765	189.015	909.357	213.105	1336.79	713.026	185.883	733.022	220.266	851.425	308.398	739.009	246.351
1133	RP23-76C20.4	70.8772	5.50196	0.425313	12.9363	2.81007e-38	4.70842e-37	2.63285	121.447	2.41095	93.6136	4.98246	347.544	115.376	5.35496	115.92	0	124.281	8.85033	0	110.76	1.20486	89.4484	0.43004	148.51	0	124.777
1134	Dagla	77.598	-2.74383	0.212185	-12.9313	2.99705e-38	5.01728e-37	139.228	15.9858	145.516	12.3324	152.32	44.355	4.12888	111.246	27.1637	152.316	24.2572	117.999	170.956	23.4829	119.94	23.0047	142.847	12.5262	92.3488	20.0069
1135	Snrnp35	202.099	1.60733	0.124302	12.9309	3.01323e-38	5.03993e-37	141.74	267.259	100.924	300.064	83.4564	248.496	371.892	76.67	285.211	100.618	274.331	116.777	88.8188	353.855	95.4928	354.779	113.002	246.511	80.4676	341.62
1136	Tmem219	844.788	1.15586	0.0893946	12.9298	3.05506e-38	5.10539e-37	550.508	992.55	464.543	1445.4	548.058	1262.31	1091.5	438.837	1128.82	518.896	1128.36	537.583	632.459	1225.17	549.32	1111.71	506.163	887.364	493.968	1382.24
1137	Mta3	246.679	-1.0023	0.0775689	-12.9214	3.41047e-38	5.69432e-37	352.507	174.607	344.546	157.946	289.641	183.398	164.551	335.118	154.146	316.772	163.025	316.496	384.338	162.497	319.82	166.686	330.713	158.435	295.456	162.882
1138	Bin2	689.478	-1.5502	0.119989	-12.9196	3.49033e-38	5.82253e-37	1140.57	452.52	830.506	223.872	887.818	252.502	303.702	980.344	394.027	1070.02	387.226	937.058	1171.39	423.115	1066.74	443.061	1054.82	346.844	1131.8	291.617
1139	Cab39l	749.382	1.10159	0.0852796	12.9174	3.58951e-38	5.98273e-37	470.919	916.992	430.873	1042.88	481.841	888.341	1120.1	462.333	947.973	389.767	996.024	524.918	493.085	1324.57	500.526	849.934	546.107	1102.62	464.032	1033.8
1140	Prkdc	141.067	-2.42062	0.187418	-12.9157	3.67236e-38	6.11545e-37	231.758	19.7422	260.248	38.945	209.854	89.5052	47.3477	244.332	42.1193	239.697	55.1477	265.65	204.654	40.7691	224.008	22.276	268.612	59.5013	233.457	23.7103
1141	Rab19	58.5044	-2.41055	0.186643	-12.9153	3.69149e-38	6.14191e-37	79.0235	4.37628	92.7958	17.8235	104.367	22.2553	20.6319	121.728	18.6572	86.5913	11.5782	72.117	113.271	21.6038	135.602	16.7524	89.1686	19.4934	100.51	21.7416
1142	Tcea1	955.794	1.23484	0.095688	12.9048	4.22743e-38	7.02745e-37	477.498	1674.07	586.975	1466.3	603.813	1433.44	1387.86	567.219	1367.92	419.703	1082.84	653.726	540.274	1408.55	621.874	1372.49	658.212	1183.05	564.308	1045.74
1143	Mfsd7a	78.1495	3.78154	0.293073	12.9031	4.32591e-38	7.18487e-37	5.24659	195.707	14.4615	200.532	0	106.466	184.639	15.1284	137.718	22.7181	129.031	10.5657	10.2141	142.476	8.44561	89.6223	7.30179	164.227	12.659	105.833
1144	Tdg	727.267	1.21571	0.0942287	12.9017	4.40338e-38	7.30715e-37	370.988	1080.57	391.331	1124.8	405.53	803.347	914.954	451.873	996.051	367.075	1152.87	525.648	394.43	1101.02	430.882	1043.14	565.133	1069.52	461.028	895.142
1145	Cd82	1070.32	1.06704	0.0827084	12.9012	4.43041e-38	7.34557e-37	802.3	1495.96	756.639	1467.6	550.869	1224.19	1356.07	712.41	1379.86	664.77	1616.83	643.085	847.496	1655.33	643.114	1418.03	654.189	1286.02	635.985	1595.69
1146	Ttll1	147.833	-2.16722	0.168024	-12.8983	4.60284e-38	7.62481e-37	231.838	42.7429	207.668	37.6662	209.802	102.713	28.9429	214.152	46.3721	323.057	78.6093	220.348	256.18	60.9393	245.164	40.8954	268.013	54.4409	236.801	50.3178
1147	Fam216a	52.1082	-2.65504	0.205909	-12.8943	4.84873e-38	8.02514e-37	71.0263	13.1582	87.3691	7.42588	81.1257	26.0273	7.36205	99.8461	9.3348	98.1926	11.6494	105.389	97.8806	10.1623	86.0675	15.7315	88.6742	22.4409	81.5486	21.7523
1148	Cycs	2134.56	1.90602	0.147862	12.8906	5.08521e-38	8.4092e-37	585.457	3345.67	766.617	3798.89	1148.16	3716.61	3231.37	612.788	3299.03	898.449	2404.65	1441.52	627.646	3702.36	1063.88	3842.48	1044.69	2894.65	797.815	3468.56
1149	Clcn7	6682.84	1.48715	0.11539	12.8881	5.25528e-38	8.68288e-37	3599.71	11115.9	3466.55	10135.8	2260.56	5879.51	12659.9	3588.73	9905.25	3883.95	9997.13	3079.22	3711.04	9055.69	3949.63	9110.02	3856.5	10001.9	3746.12	10653.7
1150	Ghitm	5452.68	0.970309	0.075296	12.8866	5.35521e-38	8.84028e-37	3447.62	8168.06	3665.93	6925.42	3034.57	5511.91	8412.48	3667.89	7118.69	3559.81	7145.44	3511.29	3830.19	7507.94	4318.1	7464.13	3966.73	7227.15	3849.15	6721.13
1151	Ttc30b	46.2345	-4.17086	0.323667	-12.8863	5.37827e-38	8.87065e-37	106.736	0	102.482	4.45829	60.8628	1.33163	1.47781	82.9951	8.15022	64.3939	7.59234	66.0346	157.118	6.36345	73.6283	2.08509	71.763	6.80517	94.9826	5.42969
1152	Sgol2	125.968	-2.95616	0.229468	-12.8827	5.63437e-38	9.28498e-37	101.16	8.34155	194.793	30.5302	239.066	22.9948	31.6385	214.33	26.475	297.712	43.4317	292.537	139.059	17.9822	218.732	19.6272	284.15	52.9031	252.59	31.3082
1153	Snx30	191.068	-2.51655	0.195456	-12.8752	6.20462e-38	1.02158e-36	330.4	25.7762	384.714	40.3983	252.32	94.076	34.7575	304.489	91.7918	256.642	103.563	340.355	356.714	52.4627	295.799	40.0308	426.548	40.7184	303.688	46.109
1154	Mafk	725.722	1.3196	0.102492	12.8752	6.21004e-38	1.02159e-36	440.983	1084.66	422.026	1111.98	282.157	805.277	885.461	461.64	1120.74	449.156	1013.75	333.174	471.424	1201.35	459.225	972.897	455.097	975.627	381.092	1186.73
1155	Vash2	50.5737	-4.3918	0.341129	-12.8743	6.28031e-38	1.03226e-36	78.9516	0	133.252	7.43222	70.3211	20.0975	1.47933	82.8413	3.49123	90.7583	7.5489	99.0063	117.677	1.27341	89.2266	0	113.546	3.8853	90.6851	0
1156	Ints7	275.835	-1.38632	0.107689	-12.8733	6.36249e-38	1.04486e-36	367.044	136.894	395.973	148.075	369.932	179.773	135.059	385.656	142.77	457.527	156.713	469.799	344.32	164.019	294.934	163.501	476.757	178.734	434.578	114.651
1157	Rnf14	916.971	1.33502	0.103793	12.8623	7.33495e-38	1.20352e-36	616.07	1177.07	429.287	1277.45	511.983	1060.14	1437.01	380.191	1285.55	572.975	1188.48	564.454	530.265	1466.86	507.477	1321.06	680.231	1525.33	416.34	1391.19
1158	Cby1	55.1661	-2.77833	0.216047	-12.8598	7.57336e-38	1.24156e-36	128.554	0	82.6261	10.4052	76.1475	15.4544	11.7711	73.6551	12.8649	124.509	23.6043	79.5989	106.638	5.08221	93.6576	20.0115	106.621	19.5733	93.4772	19.0708
1159	Plekho1	272.976	-1.73971	0.135379	-12.8507	8.52893e-38	1.39701e-36	483.58	108.12	505.771	122.151	322.613	121.427	147.144	439.893	158.503	521.03	113.702	340.694	489.487	74.9032	345.192	152.266	402.894	120.061	360.751	129.342
1160	Tgfbi	211.68	-2.87473	0.223729	-12.8491	8.69624e-38	1.42319e-36	293.833	34.7958	368.801	99.5325	331.854	78.5242	32.4993	301.133	47.7208	468.607	41.7501	588.304	301.343	34.3499	326.997	21.8866	410.225	34.9865	332.33	84.1312
1161	Tmx2	605.709	-1.23316	0.0960508	-12.8386	9.96712e-38	1.62977e-36	776.41	285.357	838.014	346.866	830.873	399.123	347.211	690.223	300.177	932.745	422.086	921.191	818.404	377.689	829.518	379.491	1012.76	465.03	861.834	279.172
1162	Lrrc45	214.08	-1.58595	0.123539	-12.8376	1.00918e-37	1.64874e-36	406.079	102.674	274.215	97.5177	239.753	127.001	116.003	356.139	105.856	342.807	90.8204	296.373	434.327	103.753	340.041	99.4895	283.463	109.86	245.632	109.79
1163	Tmcc3	688.051	2.6523	0.206708	12.8311	1.09728e-37	1.79113e-36	298.871	1423.08	147.88	1556.61	145.774	1279.95	1224.71	164.452	1004.26	73.7674	822.287	114.307	265.749	1131.83	334.648	998.114	153.251	940.414	199.493	1481.59
1164	Ankle1	88.1076	-3.22645	0.251467	-12.8305	1.10629e-37	1.80428e-36	111.469	32.4647	101	12.4466	211.713	23.4095	17.8638	108.607	13.0117	187.804	19.7882	235.216	119.298	7.10377	122.939	12.6343	213.035	16.7279	159.119	36.5022
1165	Papd7	173.077	2.38524	0.185958	12.8268	1.16067e-37	1.89135e-36	34.1986	251.667	33.747	366.954	52.0221	266.57	207.003	43.8285	400.484	48.1843	207.415	59.2275	54.9748	315.641	118.093	320.429	63.1929	285.398	55.8539	276.665
1166	Gabpb1	268.339	1.48249	0.115585	12.826	1.17328e-37	1.91025e-36	137.986	406.059	112.077	438.793	130.221	340.152	367.017	140.467	493.364	120.524	325.877	196.896	122.964	363.847	127.994	463.028	161.224	356.741	162.091	399.458
1167	Mospd1	144.813	-2.41147	0.188169	-12.8155	1.34335e-37	2.18528e-36	227.1	65.5331	295.015	26.6585	145.244	64.378	33.9505	288.691	62.4193	168.24	27.0782	203.043	280.241	43.1276	274.423	36.6006	268.72	58.3787	294.603	32.8249
1168	Bola1	122.09	-1.78602	0.139448	-12.8078	1.48322e-37	2.40944e-36	226.753	55.419	170.211	47.3303	196.999	33.2127	40.4927	160.836	61.4021	211.45	91.8066	220.108	167.208	47.1703	170.271	72.3759	170.235	58.8597	188.252	51.4165
1169	Prdx1	89072.9	1.54134	0.120344	12.8078	1.48369e-37	2.40944e-36	43068.7	144002	40990.1	123315	46257.4	73518.4	155228	37766.6	143768	50893.1	113998	44621.3	41793.2	130465	51757	171307	56623.5	156417	41773.8	113896
1170	Cytip	65.5621	-4.0723	0.318008	-12.8056	1.5246e-37	2.47376e-36	47.8825	6.59235	163.055	4.52183	143.385	20.4274	8.25556	102.651	5.07229	159.22	1.90459	129.459	130.245	3.8748	86.7462	4.21667	201.559	15.2392	70.0572	6.87687
1171	Dock5	116.564	-2.3356	0.182486	-12.7988	1.66581e-37	2.70058e-36	184.732	8.654	177.173	40.1146	156.729	51.2905	29.6032	215.177	44.5459	225.277	63.6339	216.62	158.764	17.8269	176.864	23.878	214.701	37.8084	214.705	73.1868
1172	Lta	20.9713	5.37379	0.420548	12.7781	2.17443e-37	3.52213e-36	0	17.5749	2.41422	46.1175	1.10558	53.4355	51.6193	0	53.3766	0	27.2329	1.43275	3.81978	40.7167	0	35.7197	0.858171	32.2528	0	51.7491
1173	Rap2b	3539.11	1.16171	0.0909456	12.7737	2.30095e-37	3.72388e-36	2328.9	4616.49	2150.79	5767.49	2824.41	4161.12	4988.03	1938.11	4868.02	1816.7	4261.85	2153.16	2321.53	5786.56	2301.52	5620.11	2050.09	3955.01	1986.81	4885.52
1174	Dld	1141.43	0.991172	0.0776022	12.7725	2.33645e-37	3.77812e-36	714.044	1692.83	694.814	1411.26	675.232	1438.03	1756.08	771.995	1502.47	716.003	1356.89	927.562	727.618	1609.21	813.505	1499.3	813.87	1704.07	785.12	1218.69
1175	Pik3r6	544.097	1.65367	0.129478	12.7718	2.35577e-37	3.80612e-36	285.281	741.292	214.03	829.55	195.114	817.292	738.679	296.036	784.562	244.908	740.015	181.657	431.284	920.239	276.475	741.303	292.997	958.601	219.425	973.207
1176	Rpa1	625.722	-2.00684	0.157213	-12.7651	2.5689e-37	4.14694e-36	648.584	210.479	826.453	285.081	1027.02	262.014	239.095	782.338	197.982	1460.04	238.969	1416.3	807.481	242.829	824.987	191.88	1279.7	373.095	950.937	249.175
1177	Tmem218	45.4537	-3.03404	0.237695	-12.7644	2.59032e-37	4.17797e-36	78.68	8.7014	104.252	8.9133	77.98	15.9589	4.43124	97.1493	8.92417	58.708	18.9918	69.0354	71.4943	7.63293	71.2024	3.12733	81.1785	17.4956	97.074	8.14226
1178	Acox3	778.677	-1.98295	0.155382	-12.7617	2.6819e-37	4.32201e-36	1741.58	484.341	1361.61	312.383	713.695	232.56	308.315	1277.71	256.359	1195.21	291.671	766.586	1632.63	260.189	1286.71	300.118	1183.89	339.647	1241.9	386.431
1179	Smim14	1557.56	-1.25889	0.0986537	-12.7607	2.71655e-37	4.37414e-36	2554	926.85	2396.61	966.526	1789.32	850.607	854.055	2431.29	907.566	1771.27	857.718	1550.41	2639.87	1070.28	2515.85	854.451	2023.94	915.3	2303.02	972.237
1180	Ddhd2	550.725	-1.15043	0.090195	-12.755	2.92495e-37	4.70569e-36	786.825	381.73	844.883	329.815	663.607	332.468	340.114	776.531	345.789	585.629	410.741	716.033	833.697	311.838	750.613	370.286	776.011	371.743	855.609	230.539
1181	Ampd3	2759.06	1.89279	0.148435	12.7517	3.05148e-37	4.9051e-36	1116.18	4885.85	992.202	4093.42	875.715	2068.97	5212.96	1016.6	5141.97	1466.54	4363.81	994.244	1104.05	4012.81	1564.92	5081.9	1537.31	5078.22	1044.02	3529.45
1182	Stx17	226.484	-1.53733	0.120684	-12.7385	3.61236e-37	5.80178e-36	350.914	104.831	303.13	118.319	270.888	104.868	119.699	272.533	105.452	376.73	162.538	302.078	460.944	86.5547	323.673	135.489	339.569	104.159	351.846	135.465
1183	Cpeb1	338.548	-3.49549	0.274435	-12.737	3.68211e-37	5.9088e-36	767.631	148.137	637.835	14.19	309.34	48.247	53.9634	698.665	41.4448	613.721	72.2544	285.055	631.274	26.8746	724.783	33.3747	781.398	89.3737	729.637	63.7706
1184	Wrb	281.487	-2.65013	0.208194	-12.7292	4.07226e-37	6.52937e-36	362.779	0	377.386	89.1676	529.425	67.7781	41.3683	427.983	71.8189	539.186	117.925	654.166	490.338	72.5366	449.217	124.138	596.329	99.2004	440.257	78.7473
1185	Tmsb4x	45680.9	1.21336	0.0953307	12.7279	4.1383e-37	6.62966e-36	26746.4	62660.6	26811.7	71175.3	31468.1	76631.9	65783.6	21183.4	59070	26417.4	44832.9	32623.3	29538.6	71874.7	29215.1	70053.1	24740.3	53988.5	26555.1	62248.2
1186	Zc3h7a	1402.62	1.20225	0.0944917	12.7233	4.38708e-37	7.02229e-36	958.279	2224.67	939.556	2540.31	735.015	2002.56	1894.14	980.398	1653.34	691.995	1754.02	950.179	778.17	1753.64	735.79	1656.92	916.9	1972.81	795.933	2117.69
1187	Tnfrsf14	107.352	3.38519	0.266073	12.7228	4.41734e-37	7.06477e-36	20.0546	218.218	20.414	352.953	15.338	266.196	220.771	23.5105	225.838	12.5919	53.9336	16.8972	36.9655	129.245	23.8445	197.37	14.4649	102.708	8.64957	187.069
1188	Appl2	378.12	-2.28554	0.17967	-12.7208	4.53098e-37	7.24041e-36	730.071	235.929	648.377	143.241	576.058	82.6869	70.2585	669.168	168.453	553.694	209.786	575.153	721.78	145.017	582.526	82.963	568.52	76.1608	588.783	133.776
1189	Yme1l1	1226.71	0.98426	0.077382	12.7195	4.60902e-37	7.35892e-36	849.367	1847.61	986.936	1615.66	734.564	1873.99	1689.8	735.254	1597.88	764.897	1487.72	750.947	899.276	1571.31	914.663	1702.19	775.295	1633.44	836.177	1267.28
1190	Ift57	155.232	1.62967	0.128291	12.7029	5.69591e-37	9.08666e-36	56.9342	248.068	69.6141	186.491	94.8844	245.794	212.88	86.1177	219.238	83.5221	304.41	63.0873	47.314	217.458	88.7857	233.584	83.8376	290.096	79.2669	193.259
1191	Smg8	419.023	1.13544	0.0893876	12.7025	5.72751e-37	9.12939e-36	252.519	559.185	263.369	555.878	184.935	480.952	648.856	254.415	579.699	293.479	536.053	267.682	261.349	617.815	258.685	537.166	315.15	568.9	269.343	675.023
1192	Ago3	702.992	1.81834	0.143229	12.6954	6.27314e-37	9.9907e-36	410.993	1376.52	269.136	1285.96	308.113	752.754	1152.55	321.961	1114.48	220.821	918.469	492.78	311.389	964.928	212.335	1179.31	251.524	1077.75	301.646	1136.43
1193	9030617O03Rik	350.439	-1.57256	0.123945	-12.6875	6.93398e-37	1.10339e-35	541.033	174.149	442.641	144.908	493.285	255.324	185.574	485.713	131.395	574.263	196.43	629.817	472.649	171.975	549.274	115.573	556.417	191.446	482.66	214.259
1194	Pak1	334.697	-2.02541	0.159693	-12.6832	7.33202e-37	1.16575e-35	473.565	56.4921	458.582	118.844	598.561	202.773	144.814	447.91	123.727	595.01	143.884	716.119	532.688	134.872	519.791	132.272	536.65	182.626	517.788	56.979
1195	Pigyl	87.4495	-2.3481	0.185182	-12.6799	7.63942e-37	1.21361e-35	174.191	31.1044	128.404	14.8084	129.821	23.2631	17.4742	154.544	24.1976	186.511	24.2725	128.917	183.917	36.5712	140.73	44.5156	122.923	43.36	117.672	21.7951
1196	Med28	1573.57	0.856431	0.0675556	12.6774	7.8886e-37	1.25215e-35	1108.15	1851.38	1009.56	2133.29	1101.24	1862.33	2105.54	1003.27	2045.9	1301.37	1810.83	1181.77	1183.57	2216.96	1202.46	2213.25	1113.75	1773.3	1008.04	2245.49
1197	Speg	747.427	-1.70478	0.134528	-12.6722	8.42861e-37	1.33675e-35	1264.06	267.744	1122.9	349.964	733.899	262.999	280.044	1062.69	409.479	1496.14	544.373	993.942	1258.32	280.607	1191.29	362.293	1141.66	427.648	1171.49	327.008
1198	Kars	1280.05	1.10937	0.0875452	12.672	8.4513e-37	1.33923e-35	772.474	1762.72	779.892	1754.92	606.884	1926.14	1716.87	697.223	1744.91	912.538	1557.65	1075.37	808.027	1898.48	810.525	1542.48	872.796	1705.34	768.943	1886.75
1199	Selenbp1	150.469	-1.78926	0.141244	-12.6678	8.91649e-37	1.41176e-35	337.416	112.65	236.435	69.0073	189.464	62.3409	55.9186	230.878	58.943	185.657	47.4058	207.548	284.03	62.6693	208.779	84.9514	198.551	72.9621	239.367	64.4002
1200	Gm18852	144.462	4.10337	0.323929	12.6675	8.95182e-37	1.41618e-35	14.9011	303.971	13.8634	405.666	18.8181	422.762	226.228	8.77211	234.257	0	151.103	15.8504	17.8976	280.04	33.7587	163.44	4.72895	202.984	33.7392	336.456
1201	Cdc20	441.813	-2.72756	0.215421	-12.6615	9.66391e-37	1.52756e-35	381.531	38.045	704.079	123.627	712.509	110.786	84.971	684.257	104.069	1152.56	130.049	890.598	650.995	79.9688	673.034	84.9951	919.037	236.957	916.461	157.74
1202	Cenpa	310.105	-2.13715	0.168794	-12.6613	9.68602e-37	1.52851e-35	345.698	43.8603	517.946	97.6859	453.236	147.019	102.589	392.242	87.5891	614.999	93.1162	572.341	537.669	84.4472	475.586	125.826	591.152	166.486	560.286	192.319
1203	Rbbp8	358.869	1.50645	0.11898	12.6614	9.68087e-37	1.52851e-35	148.868	547.404	142.222	628.425	188.665	556.768	576.397	149.188	552.29	195.775	401.061	198.698	177.6	648.98	186.911	479.012	261.704	480.808	222.493	434.118
1204	Rpl24	3006.89	1.02459	0.0809698	12.6539	1.06423e-36	1.67801e-35	2385.85	3857.63	2011.26	4583.33	1925.8	4233.18	4434.56	1843.8	3960.71	1812.57	3220.27	2249.95	1940.38	3853.23	2142.8	4692.23	1800.98	3410.86	1716.05	4062.38
1205	Rad50	225.625	-1.32946	0.105145	-12.6441	1.20656e-36	1.90086e-35	300.898	115.064	298.924	125.369	317.667	117.416	107.423	242.625	145.813	361.781	132.411	388.111	327.365	120.182	333.431	141.01	348.842	151.982	323.42	112.763
1206	Ddx54	1149.16	1.28902	0.101951	12.6435	1.21594e-36	1.91405e-35	704.435	1682.95	625.527	1628.28	548.497	1323.45	1629.64	535.986	1682	816.992	1650.15	813.634	690.514	2095.07	552.995	1404.09	781.62	1473.33	597.429	1746.64
1207	Tcf19	148.131	-4.7399	0.374945	-12.6416	1.24505e-36	1.95825e-35	111.742	7.82862	163.217	6.57183	369.192	34.273	5.21808	129.417	4.12638	535.383	13.6286	434.991	170.339	3.37414	204.174	9.25913	413.024	10.2645	319.508	17.0958
1208	Foxn2	647.722	1.06405	0.0842205	12.6341	1.37009e-36	2.15313e-35	449.564	1085.63	460.516	1012.09	416.743	710.146	983.949	446.144	899.74	389.16	789.961	356.816	365.144	860.943	421.831	847.318	470.95	831.033	406.589	750.164
1209	Cct8	3608.02	1.08994	0.0862786	12.6328	1.39211e-36	2.18592e-35	1986.64	5120.08	2082.74	4600.14	2310.36	4824.91	5429.51	1806.44	4934.07	2612.87	4514.5	3035.34	2090.3	5308.16	2161.73	4846.18	2679.94	5174.97	2293.18	4348.38
1210	Stap1	1330.69	1.66208	0.131581	12.6316	1.41314e-36	2.21712e-35	465.491	1999.88	549.51	2144.95	711.364	2487.04	1779.21	469.488	2167.46	884.425	1698.89	970.476	539.438	2060.01	542.447	1953.72	735.793	1989.53	517.847	1946.85
1211	Slc35c2	803.761	-1.62064	0.128304	-12.6313	1.41986e-36	2.22581e-35	1194.05	363.205	1034.35	313.685	889.875	256.632	359.87	1149.27	370.883	1516.58	574.839	1033.81	1495.99	497.063	1271.43	413.838	1281.14	454.533	1251.31	352.85
1212	Tlr2	3590.61	1.64056	0.129987	12.6209	1.61878e-36	2.53555e-35	2481.37	4546.08	1590.92	5606.61	1160.61	4978.55	7595.24	1909.9	4577.42	1794.71	4560.38	1583.49	2280.14	5029.75	1604.14	4650.86	1512.83	6410.9	1529.23	6409.12
1213	Vmac	58.0451	-3.0901	0.244879	-12.6189	1.66098e-36	2.59951e-35	126.366	13.6275	122.543	10.8259	50.3417	4.12253	13.8256	121.237	12.9381	104.113	23.9094	74.6583	130.206	10.5907	125.844	8.70099	90.8155	15.1998	86.8995	14.1379
1214	Sncaip	62.603	-3.27308	0.259758	-12.6005	2.09774e-36	3.28036e-35	148.553	16.7336	65.7055	17.5429	152.899	11.7737	10.6899	92.6969	11.9566	113.335	7.47911	165.082	113.434	13.6285	51.0282	5.17543	102.414	8.30287	125.754	17.8757
1215	Plcb3	450.63	1.35754	0.107742	12.6	2.11277e-36	3.30114e-35	263.156	568.251	225.382	563.062	259.023	614.012	520.524	252.674	726.465	270.142	810.152	243.488	262.13	878.241	243.375	609.511	296.648	483.36	209.686	713.312
1216	Heatr9	22.0142	5.69777	0.452292	12.5975	2.17845e-36	3.40097e-35	0.870956	61.1236	0	51.9955	2.21052	47.4483	44.2595	0.489775	45.4488	2.8491	26.8367	1.1269	0	35.6031	0	20.9042	0	44.788	0	54.3301
1217	Rmnd1	282.744	-1.73733	0.137937	-12.5951	2.24615e-36	3.50377e-35	493.237	193.524	413.533	68.8896	376.174	143.438	137.571	425.461	118.941	395.69	107.959	415.869	517.384	165.17	374.397	144.893	496.117	156.15	430.126	80.3607
1218	Aldh1b1	180.271	1.65329	0.131286	12.593	2.30616e-36	3.59443e-35	91.6728	230.853	84.3652	338.695	72.9809	356.635	317.431	83.569	280.239	88.1469	205.751	90.521	113.556	227.669	73.663	196.148	84.5832	219.787	90.7914	358.354
1219	Fut11	347.546	-1.78606	0.141853	-12.5909	2.36842e-36	3.68844e-35	649.042	151.838	577.316	202.048	415.091	97.8394	207.019	572.588	164.758	535.607	97.9987	415.796	617.571	123.461	572.326	194.518	517.612	189.277	535.305	113.916
1220	Ubxn8	215.35	1.23365	0.0980663	12.5797	2.73024e-36	4.24843e-35	126.84	304.384	133.179	270.374	115.603	222.418	294	112.227	345.27	119.256	238.948	138.923	131.536	347.331	145.981	335.53	127.159	333.303	144.52	320.222
1221	Fzd1	38.5736	5.84803	0.465127	12.573	2.97241e-36	4.62147e-35	3.50807	30.363	1.80767	92.0995	1.10679	96.4976	170.033	0.48682	84.5004	0.944493	48.9887	0.163697	0	61.0871	1.20473	64.4831	0.429865	64.0543	6.32165	43.391
1222	Psme2b	196.965	1.56415	0.124408	12.5728	2.9804e-36	4.6301e-35	122.077	368.504	87.3489	297.002	57.7643	299.285	302.764	116.973	256.134	82.1225	265.468	86.586	126.319	315.066	122.159	287.834	96.9387	277.985	101.067	269.91
1223	Klra2	333.264	2.93639	0.233615	12.5693	3.11283e-36	4.83188e-35	31.8398	610.333	50.0055	473.878	111.772	870.26	703.584	58.9627	535.413	84.1352	461.986	177.861	46.6091	600.61	83.8347	670.11	76.8111	504.428	41.7244	471.123
1224	2510002D24Rik	62.7726	-2.21947	0.176591	-12.5685	3.14782e-36	4.88221e-35	103.209	19.5346	108.655	22.8987	102.028	43.5737	13.0565	92.7747	21.2437	89.4182	18.5368	97.8764	111.554	8.40176	114.464	25.9484	114.286	25.1671	103.178	19.6445
1225	Il16	208.788	-2.26051	0.180013	-12.5575	3.61712e-36	5.60551e-35	384.784	121.421	341.297	75.4642	296.902	112.024	38.6412	446.107	85.8135	326.722	36.903	297.196	392.275	50.0837	364.486	53.1469	271.124	53.2712	317.807	110.284
1226	2810474O19Rik	1449.31	1.25023	0.0995928	12.5534	3.80649e-36	5.89416e-35	918.271	1845.11	973.942	2601.51	869.758	2760.72	2404.73	814.486	1724.95	830.803	1536.73	891.933	830.919	2040.38	867.179	1839.39	815.176	1766.34	772.928	1880.86
1227	Ube2t	117.493	-3.06479	0.244284	-12.546	4.17863e-36	6.46512e-35	107.492	7.95632	182.823	17.1486	262.379	44.8906	23.1464	123.341	20.432	264.808	35.4451	285.687	165.147	12.2357	178.032	31.2527	286.603	34.7964	240.544	25.7061
1228	Zfp395	37.5336	-4.64698	0.370513	-12.542	4.39759e-36	6.79837e-35	66.7144	8.68243	103.73	4.46033	82.5287	9.39082	0	68.2123	2.32771	81.2952	0	44.7326	74.2188	1.27377	53.0535	0	59.374	1.94271	83.3066	5.42858
1229	Got1	415.863	-1.34708	0.107449	-12.5369	4.692e-36	7.24759e-35	628.94	239.041	603.457	193.158	511.608	198.964	198.255	523.17	245.248	659.665	202.027	673.82	617.637	224.062	592.117	217.948	581.764	363.358	588.212	254.814
1230	Polr3d	218.378	1.8107	0.144511	12.5299	5.12595e-36	7.91147e-35	90.6857	440.839	60.2927	283.875	97.8087	238.093	311.336	87.0549	399.641	128.98	318.021	139.372	74.089	363.23	82.149	316.671	106.974	386.799	93.8558	347.798
1231	Mcph1	173.667	-1.50406	0.120066	-12.527	5.31596e-36	8.19807e-35	234.114	64.2892	268.823	92.5832	203.789	95.5083	61.4084	294.407	89.3522	274.168	90.709	280.145	255.857	91.2949	221.795	111.159	307.485	116.14	239.989	80.3304
1232	Diap2	527.186	1.46331	0.116816	12.5266	5.33821e-36	8.22569e-35	272.229	938.873	334.501	701.075	199.318	746.08	835.508	326.739	1013.85	237.171	722.127	308.963	222.708	780.762	254.902	587.136	321.29	761.926	322.013	656.56
1233	Dip2b	261.495	-1.59597	0.127424	-12.5249	5.45926e-36	8.40539e-35	452.533	153.42	369.175	106.72	297.126	164.2	106.312	467.536	136.202	435.374	149.838	309.682	403.659	160.203	327.149	100.738	418.441	136.572	443.988	91.0355
1234	Pde4dip	229.61	-1.34623	0.107486	-12.5247	5.46766e-36	8.41152e-35	316.944	159.222	307.336	107.848	310.217	161.437	133.061	312.905	131.498	346.584	207.811	367.695	379.348	103.508	311.543	118.166	321.188	111.809	293.212	90.87
1235	Eya4	43.2663	-4.06648	0.324712	-12.5234	5.56315e-36	8.55148e-35	88.7524	0	53.675	4.46044	59.8336	9.41413	5.92156	88.115	1.93923	66.1204	0	136.501	93.4584	6.36989	96.4126	10.4023	70.5812	4.85468	68.5148	0
1236	Smpd2	106.8	-2.64218	0.210989	-12.5228	5.59958e-36	8.60052e-35	190.317	42.859	229.282	40.0351	149.159	36.8326	49.7656	162.708	18.6797	178.989	17.5349	146.387	268.105	8.44619	152.808	23.4322	165.724	30.5889	183.597	40.7567
1237	Agfg2	169.762	-1.98083	0.158197	-12.5213	5.70705e-36	8.75849e-35	242.223	37.0214	234.308	53.4058	254.046	88.9195	97.6493	247.583	65.2194	285.663	98.6666	321.993	251.292	86.9455	207.262	37.9498	346.777	66.9323	312.823	58.5625
1238	Xaf1	1927.42	4.03678	0.322543	12.5155	6.14452e-36	9.42225e-35	141.563	3141.52	113.67	4458.6	260.322	3763.57	4108.91	124.507	3506.74	112.863	2490	213.627	165.569	4163.68	815.269	3344.13	150.244	3087.89	120.928	4264.72
1239	Znrf1	410.493	1.52254	0.12168	12.5126	6.36684e-36	9.75529e-35	227.911	461.227	167.529	653.234	175.753	583.754	702.325	313.618	697.236	198.215	625.845	194.642	185.692	631.508	253.42	559.797	242.303	490.694	164.518	680.63
1240	R3hdm1	718.853	-1.36591	0.109226	-12.5053	6.98062e-36	1.06871e-34	1116.13	346.968	1058.3	339.281	945.369	433.715	415.665	934.437	471.487	953.533	349.984	1314.58	986.218	379.046	952.653	523.926	1102.65	480.252	1016.05	256.816
1241	Aurkb	286.249	-2.9557	0.236499	-12.4977	7.68299e-36	1.17529e-34	209.794	20.9667	394.552	51.752	527.179	75.0772	59.0755	431.559	54.3083	777.859	79.3855	627.018	367.034	40.2872	444.026	47.6978	673.424	123.808	620.848	99.3298
1242	Hilpda	339.872	1.8345	0.146848	12.4926	8.19729e-36	1.25296e-34	140.198	428.074	164.62	604.574	139.769	326.926	467.243	100.384	669.806	171.453	516.159	219.153	148.851	526.153	110.983	504.403	159.725	544.309	129.387	725.27
1243	Pmm1	104.069	-2.34675	0.188049	-12.4794	9.66609e-36	1.47627e-34	216.284	21.2498	149.207	18.6821	147.874	23.7654	24.3805	174.715	43.3003	246.673	60.3443	201.097	184.526	46.8948	107.935	36.5715	171.464	34.0104	140.819	31.5828
1244	Akirin1	1917.75	0.801398	0.06425	12.4731	1.04637e-35	1.5968e-34	1548.56	2562.53	1424.42	2468.84	1238.09	2159.76	2542.98	1309	2437.29	1338.8	2237.56	1328.21	1487.64	2811.91	1253.82	2362.58	1482.08	2539.27	1584.41	2237.26
1245	Gpr155	86.3043	-3.81665	0.306206	-12.4643	1.16872e-35	1.78209e-34	196.967	4.38696	187.233	12.3058	77.5593	17.5223	13.4048	181.808	4.97237	145.26	8.77482	87.9548	261.396	8.97949	172.705	18.932	127.932	4.40232	161.113	32.4789
1246	Rpp21	172.677	-1.11738	0.089665	-12.4617	1.20758e-35	1.83986e-34	195.89	117.976	225.573	108.695	232.841	94.6668	109.434	260.299	119.135	251.898	89.9313	223.288	238.033	103.998	241.967	102.151	259.271	113.985	239.014	125.49
1247	D930015E06Rik	250.108	-1.77807	0.142733	-12.4573	1.27558e-35	1.94192e-34	425.123	99.3729	395.493	130.156	376.682	177.344	104.069	453.352	148.272	417.388	108.492	366.757	342.361	101.566	396.849	92.5878	306.844	106.884	401.892	50.6837
1248	1810043G02Rik	150.723	-1.77532	0.142522	-12.4565	1.28933e-35	1.96126e-34	298.294	61.6843	215.378	46.3591	195.358	68.0231	92.6829	209.406	68.8863	243.236	40.1885	247.916	271.482	108.203	219.411	52.178	220.229	64.1295	210.402	81.0092
1249	4632428N05Rik	1098.05	-1.42566	0.114472	-12.4542	1.32653e-35	2.01625e-34	2428.99	560.746	1663.28	669.966	1168.84	526.825	634.98	1634.36	633.874	1516.27	537.053	1247.47	1904.18	668.445	1418.57	628.327	1408.16	526.172	1625.01	559.406
1250	Txn1	5194.72	1.23468	0.099142	12.4537	1.33499e-35	2.02747e-34	2625.55	7321.9	2997.77	8616.08	3150.28	6904.39	8046.75	2371.33	7258.6	3357.56	5330.74	4002	2829.29	7199.45	3265.68	9046.29	3195.6	6428.62	3193.37	6753.14
1251	Casp2	188.102	-1.53182	0.123003	-12.4535	1.33911e-35	2.03211e-34	265.575	107.031	314.801	87.9218	261.491	122.155	96.1454	316.249	103.155	294.482	57.4351	231.877	295.436	58.3924	283.189	95.8293	294.091	112.999	237.394	126.386
1252	Coro1b	5892.74	0.989772	0.0794883	12.4518	1.36725e-35	2.07316e-34	4653.24	8265.22	3772.5	7589.27	3042.98	7251.29	7159.62	3893.93	7964.52	4256.3	7813.45	3618.55	4959.18	8685.89	3873.96	7536.93	3541.88	7306.38	3864.5	8805.24
1253	Gm9574	24.3586	6.65819	0.534793	12.45	1.39821e-35	2.11841e-34	0	48.8771	0.603096	66.8956	0.550946	35.2685	70.3019	0	52.7641	0	36.2058	0.3077	0	64.6294	2.44565	38.1333	1.28266	33.4325	0	35.4735
1254	Snx4	1111.05	0.86515	0.0695961	12.431	1.77353e-35	2.6849e-34	802.904	1564.12	830.412	1678.73	726.407	1240.03	1445.34	790.846	1216.29	735.854	1388.9	802.447	670.74	1518.04	836.901	1298.6	828.039	1492.96	834.101	1519.41
1255	Nsmce4a	91.844	-2.3778	0.191349	-12.4265	1.8765e-35	2.83853e-34	162.635	15.2902	110.115	25.8457	142.157	43.0391	42.485	175.411	23.2416	176.129	49.5406	147.964	89.8251	26.0713	172.81	16.3777	168.04	33.5717	185.51	30.8211
1256	Ska2	134.816	-2.91955	0.23509	-12.4188	2.06563e-35	3.12213e-34	114.395	32.6041	188.44	17.3954	313.103	58.0951	28.6303	211.229	24.2231	262.446	56.4524	277.712	139.607	28.9765	224.727	22.7666	335.914	32.3645	301.241	26.0019
1257	Errfi1	391.727	1.8604	0.149865	12.4138	2.19882e-35	3.3208e-34	110.439	695.104	117.939	726.123	173.813	381.645	585.739	149.725	669.857	194.545	500.376	241.336	159.902	705.387	159.358	618.783	243.307	629.777	135.154	636.223
1258	Slfn5	3759.6	3.70338	0.29844	12.4091	2.33132e-35	3.51811e-34	417.967	6491.25	435.12	8863.32	404.403	6791.41	8310.12	404.13	5875.57	224.881	5936.78	437.059	500.816	6236.83	1853.19	5513.76	292.16	6175.38	397.42	9630.4
1259	Ube2j1	1047.37	1.0003	0.0806848	12.3977	2.69064e-35	4.05711e-34	637.522	1389.03	634.812	1265.86	705.477	1317.74	1289.07	607.148	1294.99	728.313	1310.04	760.528	584.98	1607.99	721.468	1289.63	847.72	1612.35	745.402	1597.27
1260	Vta1	1035.5	1.13236	0.0914252	12.3857	3.12467e-35	4.70783e-34	648.709	1802.59	621.119	1556.35	622.394	1307.97	1353.68	526.467	1430.84	569.044	962.57	727.894	736.003	1470.03	663.518	1369.33	721.296	1415.2	645.176	1559.81
1261	Axl	1695.89	3.17744	0.256702	12.3779	3.44183e-35	5.18157e-34	524.614	3491.11	219.292	2972.77	237.738	2422.32	6066.92	297.26	3167.75	184.518	2607.84	334.036	249.169	2614.92	921.806	2619.4	208.132	1926.92	204.208	2647.07
1262	Areg	22.7467	5.41621	0.437668	12.3751	3.56232e-35	5.35873e-34	0.863778	39.6094	1.20566	31.2018	1.10347	16.7981	58.86	0.49342	66.2124	1.91224	46.9948	0.315667	1.26987	43.1891	0	58.8881	1.71276	43.0106	3.18304	38.1105
1263	Plekhm1	1005.02	-1.40648	0.113665	-12.3739	3.61858e-35	5.43904e-34	1942.45	531.765	1552.8	505.569	1031.75	467.184	620.091	1597.5	540.217	1369.07	625.845	1005.07	1786.36	551.374	1618.39	514.338	1331.44	543.048	1354.6	611.506
1264	Sh2d1b1	85.5042	-3.75757	0.304132	-12.355	4.57524e-35	6.87155e-34	116.24	4.35174	143.422	10.3988	78.5282	15.9485	14.7694	166.997	4.65643	149.641	19.0041	180.837	98.2923	21.6257	207.601	1.04263	226.767	17.4976	221.607	10.8569
1265	Ppm1m	183.381	-1.87255	0.151595	-12.3523	4.73231e-35	7.10183e-34	279.2	64.9007	253.431	64.3168	331.233	76.9467	72.0257	248.532	64.0984	458.297	76.609	245.425	257.613	104.491	254.99	106.896	319.244	92.1216	241.736	55.5157
1266	Il12a	33.5061	6.00384	0.48697	12.329	6.32419e-35	9.48329e-34	1.7485	61.6267	0.469433	54.2607	2.50916	70.0446	152.35	1.15163	90.1082	0	33.527	0.681558	0	49.0686	0	61.6907	0.333544	36.5733	8.76048	45.218
1267	Slx4ip	240.399	1.67652	0.135991	12.3282	6.38633e-35	9.56891e-34	141.105	339.476	98.5746	279.82	97.6689	274.451	527.778	111.323	370.244	132.201	472.864	123.736	144.338	393.987	84.6442	410.673	99.525	315.405	114.116	276.061
1268	Dtx2	275.26	1.51826	0.123248	12.3187	7.18601e-35	1.07586e-33	176.236	521.921	121.053	487.119	140.077	425.264	397.183	110.793	419.466	153.838	330.96	145.399	172.887	446.029	143.241	299.609	137.589	278.998	122.54	474.999
1269	Ano6	754.783	-1.2805	0.103949	-12.3186	7.19511e-35	1.07637e-33	1210.48	520.218	945.524	439.759	819.813	406.886	529.52	1012.56	363.939	1097.01	432.631	1230.44	1137.11	406.07	949.082	312.933	1098.24	488.071	1169.28	526.094
1270	Fbxo5	98.9391	-4.36498	0.354425	-12.3157	7.45735e-35	1.11473e-33	67.6762	4.0837	159.595	1.39014	187.734	9.87754	6.90368	115.447	11.6302	326.659	0	257.081	128.956	5.94958	191.886	3.91095	267.148	27.3271	192.819	12.7085
1271	Rcsd1	982.239	1.59007	0.129128	12.3139	7.62847e-35	1.13941e-33	610.241	2334.64	466.076	1513.69	380.357	1054.26	1483.54	502.238	1556.38	600.537	1345.06	393.066	558.679	1698.15	419.785	1265.37	492.464	1121.24	469.784	1379.24
1272	Paox	102.825	-2.6621	0.216208	-12.3127	7.74309e-35	1.15562e-33	241.212	7.06602	217.015	38.5447	190.576	18.9604	44.3029	162.584	17.9409	132.584	25.8931	144.751	228.901	26.8587	194.276	22.4973	140.005	42.3187	119.552	40.6636
1273	Tmem144	83.1265	-3.17441	0.258079	-12.3001	9.04193e-35	1.34841e-33	139.846	8.70436	143.453	15.9881	130.091	7.93833	11.7963	167.889	5.15509	116.877	11.1939	155.1	182.608	33.9317	122.762	37.9056	141.424	21.3741	189.509	18.9833
1274	Slc41a3	263.606	-1.16194	0.0945805	-12.2852	1.08771e-34	1.6208e-33	378.897	130.54	393.286	193.01	286.268	132.665	166.772	365.198	158.64	380.048	186.369	316.06	428.035	185.87	382.498	156.361	347.635	152.566	371.327	160.068
1275	Ube2j2	450.287	1.08123	0.0880152	12.2846	1.09631e-34	1.63234e-33	364.221	629.437	283.305	671.815	258.154	554.271	591.336	244.08	689.647	308.833	467.971	287.91	285	630.355	312.025	612.157	302.465	541.809	253.594	717.352
1276	Dusp11	1029.14	1.31399	0.107026	12.2773	1.19912e-34	1.78402e-33	726.556	1143.86	522.282	1351.28	614.292	1838.22	1363.06	629.218	1504.38	523.32	1469.39	487.369	831.158	1655.1	579.784	1466.38	545.491	1339.64	458.647	1533.28
1277	Trim59	132.865	-2.56752	0.209159	-12.2754	1.22714e-34	1.82428e-33	136.011	14.5428	240.211	44.4115	285.864	61.6497	36.7179	183.223	39.6887	261.332	25.6604	268.455	137.549	22.0871	215.382	49.9022	314.557	26.8321	230.186	63.0455
1278	Themis2	2451.02	1.73422	0.141337	12.2701	1.31067e-34	1.94693e-33	1302.6	2881.09	1093.76	4707.84	871.318	5156.6	3636.75	1123.55	3138.62	1210.83	2786.66	997.298	1495.94	4181.17	1297.68	2641.28	923.812	3153.26	1020.83	5399.55
1279	Map2k6	31.0425	-3.98759	0.32507	-12.2669	1.36442e-34	2.02518e-33	68.7723	0	46.3452	0	62.5109	14.7529	3.41521	52.6216	3.82903	60.5511	9.31726	57.838	58.0655	2.37066	47.7975	0	52.7793	5.44598	71.9058	2.53237
1280	Pygb	812.353	-1.16424	0.0949372	-12.2632	1.42724e-34	2.11677e-33	1128.02	535.305	1058.21	483.643	919.908	411.167	437.448	1090.36	444.098	1478.54	549.293	923.041	1149.85	480.023	1149.85	562.312	1244.85	511.464	1074.28	615.386
1281	Map4	2844.93	1.10125	0.0898428	12.2575	1.53207e-34	2.27048e-33	1811.78	4187.21	1617.71	4514.29	1355.7	3487.81	4113.22	1568.92	3974.62	2342.1	3669.11	1836.62	1803.39	3826.47	1736.47	3287.9	2176.25	3672.96	1839.04	4077.06
1282	Zfp763	39.1234	-3.06549	0.250102	-12.257	1.54145e-34	2.28259e-33	60.664	0	78.1097	5.98118	66.421	9.68523	4.76078	87.9429	10.833	46.4393	12.1742	61.7209	53.5075	11.0988	75.456	14.4094	71.8001	5.4738	99.4359	6.55349
1283	Wee1	41.7554	-2.95883	0.241446	-12.2546	1.58684e-34	2.34799e-33	52.5634	8.6854	76.5331	19.313	83.5498	13.3654	5.91249	71.6416	6.59242	82.2539	15.1184	92.3965	62.6183	10.1805	49.4291	9.36904	90.2516	7.76902	74.852	2.71293
1284	Eif3d	1545.02	1.00081	0.0817031	12.2493	1.69399e-34	2.50457e-33	940.691	2121.27	907.506	1931.04	898.507	1945.97	1985.66	861.776	2255.75	1222.91	2015.48	1321.45	1120.29	2100.39	907.941	1950.94	1106.99	2118.26	1003.89	2183.73
1285	Cmtm4	77.2816	-2.00274	0.163593	-12.2422	1.84988e-34	2.73293e-33	137.148	25.9755	101.242	28.2285	93.0287	31.0002	31.0773	127.322	37.967	161.252	41.2321	90.8713	133.12	25.4648	115.536	28.0417	141.964	29.0907	138.961	27.1096
1286	Ostm1	884.842	-1.33183	0.108802	-12.2409	1.87882e-34	2.77353e-33	1342.78	462.858	1327.69	463.778	878.377	408.067	527.661	1387.18	472.192	944.145	564.673	1049.43	1450.96	589.125	1468.43	494.188	1440.72	578.842	1378.6	467.14
1287	Psmd6	1317.72	0.79882	0.065271	12.2385	1.93539e-34	2.85481e-33	885.46	1648.96	846.194	1796.18	951.774	1639.56	1835.39	837.793	1565.25	1031	1579.39	1134.61	1021.86	1798.45	915.472	1652.05	1044.76	1645.55	950.899	1573.82
1288	Kpna4	866.549	1.54929	0.126614	12.2363	1.98844e-34	2.93079e-33	361.194	1100.44	364.533	1290.62	380.673	910.958	1565.78	620.729	1610.45	398.832	1461.07	399.756	404.683	1185.51	475.151	1416.79	556.787	1427.94	456.077	943.018
1289	Mbd4	87.2164	-2.19683	0.179578	-12.2333	2.06485e-34	3.04104e-33	137.302	56.3575	108.453	34.113	153.085	56.7304	21.4264	160.051	30.3185	162.954	21.8356	121.761	121.811	22.2965	162.707	17.3224	160.562	35.5614	136.959	22.7217
1290	Hectd3	448.511	-1.50659	0.123223	-12.2265	2.24459e-34	3.30319e-33	617.785	220.07	647.003	231.207	586.079	204.68	179.459	733.044	212.209	679.928	279.01	401.809	936.73	245.259	720.819	244.674	681.534	255.711	629.429	263.788
1291	Itgb1	4149	0.928091	0.0759157	12.2253	2.27759e-34	3.34918e-33	2474.73	4812.94	3113.55	5936.36	3154	4306.56	6159.39	2733.77	5667.91	2695.26	5447.9	2577.65	2567.73	5980.89	3049.03	5560.29	3353.04	5268.97	2874.34	5245.79
1292	Mob1a	3851.54	0.667284	0.0545936	12.2228	2.34959e-34	3.45236e-33	3047.15	4366.58	2975.67	5107.36	2601.82	5322.69	4563.13	2827.76	4617.83	3079.07	4486.52	3235.41	2745.46	4414.14	3201.73	4557.76	3129.78	4975.27	2930.97	4844.8
1293	Chaf1b	215.326	-2.80109	0.229173	-12.2226	2.35441e-34	3.45678e-33	243.444	31.9612	289.601	38.1839	339.625	71.7419	35.291	228.974	43.9792	570.524	57.5187	551.191	227.726	70.3869	321.308	36.8548	533.213	96.3168	461.962	56.7116
1294	Lmnb2	154.198	-2.63755	0.215872	-12.2181	2.48695e-34	3.64855e-33	173.474	36.9508	217.051	44.3526	268.61	36.6689	13.9779	160.062	40.5218	389.548	53.7676	362.785	186.937	36.7251	231.563	44.5493	347.509	56.054	312.659	70.196
1295	Acot13	447.671	-1.38407	0.113347	-12.2109	2.71842e-34	3.98506e-33	638.675	124.665	659.792	261.099	620.794	237.048	302.485	625.481	231.453	619.284	206.369	660.301	682.673	202.252	813.064	324.802	528.564	286.952	657.719	269.942
1296	Pvr	353.538	1.25562	0.102879	12.2048	2.92849e-34	4.28969e-33	186.616	534.414	231.572	509.594	209.006	341.764	437.58	164.497	554.793	195.986	524.153	230.442	177.327	561.873	248.194	530.615	233.51	547.902	210.23	440.701
1297	Mpp1	5623.88	0.989093	0.081051	12.2033	2.98308e-34	4.36629e-33	4536.96	6768.72	4124.46	8430.48	3124.1	7279.42	7968.26	3872.79	7194.56	3322.59	6933.52	3327.97	4374.95	7801.97	3982.84	7009.33	3385.74	6571.46	3640.2	8827.19
1298	Clint1	452.476	1.17235	0.0960691	12.2032	2.98783e-34	4.36988e-33	264.507	627.291	287.948	676.304	202.298	732.615	543.809	294.105	735.831	285.965	629.067	259.4	268.554	600.057	339.823	525.054	318.607	663.838	268.166	526.287
1299	Adamts10	179.849	-2.05004	0.168	-12.2026	3.00922e-34	4.39777e-33	343.103	64.3138	264.739	48.1055	234.606	107.529	112.719	334.566	64.8225	315.151	36.6295	205.577	321.601	49.9364	323.829	66.0105	274.554	56.628	261.875	110.692
1300	Tox2	125.966	-4.3351	0.355414	-12.1973	3.2114e-34	4.68963e-33	188.44	16.1927	203.29	5.18884	496.084	43.4298	1.29023	112.573	15.0183	217.505	3.30879	342.277	175.827	9.99916	181.206	14.7739	249.267	5.9386	232.972	4.7389
1301	Aff1	1199.91	1.29879	0.106483	12.1972	3.21764e-34	4.69514e-33	786.697	1756.93	612.029	2130.31	478.269	1611.74	1893.33	735.518	1614.72	844.133	1518.06	892.448	642.334	1496.42	640.128	1455.51	661.165	1610.78	638.483	1979.27
1302	Dnajb1	633.177	1.04015	0.0852833	12.1964	3.24992e-34	4.73859e-33	427.108	821.458	371.214	882.438	344.639	754.768	914.665	377.995	954.206	495.762	878.84	464.034	424.084	1000.09	384.761	784.369	456.293	690.747	397.608	838.458
1303	Polr2c	903.249	1.01208	0.0829848	12.1959	3.26687e-34	4.75965e-33	547.117	1290.94	509.172	1191.21	482.633	949.254	1089.09	560.021	1216.98	693.652	1242.55	685.444	668.188	1236.51	604.139	1260.57	646.483	1241.7	585.059	1364.27
1304	Rab40c	172.865	-2.37567	0.194844	-12.1926	3.40217e-34	4.95298e-33	330.864	72.2039	294.418	53.3001	167.96	42.6054	27.2177	320.014	91.5019	293.603	55.9601	169.297	378.758	60.4385	344.333	42.8029	262.965	54.8404	338.553	55.6651
1305	Nfkbid	275.49	1.67528	0.137435	12.1896	3.52967e-34	5.13465e-33	125.861	364.222	85.0329	428.338	144.181	442.654	342.038	104.271	492.634	166.315	431.672	191.544	138.512	491.12	107.725	445.317	151.216	349.963	96.6081	410.566
1306	Slc25a17	644.447	1.01578	0.0833496	12.187	3.64597e-34	5.29978e-33	370.51	825.992	459.771	932.805	371.215	646.444	777.06	406.885	814.369	495.196	922.812	390.143	463.602	977.498	437.957	848.273	458.91	927.294	411.305	950.903
1307	Foxp1	1459.78	1.61942	0.132983	12.1777	4.08807e-34	5.93787e-33	638.166	1976.09	639.088	2465.77	856.78	3254.86	1552.86	633.574	2108.44	749.339	1846.65	928.081	735.057	2661.05	568.985	1947.71	845.681	1656.95	570.598	2559.82
1308	Ap3b1	1710.18	0.804529	0.0660791	12.1752	4.21178e-34	6.11288e-33	1385.53	2152.12	1315.53	2060.59	959.096	2089.88	2266.71	1214.01	2080.32	1278.27	2145.61	1246.02	1399.96	2410.6	1190.55	2007.84	1239.8	2129.78	1225.61	2405.88
1309	Dnajc28	57.5943	-3.45115	0.283477	-12.1744	4.25688e-34	6.17361e-33	129.451	14.0643	158.302	6.98431	55.8517	16.1186	11.9123	106.124	10.6785	116.368	5.07807	47.5434	168.803	8.05433	88.2147	10.0631	72.0831	6.52251	114.204	5.46624
1310	Atraid	513.923	-1.66297	0.136732	-12.1622	4.9397e-34	7.15842e-33	901.31	146.111	919.183	308.787	661.694	241.222	287.297	857.813	204.064	664.883	239.181	504.788	961.163	205.506	883.502	230.177	677.679	334.246	796.564	253.292
1311	Plk3	174.782	3.43294	0.282354	12.1583	5.18406e-34	7.5068e-33	24.3224	431.436	4.3882	140.216	30.2464	176.844	269.207	16.6268	346.772	60.1091	483.153	34.2439	23.929	428.762	27.0676	252.177	44.6828	272.484	29.3978	399.583
1312	Haghl	187.193	-1.71788	0.141323	-12.1557	5.34901e-34	7.73976e-33	332.803	92.2636	239.944	55.0978	272.058	72.2584	80.284	300.42	76.7793	326.06	93.9373	227.433	269.202	72.4476	303.9	74.2029	289.587	141.312	300.893	122.97
1313	Miip	230.208	-1.88138	0.154818	-12.1522	5.58541e-34	8.07566e-33	449.47	88.4963	404.991	148.963	251.214	108.756	65.9435	391.653	80.1002	329.711	104.231	319.134	445.391	115.28	305.025	67.9079	310.816	124.317	416.75	76.0074
1314	Gm4951	189.349	4.93542	0.406206	12.15	5.73436e-34	8.28471e-33	6.99441	261.021	10.2445	359.504	12.7204	454.925	494.837	1.95261	341.826	5.68105	326.589	18.6842	7.66043	456.71	47.0639	315.841	1.71811	292.554	9.49602	360.967
1315	Cct4	2758.96	0.619336	0.0509746	12.1499	5.74475e-34	8.2934e-33	2167.61	3369.84	2151.08	3195.14	1926.19	3222.13	3154.32	2006.25	3402.59	2099.94	3245.98	2468.3	2316.36	3470.66	2179.22	3551.45	2261.45	3594.13	2190.01	3206.53
1316	Akap5	70.3195	2.22139	0.18292	12.144	6.16971e-34	8.90014e-33	19.7848	150.731	30.5623	104.895	35.238	149.935	148.61	25.1372	113.662	30.9543	123.126	27.835	16.5438	106.347	11.9702	72.3142	20.1036	87.7637	23.0347	107.841
1317	Wdhd1	118.433	-2.83678	0.233608	-12.1433	6.22429e-34	8.97206e-33	141.093	5.20853	165.414	38.6438	237.523	22.5122	27.1349	131.777	25.4945	301.237	23.2428	277.747	145.769	16.0285	167.098	27.3862	305.973	48.7254	210.709	49.9345
1318	Rnf4	2067.91	0.844835	0.0695963	12.1391	6.55595e-34	9.44296e-33	1458.26	2699.31	1400.42	2958.71	1352.19	2205.66	2877.97	1406.48	2597.29	1444.73	2242.8	1564.56	1491.5	2814	1327.17	2609.05	1610.88	2597.34	1739.08	2960.88
1319	Mcm4	371.205	-2.59963	0.214173	-12.138	6.64616e-34	9.56564e-33	339.141	82.4885	437.505	98.0512	727.1	129.741	87.2185	372.733	74.4492	912.146	109.527	1091.61	406.439	96.7195	467.696	97.8341	942.997	148.563	674.636	127.5
1320	Ubr7	247.232	-1.35832	0.11194	-12.1344	6.94062e-34	9.98188e-33	372.203	65.1591	371.215	133.704	321.45	122.867	134.495	341.728	162.11	402.857	147.517	368.16	355.21	127.25	320.737	119.741	367.849	204.936	361.657	143.795
1321	Trim12a	489.604	1.53747	0.126729	12.132	7.14835e-34	1.02728e-32	308.632	744.37	257.52	877.601	171.02	905.847	719.637	232.116	652.538	219.466	554.694	185.691	274.683	708.727	375.841	725.323	233.094	708.93	263.17	673.186
1322	Sfxn3	513.367	-1.17336	0.0967221	-12.1312	7.21492e-34	1.03607e-32	847.083	321.46	667.971	253.83	590.269	266.257	307.058	694.154	333.337	683.644	393.963	769.201	816.021	350.864	773.834	378.935	641.304	286.4	626.037	265.716
1323	Vps37c	1010.68	1.53833	0.126889	12.1234	7.93651e-34	1.13883e-32	511.537	1518.09	445.333	1830.21	397.663	1116.4	1361.97	466.132	1481.32	764.023	1283.15	415.575	528.604	1825.61	639.543	1909.47	576.877	1316.9	441.013	1384.12
1324	Paics	1399.33	-1.00085	0.0825579	-12.123	7.97878e-34	1.14403e-32	1761.91	816.63	1739.54	811.776	1785.21	986.157	955.905	1688.82	776.996	1980.48	1009.38	2215.46	1667.59	896.492	1780.55	1024.99	2168.29	1150.57	1874.56	895.275
1325	Pip5k1a	370.597	1.12314	0.092709	12.1147	8.82816e-34	1.26486e-32	256.063	411.443	214.221	452.273	232.324	610.45	584.921	246.075	526.504	203.087	491.082	196.602	298.379	532.845	247.128	517.197	257.715	459.088	196.21	478.324
1326	Pdgfa	52.5311	-2.80506	0.231594	-12.112	9.126e-34	1.30655e-32	130.525	4.92008	65.0822	14.1257	74.3037	8.70911	11.7962	93.2338	20.2703	109.064	10.9223	86.8516	64.3324	10.2056	112.529	15.6878	105.547	9.83506	88.1757	14.5054
1327		669.005	-1.64124	0.135591	-12.1043	1.00178e-33	1.43206e-32	1073.87	248.064	953.084	268.904	1003.42	538.054	337.701	1167.29	294.948	972.234	374.446	844.675	1323.3	243.638	867.821	317.25	753.039	283.977	1178.78	335.606
1328	Coasy	292.459	-1.36406	0.112692	-12.1043	1.0017e-33	1.43206e-32	453.001	121.249	352.061	124.136	375.189	130.408	170.45	412.953	138.026	459.753	223.354	384.141	532.407	205.145	436.977	179.277	377.399	180.055	427.775	165.429
1329	Rtn1	140.878	2.61787	0.21629	12.1035	1.01233e-33	1.44605e-32	37.1557	235.263	47.6756	373.432	17.4937	158.111	132.063	30.2535	298.126	45.6898	289.204	47.1239	64.8365	298.318	44.3232	204.605	32.3939	145.784	33.5105	282.202
1330	St3gal5	731.113	2.53671	0.209593	12.103	1.01798e-33	1.45303e-32	116.823	905.164	181.631	1639.66	157.206	682.391	1216.06	178.047	1296.09	390.174	1515.44	162.809	147.9	1275.91	187.066	1036.14	406.207	1220.85	220.616	1686.06
1331	Lmnb1	148.34	-2.76096	0.228521	-12.0819	1.31689e-33	1.87827e-32	150.696	12.0798	189.747	28.8913	312.477	55.5171	35.9077	174.863	30.1779	390.899	49.1629	332.654	209.341	31.813	155.295	32.7211	379.312	42.7048	285.249	67.2897
1332	Kdelc2	136.282	-1.40543	0.116345	-12.0798	1.34991e-33	1.92393e-32	204.204	73.7996	194.648	66.8532	190.356	111.04	73.9163	203.648	75.6106	171.075	75.5196	201.801	161.049	50.9057	204.909	74.9323	224.365	75.7351	223.465	67.8176
1333	Tm9sf4	1958.81	0.927327	0.076768	12.0796	1.35383e-33	1.92806e-32	1391.7	2400.23	1311.8	2641.08	1184.89	2567.62	3071.57	1142.87	2502.1	1409.61	2605.95	1486.97	1664.19	2403.42	1456.4	2526.88	1359.67	2349.02	1101.07	2599.07
1334	Uba1	4227.2	0.831104	0.0688882	12.0645	1.62556e-33	2.31331e-32	3141.23	5302.92	2769.93	5002.73	2588.31	5200.02	5823.12	2608.77	5434.92	3295.79	5705.96	3654.66	3203.67	5864.14	2960.84	5038.15	3101.58	4824.57	3089.02	5933.66
1335	Cd52	4672.67	1.56733	0.129941	12.0619	1.67936e-33	2.38808e-32	2514.22	7814.91	2055.05	8297.42	2195.09	6383.1	5957.77	2100	7203.85	2506.66	4957.5	1963.42	2544.15	8436.7	3794.95	8397.29	2010.1	5276.22	1906.03	7138.89
1336	Jag1	277.85	2.02038	0.167543	12.0589	1.74185e-33	2.4751e-32	82.4834	440.868	78.9411	377.897	131.524	258.296	502.202	76.3735	523.594	116.503	494.359	190.431	100.132	425.43	107.196	553.103	118.766	523.775	91.6987	363.42
1337	Pak1ip1	696.65	0.89935	0.0745881	12.0575	1.76982e-33	2.51296e-32	468.54	826.311	412.648	821.522	415.771	838.8	961.355	442.664	972.429	529.11	970.553	547.662	530.825	989.05	486.279	921.502	550.179	949.663	487.866	810.267
1338	Dars2	122.636	-2.16972	0.180062	-12.0499	1.94211e-33	2.75553e-32	150.519	40.6742	177.85	49.1632	198.808	31.3728	23.7821	169.303	38.388	218.993	74.4025	245.923	229.892	35.1155	143.664	64.408	241.23	65.5283	219.774	33.933
1339	Etv6	467.768	1.47175	0.122148	12.0489	1.96489e-33	2.78577e-32	201.55	984.417	273.095	760.22	296.754	829.323	773.386	255.227	657.658	231.634	407.202	300.045	236.883	597.79	215.619	582.507	229.331	645.283	223.352	654.077
1340	Dyrk2	361.018	1.87598	0.155711	12.0478	1.99094e-33	2.8206e-32	173.95	589.143	179.584	725.018	75.2973	452.112	563.698	181.854	765.686	110.388	484.337	111.427	194.498	547.436	179.384	518.493	161.291	543.186	186.387	477.198
1341	Gspt1	385.482	1.59918	0.132832	12.0391	2.21447e-33	3.13494e-32	151.096	370.993	218.056	568.335	146.777	438.504	532.465	197.873	702.462	213.107	767.074	252.615	175.582	567.569	156.056	516.29	189.671	737.991	207.561	599.554
1342	Ap1s2	756.796	-1.28931	0.107125	-12.0356	2.3096e-33	3.26718e-32	1073.35	454.266	1176.9	423.441	1053.81	336.093	530.896	1240.49	426.942	678.589	427.748	948.693	956.005	461.824	1274.9	439.802	1177.46	491.653	1162.11	400.977
1343	Zbtb8a	61.576	-2.13672	0.177581	-12.0323	2.40312e-33	3.39693e-32	105.653	17.4212	84.9679	25.2536	74.6414	33.153	23.6236	74.7657	21.3473	136.475	15.2369	96.0511	107.182	17.8068	103.847	22.9519	105.625	18.4768	117.179	29.8622
1344	Pdzd11	692.148	1.04001	0.0864812	12.0259	2.5987e-33	3.67067e-32	349.39	909.626	467.194	1048.14	503.789	788.561	1076.03	388.793	885.328	496.11	796.552	491.604	401.629	968.297	484.465	997.248	467.252	815.216	478.812	1028.92
1345	Cox18	169.819	1.72092	0.143118	12.0245	2.64051e-33	3.72695e-32	83.1541	163.501	56.8163	323.394	78.1046	336.832	262.432	54.1062	228.643	83.114	248.228	109.165	71.8601	289.283	88.8999	272.944	96.9271	241.966	68.6442	238.357
1346	Hmgcr	1900.39	1.51684	0.126224	12.017	2.89153e-33	4.07822e-32	783.118	2888.53	917.819	3273.16	1357.87	2750.53	3311.79	715.991	2652.7	824.615	2371.43	1545.43	832.944	3020.99	899.492	2459.49	1024.45	2791.74	931.534	2654.1
1347	Arhgap24	161.882	-2.29938	0.191373	-12.0152	2.95668e-33	4.167e-32	344.073	54.41	341.332	51.1804	134.645	66.4462	57.3584	318.193	42.192	245.859	59.5173	151.417	277.364	47.3408	262.343	33.6099	310.515	64.8556	293.076	81.9147
1348	Ep400	1156.76	1.35466	0.11276	12.0136	3.01448e-33	4.24532e-32	723.961	1710.45	533.856	2138.42	611.494	1728.52	2013.89	660.304	1398.58	743.795	1704.75	834.649	500.101	1688.5	714.14	1276.79	623.09	1285.53	550.102	1694.37
1349	A230046K03Rik	1837.76	0.985536	0.0820509	12.0113	3.10032e-33	4.36298e-32	1329.89	2629.85	1312.53	2524.19	1018.69	2070.05	2957.41	1336.36	2450.22	985.112	2148.4	1130.93	1365.22	2490.14	1208.83	2477.39	1312.63	2558.97	1341.66	2106.79
1350	Casp9	440.463	-1.41997	0.118238	-12.0095	3.16933e-33	4.45678e-32	818.483	261.648	603.02	242.225	437.407	232.706	250.842	595.411	247.802	606.037	248.864	573.294	943.718	274.794	595.377	221.786	649.186	223.543	592.396	190.728
1351	Kcnab2	619.261	-1.45724	0.121349	-12.0087	3.19934e-33	4.49566e-32	805.783	376.034	854.532	317.613	1048.02	184.592	302.437	807.225	351.096	1110.43	363.143	898.446	791.656	298.759	1020.49	368.89	930.417	307.323	783.781	464.559
1352	Gm12250	1001.73	5.33558	0.444372	12.007	3.26339e-33	4.58226e-32	21.6102	1722.41	15.0631	2674.63	70.0541	2084.02	2195.28	15.2725	1758.59	13.3664	1268.25	63.5998	35.5586	2148.61	212.344	1812.58	12.4156	1661.03	27.5581	2222.32
1353	Fam214a	64.4246	-4.76372	0.396773	-12.0062	3.29766e-33	4.62695e-32	202.248	4.4579	215.783	3.05184	58.2792	10.9993	5.23686	72.8379	6.37175	120.63	3.8761	62.5396	158.645	3.9216	60.0232	2.13754	187.955	0	103.925	5.57225
1354	Ccnj	107.345	2.01616	0.168056	11.997	3.6855e-33	5.16732e-32	45.6177	121.448	36.7378	223.322	56.4119	184.749	158.1	39.4298	131.097	25.4986	181.856	36.9314	68.9879	240.719	39.7467	160.23	44.6775	125.163	33.7061	192.474
1355	Dnajc9	317.002	-2.83846	0.236633	-11.9952	3.76466e-33	5.27442e-32	293.699	13.1217	477.24	90.6045	572.719	116.684	79.5975	427.796	55.1854	765.65	65.5114	750.407	411.204	35.5863	537.404	80.5878	738.775	143.24	600.792	84.2382
1356	Aim1	376.012	2.04801	0.170871	11.9857	4.22385e-33	5.9134e-32	86.9966	381.127	88.5866	781.478	118.489	605.865	548.948	143.412	641.645	196.209	446.533	202.758	126.694	700.234	164.917	557.887	195.283	521.793	141.093	870.3
1357	Tgfbr1	885.889	-1.47699	0.123384	-11.9706	5.06576e-33	7.08684e-32	1613.21	626.328	1507.11	544.891	1070.47	549.339	485.622	1403.78	368.686	988.515	421.712	1190.07	1221.05	325.831	1178.97	364.213	1290.7	491.19	1534.94	541.14
1358	Avpi1	83.7164	-2.93745	0.245469	-11.9667	5.30979e-33	7.42276e-32	127.543	21.4268	135.507	14.4049	160.629	6.19673	8.54699	117.192	12.8564	159.892	66.3273	215.323	159.505	14.7691	135.768	23.5253	126.045	32.2896	115.445	21.1359
1359	Igf2bp2	131.457	3.42117	0.28609	11.9584	5.86909e-33	8.19858e-32	26.5049	318.904	12.7458	289.541	33.6988	221.709	135.416	8.41353	204.373	44.994	364.683	22.8331	24.2768	161.234	11.484	133.506	11.4923	133.174	33.7592	436.407
1360	Utp11l	684.271	1.30619	0.109258	11.955	6.11116e-33	8.53046e-32	337.098	1183.08	406.087	989.329	440.369	983.462	995.455	299.831	924.159	343.665	780.124	601.164	384.194	937.73	351.76	1072.47	388.022	906.86	377.064	983.491
1361	Mknk2	291.784	-2.57828	0.215712	-11.9524	6.30614e-33	8.79616e-32	587.377	30.4197	545.974	50.5101	278.266	45.3583	84.231	520.827	137.306	484.346	159.035	336.316	677.056	82.7068	493.272	66.6584	424.52	95.2014	654.899	81.4008
1362	Lhpp	149.382	-1.45977	0.122146	-11.951	6.4154e-33	8.94199e-32	229.286	59.2095	231.74	75.7221	227.271	96.0931	121.119	185.745	68.2575	258.338	59.6375	207.26	212.9	71.2616	209.475	65.776	243.091	95.1606	196.742	73.5597
1363	Tmem198b	124.148	-2.31153	0.193455	-11.9487	6.59588e-33	9.18681e-32	236.434	71.1936	206.875	15.1776	156.946	57.6193	37.7141	230.358	50.362	252.049	31.1306	142.812	260.368	37.6868	202.206	21.5461	206.846	46.6969	165.019	53.9188
1364	Cnrip1	376.023	-3.10702	0.260157	-11.9428	7.07582e-33	9.84804e-32	1078.8	68.3318	1053.51	82.2407	343.912	87.7185	56.1083	808.976	42.1699	312.52	125.997	280.224	1176.06	80.2974	586.196	79.0741	371.023	81.1266	717.661	88.4975
1365	Slc6a6	13823	-1.19798	0.100327	-11.9408	7.25366e-33	1.00882e-31	24309	8113.48	19984.4	9304.9	15026.4	6180.67	7542.69	21407.1	9007.19	17625.8	8353.26	14891	22704.1	9340.83	18933.8	8345.6	19152	7627.79	18501.6	10107.9
1366	Pomp	1894.17	0.964926	0.0808109	11.9405	7.2745e-33	1.01097e-31	1303.51	2691.3	1234.06	2851.77	1293.83	2397.29	2726.41	1087.17	2374.88	1281.7	1798.27	1492.23	1244.73	2778.02	1456.48	2657.26	1162.21	2270.94	1286.5	2494.82
1367	Zbed3	79.9461	-1.86916	0.156548	-11.9399	7.33269e-33	1.01832e-31	109.743	34.9192	134.981	29.7083	103.886	25.0476	33.9299	125.353	32.2364	168.059	42.1525	99.1889	113.429	26.6997	134.199	43.8895	152.317	41.8596	112.014	35.3094
1368	Setd8	243.426	1.72403	0.144396	11.9395	7.36263e-33	1.02173e-31	115.693	237.503	99.5634	323.748	96.9902	290.956	471.888	97.8774	498.278	89.7033	291.361	108.233	120.509	441.055	142.342	332.65	164.204	430.799	104.886	410.278
1369	H2-Q7	242.12	1.86365	0.156114	11.9377	7.52332e-33	1.04326e-31	112.307	711.268	103.135	460.841	113.69	284.167	242.119	105.713	466.323	94.3963	251.675	102.387	113.694	397.468	108.776	365.98	92.0861	276.844	91.1847	348.349
1370	Slc39a7	2346.72	1.02846	0.0862169	11.9287	8.38678e-33	1.16215e-31	1727.75	3413.88	1413.82	2842.81	1296.51	2238.26	3247.66	1416.07	3250.01	1772.84	3319.38	1702.04	1686.76	3452.79	1443.97	3156.4	1509.47	2900.36	1461.74	3681.79
1371	Suco	426.007	1.92181	0.161129	11.9271	8.54726e-33	1.18352e-31	140.009	730.876	117.055	693.435	129.992	467.382	717.662	164.323	694.186	256.073	731.517	190.819	214.162	663.954	129.252	776.148	152.837	769.133	306.779	474.554
1372	Ppp1cb	611.006	1.68379	0.141334	11.9135	1.00605e-32	1.39205e-31	233.969	1111.37	326.401	778.115	271.259	671.144	1315.94	326.69	1081.76	255.996	944.238	268.615	221.262	835.04	356.565	917.04	375.717	1109.58	261.641	557.789
1373	Klhl42	74.0676	-2.88823	0.242478	-11.9113	1.03381e-32	1.42942e-31	157.27	30.3215	106.063	2.97139	121.807	24.2246	28.1116	173.091	15.8869	140.571	7.50778	119.665	108.769	28.0087	123.999	3.11704	118.712	22.3087	132.679	16.2679
1374	Cdkl2	82.93	-1.73133	0.14538	-11.9091	1.06179e-32	1.46703e-31	123.1	32.9617	159.331	38.6782	119.791	39.2269	51.4031	143.901	35.7801	127.782	46.0837	120.956	98.1873	40.1979	141.354	27.9461	132.023	50.4803	108.934	20.4828
1375	Ccl17	34.2717	8.03989	0.675151	11.9083	1.0716e-32	1.47951e-31	0	84.0475	1.20173	94.5908	0	11.0277	76.6469	0	94.992	0.981965	28.0421	0	1.25048	82.4375	0	76.0228	0	58.0527	0	76.1403
1376	Fam69a	215.715	-1.53547	0.128987	-11.904	1.12753e-32	1.5556e-31	241.949	128.301	321.396	74.0344	369.966	94.3058	172.079	319.3	97.9994	283.801	144.174	308.386	298.227	102.491	322.011	124.396	331.219	99.6438	389.165	91.4616
1377	Slc30a7	834.469	0.936959	0.0787325	11.9005	1.17586e-32	1.6211e-31	676.324	1263.73	579.731	1201.95	456.321	1049.56	1121.88	611.639	1042.05	493.05	936.269	546.377	558.178	1252.94	631.723	1017.56	566.192	1060.67	609.438	1013.82
1378	Calhm2	133.007	-2.31705	0.194736	-11.8984	1.20582e-32	1.66119e-31	277.717	26.2292	211.811	52.2145	151.048	26.5779	48.9407	256.783	48.1372	304.453	49.6602	161.162	250.536	71.5368	191.545	42.939	188.464	54.2282	235.257	10.9038
1379	4930506M07Rik	381.013	-1.41395	0.11893	-11.8889	1.35227e-32	1.8616e-31	506.007	164.349	600.984	211.75	516.973	188.244	261.073	599.623	248.547	554.666	225.543	365.88	543.557	177.599	642.475	213.614	662.294	228.491	568.006	140.583
1380	Cpped1	317.842	-1.27816	0.107523	-11.8873	1.37819e-32	1.89591e-31	463.107	149.584	421.425	175.767	369.787	253.135	165.067	422.492	194.814	437.647	143.593	492.571	444.21	173.79	534.729	141.642	484.715	230.028	449.007	209.735
1381	Fen1	503.159	-2.2004	0.185234	-11.879	1.52105e-32	2.09092e-31	514.291	99.9757	675.538	178.284	809.444	146.923	218.801	514.099	166.457	1192.73	118.293	1238.02	703.631	182.219	635.936	194.679	1139.01	262.606	857.045	215.196
1382	Zcchc24	40.401	-3.4604	0.291514	-11.8704	1.68607e-32	2.31609e-31	64.9626	18.1134	66.6588	6.20123	79.118	2.79506	1.5429	82.3318	11.3281	93.6686	11.8087	70.4966	53.3629	6.64064	79.2252	2.17142	89.7166	1.72521	51.6888	14.4636
1383	Pop7	328.381	1.18612	0.0999419	11.8681	1.73305e-32	2.37891e-31	180.963	394.437	157.436	507.316	215.194	381.084	476.343	175.001	460.09	195.645	392.293	246.772	239.415	492.762	189.525	535.125	205.36	391.817	203.841	527.213
1384	0610009O20Rik	192.046	-1.68356	0.141991	-11.8568	1.98451e-32	2.72211e-31	353.749	134.976	318.178	83.1891	239.976	63.703	63.4955	253.061	91.5912	353.423	72.3191	259.684	358.602	125.926	272.858	86.5726	263.228	117.652	255.438	73.2933
1385	Wdr76	56.9126	-2.82656	0.238613	-11.8458	2.26175e-32	3.10015e-31	55.4129	12.1853	78.4627	10.029	135.077	21.469	16.893	77.7238	16.9111	101.39	16.0581	120.074	75.5887	14.6765	93.2149	8.0786	143.784	9.37413	115.261	16.5884
1386	Pafah1b1	699.14	1.29425	0.109283	11.8431	2.33678e-32	3.20068e-31	363.782	1158.25	437.227	1258.44	377.191	907.243	940.378	474.125	926.738	332.786	834.828	419.065	309.542	978.43	400.472	1207.15	419.372	1012.72	512.409	712.644
1387	Hn1	4602.86	1.11963	0.094541	11.8428	2.34492e-32	3.20951e-31	2515.8	5398.91	2855.48	7943.04	2652.58	6726.23	5939.6	2464.14	5945.69	3832.5	5014.45	2908.76	2814.29	6736.82	2809.38	6063.55	3184.35	5655.53	2985.7	7610.46
1388	Actg1	61582	1.3934	0.117662	11.8424	2.3564e-32	3.2229e-31	25808.6	85960.5	30317.2	96492.7	40020	72455.5	101156	25272	90011.4	40148.4	91389	51378.6	26812.6	90635.7	29849.4	84325.8	36866.7	79355.4	33092.7	100291
1389	Tnfaip8l1	34.5252	-3.21778	0.27182	-11.8379	2.48569e-32	3.39729e-31	50.6784	0	53.0521	13.3753	57.5292	3.9825	2.95446	51.8093	4.27095	69.201	19.0423	75.7209	82.9832	5.09002	53.1469	4.17411	61.0007	12.646	64.4161	5.43149
1390	Trove2	231.067	-1.5226	0.128667	-11.8336	2.61627e-32	3.57318e-31	436.608	105.06	357.274	107.089	241.921	128.149	103.702	390.075	92.1076	290.153	166.08	274.336	311.314	121.424	346.714	130.298	391.643	139.993	380.411	106.991
1391	Stam2	1002.59	0.9316	0.0787646	11.8276	2.80911e-32	3.8338e-31	630.82	1347.54	710.142	1495.92	677.52	1287.23	1620.77	671.44	1291.34	727.454	1314.79	807.31	729.698	1277.88	548.38	1254.63	682.68	1104.73	704.52	1167.1
1392	Abhd8	99.829	-2.29701	0.194231	-11.8262	2.85929e-32	3.89947e-31	207.416	56.7141	105.455	32.6796	155.297	30.3632	16.2307	143.891	35.7263	256.25	30.6129	129.642	202.698	26.7022	124.491	38.6495	183.241	43.7957	146.851	29.8736
1393	Coq9	322.798	-1.19875	0.101392	-11.823	2.97062e-32	4.04841e-31	537.788	197.386	425.661	201.246	368.766	172.417	132.584	416.957	200.176	509.41	236.359	433.892	520.283	232.09	451.114	209.2	405.868	184.998	421.992	197.781
1394	Ift140	126.29	-2.33054	0.197214	-11.8173	3.1769e-32	4.32642e-31	223.459	27.7253	168.428	36.6608	164.129	57.3696	59.8443	233.78	22.0728	249.957	32.2335	154.017	311.331	37.5995	160.094	51.9926	206.153	54.6099	242.54	31.8128
1395	B430306N03Rik	224.892	1.93232	0.163548	11.815	3.26644e-32	4.44517e-31	64.4378	272.816	67.3364	261.339	112.321	393.483	476.169	80.293	363.698	154.082	358.415	108.939	58.4452	379.392	80.6025	400.09	127.97	339.919	78.4443	319.639
1396	Psmd4	1522.87	0.901174	0.076298	11.8112	3.41483e-32	4.64378e-31	996.743	2010.42	976.704	1887.92	956.808	1529.01	1951.01	960.061	2025.23	1233.78	2090.4	1175.06	1225.61	2186.53	1041.17	2056.96	1074.61	1861.08	975.182	2243.1
1397	Cdc37	1536.18	0.983755	0.0832998	11.8098	3.47349e-32	4.72017e-31	1077.01	2212.17	955.169	1916.57	907.038	1881.75	1934.21	870.815	2245.84	1246.6	1911.5	1227.37	1167.38	2420.44	901.407	1949.37	1060.87	1941.28	904.283	1992.54
1398	Lrp1	6468.4	-1.31708	0.11162	-11.7996	3.92023e-32	5.32343e-31	9651.78	2572.95	8644.22	4037.6	7911.5	3360.94	3213.85	8333.87	3748.2	11074.6	4191.67	8714.26	7937.72	3098.58	8766.19	3295.89	10691.4	5304.58	10599.7	4218.47
1399	Glrx	5514.17	2.1305	0.180604	11.7966	4.06642e-32	5.51801e-31	1389.21	9962.62	1398.49	9043.02	2855.47	11145.9	7659.04	1269.71	9203.09	2166.13	7558	4302.33	1476.61	10041.7	2014.19	8904	2048.93	7503.3	1574.23	8767.39
1400	Galnt12	45.1869	-3.84337	0.326016	-11.7889	4.45333e-32	6.03872e-31	84.9827	4.19813	110.318	1.60156	46.3584	3.83286	7.95586	90.9079	6.73368	116.051	8.23901	41.594	62.713	0	78.1786	8.04468	115.44	6.29416	95.6561	14.6383
1401	Slc50a1	273.582	-0.904668	0.0767418	-11.7885	4.47617e-32	6.06536e-31	390.182	190.353	372.278	205.64	374.591	195.098	192.023	340.736	189.173	405.819	184.108	331.248	332.819	191.971	377.041	164.599	327.146	200.337	317.365	189.111
1402	Wfdc17	11056	2.3558	0.199852	11.7877	4.51768e-32	6.11723e-31	5900.49	21422.2	4525.63	19201.4	2655.54	12574.2	23762.2	4114.52	20144.7	2614.17	13102.7	1483.94	5164.11	24112.6	3808.64	23065.3	2636.16	11575.6	3240.9	16014.4
1403	Dcaf17	199.729	-1.65129	0.140097	-11.7867	4.5691e-32	6.18246e-31	336.695	96.7443	334.623	80.1468	210.42	89.498	99.1851	280.194	66.8774	283.691	157.132	260.781	334.659	84.7897	352.47	94.5572	306.527	134.485	315.006	76.1005
1404	Mcm2	374.13	-3.31806	0.281538	-11.7854	4.63982e-32	6.27367e-31	386.304	34.7445	420.631	40.1115	813.902	125.606	51.7327	348.487	58.9455	1152.58	75.6087	1228.63	387.194	67.4449	483.463	33.3142	944.608	134.021	641.011	54.2596
1405	Atp6v0d2	553.778	-2.47791	0.210288	-11.7834	4.75327e-32	6.4225e-31	1305.71	169.155	1140.02	152.501	620.106	113.912	176.641	1579.28	206.908	341.71	109.861	874.658	1152.66	161.018	712.157	163.149	630.516	230.588	1040.23	194.774
1406	Rbpj	2697.07	1.46587	0.124484	11.7756	5.21587e-32	7.04254e-31	1222.37	4037.61	1069.33	3894.99	1415.73	3444.79	4241.55	1026.86	4366.14	1396.35	3519.93	2340.52	1183.32	4154.56	1383.4	4045.38	1881.45	4089.98	1410.78	3816.28
1407	Oxct1	1552.32	-1.2031	0.102186	-11.7736	5.34094e-32	7.20628e-31	2650.75	747.682	2203.01	1045.97	1528.67	1033.28	1079.56	2070.89	845.481	2439.18	735.361	1868.59	2488.54	884.431	2167.78	859.767	2084.43	1059.87	2162.8	1090.31
1408	Dlst	1224.06	1.06624	0.0906247	11.7654	5.88209e-32	7.9308e-31	916.625	1848.27	738.809	1565.79	658.2	1557.76	1737.33	591.452	1710.12	921.959	1665.58	937.023	683.179	1624.66	690.139	1473.55	888.36	1620.93	876.66	1774.84
1409	Smad3	139.5	-2.4359	0.20708	-11.7631	6.0485e-32	8.14937e-31	359.828	47.5707	146.909	93.3703	219.322	44.81	46.2128	202.197	53.2369	195.668	30.9547	266.115	202.097	41.0379	335.072	39.2172	239.337	23.2931	179.565	24.1803
1410	Piezo1	3056.04	1.7583	0.149534	11.7585	6.38813e-32	8.60087e-31	1243.52	3513	1178.69	6168.55	1036.8	4370.81	4045.77	1136.08	5208.31	1697.15	4626.81	2052.38	1426.82	4273.19	997.352	3246.56	1700.93	4670.74	1471.88	7055.45
1411	Lyst	589.082	-1.42298	0.12104	-11.7562	6.55847e-32	8.82396e-31	901.226	229.234	983.495	271.89	540.578	264.859	429.316	983.693	391.565	768.875	336.504	732.809	874.675	304.353	909.365	302.011	940.254	321.79	961.772	333.371
1412	Oxld1	36.8799	-3.45758	0.294115	-11.7559	6.58705e-32	8.85612e-31	99.9173	0	70.0481	2.90103	42.4418	8.57917	4.28592	82.8455	7.63123	69.9289	3.93272	52.966	92.1573	4.94373	67.1477	7.2337	47.9566	10.7867	59.232	2.66236
1413	Lpar1	252.693	5.19431	0.441916	11.7541	6.72921e-32	9.04085e-31	2.27894	413.752	35.4193	495.688	12.478	835.183	573.001	18.5079	461.867	5.26129	393.503	40.7649	0	487.849	8.36762	452.764	7.89559	411.557	5.48778	392.234
1414	Rab3gap2	1066.05	-0.91992	0.0782664	-11.7537	6.75908e-32	9.07457e-31	1446.96	666.046	1561.01	648.774	1203.25	633.197	792.937	1367.3	758.155	1325.16	934.899	1483.2	1516.59	703.565	1153.72	798.533	1353.78	735.978	1527.74	710.174
1415	Tpbg	20.1884	4.59343	0.390854	11.7523	6.87213e-32	9.21982e-31	0.878236	21.7627	3.02025	49.1415	1.60255	33.502	42.9688	0.488465	34.9826	2.84281	37.8748	3.43722	0	52.2996	0	55.2996	0.861603	30.1747	0	32.6315
1416	Tmod3	1700.51	1.06106	0.0903859	11.7393	8.01753e-32	1.07489e-30	1148.15	2344.14	1205.25	2656.3	996.611	1954.76	2270.74	1108.34	2312.5	744.767	2163.42	981.163	1118.42	2659.84	1261.97	2391.52	1192.76	2115.69	1268.04	2115.89
1417	Arpc5	9461	0.959566	0.0817973	11.731	8.83883e-32	1.18417e-30	6880.61	13178.6	6809.42	13600.2	6139.61	11678.2	12365.2	6065.27	12660	4401.85	10775.9	7143.52	6765.41	14940.9	6643.73	12399.3	6500.46	12070.4	6912.32	11289.2
1418	Ccng2	254.813	1.97368	0.168249	11.7307	8.87189e-32	1.18776e-30	129.842	415.243	115.012	556.999	61.189	324.35	460.89	155.298	426.251	86.7488	336.75	52.9985	89.7926	402.22	104.23	355.861	135.236	396.389	105.434	385.524
1419	Hmces	102.099	-1.72398	0.146968	-11.7304	8.90882e-32	1.19186e-30	166.922	24.0431	142.306	62.4686	134.029	43.2649	28.2887	138.898	48.2517	185.789	38.9568	197.52	132.62	52.947	149.309	55.3879	166.242	41.0263	153.057	80.6454
1420	Pithd1	114.115	-2.12381	0.181079	-11.7286	9.09597e-32	1.21604e-30	181.622	34.4925	153.819	32.3837	235.186	89.761	34.8233	198.072	32.8266	195.531	73.3913	136.616	197.694	25.4029	167.923	32.3106	200.344	44.2464	168.953	46.8952
1421	Sepw1	407.718	1.45937	0.124447	11.7269	9.28088e-32	1.23989e-30	251.364	485.076	186.374	657.184	232.289	639.435	571.429	174.469	610.963	230.111	558.03	203.748	252.46	564.146	318.278	654.399	182.505	453.289	152.084	776.73
1422	Atp13a2	1332.62	-1.56336	0.133325	-11.7259	9.39339e-32	1.25404e-30	2481.72	479.883	2120.07	748.032	2023.95	504.605	656.548	2080.74	751.561	1701.14	748.323	1424.9	2851.18	804.497	1803.32	532.663	1670.73	602.158	1761.47	904.848
1423	Tmem104	725.824	-2.14811	0.183245	-11.7226	9.76598e-32	1.30286e-30	1824.91	145.72	1254.93	204.645	847.389	335.444	384.684	1074.46	217.415	1318.98	253.868	775.828	1597.34	433.378	1059.94	290.707	1022.73	189.648	1073.19	211.261
1424	Capza1	4831.7	0.706454	0.0602773	11.7201	1.00602e-31	1.34118e-30	3453.57	6272.23	3481.93	6132.28	3513.17	5197.72	6159.53	3274.82	5985.98	3325.72	5790.94	4089.21	3588.97	6745.96	4073.72	5813.03	4110.73	6013.72	3802.68	5808.01
1425	Nfatc2	138.596	-3.11635	0.265914	-11.7194	1.01389e-31	1.35071e-30	253.143	24.8523	205.102	15.632	328.119	58.6738	13.1035	230.192	38.2163	241.054	62.5241	266.849	255.708	6.0836	243.679	19.3131	247.194	14.1755	198.584	49.7172
1426	Xpc	144.783	-1.84239	0.157229	-11.7179	1.03214e-31	1.37406e-30	250.503	57.2622	248.181	35.7706	144.637	51.0395	71.9985	242.092	70.4485	214.39	68.9653	195.58	322.298	64.2468	205.8	74.85	262.69	78.0652	185.486	51.353
1427	Mettl6	450.042	1.00105	0.0854328	11.7173	1.03881e-31	1.38197e-30	300.752	559.776	286.247	594.256	253.466	697.792	566.288	381.329	587.361	254.161	595.94	272.861	326.003	696.185	338.625	580.544	283.718	564.017	310.893	550.626
1428	Psmd14	1624.4	0.970679	0.0828626	11.7143	1.07661e-31	1.43126e-30	887.977	2157.83	1100.02	2024.61	1156.6	1954.21	2165.65	884.561	2110.13	1037.28	2198.99	1373.64	918.912	2191.98	1121.98	2392.74	1250.31	2224.14	1236.71	2099.81
1429	Hspa8	27537.7	1.20125	0.102559	11.7128	1.09632e-31	1.45644e-30	16827.4	49766	13599.7	30851.4	14993.3	36292.9	39370.4	15146.5	42059.7	19960.3	36304.7	20520.2	17412.4	47483.4	16279.3	39752.5	16970.5	29922.8	15209.8	32030.9
1430	Txlnb	50.8062	2.35953	0.201494	11.7102	1.13055e-31	1.50086e-30	10.7208	88.7467	13.4082	55.0839	16.6205	100.397	116.936	19.3268	73.4299	22.2705	96.8506	25.2353	7.52478	76.7329	17.3214	83.6001	13.0385	72.7456	11.8603	94.2739
1431	Rrn3	728.127	0.814755	0.0696168	11.7034	1.22415e-31	1.62398e-30	531.051	1033.29	431.479	901.774	559.987	831.922	854.442	457.029	898.434	527.443	1057.53	607.706	517.632	930.287	541.229	897.167	546.713	962.265	536.549	938.616
1432	Selt	464.97	1.10222	0.0941825	11.703	1.23013e-31	1.63079e-30	267.701	610.597	273.254	685.547	297.91	655.134	576.707	330.764	743.886	220.739	591.784	295.744	250.609	707.527	331.197	641.541	306.629	550.742	386.544	574.839
1433	Cracr2b	83.589	-2.96674	0.253561	-11.7003	1.27011e-31	1.6826e-30	221.628	23.2917	181.497	13.4803	94.4609	28.368	9.29595	160.361	22.7476	148.327	6.28207	88.8264	181.739	11.2925	84.3321	19.3366	161.468	22.9206	148.701	43.4236
1434	Eif2d	317.134	-1.29849	0.110994	-11.6987	1.29349e-31	1.71239e-30	396.574	148.15	411.157	171.136	455.093	231.007	215.591	409.1	196.863	593.966	199.373	525.544	466.382	153.375	444.257	162.365	449.033	208.48	372.01	133.233
1435	Gp49a	5706.9	1.68761	0.144326	11.693	1.38422e-31	1.83122e-30	2421.97	9156.8	2809.28	10237.4	1947.65	4698.72	8798.3	2802.36	9198.55	3028.91	8339.79	1523.75	2459.23	9313.73	3610.85	9541.45	3508.85	8326.73	2930.86	9482.77
1436	Plk1	279.189	-2.59437	0.221928	-11.6902	1.43106e-31	1.89186e-30	253.939	47.9336	374.218	57.934	445.023	123.154	67.904	363.255	41.5368	718.705	61.0348	612.529	397.991	64.8617	450.539	81.4071	654.247	152.715	527.962	86.8823
1437	Nfxl1	383.939	1.91569	0.164094	11.6743	1.72392e-31	2.27744e-30	158.369	607.431	181.964	747.555	220.102	811.589	699.473	167.5	704.85	76.7744	546.197	210.283	106.701	537.891	181.749	488.429	167.637	511.721	135.081	417.489
1438	Spr	262.034	-1.42783	0.122436	-11.6618	1.99705e-31	2.63644e-30	409.733	94.6521	318.818	117.687	363.054	150.479	129.519	301.697	141.288	494.374	179.843	506.213	336.602	178.496	359.487	135.706	390.303	134.118	339.005	159.605
1439	Rnf115	973.693	1.19565	0.102596	11.654	2.18991e-31	2.88903e-30	534.085	1207	688.176	1528.57	582.683	980.055	1333.01	615.014	1306.64	420.019	1254.87	491.604	653.13	1569.41	646.2	1522.68	694.611	1533.93	600.808	1311.37
1440	Tcf12	304.44	-1.80489	0.154984	-11.6457	2.41393e-31	3.18236e-30	589.018	120.313	575.27	126.43	304.717	217.461	133.287	494.885	135.91	286.253	121.122	530.817	510.213	94.8213	419.775	115.925	455.19	155.357	568.617	133.417
1441	Spice1	78.7983	-2.88522	0.247789	-11.6439	2.46512e-31	3.2476e-30	132.38	10.1875	92.7666	8.80633	154.076	45.4545	22.8055	179.272	11.5939	169.411	8.93486	114.987	126.478	12.7687	134.505	23.3821	138.06	16.8866	118.817	54.3924
1442	Wdr1	11207.7	0.910781	0.0782277	11.6427	2.50013e-31	3.29144e-30	7229.28	14509.4	7590.01	15233.3	9300.2	11956.3	15098.3	6481.25	15796.9	7607.31	15011.5	9413.28	7284.3	17203.2	7527.92	14785.1	7934.95	12629.4	7453.65	14109.3
1443	Pik3cg	2487.21	1.09844	0.0943504	11.6421	2.51685e-31	3.31115e-30	1580.68	4047.56	1262.48	3800.07	1482.55	2957.25	3292.63	1510.49	2989.86	1876.47	2824.94	2038.39	1503.7	3539.98	1378.96	2909.23	1646.42	3752.85	1542.68	3806.95
1444	Kifap3	167.474	-1.50177	0.12907	-11.6354	2.7242e-31	3.58146e-30	249.851	52.193	295.693	86.367	201.722	109.651	77.0634	242.604	103.755	224.091	85.9531	192.326	282.933	70.9491	282.356	87.5964	261.132	111.135	266.853	65.2496
1445	Fcf1	649.91	0.972729	0.0836177	11.633	2.79925e-31	3.67757e-30	383.089	792.27	480.263	946.792	508.586	785.138	914.31	386.14	841.555	423.653	703.994	475.436	416.993	884.574	533.225	1016.08	381.511	831.436	410.871	882.289
1446	Xylt2	943.34	1.80857	0.155495	11.631	2.86726e-31	3.76432e-30	310.585	1093.3	350.983	1368.81	563.96	1751.98	817.37	341.782	1922.98	355.461	1623.48	636.436	472.199	1589.25	405.238	1313.38	433.883	1459.82	317.028	1738.86
1447	Ube2n	552.419	0.82326	0.0707955	11.6287	2.94536e-31	3.86418e-30	381.376	772.483	358.562	714.592	412.839	674.839	674.197	323.892	656.78	433.717	592.329	402.147	423.142	804.354	430.234	733.539	425.993	690.251	402.6	740.514
1448	Dut	105.452	-3.61486	0.310933	-11.6258	3.04612e-31	3.99362e-30	81.4527	4.82126	121.221	11.3356	301.543	29.2741	11.2068	97.0783	8.31123	294.339	30.2958	334.761	104.69	19.6267	157.985	12.7346	269.437	19.2245	181.875	17.8239
1449	Tram2	334.016	0.978551	0.0842148	11.6197	3.27265e-31	4.28765e-30	227.417	497.267	260.716	380.176	198.246	395.558	470.756	249.831	505.555	214.777	463.731	194.157	242.796	434.793	230.739	448.817	237.71	458.628	196.702	371.952
1450	Asnsd1	487.209	-0.961859	0.0827877	-11.6184	3.32379e-31	4.35164e-30	711.134	304.645	583.257	310.855	566.044	371.037	278.577	643.995	310.192	633.632	315.406	663.051	760.331	417.067	638.764	368.026	622.544	331.622	633.339	280.655
1451	Numa1	529.833	-1.4499	0.124833	-11.6147	3.46828e-31	4.53769e-30	737.284	254.441	742.674	271.542	653.268	455.071	237.301	684.685	344.827	984.263	249.589	788.071	893.897	244.956	709.359	207.568	785.363	250.589	789.969	311.955
1452	Gyg	2266.47	-1.83287	0.157823	-11.6135	3.51929e-31	4.60125e-30	4706.4	740.68	4280.49	1030.73	2344.61	736.44	1227.43	4495.88	956.686	2684.09	941.205	1980.63	4896.46	986.646	3807.68	1176.3	2729.94	1190.04	3482.76	934.371
1453	Ifnar1	2829.51	0.974176	0.0839218	11.6081	3.74641e-31	4.89483e-30	2212.09	3888.5	1954.99	3812.67	1648.22	3515.36	4188.27	1874.09	3634.22	1822.26	3582.33	1926.93	2134.08	4309.4	1501.37	3258.18	2024.42	2960.48	1982.93	4359.38
1454	Zdhhc9	351.14	-1.27564	0.10993	-11.6042	3.92395e-31	5.12326e-30	495.43	200.152	442.299	175.343	690.992	224.778	211.174	465.297	198.604	548.935	186.999	449.525	413.595	194.286	541.21	166.287	469.376	270.944	457.302	220.264
1455	Ddx60	1335.11	3.84374	0.331334	11.6008	4.08343e-31	5.32783e-30	119.093	2279.03	116.299	2863.04	207.132	3354.7	3223.49	123.799	2309.8	30.8287	1712.55	164.57	287.118	2335.08	492.828	2311.46	79.1412	2046.81	125.846	2519.57
1456	Pcgf5	113.701	2.828	0.243804	11.5995	4.14646e-31	5.40635e-30	41.6009	223.961	15.5834	356.639	30.7983	195.769	256.816	30.7495	216.5	29.9667	114.842	27.2825	5.00944	191.307	18.7364	156.096	44.7161	131.355	33.8347	152.46
1457	Srxn1	1646.84	2.4486	0.211135	11.5973	4.25084e-31	5.53864e-30	342.225	3072.05	452.46	2310.43	378.556	753.058	2399.97	352.519	3966.49	702.114	3412.25	582.12	452.137	2432.75	482.345	3241.05	806.241	3752.88	547.319	2497.87
1458	Gna13	2193.63	1.28788	0.111062	11.5961	4.31338e-31	5.61627e-30	1411.64	3191.56	1599.03	4212.57	1027.33	2787.38	3072.4	1278.48	2881.81	1106.16	2168.12	1218.71	1288.72	3547.99	1275.76	2942.97	1305.22	2405.13	1233.57	3918.14
1459	Atg7	806.478	-1.28324	0.110664	-11.5958	4.32902e-31	5.63277e-30	1295.19	374.807	1096.19	441.321	795.672	363.211	497.374	1133.12	537.249	1268.72	578.394	944.921	1471.22	545.676	1058.43	402.41	1179.17	476.008	1190.89	479.573
1460	Gpn3	147.707	-1.73763	0.149937	-11.5891	4.68169e-31	6.08747e-30	189.918	25.6161	224.958	52.1731	236.518	65.1754	47.4553	227.036	53.9184	215.917	67.7512	246.219	230.784	96.2308	222.372	73.6804	247.47	114.035	244.538	72.3686
1461	Blvrb	5375.13	1.42807	0.123257	11.5861	4.84819e-31	6.29966e-30	3433.59	8378.34	3017.95	8009.06	2182.13	4285.12	7897.43	2872.52	8922.75	3412.64	7867.17	2113.55	3351.12	8605.14	2910.58	9490.74	2911.73	6569.87	2926.19	8344.95
1462	Arg2	85.4667	3.48419	0.300873	11.5803	5.18833e-31	6.73702e-30	23.4012	179.732	15.6664	93.5679	2.75978	69.0716	195.872	18.6811	171.5	9.52897	178.359	8.43682	27.974	201.996	16.966	239.023	8.14064	170.703	12.7058	65.2492
1463	Vcpip1	1165.87	0.997177	0.0861115	11.5801	5.20072e-31	6.7485e-30	868.197	1527.5	885.265	1738.3	708.321	1647.85	1666.63	787.395	1416.58	598.562	1422.57	687.367	834.77	1824.7	918.028	1400.54	710.785	1318.47	791.478	1564.05
1464	Khdrbs1	559.535	0.92573	0.0799531	11.5784	5.30192e-31	6.87512e-30	391.496	661.444	403.488	866.413	462.991	822.763	636.199	345.861	763.294	330.643	664.243	415.634	330.373	790.863	389.903	696.178	401.247	682.179	388.548	746.938
1465	Mtpn	10608.1	1.24841	0.107843	11.5761	5.4455e-31	7.05648e-30	6090.56	16923.2	6859.09	14449.3	5166.74	10321.4	15887.2	6633.94	16589.1	4654.2	15878.4	5446.02	5676.34	15979.2	7168.89	15769.2	7777.78	15783.6	7373.91	11734
1466	Man2a1	569.85	1.88297	0.162685	11.5743	5.55978e-31	7.19965e-30	216.875	1376.67	220.514	864.842	160.363	504.06	1058.76	226.208	1152.1	326.679	555.038	243.705	214.088	825.001	247.812	1019.11	285.054	664.788	287.331	947.993
1467	Haus8	516.611	-1.54978	0.133942	-11.5705	5.81169e-31	7.52074e-30	660.29	346.888	635.515	195.672	684.076	243.554	229.344	718.668	209.798	1131.61	415.335	775.222	753.732	307.709	685.962	223.183	867.875	290.376	743.069	214.337
1468	Bst2	6148.86	2.19366	0.18966	11.5663	6.10833e-31	7.89922e-30	2176.26	9489.07	1630.23	11177.5	2434.89	9489.28	10227.1	1529.01	11350.1	1558.94	8040.36	2298.23	2072.27	11641.5	5245.37	11241.5	1462.1	6910.27	1660.26	11342.8
1469	Gm5431	871.487	3.00356	0.259755	11.563	6.34399e-31	8.19839e-30	189.436	1429.38	134.233	1897.63	157.1	1595.37	1936.4	175.858	1375.03	77.3072	1072.37	108.475	198.092	1756.13	630.595	1276.62	116.957	1410.89	151.959	1739.92
1470	Ms4a6b	1658.13	2.6869	0.232518	11.5557	6.9095e-31	8.92312e-30	478.533	4271.49	377.173	3295.4	376.173	3663.2	2518.6	308.327	2516.28	219.182	1775.99	318.154	735.551	3516.02	1026.02	2707.93	251.806	1847.88	375.266	2583.6
1471	Mcm7	364.789	-3.16722	0.274227	-11.5496	7.4142e-31	9.5684e-30	362.94	30.935	395.344	49.6721	723.197	142.359	82.8674	441.598	36.7155	1154.27	78.5068	1070.22	385.58	60.2941	406.087	38.8098	927.566	111.576	709.514	87.7379
1472	Slc1a5	226.517	-1.64838	0.142753	-11.5471	7.63891e-31	9.85171e-30	309.075	77.643	300.149	80.5897	303.347	99.7638	114.068	320.572	105.526	461.53	179.982	349.106	357.165	113.571	243.548	76.2825	431.534	126.379	340.002	140.51
1473	Tfdp2	121.544	-2.74145	0.237619	-11.5372	8.57128e-31	1.10466e-29	190.358	16.9465	237.04	19.7754	158.731	49.7836	26.2441	252.61	22.6034	195.914	98.7899	179.505	229.172	13.2801	164.277	46.381	258.188	51.5564	202.583	17.1378
1474	Snd1	1597.4	0.912008	0.0791007	11.5297	9.346e-31	1.20369e-29	1105.24	1673.5	1003.35	2504.9	1170.96	2041.07	2234.5	882.635	2226.36	1187.64	1907.46	1188.03	1080.07	2255.3	1097.71	1835.52	1095.52	2021.69	1292.84	2143.77
1475	Cnnm2	26.4463	-4.32421	0.375169	-11.526	9.75476e-31	1.25549e-29	45.5693	0	51.6519	3.11694	64.4859	7.89137	0	52.0821	1.08419	42.5325	2.63074	36.4446	59.29	1.50545	59.2555	0	40.7628	3.44814	47.5427	9.63101
1476	Vmp1	2266.55	0.830507	0.0720726	11.5232	1.00804e-30	1.29652e-29	1770.49	3249.14	1715.02	2999.25	1446.79	2780.28	3402.48	1714.1	2962.84	1449.91	2741.44	1674.39	1741.49	2996.3	1530.1	2816	1801.64	2811.28	1470.86	2257.15
1477	Hyal1	129.844	-2.37747	0.206338	-11.5222	1.01951e-30	1.31038e-29	263.377	45.5624	271.264	49.1324	162.801	53.083	51.4797	179.431	48.245	134.557	25.714	371.339	231.507	33.561	167.33	19.9098	173.292	39.4781	222.399	53.427
1478	Prps2	386.579	-1.46858	0.127569	-11.5121	1.14709e-30	1.47336e-29	750.551	177.527	517.68	190.338	447.998	230.282	195.125	546.129	169.438	507.68	147.96	552.718	617.314	146.386	519.709	270.38	600.761	281.299	623.62	238.682
1479	Ppp2r1a	5096.87	0.824724	0.0716482	11.5107	1.16466e-30	1.49492e-29	3853.41	6453.09	3540.18	7298.8	3237.58	5683.39	6550.19	3158.52	6689.2	4241.23	5989.94	4122.77	3822.06	6811.99	3296.12	6149.67	3794.63	5878.74	3716.36	7649.6
1480	Mast3	300.198	-1.6399	0.142526	-11.506	1.23118e-30	1.57923e-29	596.207	186.361	477.282	167.882	498.786	147.824	112.424	447.535	166.259	530.447	180.445	283.628	449.026	171.856	445.567	94.5884	412.843	108.662	390.762	135.583
1481	Arih2	970.871	1.13301	0.0984964	11.503	1.2735e-30	1.63242e-29	803.81	1346.29	596.476	1386.83	450.581	1080.59	1378.9	653.176	1481.85	501.259	1496.77	581.146	679.637	1406.38	523.014	1388.54	645.408	1098.23	644.996	1273.52
1482	Dclre1a	100.292	-1.8889	0.164264	-11.4992	1.33189e-30	1.70612e-29	155.489	24.1599	121.655	35.0404	199.735	50.596	40.5548	112.17	42.4216	144.15	66.7886	180.538	113.07	28.4738	185.18	45.8016	181.079	46.5752	183.751	48.6151
1483	Mfsd7b	184.452	-2.15295	0.187259	-11.4971	1.36364e-30	1.74561e-29	335.833	37.3345	380.372	57.3321	187.072	83.775	63.3405	363.297	95.9653	176.286	77.4871	215.188	371.798	51.8197	331.206	70.4355	303.399	87.6623	358.2	41.2365
1484	Rnmt	546.668	0.974897	0.0848206	11.4936	1.42022e-30	1.81681e-29	444.495	647.384	359.62	611.316	296.875	601.971	826.644	359.984	742.139	355.081	721.857	391.177	417.289	813.706	358.375	809.802	345.067	772.962	372.881	684.736
1485	Map3k1	727.471	-1.91112	0.166335	-11.4895	1.48891e-30	1.9023e-29	1430.44	404.546	1418.12	239.802	896.009	304.371	459.679	1273.28	341.946	641.211	226.61	944.979	1286.75	307.676	1187.64	310.977	1102.47	320.061	1308.62	144.234
1486	Tmem9	142.142	-1.49288	0.129933	-11.4895	1.48905e-30	1.9023e-29	220.565	64.1536	219.742	56.0069	192.112	105.906	83.8309	188.881	56.885	204.587	76.7278	216.424	275.945	73.254	194.069	65.6762	174.321	89.8008	211.136	72.8187
1487	Fosl2	268.374	1.95057	0.169944	11.4777	1.70761e-30	2.18004e-29	76.449	359.483	63.8788	430.853	150.048	321.755	443.888	117.65	653.275	129.237	506.612	146.178	98.5381	497.8	103.526	447.774	124.739	274.479	90.5532	330.77
1488	Irf2bp2	416.315	-1.88804	0.164526	-11.4756	1.74897e-30	2.23135e-29	721.642	234.071	759.914	144.11	634.391	69.8505	260.334	710.322	224.402	495.589	139.151	675.462	680.518	202.402	692.496	205.832	649.335	167.856	539.312	119.317
1489	Arpc2	9936.72	0.714084	0.0622275	11.4754	1.75394e-30	2.23618e-29	6557.88	12347	7590.52	13122.9	9000.93	11739.4	12043.9	6442.73	12390.9	7633.62	11149.5	7430.5	7061.5	13609.6	7974.13	12811.3	8080.14	11578.8	7499.2	12670
1490	Wbscr27	80.5448	-2.29454	0.200088	-11.4676	1.91816e-30	2.44392e-29	186.222	17.6864	118.11	40.639	93.5153	13.6836	29.8018	172.495	28.4221	111.74	24.9358	83.2364	148.192	25.1092	128.041	32.6319	137.841	30.8407	165.811	21.9431
1491	Snx33	121.498	-2.30132	0.200707	-11.4661	1.95304e-30	2.48669e-29	213.231	39.0281	235.627	38.6272	148.341	6.70882	28.0998	248.708	43.8008	199.249	52.7104	155.196	244.268	54.7338	157.805	44.7148	223.153	54.3458	192.799	48.8163
1492	Ralgapa2	1219.81	1.89151	0.164984	11.4648	1.98184e-30	2.52167e-29	354.224	1335.46	490.157	2004.01	463.85	1456.74	1953.16	455.196	2216.14	867.011	2591.29	541.348	369.487	1787.88	367.99	2327.37	809.99	1850.71	456.604	1697.64
1493	Ttc39c	119.242	3.72772	0.325168	11.464	2.00114e-30	2.54452e-29	16.1099	216.451	1.60139	178.526	16.949	187.87	324.617	15.8392	288.077	24.6991	198.812	29.3775	0	180.343	19.2736	201.182	30.6736	193.382	5.98408	255.078
1494	Adcy9	43.7612	-2.27589	0.198569	-11.4615	2.05967e-30	2.61719e-29	78.5567	17.4438	64.9557	17.9267	57.1904	10.7905	13.3837	84.2339	19.489	87.3658	18.9349	55.9838	91.6467	10.2393	62.9913	13.2024	71.3564	13.6625	72.2357	13.6356
1495	Xrcc1	273.683	-1.57705	0.137626	-11.4589	2.1209e-30	2.69319e-29	418.769	74.0946	363.37	127.751	316.198	82.0568	123.989	362.347	178.58	495.974	194.658	453.281	459.17	152.61	398.646	140.919	430.984	171.214	415.018	114.038
1496	Fam96b	367.588	1.16379	0.101568	11.4583	2.13752e-30	2.71248e-29	251.316	473.032	186.153	533.103	244.567	494.264	480.266	174.862	592.688	244.397	363.638	249.358	255.998	575.092	246.53	616.232	222.095	438.934	209.977	499.261
1497	Nab1	405.678	1.40549	0.122691	11.4555	2.20619e-30	2.79774e-29	203.916	559.673	255.249	551.43	155.61	478.27	536.761	212.839	793.034	162.224	696.671	242.349	228.709	531.033	252.704	664.925	241.3	623.745	273.367	449.743
1498	Tarm1	34.5797	8.58889	0.750038	11.4513	2.3172e-30	2.93656e-29	0	0	0	56.0984	0	36.4216	135.471	0.988944	75.2928	0	91.6116	0	0	149.935	0	57.8375	0	52.6941	0	35.2425
1499	Deptor	182.025	-2.75948	0.240994	-11.4504	2.3402e-30	2.96373e-29	396.691	64.0796	354.813	50.3342	151.296	77.8372	30.2281	394.548	30.7075	321.823	87.0823	172.528	458.822	26.5634	404.101	31.8135	239.654	53.0585	263.381	31.144
1500	Erap1	1088.98	1.08408	0.0946808	11.4498	2.35627e-30	2.9801e-29	620.064	1659.56	610.463	1409.92	555.835	1493.87	1705.72	642.963	1385.01	676.625	1431.48	755.46	660.179	1555.67	978.929	1505.9	775.852	1495.89	707.726	1152.4
1501	Zhx3	136.541	-1.52621	0.133295	-11.4499	2.35505e-30	2.9801e-29	196.6	90.2011	173.308	78.7391	180.17	95.9185	61.3561	210.507	67.3543	188.604	66.0366	269.006	180.418	66.1393	167.121	64.226	260.626	68.016	196.33	50.1398
1502	5031439G07Rik	883.491	-1.54343	0.13485	-11.4455	2.47549e-30	3.12881e-29	1339.07	388.197	1356.56	361.421	622.404	360.405	456.579	1240.57	488.69	1662.9	521.848	1311.12	1558.03	481.262	1333.55	399.712	1409.86	541.676	1323.1	512.867
1503	Galt	121.923	-1.46207	0.127867	-11.4343	2.81741e-30	3.55859e-29	199.924	53.9469	195.475	58.0292	164.268	53.6683	72.57	155.14	53.0396	189.577	47.5895	196.547	206.525	78.7402	173.911	80.9904	163.041	57.8345	141.993	95.6464
1504	Rora	174.377	-2.41471	0.211316	-11.427	3.0644e-30	3.86799e-29	374.745	89.4913	361.706	47.07	149.581	60.2682	33.4653	380.283	64.969	264.912	37.7832	133.72	348.537	56.1195	286.365	75.663	298.417	53.9244	336.975	33.5382
1505	Syvn1	702.416	1.1182	0.0978973	11.4222	3.23941e-30	4.08618e-29	508.404	823.891	376.76	972.622	358.35	1091.26	1009.65	392.499	1033.8	511.312	718.319	517.605	474.381	1097	416.316	847.84	394.957	911.389	494.361	1097.6
1506	Uhrf1	505.116	-2.99091	0.262039	-11.414	3.5606e-30	4.48834e-29	389.145	192.302	569.515	101.724	1133.38	107.351	78.5941	472.198	105.438	1544.12	170.517	1528.21	391.929	92.1801	622.396	78.8559	1425.28	140.017	878.447	80.7188
1507	Nsmce1	321.924	-0.949321	0.0831996	-11.4102	3.71996e-30	4.68611e-29	416.813	171.721	392.257	205.356	465.026	236.384	222.717	362.16	193.474	486.62	210.892	474.592	420.562	229.758	408.775	218.155	422.083	252.398	399.536	249.194
1508	Pnpla7	1438.1	-1.97175	0.172898	-11.4041	3.98843e-30	5.02098e-29	3406.01	870.101	2814.25	492.855	1516.76	722.166	757.051	3002.16	567.873	1700.41	421.579	1414.83	3105.64	489.957	2081.26	457.083	1702.59	539.205	2157.35	542.898
1509	Pdcd4	76.0531	-3.10844	0.272581	-11.4037	4.00711e-30	5.04115e-29	188.681	21.7743	169.96	14.8572	103.01	30.5244	11.8145	181.978	12.421	71.0763	34.2657	70.3516	160.815	8.90502	170.262	8.34581	103.071	10.6974	131.962	16.2898
1510	Cd164	1496.92	1.52012	0.133321	11.402	4.0868e-30	5.138e-29	821.248	2198.44	869.439	2465.77	566.204	1598.62	3093.12	768.971	2452.61	717.801	1812.25	504.695	835.776	2843.51	935.194	2063.1	830.364	1746.58	900.185	1914.6
1511	Shisa5	4901.02	1.14638	0.100556	11.4004	4.16041e-30	5.22708e-29	3114.38	7069.58	2656.42	7003.61	2733.28	6191.21	6434.81	2704.95	7189.52	2790.13	6153.99	3035.34	3297.91	7968.07	4691.39	6449.37	2743.94	5535.57	2743.21	7513.65
1512	Elmo1	1495.33	-1.0758	0.0943761	-11.3991	4.22485e-30	5.30453e-29	1867.02	1034.35	1925.43	840.317	1912.55	1111.96	686.203	1889.57	871.422	2117.12	993.951	2343.43	1751.72	1004.09	1808.21	927.59	2551.46	1136.22	2101.26	1032.8
1513	Max	378.429	1.29723	0.113827	11.3964	4.35624e-30	5.46589e-29	281.531	594.643	219.917	658.363	210.988	500.226	464.108	211.566	566.799	221.462	402.018	254.151	233.54	640.939	223.993	554.063	187.915	430.981	144.457	566.921
1514	Antxr2	581.124	-1.56581	0.137398	-11.3962	4.36907e-30	5.47837e-29	998.609	285.98	838.257	268.909	805.52	457.18	331.381	850.145	232.126	613.394	278.024	1284.14	950.61	257.156	730.882	219.284	779.725	292.968	830.944	317.247
1515	Rhov	85.9759	-2.52856	0.221925	-11.3938	4.49143e-30	5.62807e-29	152.174	4.37109	119.311	28.2217	127.599	39.3989	45.7063	130.42	33.8043	140.69	15.3875	235.164	168.104	22.8796	143.983	16.7375	118.795	24.3532	146.982	5.43395
1516	4930579G24Rik	80.8944	-3.56351	0.312929	-11.3876	4.82068e-30	6.03666e-29	95.8594	13.0885	125.34	7.42718	144.795	10.5598	1.47549	101.805	8.9317	162.298	38.2711	194.599	124.93	2.54305	131.746	12.5354	213.277	31.1443	189.115	8.14744
1517	Tbc1d13	902.39	1.34575	0.11829	11.3767	5.46529e-30	6.83935e-29	504.317	1572.54	550.611	1867.65	387.642	1471.96	1163.22	577.175	1326.61	564.683	1036.53	471.08	584.89	1039.93	515.445	929.754	499.243	1377.92	439.055	1167.53
1518	Ece2	644.838	1.24082	0.10907	11.3764	5.4829e-30	6.85688e-29	356.995	845.925	366.62	975.312	298.875	713.576	1027.61	333.449	980.578	509.167	816.747	375.066	418.572	1032.63	376.923	1142.22	457.486	788.256	352.1	728.648
1519	Kifc1	88.5328	-2.88923	0.254066	-11.372	5.76515e-30	7.20511e-29	89.8758	4.76125	125.735	23.8425	192.102	42.4886	23.5353	123.226	14.051	181.079	6.63964	212.32	103.176	25.7966	105.809	14.7166	234.749	19.482	195.732	31.5394
1520	Fam65a	226.636	-1.45128	0.127623	-11.3716	5.78863e-30	7.2297e-29	370.98	156.186	311.558	111.424	293.88	83.0824	84.2842	308.709	161.66	391.099	120.634	273.986	388.686	133.642	283.161	99.864	365.417	130.071	328.78	135.616
1521	Asb13	304.582	1.47323	0.129554	11.3715	5.79817e-30	7.23684e-29	158.579	433.705	161.206	632.164	167.166	418.63	409.757	136.558	372.435	172.027	307.549	120.357	175.108	479.21	179.11	376.239	149.099	406.623	201.941	634.174
1522	Stat6	2249.11	-0.911887	0.0802874	-11.3578	6.78451e-30	8.46237e-29	3159.45	1700.19	2762.07	1228.21	2413.49	1357.94	1470.88	2816.17	1526.6	3234.46	1739.71	2992.35	3331.43	1809.63	2904.68	1727.26	2934.49	1375.77	2800.9	1696.5
1523	Gtpbp4	478.123	1.46316	0.128974	11.3447	7.88226e-30	9.82513e-29	231.512	892.422	225.979	617.979	244.964	565.635	658.627	210.036	734.242	340.107	585.884	379.495	196.548	774.661	205.227	765.492	282.138	814.746	220.587	616.181
1524	Ddah2	84.5946	-2.09135	0.184362	-11.3437	7.96835e-30	9.92593e-29	126.887	9.32163	139.62	27.3962	90.5355	32.7919	26.5194	133.315	41.1245	170.401	30.2168	128.842	202.017	45.294	117.736	19.3562	123.9	31.2703	145.734	49.6137
1525	Ldlrad3	256.841	-2.27953	0.201046	-11.3384	8.47194e-30	1.05463e-28	725.267	139.722	409.163	94.2704	248.712	87.3819	85.0712	622.21	84.1775	317.652	63.1471	290.048	606.754	89.7923	414.696	59.7045	322.648	78.5293	291.585	106.296
1526	Susd2	29.0513	5.78258	0.5101	11.3362	8.6851e-30	1.08046e-28	0.819469	70.6136	1.69205	11.1234	2.24053	22.5949	60.8595	0	76.2066	0.885254	92.67	0	3.58724	66.0376	0	52.341	2.01087	69.0942	0	48.2493
1527	Zfp398	101.046	-1.65588	0.146086	-11.3349	8.80999e-30	1.09528e-28	180.45	37.8873	168.155	34.3816	121.403	53.692	49.856	157.252	54.5569	149.035	57.6236	138.065	157.746	64.1845	125.782	53.2308	161.248	53.07	184.079	19.2249
1528	C920009B18Rik	513.014	1.14562	0.101092	11.3324	9.06679e-30	1.12647e-28	370.819	947.157	344.179	673.323	337.142	722.078	802.38	334.109	659.269	295.817	625.077	342.631	213.444	597.54	301.858	736.223	313.899	757.442	329.447	556.456
1529	Acp2	1885.43	1.22629	0.108226	11.3309	9.22804e-30	1.14575e-28	1703.94	2844.57	1118.3	2769.33	906.583	2914.57	3053.92	954.157	2456.8	1096.43	2219.39	1264.85	1170.75	3062.18	1053.05	2378.82	1087.96	2140.68	936.426	2575.8
1530	Emr1	38819.8	1.54414	0.136385	11.3219	1.02224e-29	1.26838e-28	20393.8	68768.3	17386.4	52667.1	26498.4	69218.1	59330.3	16801	55604.7	14195.8	52109.5	32988.9	20277.5	68538.5	17527.7	52878.4	14812	45996.9	17356.4	53046.4
1531	Abcg3	44.5416	-3.70935	0.327656	-11.3209	1.03417e-29	1.28235e-28	85.2642	4.87265	123.493	5.76342	102.793	18.7635	5.73281	120.246	4.01648	43.125	0	54.5507	65.6867	9.87268	77.205	4.0409	59.0598	4.08269	99.2227	3.04004
1532	Il4ra	407.806	1.92358	0.170188	11.3027	1.27284e-29	1.57726e-28	237.069	957.839	161.504	503.645	181.576	389.682	599.092	185.344	650.314	142.526	883.507	127.358	257.13	843.997	120.426	483.348	151.804	545.258	132.714	601.992
1533	Pik3c3	323.018	-1.06064	0.0939262	-11.2923	1.43285e-29	1.77438e-28	477.162	245.422	396.626	203.249	356.726	179.848	214.864	497.953	197.621	420.541	222.625	382.733	466.954	203.102	451.062	188.229	454.823	269.705	457.904	173.214
1534	Snx6	1128.12	0.734081	0.0650179	11.2904	1.46294e-29	1.81046e-28	888.618	1348.46	770.719	1405.21	811.238	1406.12	1524.03	796.027	1405.49	853.433	1229.36	1017.28	939.399	1593.15	794.216	1358.26	822.571	1347.16	785.077	1466.62
1535	Irf9	912.307	1.48368	0.131486	11.2839	1.57562e-29	1.94863e-28	437.231	1365.24	410.359	1279.47	381.716	1130.2	1467.32	467.567	1330.45	343.366	1323.38	473.851	494.416	1524.64	905.861	1356.4	424.821	1291.62	474.945	1363.3
1536	Tbc1d31	136.609	-2.61606	0.231937	-11.2792	1.66275e-29	2.05505e-28	174.616	33.4482	208.37	82.4983	262.558	21.5832	54.9342	204.732	21.6734	263.848	23.2023	319.096	163.744	42.1398	198.581	25.2372	307.795	63.4407	241.227	19.4556
1537	Vps26b	367.716	-1.30712	0.115974	-11.2708	1.82847e-29	2.2584e-28	625.686	225.763	558.03	144.105	362.995	204.631	196.61	464.342	248.553	634.26	203.959	447.108	603.261	208.71	534	207.12	548.43	236.926	463.817	236.011
1538	Zfp810	50.9098	-3.34046	0.296678	-11.2595	2.07818e-29	2.56517e-28	97.2349	0	95.8455	2.9721	60.8772	8.01448	1.47838	112.647	4.65533	72.8412	22.7044	64.4437	120.14	17.8202	109.761	17.7067	82.9616	12.6304	110.747	2.71395
1539	Camk2g	208.812	-2.04832	0.181926	-11.2591	2.08806e-29	2.57568e-28	323.761	21.9366	334.319	56.3568	222.415	74.778	97.531	319.897	81.0135	473.59	63.7675	307.347	291.46	146.958	316.038	97.1895	398.247	88.3526	399.001	62.2859
1540	Prdm1	438.003	2.44609	0.217498	11.2465	2.40899e-29	2.96963e-28	268.439	723.415	190.386	1001.68	115.474	714.132	628.863	110.987	747.387	51.4295	936.667	60.3817	172.643	708.78	164.235	752.299	128.175	640.63	102.108	541.947
1541	Mdfic	793.266	1.14832	0.102131	11.2435	2.49296e-29	3.07115e-28	479.11	977.726	525.346	1348.57	552.236	1120.79	1302.48	492.556	1100.61	339.023	835.939	551.797	451.51	1168.69	612.953	1084.31	502.845	970.6	432.182	1016.04
1542	Ednrb	259.969	2.98028	0.265139	11.2404	2.58082e-29	3.17732e-28	46.5529	709.704	70.0254	402.104	95.1903	180.736	625.105	39.8101	467.895	24.6685	370.625	82.0109	92.9783	408.813	18.9907	471.252	34.6176	662.665	78.4908	317.146
1543	Aldh4a1	175.777	-1.72408	0.153426	-11.2372	2.67697e-29	3.29356e-28	363.432	56.2282	249.668	56.2228	227.225	55.8956	67.7144	309.947	110.071	242.942	112.944	263.933	319.439	72.2392	235.339	93.6635	215.072	111.227	282.093	70.2492
1544	Zfp558	44.8139	2.77836	0.247258	11.2367	2.69299e-29	3.31112e-28	8.17459	97.2362	13.0539	69.9072	9.8687	56.4939	127.491	17.4963	71.6992	8.04307	77.6429	8.49922	12.473	114.646	17.8255	78.6457	9.92039	33.6328	11.5333	51.9942
1545	Lsm11	112.439	2.03752	0.181366	11.2343	2.76621e-29	3.39895e-28	50.6251	166.199	38.6628	150.34	60.3135	87.3998	147.389	47.3881	224.012	50.5547	147.297	42.4411	28.0109	262.035	48.7569	177.825	42.8545	190.495	29.7701	256.403
1546	Sigmar1	454.133	-0.961138	0.0855814	-11.2307	2.88222e-29	3.5392e-28	588.916	325.775	554.639	266.228	652.234	263.785	376.226	555.399	300.812	681.789	275.003	569.104	620.444	368.53	631.272	322.488	649.057	277.15	498.647	305.162
1547	Tm2d1	712.377	0.825895	0.0735558	11.2281	2.96666e-29	3.64053e-28	523.474	914.071	500.369	914.856	533.654	922.706	931.873	456.49	915.999	394.569	906.559	547.792	478.717	895.992	568.055	1023.91	542.731	909.341	598.589	767.801
1548	Rfwd3	609.139	-1.03385	0.0921158	-11.2234	3.12994e-29	3.83842e-28	739.627	399.002	685.187	344.673	676.924	394.35	406.689	807.053	344.992	963.292	425.585	985.265	790.305	404.767	750.529	401.43	987.166	452.26	787.045	436.647
1549	N4bp1	344.822	1.85626	0.165486	11.217	3.36365e-29	4.12237e-28	199.464	545.737	120.526	632.907	73.0856	636.728	528.221	157.032	653.281	177.352	360.286	156.689	229.066	561.455	170.942	508.043	98.9299	460.704	118.984	507.004
1550	Pla2g4a	1575.07	1.96017	0.174774	11.2155	3.42386e-29	4.19345e-28	381.163	2807.97	389.026	1893.32	543.444	1442.83	3491.04	586.258	2623.5	861.224	2754.12	806.711	649.12	2850.51	570.346	2887.84	986.025	2549.48	663.772	1763.64
1551	Kifc3	41.33	-5.58124	0.497985	-11.2077	3.73964e-29	4.57726e-28	103.214	0	69.4405	0	30.6811	5.86607	1.62591	77.9125	4.29072	136.7	0	77.6574	80.7439	0	53.3401	0	86.8057	0	98.3219	0
1552	Fam132a	169.238	-1.15044	0.102655	-11.2069	3.77361e-29	4.61587e-28	256.839	80.9706	230.155	102.699	201.911	83.749	139.545	232.441	99.3726	247.223	129.284	244.361	233.103	100.706	222.131	106.829	207.136	85.0554	237.086	144.169
1553	Slc29a1	775.777	-1.24614	0.111251	-11.2012	4.02383e-29	4.91876e-28	1439.94	504.251	1067.29	368.115	898.171	477.295	404.346	989.694	457.381	1160.07	354.719	981.178	1455.6	517.939	862.113	453.335	1021.19	502.164	1040.82	559.908
1554	Def8	212.649	-1.61813	0.144469	-11.2005	4.0529e-29	4.95111e-28	336.247	52.1087	276.213	83.1412	254.178	106.087	152.65	336.296	84.6187	329.678	112.482	355.758	285.646	92.609	326.422	102.276	373.181	163.728	348.164	81.502
1555	Rnf135	478.391	1.1912	0.10644	11.1913	4.49936e-29	5.49298e-28	310.71	517.675	287.774	726.888	260.775	670.995	661.199	252.235	580.74	325.908	564.672	250.458	263.571	705.907	316.698	653.223	249.198	661.755	410.604	896.844
1556	Lonrf3	208.096	-1.75075	0.156479	-11.1884	4.64689e-29	5.66945e-28	314.384	70.9586	250.713	111.162	235.135	94.7353	47.6368	311.484	127.919	301.138	93.0048	416.39	280.282	93.0307	356.176	77.1821	398.212	117.606	349.975	114.798
1557	Mrpl54	494.573	1.03025	0.0921207	11.1837	4.90075e-29	5.97533e-28	352.138	663.237	312.437	728.052	375.119	646.503	631.454	245.795	678.436	352.685	643.069	383.295	307.064	698.755	349.365	732.394	252.25	547.469	322.776	669.176
1558	Rnf150	88.7803	-3.39467	0.303842	-11.1725	5.56057e-29	6.77547e-28	168.887	12.9817	198.868	8.91434	121.837	56.6809	16.2814	172.442	12.3956	127.255	11.2312	178.511	144.675	12.7334	140.773	8.30575	150.159	2.90842	218.921	10.8426
1559	Hsd17b12	3228.66	0.985568	0.0882164	11.1722	5.58057e-29	6.79548e-28	1806.75	4510.43	1837.29	4101.67	2334.29	3765.58	4790.21	1718.99	4266.06	2232.39	4384.33	2917.4	2005.09	4752.52	2203.05	4327	2332.71	4193.19	2271.8	3822.41
1560	R3hcc1	81.1941	-1.81434	0.162408	-11.1715	5.62123e-29	6.8406e-28	109.087	39.9532	115.724	25.8005	127.796	38.5002	27.4031	117.259	25.6574	164.065	42.1801	107.11	110.064	47.5118	102.582	44.711	144.217	35.3366	162.489	36.4339
1561	Eif4ebp2	253.302	-1.86447	0.167009	-11.1639	6.12437e-29	7.44811e-28	516.896	78.3474	370.157	116.121	336.601	78.588	65.7955	412.949	160.719	438.531	112.625	241.486	497.061	133.381	308.627	93.6805	449.831	135.104	416.3	103.247
1562	Asf1b	366.453	-2.62494	0.235231	-11.159	6.47254e-29	7.8665e-28	294.89	64.7315	562.669	73.3729	659.899	136.315	68.4786	444.539	75.5776	904.916	106.217	865.979	388.908	69.0748	516.196	73.3395	907.455	194.338	760.201	161.969
1563	Rab5a	556.264	1.36525	0.122399	11.1541	6.83681e-29	8.3039e-28	289.078	744.623	356.745	953.701	273.698	667.36	800.306	316.114	919.435	170.568	761.475	325.889	273.084	853.484	306.682	748.966	395.902	877.089	404.287	686.802
1564	Sox7	91.3992	-2.96038	0.265473	-11.1513	7.0533e-29	8.56137e-28	179.548	39.0926	91.5986	7.42804	86.8649	6.67882	11.824	125.276	23.2689	234.513	41.5993	130.194	173.778	13.9977	201.357	23.9469	212.292	30.108	172.915	21.7045
1565	Sh3pxd2a	46.4102	-2.45622	0.220369	-11.1459	7.49525e-29	9.092e-28	80.0578	4.32668	59.0579	14.8573	96.919	25.6507	10.3614	73.825	13.5571	86.7122	11.2272	68.9244	49.9358	14.0071	73.3889	19.7241	110.581	11.6329	92.6146	10.8422
1566	Nrros	1912.85	-1.19232	0.106998	-11.1435	7.70654e-29	9.34234e-28	2943.34	1379.67	2596.76	1152.79	2624.08	1247.94	1016.51	2341.57	1263.42	2783.78	1006.65	2914.19	3154.85	1424.94	2237.8	878.705	2548.82	821.529	2452.92	1466.69
1567	Eepd1	112.113	-2.73932	0.245853	-11.1421	7.82474e-29	9.47957e-28	196.654	45.3941	222.971	38.8458	157.9	31.572	34.589	230.888	15.8288	142.814	25.2066	272.892	216.864	65.6994	132.803	14.8328	141.427	13.8314	223.223	18.0248
1568	Sav1	39.3092	2.88378	0.258832	11.1415	7.877e-29	9.5368e-28	17.4815	69.6453	5.42452	106.978	9.40283	35.8844	59.087	13.1872	84.2209	10.4205	60.8351	7.46728	10.2137	63.616	7.24348	73.0011	12.457	69.0331	0	70.5841
1569	2610301B20Rik	55.7228	-2.66059	0.238868	-11.1383	8.16272e-29	9.87642e-28	97.5926	43.1432	65.3965	5.34893	87.9053	17.2429	6.5018	90.5285	10.7963	98.0835	34.4083	102.97	105.286	8.84096	89.2403	13.6085	90.6419	19.9988	98.2016	28.7195
1570	Traf3ip3	161.973	-3.25364	0.292229	-11.1339	8.58214e-29	1.03773e-27	214.403	15.2084	282.791	14.4354	249.55	74.1698	83.7406	309.838	26.1878	383.759	11.5834	264.878	330.783	10.3424	263.124	27.4399	319.523	15.6386	299.003	43.0511
1571	Pphln1	684.087	1.09678	0.0986423	11.1188	1.01685e-28	1.22876e-27	415.031	828.218	392.376	1049.98	352.879	731.661	1051.62	367.337	916.659	553.192	908.655	517.873	461.53	854.682	354.997	929.661	480.662	1009.81	467.015	1037.91
1572	Ceacam1	176.016	-1.26596	0.113908	-11.1138	1.07469e-28	1.29783e-27	253.657	76.5977	282.817	81.9604	217.606	124.386	92.8412	265.345	127.682	226.056	97.2817	217.628	277.669	100.889	214.009	95.6247	300.888	117.397	251.698	98.2923
1573	Tcp11l2	205.902	-3.29905	0.296861	-11.1131	1.08292e-28	1.30694e-27	579.353	25.3752	483.666	16.0962	183.22	62.56	47.5275	514.019	22.9586	203.553	105.69	171.959	635.126	34.799	388.239	37.9763	210.003	31.499	342.529	21.899
1574	Elovl5	429.168	-1.26387	0.113733	-11.1126	1.08993e-28	1.31457e-27	596.748	362.68	609.771	239.243	581.205	222.529	244.842	609.462	190.378	652.624	227.064	671.125	510.235	201.095	598.089	382.982	636.139	257.571	566.667	222.912
1575	Syne3	55.3642	-2.90359	0.261349	-11.11	1.12162e-28	1.35192e-27	106.266	21.9202	82.9224	6.90677	71.4715	15.1731	10.7771	62.0812	7.33971	150.165	19.0813	139.967	94.3588	13.3084	56.1629	21.0177	114.161	13.372	90.5631	10.2695
1576	Bbx	1090.06	0.962835	0.0867058	11.1046	1.19129e-28	1.43499e-27	877.78	1529.29	740.566	1408.74	596.968	1884.84	1384.68	714.023	1328.62	722.122	1075.08	745.521	762.597	1581.29	812.522	1424.73	683.08	1409.85	748.278	1370.59
1577	Sec23b	1417.9	0.967669	0.0871584	11.1024	1.22089e-28	1.46972e-27	927.427	1593.57	808.605	1745.47	906.297	2010.86	1700.34	789.841	1760.52	1107.73	2071.84	1174.53	915.245	2080.19	882.927	1782.45	1167.28	2055.15	909.582	1968.14
1578	Pdpr	101.422	-2.38622	0.215033	-11.097	1.29695e-28	1.56028e-27	233.691	48.4903	172.198	46.3092	101.953	27.0006	24.117	209.699	49.1918	142.588	12.9134	103.466	233.442	21.8479	182.478	23.7551	166.764	31.6422	155.002	41.8893
1579	Clec12a	8182.79	0.634298	0.0571851	11.092	1.37154e-28	1.64898e-27	6468.78	10814.6	6577.8	10609.8	5423.64	9393.86	8744.92	6285.02	9490.55	6279.88	9772.79	6142.22	6682.81	10790.5	7095.12	9971.59	6274.91	9280.95	6887.8	10668.3
1580	Gosr1	692.149	1.19947	0.108164	11.0894	1.41156e-28	1.69601e-27	403.796	1200.66	467.223	893.429	330.563	976.834	1251.61	412.047	674.997	435.69	1200.45	436.073	446.201	740.245	422.401	894.914	428.788	968.766	392.018	866.262
1581	Tnfrsf23	126.92	-1.81788	0.163933	-11.0892	1.41623e-28	1.70055e-27	147.375	52.3886	171.064	43.9458	274.83	60.5667	44.0282	163.535	50.0963	213.134	87.8585	212.115	172.099	68.1956	265.038	68.3622	192.196	64.4098	159.702	27.4586
1582	Dguok	311.502	-1.06283	0.0959399	-11.0781	1.60297e-28	1.92356e-27	469.907	168.562	443.74	237.53	447.121	216.411	214.075	446.12	202.419	369.966	199.779	376.819	442.452	188.178	479.818	206.885	308.67	172.568	438.63	200.39
1583	Abcb8	399.446	-1.16417	0.105097	-11.0771	1.62038e-28	1.94323e-27	578.429	281.908	568.465	190.045	485.187	225.79	253.229	479.55	238.581	563.793	246.64	678.278	701.914	259.231	446.724	263.33	476.161	214.356	527.229	310.079
1584	Nadk	4213.49	1.03648	0.0935716	11.0769	1.62421e-28	1.94659e-27	3435.94	5504.35	2361.91	4935.5	2480.42	6634.43	5310.22	2438.46	5276.16	2626.03	6597.46	3661.58	3146.65	5713.5	2348.49	5264.73	2655.97	5700.57	2452.89	5724.63
1585	Tpra1	174.533	-2.46519	0.222606	-11.0742	1.67316e-28	2.00399e-27	375.411	17.837	384.879	57.3255	218.327	37.0324	21.4141	270.141	44.6033	274.752	27.1419	328.961	288.434	104.059	309.921	72.5269	300.455	71.0592	229.659	56.7299
1586	Sra1	827.396	0.877166	0.0792161	11.0731	1.69478e-28	2.02861e-27	534.732	1012.36	520.493	1069.31	550.897	1086.71	1000.45	522.062	1186.35	671.723	949.062	703.028	673.582	1112.97	547.668	1267.83	571.796	962.844	549.672	1054.4
1587	Akap8l	129.989	-2.63055	0.237654	-11.0688	1.7772e-28	2.12592e-27	213.683	91.5528	206.09	28.2239	204.52	7.93536	17.7109	231.841	31.0599	234.288	42.015	240.05	303.52	35.6073	192.103	58.4667	164.824	21.4044	226.017	48.8765
1588	Casc5	169.856	-3.4609	0.31269	-11.0681	1.79072e-28	2.14074e-27	146.335	10.8882	335.465	74.2455	354.457	15.0037	56.2314	231.195	30.2614	544.737	15.0871	385.687	130.018	10.6717	303.911	15.4031	365.733	38.6536	312.734	20.4006
1589	Pcyox1l	40.7291	-3.13199	0.283037	-11.0657	1.84081e-28	2.19924e-27	63.5075	8.42083	45.373	4.30183	75.5932	20.7952	7.12239	60.0828	5.62259	87.4811	7.38336	100.315	78.7698	1.2275	47.9559	13.1065	80.7858	8.45454	87.7975	10.4859
1590	Ms4a4b	160.042	3.09631	0.279924	11.0613	1.93382e-28	2.3089e-27	15.3162	340.503	38.8796	309.272	51.7288	449.019	397.936	50.4222	198.996	8.13887	296.087	41.5161	12.6288	323.896	33.3486	235.37	40.5349	210.775	40.7884	105.69
1591	Tmem55a	417.272	-1.01976	0.0921937	-11.061	1.93836e-28	2.31288e-27	585.945	235.169	600.199	262.935	558.439	273.234	317.451	561.927	258.49	379.073	357.996	567.185	562.725	277.282	580.797	252.457	618.307	291.73	567.93	236.179
1592	Gm4955	645.667	5.66601	0.512351	11.0589	1.98613e-28	2.36717e-27	6.9881	993.125	6.01365	1368.34	29.259	2030	1651.59	13.6267	1101.98	3.7762	982.553	19.5105	14.0226	1415.16	139.613	1143.34	6.00286	796.878	13.6813	1177.86
1593	Slc25a30	202.606	-1.6967	0.153424	-11.0588	1.98636e-28	2.36717e-27	379.451	112.879	330.238	69.8243	219.679	62.8639	69.4791	352.27	128.347	310.981	158.626	252.237	299.078	111.991	326.664	101.997	330.092	82.535	287.775	65.1062
1594	Parp11	433.832	2.08908	0.188916	11.0582	1.99998e-28	2.38191e-27	141.833	423.12	169.295	545.099	194.017	1280.44	1090.03	169.614	631.223	105.68	570.357	175.275	169.773	659.26	272.894	690.914	139.579	574.265	118.401	555.583
1595	Zfand2b	404.641	1.07834	0.0975204	11.0576	2.01341e-28	2.3964e-27	292.691	537.044	260.459	600.986	171.241	506.477	584.155	237.591	559.807	284.958	480.044	251.332	308.566	653.479	284.568	497.116	254.356	480.159	266.409	581.389
1596	Ncaph	238.185	-2.7802	0.251431	-11.0575	2.01643e-28	2.3985e-27	227.699	11.4445	319.249	63.1452	461.355	109.355	61.3949	272.458	30.4004	615.348	61.4617	594.587	291.743	27.6391	336.123	72.1082	580.683	83.5389	467.067	76.906
1597	Rprd1a	124.206	-1.56331	0.141497	-11.0484	2.23119e-28	2.65229e-27	218.43	56.3888	143.425	56.4548	142.243	68.3807	59.1515	194.731	78.6928	197.404	52.7478	175.064	209.709	66.1867	210.84	80.0867	196.048	64.0585	189.662	24.4097
1598	Actb	241963	1.41846	0.128404	11.0468	2.2711e-28	2.69804e-27	108893	335225	117071	431082	199430	352630	384625	93427.1	349487	136340	304349	174913	108945	382660	131582	357276	125563	233452	121353	390954
1599	Plscr4	62.0659	-3.03007	0.274456	-11.0403	2.44252e-28	2.89986e-27	96.5539	9.07472	174.852	6.63674	83.3695	30.3971	14.5251	105.35	7.27696	75.1121	16.9028	78.7794	105.611	4.5477	107.575	22.3301	152.228	16.489	124.01	9.69662
1600	Bub1b	305.111	-2.84136	0.257407	-11.0384	2.49434e-28	2.95953e-27	237.196	20.5325	501.297	93.7312	569.514	114.961	30.3007	430.082	36.3742	712.383	62.7016	634.495	408.088	78.534	496.039	123.199	741.862	123.092	621.541	66.2923
1601	Tmem37	135.441	-3.10365	0.281186	-11.0377	2.51265e-28	2.9794e-27	407.427	13.1735	230.769	81.6811	159.442	11.6763	25.0194	249.636	24.1231	206.118	15.5824	210.606	421.767	21.5901	192.865	18.8942	143.023	30.2627	209.807	35.3565
1602	Accs	87.3258	-2.43909	0.221047	-11.0343	2.61153e-28	3.09471e-27	149.687	25.7751	198.248	11.1214	117.051	29.5249	16.1633	104.143	16.4026	165.875	33.2214	129.353	147.292	19.0361	139.304	47.8305	138.903	44.3464	178.11	35.1277
1603	Slmo2	730.185	0.960297	0.0870452	11.0322	2.67338e-28	3.16602e-27	420.7	1078.71	440.654	998.183	503.312	777.638	860.862	437.121	1009.41	480.678	927.106	599.463	497.478	1117.88	481.808	1024.35	599.808	861.464	484.82	1002.27
1604	Idnk	285.553	1.47196	0.133457	11.0295	2.75332e-28	3.25867e-27	156.069	376.2	123.521	506.646	126.176	385.43	432.375	165.059	479.79	146.117	336.079	120.124	265.849	485.03	151.192	376.478	147.242	338.189	126.729	466.763
1605	Pparg	70.9745	-4.30442	0.390393	-11.0259	2.86761e-28	3.39181e-27	188.437	0	182.112	9.76117	164.095	3.07119	0	128.656	4.08264	111.291	8.97099	137.867	194.739	7.16277	116.812	18.3151	112.019	9.1562	17.845	5.09783
1606	Pqlc1	543.134	-1.31058	0.118957	-11.0173	3.15423e-28	3.72851e-27	868.192	365.569	817.741	291.849	480.464	245.757	248.554	842.246	312.251	904.246	290.893	602.962	859.376	398.288	790.122	309.167	792.479	301.858	776.758	363.905
1607	Zfp330	483.635	0.858651	0.0779717	11.0123	3.33236e-28	3.93663e-27	274.708	730.148	321.175	600.077	333.615	586.666	544.001	327.104	635.722	329.928	669.797	414.718	320.884	601.199	352.14	638.233	357.643	660.534	390.232	584.181
1608	Akr7a5	198.348	-1.46788	0.133314	-11.0108	3.39144e-28	4.00392e-27	376.332	119.81	273.884	99.6172	248.34	126.503	92.3324	253.626	82.5509	363.558	89.3325	234.391	394.684	117.628	263.422	97.2551	244.348	109.889	257.555	121.906
1609	Hmgcl	920.529	-1.14267	0.103786	-11.0098	3.42777e-28	4.0443e-27	1369.64	567.274	1414.35	445.537	941.188	508.403	511.106	1320.61	542.412	1311.33	489.046	1052.52	1558.92	661.904	1332.47	685.374	1143.1	687.265	1240.66	627.47
1610	Ccnyl1	80.7221	1.7593	0.159797	11.0096	3.43505e-28	4.05037e-27	32.3351	72.3234	34.1866	145.201	40.4996	137.208	129.037	22.8258	184.041	35.3869	114.224	39.4613	45.6814	101.864	37.5108	113.749	44.0391	105.074	43.0645	136.731
1611	Sesn2	201.229	-1.20954	0.109864	-11.0094	3.44298e-28	4.0572e-27	287.378	143.296	206.7	101.022	267.255	148.393	93.1251	255.84	112.456	309.137	132.252	319.061	333.555	114.533	257.982	112.421	285.376	134.01	275.148	135.644
1612	Gins4	288.614	-1.23125	0.111846	-11.0084	3.47994e-28	4.09822e-27	290.846	122.879	349.472	152.97	377.425	194.912	167.817	371.543	164.553	510.27	194.461	426.636	451.13	161.309	386.817	180.464	462.561	219.588	434.332	152.285
1613	Fam83d	58.9265	-2.77501	0.252159	-11.005	3.61413e-28	4.2536e-27	50.7795	13.2598	84.8443	28.6367	97.5715	9.41257	13.5061	94.035	11.7542	156.071	15.469	129.211	91.1187	11.614	80.4261	10.5869	134.699	26.6429	110.628	8.2636
1614	Smg7	559.076	1.2978	0.117954	11.0025	3.71558e-28	4.37029e-27	256.323	1030.9	369.759	893.858	338.998	664.031	834.706	237.684	717.973	346.834	639.596	355.067	233.046	926.759	383.586	775.857	365.114	625.412	337.132	848.879
1615	Ptprc	8659.99	0.932555	0.084763	11.0019	3.74073e-28	4.39716e-27	6500.73	11038	6608.29	13898.8	4359	10671.6	12249.5	6515.86	11197.7	5089.32	10530.1	5157.54	6136.77	10980.1	6958.44	10989.4	6318.46	11849.7	5913.93	10236.6
1616	Cry1	207.575	1.64213	0.149281	11.0002	3.81258e-28	4.47884e-27	95.4066	399.836	87.3799	242.151	79.1078	184.059	335.435	89.2499	338.62	111.635	378.741	102.957	162.231	385.535	75.9845	336.438	99.682	301.16	104.408	241.494
1617	Gpr65	193.184	-2.13221	0.193866	-10.9984	3.89106e-28	4.56821e-27	436.001	117.731	344.085	41.5929	327.77	113.688	82.6451	346.349	67.9472	200.169	68.7839	210.875	368.526	87.744	369.743	58.4742	248.081	52.5422	288.353	32.5856
1618	Tmc3	153.724	3.01923	0.274594	10.9952	4.02811e-28	4.72618e-27	14.5213	227.211	29.8179	205.249	49.772	590.733	321.788	39.992	285.231	36.7303	260.21	67.0593	17.5166	241.766	47.0647	204.605	22.016	243.76	12.3489	157.084
1619	Appl1	687.43	1.09621	0.0997014	10.9949	4.04205e-28	4.73961e-27	461.688	868.364	449.008	801.07	534.719	966.065	982.13	526.427	1021.65	302.814	1027.48	398.101	424.939	884.431	385.659	892.09	375.404	837.436	518.431	1090.7
1620	Akr1b10	455.937	-1.073	0.0976261	-10.9909	4.22525e-28	4.95137e-27	613.946	276.852	534.118	247.784	632.132	371.074	238.094	583.935	271.917	611.092	299.129	749.722	719.018	267.921	620.297	285.368	565.89	371.989	552.901	305.559
1621	Psmb7	1566.14	0.878324	0.0799202	10.99	4.26912e-28	4.99969e-27	854.193	2126.16	1095.92	1996.09	1038.49	1677.77	2244.41	979.608	1913.52	1198.91	1763.73	1289.98	1164.21	2154.4	1161.44	2223.16	1193.88	1937.55	1056.33	2253.1
1622	Cd2ap	358.531	1.32268	0.120426	10.9834	4.59556e-28	5.37868e-27	214.258	606.732	224.781	505.131	195.973	680.06	343.193	192.141	616.583	171.776	481.137	193.537	153.516	474.834	233.617	548.804	232.657	487.999	236.981	376.916
1623	Trappc1	704.858	-0.855766	0.0779545	-10.9778	4.88881e-28	5.71837e-27	863.652	420.18	846.636	531.192	1034.36	453.858	531.563	881.144	408.524	999.071	559.424	835.776	848.107	516.866	986.579	607.686	875.682	491.9	909.898	495.062
1624	Hrc	21.1831	3.95455	0.360276	10.9765	4.95983e-28	5.79787e-27	3.49407	34.8302	1.80783	43.0801	4.42359	27.8748	59.0671	1.95403	29.4949	0.947463	53.2786	3.56681	2.55242	55.9678	2.41459	29.2038	1.71767	12.6399	1.0555	54.2905
1625	Vps8	382.973	-1.06663	0.0971885	-10.9749	5.04813e-28	5.89746e-27	619.07	262.316	507.846	226.879	438.404	284.241	280.995	505.634	207.956	526.117	213.903	531.096	507.162	211.154	543.583	218.982	493.097	336.198	515.104	229.721
1626	Phtf2	577.847	1.19516	0.108949	10.97	5.32948e-28	6.22231e-27	364.602	1016.6	341.218	689.189	429.226	932.714	693.571	288.123	680.314	343.233	724.351	429.93	333.819	849.331	307	611.458	354.735	945.309	303.037	919.179
1627	Keap1	852.056	1.05647	0.096322	10.9681	5.43927e-28	6.3466e-27	630.756	961.334	458.233	1117.32	479.444	908.781	1280.8	546.017	1337.73	627.026	1151.1	477.991	607.51	1176	605.354	1130.16	567.322	959.514	544.493	1474.25
1628	Ptplad2	1032.09	-2.00291	0.182755	-10.9595	5.98291e-28	6.97663e-27	2170.82	344.428	2047.53	511.758	1125.94	394.13	486.221	2020.87	424.683	1109.62	244.176	755.163	2161.9	430.747	2229.95	482.71	1149.2	427.827	1762.23	361.828
1629	Vamp8	2545.15	0.861925	0.0787102	10.9506	6.59972e-28	7.69116e-27	1820.84	2996.42	1934.33	3898.77	1757.53	3017.84	3351.41	1645.73	3200.93	1770.15	2744.39	1763.46	2043.19	3481.81	2080.98	3731.2	1511.21	2776.14	1759.58	3617.05
1630	Exosc7	148.715	-1.71937	0.157096	-10.9447	7.04565e-28	8.2058e-27	209.683	92.2231	197.509	28.0665	226.156	68.3433	53.6042	205.526	73.4907	275.861	72.5438	264.554	217.383	56.2175	190.914	94.1554	256.199	97.8276	234.855	59.1938
1631	Appbp2	561.334	0.637422	0.0582494	10.943	7.18119e-28	8.35853e-27	438.467	684.339	444.741	711.649	446.265	659.608	616.997	452.624	714.89	392.438	638.01	438.495	435.096	718.051	432.17	757.39	475.724	722.578	450.667	596.476
1632	Slc25a33	80.8993	1.90942	0.17471	10.929	8.37244e-28	9.73912e-27	38.321	135.318	35.553	114.377	28.1814	139.722	128.341	21.546	147.979	44.6276	130.306	36.5473	22.94	128.412	53.1973	153.618	43.7637	93.4559	15.8514	105.929
1633	Mitf	647.709	1.19356	0.109222	10.9279	8.48031e-28	9.85855e-27	485.574	990.938	383.409	1043.78	339.639	878.158	921.847	489.702	1053.48	243.645	838.457	435.851	412.078	803.222	365.094	812.657	376.174	947.048	408.927	724.492
1634	Hmgb2	455.786	-1.42427	0.130335	-10.9278	8.49107e-28	9.86502e-27	408.274	226.23	631.541	254.029	788.655	297.921	257.015	511.607	233.19	825.681	201.298	766.269	500.468	220.084	623.916	273.114	846.584	249.795	744.928	255.122
1635	Zfp157	115.337	-1.93483	0.177074	-10.9267	8.59389e-28	9.97838e-27	164.359	34.3817	227.043	47.3504	169.857	84.9927	35.3335	233.887	38.3154	150.567	33.7574	190.203	158.312	34.1814	203.167	60.0885	183.316	73.2034	154.465	29.9591
1636	Fam222b	387.62	1.12474	0.102976	10.9223	9.01563e-28	1.04617e-26	280.45	535.267	227.404	540.377	272.783	439.534	519.015	204.02	643.041	293.268	563.251	236.125	256.067	603.94	191.52	550.185	261.864	389.49	213.873	530.932
1637	Zbtb21	430.928	1.19563	0.109479	10.9211	9.14057e-28	1.06002e-26	215.127	638.432	252.348	680.335	227.934	552.699	508.615	192.588	584.286	360.284	650.588	251.064	283.706	581.741	328.168	533.548	222.853	569.063	289.501	695.669
1638	Mob1b	530.088	1.40501	0.128657	10.9206	9.18916e-28	1.065e-26	279.705	756.718	271.526	978.135	363.478	841.425	860.932	335.159	838.251	153.795	631.456	293.879	263.043	786.7	341.485	757.393	319.466	706.527	287.683	535.001
1639	Cdc14b	91.8989	-1.91223	0.175117	-10.9197	9.28118e-28	1.07501e-26	175.228	20.0563	172.65	38.437	131.245	40.1485	44.6135	159.276	34.3801	128.084	48.9504	107.685	158.364	36.0937	172.23	37.2434	125.202	64.6271	130.913	12.5519
1640	Psmc5	1662.44	1.00174	0.0917611	10.9168	9.57837e-28	1.10876e-26	849.662	2412.57	951.739	2069.04	1020.67	1936.87	2111.42	928.78	2110.7	1376.48	2445.55	1427.92	1045.69	2202.14	1216.02	2418.8	1139.51	2246.95	1106.72	2231.53
1641	Lbh	68.3042	-2.03189	0.186137	-10.9161	9.65317e-28	1.11622e-26	109.529	21.5766	89.164	25.0789	146.678	49.0173	22.0115	91.0407	20.0285	146.959	22.5602	99.5136	90.0676	20.2166	99.4028	27.9251	129.71	27.9752	95.2975	32.3331
1642	Uchl3	203.967	-1.30367	0.119426	-10.9161	9.65459e-28	1.11622e-26	256.592	48.7945	291.528	95.0268	326.821	160.507	109.865	228.128	122.141	279.313	116.055	328.958	289.469	125.467	340.094	108.884	304.551	139.266	279.81	128.076
1643	Cbr1	300.982	-1.46938	0.134635	-10.9138	9.90278e-28	1.14421e-26	481.968	202.255	429.593	93.5576	368.958	107.313	186.813	382.049	149.854	461.399	160.292	422.456	589.043	128.24	466.114	178.617	395.496	195.361	413.497	206.757
1644	Zcchc8	223.555	-1.12811	0.103377	-10.9125	1.00405e-27	1.15942e-26	333.342	169.169	293.479	105.481	260.686	122.008	152.314	272.627	123.273	317.362	158.249	354.537	280.036	185.832	324.093	126.892	319.867	145.588	296.085	130.185
1645	Etv5	429.078	-1.80532	0.165493	-10.9088	1.04672e-27	1.20796e-26	560.317	200.589	488.097	170.172	1004.14	134.155	195.052	412.598	189.235	735.73	197.004	1035.91	502.92	231.188	477.532	180.919	770.739	197.712	676.434	221.11
1646	6430531B16Rik	40.7932	-3.1235	0.286334	-10.9086	1.04865e-27	1.20945e-26	56.2252	0	61.8937	6.87639	83.1281	9.65751	7.35143	59.8988	8.44796	101.612	0	129.263	69.6574	4.70563	51.0832	14.5598	78.5538	11.7962	47.7522	13.4025
1647	Entpd1	622.811	-2.42045	0.221985	-10.9037	1.10689e-27	1.27585e-26	1564.88	150.977	1505.23	206.273	707.22	227.071	320.285	1340.54	176.71	538.391	173.475	580.205	1694.91	238.58	928.277	194.826	588.246	123.218	1053.25	143.66
1648	Calcrl	1850.09	2.3849	0.218726	10.9036	1.10792e-27	1.27626e-26	354.852	3698.25	454.805	3377.09	974.76	3095.34	2778.99	607.882	2962.51	350.985	3433.16	1416.6	298.792	2997.18	465.611	2827.2	593.158	3454.77	418.68	2441.23
1649	Stxbp1	543.223	1.38914	0.127546	10.8913	1.26779e-27	1.45953e-26	231.135	684.908	274.198	842.814	304.487	582.956	543.395	264.387	870.135	359.378	839.852	227.217	402.774	986.071	304.438	849.178	377.205	805.176	263.005	851.76
1650	Iqgap1	15405.9	0.659754	0.060609	10.8854	1.35298e-27	1.55667e-26	12746.4	18323.1	12363.6	20776.1	9729.59	17808.6	20755.9	10956.9	17789.2	12746.5	17959.1	12055.9	12169.7	18564.8	12166.8	17486.8	12872.7	18073.8	11625.8	21145.9
1651	Coa6	94.8438	-1.77818	0.163359	-10.8851	1.35739e-27	1.5608e-26	180.077	13.3441	147.206	51.8975	132.671	34.9911	40.9339	149.012	28.1245	137.772	52.5247	157.266	145.201	55.6809	189.867	55.1454	128.847	55.1685	108.454	32.6932
1652	Rab11a	3739.1	0.98579	0.0905826	10.8828	1.39256e-27	1.60027e-26	2747.55	5461.53	2415.18	5284.99	2577.31	5354.19	5293.04	2036.2	4796.47	2426.17	3566.29	3211.27	2459.38	5412.83	2837.5	5137.5	2189.47	4555.67	2194.66	4824.75
1653	Rnase10	37.0389	3.2462	0.29844	10.8772	1.48e-27	1.69972e-26	12.4324	53.7704	10.4821	34.9696	13.5594	52.1652	70.8612	7.66055	84.9659	4.87089	79.1098	3.75769	6.5097	106.599	2.47864	91.1084	7.01752	52.8747	1.08292	44.5014
1654	Actr2	6762.98	1.00062	0.0919964	10.8767	1.4878e-27	1.70764e-26	3991.46	9218.5	4417.6	9729.84	5409.35	8864.34	9842.76	4161.81	8500.51	3156.49	8397.24	5156.26	3740.46	9391.44	5633.58	9656.31	4732.82	8101.68	4670.8	8486.37
1655	Tk1	297.426	-2.83919	0.261097	-10.8741	1.53207e-27	1.75739e-26	212.681	106.252	350.208	35.1034	667.039	113.617	63.7791	278.052	73.56	839.601	46.8616	858.096	282.194	63.1225	359.555	66.7393	795.552	97.1659	571.808	67.5413
1656	Opa3	836.517	1.09587	0.100809	10.8707	1.58983e-27	1.82255e-26	527.682	1175.13	500.042	1163.96	441.193	791.128	961.598	464.815	1193.45	657.419	1337.43	629.237	520.725	1344.93	535.449	1057.7	546.063	1046.82	500.057	1335.5
1657	Nck1	754.685	1.2309	0.113251	10.8688	1.62403e-27	1.86063e-26	488.302	1128.23	452.637	1000.43	341.669	755.363	1384.08	519.713	1118.67	363.099	1056.32	354.027	469.214	1244.22	509.965	1037.14	506.825	989.388	508.412	866.01
1658	Fam46a	309.141	1.90476	0.175289	10.8664	1.6673e-27	1.90905e-26	149.09	458.163	142.131	662.961	95.9023	579.281	503.798	132.575	511.461	73.3943	284.809	91.2596	143.064	483.261	242.475	501.418	101.43	396.375	142.045	487.916
1659	Cbx8	30.8781	-4.19724	0.386337	-10.8642	1.70739e-27	1.95377e-26	39.2755	0	54.7929	10.2547	46.505	10.2893	2.59347	76.5927	4.50215	69.223	0	38.166	82.4899	1.48845	47.01	0	73.0352	0	61.3443	0
1660	Ncapd2	276.723	-3.21518	0.295963	-10.8634	1.72128e-27	1.96849e-26	284.983	10.8096	471.77	37.1573	663.924	94.6722	45.4791	323.687	70.6057	842.503	54.1902	709.148	300.559	26.8882	297.78	48.1285	631.27	26.6107	451.021	143.268
1661	H2-Q4	102.637	2.09878	0.193334	10.8557	1.87319e-27	2.14092e-26	46.1222	100.169	59.2358	253.569	44.1661	182.762	201.089	43.9179	129.121	28.7586	217.922	35.2211	33.0622	129.215	37.8531	95.7726	23.7734	158.982	34.5738	197.446
1662	Gstt1	26.8715	2.99663	0.276165	10.8509	1.97513e-27	2.25607e-26	6.74383	39.0193	7.68551	40.7965	4.7431	52.3136	36.0182	5.34493	43.6043	4.70592	79.3983	10.2536	2.48508	55.8422	7.16567	30.0075	2.93547	38.4277	3.12809	66.8111
1663	Tceb3	1652.36	0.729257	0.0672122	10.8501	1.99265e-27	2.27472e-26	1355.92	2154.95	1323.37	2094.79	1013.51	2087.13	2259.92	1258	2003.52	1154.77	1780.28	1149.03	1436.29	2218.68	1199.72	1905.93	1241.79	1907.81	1310.54	2191.25
1664	Btf3	2246.96	0.746772	0.0688329	10.8491	2.01475e-27	2.29856e-26	1820.51	2989.46	1715.88	3146.35	1661.25	2677.85	2830.61	1535.56	2872.27	1377.08	2266.22	1901.73	1629.15	3042.62	1823.63	2918.18	1587.39	2606.52	1736.48	2800.48
1665	Dcbld2	642.127	1.61976	0.149305	10.8487	2.02374e-27	2.30743e-26	283.866	900.344	287.456	947.097	485.44	1087.39	906.437	452.538	1213.24	267.887	1071.42	225.983	178.005	864.612	374.323	864.472	242.577	832.692	361.952	994.804
1666	Nanp	111.831	-1.62306	0.149659	-10.8451	2.10488e-27	2.3985e-26	161.586	29.7109	169.695	55.7029	156.064	47.5004	39.7827	191.519	69.6742	131.795	66.9774	173.567	150.709	30.1198	190.048	69.0595	166.535	65.2693	204.267	67.0358
1667	AI607873	2836.91	1.44992	0.133727	10.8424	2.16721e-27	2.46805e-26	1289.86	3591.28	1496.06	5426.45	1186.9	4214.76	4094.73	1296.22	3779.08	1358.78	3045.08	1389.74	1493.81	4523.53	2756.78	3767.9	1448	4330.24	1499.59	4749.47
1668	Tnfrsf13b	251.52	-1.37014	0.126402	-10.8396	2.23459e-27	2.54325e-26	322.881	156.58	383.556	88.7313	422.542	200.123	117.585	284.288	140.627	408.598	157.491	443.439	390.286	141.263	305.856	152.463	338.251	137.088	316.953	121.795
1669	B4galnt1	283.992	-1.46754	0.135549	-10.8267	2.57281e-27	2.92644e-26	441.97	121.913	379.645	118.842	279.788	122.099	122.561	377.148	175.42	586.509	140.83	426.165	423.687	200.973	397.213	166.887	501.551	181.826	373.656	141.157
1670	Psmb5	2556.78	0.934969	0.0863724	10.8249	2.62496e-27	2.98396e-26	1667.83	3408.02	1554.3	2949.75	1815.71	2571.09	3474.45	1373.07	3667.59	1927.57	3726.86	2068.87	1738.11	3332.99	1943.23	3975.02	1788.34	3021.59	1679.01	3452.26
1671	Tsen15	120.061	-1.63241	0.150845	-10.8218	2.71377e-27	3.08308e-26	143.41	87.8938	130.174	52.5037	209.983	56.4758	51.7142	155.623	60.6141	256.182	78.0144	231.846	171.944	55.6612	180.409	59.8444	172.346	49.1957	148.305	49.0743
1672	Ccdc166	25.6959	-3.32436	0.307303	-10.8179	2.83316e-27	3.21679e-26	59.3116	0	35.2115	1.52692	42.6285	4.09496	3.03583	46.1874	7.53678	45.0654	0	53.6996	55.099	8.6483	45.1599	5.35957	41.0315	4.99655	55.3257	0
1673	Cdkn2c	60.2704	-2.48159	0.2295	-10.813	2.98693e-27	3.38935e-26	89.4764	19.5423	136.858	33.2286	85.3431	5.06738	18.4688	128.881	24.1988	71.7042	10.3753	82.8488	128.221	9.31134	100.892	16.4414	99.3581	19.2839	98.4658	27.4425
1674	Ctdnep1	266.312	1.20197	0.111172	10.8118	3.02834e-27	3.43429e-26	172.18	439.041	152.087	398.182	205.981	455.539	361.199	162.442	399.32	174.428	372.372	151.379	148.223	356.401	179.648	351.253	128.292	248.401	134.925	334.946
1675	Arhgef39	62.5994	-2.97065	0.274767	-10.8115	3.03579e-27	3.44069e-26	68.5003	0	80.33	14.7599	92.0818	27.7832	5.20259	75.9558	9.44118	167.889	28.761	130.191	108.257	25.7548	113.9	8.44111	133.528	13.2826	132.839	15.0905
1676	Meis1	40.3129	-2.54013	0.235087	-10.805	3.25814e-27	3.69049e-26	67.2257	14.0967	76.4094	6.26327	60.8903	21.079	14.5421	60.6474	6.65338	65.4843	4.27353	75.0035	71.555	18.2352	54.9777	11.9268	72.8817	5.14125	71.1544	27.8179
1677	Cdca3	386.554	-2.5442	0.235701	-10.7942	3.66639e-27	4.15044e-26	285.955	20.2902	634.266	128.07	678.82	119.266	122.164	450.743	93.4721	1007.97	166.571	828.464	460.545	66.1813	584.566	125.055	916.887	154.893	748.608	138.29
1678	Ccl2	22234.1	5.20245	0.482048	10.7924	3.73926e-27	4.2304e-26	245.619	28867	344.981	43919.2	2752.57	42092	58528.9	307.682	44056.8	1232.99	36423.6	3925.7	501.124	49500.7	846.143	53354.5	1020.93	30997.9	576.446	45186.8
1679	Slc25a25	650.447	1.60992	0.149229	10.7883	3.91042e-27	4.42141e-26	274.923	1017.41	222.736	1057.9	321.15	700.889	992.115	230.617	1056.8	480.5	982.975	386.148	219.916	1063.64	236.748	945.876	348.53	920.055	492.417	1057.59
1680	Guf1	123.515	-1.64234	0.152305	-10.7832	4.13137e-27	4.66845e-26	175.702	21.5927	188.944	64.868	167.876	39.125	62.7922	209.921	50.9834	168.709	95.1504	170.54	148.323	43.796	251.007	67.054	187.622	84.4786	207.88	63.9406
1681	Abr	2761.65	1.03649	0.0961256	10.7827	4.1557e-27	4.69314e-26	1962.4	3501.83	1485.44	3721.92	1610.11	3754.71	3623.5	1702.96	3937.42	1888.51	4178.64	2700.82	1666.74	3810.87	1604.12	3002.59	1763.68	3518.23	1703.1	4095.36
1682	Foxm1	111.774	-2.90992	0.26995	-10.7795	4.30315e-27	4.85678e-26	94.682	16.4664	152.481	55.5952	233.827	40.7961	11.1523	124.47	17.212	303.444	22.0771	220.46	113.584	17.0637	167.878	22.6513	283.712	27.6441	275.616	34.6689
1683	Farsa	961.304	0.903826	0.0838808	10.7751	4.51211e-27	5.08959e-26	627.059	1151.87	593.951	1162.82	617.888	1184	1115.89	588.971	1315.86	798.975	1228.16	822.841	660.01	1498.81	720.747	1285.96	649.891	1121.17	617.062	1464.14
1684	Ska3	88.3498	-2.81344	0.261154	-10.7731	4.61255e-27	5.1998e-26	64.5956	13.0692	140.408	16.3405	164.2	11.9269	22.145	135.881	17.8555	203.808	45.7423	188.733	114.822	10.1749	148.547	12.5216	203.934	42.7937	174.206	35.2937
1685	Brd4	805.292	0.798858	0.0741626	10.7717	4.68281e-27	5.27587e-26	683.312	1271.88	521.268	1004.29	498.031	976.503	961.32	581.778	1150.66	676.342	971.338	562.315	575.856	976.939	575.57	974.998	568.491	938.17	632.628	1004.15
1686	Ccdc32	246.789	-0.871876	0.080996	-10.7644	5.06674e-27	5.70504e-26	326.384	167.879	342.652	211.912	279.818	165.22	140.002	310.426	166.816	307.241	211.187	310.294	338.258	155.968	324.184	166.929	306.279	189.104	336.851	178.384
1687	Ankrd10	162.171	-2.87194	0.266846	-10.7625	5.17232e-27	5.82047e-26	372.274	104.663	251.208	29.1708	177.657	36.3845	18.0271	269.612	31.7133	390.657	52.9194	209.79	413.77	26.7184	149.77	12.6686	303.841	54.8697	279.514	58.1984
1688	Rmnd5b	323.104	-1.17588	0.109296	-10.7587	5.39423e-27	6.0666e-26	440.128	138.967	474.257	228.094	376.375	129.788	180.872	480.515	226.566	512.935	230.319	410.73	477.287	198.8	384.365	208.919	457.979	248.839	477.276	179.075
1689	Bcs1l	74.4383	-1.90058	0.176725	-10.7545	5.64618e-27	6.34619e-26	101.477	40.4244	97.3046	37.9582	113.469	33.9357	24.843	93.1536	23.9201	174.523	27.7737	133.073	134.318	29.9651	103.606	52.0918	110.476	29.9559	109.775	16.7235
1690	C130050O18Rik	84.0557	-2.80527	0.260963	-10.7497	5.94646e-27	6.67974e-26	93.6657	33.4513	100.542	4.86338	112.381	13.7678	27.0699	120.652	32.198	248.899	16.8706	238.439	116.31	12.9003	137.477	25.2709	175.805	27.6653	128.053	14.8329
1691	Heatr5a	622.382	-1.05052	0.0977369	-10.7485	6.02606e-27	6.76515e-26	940.704	376.642	771.969	436.799	624.623	447.491	457.281	813.979	378.507	855.291	382.326	988.578	858.886	436.722	868.926	337.537	888.35	308.36	775.861	498.815
1692	Nav1	706.878	-1.37032	0.1276	-10.7392	6.66381e-27	7.4767e-26	850.529	301.995	844.268	388.342	871.587	378.691	309.703	1045.7	344.308	1174.04	588.946	998.451	884.819	302.539	1124.43	448.784	1368.69	371.68	992.509	547.548
1693	Ubac1	106.877	-1.55223	0.144567	-10.7371	6.81233e-27	7.63882e-26	160.514	76.3885	122.259	44.8201	149.299	70.5828	54.224	187.531	43.5694	174.524	38.015	164.091	186.527	49.7646	121.939	50.1612	180.985	71.1132	133.91	57.3171
1694	Dhrs7	292.183	-1.55916	0.145218	-10.7367	6.84489e-27	7.67081e-26	466.845	100.884	429.012	187.132	306.287	88.483	150.183	430.388	118.631	487.167	135.926	361.905	551.678	124.487	463.078	160.467	456.216	183.433	413.046	228.401
1695	Ranbp6	66.0527	-2.11075	0.196607	-10.7359	6.90616e-27	7.7349e-26	135.135	26.0186	128.36	20.7993	112.363	14.7595	8.87363	116.323	25.9703	84.0432	11.295	90.136	109.985	26.7305	75.8909	34.3159	104.052	36.8774	121.158	37.9682
1696	Ptpn11	549.569	0.97517	0.0908788	10.7304	7.32436e-27	8.19845e-26	371.735	664.353	345.215	906.923	419.67	614.93	669.322	347.455	780.965	446.589	643.254	373.502	361.19	890.695	306.375	764.989	396.747	638.183	342.652	706.643
1697	Rgl1	410.128	2.21252	0.206228	10.7285	7.47807e-27	8.36557e-26	173.321	610.631	157.644	782.708	205.147	1194.6	557.481	123.044	695.582	95.8133	492.692	207.732	205.006	780.074	89.5372	509.595	77.6604	378.238	123.462	742.596
1698	Iffo1	207.185	-1.4742	0.137677	-10.7077	9.3669e-27	1.04724e-25	359.275	101.576	332.283	62.6887	226.364	125.623	107.243	283.247	134.732	337.808	112.34	211.658	369.958	117.275	294.132	92.7866	318.885	108	315.867	131.956
1699	Pcmt1	1310.97	0.783404	0.0731772	10.7056	9.58407e-27	1.07089e-25	925.885	1773.08	973.134	1820.81	890.149	1432.42	1466.29	855.481	1708.57	1050.27	1387.07	1002.91	943.99	1703.15	843.267	1718.62	1061.14	1635.57	1087.28	1940.33
1700	Gpbp1	622.643	1.16348	0.108688	10.7048	9.66099e-27	1.07885e-25	368.751	946.179	385.861	820.714	335.378	1001.49	1040.66	364.741	795.052	331.078	632.052	470.967	348.282	961.878	371.45	916.591	380.128	902.473	491.975	587.167
1701	Mrpl30	685.631	0.858975	0.0802622	10.7021	9.94785e-27	1.11023e-25	507.055	1081.41	526.327	769.799	454.276	754.953	994.673	416.22	818.081	506.715	852.409	491.089	464.504	899.051	595.842	980.623	442.788	825.141	461.678	869.978
1702	Dnaaf2	79.1703	-1.79164	0.16742	-10.7015	1.00157e-26	1.11715e-25	138.409	43.4292	88.5856	35.6547	106.234	33.4089	32.5181	116.971	35.6772	151.278	34.0209	143.636	122.678	20.3608	148.291	46.847	131.937	40.7883	80.1251	32.5555
1703	Fam58b	192.039	-1.12726	0.105413	-10.6937	1.08919e-26	1.21416e-25	276.319	105.551	285.591	124.742	213.419	116.287	145.612	253.936	115.999	243.646	117.368	253.781	258.941	90.1444	276.793	115.597	298.309	161.191	284.179	103.384
1704	Rasa4	4088.52	1.37514	0.128596	10.6934	1.09235e-26	1.21697e-25	3624.75	5443.32	2364.25	7058.66	1616.19	6446.9	5993.06	2258.42	5824.55	2008.16	5276.63	1737.04	2816.1	5934.13	2313.05	4642.84	1955.92	4967.15	2065.3	7424.06
1705	Fbxo10	45.6559	-2.78706	0.260675	-10.6917	1.11308e-26	1.23934e-25	76.9274	11.1799	68.3645	8.93771	48.682	23.0665	7.62638	107.463	5.9962	77.963	14.4242	58.6525	111.315	15.9103	77.5798	7.9404	72.7976	10.0082	89.6367	18.6459
1706	Tbc1d14	539.308	-1.48363	0.138775	-10.6909	1.12296e-26	1.24961e-25	850.057	386.312	926.802	291.783	581.382	319.73	179.528	812.379	312.542	648.431	308.347	814.251	1044.85	197.121	788.964	211.635	677.272	292.249	767.139	375.385
1707	Spdl1	283.044	-2.30342	0.215459	-10.6908	1.12401e-26	1.25004e-25	292.255	46.7708	455.804	55.6194	436.452	63.0573	93.4787	348.883	66.3457	601.688	179.623	509.883	334.957	71.7672	439.846	100.767	673.72	167.583	600.134	122.239
1708	Acaa2	577.393	-1.13517	0.106194	-10.6896	1.13913e-26	1.26611e-25	845.202	223.331	786.346	411.417	613.396	435.209	337.396	747.493	339.781	923.491	367.276	718.841	951.661	329.102	778.772	294.352	785.206	437.757	803.251	418.584
1709	Prr5l	301.71	2.14456	0.200678	10.6866	1.17631e-26	1.30667e-25	116.709	548.109	78.5524	398.907	103.284	309.732	573.057	119.928	605.962	176.771	501.859	45.58	158.384	555.984	159.376	460.301	75.4764	343.215	89.3546	613.65
1710	Zmym6	116.933	-1.73174	0.162071	-10.6851	1.19519e-26	1.32687e-25	161.909	90.7262	188.297	46.1186	164.667	79.6394	63.8976	242.103	48.2281	143.849	49.0265	185.693	140.571	55.4269	229.842	48.0837	182.96	47.5578	147.261	22.8051
1711	Fam50a	525.127	-0.850973	0.0796513	-10.6837	1.21287e-26	1.34571e-25	699.965	334.948	752.687	389.249	601.626	312.621	372.203	684.548	390.377	747.603	325.127	680.707	692.316	317.138	617.974	446.392	679.185	426.111	618.042	413.714
1712	Suox	38.6994	-2.66725	0.249694	-10.6821	1.23462e-26	1.36904e-25	62.9405	0	102.485	17.8335	47.0232	13.2901	13.297	72.3072	10.8699	70.1222	11.4119	41.5557	65.1232	7.63544	76.0768	7.30218	58.43	11.6706	79.1826	5.43083
1713	Dag1	715.406	-1.26942	0.118912	-10.6753	1.32874e-26	1.47255e-25	1033.24	391.375	1101.44	416.069	854.173	364.697	397.277	947.203	378.295	1208.66	395.492	621.573	1068.91	500.333	931.949	350.9	1186.84	423.373	1154.09	582.235
1714	Galc	615.196	-2.20823	0.206858	-10.6751	1.331e-26	1.47419e-25	1373.76	238.699	1279.98	286.728	1243.48	132.541	238.035	1075.46	227.201	669.027	124.518	361.707	1266.84	260.904	1044.88	331.925	841.656	170.868	967.524	168.177
1715	Lgals3bp	8913.22	2.37808	0.222833	10.672	1.37561e-26	1.52271e-25	2348.38	15635.7	1920.99	15752.7	2299.2	14017.8	15094.4	1983.3	16661.1	1942.51	14215.7	2772.85	2554.45	15824	8699.55	14036.1	2062.67	11898.8	2077.9	16361.9
1716	Smim11	117.059	-1.43483	0.134477	-10.6697	1.41012e-26	1.56001e-25	163.719	26.9293	152.966	55.4173	165.558	65.8983	51.3483	166.76	58.9904	150.188	60.9537	199.173	201.805	55.7224	189.327	67.4384	164.555	102.26	170.413	71.7664
1717	Psma7	2553.44	0.865176	0.0811093	10.6668	1.45577e-26	1.60957e-25	1693.1	3373.52	1675.47	3675.56	2054.87	2358.24	3173.6	1572.36	3357.84	2028.83	3137.99	1901.32	1669.95	3448.63	2059.29	3714.72	1733.69	3203.4	1711.03	3525.34
1718	Myo10	1361.63	1.55699	0.14605	10.6607	1.55426e-26	1.71746e-25	915.245	2062.96	628.784	2948.57	991.614	2155.91	2457.74	647.404	2217.55	571.825	1325.88	815.621	653.324	1944.28	465.021	1537.76	653.534	1659.45	562.86	2017.3
1719	Rps5	5162.17	0.928402	0.087106	10.6583	1.59485e-26	1.76129e-25	4208.4	6592.16	3651.34	8302.1	3434.32	6113.59	6845.12	3491.65	6953.42	3716.7	5763.96	3685.39	3444.2	6837.21	3593.33	7201.29	3203.57	4888.26	3135.01	8182.29
1720	Ppp2r1b	711.661	0.807354	0.0758116	10.6495	1.7534e-26	1.93527e-25	474.059	889.335	492.92	929.747	475.432	980.42	908.68	468.397	839.587	515.508	908.006	601.816	614.461	997.301	485.481	716.801	547.456	912.289	495.143	980.388
1721	Stau1	1035.05	1.02803	0.0965443	10.6483	1.77671e-26	1.95985e-25	787.833	1386.14	777.777	1532.34	519.143	1340.39	1529.36	627.203	1337.01	701.86	1132.49	567.975	831.584	1554.38	739.641	1192.64	614.213	1228.77	654.62	1645.71
1722	Pdcl3	606.332	0.950851	0.0893294	10.6443	1.85312e-26	2.04295e-25	351.987	954.405	415.585	762.929	379.952	546.302	738.434	385.948	804.657	403.834	789.609	450.874	421.344	871.846	443.837	911.956	443.644	893.852	431.081	724.56
1723	Hfe	445.371	-1.22587	0.115237	-10.6378	1.9881e-26	2.19049e-25	642.214	367.208	685.054	361.877	539.981	270.213	275.082	662.668	256.086	657.013	296.684	577.235	706.373	279.247	611.139	174.834	523.185	232.48	595.466	193.379
1724	Gm11699	37.6716	-3.09289	0.290832	-10.6346	2.05695e-26	2.26503e-25	63.1449	13.3472	86.5699	5.99041	42.5454	4.94617	13.062	92.5021	9.02752	56.7232	20.1043	66.5799	56.6979	0	44.2301	6.36326	73.0322	11.8335	86.7331	0
1725	Tbc1d16	54.77	-3.67697	0.345832	-10.6323	2.10956e-26	2.32161e-25	157.344	0	109.09	8.91539	40.426	9.42963	16.2792	97.2277	5.03749	129.235	15.0055	42.7781	135.68	3.82006	98.7142	15.5837	120.89	1.93987	85.2926	2.71147
1726	Caprin1	4987.94	0.716492	0.0674046	10.6297	2.16739e-26	2.38387e-25	3727.36	7233.43	3582.53	6323.81	3478.65	5561.86	6868.88	3274.37	5906.73	3685.84	5870.31	4502.94	3490.95	6560.21	3927.74	5882.36	4229.13	6012.28	3822.08	5817.42
1727	Spint2	20.2932	3.46815	0.326309	10.6284	2.19742e-26	2.41551e-25	3.50602	17.8666	3.05882	53.6605	4.47922	49.8197	43.3048	2.50386	27.6688	2.91108	49.6934	6.31317	0	24.1234	1.23283	31.5918	3.26633	40.0333	2.15357	38.6763
1728	Rrm2	506.169	-4.43077	0.417023	-10.6248	2.2861e-26	2.51153e-25	277.58	17.0609	585.295	14.5395	1537.3	68.6895	30.7641	455.668	21.383	1426.28	59.7436	1649.46	467.54	38.5886	679.324	19.4094	1567.67	116.153	1029.8	61.1214
1729	H2-M3	712.011	1.30587	0.122919	10.6238	2.31013e-26	2.53646e-25	477.627	1012.5	349.481	1255	290.338	649.236	1092.82	420.274	1004.07	417.324	910.86	350.646	448.887	1121.8	547.722	877.381	407.049	918.813	397.032	1291.35
1730	Gsg2	71.6824	-2.47944	0.233463	-10.6203	2.39902e-26	2.63254e-25	97.099	17.3933	86.7769	29.7114	141.047	25.3054	19.2061	77.0947	20.9489	177.937	7.58554	173.412	61.2985	21.6287	114.613	19.7983	161.526	32.0669	132.916	16.2825
1731	Mmp8	45.7365	3.1903	0.300401	10.6201	2.40224e-26	2.63455e-25	2.62071	69.6568	10.847	50.5078	9.95322	122.135	104.846	17.0969	91.1999	4.73711	83.7117	15.8907	2.55249	125.929	4.82903	68.8349	6.44138	41.808	10.5547	70.5768
1732	Cdca2	146.902	-3.42401	0.322521	-10.6164	2.50043e-26	2.74065e-25	107.211	0	183.437	23.8226	346.721	67.292	24.3359	251.322	15.5567	387.269	7.37535	343.56	173.098	10.7996	189.399	56.1282	376.54	20.1567	329.82	24.1948
1733	Tgtp1	25.5691	4.77979	0.45023	10.6163	2.50213e-26	2.74094e-25	0	63.9217	0	47.1028	3.6451	104.345	66.1539	1.28616	32.1586	0	27.491	0.964905	5.0495	52.7907	8.54578	30.6888	2.54791	21.7719	0	42.9197
1734	Zmat3	439.326	-0.972485	0.0916058	-10.616	2.51168e-26	2.74981e-25	527.902	381.449	563.414	253.756	667.474	308.002	340.014	633.603	305.543	513.997	333.335	512.526	558.098	253.52	551.466	286.9	689.669	300.763	581.614	223.48
1735	Ptpn22	150.651	-2.63893	0.2486	-10.6152	2.53387e-26	2.7725e-25	185.285	13.8729	264.105	22.509	300.799	47.2423	42.3117	228.526	20.275	302.278	52.9561	354.191	199.092	15.2186	209.039	64.2202	274.021	72.2396	260.166	84.6744
1736	Ccl9	43105.3	3.16962	0.298916	10.6037	2.86354e-26	3.13142e-25	5850.09	68454	5655.71	80815.6	15270.3	108332	70004.2	5779.49	76399.6	6237.86	59848.3	21573.1	7565.36	87309.4	6909.28	75909.4	6037.54	60610.4	5343.73	88201
1737	RP23-293I7.1	34.6933	-2.12118	0.200089	-10.6011	2.94357e-26	3.21708e-25	55.2277	4.41239	64.0669	12.0568	48.7388	19.8683	13.0622	49.0855	9.79754	54.6272	7.97105	59.1183	69.5247	15.0804	66.3631	13.8255	52.3844	11.7536	47.7463	19.1557
1738	Plcg1	69.8558	-2.57799	0.243258	-10.5978	3.05163e-26	3.33327e-25	145.538	22.9845	87.4068	11.4573	127.356	46.4865	14.3167	149.851	24.0488	96.7719	0	100.724	151.522	8.93618	106.244	22.0421	133.899	32.0023	104.259	11.2707
1739	Mrpl28	653.596	-1.0404	0.0981893	-10.5959	3.11354e-26	3.39893e-25	837.099	300.449	777.743	427.198	889.694	369.902	454.018	748.672	401.209	1035.13	360.32	1025.91	993.759	440.614	750.094	470.269	816.934	530.357	945.643	496.906
1740	Abcc3	564.558	-1.05544	0.0996394	-10.5926	3.22408e-26	3.51758e-25	697.234	309.051	786.854	390.452	680.451	410.228	340.463	784.597	252.207	794.809	392.588	721.994	976.748	397.205	632.792	390.325	827.211	378.133	716.706	411.11
1741	Amacr	31.0311	-2.93637	0.277225	-10.592	3.24612e-26	3.5396e-25	84.7867	8.70255	48.2091	5.94218	43.6894	5.31772	5.90802	46.3835	3.49221	63.4496	18.9986	42.5432	49.7872	6.36063	56.7247	6.25527	49.3922	11.6645	54.8713	8.1425
1742	Pyroxd2	65.7566	-2.36083	0.222901	-10.5914	3.26733e-26	3.56067e-25	156.713	39.1065	143.424	20.7983	75.2393	21.3517	11.8224	99.9608	23.2714	82.293	30.2829	102.687	139.252	24.1763	132.656	14.5803	64.024	26.2275	99.1259	8.13986
1743	Cep120	204.682	-1.24185	0.117262	-10.5904	3.3034e-26	3.59791e-25	307.118	91.0669	294.082	111.425	258.489	116.729	100.567	302.737	106.208	282.352	109.19	235.325	314.605	124.742	233.698	151.824	358.59	164.009	303.424	127.465
1744	Creb3l1	59.9536	-2.81887	0.266201	-10.5892	3.34279e-26	3.63873e-25	80.4238	4.35092	69.9033	10.3988	141.579	18.6162	7.38525	62.4909	22.1168	127.837	22.7932	184.178	90.6422	11.4493	108.617	23.9771	100.505	14.58	91.8004	5.42823
1745	Psmb2	2403.68	0.714311	0.0674641	10.588	3.38719e-26	3.68495e-25	1636	3099.26	1671.24	3052.28	1974.98	2671.76	2961.99	1535.9	2969.64	1981.09	2698.43	2132.3	1752.76	3164.21	1926.43	3370.18	1785.72	2765.26	1808.14	3116.09
1746	Klf3	297.571	1.40841	0.133038	10.5865	3.44226e-26	3.74272e-25	208.76	535.196	201.696	464.171	134.324	545.655	376.816	208.501	498.288	111.448	367.945	139.862	170.071	426.515	160.105	302.485	148.155	446.962	143.95	360.512
1747	Pex16	320.903	0.813546	0.0768682	10.5836	3.54863e-26	3.85617e-25	243.667	349.588	208.264	430.838	266.248	405.638	398.095	211.427	389.956	226.262	412.455	262.556	244.541	414.437	243.405	404.194	193.679	412.856	231.032	468.915
1748	Msantd3	22.8121	3.63736	0.343712	10.5826	3.58945e-26	3.89829e-25	2.27617	69.3951	1.5923	41.7054	4.36972	9.90017	47.1728	1.95889	48.7715	4.797	38.637	4.97521	1.67526	34.1579	7.3045	49.2178	2.52067	46.5238	1.0636	38.228
1749	Tmem11	533.101	1.03137	0.097462	10.5822	3.60272e-26	3.91046e-25	395.825	674.795	311.157	742.676	316.359	517.147	666.099	305.35	764.118	364.812	603.942	348.674	423.045	891.41	347.685	795.616	373.143	650.501	326.261	843.407
1750	Cfh	1474.13	-1.20536	0.113995	-10.5738	3.94128e-26	4.2755e-25	2246.23	769.945	2158.97	829.857	1914.67	1089.29	1125.25	2140.9	702.834	1586.16	771.147	2393.9	2284.46	927.326	1481.98	778.757	2092.62	1141.63	2278.2	768.552
1751	Pgk1	5164.42	1.06557	0.100781	10.5732	3.9673e-26	4.30127e-25	2682	7400.5	2925.55	6222.78	2824.16	5879.55	6727.36	2647.97	7808.64	4357.82	7648.48	4128.25	2964.99	7048.25	3366.65	7454.27	4143.07	6889.38	3347.06	6821.67
1752	Dnajc2	432.005	1.23086	0.116415	10.573	3.97618e-26	4.30843e-25	236.541	561.968	239.906	713.654	268.759	618.026	714.849	204.835	625.563	266.975	383.408	355.997	233.096	627.135	270.994	611.332	300.53	672.018	206.523	527.995
1753	Iqsec2	190.488	1.67854	0.158793	10.5707	4.07632e-26	4.41442e-25	103.584	302.465	82.0579	358.876	95.0429	199.368	283.197	66.1961	347.64	118.726	173.621	70.5672	86.601	378.869	120.547	252.693	65.1495	247.178	108.408	348.975
1754	D8Ertd82e	779.299	1.89375	0.179158	10.5702	4.09483e-26	4.43194e-25	279.339	1448.71	181.448	1109.44	303.729	1093.73	1170.82	222.711	1303.8	532.108	1237.82	587.064	271.11	1350.14	245.623	1088.64	421.741	995.998	251.958	1490.06
1755	Klhl21	230.931	-1.70116	0.160945	-10.5698	4.11478e-26	4.451e-25	502.45	130.174	355.549	93.5955	235.759	58.9386	102.023	388.129	105.452	373.195	135.766	229.378	453.859	118.365	330.18	100.915	296.189	139.788	360.417	108.496
1756	Gnb1	5005.44	0.715475	0.0676979	10.5687	4.16446e-26	4.50217e-25	4203.16	7013.09	3816.3	6195.27	3777.16	5757.25	6375.23	3394.86	6543.45	3388.23	5776.49	3836.39	3594.82	7297.92	4199.82	6528.4	3908.41	5337.84	3773.12	5391.55
1757	Slc35a1	150.285	-1.27765	0.120896	-10.5681	4.18697e-26	4.52393e-25	240.136	89.8042	196.033	49.5573	204.462	100.929	117.723	231.328	79.5711	214.985	75.2172	223.644	208.48	82.6711	187.103	99.419	224.689	112.627	199.187	68.1382
1758	Eml2	304.133	1.21542	0.115051	10.5642	4.3683e-26	4.71717e-25	180.021	420.065	173.025	421.825	154.363	345.435	289.021	153.597	440.872	216.94	452.577	144.672	207.152	494.734	165.786	434.36	202.465	447.884	238.297	499.566
1759	Galk2	1127.18	-0.821026	0.0777264	-10.563	4.42171e-26	4.77212e-25	1609.48	599.371	1462.46	784.085	1226.1	799.243	915.762	1473.52	731.95	1362.5	887.411	1346.22	1686.51	848.011	1455.66	830.947	1280.26	917.484	1514.75	811.848
[truncated: 28,199 more rows]

## Sheet: CX5641 in vitro Microglia
	Gene	Log2 FC	baseMean	log2FoldChange	lfcSE	stat	pvalue	padj	LPSCTL	LPS CTL	LPS CTL	LPS CX5461	LPS CX5461	LPS CX5461
[truncated: 29,958 more rows]

[truncated: 1 more sheets: TGFB1 in vitro Microglia]
