# Supplementary material for: Microglia aging in the hippocampus advances through intermediate states that drive activation and cognitive decline
Source: eLife. 2025 Apr 29;13:RP97671. doi: 10.7554/eLife.97671 (PMC12040317; doi:10.7554/eLife.97671)
Supplement: Supplementary file 4. — The table contains expression values of genes for the samples that were compared along with mean expression values for all samples combined, log fold change between sample groups, and adjusted p-values. [file elife-97671-supp4.xlsx]

## Sheet: TableS4
	Gene	baseMean	log2FoldChange	lfcSE	stat	pvalue	padj	Het 1	Het 2	Het 3	Het 4	Het 5	cKO 1	cKO 2	cKO3
1	Axl	8414.45	4.77227	0.177127	26.9426	6.97e-160	1.04e-155	1095.99	690.769	700.911	658.681	734.801	23032.4	19900.7	20501.3
2	Msr1	1959.38	5.65293	0.222585	25.3967	2.74e-142	2.05e-138	117.705	95.6943	59.316	98.3208	132.482	5448.98	4221.88	5500.66
3	Gpr65	2132.34	4.78115	0.189563	25.222	2.3e-140	1.15e-136	215.45	205.946	133.18	187.354	233.181	6210.73	5165.97	4706.88
4	H2-Ab1	26059.9	5.84926	0.237863	24.5908	1.58e-133	5.93e-130	1351.39	865.485	764.11	1708.34	1172.42	71221.3	52043.2	79352.7
5	Sdc4	4884.39	4.24221	0.176387	24.0506	8.24e-128	2.47e-124	742.549	538.308	621.91	603.971	657.037	11042.3	9574.43	15294.7
6	Iqgap1	1679.18	4.06877	0.170324	23.8885	4.04e-126	1.01e-122	314.658	231.661	199.623	215.609	255.721	4305.04	3709.12	4202.04
7	Ifitm2	1584.2	5.79304	0.246783	23.4742	7.48e-122	1.6e-118	79.0396	78.8406	33.0429	92.8588	86.1788	4292.93	3502.97	4507.71
8	Mgl2	1503.05	5.61251	0.239264	23.4574	1.11e-121	2.08e-118	96.6766	53.5069	79.8078	53.5583	113.676	4237.11	3714.02	3676.08
9	Slco4a1	2060.4	-3.5654	0.15267	-23.3536	1.27e-120	2.11e-117	3494.39	3247.29	3292.79	2964.21	2694.07	263.571	274.124	252.792
10	Cd74	39577	5.70534	0.250164	22.8064	3.96e-115	5.93e-112	1985.52	1378.68	1228.05	3081.71	2129.35	110500	82764.4	113549
11	Csmd3	3177.17	-3.13595	0.141311	-22.1917	4.13e-109	5.62e-106	5176.71	4613.53	4996.21	4393.29	4614.29	479.335	610.327	533.651
12	Dab2	11200.5	4.91196	0.22311	22.0159	2.03e-107	2.53e-104	1311.95	897.114	692.032	620.068	1182.37	29091.6	26781.6	29027.4
13	AI607873	1743.74	5.26776	0.240721	21.8833	3.75e-106	4.32e-103	138.758	139.092	67.539	81.4931	149.635	4487.02	3902.44	4983.94
14	Pla2g7	1405.14	4.78666	0.219468	21.8103	1.85e-105	1.98e-102	149.116	135.266	69.1725	126.376	157.558	3301.62	3945	3357.04
15	Clec4a1	2065.74	4.471	0.205326	21.7751	3.99e-105	3.99e-102	236.416	267.013	186.916	158.974	302.297	5744.08	4585.07	5045.15
16	Igf1	1139.78	4.96751	0.230579	21.5436	6.08e-103	5.69e-100	82.9543	67.3399	104.631	72.0787	132.389	3338.97	2399.87	2920.02
17	Ecscr	3857.66	-3.29035	0.153387	-21.4512	4.45e-102	3.92e-99	5496.83	6377.78	5895.07	5462.5	5839.86	689.43	476.329	623.439
18	Cd72	1403.13	4.52682	0.212845	21.2681	2.24e-100	1.86e-97	200.384	125.147	103.745	158.362	172.528	3622.97	2914.76	3927.12
19	Ccl24	1978.81	5.24115	0.246747	21.241	4e-100	3.15e-97	91.5351	155.091	90.3165	133.313	192.536	4896.43	3961.28	6310
20	Mrc1	16498.7	5.42697	0.256358	21.1695	1.83e-99	1.37e-96	1214.95	1138.61	673.936	522.154	1371.38	44850.7	41005.5	41212.5
21	Cd38	939.836	4.7372	0.22553	21.0048	5.93e-98	4.23e-95	50.6057	98.8159	83.8533	85.7847	116.838	2337.65	2021.96	2723.19
22	Mlph	2590.55	-3.55774	0.170502	-20.8663	1.08e-96	7.38e-94	4325.91	4017.33	3940.08	3537.64	3919.28	417.176	319.04	247.919
23	Myo5a	2665.04	4.07493	0.199038	20.4731	3.74e-93	2.44e-90	542.948	405.299	271.09	346.317	355.217	6507.98	6862.74	6028.71
24	Sgk1	7117.09	-2.72334	0.133056	-20.4677	4.18e-93	2.61e-90	10866.4	11454	9292.22	10964.8	9603.44	1613	1433.63	1709.16
25	Ifitm3	1976.48	4.60904	0.226843	20.3182	8.87e-92	5.32e-89	173.936	273.045	163.376	136.092	258.701	5522.27	4178.18	5106.25
26	Cd300ld	2339.98	5.45614	0.270583	20.1644	2.01e-90	1.16e-87	196.991	71.6924	116.352	110.916	191.687	6174.33	4957.49	6900.36
27	Dnase1l3	786.035	4.43086	0.220038	20.1368	3.52e-90	1.95e-87	83.7716	61.7342	76.115	122.154	108.902	1935.05	2028.35	1872.2
28	Lhfpl2	5312	-3.34866	0.166602	-20.0998	7.41e-90	3.97e-87	8869.83	7693.24	7948.07	7516.83	8073.84	625.739	732.506	1035.98
29	Cd93	913.617	4.88311	0.249703	19.5557	3.69e-85	1.91e-82	42.6611	88.9812	78.7053	66.5933	107.72	2407.5	1780.62	2736.16
30	AB124611	770.203	4.97184	0.254371	19.5456	4.5e-85	2.24e-82	108.559	46.4363	45.2791	52.0566	62.9814	2130.48	1826.08	1889.74
31	Lyz2	41232.8	3.62757	0.185872	19.5165	7.95e-85	3.84e-82	7993.67	8284.03	5214.68	8258.37	9442.81	105298	81156.3	104214
32	Dse	2555.11	2.95266	0.153651	19.2167	2.68e-82	1.26e-79	675.557	857.009	599.612	757.714	730.638	6178.24	5581.18	5060.91
33	Gas7	1148.78	4.4814	0.236758	18.9282	6.68e-80	3.03e-77	106.794	146.404	183.832	88.7795	117.828	2763.64	2198.67	3584.3
34	Golm1	22480	-2.77175	0.147178	-18.8327	4.08e-79	1.8e-76	39040.8	34206.8	30498.4	28991.2	32579	5507.55	4178.08	4838.28
35	Ccl12	5047.77	4.1538	0.220827	18.8102	6.23e-79	2.67e-76	464.088	764.39	787.392	518.872	917.073	14975.7	10724.1	11230.5
36	Adam19	1230	5.14822	0.277549	18.5489	8.33e-77	3.47e-74	109.867	40.9348	77.9669	88.8083	128.823	2894.27	3197.33	3302.01
37	Cybb	5898.79	5.57373	0.302685	18.4143	1.01e-75	4.08e-73	394.251	326.883	125.827	242.356	507.472	17180.3	13187.4	15225.8
38	Ifi204	1253.25	3.19137	0.175281	18.2072	4.52e-74	1.78e-71	315.173	353.99	252.852	262.542	359.041	3142.81	2509.35	2830.22
39	Hs3st1	314.633	6.16863	0.341915	18.0414	9.21e-73	3.54e-70	16.5462	4.00035	16.8711	7.39329	14.8574	845.531	858.562	753.306
40	Thrsp	939.189	-3.12061	0.173798	-17.9554	4.35e-72	1.63e-69	1382.17	1641.33	1325.73	1342.66	1324.57	158.166	146.66	192.222
41	Lilra5	1908.65	2.9828	0.168939	17.6561	9.13e-70	3.34e-67	614.477	453.17	493.531	480.795	617.707	4662.13	3528.34	4419.01
42	Ms4a6c	2442.34	2.99704	0.170928	17.534	7.88e-69	2.81e-66	504.792	805.357	670.538	735.155	651.811	5610.64	4669.82	5890.63
43	Plxdc2	17878.7	-2.36788	0.13613	-17.3943	9.12e-68	3.18e-65	28958.8	23245.2	24348.6	27726.4	23846.9	5252.61	4341.89	5309.35
44	Nav3	4723.95	-2.69821	0.156986	-17.1876	3.29e-66	1.12e-63	7346.41	7432.5	6826.9	6241.35	6708.89	843.258	1100.64	1291.65
45	F11r	14317.5	-2.40555	0.140049	-17.1766	3.98e-66	1.3e-63	21005.6	21807.2	19598	18638.8	21830.7	4375.2	3198.57	4086.13
46	P2ry12	49598.2	-3.05334	0.17776	-17.1767	3.97e-66	1.3e-63	72012	76926.6	76104.2	64926.3	80044.1	9284.36	6249.43	11238.5
47	Slc14a1	634.42	3.84549	0.223909	17.1744	4.13e-66	1.32e-63	93.484	116.648	84.7733	153.321	79.7438	1486.29	1592.56	1468.55
48	Arhgap19	2127.57	3.34749	0.195607	17.1133	1.18e-65	3.68e-63	566.403	507.714	320.618	424.419	575.833	5367.4	4438.65	4819.52
49	Ifi203	492.771	3.50752	0.205412	17.0755	2.26e-65	6.9e-63	85.7811	94.8944	130.591	99.6852	93.3023	1073.82	1347.74	1016.36
50	Fcgr4	1365.62	3.16274	0.186957	16.917	3.37e-64	1.01e-61	370.035	273.756	314.566	343.63	411.094	3201.36	2427.14	3583.35
51	Blvrb	1965.22	2.82438	0.168575	16.7544	5.26e-63	1.54e-60	469.023	672.521	544.007	740.186	567.019	4488.79	4037.18	4203.01
52	Cd34	5210.65	-3.11105	0.186931	-16.6428	3.41e-62	9.83e-60	9013.88	7920.41	6633.93	7677.73	7753.88	805.191	1202.33	677.883
53	Tmem8c	333.145	-4.57923	0.276734	-16.5474	1.67e-61	4.72e-59	481.051	482.201	540.344	519.516	576.014	25.2477	17.839	22.9435
54	Upk1b	2835.59	-3.26025	0.197315	-16.5231	2.5e-61	6.94e-59	4453.69	4238.3	4196.37	3578.93	4878.34	571.6	309.539	457.955
55	Gprc5c	437.78	3.63692	0.221723	16.403	1.82e-60	4.96e-58	98.2335	85.0413	73.1728	74.5706	85.6394	1324.55	948.998	812.032
56	Selplg	85305	-2.56711	0.156712	-16.3811	2.61e-60	6.98e-58	138413	137117	116736	99875.1	127559	24434.8	17700.4	20604.5
57	Gm10307	548.254	3.58974	0.221265	16.2237	3.43e-59	9.01e-57	131.467	88.6505	80.9663	109.731	126.358	1506.83	1302.55	1039.48
58	S1pr2	1181.1	2.48935	0.154116	16.1524	1.09e-58	2.82e-56	493.247	375.468	441.616	386.696	470.755	2553.49	2497.01	2230.55
59	Gal3st4	8232.97	-2.63057	0.163901	-16.0498	5.74e-58	1.46e-55	12316.2	12300	10938.5	10411.4	14078.2	2309.67	1552.9	1956.85
60	Ccl7	576.095	5.16214	0.322463	16.0085	1.12e-57	2.78e-55	50.1743	25.6651	75.0859	27.6785	28.0424	1345.46	1192.45	1864.21
61	Cfp	1126.14	4.46377	0.281259	15.8707	1.01e-56	2.48e-54	109.86	112.47	72.2292	106.748	228.973	2866.33	2643.88	2868.67
62	Itga4	1296.56	3.05325	0.192477	15.8629	1.15e-56	2.77e-54	312.474	292.798	462.235	349.104	322.272	3358.65	2930.22	2344.75
63	Vav3	231.151	4.37053	0.275613	15.8575	1.25e-56	2.97e-54	35.6523	18.3436	34.8545	23.4496	28.5194	567.971	601.121	539.296
64	Sdc3	2268.39	3.28378	0.207245	15.845	1.52e-56	3.56e-54	709.139	469.713	343.195	567.865	567.098	5639.64	4612.13	5238.37
65	Oas2	531.752	4.52343	0.286433	15.7923	3.52e-56	8.11e-54	61.3842	90.2581	33.7866	46.6142	53.6156	1723.77	1113.96	1130.63
66	Serpine2	10583.3	-2.42206	0.153523	-15.7765	4.51e-56	1.02e-53	16065.2	15889	15749.9	13191.6	15214.1	2520.44	2483.1	3552.99
67	5430435G22Rik	626.55	4.73205	0.300324	15.7564	6.2e-56	1.39e-53	70.5763	59.6393	39.5129	77.8686	49.3532	1346.48	948.642	2420.33
68	Jam2	2009.28	-2.56885	0.163147	-15.7456	7.36e-56	1.62e-53	2539.32	3058.23	3292	2903.58	2786.75	403.269	526.846	564.217
69	Ehd1	745.021	4.86684	0.312632	15.5673	1.21e-54	2.63e-52	53.1501	79.7324	32.989	77.4452	80.9842	1792.27	1140.42	2703.17
70	Anxa5	2648.32	2.9968	0.194512	15.4068	1.47e-53	3.15e-51	817.28	742.616	533.497	588.575	976.142	6044.12	5574.14	5910.14
71	Sparc	27458.6	-2.55511	0.167562	-15.2488	1.68e-52	3.54e-50	41152.7	42909.5	37292.3	37004.9	40930	7039.56	4938.01	8401.56
72	Cxcl16	4971.88	2.71324	0.17817	15.2284	2.29e-52	4.76e-50	1681.65	1801.56	1376.46	1448.51	1743.71	8730.84	9227.38	13764.9
73	Clec7a	878.884	2.89604	0.190913	15.1694	5.64e-52	1.16e-49	268.912	274.466	298.669	218.167	224.795	2133.11	1475.94	2137.02
74	Spint1	2593.81	-2.77912	0.184136	-15.0928	1.81e-51	3.66e-49	4544.58	3906.42	3564.68	3578.23	3512.01	683.091	575.059	386.406
75	Gpr34	40921.1	-1.89413	0.125608	-15.0797	2.2e-51	4.4e-49	50555.5	58336.3	56440.9	56227.7	60295.3	16139.2	13187.6	16186.1
76	Epor	839.618	3.83943	0.254979	15.0578	3.07e-51	6.03e-49	205.998	167.434	77.5118	137.566	115.384	2109.58	2088.26	1815.22
77	Tgfbr1	29262.3	-1.79924	0.119494	-15.0571	3.1e-51	6.03e-49	44306.8	41636.2	39269.3	36499.4	37979.8	11994.4	11803.9	10608.1
78	Usp2	3819.47	-2.25893	0.150072	-15.0523	3.34e-51	6.41e-49	5571.12	5494.14	5395.3	5638.09	5027.94	1111.14	925.189	1392.87
79	Cd163	952.789	3.76584	0.251923	14.9484	1.6e-50	3.03e-48	153.398	183.51	99.4433	224.264	171.95	3019.39	1833.2	1937.15
80	Nbeal2	1054.88	-3.22866	0.216646	-14.9029	3.16e-50	5.91e-48	1797.5	1572.25	1837.92	1409.99	1309.21	208.576	120.297	183.313
81	Tlr8	411.09	5.25609	0.355944	14.7666	2.4e-49	4.45e-47	22.0361	34.4	11.9979	62.0738	18.1921	1112.19	980.085	1047.74
82	Tgm2	1856.91	-3.14706	0.213369	-14.7494	3.11e-49	5.67e-47	3813.96	2661.17	2216.87	2228.57	3001.65	294.669	375.318	263.043
83	Itsn1	803.789	3.39988	0.234424	14.5031	1.16e-47	2.09e-45	141.673	130.371	247.369	136.943	221.411	1889.78	1938.73	1724.03
84	Tmem119	78023.5	-2.93179	0.202583	-14.4721	1.82e-47	3.24e-45	137796	123367	109382	88626.5	119522	20631.6	11071	13793.2
85	Ppap2a	976.644	-2.73864	0.189681	-14.4381	2.98e-47	5.25e-45	1417.85	1286.33	1454.93	1348.64	1647.49	162.577	234.445	260.884
86	Tmem44	1084.29	-2.27451	0.159156	-14.291	2.49e-46	4.33e-44	1570.05	1477.73	1749.35	1547.78	1368.87	292.543	338.152	329.811
87	Ivns1abp	44619.1	-1.79011	0.125366	-14.2791	2.95e-46	5.09e-44	63730.6	63010.9	57253.7	56531.5	63675.4	19852.8	17322.7	15575.6
88	Slc1a3	3654.96	-2.3751	0.166866	-14.2336	5.67e-46	9.65e-44	5313.17	5887.25	4462.67	5588.31	4929.88	856.168	921.727	1280.48
89	Sall1	7599.24	-2.10853	0.148729	-14.177	1.27e-45	2.14e-43	11328.8	11376.4	9447.99	10560	10650.6	2872.06	1996.03	2562.01
90	Ms4a6b	6417.2	1.84585	0.130248	14.1719	1.37e-45	2.28e-43	3490.91	3207.84	3176.72	3094	3293.34	13195.5	10014.5	11864.8
91	Marcksl1	863.94	2.50001	0.176659	14.1516	1.83e-45	3.01e-43	337.413	356.166	256.931	324.822	293.386	1637.96	1597.03	2107.82
92	Tlr3	849.053	-2.31473	0.16375	-14.1357	2.29e-45	3.72e-43	1339.05	1112.23	1251.75	1252.77	1097.34	246.104	222.033	271.157
93	Asap3	934.578	-3.27722	0.231863	-14.1343	2.34e-45	3.76e-43	1712.11	1352.05	1281.48	1132.32	1582.55	180.052	156.333	79.7209
94	Plin2	1762.34	2.33529	0.1666	14.0174	1.22e-44	1.95e-42	809.456	672.061	570.703	647.78	800.589	3771.2	3029.64	3797.32
95	Ano7	518.255	-2.88285	0.206233	-13.9786	2.11e-44	3.32e-42	857.574	866.855	687.056	770.648	655.457	94.3318	121.292	92.8266
96	Rnf150	674.702	2.39763	0.171654	13.9678	2.45e-44	3.82e-42	278.715	218.611	265.78	230.357	303.779	1294.03	1416.62	1389.73
97	Egfl7	299.872	4.62263	0.331914	13.9272	4.33e-44	6.69e-42	33.5283	16.332	21.5608	26.4585	53.3246	830.766	617.377	799.633
98	Wwp1	1569.77	2.51072	0.180576	13.904	5.99e-44	9.16e-42	742.635	618.862	447.815	519.842	513.19	3220.3	2995.86	3499.65
99	Gpr56	17410.5	-2.66426	0.191811	-13.89	7.28e-44	1.1e-41	31665.3	28768.5	24015.9	19110	23680	4892.94	3118.22	4032.86
100	Fam65b	723.177	2.15863	0.156001	13.8373	1.52e-43	2.27e-41	342.012	316.561	299.977	343.099	276.181	1432.02	1478.73	1296.84
101	Tmem100	1156.77	-2.76745	0.200082	-13.8316	1.64e-43	2.44e-41	1873.95	1811.86	1561.02	1596.48	1651.86	298.978	171.109	288.911
102	Dok2	604.137	4.87122	0.352315	13.8263	1.77e-43	2.6e-41	60.8227	18.4825	45.6633	46.9784	90.0648	1719.01	1221.14	1630.94
103	Cp	852.675	3.59463	0.260013	13.8248	1.81e-43	2.63e-41	110.337	228.578	193.589	198.672	98.4875	2124.39	1944.81	1922.54
104	H2-Aa	19440.6	5.70423	0.413445	13.7968	2.66e-43	3.84e-41	892.931	577.552	775.489	1728.76	844.387	51455.4	39787.6	59462.7
105	Slamf7	394.111	4.93102	0.362087	13.6183	3.12e-42	4.44e-40	46.4403	10.4493	30.8157	38.9358	40.2515	1014.02	749.308	1222.66
106	Atp8a2	4085.49	-1.85512	0.136474	-13.5932	4.39e-42	6.21e-40	6191.39	6036.1	5275.67	4849.66	5669.21	1481.9	1478.03	1701.97
107	Asgr2	183.91	4.42253	0.326501	13.5452	8.46e-42	1.18e-39	8.53189	24.4663	29.9883	18.8872	22.5754	551.959	399.323	415.547
108	Ctsd	268994	-1.78897	0.132594	-13.4921	1.74e-41	2.41e-39	379966	392231	340175	326145	395058	111432	91704.5	115240
109	Il1b	276.538	4.83807	0.359391	13.4619	2.62e-41	3.6e-39	38.4832	15.2625	16.1698	17.6607	36.2336	777.77	889.104	421.622
110	Gtf2h2	2865.35	-1.92668	0.144064	-13.3738	8.61e-41	1.17e-38	3562.21	3844.03	3885.71	4109.95	4415.92	1168.81	1059.5	876.685
111	Cd22	1287.83	2.24099	0.167672	13.3653	9.64e-41	1.3e-38	621.378	593.381	444.192	475.367	556.756	2803.85	2600.61	2207.14
112	Stab1	35555	1.91018	0.142951	13.3625	1e-40	1.34e-38	17051.5	18307.6	14266.7	20511.7	17249.4	72348.4	62649.3	62055.6
113	Gdpd1	562.582	2.14227	0.160596	13.3395	1.36e-40	1.81e-38	255.459	261.847	227.051	248.12	242.009	1201.17	1005.23	1059.77
114	Ctsc	28472	1.91294	0.143734	13.3089	2.05e-40	2.7e-38	14886.5	15577.7	11664.3	12003.3	15748.7	53923.1	51349.2	52623.5
115	Tmem106a	2504.36	2.74559	0.206887	13.271	3.41e-40	4.44e-38	821.701	749.543	549.382	788.301	1076.14	5549.68	4313.68	6186.48
116	Frmd4a	9839.48	-1.69689	0.128135	-13.243	4.95e-40	6.4e-38	12829	13804.6	11724.6	14057.8	14000.6	4426.42	3646.79	4226
117	Sema4a	1121.48	3.18524	0.241916	13.1667	1.36e-39	1.75e-37	406.422	291.353	159.642	247.153	290.641	2858.75	2247.15	2470.76
118	Fcgr2b	18974.9	1.67239	0.127187	13.149	1.72e-39	2.19e-37	10078.4	11185.5	9777.42	9440.65	11628.1	32463.3	30868.8	36356.8
119	Scimp	503.765	3.3966	0.259575	13.0852	4e-39	5.04e-37	174.637	94.924	88.9474	121.722	76.1026	1340.8	1062.5	1070.48
120	Klhdc8b	1102.45	-2.32401	0.178547	-13.0163	9.89e-39	1.23e-36	1590.17	1714.33	1619.29	1224.31	1725.48	280.85	343.131	322.027
121	Fam118a	617.538	2.93319	0.225852	12.9872	1.45e-38	1.79e-36	200.956	183.049	131.347	195.943	170.837	1036.31	1213.96	1807.9
122	Slfn2	1694.84	2.44331	0.188452	12.9652	1.93e-38	2.37e-36	732.085	764.993	595.402	560.806	524.813	3787.84	2686.17	3906.58
123	Col6a3	511.066	-3.22409	0.249417	-12.9265	3.19e-38	3.88e-36	781.196	839.604	723.826	716.875	753.746	92.2857	55.6211	125.372
124	Fam102b	1956.43	-1.91603	0.148693	-12.8858	5.41e-38	6.54e-36	2711.57	2596.3	2352.51	3073.49	2775.48	800.175	656.806	685.108
125	Ifi47	221.839	3.85118	0.299208	12.8713	6.53e-38	7.83e-36	62.213	36.2875	28.2401	26.0244	34.0176	472.647	638.279	477.005
126	Apoe	489652	6.11298	0.475112	12.8664	6.96e-38	8.27e-36	27645.9	12475.6	8021.22	13460.9	30505.9	1.4244e+06	1.06294e+06	1.33776e+06
127	Apobec1	2925.96	2.13503	0.166327	12.8363	1.03e-37	1.21e-35	1348.24	1298.64	1228.1	1119.07	1434.89	5749.7	4397.2	6831.82
128	Cd63	7387.68	1.68697	0.131531	12.8256	1.18e-37	1.38e-35	3804.78	4101.05	3522.63	4420.3	4301.14	12347.3	12206.3	14398
129	Pf4	5885.09	5.65577	0.441668	12.8055	1.53e-37	1.77e-35	285.52	289.06	111.34	289.825	529.823	13473.7	13307.6	18793.9
130	Eng	4271.19	-1.94442	0.152531	-12.7477	3.21e-37	3.7e-35	6640.41	5861.41	6221.43	4780.9	6059.34	1747.23	1359.5	1499.3
131	Lgals3	426.872	4.62479	0.363477	12.7237	4.36e-37	4.99e-35	19.6316	31.9715	55.3455	25.7909	79.9492	1090.86	773.854	1337.57
132	Lgals1	384.142	4.57889	0.359986	12.7196	4.6e-37	5.22e-35	23.7662	40.9552	19.4047	73.8154	41.4291	907.655	643.165	1322.95
133	Tmem176a	5966.21	1.83304	0.145075	12.6352	1.35e-36	1.52e-34	2830.48	3519.66	2479.87	3311.9	3065.76	11242.5	10101.8	11177.8
134	Sp100	884.877	2.27623	0.180652	12.6001	2.11e-36	2.36e-34	394.3	394.054	285.933	397.362	341.434	1993.2	1467.91	1804.83
135	Paox	2054.37	2.61816	0.207952	12.5902	2.39e-36	2.65e-34	805.748	642.829	436.219	837.819	789.809	4882.05	4056.62	3983.85
136	Arhgap5	3784.54	-1.84075	0.146334	-12.5791	2.75e-36	3.03e-34	6096.14	4938.29	4956.26	4745.57	5198.51	1644.24	1270.62	1426.69
137	Myo18b	369.738	-3.22806	0.256836	-12.5685	3.14e-36	3.44e-34	559.015	706.094	425.975	488.117	599.925	50.674	64.9943	63.1107
138	Gas6	14704.6	2.11452	0.168972	12.514	6.26e-36	6.79e-34	8882.28	6131.2	5793.03	5875.62	6015.99	31280.9	25465	28192.6
139	Bbs9	1245.26	-2.10308	0.168545	-12.4778	9.86e-36	1.06e-33	1947.93	1775.62	1630.54	1509.12	1894.22	439.784	445.686	319.161
140	Ms4a7	5931.4	6.11178	0.490565	12.4587	1.25e-35	1.34e-33	217.774	140.001	136.483	143.047	480.248	16072.8	13221.7	17039.1
141	Fam46c	2767.34	-2.24826	0.18085	-12.4316	1.76e-35	1.87e-33	4864.12	4116.93	3685.81	3688.22	3280.72	722.055	732.643	1048.18
142	Ifi27l2a	551.61	3.26756	0.263156	12.4168	2.12e-35	2.23e-33	113.031	194.588	120.719	126.703	93.5163	1535.82	890.862	1337.64
143	Bin2	13732.3	-1.98939	0.160499	-12.395	2.78e-35	2.91e-33	22919.9	20076.6	15826.8	17094.7	19521.7	5584.96	4132.25	4701.28
144	H2-K1	15083.5	1.95926	0.158508	12.3607	4.27e-35	4.44e-33	7842.87	8391.95	6691.55	5627.73	7640.66	27258.6	25271	31943.5
145	Smagp	597.228	2.4265	0.196932	12.3215	6.94e-35	7.17e-33	214.062	166.185	254.329	279.076	218.403	1255.25	1156.19	1234.32
146	Fzd4	539.798	-2.68744	0.218368	-12.307	8.31e-35	8.52e-33	998.543	768.816	722.422	648.028	820.731	143.823	115.863	100.158
147	Rtn4rl1	3863.2	-2.32897	0.189379	-12.2979	9.29e-35	9.47e-33	7127.21	4780.69	5064.5	5457.44	5184.05	1389.6	868.624	1033.49
148	Eps8	253.491	2.79829	0.227647	12.2923	9.97e-35	1.01e-32	74.9803	92.3727	80.154	72.9769	70.253	455.897	635.662	545.636
149	Olfml2b	1311.6	-2.50301	0.203907	-12.2752	1.23e-34	1.24e-32	2511.33	1992.76	1827.78	1740.35	1413.28	368.678	285.715	352.929
150	B3galt5	1005.11	-2.3993	0.195549	-12.2696	1.32e-34	1.32e-32	1775.7	1600.95	1357.5	1237.74	1262.63	271.238	318.925	216.167
151	Ms4a14	230.691	5.34262	0.438043	12.1966	3.24e-34	3.22e-32	11.9906	2.17119	14.1022	21.9142	23.3245	703.066	531.137	537.821
152	Rftn1	778.669	3.09949	0.254316	12.1876	3.62e-34	3.57e-32	286.721	190.809	143.944	142.754	252.975	2027.85	1850.24	1334.06
153	Pltp	4388.29	5.86755	0.483233	12.1423	6.31e-34	6.17e-32	352.499	127.845	62.139	210.623	224.429	10666.3	10799.1	12663.3
154	St3gal5	1994.83	-2.70767	0.223029	-12.1404	6.45e-34	6.26e-32	2762.86	2900.81	3314.73	3097.08	2516.29	506.225	267.358	593.273
155	Tspan18	1771.57	-2.83641	0.233641	-12.14	6.48e-34	6.26e-32	3543.57	2689.22	2317.52	2328.12	2212.02	493.441	361.323	227.337
156	Cdh23	1921.06	-2.24345	0.185522	-12.0927	1.15e-33	1.11e-31	3357.25	2957.32	2407.02	1995.7	2925.43	574.087	590.029	561.622
157	H2-D1	22903.7	1.97022	0.163338	12.0622	1.67e-33	1.6e-31	12959.5	12787.2	9264.32	8856.79	10808.5	42905.2	38650.1	46997.8
158	Trim25	1786.89	2.03863	0.169265	12.044	2.09e-33	1.98e-31	913.657	942.317	861.369	715.004	687.644	3008.2	3171.67	3995.28
159	Cxcr3	189.667	3.6641	0.304789	12.0218	2.73e-33	2.57e-31	53.1565	22.833	31.6764	40.1758	32.2692	545.562	382.046	409.614
160	Herc2	3430.71	-1.7828	0.148681	-11.9908	3.97e-33	3.72e-31	5086.72	4351.78	3966.68	4863.82	5113.71	1548.48	1286.79	1227.73
161	Tmc7	817.501	-3.26951	0.273118	-11.9711	5.04e-33	4.69e-31	894.684	1307.32	1298.21	1450.61	1179.19	94.0408	92.4393	223.515
162	Aldh2	1522.23	2.09139	0.175693	11.9037	1.13e-32	1.05e-30	878.905	693.022	611.861	572.472	667.026	3097.14	2484.86	3172.58
163	Oas1a	616.274	3.07686	0.258571	11.8994	1.19e-32	1.09e-30	167.509	249.474	113.285	120.375	159.218	1498.87	1106.94	1514.52
164	Havcr2	6421.95	-1.95346	0.164556	-11.8711	1.67e-32	1.53e-30	9669.31	9075.71	9084.02	7267.6	9360.49	1933.64	2101.83	2882.97
165	Clec12a	726.728	4.07895	0.343785	11.8648	1.8e-32	1.64e-30	47.1162	54.1668	113.702	158.907	147.04	1692.31	1332.98	2267.6
166	Mndal	233.446	3.90467	0.329781	11.8402	2.42e-32	2.18e-30	16.694	32.4854	60.1886	45.8184	33.2912	631.045	454.584	593.463
167	Ifitm10	508.425	-2.71716	0.22973	-11.8276	2.81e-32	2.52e-30	931.596	726.329	707.027	652.252	720.027	148.416	99.2949	82.4553
168	Pydc4	756.56	3.34458	0.282878	11.8234	2.95e-32	2.63e-30	83.8814	147.351	216.268	206.171	198.659	2350.66	1393.51	1455.98
169	Ctsb	92546.9	1.51746	0.12895	11.7678	5.72e-32	5.07e-30	60641.9	56798.8	48715.8	50050.4	56215.6	165184	139141	163627
170	Arhgap27	4724.24	-2.30717	0.196119	-11.7642	5.97e-32	5.26e-30	8217.96	7098.77	5938.46	5964.19	6505.99	1840.62	1189.34	1038.57
171	Cd300lh	228.222	4.48001	0.380998	11.7586	6.38e-32	5.59e-30	2.64218	33.2826	32.854	28.6427	26.7026	595.639	595.336	510.675
172	Fcrl1	1053.99	-2.39513	0.204238	-11.7271	9.25e-32	8.06e-30	1885.93	1358.58	1457.19	1182.93	1688.79	346.385	246.656	265.438
173	Fam110a	1713.92	-2.14969	0.183789	-11.6966	1.33e-31	1.15e-29	2643.6	2489.97	2147.34	2048.32	2758.06	684.034	459.657	480.37
174	Numb	4962.5	-1.86632	0.15997	-11.6666	1.89e-31	1.62e-29	7831.71	6920.72	6197.03	5622.73	7518.98	2149.96	1610.79	1848.06
175	Oas1g	282.322	3.55699	0.305528	11.6421	2.52e-31	2.16e-29	31.4272	73.6775	67.7391	39.2447	64.9732	868.85	568.988	543.68
176	Nav2	2534.69	-1.74494	0.15003	-11.6306	2.88e-31	2.45e-29	3465.51	3744.48	3427.2	3805.42	2753.86	1064.89	970.901	1045.27
177	Rasgrp3	4395.88	-1.80545	0.155542	-11.6074	3.78e-31	3.2e-29	6406.72	6618.31	5506.68	5065.56	6411.94	1934.42	1429.98	1793.43
178	Nlrc4	273.585	3.07322	0.264872	11.6027	3.99e-31	3.36e-29	74.6261	51.5579	92.0363	56.7326	85.2297	576.166	505.842	746.49
179	Arhgef40	3311.81	-1.67586	0.1446	-11.5896	4.65e-31	3.89e-29	4487.16	4000.09	4466.21	5339.44	4009.63	1445.92	1310.83	1435.23
180	Ptpn22	261.056	2.82641	0.24429	11.5699	5.86e-31	4.87e-29	60.4839	61.9842	83.4039	102.208	90.0006	575.147	616.176	499.043
181	Cd44	274.967	3.36937	0.292535	11.5178	1.07e-30	8.88e-29	72.6829	34.6938	71.1354	60.8568	68.0598	814.48	465.26	612.568
182	Fam129a	2899.69	2.41984	0.211709	11.43	2.96e-30	2.44e-28	1579.85	1274.54	942.16	780.936	934.467	6003.03	5575.34	6107.2
183	Tagln2	1433.42	1.94253	0.170733	11.3776	5.41e-30	4.42e-28	842.524	604.547	686.816	633.75	697.374	2616.52	2235.02	3150.8
184	C5ar1	8501.4	2.12755	0.187027	11.3756	5.53e-30	4.5e-28	3907.65	3990.58	3549.89	2958.67	4361.19	14731.9	12979.8	21531.4
185	Whrn	651.845	-3.2263	0.284484	-11.3409	8.23e-30	6.66e-28	854.464	971.111	947.909	1340.84	790.738	160.954	65.0383	83.6996
186	Gng10	4279.07	-1.80245	0.159105	-11.3286	9.47e-30	7.62e-28	5391.85	6428.43	5366.34	6839.61	5170.37	1790.04	1386.12	1859.82
187	Igfbp4	2072.23	1.63479	0.14457	11.3079	1.2e-29	9.6e-28	1266.69	976.996	1179.57	1186.48	1189.76	3916.64	3712.56	3149.12
188	Milr1	1010.28	2.02936	0.179483	11.3067	1.22e-29	9.69e-28	418.732	461.4	447.6	498.98	513.552	2277.67	1460.62	2003.69
189	Dram1	135.518	4.82627	0.427073	11.3008	1.3e-29	1.03e-27	3.1353	7.67469	17.9463	10.9413	18.531	356.851	382.087	286.98
190	Sowahc	2781.29	-1.751	0.154966	-11.2992	1.32e-29	1.04e-27	4301.32	3329.19	3608.22	3725.44	3923.17	1316.83	953.08	1093.04
191	P2ry13	39056.6	-1.77506	0.157163	-11.2944	1.4e-29	1.1e-27	58953.9	52899.2	52926	42340.1	58723.5	17701.8	12809.2	16099
192	Nceh1	821.481	2.15635	0.190979	11.291	1.45e-29	1.13e-27	369.201	432.416	373.405	366.56	248.451	1677.39	1545.81	1558.62
193	Atg16l2	750.076	1.90375	0.168668	11.2869	1.52e-29	1.18e-27	312.901	411.036	375.147	406.728	344.644	1551.38	1244.97	1353.8
194	Siglec1	494.602	2.70774	0.239939	11.2851	1.55e-29	1.2e-27	112.224	229.163	142.4	175.839	142.375	1218.55	939.318	996.946
195	Iqgap2	202.273	4.50583	0.399803	11.2701	1.84e-29	1.42e-27	2.66594	24.9605	29.8335	34.804	16.5355	469.529	471.679	568.176
196	Dagla	916.47	-2.01404	0.178789	-11.2649	1.96e-29	1.49e-27	1377.81	1325.44	1492.13	1047.38	1150.42	334.88	329.608	274.094
197	Capn3	4312.02	-1.50536	0.13381	-11.2499	2.32e-29	1.76e-27	5915.75	5682.13	5044.29	5674.47	6171.3	2270.37	1864.89	1872.99
198	Klk8	664.145	-3.39204	0.301633	-11.2456	2.43e-29	1.84e-27	699.22	1191.11	963.116	1011.5	1178.24	138.195	100.971	30.8164
199	Tmem205	136.355	3.98122	0.354133	11.2421	2.53e-29	1.91e-27	30.3612	18.0209	27.8532	18.468	11.4819	393.826	257.912	332.917
200	Wfdc17	2708.69	5.90085	0.526055	11.2172	3.36e-29	2.51e-27	157.817	83.4594	39.2163	86.0582	221.518	6942.55	6318.48	7820.45
201	2610507B11Rik	4238.77	1.60534	0.14369	11.1722	5.58e-29	4.16e-27	2788.63	2685.3	2253.93	2047.68	2228.36	7684.46	7165.59	7056.19
202	Mpp1	1492.69	1.8396	0.165648	11.1055	1.18e-28	8.75e-27	627.489	931.704	791.982	788.463	649.787	2653.99	2632.46	2865.64
203	Chn2	1674.17	-1.78143	0.160606	-11.0919	1.37e-28	1.01e-26	2648.46	2201.9	2278.7	2221.15	2064.31	788.986	593.849	595.972
204	Fmnl3	3170.86	-1.73288	0.156238	-11.0913	1.38e-28	1.01e-26	4865.33	3695.7	4490.3	4786.97	3651.45	1417.78	1172.23	1287.12
205	Tox2	112.735	4.82044	0.434842	11.0855	1.48e-28	1.08e-26	2.07975	11.9846	9.73121	7.79708	18.165	314.102	302.643	235.374
206	4930506M07Rik	184.868	3.31999	0.299853	11.072	1.71e-28	1.25e-26	37.042	34.1701	51.0762	58.1261	33.7516	511.56	449.744	303.474
207	Scpep1	4361.52	1.27982	0.115619	11.0693	1.77e-28	1.28e-26	2749.13	3074.43	2794.02	2624.53	2956.49	7128.61	6645.04	6919.94
208	Lrba	1585.97	-2.05749	0.186362	-11.0403	2.44e-28	1.76e-26	2121.39	2247.28	2355.64	2599.44	1746.53	479.765	455.976	681.756
209	Pik3r5	3899.52	-1.43881	0.13035	-11.0381	2.5e-28	1.79e-26	5483.86	5295.07	4837.87	5521.25	4412.65	1913.01	1925	1807.44
210	Il7r	632.028	-2.59952	0.236259	-11.0028	3.7e-28	2.64e-26	1065.56	966.339	876.438	849.399	838.167	95.0179	194.368	170.935
211	Tuba1a	5533.66	-1.50816	0.137364	-10.9793	4.81e-28	3.41e-26	6865.37	8001.59	7335.41	6157.2	8202.75	2697.29	2530.2	2479.44
212	Pear1	682.934	-2.22004	0.20222	-10.9783	4.86e-28	3.43e-26	1105.95	1026.51	990.7	742.423	981.593	252.009	188.443	175.843
213	P2rx4	3801.3	1.48395	0.135215	10.9748	5.05e-28	3.55e-26	2189.96	2568.73	2419.72	1895.6	2277.18	6458.33	6205.44	6395.43
214	Adam10	7936.23	-1.34537	0.122632	-10.9709	5.28e-28	3.69e-26	10974.3	10948.8	10286.8	9197.16	9950.88	4290.1	3711.16	4130.6
215	Tmem176b	13018.9	1.34828	0.122958	10.9654	5.61e-28	3.91e-26	7697.44	8745.73	7478.52	9166.42	8111.76	21598.2	19491.6	21861.7
216	Dusp27	309.684	-3.01753	0.27558	-10.9498	6.66e-28	4.62e-26	499.768	603.119	433.533	365.533	413.557	70.3098	55.8793	35.7684
217	Susd1	377.654	2.32449	0.212486	10.9395	7.46e-28	5.15e-26	112.692	151.119	132.859	168.629	187.244	701.573	785.686	781.429
218	Sh3pxd2b	379.348	3.35488	0.307296	10.9174	9.52e-28	6.51e-26	48.146	52.1834	118.364	117.061	89.1728	725.513	1067.45	816.89
219	Stk17b	3380.88	1.87138	0.17141	10.9176	9.5e-28	6.51e-26	1823.81	1932.69	1345.96	1357.43	2003.91	5899.27	6518.51	6165.49
220	Dnase1l1	321.726	2.74219	0.25146	10.9051	1.09e-27	7.42e-26	115.782	133.895	79.8619	74.2732	107.522	560.913	735.074	766.483
221	Adamtsl2	218.228	-5.44099	0.500696	-10.8668	1.66e-27	1.12e-25	309.905	226.787	317.681	237.128	629.354	3.90451	13.0321	8.03514
222	Oasl2	517.69	3.14452	0.289435	10.8643	1.7e-27	1.15e-25	166.125	170.848	119.88	74.2956	125.169	1525.51	759.799	1199.89
223	Gm11709	137.239	4.14178	0.381329	10.8614	1.76e-27	1.18e-25	14.2846	30.5657	10.385	25.078	13.3614	397.598	257.413	349.228
224	Clec4b1	209.866	4.96445	0.45748	10.8517	1.96e-27	1.31e-25	26.226	22.2428	5.65478	4.27055	26.51	754.733	406.909	432.378
225	Lag3	9037.02	-1.89862	0.17539	-10.8251	2.62e-27	1.74e-25	15218.3	13373.1	11116.8	10488.9	12064	3619.22	2571.83	3844.1
226	H2-Q7	1092.63	2.42833	0.224356	10.8236	2.66e-27	1.76e-25	409.505	618.328	359.812	299.535	375.543	1947.05	2265.66	2465.61
227	Tgfbi	4045.89	1.83432	0.169692	10.8097	3.1e-27	2.04e-25	1980.7	2604.71	1651.13	1953.06	2122.69	7670.89	8167.55	6216.41
228	St8sia4	1335.92	2.32368	0.215094	10.8031	3.33e-27	2.19e-25	462.025	478.918	620.801	555.622	558.595	3245.93	3085.57	1679.93
229	Amz1	1356.67	-1.82283	0.169143	-10.7768	4.43e-27	2.9e-25	2326.47	1884.52	1594.13	1663.13	1804.31	494.674	517.607	568.493
230	Camkk1	387.658	-2.77876	0.25842	-10.7529	5.74e-27	3.74e-25	677.212	597.897	538.735	406.061	632.919	63.5098	103.425	81.5032
231	Aplp2	3980.28	1.8229	0.169641	10.7456	6.21e-27	4.03e-25	2476.66	2084	1996.17	1501.53	2144.35	7741.52	7557.85	6340.16
232	Slc25a10	911.538	1.96073	0.182773	10.7277	7.55e-27	4.87e-25	440.793	531.914	426.532	335.732	445.491	1697.45	1484.79	1929.61
233	Plekho2	2087.9	2.15334	0.200899	10.7186	8.33e-27	5.35e-25	1171.92	888.256	748.034	750.113	993.118	4602.4	3011.95	4537.4
234	Crip1	189.312	3.54089	0.331425	10.6838	1.21e-26	7.75e-25	23.6275	28.6102	29.1194	42.5904	63.7227	443.65	385.242	497.933
235	Antxr2	350.606	3.54462	0.332125	10.6725	1.37e-26	8.72e-25	54.6497	51.0074	98.6239	34.8085	109.643	682.087	974.042	799.984
236	Atp6v0a2	3867.49	-1.74531	0.163876	-10.6502	1.74e-26	1.1e-24	6338.93	6089.69	4679.06	4434.64	4710.58	1620.64	1639.26	1427.13
237	Fgl2	1032.44	2.84763	0.267838	10.6319	2.12e-26	1.34e-24	410.294	385.418	317.794	140.509	298.473	2326.42	2040.58	2340.02
238	Ftl1	44308	1.67075	0.157174	10.6299	2.16e-26	1.36e-24	25275.4	26066.1	20517.7	25132.6	24797.7	81754.7	60091.3	90828.7
239	Sh3bgrl	408.201	2.39136	0.225111	10.623	2.33e-26	1.46e-24	171.608	185.269	108.435	179.704	143.091	942.813	720.225	814.465
240	Acsl3	511.426	3.2205	0.303251	10.6199	2.41e-26	1.5e-24	108.923	122.898	168.427	158.202	66.8184	1341.79	1406.39	717.956
241	Clic4	703.324	2.63038	0.249027	10.5626	4.44e-26	2.76e-24	193.04	196.56	349.518	249.486	200.823	1234.04	1224.38	1978.75
242	Gm4951	493.344	2.88964	0.273737	10.5562	4.75e-26	2.94e-24	146.412	219.422	81.4462	133.898	142.995	1269.57	1051.93	901.078
243	Dclre1c	1804.43	1.80016	0.170562	10.5543	4.85e-26	2.99e-24	1000.05	1095.68	728.863	880.48	963.063	3470.17	2746.95	3550.19
244	Endod1	1633.06	-1.73257	0.165056	-10.4968	8.93e-26	5.48e-24	2466.45	2197.03	1968.74	2384.43	2065.28	804.532	619.549	558.47
245	Ccl2	266.533	3.56683	0.340376	10.4791	1.08e-25	6.59e-24	20.1128	71.2229	43.9099	45.2338	78.2037	704.211	505.841	663.53
246	Csnk1e	2294.29	-1.42668	0.136347	-10.4636	1.27e-25	7.73e-24	3234.24	2889.43	2932.72	3194.5	2761.88	1252.93	1029.68	1058.94
247	Gfm2	5497.16	-1.33829	0.128399	-10.4229	1.95e-25	1.18e-23	7423.53	7058.57	6381.7	7351.15	7308.99	2807.92	2497.71	3147.68
248	2610528A11Rik	232.192	-2.9714	0.285589	-10.4044	2.37e-25	1.43e-23	326.11	326.531	327.555	401.24	355.423	42.1178	58.7841	19.7782
249	Scoc	4193.52	-1.62072	0.155955	-10.3922	2.69e-25	1.62e-23	4777.46	5798.77	5296.02	7075.77	5118.23	1860.65	1714.8	1906.47
250	Spic	416.503	3.07797	0.296567	10.3787	3.1e-25	1.86e-23	124.61	68.653	159.871	95.303	104.766	1166.8	1037.62	574.404
251	Itgb3	1838.34	-1.98978	0.192549	-10.3339	4.95e-25	2.95e-23	3191.74	2646.79	2499.49	2380.19	2037.71	572.808	547.771	830.258
252	Cadm1	4275.7	1.17691	0.114272	10.2992	7.11e-25	4.22e-23	3112.75	3054.29	2746.68	2884.3	2715.98	6538.23	6443.43	6709.96
253	Phgdh	2662.09	-2.21804	0.215987	-10.2693	9.69e-25	5.74e-23	4587.86	4160.53	3592.89	3327.6	3177.53	877.812	521.953	1050.57
254	Zfp69	1271.36	-1.59677	0.155592	-10.2625	1.04e-24	6.13e-23	1616.74	1678.64	1535.47	1768.1	1893.04	644.245	499.497	535.16
255	H2-Oa	601.968	-2.38961	0.233009	-10.2554	1.12e-24	6.57e-23	963.213	942.482	779.605	810.787	804.067	152.89	114.747	247.953
256	Trf	69659	1.40029	0.136852	10.2321	1.42e-24	8.33e-23	50069.7	46357.2	39435.9	36048	43774.8	116678	109596	115313
257	C4b	548.027	2.5841	0.252838	10.2204	1.61e-24	9.36e-23	141.265	253.017	162.77	130.58	258.533	1064.88	1153.4	1219.77
258	Cyp27a1	4288.19	1.88443	0.185075	10.182	2.39e-24	1.39e-22	2264.45	2460.29	1709.81	2323.72	1918.86	9821.06	7716.57	6090.76
259	Sema6d	1323.08	1.36426	0.134111	10.1726	2.63e-24	1.52e-22	827.251	842.98	753.244	819.947	918.686	2127.33	2265.25	2029.92
260	Ms4a4a	2830.94	5.73207	0.5652	10.1417	3.61e-24	2.08e-22	143.971	160.447	38.765	72.684	271.675	8091.55	7494.06	6374.38
261	Emb	110.854	3.87855	0.38337	10.117	4.64e-24	2.67e-22	17.3079	9.23158	25.7503	15.9738	22.1632	193.995	313.267	289.145
262	Ap2a2	3678.5	1.67325	0.165538	10.108	5.09e-24	2.9e-22	2553.21	2097.63	1992.56	1581.68	1878.95	7068.03	5993.98	6261.95
263	Tmem204	1323.2	-1.91373	0.189328	-10.108	5.09e-24	2.9e-22	2249.4	2091.38	1585.87	1550.87	1659.99	572.379	432.022	443.721
264	Duoxa1	161.789	-3.9008	0.385967	-10.1066	5.17e-24	2.93e-22	287.81	246.581	236.777	152.259	326.068	17.4384	20.6122	6.76834
265	Tspan7	3156.61	-1.35835	0.134587	-10.0927	5.95e-24	3.36e-22	4500.46	3963.3	3781.16	4382.76	3839.21	1763	1452.05	1570.94
266	Gm996	677.43	-2.22686	0.221014	-10.0757	7.08e-24	3.99e-22	1146.3	1201.27	935.12	711.074	812.024	225.473	191.015	197.16
267	Cds1	664.743	-2.27339	0.226208	-10.05	9.19e-24	5.15e-22	1041.24	984.558	906.366	1042.65	774.219	264.84	173.95	130.114
268	Tuba1c	1255.56	2.12234	0.211425	10.0383	1.03e-23	5.78e-22	408.222	683.115	674.442	528.289	480.32	2637.94	1864.46	2767.67
269	Slfn5	643.092	2.31887	0.231178	10.0307	1.12e-23	6.22e-22	162.445	343.678	288.508	232.9	256.361	1477.9	1132.52	1250.42
270	Fam43a	296.644	2.19257	0.218856	10.0183	1.27e-23	7.03e-22	121.17	150.409	108.79	108.778	143.368	661.044	516.567	563.029
271	Slc5a10	161.127	-4.0458	0.405746	-9.97128	2.04e-23	1.13e-21	367.783	177.498	252.677	264.724	185.138	19.4231	13.5712	8.20075
272	Bst2	2096.49	1.7633	0.176862	9.9699	2.06e-23	1.14e-21	1099.68	1334.52	1016.14	927.15	1140.69	4323.46	2924.45	4005.85
273	Vcam1	5444.8	5.58357	0.560771	9.95694	2.35e-23	1.29e-21	243.737	169.385	146.915	204.402	697.574	14171	14235.5	13689.9
274	Phyhd1	6594.02	-1.50606	0.151559	-9.93715	2.87e-23	1.57e-21	9700.1	8910.73	7541.54	8140.15	9255.53	3499.2	2514.7	3190.22
275	Ldlrad4	2045.31	-1.63382	0.164912	-9.90718	3.87e-23	2.11e-21	3326.99	2601.3	2748.47	2542.5	2496.24	1039.6	754.938	852.438
276	Ache	284.783	-3.67015	0.371123	-9.88933	4.63e-23	2.51e-21	318.27	540.028	468.44	471.46	392.219	36.5011	51.3464	0
277	Ehd4	6286.27	1.54729	0.156465	9.88903	4.65e-23	2.51e-21	4491.8	3867.99	3306.31	3069.54	3532.11	12024.3	9686.14	10312
278	Snn	1558.88	-1.63989	0.165922	-9.88352	4.91e-23	2.64e-21	1955.71	2289.5	1965.5	2283.6	1967.98	814.825	560.392	633.506
279	Flot2	515.043	2.0126	0.203703	9.88006	5.08e-23	2.73e-21	329.922	219.552	196.521	234.44	225.66	947.421	906.579	1060.25
280	Slc26a11	487.252	2.02974	0.205891	9.85832	6.31e-23	3.38e-21	212.868	276.295	189.667	184.2	261.852	989.329	821.604	962.201
281	Ccng2	851.994	-1.69806	0.172476	-9.84518	7.19e-23	3.83e-21	1073.64	1017.39	1128.88	1380.79	1152.82	319.328	393.015	350.083
282	Pstpip2	188.121	2.99029	0.303902	9.83965	7.6e-23	4.04e-21	63.8584	44.5493	61.5569	27.022	63.6166	443.632	355.922	444.812
283	Anxa3	6901.43	-1.27586	0.129968	-9.81673	9.54e-23	5.05e-21	8350.01	9361.63	8493.43	9484.21	8546.7	3921.26	3139.11	3915.12
284	Kcnd1	1560.59	-2.12457	0.216788	-9.80023	1.12e-22	5.92e-21	2885.77	2225.22	2052.75	1706.69	2114.01	670.838	410.262	419.196
285	Slamf9	3070.14	1.53994	0.157259	9.79236	1.21e-22	6.38e-21	1893.24	2169.52	1544.3	1786.04	1550.27	5223.78	4656.63	5737.36
286	Rgs2	9564.38	-1.21268	0.123937	-9.78469	1.31e-22	6.86e-21	11739.6	12788.8	11538	12452.5	12269.3	5979.1	4763.58	4984.19
287	Eps15	2477	1.45767	0.149335	9.76106	1.65e-22	8.63e-21	1672.5	1485.27	1555.22	1534.97	1243.16	4696.86	3929.63	3698.42
288	Cst3	425971	-1.40107	0.143846	-9.74009	2.03e-22	1.06e-20	540592	595761	516651	564580	559288	217819	167116	245964
289	Elmo1	15384	-1.24879	0.128286	-9.73443	2.15e-22	1.11e-20	22462.8	19932.9	18551	17986.4	19321.9	8749.85	7409.02	8658.42
290	Fam213a	340.73	2.22705	0.229492	9.7043	2.89e-22	1.49e-20	131.027	126.575	194.117	121.28	141.161	658.804	558.32	794.556
291	Trpv4	939.754	3.08965	0.31861	9.69726	3.1e-22	1.59e-20	312.226	295.507	135.852	162.352	327.432	2877.52	2239.79	1167.36
292	Cyb561a3	653.036	-1.96267	0.202435	-9.6953	3.16e-22	1.62e-20	1035.64	1088.38	877.526	679.86	845.843	245.134	219.477	232.432
293	Hexb	240110	-1.47181	0.152082	-9.67772	3.75e-22	1.92e-20	335663	343498	295314	313647	291114	115900	89494.2	136252
294	Slc2a5	19076.4	-2.04025	0.211363	-9.65285	4.78e-22	2.44e-20	33134.2	28381.2	24166.4	19353.7	28136.2	7694.53	4342.2	7402.59
295	Olfml3	54758.4	-1.73773	0.180031	-9.65235	4.8e-22	2.44e-20	84319.6	81347.8	67643.9	58573.2	79375.7	24957.2	16420.1	25429.7
296	Cd48	3977.32	1.39821	0.145103	9.63597	5.64e-22	2.85e-20	2129.99	2667.07	2275	2698.23	2554.72	7427.18	5760.81	6305.55
297	Zbp1	162.84	3.08893	0.321229	9.61597	6.85e-22	3.45e-20	31.5401	65.0036	34.6986	51.8072	30.1028	419.045	330.098	340.422
298	Ier2	447.562	2.76817	0.288532	9.59397	8.48e-22	4.26e-20	120.849	183.279	121.023	82.5386	193.548	1256.71	741.799	880.753
299	Fgf13	240.061	-2.84954	0.297048	-9.59286	8.57e-22	4.29e-20	379.658	280.114	463.758	314.531	327.6	56.1126	34.5498	64.1661
300	Ets1	1834.55	-1.58741	0.165839	-9.57202	1.05e-21	5.23e-20	2805.15	2366.82	2679.95	2124.49	2275.13	954.537	800.892	669.401
301	Samd4	151.842	3.34106	0.349312	9.56467	1.13e-21	5.6e-20	21.5135	46.2218	54.9924	20.9324	28.2104	330.884	358.49	353.488
302	Aoah	1810.87	6.27551	0.657768	9.54061	1.42e-21	7.04e-20	97.1904	43.4428	48.1782	9.98371	106.507	5097.21	4529.47	4554.96
303	Rasal3	7669.32	-1.85909	0.194999	-9.53382	1.52e-21	7.49e-20	12069	11752	8177.1	9736.33	10921.3	3868.77	2275.88	2554.27
304	Rell1	440.091	2.14775	0.225807	9.51146	1.88e-21	9.26e-20	197.035	143.096	223.423	250.182	151.525	786.634	866.606	902.225
305	Iigp1	156.913	3.61499	0.380319	9.50516	2e-21	9.81e-20	20.2886	33.8025	54.4173	13.244	27.0137	316.701	417.827	372.013
306	Stom	653.454	1.68827	0.177836	9.49341	2.24e-21	1.09e-19	399.364	391.558	388.009	318.608	283.348	1132.15	1091.93	1222.66
307	Nrp1	7586.14	1.50911	0.159094	9.48566	2.41e-21	1.18e-19	5398.57	4981.43	4168.63	3725.2	4146.02	14526.6	12410.3	11332.5
308	Pdxk	1302.15	1.51504	0.159749	9.48389	2.45e-21	1.19e-19	890.281	759.746	690.536	704.418	792.434	2478.96	1851.27	2249.58
309	Kif21b	3647.01	-1.20263	0.12682	-9.48296	2.47e-21	1.2e-19	5281.69	4620.38	4666.27	4197.72	4382.7	2045.26	2034.17	1947.89
310	Adamts16	568.655	-2.01846	0.213537	-9.45252	3.31e-21	1.6e-19	781.389	967.132	778.537	777.954	636.902	164.09	186.936	256.298
311	Spata13	4635.24	-1.60148	0.16975	-9.43438	3.93e-21	1.89e-19	7816.66	6276.17	6105.92	5002.41	5744.38	2017.63	1760.54	2358.18
312	Gm7694	494.71	-2.30591	0.244774	-9.4206	4.49e-21	2.15e-19	901.865	613.947	787.402	488.262	729.54	118.833	142.697	175.131
313	Gstm1	331.901	2.47947	0.263427	9.41236	4.85e-21	2.32e-19	91.0934	155.724	92.3395	137.645	134.205	889.415	622.95	531.837
314	Pald1	9372.96	-1.60348	0.170364	-9.4121	4.86e-21	2.32e-19	15992.9	13025.9	11097.4	10386.3	12110.7	4536.45	3428.66	4405.39
315	Orai2	1870.27	-1.9717	0.209861	-9.39525	5.71e-21	2.71e-19	3210.6	2906.81	2679.79	2337.38	1854.86	837.029	602.17	533.526
316	Cenpa	225.28	2.67008	0.284307	9.39154	5.91e-21	2.8e-19	88.5766	84.4709	58.7874	70.5421	68.2327	365.204	381.086	685.34
317	C3ar1	15316.7	1.45221	0.154734	9.3852	6.28e-21	2.97e-19	10284.9	10090	9004.68	8452.21	8541.21	25229.4	20426.5	30505.1
318	Plxdc1	2322.8	-1.908	0.203383	-9.38131	6.52e-21	3.07e-19	4104.37	2961.5	3102.24	2992.58	2879.73	1101.63	853.802	586.558
319	Tspan9	1113.67	-1.63312	0.174469	-9.3605	7.94e-21	3.73e-19	1785.22	1629.72	1470.11	1252.44	1317.1	442.5	479.776	532.474
320	Prune2	2690.65	1.25993	0.134944	9.33669	9.94e-21	4.65e-19	1852.59	1966.76	1682.77	1580.92	1746.34	4528.43	3791.72	4375.68
321	Ier3	266.086	3.25121	0.349055	9.31432	1.23e-20	5.73e-19	80.8329	58.806	45.2476	26.349	104.872	596.432	567.618	648.528
322	Arhgap10	112.116	4.51677	0.485192	9.30923	1.29e-20	5.99e-19	0	15.7419	17.434	6.9834	17.8381	259.259	234.8	344.868
323	Nlrp1b	520.335	-1.65588	0.17821	-9.29171	1.52e-20	7.04e-19	721.287	730.649	773.306	662.459	617.396	224.745	238.107	194.726
324	Npnt	759.618	-1.99353	0.215152	-9.26567	1.94e-20	8.96e-19	1089.34	1236.21	982.528	1099.73	886.558	353.997	234.62	193.968
325	Man2a1	715.57	3.09942	0.334889	9.25507	2.14e-20	9.87e-19	140.541	82.4029	178.295	282.847	249.768	1252.08	1263.51	2275.12
326	Ly9	1288.23	1.904	0.205788	9.25227	2.2e-20	1.01e-18	790.681	617.542	420.989	612.736	734.377	2646.49	2035.59	2447.43
327	Clec4a3	4110.25	1.35933	0.147005	9.24685	2.31e-20	1.06e-18	2127.66	2661.69	2496.03	2853.62	2813.94	7407.65	6665.65	5855.76
328	Itgam	20382.3	-1.70721	0.185126	-9.22191	2.92e-20	1.33e-18	34857.8	29683.5	25810.5	19811.6	27585.3	9936.07	7107.57	8265.99
329	Fam167b	460.334	-1.94601	0.211116	-9.21769	3.04e-20	1.38e-18	760.446	690.147	546.828	544.072	647.721	193.862	144.285	155.31
330	Cd52	2126.98	1.52225	0.16532	9.20788	3.33e-20	1.51e-18	1204.86	1429.59	994.489	1304.17	1312.45	4091.99	3016.23	3662.03
331	Srgap2	17554.4	-1.25401	0.136611	-9.17938	4.34e-20	1.96e-18	24873.4	24146.1	20634.7	21413.6	21128.9	10201	7984.73	10052.7
332	Mlxipl	3349.76	-1.60982	0.175458	-9.17499	4.52e-20	2.04e-18	5165.03	4862.71	3778.08	4232.83	4348.35	1680.16	1104.15	1626.77
333	Dtx4	2571.06	-1.55635	0.169702	-9.17112	4.68e-20	2.11e-18	4134.32	3377.02	2968.41	2907.96	3712.32	1298.25	1211.02	959.178
334	Rpsa	707.453	1.67932	0.184337	9.11007	8.23e-20	3.69e-18	351.012	381.522	409.733	474.299	316.418	1189.95	1114.72	1421.96
335	Sort1	1604.5	-1.55723	0.171451	-9.08267	1.06e-19	4.74e-18	2276.92	2555.84	1687.92	2120.84	2023.02	814.301	655.157	701.975
336	Gatm	5184.27	1.3251	0.146056	9.07259	1.16e-19	5.18e-18	3436.21	3484.13	3000.5	3766.8	2875.19	8585.14	7158.32	9167.9
337	Ahr	114.379	4.37779	0.484069	9.04371	1.51e-19	6.73e-18	10.6447	15.212	5.47125	9.16508	29.0346	290.396	408.342	146.769
338	Zbtb16	155.258	4.31332	0.477184	9.03911	1.58e-19	7e-18	17.3258	13.0242	8.28979	36.8131	22.0634	575.528	425.175	143.842
339	Bmp2	296.016	6.72977	0.744608	9.038	1.6e-19	7.05e-18	18.6475	1.62865	1.65989	8.97227	7.37363	875.547	623.414	830.883
340	Spsb1	1922.83	-2.20571	0.244112	-9.03566	1.63e-19	7.18e-18	2930.72	2430.18	2278.49	3016.47	2973.65	911.893	462.971	378.236
341	Nos1ap	818.715	-2.00974	0.222628	-9.02738	1.76e-19	7.72e-18	1321.62	1054.7	1084.3	1254.21	989.457	389.039	203.131	253.261
342	Epn2	699.131	-1.59205	0.177387	-8.97501	2.83e-19	1.24e-17	1010.84	835.253	1069.42	925.057	814.456	301.807	280.59	355.631
343	Nfxl1	930.995	1.96987	0.220224	8.94485	3.72e-19	1.63e-17	301.406	500.905	358.521	583.026	481.027	1813.86	1918.27	1490.94
344	Clcn5	1253.86	1.57535	0.176273	8.937	4e-19	1.74e-17	911.517	729.138	691.175	694.163	571.872	1882.98	2243.22	2306.79
345	Tmem63a	7156.5	-1.253	0.140482	-8.91926	4.69e-19	2.04e-17	10283	10021.8	9033.59	7656.08	8753.1	4196.21	3761.5	3546.67
346	Arhgap24	378.335	-2.49581	0.280125	-8.90963	5.12e-19	2.22e-17	674.36	661.633	589.329	428.71	376.061	69.9587	110.561	116.069
347	Sec16b	257.005	-2.74259	0.308803	-8.88137	6.6e-19	2.85e-17	436.794	446.308	260.952	472.145	275.396	62.43	55.3069	46.7075
348	Arhgap18	1048.46	1.94406	0.218974	8.87803	6.81e-19	2.93e-17	590.39	487.578	650.982	308.4	497.298	1894.5	1849.77	2108.73
349	Gcnt1	3617.76	-1.41617	0.159822	-8.86095	7.93e-19	3.4e-17	5379.17	4590.24	4631.93	3876.55	5143.7	1959.66	1467.03	1893.84
350	Vhl	2008.7	-1.36027	0.153675	-8.85159	8.63e-19	3.69e-17	3178.59	2654.31	2286.12	2419.02	2491.87	957.685	1102.34	979.682
351	Slc9a9	7693.16	1.30064	0.146986	8.84872	8.85e-19	3.78e-17	5709.14	5224.74	4758.46	4218.02	4926.18	13844.1	10510.1	12354.6
352	Ppcdc	485.847	-2.24675	0.254637	-8.82334	1.11e-18	4.73e-17	605.677	790.739	461.992	640.299	946.307	144.78	130.852	166.129
353	Tmod1	373.6	2.54843	0.288878	8.82184	1.13e-18	4.78e-17	192.32	146.372	73.3786	151.064	104.499	913.327	763.921	643.916
354	Cx3cr1	83224.3	-1.23952	0.140521	-8.82091	1.14e-18	4.8e-17	121561	112525	101526	92010.9	103263	49577.8	38636.4	46694.5
355	Pmepa1	1886	-1.78146	0.201979	-8.82	1.14e-18	4.83e-17	2874.76	2494.13	2412.98	2425.29	2641.59	1005.58	512.334	721.299
356	Plcg1	1692.75	-1.80276	0.204825	-8.80144	1.35e-18	5.68e-17	2044.66	1924.48	2400.94	3336.61	1849.01	661.009	661.096	664.237
357	Ccl8	254.296	3.76396	0.427868	8.79703	1.4e-18	5.89e-17	26.2993	19.2076	23.0583	93.4037	60.9432	557.893	644.557	609.002
358	Abca1	19427.9	1.60657	0.183141	8.77228	1.75e-18	7.33e-17	15275	10397.1	10242.3	8229.43	10835.3	36264.2	31190.5	32989.1
359	Ubash3b	3370.03	-1.55338	0.177377	-8.75749	2e-18	8.33e-17	4463.8	4404.41	4602.09	4391.15	4481.2	1369.09	1168.1	2080.39
360	Adam22	707.66	1.85078	0.211658	8.7442	2.25e-18	9.35e-17	409.184	262.111	373.326	442.122	311.37	1507.22	1291.23	1064.72
361	Rad51b	239.665	2.67401	0.305864	8.74248	2.28e-18	9.46e-17	94.3388	74.074	39.1359	113.323	77.4726	552.635	438.546	527.798
362	Rab3ip	242.327	-2.62494	0.300338	-8.73993	2.33e-18	9.62e-17	320.792	350.305	434.617	364.666	310.58	65.1815	72.7055	19.7683
363	Rpl32	4800.52	1.39292	0.159373	8.73999	2.33e-18	9.62e-17	2611.05	3302.86	2742.94	3588.91	2659.07	8166.64	6686.65	8646.01
364	Csf3r	9771.36	-1.31821	0.150932	-8.73378	2.46e-18	1.01e-16	14566.3	13206.4	11403.9	11480.2	12359.1	6018.87	4354.69	4781.47
365	Emp3	363.282	2.1338	0.24454	8.72578	2.64e-18	1.08e-16	147.865	176.547	116.942	163.08	193.951	878.676	520.53	708.668
366	Txndc16	2087.61	1.44513	0.166488	8.68011	3.95e-18	1.62e-16	1351.17	1239.29	1339.11	1002.57	1415.85	3589.38	3924.63	2838.85
367	Gfra2	145.628	3.01937	0.347885	8.67921	3.99e-18	1.63e-16	37.2931	24.9734	33.201	47.8597	56.543	267.202	443.622	254.331
368	Gpr155	3258.7	-1.61287	0.18646	-8.64997	5.15e-18	2.1e-16	5813.05	4253.34	4615.21	3533.42	3576.1	1546.09	1245.75	1486.65
369	F13a1	3360.7	4.6322	0.536097	8.64062	5.59e-18	2.27e-16	499.873	492.768	153.599	134.258	412.639	10918.5	7959.45	6314.5
370	App	179.399	2.80259	0.324405	8.63915	5.66e-18	2.29e-16	38.6176	37.4647	45.6685	66.8467	86.1159	376.382	339.739	444.358
371	Pea15a	5756.44	1.2425	0.143826	8.63889	5.68e-18	2.29e-16	4373.49	4023.63	3473.58	3220.36	3944.48	10010.3	8382.24	8623.39
372	Tlr5	1903.68	1.49256	0.172842	8.63538	5.85e-18	2.36e-16	1301.16	1399.58	900.829	1025.79	1034.74	3140.53	3017.21	3409.6
373	Rab27a	619.536	-1.50963	0.174995	-8.62668	6.32e-18	2.54e-16	906.455	718.167	827.959	786.38	864.722	325.554	280.002	247.047
374	A630033H20Rik	495.201	-2.0618	0.239077	-8.62401	6.47e-18	2.59e-16	672.834	866.787	636.009	519.696	778.15	202.215	171.156	114.762
375	Ralgds	364.584	1.90879	0.221389	8.62189	6.59e-18	2.63e-16	241.442	156.452	177.498	178.813	150.487	647.548	785.607	578.825
376	Ceacam1	985.015	-2.16335	0.251035	-8.61775	6.83e-18	2.72e-16	1376.31	1402.88	1315.72	970.937	1896.3	431.57	263.714	222.687
377	Serpinb8	150.809	2.80171	0.325289	8.61297	7.12e-18	2.83e-16	53.7983	42.7082	61.701	48.8772	29.1293	413.384	315.324	241.549
378	Ccl9	2424.12	-2.27484	0.264328	-8.60611	7.56e-18	2.99e-16	3593.34	3781.08	3877.2	2647.19	3327.48	715.729	364.375	1086.6
379	Il3ra	135.003	3.43449	0.399278	8.60174	7.85e-18	3.1e-16	35.8678	18.4877	19.1853	20.1109	50.9631	417.94	245.179	272.293
380	Slc46a1	3162.62	-1.39282	0.162376	-8.57775	9.68e-18	3.81e-16	4673.22	4557.17	3587.14	3797.97	3974.58	1794.84	1268.11	1647.9
381	Ywhah	10286.8	-1.23021	0.143445	-8.57615	9.81e-18	3.86e-16	11573.2	11968.2	13885.1	14468.2	13620.4	5588.46	4781.69	6409.21
382	Rasgef1b	1272.09	1.32088	0.154117	8.57061	1.03e-17	4.04e-16	864.845	785.584	840.326	662.315	918.858	2182.81	1899.59	2022.36
383	Ctc1	5239.63	-1.30004	0.152342	-8.53366	1.42e-17	5.53e-16	7183.36	7180.97	5888.38	6763.88	6695.83	3338.49	2342.51	2523.58
384	Tgfa	2377.12	-1.61409	0.189144	-8.53364	1.42e-17	5.53e-16	3556.66	2458.22	3403.52	3178.94	3299.67	1267.23	776.74	1075.95
385	Alpk1	456.855	1.77293	0.207917	8.52712	1.5e-17	5.84e-16	266.651	253.203	214.465	283.873	177.976	791.683	735.865	931.123
386	Gcnt2	406.193	-3.03676	0.35617	-8.52614	1.51e-17	5.87e-16	632.047	504.559	414.654	613.918	858.56	29.3114	104.669	91.8291
387	Rilpl1	1030.17	-1.79536	0.210648	-8.52306	1.55e-17	6.01e-16	1601.74	1117.01	1257.82	1614.46	1434.32	503.582	295.274	417.163
388	Galc	993.333	1.5528	0.183295	8.47157	2.42e-17	9.35e-16	539.522	638.916	456.343	633.739	601.189	1427.7	1591.42	2057.83
389	Mthfr	1389.54	1.48231	0.175039	8.46846	2.49e-17	9.57e-16	948.414	953.967	740.621	771.347	746.813	2480.34	2635.81	1838.99
390	Klhl7	964.237	-1.78269	0.210637	-8.46335	2.6e-17	9.98e-16	1270.4	1508.28	1191.15	1229.88	1366.69	495.125	260.47	391.904
391	Slc38a1	1396.02	-1.53856	0.181862	-8.46003	2.67e-17	1.02e-15	2182.65	1713.9	1796.98	1879.79	1672.85	729.012	478.504	714.433
392	C030017K20Rik	1067.16	-1.57858	0.187192	-8.43295	3.37e-17	1.29e-15	1315.73	1518.29	1142.67	1689.95	1455.58	541.68	503.304	370.06
393	Plbd1	262.519	3.84581	0.456089	8.43214	3.39e-17	1.29e-15	66.921	6.35308	41.3659	54.5908	50.9943	649.737	503.578	726.609
394	Htr1b	211.623	2.37214	0.2814	8.42975	3.46e-17	1.32e-15	50.639	87.3772	85.4033	83.6064	105.465	466.539	498.595	315.358
395	Ptplad2	1723.74	1.50538	0.178983	8.41077	4.07e-17	1.54e-15	788.755	1268.93	890.433	1122.83	1029.99	3247.14	2762.87	2678.97
396	Serpinb6a	616.692	2.42549	0.288584	8.40478	4.29e-17	1.62e-15	323.99	320.008	179.526	126.928	216.325	1168.5	1024.64	1573.62
397	Soga1	3082.04	-1.30434	0.155304	-8.3986	4.52e-17	1.7e-15	4042.14	3869.52	3909.76	4288.85	3740.64	1999.2	1386.47	1419.72
398	Pbxip1	2397.7	-1.93647	0.2306	-8.39752	4.56e-17	1.72e-15	4508.68	3509	2757.04	2375.64	3431.61	1119.69	625.485	854.448
399	Zmynd15	498.621	2.79831	0.333897	8.38077	5.26e-17	1.97e-15	314.078	116.262	92.8481	113.663	143.976	889.271	1006	1312.87
400	Klrd1	105.973	-4.04122	0.483174	-8.3639	6.07e-17	2.27e-15	183.757	130.019	225.539	135.027	143.286	14.259	2.65893	13.2356
401	Gimap6	887.544	-1.62577	0.194429	-8.36175	6.18e-17	2.31e-15	1231.92	1226.76	1116.16	978.229	1402.23	479.738	361.181	304.133
402	Cyp4f18	126.006	2.61701	0.314066	8.33268	7.9e-17	2.94e-15	39.3583	42.2708	45.808	42.7765	46.0574	372.517	202.756	216.507
403	B3galnt1	2977.72	1.14027	0.136935	8.3271	8.28e-17	3.08e-15	2396.37	2091.08	1828.17	2074.44	1865.46	4308.74	4467.36	4790.18
404	Tom1l1	779.457	-1.7717	0.213366	-8.30357	1.01e-16	3.75e-15	1106.19	1067.7	1113.65	1001.05	1030.62	361.183	373.339	181.918
405	Ppm1l	1152.85	-1.60204	0.193026	-8.29962	1.04e-16	3.86e-15	1620.81	1526.41	1974.16	1292.99	1295.58	471.038	596.13	445.71
406	Dyrk4	216.536	-2.5283	0.305168	-8.28496	1.18e-16	4.36e-15	392.429	390.917	285.995	222.759	285.616	63.4968	55.4694	35.6088
407	Gpr84	2338.4	-1.57057	0.189633	-8.28212	1.21e-16	4.45e-15	3488.33	3399.43	2977.68	2467.93	3220.32	1214.82	756.824	1181.87
408	1700017B05Rik	7940.1	-1.54741	0.187293	-8.26198	1.43e-16	5.26e-15	14234.7	10931.2	9384.8	8370.22	9767.77	3552.27	3031.8	4248.08
409	Arsg	1128.51	-1.31734	0.159749	-8.24637	1.63e-16	5.98e-15	1366.1	1517.63	1535.37	1266.14	1581.78	625.326	498.584	637.132
410	Foxn2	683.714	1.50566	0.182834	8.23508	1.79e-16	6.55e-15	419.747	473.263	332.742	382.822	408.861	1117.3	984.67	1350.31
411	Thbd	157.404	4.2326	0.514012	8.23443	1.8e-16	6.57e-15	9.32457	41.7997	26.5536	18.9358	4.91383	578.784	336.228	242.69
412	H2-Q5	109.513	3.15508	0.384174	8.21264	2.16e-16	7.87e-15	40.5101	29.9853	22.7366	15.1181	28.6482	230.608	162.457	346.038
413	Cxxc5	1515.11	-1.66803	0.203293	-8.20507	2.3e-16	8.36e-15	2494.6	2256.73	1853.18	1717.1	1876.58	822.342	482.05	618.278
414	Mphosph9	353.302	-1.85844	0.226587	-8.20189	2.37e-16	8.56e-15	421.741	500.838	397.421	608.04	496.947	112.654	153.244	135.532
415	Fth1	29038.8	1.22338	0.149235	8.19769	2.45e-16	8.84e-15	17060.5	19312.3	16586.2	24307.8	19486.6	44923.9	42838.4	47794.8
416	Pml	1051.81	1.61196	0.196715	8.19441	2.52e-16	9.07e-15	586.997	426.29	648.37	611.221	702.98	2166.53	1712.66	1559.44
417	Tjp1	1179.45	-1.61467	0.197068	-8.19347	2.54e-16	9.12e-15	1487.51	1835.92	1575.73	1467.87	1530.46	696.058	422.366	419.708
418	6030468B19Rik	251.156	-2.97188	0.363161	-8.18335	2.76e-16	9.89e-15	410.578	437.351	303.603	301.464	405.272	60.7946	17.9895	72.1987
419	Ak1	1264.42	-2.01496	0.246285	-8.1814	2.81e-16	1e-14	2319.06	1658.42	1576.78	1468.26	1775.73	555.062	255.294	506.752
420	Ucp2	8905.44	1.27059	0.155708	8.16012	3.35e-16	1.19e-14	5729.35	5994.26	5457.53	6908.46	5007.07	13693.9	11876.1	16576.9
421	Ptger4	184.17	3.89421	0.477248	8.15973	3.36e-16	1.19e-14	9.07168	10.9663	25.6203	54.334	47.4331	351.204	377.363	597.367
422	Nckap5l	995.794	-1.80862	0.221817	-8.15365	3.53e-16	1.25e-14	1619.59	1460.91	1273.38	1376.58	1088.96	480.822	428.137	237.973
423	Mef2a	8596.27	-0.997787	0.122576	-8.14015	3.95e-16	1.4e-14	11762.2	10722	10429.8	10237.5	9736.37	5791.71	4952.85	5137.62
424	Cpne2	158.116	3.44432	0.423359	8.13569	4.1e-16	1.45e-14	35.6628	25.6906	11.1944	47.8031	48.7956	512.056	285.464	298.261
425	Susd3	6426.71	-1.21834	0.149836	-8.13117	4.25e-16	1.5e-14	8162.05	8943.71	7367.9	7359.49	9056.74	4141.13	3383.29	2999.32
426	Kpna3	1861.61	-1.07617	0.132491	-8.12257	4.56e-16	1.6e-14	2312.86	2508.27	2284.56	2432.46	2053.77	1040.17	1145.29	1115.5
427	Camk2n1	212.196	-2.5456	0.313715	-8.11436	4.88e-16	1.71e-14	318.464	241.523	361.578	298.685	304.253	45.8748	35.4497	91.7417
428	Fnbp1	6622.73	1.05586	0.130145	8.11296	4.94e-16	1.73e-14	5251.09	4559.04	4360.21	5113.05	4300.23	10736.9	9340.61	9320.75
429	Rapgef5	956.862	-2.69016	0.33168	-8.1107	5.03e-16	1.76e-14	970.55	1126.36	1475.49	1806.9	1642.66	294.459	274.368	64.103
430	Sall3	868.443	-2.37882	0.293869	-8.09484	5.73e-16	2e-14	1101.25	1239.72	1266.6	936.106	1677.2	316.635	113.435	296.593
431	Mrc2	692.614	-1.97831	0.244429	-8.09357	5.79e-16	2.01e-14	973.341	906.223	1012.49	1331.29	585.4	226.29	258.41	247.468
432	Fam20c	306.97	2.46985	0.305288	8.09023	5.96e-16	2.06e-14	177.975	81.733	116.095	80.301	110.827	547.93	467.94	872.96
433	Tanc2	7083.76	-1.16123	0.143584	-8.08749	6.09e-16	2.11e-14	8596.53	7824.18	8131.25	10660.5	9467.27	4246.56	3643.4	4100.38
434	Col27a1	1700.35	-2.22703	0.275578	-8.08132	6.41e-16	2.21e-14	1865.18	2774.31	2049.74	2547.08	2836.2	826.34	425.951	278.011
435	Cd37	4558.07	-1.22992	0.152463	-8.06703	7.2e-16	2.48e-14	5877.63	6579.79	5602.72	5560.93	5399.92	2650.42	1966.09	2827.08
436	Mdfic	181.026	2.83023	0.350845	8.0669	7.21e-16	2.48e-14	37.1589	66.37	91.1365	51.1243	30.0911	382.093	325.18	465.054
437	Pirb	1340.51	1.5048	0.18655	8.0665	7.23e-16	2.48e-14	881.512	797.298	843.878	654.584	797.145	2924.02	1943.58	1882.06
438	Rgs1	379.575	-2.09223	0.259772	-8.0541	8.01e-16	2.74e-14	397.941	665.76	397.201	683.272	518.65	129.899	122.866	121.01
439	Rps28	3575.98	1.43535	0.178366	8.04719	8.47e-16	2.89e-14	1805	2290.31	1956.34	2880.65	1970.24	5868.04	5104.67	6732.59
440	Tmem173	6993.66	-1.72134	0.214137	-8.03849	9.1e-16	3.1e-14	8698.45	10049.4	9004.79	8394.52	11212.8	3853.03	2991.82	1744.51
441	Rpl36	2081.84	1.36937	0.17043	8.03481	9.37e-16	3.18e-14	1148.02	1472.47	1224.91	1435.18	1241.35	3498.54	2627.31	4006.95
442	Syngr1	4854.91	-1.15308	0.143832	-8.01683	1.09e-15	3.68e-14	6331.58	6100.98	5679.19	5991.22	6472.11	3047.74	2207.37	3009.07
443	Slc39a12	335.117	-2.14403	0.26768	-8.00969	1.15e-15	3.89e-14	457.885	600.106	566.806	382.042	361.428	133.557	100.333	78.7768
444	Abi3	5115.24	-1.60938	0.201079	-8.0037	1.21e-15	4.07e-14	8158.01	7413.81	5666.48	5748.79	7207.98	2858.73	1576.15	2292.01
445	Baiap2	442.979	1.99708	0.249768	7.99575	1.29e-15	4.33e-14	226.253	178.408	183.867	288.582	171.327	1104.52	657.556	733.319
446	Tmem2	443.018	2.17061	0.271777	7.98674	1.39e-15	4.65e-14	188.506	146.41	236.556	153.603	226.385	712.506	617.826	1262.35
447	Zfp691	1172.82	-1.66976	0.209173	-7.9827	1.43e-15	4.8e-14	1759.51	1815.02	1536.03	1246.62	1528.73	589.799	343.835	562.984
448	Egr1	261.414	3.30817	0.414747	7.97636	1.51e-15	5.04e-14	27.5755	65.7869	29.2397	124.019	54.1658	818.7	450.527	521.299
449	Adcy8	142.104	-9.791	1.22842	-7.97038	1.58e-15	5.28e-14	140.035	265.941	264.35	161.047	305.455	0	0	0
450	Gm28035	685.42	-1.52143	0.190978	-7.9665	1.63e-15	5.43e-14	890.033	896.12	820.307	793.707	1130.9	349.918	267.536	334.842
451	Gm8995	1876.5	1.36395	0.171439	7.95591	1.78e-15	5.91e-14	1487.93	1173.51	950.108	1215.24	1082.32	3405.83	3019.09	2677.94
452	Chd9	1315.2	-1.13754	0.14308	-7.95043	1.86e-15	6.16e-14	1832.06	1644.15	1659.52	1651.13	1472.61	774.114	682.23	805.765
453	Npc1	3119.01	-1.25319	0.157905	-7.93634	2.08e-15	6.89e-14	4639.55	4586.4	3527.98	3842.17	3334.13	1745.31	1529.99	1746.55
454	Ccdc162	128.322	-3.229	0.407411	-7.92564	2.27e-15	7.49e-14	221.955	244.711	174.137	154.783	163.152	12.1721	14.0767	41.5891
455	Apoc2	38.8665	7.22959	0.912309	7.92449	2.29e-15	7.54e-14	0	0	0.90666	3.31228	0	126	97.0975	83.6154
456	Tmem263	369.754	-2.15384	0.272187	-7.91312	2.51e-15	8.25e-14	459.542	466.327	624.909	511.362	527.137	72.1221	113.705	182.926
457	Snap23	2538.21	0.991564	0.125453	7.90389	2.7e-15	8.86e-14	1868.55	2032.79	1794.21	1716.5	1838.42	3645.62	3424.5	3985.13
458	Adora3	2716.76	-1.88459	0.238795	-7.89209	2.97e-15	9.72e-14	3749.91	4278.48	3684.74	2797.18	4165.47	1049.75	590.131	1418.46
459	Snx8	960.932	2.14025	0.271961	7.86968	3.56e-15	1.16e-13	604.273	407.891	522.771	298.792	275.535	2087.88	1281.45	2208.86
460	Pag1	7444.22	-1.21888	0.154949	-7.86633	3.65e-15	1.19e-13	10923.9	8779.67	8678.21	9801.63	9134.69	4082.91	3300.69	4852
461	Clcf1	807.114	-2.27539	0.289279	-7.8657	3.67e-15	1.19e-13	1420.43	1163.53	986.241	951.537	1235.02	394.059	159.738	146.357
462	Glrp1	189.504	-2.63118	0.334625	-7.86309	3.75e-15	1.22e-13	311.137	315.754	223.171	314.821	210.496	25.3036	52.6522	62.6969
463	Rara	106.896	3.67771	0.468053	7.85745	3.92e-15	1.27e-13	5.28714	17.9378	44.2694	12.678	21.4579	293.386	214.897	245.257
464	Ifit2	383.818	1.93854	0.246966	7.84941	4.18e-15	1.35e-13	207.815	216.831	175.606	113.864	215.634	843.153	601.604	696.038
465	Cd83	1659.62	2.34933	0.299707	7.83877	4.55e-15	1.47e-13	741.236	561.658	654.306	556.93	751.351	2460.51	1711.23	5839.71
466	Commd8	1645.11	-1.27818	0.163177	-7.83309	4.76e-15	1.53e-13	2431.25	2314.6	1694.18	1986.72	2134.9	883.701	943.172	772.379
467	Adam33	149.781	2.99538	0.382801	7.8249	5.08e-15	1.63e-13	32.8174	40.9963	14.6173	62.4356	56.1764	365.1	342.278	283.828
468	Plcl2	1146.44	-1.56487	0.200135	-7.81909	5.32e-15	1.7e-13	1712.08	1349.35	1419.21	1649.27	1508.41	695.539	427.113	410.508
469	Ccnd2	169.365	3.34684	0.428816	7.80483	5.96e-15	1.9e-13	19.9963	23.3313	19.057	53.682	72.851	353.102	340.402	472.498
470	Mtmr11	210.804	2.25554	0.28925	7.79789	6.3e-15	2.01e-13	110.208	79.4196	77.2603	57.9407	108.167	360.272	346.005	547.157
471	Gpd1	308.719	-2.10631	0.270405	-7.78945	6.73e-15	2.14e-13	488.307	384.13	486.217	384.999	411.142	111.617	62.1236	141.22
472	Gpi1	2988.93	1.04809	0.134603	7.78649	6.89e-15	2.19e-13	2366.69	2167.53	1791.51	2130.27	2218.28	4684.12	4213.84	4339.24
473	Fabp5	102.037	2.87664	0.369528	7.78464	6.99e-15	2.21e-13	33.7397	33.0388	13.8314	29.9373	40.5007	210.585	252.581	202.079
474	Cat	2345.87	0.9852	0.126637	7.77969	7.27e-15	2.3e-13	1719.62	1846.66	1576.67	1705.9	1727.29	3663.54	3093.85	3433.38
475	Galnt6	422.221	2.57097	0.330693	7.77448	7.58e-15	2.39e-13	217.07	199.785	131.937	64.7763	125.29	618.88	945.821	1074.21
476	Coro7	3354.31	1.02778	0.132326	7.76706	8.03e-15	2.53e-13	2065.73	2475.53	2316.33	2559.9	2654.33	5244.69	4816.76	4701.21
477	Mnda	465.236	4.47955	0.576865	7.76533	8.14e-15	2.56e-13	38.5441	25.0054	23.3341	57.2236	114.112	1471.54	1050.86	941.275
478	Tnfrsf21	6526.95	-1.36474	0.17582	-7.76218	8.35e-15	2.62e-13	11218.2	8382.46	7570.19	7155.94	8015.6	3586.66	2723.23	3563.25
479	Mmp28	110.511	-3.40908	0.439711	-7.75301	8.97e-15	2.81e-13	188.601	186.001	197.16	119.045	151.231	28.5499	13.4986	0
480	Asph	5794.18	-1.52165	0.19628	-7.75244	9.01e-15	2.81e-13	8628.69	7836.24	7433.5	7115.2	7299.16	2309.54	1950.74	3780.41
481	Pid1	4082.25	1.03108	0.133048	7.74968	9.21e-15	2.87e-13	3164.54	2651.13	2855.57	3121.43	2890.94	6585.31	6177.93	5211.18
482	Plcg2	4414.69	-1.50558	0.194415	-7.74417	9.62e-15	2.99e-13	7626.74	6051.3	4821.26	4643.38	6020.2	2537.1	1735.66	1881.86
483	Pilrb2	72.8043	5.12137	0.661747	7.73916	1e-14	3.1e-13	10.6372	0	10.0028	6.02458	1.86074	174.456	246.55	132.902
484	Ciita	188.543	3.35501	0.434172	7.72737	1.1e-14	3.4e-13	34.6583	22.7895	24.8598	72.5838	58.1728	653.325	437.838	204.116
485	Mgll	1128.83	-1.25631	0.16266	-7.72351	1.13e-14	3.5e-13	1505.92	1386.75	1289.99	1678	1372.99	688.083	574.78	534.1
486	Tmem221	497.877	1.71414	0.222098	7.71794	1.18e-14	3.64e-13	334.755	253.939	302.813	218.226	238.69	1112.42	833.839	688.327
487	Abca14	85.1491	4.17824	0.541491	7.71618	1.2e-14	3.69e-13	18.4876	2.89213	11.309	7.72555	19.1137	197.104	134.959	289.602
488	Cd68	25264.6	1.1733	0.152178	7.71002	1.26e-14	3.86e-13	17482.5	19281.3	16164.3	14920.4	18030.3	39267.4	31410.8	45559.7
489	Myh10	349.143	2.01844	0.262013	7.70359	1.32e-14	4.05e-13	213.889	98.7761	163.232	143.712	196.922	659.989	584.166	732.457
490	Itgae	220.799	-3.31711	0.430897	-7.69816	1.38e-14	4.22e-13	515.278	249.204	264.167	243.469	405.876	44.097	44.3	0
491	Pnp	4351.47	-1.08913	0.141601	-7.69154	1.45e-14	4.43e-13	5760.71	5380.97	4974.42	5309.15	5731.53	2994.77	2174.25	2486.01
492	Sepp1	60537.9	0.947126	0.123324	7.67996	1.59e-14	4.84e-13	47467.3	46676.9	40474.4	47258.3	42664.3	91935.5	76744.2	91082.2
493	Nfkbiz	481.076	1.74482	0.227338	7.67501	1.65e-14	5.03e-13	336.673	270.079	232.856	170.973	267.91	963.848	741.814	864.452
494	Irf7	360.775	2.43244	0.316947	7.67462	1.66e-14	5.03e-13	165.364	202.244	129.11	85.1915	100.055	1064.72	584.925	554.586
495	Ngfrap1	236.381	1.89235	0.246758	7.66885	1.74e-14	5.24e-13	91.2609	92.479	130.63	138.297	134.062	504.185	392.568	407.569
496	Ski	2484.26	-1.38105	0.180087	-7.6688	1.74e-14	5.24e-13	4080.12	3144.71	2616.26	3372.98	2948.25	1490.66	1108.14	1112.96
497	Mx1	327.812	2.14125	0.279266	7.66741	1.75e-14	5.29e-13	82.7394	155.599	169.029	180.087	130.297	801.511	477.039	626.197
498	Zbtb18	341.396	-2.23796	0.292091	-7.66186	1.83e-14	5.51e-13	277.392	475.368	603.008	641.427	424.538	115.977	86.1989	107.264
499	Cmtm8	308.538	-2.11385	0.275913	-7.66128	1.84e-14	5.53e-13	362.875	435.187	515.009	464.977	373.277	70.7736	86.6898	159.518
500	Rnase4	22189.5	-0.970868	0.126792	-7.65715	1.9e-14	5.69e-13	27382.6	27285.9	26332	25766	29127.6	14539.9	11792.8	15289.2
501	Ctss	111210	-0.987491	0.128984	-7.65592	1.92e-14	5.74e-13	138389	146511	123227	131212	143647	74946.9	59116.2	72628.4
502	Rnasel	1210.65	1.03815	0.135737	7.64824	2.04e-14	6.08e-13	974.8	856.089	828.382	863.306	824.994	1833.71	1858.14	1645.82
503	Tppp	2178.3	-1.40925	0.184269	-7.64779	2.04e-14	6.09e-13	3024.02	3191.76	2973.55	2018.52	3017.97	1264.27	972.914	963.406
504	Rpl37a	4319.72	1.3386	0.175172	7.64164	2.14e-14	6.37e-13	2435.91	3041.01	2439.28	3493.81	2312.37	7156.86	5862.61	7815.92
505	Ankrd10	902.114	-1.38236	0.180959	-7.63906	2.19e-14	6.49e-13	1295.65	1250.53	1221.03	1226.55	870.954	478.623	402.592	470.984
506	Smpdl3b	1004.78	1.55115	0.203283	7.63048	2.34e-14	6.92e-13	783.24	666.249	492.88	510.165	467.843	1886.6	1737.09	1494.2
507	Ptgs1	19930.8	-1.16239	0.152431	-7.62565	2.43e-14	7.16e-13	30108.2	26658.4	22894.6	20644.4	25441.9	12687	10421.3	10590.7
508	Sh3bp5	1093.32	1.49811	0.19645	7.62587	2.42e-14	7.16e-13	856.363	543.41	603.544	616.804	622.012	1744.11	1509.06	2251.3
509	Ifit3	622.357	2.05663	0.270225	7.6108	2.72e-14	8.02e-13	244.529	269.641	393.425	328.396	189.86	1640.27	843.503	1069.23
510	Rps29	10100.4	1.38373	0.181882	7.60787	2.79e-14	8.18e-13	5042.3	6604.28	5950.95	8565.01	5327.31	16318.6	14654.8	18339.9
511	Rps19	4382.68	1.36778	0.179814	7.60665	2.81e-14	8.24e-13	2609.45	2954.67	2252.35	3346.88	2587.03	7541.48	5415.95	8353.65
512	Chst1	208.014	-2.27923	0.299699	-7.60505	2.85e-14	8.33e-13	238.262	219.417	401.385	357.685	264.991	59.2539	63.8209	59.2996
513	Hfe	6725.67	1.13546	0.149352	7.60254	2.9e-14	8.48e-13	5322.14	5101.52	4441.98	3983.63	4354.35	10666.7	8683.91	11251.1
514	Rpl38	1408.37	1.52349	0.200727	7.58984	3.2e-14	9.33e-13	719.149	854.387	822.835	1057.23	673.837	2127.38	1957.05	3055.09
515	Treml2	245.673	-2.79802	0.369043	-7.58183	3.41e-14	9.91e-13	235.807	414.707	494.443	410.441	260.293	34.8095	83.0229	31.8614
516	Prkacb	2414.1	1.1734	0.15488	7.57616	3.56e-14	1.03e-12	2087.33	1483.16	1632.08	1546.95	1458.83	3692.67	3520.96	3890.8
517	Fbrsl1	1031.53	-1.62578	0.214875	-7.56616	3.84e-14	1.11e-12	1223.42	1392.26	1474.08	1654.42	1164.05	581.121	315.362	447.509
518	Lpcat1	2591.17	-0.964296	0.12747	-7.56486	3.88e-14	1.12e-12	3086.22	3239.26	3045.71	3375.63	3100.36	1739.47	1436.87	1705.85
519	Slmap	1837.38	-1.48616	0.196492	-7.56348	3.92e-14	1.13e-12	3010.15	2816.54	2072.84	1910.1	2282.97	885.566	698.201	1022.64
520	Zc3h12d	126.618	2.07104	0.274529	7.54398	4.56e-14	1.31e-12	63.9507	42.8807	60.5554	61.7558	60.1498	241.157	247.427	235.07
521	Mtus1	8620.85	-1.29665	0.172142	-7.53243	4.98e-14	1.43e-12	12627.9	11735.9	9805.83	9422.25	11859.4	5647.75	4256.67	3611.1
522	Map4k4	896.107	-1.45502	0.193348	-7.5254	5.26e-14	1.51e-12	1398.12	1131.77	1003.58	1297.13	1056	536.755	368.984	376.511
523	Fcgrt	2258.2	1.72353	0.229166	7.52087	5.44e-14	1.56e-12	1614.8	1229.64	789.251	996.018	1427.26	4292.77	3053.94	4661.92
524	D15Ertd621e	1777.43	-1.63377	0.217249	-7.52028	5.47e-14	1.56e-12	2147.29	2199.86	2377.01	2866.43	2346.21	1060.48	738.218	483.905
525	Bmf	1450.46	-1.42699	0.190054	-7.50832	5.99e-14	1.71e-12	2624.84	1817.9	1521.54	1785.7	1736.97	731.697	669.778	715.235
526	Fam72a	336.103	-1.63495	0.21786	-7.5046	6.16e-14	1.75e-12	549.382	477.038	408.532	443.533	370.773	134.304	144.03	161.233
527	Gp9	758.616	-1.90828	0.254557	-7.49647	6.56e-14	1.86e-12	1229.31	1239.26	973.93	850.012	926.751	309.377	162.654	377.632
528	Myo1b	1289.82	-1.52842	0.204392	-7.47789	7.55e-14	2.14e-12	1762.36	1658.77	1497.47	2000.67	1637.24	539.27	804.414	418.353
529	Lrrc25	3141.19	1.46853	0.196426	7.47625	7.65e-14	2.17e-12	2310.67	2127.81	1745.76	1496.44	1762.19	6111.95	3776.61	5798.13
530	Cep152	862.165	-1.29772	0.174134	-7.45241	9.16e-14	2.59e-12	991.716	1229.59	1214.92	1040.2	1084.07	471.205	513.555	352.062
531	Efemp2	376.288	1.67547	0.225028	7.44562	9.65e-14	2.72e-12	223.237	273.293	185.779	150.108	199.878	652.977	712.412	612.618
532	Ccdc109b	112.071	4.03157	0.541923	7.43937	1.01e-13	2.85e-12	35.5763	9.1524	1.085	17.2354	20.797	267.93	324.001	220.79
533	Apobec2	61.4683	-3.56589	0.479454	-7.4374	1.03e-13	2.89e-12	84.9559	96.8297	88.5419	104.826	95.3907	8.38862	8.9467	3.86672
534	Rpl10	8367.7	0.957081	0.128707	7.43614	1.04e-13	2.91e-12	5776.96	6808.87	5683.76	7005.36	5648.85	12132.1	12167.3	11718.4
535	Nme4	110.416	3.21075	0.432074	7.43103	1.08e-13	3.02e-12	8.00021	22.3839	26.824	25.4895	49.8776	287.933	206.589	256.232
536	Msrb2	966.548	-1.43613	0.193769	-7.41159	1.25e-13	3.49e-12	1252.97	1208.24	1345.25	1108.93	1401.69	537.251	335.216	542.829
537	Pecam1	919.652	-1.60944	0.217241	-7.40855	1.28e-13	3.56e-12	1226.83	1381.33	1394.77	1035.26	1084.82	292.452	376.833	564.92
538	Tpst1	406.574	1.42512	0.192432	7.40582	1.3e-13	3.63e-12	227.003	237.889	249.436	315.149	219.469	674.248	708.241	621.158
539	Tnfsf9	130.065	2.21557	0.299551	7.39628	1.4e-13	3.89e-12	71.6341	38.6372	58.5415	43.4317	63.7695	246.097	260.682	257.729
540	Gna15	5765.25	-1.33756	0.181221	-7.38078	1.57e-13	4.36e-12	8865.34	7623.57	7101.09	5800.22	7880.79	3561.79	2277.53	3011.64
541	Ets2	974.986	1.95359	0.264962	7.37309	1.67e-13	4.62e-12	803.31	339.266	362.566	456.33	390.511	2117.13	1563.09	1767.68
542	2022-09-08	988.51	1.21424	0.164699	7.37249	1.67e-13	4.63e-12	732.574	565.433	613.408	749.313	654.708	1689.33	1583.92	1319.4
543	St6gal1	1831.29	1.13329	0.153915	7.36308	1.8e-13	4.96e-12	1125.59	1391.74	1269.29	1206.65	1321.73	2936.69	2269.93	3128.69
544	Pde7b	73.705	3.14003	0.426821	7.35678	1.88e-13	5.19e-12	8.53013	33.4291	19.7654	16.3967	12.8939	166.864	167.038	164.722
545	Gm2316	24.0684	8.69598	1.18335	7.34861	2e-13	5.5e-12	0	0	0	0	0	44.3825	38.153	110.012
546	Ptger3	103.925	-3.56252	0.485944	-7.33114	2.28e-13	6.26e-12	203.5	137.634	129.02	153.882	173.219	26.4099	7.73486	0
547	Gm2000	1656.41	1.02012	0.139419	7.31688	2.54e-13	6.95e-12	1174.81	1292.96	1041.45	1236.16	1226.34	2510.23	2170.23	2599.14
548	Timd4	37.7395	4.22675	0.578271	7.30929	2.69e-13	7.34e-12	5.32074	2.17333	8.32087	4.0052	4.94426	77.7026	73.6387	125.81
549	Pxdc1	628.828	1.99666	0.273917	7.28929	3.12e-13	8.5e-12	262.581	187.586	290.028	498.625	243.867	1109.78	1098.87	1339.28
550	Pecr	737.249	-1.33355	0.183002	-7.2871	3.17e-13	8.62e-12	1061.69	932.606	822.453	846.25	1103.64	434.206	335.46	361.69
551	Zfyve28	218.008	-2.50146	0.343528	-7.28167	3.3e-13	8.96e-12	428.579	329.989	271.272	270.439	285.925	53.3626	84.8466	19.6486
552	Hip1	908.692	5.53925	0.761649	7.27271	3.52e-13	9.56e-12	54.6675	62.9319	4.14118	40.7312	88.6898	3063.45	2149.93	1804.99
553	Dusp1	264.108	2.85007	0.392154	7.26774	3.66e-13	9.9e-12	18.8361	75.9538	106.081	98.6458	94.4192	453.324	509.01	756.59
554	Rrp1b	428.768	-1.6375	0.225394	-7.26506	3.73e-13	1.01e-11	498.59	733.895	506.805	493.548	631.702	171.526	162.634	231.444
555	Ctnnal1	373.461	-1.87254	0.257848	-7.2622	3.81e-13	1.03e-11	581.027	619.633	373.349	528.763	462.126	103.581	175.803	143.405
556	Rps2	5520.93	1.08496	0.149411	7.2616	3.83e-13	1.03e-11	3854.01	3912.13	3325.26	4411.16	3921.77	8446.98	6855.59	9440.5
557	Stard8	3405.07	1.54249	0.212507	7.25855	3.91e-13	1.05e-11	2868.13	2101.16	1854.97	1306.6	1787.31	6235.83	5667.32	5419.21
558	Siglecf	602.557	-1.77282	0.24428	-7.25731	3.95e-13	1.06e-11	749.722	896.377	852.345	682.647	906.78	277.223	144.157	311.207
559	Tes	605.699	-1.24395	0.171443	-7.2558	3.99e-13	1.07e-11	669.043	852.437	744.9	737.625	858.112	302.872	338.99	341.612
560	Ccni	1963.17	-1.11597	0.153853	-7.25345	4.06e-13	1.09e-11	2389.29	2250.93	2530.57	2971.99	2148.55	1112.75	1053.24	1248.05
561	Rps18	2489.11	1.44113	0.198867	7.24668	4.27e-13	1.14e-11	1277.88	1564.37	1405.75	2084.48	1235.99	4083.89	3361.17	4899.37
562	Dennd2d	202.962	2.57466	0.355776	7.23674	4.6e-13	1.22e-11	45.4556	54.989	138.469	52.9439	63.2072	472.552	400.262	395.818
563	Ykt6	2333.51	-1.18089	0.163235	-7.2343	4.68e-13	1.24e-11	3404.22	3157.11	2632.02	2963.53	2586.86	1232.94	1120.5	1570.92
564	B4galt4	2366.9	-0.855231	0.118483	-7.21817	5.27e-13	1.4e-11	2811.46	2977.99	2761.26	2714.88	2962.05	1580.11	1643.66	1483.76
565	Gramd1a	5196.34	-1.08372	0.150166	-7.21676	5.32e-13	1.41e-11	6892.67	5350.03	6995.49	6769.68	6371.2	2733.01	2846.27	3612.34
566	Gimap9	172.969	-2.39898	0.333156	-7.20077	5.99e-13	1.58e-11	280.459	188.676	246.777	235.932	297.091	70.7033	35.8002	28.3176
567	Macf1	5402.26	-1.18423	0.164469	-7.20031	6.01e-13	1.59e-11	6772.03	6587.21	6008.92	7552.64	7246.19	3044.29	2318.73	3688.06
568	Lrrc3	9033.98	-1.33612	0.185819	-7.19042	6.46e-13	1.7e-11	14676.5	12666	10476.1	9965.91	10620.7	5942.25	3897.58	4026.83
569	Garnl3	944.273	-1.11274	0.154834	-7.18665	6.64e-13	1.75e-11	1343.41	1064.76	1177.27	1207.61	1111.94	551.124	497.051	601.024
570	Spns3	346.053	-3.05192	0.425002	-7.18096	6.92e-13	1.82e-11	667.243	541.616	400.748	401.36	578.135	128.455	35.8035	15.0601
571	Sh2d3c	1046.28	-1.39544	0.194644	-7.16919	7.54e-13	1.98e-11	1571.45	1412.07	1324.48	1355.61	1161.78	671.101	415.797	457.941
572	Zfp275	629.542	-1.41224	0.197307	-7.15759	8.21e-13	2.15e-11	734.252	775.096	892.156	1002.8	710.299	366.118	271.705	283.915
573	Ifnar1	5015.19	1.0661	0.148971	7.15645	8.28e-13	2.16e-11	4275.37	3663.6	2857.92	3688.93	3298.15	7557.28	7216.3	7563.97
574	2510009E07Rik	1050.57	-1.19751	0.167755	-7.13847	9.44e-13	2.46e-11	1218.15	1296.99	1617.3	1336.16	1182.16	581.505	516.957	655.351
575	Ninj1	3337.57	1.38384	0.193959	7.13469	9.7e-13	2.53e-11	2697.66	2098.26	1831.09	1987.54	1784.33	4807.67	4422.66	7071.32
576	Mob3b	189.767	2.30456	0.323378	7.12652	1.03e-12	2.68e-11	112.184	71.0687	96.0575	44.6201	63.5971	417.366	427.676	285.565
577	Ebi3	1297.76	1.14018	0.160023	7.12505	1.04e-12	2.7e-11	760.761	1072.56	803.307	945.001	885.425	2120.84	1811.53	1982.64
578	Trex1	2827.03	1.10063	0.154497	7.12396	1.05e-12	2.72e-11	2176.6	2089.98	1760.86	1694.41	2170.61	4902.12	3756.1	4065.6
579	Prdx1	4631.27	0.970924	0.136639	7.10579	1.2e-12	3.09e-11	3043.11	3791.76	3067.92	3669.56	3443.17	6524.86	6131.6	7378.2
580	Rps16-ps2	711.924	1.84457	0.259605	7.10528	1.2e-12	3.1e-11	380.748	446.206	408.361	330.211	234.08	1155.05	911.219	1829.52
581	Lst1	1556.49	1.20133	0.169088	7.10477	1.21e-12	3.11e-11	961.403	1148.99	973.617	884.719	1263.04	2778.22	2159.78	2282.18
582	Tubb2a	4413.01	0.96237	0.135753	7.08915	1.35e-12	3.47e-11	3039.42	3800.33	3054.71	2987.6	3392.96	6917.16	5966.49	6145.38
583	Hlf	180.11	-3.39461	0.47972	-7.07624	1.48e-12	3.81e-11	357.129	237.005	204.658	314.853	252.711	55.5407	16.8354	2.14488
584	Rps27	6393.2	1.10461	0.156187	7.07237	1.52e-12	3.91e-11	3722.34	4569.64	4215.5	5428.72	4390.32	10274.9	8144.93	10399.2
585	Edem2	4811.48	-1.08481	0.153728	-7.05669	1.71e-12	4.37e-11	7508.26	5880.54	5403.99	5483.12	5718.26	2872.36	2500.82	3124.52
586	Iscu	2478.23	-0.932837	0.132202	-7.05615	1.71e-12	4.38e-11	3248.01	3096.44	2569.15	3130.29	3046.89	1651.86	1570.19	1512.98
587	Emr1	18925.5	1.02549	0.145343	7.0557	1.72e-12	4.38e-11	15153.6	15152.3	14379.3	11313.9	12153.9	28910.4	24879.5	29460.7
588	Ndst1	456.393	1.86063	0.264269	7.04065	1.91e-12	4.87e-11	346.587	233.862	139.211	240.611	193.491	906.865	874.041	716.479
589	Rps14	4538.94	1.21865	0.173203	7.03597	1.98e-12	5.03e-11	2913.21	3199.82	2637.62	3823.1	2573.24	7207.17	5803.53	8153.81
590	Pld2	715.557	1.10666	0.157325	7.03423	2e-12	5.09e-11	439.372	568.431	512.57	522.131	453.592	1073.67	1084.59	1070.1
591	Stx2	780.365	-1.26544	0.180076	-7.02725	2.11e-12	5.34e-11	881.339	1086.67	890.426	1166.64	980.485	431.087	467.802	338.479
592	Cd276	1064.38	-1.57832	0.224824	-7.02025	2.21e-12	5.6e-11	1891.12	1209.15	1382.73	1466.41	1122.92	410.376	383.943	648.437
593	Tpd52	1950.76	1.41844	0.20211	7.01815	2.25e-12	5.68e-11	1147.41	1129.21	1003.4	1538.88	1164.5	2966.2	2434.05	4222.47
594	Ncf1	8763.71	-1.24771	0.17799	-7.01	2.38e-12	6.01e-11	13506.6	12417.9	9723.29	10378.3	9925.88	4928.07	3593.86	5635.79
595	H2-M3	1512.5	1.20678	0.172515	6.99521	2.65e-12	6.67e-11	995.657	1198.89	1117.47	771.889	992.852	2586.05	2367.16	2070.01
596	C1ra	266.456	2.0621	0.294909	6.99232	2.7e-12	6.79e-11	89.2066	155.303	147.843	113.795	95.4047	381.275	415.754	733.064
597	Tle3	1062.18	-1.62794	0.232846	-6.99149	2.72e-12	6.82e-11	1657.38	1557.99	1380.03	1117.71	1386.27	511.264	283.987	602.808
598	Cd164	21781.9	-0.754231	0.107884	-6.99116	2.73e-12	6.83e-11	25117.1	26660.4	25395.2	26569.5	24794.1	16422	14304.7	14991.8
599	Rap2b	709.114	1.46039	0.208977	6.98829	2.78e-12	6.96e-11	381.29	406.379	403.454	456.188	482.869	1191.48	828.721	1522.53
600	Zfp704	601.251	2.17318	0.31116	6.98412	2.87e-12	7.16e-11	409.973	186.02	226.946	135.639	342.304	1090.37	970.335	1448.43
601	G430095P16Rik	58.7886	-4.15694	0.595416	-6.98158	2.92e-12	7.27e-11	133.201	68.8938	64.2306	78.1881	111.403	3.28602	7.43754	3.6695
602	Snph	238.326	-2.56183	0.367192	-6.97681	3.02e-12	7.51e-11	469.428	307.869	328.368	289.916	326.894	85.3512	25.0472	73.7354
603	Pon3	2044.13	-1.04867	0.150344	-6.97516	3.06e-12	7.59e-11	2574.96	2453.17	2567.51	2193.59	2882.77	1354.74	1055.98	1270.34
604	Optn	191.552	1.88826	0.270842	6.97179	3.13e-12	7.76e-11	128.626	78.585	102.44	72.5802	92.3714	342.484	294.28	421.045
605	Npsr1	33.8638	4.70701	0.675292	6.97032	3.16e-12	7.83e-11	0	2.43728	7.47297	4.59317	2.33314	96.2635	75.5029	82.3071
606	Mylip	5710.81	-0.854075	0.122554	-6.96894	3.19e-12	7.89e-11	7226.22	6840.65	6740.92	6313.25	7180.96	4174.64	3443.31	3766.5
607	Klf10	468.851	1.47215	0.2113	6.96707	3.24e-12	7.99e-11	327.551	280.731	254.962	210.586	332.305	869.457	654.627	820.587
608	Il2rg	214.223	1.73632	0.249319	6.96427	3.3e-12	8.12e-11	158.432	102.046	93.9445	116.938	104.427	424.952	334.588	378.454
609	Tnfsf18	34.3877	4.7465	0.681545	6.96432	3.3e-12	8.12e-11	0	4.34507	4.99191	1.00143	4.32765	53.1503	81.73	125.555
610	Sepn1	203.881	2.03552	0.292399	6.96144	3.37e-12	8.27e-11	126.949	107.307	60.9859	82.1719	93.98	454.771	286.711	418.176
611	Cmtm6	30318.8	-1.01052	0.145299	-6.95476	3.53e-12	8.66e-11	45776.2	37487.5	35741.3	31567.1	36321.5	20290.9	17082.6	18283.6
612	Crtap	847.604	1.23957	0.17844	6.94669	3.74e-12	9.15e-11	528.278	561.76	466.879	702.853	551.592	1484.08	1329.25	1156.14
613	Kcnj9	210.148	2.54134	0.367637	6.91262	4.76e-12	1.16e-10	115.018	49.7762	92.6264	48.9142	73.3951	618.339	453.603	229.513
614	Tmx4	2250.82	-1.13632	0.164483	-6.90845	4.9e-12	1.2e-10	3210.21	2510.23	3007.94	3117.68	2309.65	1212.51	1472.05	1166.28
615	Specc1	1613.64	-1.25567	0.181871	-6.90416	5.05e-12	1.23e-10	2237.56	2432.62	1803.9	1630.46	2198.99	886.857	721.311	997.402
616	Il10rb	7494.31	0.90514	0.131337	6.89172	5.51e-12	1.34e-10	6441.39	5647.88	4829.67	5335.17	5976.87	10757.2	10101.6	10864.8
617	Atp8b4	142.601	2.74772	0.398972	6.88698	5.7e-12	1.38e-10	40.983	29.7123	38.9433	63.4771	50.0666	141.062	298.092	478.467
618	Rin3	1236.56	-0.897	0.130713	-6.86236	6.77e-12	1.64e-10	1567.78	1472.08	1543.73	1454.75	1455.33	842.963	817.666	738.174
619	Smap2	1730.53	-1.08589	0.158321	-6.85879	6.94e-12	1.68e-10	2108.45	2027.59	2060.44	2474.09	2105.37	1023.61	836.477	1208.19
620	Eepd1	1303.93	1.83596	0.267853	6.85436	7.16e-12	1.73e-10	815.525	603.28	798.025	633.479	463.342	1699.12	1724.19	3694.5
621	Usp24	1531.03	-1.10982	0.162235	-6.84084	7.87e-12	1.9e-10	2255.69	1800.36	1731.14	1763.18	2020.28	762.584	877.855	1037.15
622	Cask	1643.23	-1.23299	0.180284	-6.83915	7.97e-12	1.92e-10	2492.89	1989.6	2217.4	1702.05	2076.19	1094.94	753.386	819.369
623	Usp49	237.027	2.5794	0.377964	6.82447	8.82e-12	2.12e-10	41.5325	67.2399	143.242	106.586	55.5594	546.694	333.638	601.724
624	Wscd1	304.758	-1.48284	0.217732	-6.81037	9.73e-12	2.34e-10	379.474	458.572	386.771	386.202	399.867	122.887	174.253	130.035
625	Lgals9	6043.99	-0.989448	0.14544	-6.80315	1.02e-11	2.45e-10	8074.29	7375.94	7192.31	6875.59	7609.49	4346.68	3029.83	3847.77
626	Nrip1	2879.23	-1.03357	0.152092	-6.79573	1.08e-11	2.58e-10	3711.9	3766.93	3168.23	3856.8	3304.36	1983.94	1431.25	1810.44
627	Plk2	196.065	3.01167	0.443847	6.78538	1.16e-11	2.77e-10	90.5236	39.1012	25.7558	20.9733	93.623	475.914	490.223	332.407
628	Smad7	225.987	-1.89589	0.279551	-6.78189	1.19e-11	2.83e-10	297.565	386.5	218.174	355.442	303.684	100.875	76.9082	68.745
629	Ephb3	144.662	-2.54987	0.376854	-6.7662	1.32e-11	3.15e-10	318.444	188.554	235.822	178.337	135.903	37.963	41.9586	20.3188
630	Usp18	333.215	1.61909	0.239584	6.75793	1.4e-11	3.33e-10	174.106	253.865	178.352	151.61	181.12	716.73	533.585	476.353
631	Med22	3267.5	-1.07088	0.158518	-6.75553	1.42e-11	3.38e-10	4888.49	4600.26	3731.63	3578.58	3535.33	2096.14	1793.27	1916.28
632	Ctsl	13839.1	-0.956121	0.141576	-6.75343	1.44e-11	3.42e-10	15587.9	17639.5	15156.4	18354.1	17800.8	8559.37	7455.01	10159.3
633	Mfng	2979.4	-1.15605	0.17141	-6.74436	1.54e-11	3.63e-10	4086.85	4262.12	3065.07	3465.25	3909.47	2073.39	1490.47	1482.54
634	Phf11b	448.413	1.33002	0.197199	6.74456	1.53e-11	3.63e-10	308.879	312.477	281.34	251.019	273.349	816.864	558.923	784.45
635	Ablim1	568.318	-1.28094	0.190005	-6.74157	1.57e-11	3.7e-10	806.472	786.529	633.713	603.233	809.55	309.015	269.813	328.221
636	Cyp4f16	440.25	2.08929	0.30997	6.74029	1.58e-11	3.72e-10	251.43	231.957	139.97	110.127	261.372	977.878	1007.23	542.039
637	Nenf	644.945	1.02641	0.152275	6.74051	1.58e-11	3.72e-10	456.454	444.329	484.867	496.346	434.876	878.225	923.134	1041.33
638	Skil	4289.02	-1.08635	0.161264	-6.73649	1.62e-11	3.81e-10	5337.23	5509.7	5048.33	4883.31	5946.62	2285.67	2100.89	3200.46
639	Utp14b	151.959	2.36852	0.351982	6.72909	1.71e-11	4e-10	53.146	54.755	97.4056	53.9319	36.9444	208.707	355.301	355.478
640	Tpm4	937.762	1.31323	0.195187	6.72806	1.72e-11	4.02e-10	780.619	606.23	636.431	495.57	494.366	1680.59	1267.79	1540.5
641	Nuak1	1727.8	-1.15793	0.172188	-6.72482	1.76e-11	4.11e-10	2013.87	1927.89	2076.63	2713.7	2168.22	1162.42	860.635	899.051
642	Dip2b	3731.03	-1.12393	0.167159	-6.72376	1.77e-11	4.13e-10	5252.94	3911.99	4804.41	4792.22	4636.94	2486.39	1650.37	2313.02
643	Oasl1	89.3515	2.77448	0.413025	6.71745	1.85e-11	4.31e-10	27.0263	25.8363	43.2796	29.8791	13.7902	264.623	189.507	120.871
644	Sash1	56.3545	3.87425	0.576981	6.71469	1.88e-11	4.38e-10	15.999	5.42544	12.4254	9.93698	3.05929	104.699	74.816	224.475
645	Actr3	6059.81	0.81034	0.120813	6.70738	1.98e-11	4.6e-10	5095.81	4387.43	4453.45	4832.52	4857.32	9000.19	7664.15	8187.58
646	Serinc5	440.761	1.26728	0.188961	6.70659	1.99e-11	4.62e-10	335.874	319.081	263.583	260.623	262.85	602.86	757.625	723.588
647	Psd3	302.084	2.22955	0.332454	6.70635	2e-11	4.62e-10	80.2071	83.7032	148.159	217.559	110.142	706.849	661.373	408.679
648	Pacsin1	59.637	-3.35053	0.49974	-6.70455	2.02e-11	4.67e-10	104.693	78.9999	85.0684	95.3525	88.0063	12.0479	11.2423	1.68552
649	Gab3	503.387	1.5284	0.228172	6.69846	2.11e-11	4.86e-10	323.626	306.041	353.945	175.915	313.906	877.06	804.787	871.812
650	Lpcat3	5327.65	-0.96289	0.143801	-6.69597	2.14e-11	4.94e-10	7738.62	6530.15	6148.73	5672.87	6484.44	3193.88	3087.54	3764.98
651	Kbtbd11	182.3	2.2562	0.33705	6.69395	2.17e-11	5e-10	51.5208	91.2445	41.5568	89.3422	103.22	338.549	454.112	288.853
652	H2-Q6	555.874	2.30936	0.345119	6.69149	2.21e-11	5.07e-10	234.076	392.867	119.023	145.261	223.257	711.628	1085.57	1535.31
653	Grap	2474.46	-1.11603	0.166977	-6.68369	2.33e-11	5.34e-10	3562.85	3202.87	2793.55	2622.03	3318.83	1642.53	1160.68	1492.3
654	4833439L19Rik	2838.03	-1.06887	0.159987	-6.68094	2.37e-11	5.44e-10	4163.47	3580.52	3123.38	3259.77	3516.45	1808.09	1364.27	1888.29
655	Bola2	443.537	1.25575	0.18819	6.6728	2.51e-11	5.74e-10	274.289	262.052	258.095	319.93	342.09	731.733	618.897	741.211
656	Il1rl1	483.828	1.66601	0.249737	6.67107	2.54e-11	5.8e-10	375.585	259.843	176.411	231.784	290.04	766.466	724.988	1045.51
657	Rras2	167.686	-2.19613	0.329384	-6.66738	2.6e-11	5.94e-10	228.829	212.966	316.096	213.165	222.338	40.5623	76.0356	31.4942
658	Gprasp2	619.067	-1.19721	0.179716	-6.66171	2.71e-11	6.16e-10	804.899	884.264	797.247	626.356	805.292	333.265	329.85	371.359
659	Cebpz	1258.91	-1.13566	0.170597	-6.65701	2.79e-11	6.35e-10	1794.6	1688.64	1469.95	1612.67	1362.63	838.08	731.015	573.686
660	Elk3	1577.2	-1.14851	0.172877	-6.6435	3.06e-11	6.95e-10	2196.26	1878.02	1903.87	1919.28	2037.95	1129.71	711.901	840.62
661	Fry	814.767	-2.00741	0.302211	-6.6424	3.09e-11	6.99e-10	1309.65	1652.25	1066.27	859.654	798.004	417.533	266.068	148.708
662	Klhl13	214.791	1.66703	0.251216	6.63586	3.23e-11	7.3e-10	135.967	136.615	77.6497	116.616	124.52	365.362	375.501	386.1
663	Rpl13	9138.79	0.923979	0.139273	6.63432	3.26e-11	7.37e-10	6421.51	7130.06	5975.29	8266.99	6395.57	13548.9	12387.6	12984.4
664	Ppfia4	8422.77	-1.20164	0.181262	-6.6293	3.37e-11	7.61e-10	13432.2	11840	9094.37	8434.97	10641.8	5479.09	3913.07	4546.65
665	Hmox1	907.559	1.26696	0.191198	6.62643	3.44e-11	7.75e-10	475.15	717.081	647.548	633.837	492.439	1554.59	1203.3	1536.53
666	2022-09-09	551.603	1.80929	0.273259	6.62116	3.56e-11	8.01e-10	432.01	351.641	189.236	232.554	219.144	1169.25	823.476	995.518
667	Aldh7a1	560.259	1.38759	0.209579	6.62084	3.57e-11	8.02e-10	469.732	374.679	269.294	324.49	308.407	1000.38	828.298	906.79
668	Mlec	4982.94	-1.14102	0.172513	-6.61413	3.74e-11	8.38e-10	5682.16	5755.95	7165.62	7156.1	5552.58	2682.74	2312.96	3555.37
669	Camk1	9274.76	-0.738121	0.111633	-6.61203	3.79e-11	8.49e-10	10422.8	10901.1	10140.1	11304.6	11797.3	6686.51	6327.76	6617.91
670	Med13l	1178.82	-0.862953	0.130789	-6.59806	4.17e-11	9.31e-10	1397.54	1402.28	1359.61	1389.22	1543.54	793.889	773.488	770.995
671	Tgtp2	426.762	2.39403	0.364145	6.5744	4.89e-11	1.09e-09	78.2433	318.874	173.473	159.858	90.7784	950.647	786.416	855.81
672	Anpep	43.5396	3.74704	0.572016	6.55058	5.73e-11	1.28e-09	13.9183	6.70512	2.36577	3.78937	12.2631	108.781	113.684	86.8104
673	Klhl23	417.666	-1.60773	0.245853	-6.5394	6.18e-11	1.37e-09	458.519	541.591	779.691	510.023	512.761	217.585	190.761	130.394
674	Cd36	108.195	3.20619	0.490993	6.53001	6.58e-11	1.46e-09	8.9786	20.707	25.8668	27.845	48.985	270.889	358.745	103.545
675	Ccdc93	3032.01	-0.858778	0.131607	-6.5253	6.79e-11	1.51e-09	3819.85	3944.96	3484.62	3409.05	3586.6	2193.92	2065.32	1751.74
676	Hrh1	82.5219	4.11647	0.630898	6.52477	6.81e-11	1.51e-09	11.8058	11.4501	34.5336	1.68721	6.45797	196.649	285.861	111.731
677	Myo1d	226.654	-1.98058	0.303796	-6.51944	7.06e-11	1.56e-09	431.453	317.862	320.538	250.819	259.969	65.089	111.336	56.1676
678	Sulf2	576.039	1.68162	0.258081	6.51584	7.23e-11	1.6e-09	235.162	299.749	444.03	238.862	350.726	917.097	772.513	1350.17
679	Samsn1	1808.47	-1.43716	0.220922	-6.50531	7.75e-11	1.71e-09	2391.75	2430.32	2294.14	1967.31	2746.95	1033.69	527.445	1076.16
680	Abcb4	392.484	-1.5763	0.242666	-6.49576	8.26e-11	1.82e-09	406.351	652.984	467.028	571.749	512.513	211.433	130.566	187.251
681	Foxred2	473.002	5.21061	0.802803	6.49051	8.55e-11	1.88e-09	62.5361	57.5939	3.19425	17.0072	22.9704	1362.66	1234.53	1023.53
682	Sv2a	267.754	-1.93798	0.298635	-6.48949	8.61e-11	1.89e-09	434.149	325.311	399.396	451.258	236.384	65.2499	109.273	121.009
683	Rpl35	1648.45	1.30669	0.201501	6.4848	8.89e-11	1.95e-09	1125.68	1193.85	980.953	1084.62	911.895	2564.39	1835.32	3490.84
684	Aph1c	355.872	2.17336	0.335194	6.4839	8.94e-11	1.96e-09	139.776	203.071	173.595	61.9194	192.102	880.507	678.023	517.983
685	Alox5ap	5055.53	-0.954315	0.147205	-6.48289	9e-11	1.97e-09	5726.74	6578.41	5854.93	5943.35	6772.34	3651.04	2596.04	3321.39
686	Rps5	3428.66	1.22326	0.189011	6.47193	9.68e-11	2.11e-09	2028.71	2209.96	2116.11	3221.49	1845.35	5253	4767.51	5987.18
687	Lgals3bp	7080.32	1.36489	0.210932	6.47073	9.75e-11	2.13e-09	5118.54	5885.18	4089.41	3055.96	4104.88	14195.6	9232.66	10960.3
688	Gm15931	66.3553	2.88285	0.445907	6.46514	1.01e-10	2.2e-09	14.6226	20.6546	21.6605	29.098	11.7749	192.157	88.3455	152.53
689	Cdca7	728.218	-1.18507	0.18342	-6.46098	1.04e-10	2.26e-09	1020.33	1061.27	903.193	873.193	763.701	443.907	430.04	330.116
690	Slc10a6	85.5267	2.92473	0.452696	6.4607	1.04e-10	2.26e-09	31.9217	7.0637	24.1344	31.0487	30.9128	205.179	200.728	153.226
691	Atp13a2	4074.32	0.864207	0.133807	6.4586	1.06e-10	2.29e-09	3156.21	3473.73	3327.67	3006.22	2618.73	5923.69	5598.82	5489.51
692	Cebpzos	900.613	-1.07085	0.165844	-6.45697	1.07e-10	2.31e-09	1096.9	1131.93	931.881	1177.95	1274.87	580.986	543.852	466.536
693	0610040J01Rik	3846.86	-1.19668	0.18554	-6.44971	1.12e-10	2.42e-09	5315.15	5484.86	4645.69	3737.48	5221.06	2715.18	1929.81	1725.64
694	Cd101	216.828	-2.21972	0.344345	-6.44619	1.15e-10	2.48e-09	505.162	255.937	257.205	216.906	304.661	50.0622	88.1263	56.5655
695	Daglb	12257.3	-0.936027	0.145259	-6.44383	1.16e-10	2.51e-09	17671.2	16056.3	13603.2	13202.9	14112.8	8538.65	6885.57	7988.13
696	Yes1	180.328	-1.90502	0.295636	-6.44379	1.17e-10	2.51e-09	191.523	241.66	292.115	299.712	227.989	80.4389	69.0244	40.1612
697	Tmem144	1165.89	-1.33268	0.207321	-6.42811	1.29e-10	2.78e-09	1673.3	1696.94	1474.74	1344.11	1352.21	824.037	476.872	484.939
698	Mgat4a	7503.86	-1.07379	0.167578	-6.40768	1.48e-10	3.17e-09	10052	8934.28	8735.09	9354.27	9610.01	4141.88	3432.64	5770.74
699	Abcg2	1149.9	-1.12167	0.17556	-6.38908	1.67e-10	3.58e-09	1355.46	1827.74	1150.24	1460.33	1413.59	639.683	664.386	687.788
700	Cln6	534.513	1.27125	0.199344	6.37716	1.8e-10	3.86e-09	378.455	291.851	368.988	402.637	312.549	1025.06	798.155	698.401
701	Srpk3	1056.28	-1.33711	0.209938	-6.3691	1.9e-10	4.06e-09	1512.1	1481.79	1413.94	1166.49	1267.32	743.208	471.394	393.989
702	Plekhg5	564.08	1.40037	0.219932	6.36728	1.92e-10	4.11e-09	457.295	370.366	313.776	351.442	254.012	1031.98	750.042	983.729
703	Clec4n	1198.48	5.69738	0.895808	6.36005	2.02e-10	4.3e-09	57.7768	48.0866	4.56833	28.5611	158.885	2818.83	2912.4	3558.74
704	Htra3	402.94	-2.41844	0.380647	-6.35352	2.1e-10	4.48e-09	846.886	757.244	398.495	322.814	584.692	176.297	91.614	45.4777
705	Tbc1d16	832.745	-1.6461	0.259221	-6.35019	2.15e-10	4.57e-09	1181.22	1510.99	805.489	901.936	1186.45	452.139	228.792	394.939
706	Cytip	542.651	4.08015	0.642737	6.34809	2.18e-10	4.63e-09	24.0992	104.32	69.7453	100.837	89.7441	740.091	640.008	2572.37
707	Map7	254.486	-2.24232	0.353652	-6.34049	2.29e-10	4.85e-09	550.967	443.588	334.904	229.511	244.142	92.6531	48.4409	91.6786
708	Plod1	7023.58	-1.00967	0.159364	-6.33562	2.36e-10	5e-09	10660.4	9164.12	7530.6	7438.51	8492.5	4748.33	3724.55	4429.64
709	Adam9	951.149	1.54226	0.243523	6.33311	2.4e-10	5.08e-09	839.257	545.005	375.03	476.299	533.023	1272.37	1665.59	1902.62
710	Card6	1330.26	-1.24224	0.196569	-6.31959	2.62e-10	5.53e-09	2095.7	1903.95	1470.23	1496.9	1539.27	897.88	668.883	569.291
711	Anxa6	1595.86	0.904279	0.143171	6.3161	2.68e-10	5.65e-09	1394.38	1155.1	1166.7	1062.29	1242.54	2426.48	2233.95	2085.46
712	Il18bp	63.0998	4.46171	0.706537	6.31491	2.7e-10	5.69e-09	1.33146	13.1063	14.265	6.07967	0	147.906	167.549	154.561
713	Efnb1	476.949	-1.6219	0.257028	-6.31021	2.79e-10	5.85e-09	512.378	536.101	772.4	845.216	529.446	263.032	159.415	197.601
714	Fchsd2	4370.05	-0.940653	0.149196	-6.30481	2.89e-10	6.05e-09	5111.27	5024.14	5852.1	5616.59	5042.66	3376.36	2482.12	2455.12
715	Ldhb	825.976	-1.51098	0.239827	-6.30029	2.97e-10	6.22e-09	1299.4	1055.16	908.803	1032.04	1149.05	422.835	228.72	511.801
716	Rplp1	7299.9	1.09331	0.173619	6.29718	3.03e-10	6.34e-09	4757.51	5524.69	4686.69	6521.93	4115	10961.2	9274.63	12557.5
717	Gm1966	293.572	2.04295	0.32468	6.29219	3.13e-10	6.54e-09	169.325	203.995	78.6922	120.232	107.069	740.587	547.827	380.851
718	Itgal	94.2951	2.86623	0.456179	6.28312	3.32e-10	6.92e-09	11.3627	20.1228	20.4045	31.3924	54.6147	226.933	154.95	234.581
719	Rplp0	10975.3	0.859042	0.137	6.2704	3.6e-10	7.5e-09	9024.69	9251.5	8136.15	8114.06	7510.85	15996.9	12987.7	16780.5
720	Cpne8	164.067	2.03481	0.325214	6.25683	3.93e-10	8.17e-09	74.827	93.7554	39.6696	77.5883	93.9922	248.971	372.662	311.069
721	Rps16	3112.69	1.15685	0.185093	6.25009	4.1e-10	8.52e-09	1752.45	2024.95	2055.27	2846.89	1964.97	4677.58	3933.69	5645.76
722	Fbxw17	345.791	1.28367	0.205482	6.24712	4.18e-10	8.67e-09	246.275	225.979	225.053	169.279	259.666	561.978	585.897	492.199
723	Sdk1	272.133	-1.75026	0.280362	-6.24285	4.3e-10	8.9e-09	362.56	427.422	366.649	263.261	437.563	146.81	102.428	70.3716
724	Lpcat2	19270.1	-0.829924	0.132988	-6.24062	4.36e-10	9e-09	26123.5	24853.8	20250.7	20730.1	23300.4	13863.7	12157.7	12880.6
725	Mcm9	63.1973	2.73239	0.437832	6.24073	4.36e-10	9e-09	13.3266	22.2507	28.189	16.9179	21.4568	164.035	167.522	71.8798
726	Enc1	783.309	-1.37772	0.220779	-6.24028	4.37e-10	9.01e-09	758.256	957.348	1258.65	1091.84	1040.53	461.446	430.93	267.464
727	Trerf1	145.384	1.9382	0.310852	6.23513	4.51e-10	9.3e-09	55.5984	54.273	82.4542	84.9226	70.3428	211.305	227.602	376.576
728	Fam26f	390.209	1.25861	0.201872	6.23471	4.53e-10	9.31e-09	296.737	252.689	254.028	265.77	215.67	731.68	518.992	586.107
729	Rptor	5295.25	-0.802137	0.128691	-6.23302	4.58e-10	9.4e-09	6555.48	6795.93	5846.54	5820.96	6494.76	3954.08	3227.05	3667.24
730	Folr2	474.484	3.989	0.640979	6.22329	4.87e-10	9.99e-09	79.4638	83.3325	11.7423	60.9087	124.621	1361.47	805.509	1268.82
731	Blvra	1140.64	1.0394	0.167154	6.21822	5.03e-10	1.03e-08	759.405	804.076	735.897	775.55	1011.78	1922.46	1515.87	1600.1
732	Lpl	1599.34	1.50443	0.242015	6.21629	5.09e-10	1.04e-08	630.539	932.284	1364.51	741.692	1056.93	2243.33	2394.3	3431.12
733	Lims1	2897.3	-0.839099	0.135264	-6.20341	5.53e-10	1.13e-08	3292.01	3465.79	3462.72	3378.31	3738.48	1969.05	1666.02	2206.03
734	Nfkb1	2275.72	-0.920468	0.148543	-6.19663	5.77e-10	1.18e-08	2849.89	3000.66	2527.14	2647.09	2783.61	1553.85	1197.47	1646.02
735	Lair1	13430.1	-0.734621	0.118583	-6.19499	5.83e-10	1.19e-08	16202.1	15921.7	15139.5	14669.2	17036.8	10401.7	8760.48	9309
736	Dnajb14	1716.63	0.893379	0.144296	6.19131	5.97e-10	1.21e-08	1200.96	1156.57	1333.69	1499.28	1298.45	2464.28	2185.54	2594.26
737	Slc1a5	255.384	1.86712	0.301629	6.19013	6.01e-10	1.22e-08	91.7847	94.6644	149.177	121.987	183.645	634.312	360.57	406.931
738	Mt1	1418.47	1.37017	0.221357	6.18988	6.02e-10	1.22e-08	951.131	953.571	784.523	993.187	756.31	2012.42	1604.05	3292.53
739	Wasl	858.368	1.41426	0.228491	6.18958	6.03e-10	1.22e-08	601.695	423.92	575.322	584.977	448.776	1599.93	913.237	1719.09
740	Src	384.611	-1.80353	0.291556	-6.18589	6.18e-10	1.25e-08	481.226	370.202	554.199	812.747	403.929	172.968	111.482	170.132
741	Abcc1	1315.03	-1.56316	0.253796	-6.1591	7.32e-10	1.48e-08	2071.59	1536.25	1949.04	1772.71	1430.79	679.663	780.715	299.516
742	Jam3	564.779	-1.08683	0.176691	-6.15098	7.7e-10	1.55e-08	763.774	740.23	707.09	739.419	573.916	310.297	355.082	328.421
743	Rps6ka1	7581.61	-0.878207	0.14277	-6.15118	7.69e-10	1.55e-08	10989.5	8923.4	8356.59	8423.34	9032.73	5485.92	4403.28	5038.06
744	Eva1a	314.767	-1.73587	0.282307	-6.14887	7.8e-10	1.57e-08	454.106	481.283	448.403	397.08	340.763	138.877	73.2955	184.332
745	Tnfsf13	176.488	1.83058	0.298178	6.13922	8.29e-10	1.67e-08	67.4166	125.254	67.9888	84.4422	102.482	374.131	249.109	341.081
746	Slc38a2	1776.73	-1.10037	0.179316	-6.13647	8.44e-10	1.69e-08	2593.2	2375.5	2245.45	1968.86	1928.58	1287.36	849.024	965.87
747	Sash3	4676.99	-0.967723	0.157707	-6.1362	8.45e-10	1.69e-08	6442.37	6504.86	5100.03	4601.99	5991.96	3244.54	2873.58	2656.55
748	Pvrl2	621.714	-1.43808	0.234788	-6.12504	9.07e-10	1.82e-08	1171.62	625.747	751.623	702.896	823.652	357.299	259.477	281.397
749	Dck	631.769	1.12011	0.183263	6.11204	9.84e-10	1.97e-08	388.811	474.032	430.175	519.933	382.106	1106.83	844.259	908
750	Mmp13	1941.86	6.60769	1.0813	6.11089	9.91e-10	1.98e-08	90.5122	6.51737	6.64829	16.9854	140.511	6376.4	5833.66	3063.63
751	Arhgef25	42.337	-8.0434	1.31649	-6.10974	9.98e-10	1.99e-08	78.1364	43.8117	75.3715	25.1255	116.25	0	0	0
752	Gm5970	61.6037	3.02191	0.49483	6.10696	1.02e-09	2.02e-08	13.2595	32.1149	10.8809	17.1952	8.76928	120.36	110.095	180.155
753	Lppr4	194.936	1.57393	0.257864	6.10372	1.04e-09	2.06e-08	83.1788	105.793	121.457	139.341	109.813	396.792	279.329	323.786
754	Sgsh	1105.92	1.03265	0.169248	6.10142	1.05e-09	2.09e-08	715.178	968.233	692.457	818.229	777.024	1853.09	1445.58	1577.54
755	Prpsap2	1691.13	-0.769015	0.126082	-6.09932	1.07e-09	2.11e-08	2022.93	2085.1	1962.93	2042.12	1903.53	1270.09	1152.47	1089.88
756	Rbpj	640.199	1.72789	0.283329	6.09854	1.07e-09	2.12e-08	381.031	495.969	182.547	325.775	324.003	1093.5	847.859	1470.91
757	Atp2b1	2034.82	0.98353	0.161954	6.0729	1.26e-09	2.49e-08	1855.87	1348.77	1550.71	1434.93	1253.74	2957.03	2666.88	3210.6
758	Inpp4b	2132.73	-1.06738	0.175806	-6.07133	1.27e-09	2.51e-08	2561.84	2378	2721.91	3087.48	2512	1522.39	955.472	1322.79
759	Wdr72	141.254	2.00057	0.329619	6.06936	1.28e-09	2.53e-08	40.8907	61.4429	72.6597	56.0518	100.88	317.162	264.928	216.017
760	Gm10275	1518.37	1.50593	0.24821	6.06718	1.3e-09	2.57e-08	859.662	956.993	768.964	1355.6	548.234	2445.59	2121.99	3089.93
761	Sdcbp	12904.6	0.661164	0.108984	6.0666	1.31e-09	2.57e-08	10621.9	11342.8	9926.67	10260.5	10816.1	17099.7	15867.7	17301.5
762	Rps9	8571.03	0.833295	0.137566	6.0574	1.38e-09	2.72e-08	6441.39	6968.33	6294.08	7586.32	5843.36	12220.6	10358	12856.2
763	Cds2	2421.14	-0.869008	0.143481	-6.0566	1.39e-09	2.73e-08	2804.51	3038.44	3399.03	2699.62	2626.46	1451.54	1614.11	1735.39
764	Cd300lb	104.432	3.25853	0.538374	6.05253	1.43e-09	2.8e-08	19.6876	43.6662	9.28265	9.13166	40.7196	372.184	135.839	204.943
765	Gm11808	2128.16	1.25462	0.207568	6.04438	1.5e-09	2.94e-08	1572.17	1517.13	1177.18	1622.92	1106.08	3421.93	2369.61	4238.28
766	Inpp4a	2212.72	0.951366	0.157448	6.04241	1.52e-09	2.97e-08	1768.01	1510.73	1486.38	1681.33	1740.64	3385.9	2515.6	3613.19
767	Akr1a1	8631.06	0.802255	0.132964	6.03362	1.6e-09	3.13e-08	7436.88	7163.78	5914.17	6746.01	6477.92	12488.4	10334.6	12486.7
768	Atpif1	2212.02	0.727455	0.120752	6.02438	1.7e-09	3.31e-08	1694.91	1717.18	1760.97	1839.02	1857.53	2956.02	2724.98	3145.55
769	Fscn1	8420.08	-1.1218	0.186217	-6.02413	1.7e-09	3.31e-08	12857.8	12071.7	9053.47	9616.84	9212.09	6219.41	4032.54	4296.83
770	Calm1	6361.77	1.16494	0.193435	6.02238	1.72e-09	3.34e-08	4837.11	4518.93	3785.77	4366.19	4178.25	9931.4	6535.35	12741.2
771	Cdk2ap1	274.851	-1.81645	0.301621	-6.02229	1.72e-09	3.34e-08	334.244	389.813	262.871	493.824	386.276	69.4142	102.811	159.551
772	Deptor	633.932	1.27334	0.211473	6.02128	1.73e-09	3.36e-08	527.447	437.931	309.824	373.319	430.348	1079.1	1121.27	792.22
773	Nab2	286.973	1.5582	0.259838	5.9968	2.01e-09	3.9e-08	142.364	144.699	187.43	194.31	155.193	467.387	336.904	667.493
774	Ndufb2	3680.25	0.947834	0.158114	5.99463	2.04e-09	3.95e-08	2322.88	3115.13	2633.16	3092.49	2490.32	5958.7	5381.05	4448.25
775	Snx2	3012.85	0.958354	0.159874	5.99442	2.04e-09	3.95e-08	2175.77	2469.19	1856.21	1929.67	2693.07	4548.68	3962.96	4467.28
776	Cyb5r1	1897.7	1.05975	0.177065	5.9851	2.16e-09	4.17e-08	1665.85	1313.31	1024.57	1381.14	1369.61	3198.61	2817.81	2410.72
777	Eif1ax	681.89	1.10121	0.184181	5.97893	2.25e-09	4.33e-08	484.183	526.908	480.562	352.962	535.671	945.223	1031.38	1098.23
778	Slc25a37	1990.39	-1.26697	0.212224	-5.96996	2.37e-09	4.57e-08	3060.1	2282.03	2411.65	2505.32	2488.25	1450.04	708.339	1017.36
779	Tbc1d4	925.792	1.22718	0.205589	5.96908	2.39e-09	4.59e-08	680.949	724.134	485.203	666.365	517.171	1476.02	1106.89	1749.6
780	Ncoa4	6369.9	0.89132	0.149472	5.96314	2.47e-09	4.75e-08	5246.63	5243.48	4771.09	4161.47	4703.4	10734.5	8156.9	7941.72
781	Tgfb3	64.7755	3.14816	0.52872	5.95431	2.61e-09	5.01e-08	25.3047	10.3155	14.942	22.9369	8.6064	106.861	75.0228	254.215
782	Tmem110	328.062	-1.61381	0.271238	-5.94982	2.68e-09	5.14e-08	424.938	368.052	435.637	649.777	313.858	123.059	154	155.175
783	Hdac11	336.2	-1.24956	0.210065	-5.94845	2.71e-09	5.17e-08	459.126	452.621	370.143	425.624	433.099	147.506	200.418	201.062
784	Tap1	1996.58	0.994774	0.167231	5.9485	2.71e-09	5.17e-08	1813.64	1376.66	1254.23	1262.38	1567.42	3136.26	2545.32	3016.73
785	Tspan14	7893.28	-0.768316	0.129212	-5.94617	2.74e-09	5.24e-08	9423.12	10272.8	8856.87	8360.02	9796.04	6078.92	5359.26	4999.16
786	Nrros	7913.24	1.40616	0.236526	5.94506	2.76e-09	5.27e-08	7175	4814.74	3816.02	3550.01	5079.81	12821.1	9255.15	16794.1
787	Rps7	2334.37	0.976032	0.164244	5.94257	2.81e-09	5.34e-08	1664.25	1895.05	1343.97	1992.55	1669.09	3759.73	2954.4	3395.92
788	Slc36a1	847.002	-1.24152	0.208969	-5.94117	2.83e-09	5.38e-08	1014.08	939.842	1292.01	1237.43	932.385	562.819	472.292	325.168
789	Cd180	1737.34	-1.27257	0.214318	-5.93775	2.89e-09	5.49e-08	2540.72	2096.62	2035.99	2345.03	2090.3	902.403	599.009	1288.62
790	Comp	89.8226	-2.11604	0.356601	-5.93391	2.96e-09	5.61e-08	146.373	148.298	114.749	106.014	114.777	23.677	33.148	31.5457
791	Tmem261	669.736	1.24648	0.21008	5.93333	2.97e-09	5.62e-08	393.138	514.831	299.879	549.794	452.816	1067.29	1053.66	1026.48
792	Gmpr	1172.82	-1.10851	0.187016	-5.92734	3.08e-09	5.82e-08	1485.35	1546.27	1348.26	1578.39	1364.63	716.027	490.587	853.03
793	Gpr160	1857.65	0.79426	0.134106	5.92261	3.17e-09	5.98e-08	1582.14	1448.02	1359.23	1511.05	1391.16	2828.31	2414.1	2327.15
794	Gpx3	132.511	2.6613	0.449337	5.92273	3.17e-09	5.98e-08	46.6869	81.6925	12.0291	42.6719	38.6768	343.411	253.92	241
795	Sult1a1	3728.18	0.873483	0.147548	5.92001	3.22e-09	6.07e-08	2872.2	3316.67	2275.7	3057.08	2685.79	5352.84	5074.89	5190.25
796	Rps15	2020.65	1.03754	0.175271	5.91965	3.23e-09	6.07e-08	1307.31	1395.8	1435.22	1885.51	1216.32	3094.48	2539.06	3291.5
797	Slc16a6	3354.62	-1.03687	0.175283	-5.9154	3.31e-09	6.22e-08	4577.69	4200.62	3643.05	3280.54	5053.28	2157.68	1694.61	2229.54
798	Sema4c	452.71	-1.52974	0.258652	-5.91426	3.33e-09	6.26e-08	768.892	489.617	702.677	479.813	532.665	171.644	173.558	302.809
799	Phf11a	82.5225	2.31751	0.391988	5.91218	3.38e-09	6.33e-08	22.5593	47.3352	27.5809	27.2416	37.4576	175.98	109.884	212.141
800	1200014J11Rik	1840.46	-0.763509	0.129234	-5.90796	3.46e-09	6.48e-08	2159.56	2344.52	2251.35	2094.44	2032.8	1212.22	1388.67	1240.13
801	Rapgef1	1152.82	-1.43151	0.242401	-5.90555	3.51e-09	6.57e-08	2266.77	1551.01	1002.38	1421.92	1301.2	632.92	450.518	595.887
802	Tsc22d1	330.935	1.18966	0.201537	5.90295	3.57e-09	6.67e-08	260.447	238.776	177.887	215.375	228.375	554.489	517.235	454.899
803	Klhl25	1341.79	-0.956104	0.162041	-5.90038	3.63e-09	6.76e-08	1754.37	1652.49	1554.25	1542.91	1710.05	1035.77	783.429	701.027
804	Zfp36l1	5079.07	1.02269	0.173374	5.89877	3.66e-09	6.82e-08	4495.25	3898.1	3458.33	3419.08	3035.48	7942.44	5852.97	8530.95
805	Il1a	2018.14	-1.36161	0.230966	-5.89529	3.74e-09	6.96e-08	3002.44	2764.55	2532.15	1473.67	3307.38	992.863	880.429	1191.59
806	Batf2	111.625	2.91285	0.494666	5.88852	3.9e-09	7.24e-08	64.3728	27.6496	31.568	4.26016	34.7005	284.854	244.274	201.322
807	Smpd3	149.694	1.65147	0.281171	5.87356	4.27e-09	7.92e-08	102.623	66.7489	89.5282	70.6393	83.3474	205.734	255.26	323.668
808	Crybb1	3454.82	-1.25343	0.2135	-5.87085	4.34e-09	8.04e-08	5053.65	4404.93	3914.2	3915.56	4782.63	2239.44	1123.18	2204.95
809	Iffo1	3174.28	-1.01529	0.173031	-5.8677	4.42e-09	8.18e-08	4913.27	3976.54	3500.38	3745.17	3441.88	2212.31	1551.65	2053.04
810	Pparg	134.444	5.84279	0.996819	5.86144	4.59e-09	8.49e-08	12.3543	0	3.81187	2.29616	12.1017	308.275	323.885	412.824
811	Ctnna1	1305.49	0.840938	0.143573	5.85722	4.71e-09	8.69e-08	991.073	1110.13	979.156	932.823	1018.98	2012.2	1593.23	1806.33
812	Cltc	18749.8	0.615721	0.105244	5.85039	4.9e-09	9.05e-08	16324.5	15775.1	16037.7	15179.1	14840.7	25189.3	23777.1	22874.6
813	Nrarp	44.5723	-5.30094	0.906663	-5.84665	5.02e-09	9.24e-08	64.8757	25.9352	94.2623	107.38	60.1062	0	4.01933	0
814	Gm15539	201.131	-1.82524	0.312617	-5.83857	5.27e-09	9.69e-08	241.98	288.126	228.022	295.294	332.239	114.022	69.8928	39.4691
815	Crem	324.53	2.07495	0.355532	5.83619	5.34e-09	9.82e-08	118.514	163.88	124.075	146.377	175.358	346.552	378.503	1142.98
816	Nck1	997.917	-0.825495	0.141877	-5.81837	5.94e-09	1.09e-07	1241.03	1233.65	1080.81	1203.17	1205.08	721.356	622.473	675.768
817	Raph1	695.767	1.87877	0.323412	5.80923	6.28e-09	1.15e-07	136.064	362.021	473.803	408.061	360.434	1498.88	1502.44	824.434
818	Dnaaf3	213.306	1.41251	0.243306	5.8055	6.42e-09	1.18e-07	176.929	126.59	102.331	122.126	132.212	374.258	345.464	326.542
819	Ccl3	377.289	2.39518	0.412711	5.80353	6.49e-09	1.19e-07	85.7931	182.466	205.122	135.516	112.404	628.988	265.538	1402.49
820	Icam1	3292.69	-0.983075	0.16939	-5.80362	6.49e-09	1.19e-07	4184.22	4572.37	3675.09	3424.79	4337.77	2227.59	1582.43	2337.24
821	Tcirg1	10575.6	-0.819985	0.141295	-5.80334	6.5e-09	1.19e-07	13770.7	13240	11365.8	11682.7	13098.7	8446.43	6514.43	6486.25
822	Med12l	921.863	-1.14685	0.197726	-5.80017	6.62e-09	1.21e-07	978.512	1217.26	978.174	1175.22	1465.76	607.319	540.664	411.984
823	Hspb3	334.082	-1.54773	0.267347	-5.78922	7.07e-09	1.29e-07	487.107	388.333	420.361	321.099	594.045	166.407	110.43	184.875
824	Rgs10	10507.3	-0.788151	0.136146	-5.789	7.08e-09	1.29e-07	11399.3	12444.6	11287.5	14412.4	12832.6	7710.67	6366.92	7604.56
825	Ms4a4c	157.374	2.22102	0.383881	5.78571	7.22e-09	1.31e-07	101.406	30.5565	91.9666	64.2319	48.447	399.608	252.914	269.862
826	Cd81	52825.8	-0.70148	0.121266	-5.78464	7.27e-09	1.32e-07	63826.9	67761.7	56166.7	57024.9	63917.7	39646.1	34847	39415.3
827	Fam213b	560.495	1.03602	0.179188	5.78178	7.39e-09	1.34e-07	450.585	346.79	379.657	425.003	406.737	894.339	687.405	893.441
828	Siglech	48034.1	-0.753205	0.130366	-5.77761	7.58e-09	1.37e-07	56028.8	61237.6	55627.4	54305.1	56192.6	38570.1	28492.9	33818.5
829	Rps21	1198.16	1.36484	0.23658	5.76907	7.97e-09	1.44e-07	572.553	788.392	684.661	1127.69	587.746	1838.57	1579.36	2406.3
830	Rpl41	5692.31	0.987845	0.171351	5.76503	8.16e-09	1.47e-07	3748.08	4358.58	3999.1	4985.19	3691.6	8000.4	6549.26	10206.2
831	Abcg1	9266.48	0.917808	0.159379	5.75867	8.48e-09	1.53e-07	8573.21	6797.16	6728.31	5690.65	6953.66	14168.4	11063.3	14157.1
832	Adck5	662.142	1.01799	0.176903	5.75455	8.69e-09	1.56e-07	591.56	484.572	449.376	398.453	469.121	1046.54	893.794	963.722
833	Acat1	1597.86	0.971922	0.16894	5.75307	8.76e-09	1.58e-07	1167.53	1240.29	969.967	1110.5	1373.72	1918.11	2317	2685.75
834	Pyhin1	447.941	1.72531	0.300029	5.75048	8.9e-09	1.6e-07	270.965	214.501	290.222	202.4	229.119	1262.04	699.721	414.553
835	Txnip	20241.9	0.777861	0.135328	5.74799	9.03e-09	1.62e-07	17084.7	17743.9	16136.1	15094.9	13751.9	27784.4	24277.1	30062
836	Rbms1	480.729	1.40302	0.244326	5.74242	9.33e-09	1.67e-07	336.839	243.894	316.418	339.382	242.721	693.407	572.521	1100.65
837	Sema4g	183.457	-2.30356	0.401697	-5.73458	9.78e-09	1.75e-07	205.089	315.612	201.354	415.184	174.724	83.9681	31.6154	40.1094
838	Abl1	3641.19	-0.894328	0.155982	-5.73352	9.84e-09	1.76e-07	5473.36	4432.56	4067.3	4028.09	4030.23	2703.49	2236.58	2157.88
839	Ttc13	992.54	-0.841886	0.146863	-5.73246	9.9e-09	1.77e-07	1264.03	1251.99	1068.54	1262.62	1096.27	667.352	626.84	702.67
840	Dcxr	1224.74	1.1938	0.20837	5.72924	1.01e-08	1.8e-07	1015.16	901.911	540.868	912.94	755.621	1663.42	1819.65	2188.32
841	Extl3	5632.45	-1.14804	0.200408	-5.72851	1.01e-08	1.8e-07	9147.08	8148.37	6142.91	5785.94	6250.36	4034.72	3060.89	2489.3
842	Col15a1	320.955	-1.81043	0.317045	-5.71034	1.13e-08	2.01e-07	643.25	236.951	442.651	408.976	470.157	152.247	121.732	91.6802
843	Pigz	340.39	1.65861	0.290656	5.70641	1.15e-08	2.05e-07	212.574	271.067	157.365	95.8213	202.127	582.272	582.885	619.008
844	Plin3	386.65	1.25211	0.219611	5.70149	1.19e-08	2.11e-07	330.343	256.233	255.599	223.273	213.175	737.381	540.278	536.918
845	Rplp2	2509.35	1.22677	0.215242	5.69948	1.2e-08	2.13e-07	1418.74	1667.34	1592.1	2494.62	1175.7	3792.35	3634.86	4299.11
846	Tspan17	113.507	2.56491	0.450031	5.6994	1.2e-08	2.13e-07	73.4897	53.3839	21.0532	39.8509	16.0542	206.883	215.273	282.064
847	Rpl23	3832.31	1.0744	0.188579	5.69734	1.22e-08	2.15e-07	2045.7	2870.15	2542.24	3691.66	2389.83	5657.17	5128.09	6333.68
848	Fam21	1378.39	1.10478	0.193976	5.69546	1.23e-08	2.17e-07	993.985	891.763	796.213	849.401	1282.93	2443.69	1739.67	2029.43
849	St5	865.183	-1.18949	0.208986	-5.6917	1.26e-08	2.22e-07	1297.32	1253.72	1079.9	1030.46	835.4	566.715	510.336	347.615
850	Scube1	174.061	-2.46768	0.433671	-5.69021	1.27e-08	2.24e-07	453.058	254.989	167.199	206.499	164.126	49.6221	23.1522	73.8429
851	Smyd2	156.951	1.96405	0.346115	5.67455	1.39e-08	2.45e-07	52.737	81.8433	73.5136	120.067	45.3973	237.618	273.288	371.141
852	Pycard	4967.84	-0.798689	0.140909	-5.66812	1.44e-08	2.54e-07	6344.95	5889.81	5453.05	5911.21	5959.48	4051.16	2953.19	3179.87
853	P2rx1	324.353	-1.75287	0.30972	-5.65953	1.52e-08	2.67e-07	452.128	515.699	551.059	422.318	265.629	188.751	88.7525	110.49
854	Mettl7a1	992.803	-1.01988	0.180551	-5.64874	1.62e-08	2.83e-07	1143.47	1427.7	1185.85	1241.33	1146.7	739.652	595.409	462.301
855	Prdm1	1042.46	1.07798	0.191197	5.63803	1.72e-08	3.01e-07	856.829	786.522	774.68	608.665	637.914	1382.12	1322.31	1970.65
856	Spata5	336.852	-1.24697	0.221316	-5.63432	1.76e-08	3.08e-07	488.072	491.397	453.522	388.623	327.292	187.157	170.094	188.662
857	Neu1	2689.98	1.09726	0.194832	5.63182	1.78e-08	3.12e-07	2400.33	1788.32	1723.03	1575.16	1922.75	3884.01	3063.4	5162.85
858	Rffl	1831.95	-0.803841	0.142834	-5.6278	1.83e-08	3.19e-07	2285.14	2112.29	1897.41	2093.42	2518.2	1309.43	1185.7	1254.02
859	Cndp2	4820.87	0.899895	0.160068	5.62195	1.89e-08	3.29e-07	4164.04	3864.87	3529.59	2948.27	3682.46	7312.48	5530.5	7534.78
860	Tmem64	493.186	-1.07672	0.191711	-5.61636	1.95e-08	3.4e-07	578.342	550.862	610.281	762.453	565.382	259.173	303.681	315.313
861	Rps23-ps	3118.08	1.15792	0.206214	5.61512	1.96e-08	3.42e-07	1985.93	2171.29	1974.04	2858.82	1667.54	4385.42	3722.07	6179.53
862	Runx1	2922.13	0.952746	0.169792	5.61127	2.01e-08	3.49e-07	2577.42	2202.48	1765.05	2349.33	1918.9	4560.1	3440.76	4562.96
863	Use1	1404.06	0.933905	0.166493	5.60929	2.03e-08	3.53e-07	1139.68	1096.52	983.109	1053.19	951.986	2070.11	1564.48	2373.38
864	Accs	1248.83	-1.09882	0.195901	-5.60903	2.03e-08	3.53e-07	1909.9	1717.64	1269.51	1370.14	1525.25	771.608	562.77	863.857
865	Litaf	6006.59	0.921965	0.164483	5.60523	2.08e-08	3.6e-07	4854.14	4386.66	4117.17	4845.11	4268.48	7452.75	7147.63	10980.7
866	Tm6sf1	3794.71	0.72033	0.128552	5.60342	2.1e-08	3.63e-07	3277.31	2821.61	3264.12	3061.51	2833.83	4960.92	4595.1	5543.31
867	Slc7a6	250.564	-1.60631	0.286886	-5.59911	2.15e-08	3.72e-07	341.017	416.908	325.273	355.778	223.566	92.5078	90.3026	159.16
868	Twf1	2601.45	0.874037	0.156126	5.59826	2.17e-08	3.74e-07	1829.41	2112.95	1997.75	1773.96	2182.1	3524.94	3029.01	4361.5
869	Gdf15	33.5182	4.60868	0.823283	5.59792	2.17e-08	3.74e-07	5.44752	0.558266	5.24928	0	5.76241	47.3146	41.3739	162.44
870	Atp6v1a	2485.55	0.851976	0.15225	5.5959	2.19e-08	3.78e-07	1968.22	1799.25	2007.76	1527.3	2239.11	3433.41	3260.38	3648.93
871	Vash1	59.7308	-2.86089	0.511253	-5.59583	2.2e-08	3.78e-07	92.8715	76.3401	72.082	95.6388	110.617	10.9662	19.3314	0
872	Vmp1	1948.63	1.01215	0.18103	5.59107	2.26e-08	3.88e-07	1342.46	1402.78	1464.46	1413.84	1412.12	2737.14	2081.2	3735.01
873	Clec5a	2314.12	-0.851241	0.152317	-5.58863	2.29e-08	3.93e-07	2706.86	2776.26	2801.9	2360.73	3231.65	1541.14	1349.42	1744.99
874	Igsf6	1803.93	1.10729	0.1983	5.58391	2.35e-08	4.03e-07	1129.33	1596.85	1002.66	1042.34	1526.52	3027.06	2845.99	2260.71
875	Slc16a3	689.685	-1.53324	0.274647	-5.58258	2.37e-08	4.06e-07	1035.22	995.768	826.743	563.682	1132.65	298.704	207.874	456.84
876	Ahdc1	251.773	-1.72849	0.309743	-5.58038	2.4e-08	4.1e-07	292.386	259.215	337.58	565.175	250.756	103.876	93.8905	111.307
877	Adssl1	498.399	1.18407	0.212284	5.57776	2.44e-08	4.16e-07	399.937	297	324.527	397.986	268.572	871.753	614.628	812.79
878	Rpl34	2964.55	1.02311	0.183786	5.56686	2.59e-08	4.42e-07	1685.26	2252.86	2071.06	2710.37	1956.99	4123.44	3636.53	5279.88
879	Azin1	2050.39	-0.881513	0.158384	-5.56569	2.61e-08	4.45e-07	2684.98	2636.8	2416	2168.94	2442.04	1258.84	1145.51	1649.99
880	Hlx	764.79	1.31284	0.236204	5.55809	2.73e-08	4.64e-07	606.189	581.56	358.722	538.625	374.793	1561.2	976.927	1120.3
881	Cd200r4	69.3637	2.31003	0.416625	5.54462	2.95e-08	5.01e-07	33.2803	13.2516	39.0031	27.3508	27.9954	123.135	154.874	136.02
882	Nlrp1a	356.36	-1.50831	0.272503	-5.53502	3.11e-08	5.28e-07	625.843	512.673	505.629	335.029	368.373	119.868	180.042	203.419
883	Rpl37	1292.18	1.12672	0.203636	5.53298	3.15e-08	5.34e-07	771.369	949.063	734.841	1238.79	776.262	2004.65	1633.71	2228.74
884	1810011O10Rik	229.399	1.44786	0.262073	5.52466	3.3e-08	5.59e-07	170.134	160.356	94.1606	110.413	161.21	407.755	359.97	371.197
885	Apaf1	770.261	1.1691	0.211734	5.52155	3.36e-08	5.69e-07	432.666	616.988	427.383	487.123	647.546	1179.1	941.514	1429.77
886	Gm10309	39.609	-4.25283	0.770299	-5.521	3.37e-08	5.7e-07	50.5315	64.6686	71.6011	32.0734	82.9253	1.68746	1.61967	11.7651
887	Fau	7742.17	0.983482	0.17833	5.51494	3.49e-08	5.89e-07	4603.01	5840.51	5557.17	7601.48	4725.92	12150.7	9879.54	11579.1
888	Reps2	212.117	4.14944	0.752426	5.51475	3.49e-08	5.89e-07	47.626	5.14081	58.4439	10.6798	29.0788	576.382	467.057	502.525
889	Zbtb42	72.3301	2.06081	0.374396	5.50434	3.71e-08	6.24e-07	40.666	41.059	37.1724	21.4889	24.8357	123.358	148.072	141.988
890	Plgrkt	1746.87	-0.857415	0.155808	-5.50302	3.73e-08	6.28e-07	2246.88	2043.01	2091.14	2089.11	2049.24	1338.92	1226.77	889.92
891	Gm21857	88.7711	3.40996	0.61975	5.50216	3.75e-08	6.31e-07	2.65245	28.8458	15.897	18.195	30.0404	260.116	312.191	42.2313
892	Trim14	973.513	1.07402	0.195268	5.50026	3.79e-08	6.37e-07	675.092	808.131	575.134	609.884	774.853	1822.63	1194.34	1328.05
893	Rps24	3051.62	1.1817	0.214905	5.49871	3.83e-08	6.42e-07	1743.04	2010.54	1813.03	3168.04	1603.12	4709.57	4139.46	5226.19
894	Zeb1	858.987	-1.21597	0.221168	-5.49794	3.84e-08	6.44e-07	1091.38	1093.72	1199.87	1018.25	1079.49	612.643	507.36	269.185
895	Sdf4	5627.72	0.702167	0.127747	5.49656	3.87e-08	6.48e-07	4529.21	4949.33	4389.26	4204.4	4693.8	7116.78	6749.46	8389.55
896	Arrdc3	1965.56	1.30666	0.237869	5.4932	3.95e-08	6.6e-07	1400.65	1482.44	1315.95	697.613	1439.58	3872.4	3082.37	2433.48
897	Ank2	1496.71	-0.810797	0.147704	-5.48933	4.03e-08	6.74e-07	1708.51	1819.42	1867.18	1807.1	1731.6	941.092	1208.68	890.132
898	Nrep	580.281	-1.15489	0.210417	-5.48857	4.05e-08	6.76e-07	763.876	738.335	655.049	582.467	918.551	277.923	391.905	314.143
899	Samd9l	318.655	2.04994	0.373735	5.48502	4.13e-08	6.89e-07	261.233	211.637	77.9158	94.5033	88.8455	652.158	639.285	523.664
900	Rhoq	521.483	-1.10607	0.201961	-5.47667	4.33e-08	7.21e-07	547.591	571.011	582.299	787.821	772.045	313.36	286.901	310.834
901	Rps12-ps3	778.963	1.21275	0.221746	5.46911	4.52e-08	7.52e-07	447.252	497.883	459	752.22	445.201	1093.36	1042.96	1493.82
902	Gltp	2728.79	0.849104	0.155278	5.46827	4.54e-08	7.55e-07	2541.1	1828.72	2232.83	2030.33	1857.91	3984.23	3346.05	4009.18
903	Uba52	2211.45	1.15169	0.210692	5.46625	4.6e-08	7.62e-07	1079.53	1538.62	1416.86	2142.03	1398.37	2957.49	3087.53	4071.21
904	Rgs14	491.867	1.14977	0.210402	5.46461	4.64e-08	7.69e-07	388.836	379.362	290.835	323.636	314.557	858.154	842.15	537.404
905	Nfix	209.644	-1.79913	0.329724	-5.45648	4.86e-08	8.04e-07	224.886	259.842	323.195	392.463	230.134	115.751	52.7072	78.1701
906	Acvrl1	1167.53	1.18877	0.217927	5.45488	4.9e-08	8.1e-07	1056.92	842.899	622.212	702.364	715.613	1897.98	1308.99	2193.25
907	Lig1	307.359	1.36204	0.250012	5.44792	5.1e-08	8.42e-07	145.306	185.322	201.574	216.79	207.283	463.576	363.875	675.147
908	Aldh9a1	1659.81	1.04295	0.191545	5.44496	5.18e-08	8.55e-07	1446.79	1085.4	1008.01	980.266	1415.3	2732.07	1960.87	2649.74
909	Enpp4	929.444	1.15364	0.211891	5.44448	5.2e-08	8.56e-07	805.999	732.029	589.008	562.044	505.497	1667.09	1523.36	1050.52
910	Abhd15	4382	-0.968523	0.177907	-5.44399	5.21e-08	8.58e-07	6956.53	5651.42	4232.14	5282.85	4719.01	3108.43	2718.68	2386.95
911	Abhd17c	170.07	-1.55045	0.284908	-5.44196	5.27e-08	8.66e-07	176.427	260.251	184.648	258.995	247.904	88.4903	63.559	80.2847
912	Lefty1	323.198	-1.19139	0.21933	-5.43193	5.57e-08	9.16e-07	469.726	416.166	432.823	334.913	388.04	194.022	145.797	204.094
913	Rps26	1123.81	1.2569	0.231455	5.43043	5.62e-08	9.22e-07	480.987	732.584	735.463	956.674	779.819	1698.82	1325.42	2280.7
914	Prkce	407.929	-2.21003	0.407075	-5.42905	5.67e-08	9.27e-07	329.368	493.706	648.527	783.175	607.415	52.036	86.0746	263.132
915	Tnni3	83.9558	1.78787	0.329315	5.42905	5.67e-08	9.27e-07	50.6312	43.3669	35.1005	43.9981	45.3083	170.735	118.914	163.593
916	Znrf1	386.674	-1.1318	0.208664	-5.42406	5.83e-08	9.53e-07	396.585	438.908	542.461	490.057	563.56	233.993	215.503	212.323
917	Bcl2a1b	3252.47	1.00622	0.185554	5.42282	5.87e-08	9.58e-07	2132.84	2291.19	2197.57	2525.42	2639.4	4752.52	3376.34	6104.49
918	Rbbp9	798.398	-1.01699	0.187545	-5.42264	5.87e-08	9.58e-07	1160.44	981.127	880.548	967.984	949.499	609.792	435.472	402.325
919	P4ha1	6355.62	-0.811606	0.149684	-5.42214	5.89e-08	9.6e-07	7209.33	7943.79	7158.79	6689.51	8873.7	4418.54	3649.18	4902.14
920	Hpn	503.387	1.11064	0.204848	5.42179	5.9e-08	9.61e-07	255.66	395.886	396.023	379.015	321.311	744.741	663.213	871.245
921	Chsy1	888.353	-1.11787	0.20632	-5.41815	6.02e-08	9.79e-07	1063.22	1155.04	1042.64	992.96	1294.25	512.943	364.258	681.502
922	Erf	234.567	-1.64686	0.304112	-5.4153	6.12e-08	9.94e-07	356.822	214.68	280.276	389.259	334.217	134.533	68.1082	98.6403
923	Rpl31-ps8	621.498	1.2557	0.231924	5.41426	6.15e-08	9.99e-07	293.908	392.568	394.276	610.321	350.56	957.353	898.449	1074.55
924	F9	186.892	-2.00149	0.369757	-5.413	6.2e-08	1e-06	177.042	185.738	285.011	355.622	304.359	50.7984	100.968	35.5961
925	Il1rl2	1095.87	-0.970131	0.179265	-5.4117	6.24e-08	1.01e-06	1553.26	1384.41	998.944	1269.63	1509.57	675.465	724.437	651.237
926	Slc12a7	1239.63	1.20656	0.223024	5.41001	6.3e-08	1.02e-06	927.602	1056.59	877.876	769.077	533.182	2347.23	1831.12	1574.37
927	Synj2	183.234	-1.64895	0.304815	-5.40969	6.31e-08	1.02e-06	253.488	216.078	211.313	289.181	261.672	50.809	107.424	75.9105
928	Capg	530.361	-1.2775	0.236212	-5.4083	6.36e-08	1.03e-06	891.377	790.679	571.419	497.842	652.801	332.985	241.479	264.309
929	Trim2	1095.55	-1.0148	0.187714	-5.40609	6.44e-08	1.04e-06	1573	1548.94	1217.29	1377.19	1037.08	567.261	729.888	713.734
930	Qprt	138.41	-1.64317	0.304054	-5.40421	6.51e-08	1.05e-06	202.907	230.079	190.271	136.178	172.537	56.5927	69.1335	49.5805
931	Sod1	2282.3	0.81646	0.151099	5.40348	6.54e-08	1.05e-06	1481.55	1962.58	1705.27	1848.57	1867.96	3099.91	2729.8	3562.73
932	Epb4.1	1504.75	0.958203	0.177518	5.39777	6.75e-08	1.08e-06	1382.29	1077.22	1058.42	913.356	1118.58	2034.77	1857.06	2596.29
933	Tmem256	741.083	1.03127	0.191134	5.39553	6.83e-08	1.1e-06	457.457	591.846	503.159	586.459	514.386	1067.9	850.668	1356.8
934	Pros1	10965.2	-0.664537	0.123198	-5.39407	6.89e-08	1.1e-06	14103.4	13439.8	11731.8	11481	12879.9	8487.22	7665.89	7932.23
935	Phlda1	23.5358	4.86489	0.902438	5.39083	7.01e-08	1.12e-06	3.80248	2.59038	3.9692	0	0	23.3159	76.1752	78.4335
936	C1qtnf1	107.279	1.5621	0.290174	5.38332	7.31e-08	1.17e-06	50.6917	71.2162	68.301	65.7863	52.1945	171.201	176.31	202.533
937	Gorasp2	2432.58	-0.743509	0.13818	-5.38071	7.42e-08	1.19e-06	3083.56	3043.52	2495.82	2668.65	3034.05	1841.21	1572.96	1720.89
938	Pdzrn4	91.4605	2.28518	0.424815	5.37925	7.48e-08	1.19e-06	11.8183	55.1369	31.0468	48.6682	37.5507	191.49	157.788	198.184
939	Tbc1d9	1239.17	-1.23252	0.229268	-5.37589	7.62e-08	1.22e-06	2170.45	1622.08	1463.71	1490.41	1156.04	881.478	524.986	604.202
940	Mertk	17617.1	-0.735225	0.136864	-5.37194	7.79e-08	1.24e-06	23376.3	21917.8	18850.8	19470.5	19999.2	14158.3	12287.7	10876
941	Naa35	2059.59	-0.803726	0.149707	-5.36867	7.93e-08	1.26e-06	2286.79	2509.27	2732.18	2084.39	2631.71	1331.95	1303.58	1596.87
942	Slc9a3r1	849.885	0.971075	0.181	5.36507	8.09e-08	1.29e-06	780.448	571.75	526.352	664.881	579.654	1281.76	1054.84	1339.39
943	Rasgrp2	164.346	2.93806	0.547888	5.36251	8.21e-08	1.3e-06	54.4527	20.3812	118.474	14.5095	29.5112	242.43	321.412	513.6
944	Cfap43	427.702	1.45154	0.27088	5.3586	8.39e-08	1.33e-06	176.066	349.97	324.546	164.679	276.516	741.748	626.543	761.547
945	Clec4a2	2648.01	0.860563	0.160738	5.35381	8.61e-08	1.36e-06	1758.68	1983.92	2001.13	2042.16	2359.3	4471.63	3407.99	3159.25
946	Fkbp1a	2446.45	0.901067	0.168309	5.35365	8.62e-08	1.36e-06	1990.02	1777.72	1493.83	2301	1670.71	3846.63	3108.13	3383.57
947	Clstn1	758.504	-0.868013	0.162149	-5.35317	8.64e-08	1.37e-06	1031.33	976.55	899.739	862.689	796.986	536.134	463.504	501.103
948	Ctso	4069.87	-0.597799	0.1118	-5.34705	8.94e-08	1.41e-06	4563.58	4724.19	4443.44	4846.07	4735.47	2899.44	3225.4	3121.35
949	Pcyox1	4095.03	0.716701	0.134065	5.3459	9e-08	1.42e-06	3659.5	3486.77	3220.64	2976.45	3166.32	5883.18	5618.94	4748.45
950	Klra2	109.684	1.95792	0.366368	5.34414	9.08e-08	1.43e-06	43.4636	41.8362	52.8469	91.6174	35.5913	200.135	233.899	178.082
951	Asb2	1937.18	-1.10371	0.206597	-5.3423	9.18e-08	1.45e-06	3198.85	2544.63	2283.47	2251.15	1828.98	1271.58	844.909	1273.83
952	Foxn3	3642.88	-0.750529	0.140544	-5.34017	9.29e-08	1.46e-06	4881.98	3671.34	4685.82	4263.55	3983.71	2728.07	2428.12	2500.42
953	Ptpn18	3552.56	0.802665	0.150354	5.3385	9.37e-08	1.47e-06	2923.73	2815.63	2676.83	2950.63	2507.92	5022.36	3887.4	5636
954	Aldoc	90.7184	3.12265	0.58586	5.33002	9.82e-08	1.54e-06	0	26.7419	37.9182	33.6136	17.6299	173.225	175.203	261.416
955	Armc3	124.94	-2.34855	0.440939	-5.32624	1e-07	1.57e-06	163.738	147.174	200.238	183.777	208.819	64.3548	27.4601	3.95666
956	S100a1	238.018	1.66162	0.312392	5.31903	1.04e-07	1.63e-06	79.6873	167.859	96.5379	122.683	185.633	443.642	312.708	495.394
957	Gnb2l1	3439.91	0.846061	0.159099	5.31782	1.05e-07	1.64e-06	2636.56	2913.13	2417.5	3080.24	2182.8	4564.4	4232.53	5492.09
958	Atp6v0c	10549	0.754918	0.142269	5.30628	1.12e-07	1.75e-06	8198.3	9254.58	8233.12	8021.48	8208.91	14111.4	11648.2	16715.8
959	Vstm4	52.3063	-3.01398	0.568019	-5.30613	1.12e-07	1.75e-06	70.5514	118.394	82.261	71.9211	49.2866	5.9267	16.1545	3.95548
960	Sdccag8	763.665	-0.842306	0.158821	-5.30349	1.14e-07	1.77e-06	1000.75	939.022	870.666	941.804	832.747	578.085	480.03	466.223
961	Cmtm7	4295.96	-0.749112	0.141262	-5.30301	1.14e-07	1.78e-06	5114.92	4417.78	4672.39	4983.55	6136.23	3065.25	2922.78	3054.75
962	Gpc2	834.48	-0.999588	0.188551	-5.30142	1.15e-07	1.79e-06	1256.24	1076.68	1080.36	950.05	778.181	552.822	511.099	470.397
963	Gm7536	2374.78	1.10254	0.208044	5.29953	1.16e-07	1.8e-06	1588.3	1819.15	1350.79	2176.63	1359.57	3431.44	2730.99	4541.35
964	Parp14	1644.18	1.02935	0.194239	5.29942	1.16e-07	1.8e-06	1158.67	1271.87	942.228	1439.21	1111.72	2817.18	2650.04	1762.49
965	Ptma	5274.31	0.799177	0.150804	5.29945	1.16e-07	1.8e-06	4591.5	4572.03	3523.4	3853.85	4092.92	7378.36	6056.31	8126.14
966	Atp1b3	7074.09	0.630193	0.118976	5.29679	1.18e-07	1.83e-06	5459.59	5839.39	5697.52	6325.67	6007.17	8803.91	8465.32	9994.11
967	Gmfg	1250.95	0.926572	0.174961	5.29588	1.18e-07	1.83e-06	1078.97	880.701	826.414	930.706	953.313	1961.06	1363.24	2013.21
968	Krt10	55.0163	2.20599	0.416556	5.29579	1.19e-07	1.83e-06	15.96	23.9087	21.6399	19.0332	34.0118	100.461	95.5202	129.596
969	Eif5	1627.97	-0.699947	0.132258	-5.2923	1.21e-07	1.87e-06	1758.67	2017.78	1935.18	1983.23	1824.73	1276.56	1146.77	1080.85
970	G6pdx	1939.66	0.948291	0.179274	5.2896	1.23e-07	1.89e-06	1582	1520.38	1025.92	1410.17	1659.24	3095.46	2790.45	2433.69
971	Jag1	48.0652	2.96144	0.559848	5.28972	1.23e-07	1.89e-06	3.49769	19.6915	17.6107	11.3093	13.3951	63.2311	84.0224	171.764
972	Myof	60.5735	7.71856	1.46079	5.28384	1.27e-07	1.95e-06	0	3.26195	0	0	0	150.098	94.3236	236.905
973	Tspo	1298.72	0.946828	0.17921	5.28334	1.27e-07	1.95e-06	1046.13	1150.39	807.29	787.189	1021.72	1983.34	1580.28	2013.39
974	Lifr	8577.19	0.874379	0.165669	5.27788	1.31e-07	2.01e-06	8330.85	6754.96	5991.13	4933.62	6665.55	11786.4	11865.9	12289.1
975	Fam89a	66.5567	-2.63217	0.499048	-5.27438	1.33e-07	2.05e-06	91.5566	94.1307	58.5136	153.4	93.0517	17.5933	20.353	3.85462
976	Capn2	272.721	1.22215	0.232158	5.26429	1.41e-07	2.16e-06	200.247	220.753	133.04	163.92	192.063	473.064	392.939	405.743
977	Rpl3	7683.59	0.748602	0.142304	5.26059	1.44e-07	2.2e-06	6071.67	6610.55	5561.1	7078.11	5284.69	10757.9	9183.53	10921.2
978	Catip	112.998	1.45723	0.277108	5.25871	1.45e-07	2.22e-06	76.2021	69.4833	70.9667	58.2234	68.2898	202.996	201.284	156.539
979	Tmem170b	4658.56	-0.85572	0.162724	-5.25873	1.45e-07	2.22e-06	6026.29	5781.89	5332.19	4740.96	6126.59	3751.26	3040.12	2469.18
980	Snx3	2750.09	0.982753	0.187151	5.25111	1.51e-07	2.31e-06	1920.6	1526.43	1743.7	2722.06	2151.3	3717.67	3935.11	4283.82
981	Immp2l	165.067	1.45252	0.276767	5.24817	1.54e-07	2.35e-06	83.2581	88.8903	86.3118	119.932	120.919	330.44	217.697	273.085
982	Rhbdf2	648.102	1.16225	0.221652	5.24357	1.58e-07	2.4e-06	556.64	393.473	537.701	303.515	418.703	907.776	918.731	1148.28
983	H2-DMb1	4034.26	0.837558	0.159765	5.24245	1.58e-07	2.41e-06	3584.37	3122.58	2838.4	2505.5	3521.95	6107.81	4840.37	5753.13
984	Gm20517	105.324	1.94189	0.370716	5.23822	1.62e-07	2.47e-06	58.3982	37.5269	66.4027	53.3118	43.3695	292.871	163.014	127.699
985	Serinc1	6964.94	-0.586332	0.112061	-5.23227	1.67e-07	2.55e-06	7927.53	7923.64	8002.56	7653.15	8313.77	5785.01	5112.2	5001.66
986	Aph1b	162.215	2.6095	0.498941	5.23007	1.69e-07	2.57e-06	99.924	70.7973	14.2222	44.3845	52.8967	377.364	501.11	137.02
987	Agmo	2271.12	-0.808863	0.154723	-5.22783	1.72e-07	2.6e-06	2719.42	2906.24	3055.17	2262.4	2583.62	1679.98	1319.63	1642.53
988	Stat1	2358	0.786594	0.150574	5.22397	1.75e-07	2.65e-06	1911.94	2112.87	1723.79	1544.04	1976.68	3543.47	2903.9	3147.32
989	Fggy	735.89	0.905448	0.17341	5.22143	1.78e-07	2.69e-06	669.478	530.066	584.458	527.881	458.983	1058.88	940.921	1116.46
990	Tmem194	415.638	1.11671	0.214387	5.20887	1.9e-07	2.87e-06	247.045	388.385	300.087	269.181	241.915	680.597	621.009	576.882
991	Mpc1	2198.12	-0.991559	0.190396	-5.20788	1.91e-07	2.89e-06	2363.97	2660.82	2556.67	3155.63	2748.69	1234.36	1035.86	1828.97
992	Mrpl28	785.97	0.982453	0.188884	5.20136	1.98e-07	2.99e-06	630.031	546.373	466.409	710.884	520.061	1168.23	965.728	1280.04
993	Slc15a2	314.927	1.5527	0.299071	5.19173	2.08e-07	3.14e-06	231.056	167.696	207.534	96.0806	210.509	682.126	564.251	360.166
994	Ifitm6	22.0763	4.69258	0.904836	5.18612	2.15e-07	3.24e-06	3.98519	0	1.70786	0	5.1852	49.5506	50.1221	66.0593
995	Bank1	2209.69	0.860767	0.166015	5.18487	2.16e-07	3.25e-06	1998.92	1511.02	1734.36	1396.5	1811.62	3063.43	2628.72	3532.96
996	Ptgfrn	38.8482	-3.0162	0.581761	-5.18461	2.16e-07	3.26e-06	57.2418	63.4011	57.1033	68.5195	47.0917	10.1939	7.23434	0
997	Themis2	4880.26	0.788827	0.152162	5.18414	2.17e-07	3.26e-06	4499.29	4009.45	3492.88	3212.4	3956.42	7395.3	5795.19	6681.18
998	Ly6a	85.4442	-2.25558	0.435698	-5.17695	2.26e-07	3.39e-06	135.692	154.213	135.723	75.4722	112.64	26.1696	36.0435	7.60072
999	Padi2	1690.35	-1.05343	0.203571	-5.17477	2.28e-07	3.42e-06	2613.33	2224.45	1720.53	1702.54	2226.44	1223.82	758.238	1053.42
1000	Hspa12a	155.318	-2.54463	0.492395	-5.16787	2.37e-07	3.55e-06	147.957	350.537	235.364	230.718	160.472	64.6403	8.85456	44.0052
1001	Apoc1	44.2478	4.506	0.873779	5.15691	2.51e-07	3.76e-06	1.34585	3.38306	0.877592	0	17.4422	159.508	52.07	119.355
1002	Cul1	3109.1	-0.625377	0.121292	-5.15596	2.52e-07	3.77e-06	3953.56	3644.65	3315.39	3399.61	3589.09	2247.74	2299.51	2423.24
1003	Trim47	1837.7	0.818024	0.158972	5.14572	2.66e-07	3.98e-06	1175.85	1564.74	1517.27	1643.32	1245.57	2729.98	2478.07	2346.83
1004	Gng12	1334.49	0.775284	0.150682	5.14516	2.67e-07	3.99e-06	1171.87	1108.79	928.543	992.032	1055.3	1800.01	1585.62	2033.78
1005	Rsad2	216.113	2.55078	0.496421	5.13834	2.77e-07	4.13e-06	121.37	48.809	154.657	18.2691	42.8917	539.334	341.484	462.09
1006	Dnajc18	1155.41	-1.01224	0.197183	-5.13349	2.84e-07	4.23e-06	1805.89	1344.75	1181.28	1162.07	1636.92	827.186	649.828	635.346
1007	Rere	1680.32	-0.758953	0.147848	-5.13333	2.85e-07	4.23e-06	2194.92	2136.63	2019.58	1930.9	1652.64	1252.74	1172.06	1083.14
1008	Siva1	266.498	1.17951	0.229778	5.13325	2.85e-07	4.23e-06	189.629	192.643	132.715	180.714	206.588	454.853	343.913	430.932
1009	Rpl18	3844.1	0.83938	0.163748	5.12606	2.96e-07	4.39e-06	2601.19	3276.28	2617.28	3433.38	2891.69	5332.39	4351.82	6248.8
1010	Pgap1	361.614	1.30869	0.255503	5.12202	3.02e-07	4.48e-06	222.545	152.663	187.895	299.403	301.1	546.553	587.838	594.911
1011	Fcer1g	23701.1	0.671713	0.131178	5.12064	3.05e-07	4.51e-06	17417.6	20466.9	17572.3	19717.6	21763.2	31389	27817.2	33465.1
1012	Kcnk12	285.791	-1.51307	0.295519	-5.12005	3.05e-07	4.52e-06	505.281	379.332	372.207	321.807	317.559	197.389	94.7666	97.9889
1013	Dlc1	548.608	1.00079	0.195591	5.11675	3.11e-07	4.59e-06	398.541	307.075	493.387	367.065	432.5	839.617	823.364	727.319
1014	Myl2	139.984	-1.47145	0.287565	-5.11693	3.11e-07	4.59e-06	227.798	169.058	186.021	161.568	178.451	81.7696	56.9085	58.2979
1015	Gm10401	272.249	-1.38335	0.270769	-5.10896	3.24e-07	4.78e-06	219.835	358.063	329.46	439.196	419.046	133.904	119.623	158.867
1016	Arsb	7903.42	-0.974645	0.19121	-5.09724	3.45e-07	5.08e-06	12851.1	10187.9	9033.94	9788.04	6571.71	4783.72	4597.41	5413.54
1017	Cd55	116.45	2.65364	0.520998	5.09338	3.52e-07	5.18e-06	8.81507	46.0657	58.9867	20.2055	58.7654	138.596	218.073	382.095
1018	Ap2s1	1103.86	0.841624	0.165451	5.08686	3.64e-07	5.36e-06	906.528	931.943	723.107	805.874	882.356	1655.74	1252.79	1672.56
1019	Fam46a	1490.28	0.979788	0.192752	5.08314	3.71e-07	5.46e-06	851.756	1282.29	1063.69	1401.97	858.81	2100.06	2156.1	2207.54
1020	Vat1	124.933	1.59353	0.313789	5.07835	3.81e-07	5.59e-06	46.5915	66.2561	74.7797	95.8883	68.9951	170.193	215.651	261.106
1021	Prim1	200.344	1.42395	0.280447	5.07744	3.83e-07	5.61e-06	90.6956	171.761	124.083	92.7271	135.868	366.067	342.993	278.56
1022	Atp2c1	5451.65	-0.703312	0.138593	-5.07464	3.88e-07	5.69e-06	6289.68	6401.76	6728.82	6082.2	6356.55	4387.47	3184.07	4182.67
1023	Mgat5	2355.13	-0.748091	0.147478	-5.07257	3.92e-07	5.75e-06	3205.23	2614.04	2578.66	2932.21	2568.61	1721.21	1808.84	1412.25
1024	Tnfsf12Tnfsf13	109.948	2.57378	0.507618	5.0703	3.97e-07	5.81e-06	52.487	16.4188	13.3756	55.9536	55.6811	328.951	130.325	226.39
1025	Tmem254a	358.431	-1.39097	0.274394	-5.06925	3.99e-07	5.84e-06	405.048	578.829	499.791	450.362	411.124	240.611	190.697	90.9875
1026	Zfp697	95.4914	-2.13071	0.420566	-5.06628	4.06e-07	5.92e-06	113.235	115.267	113.835	223.118	108.374	21.8373	42.1621	26.103
1027	Ly6e	17471.7	-0.715524	0.141252	-5.06557	4.07e-07	5.94e-06	18120.2	22717.7	19907.5	22028.2	19577.1	12690.6	10557.1	14175.3
1028	Prkca	988.239	-1.25056	0.246937	-5.0643	4.1e-07	5.97e-06	1256.55	746.407	1108.19	1810.33	1388.76	517.545	483.078	595.051
1029	Slc25a36	3257.24	0.702332	0.13876	5.06149	4.16e-07	6.06e-06	2976.52	2311.92	2458.32	2677.28	2763.43	4672.34	3856.4	4341.72
1030	Ctnnd2	372.315	1.563	0.308897	5.05996	4.19e-07	6.1e-06	183.954	137.281	381.192	153.128	218.006	574.188	670.46	660.31
1031	Ube2h	1244.51	-0.906797	0.179259	-5.05858	4.22e-07	6.14e-06	1836.64	1487.7	1540.47	1175.23	1492.9	813.161	688.467	921.547
1032	Txn2	1489.38	0.702939	0.13905	5.05529	4.3e-07	6.24e-06	1262.94	1299.34	1171.38	1066.62	1235.4	2063.41	2066.19	1749.77
1033	Wipi1	230.65	-1.09766	0.217233	-5.05292	4.35e-07	6.31e-06	299.516	321.697	302.007	262.996	255.066	138.951	130.974	133.992
1034	Arhgap4	3839.12	-0.847143	0.167757	-5.04982	4.42e-07	6.41e-06	5027.39	4742.78	3687.77	4976.79	4616.63	2996.84	2664.75	2000.01
1035	Rpl6	6405.09	0.790423	0.156543	5.04923	4.44e-07	6.42e-06	4998.99	5713.37	4688.95	5501.3	4235.46	9285.99	7103.65	9712.99
1036	Rnf141	1609.46	1.20547	0.238758	5.04894	4.44e-07	6.42e-06	1441.63	1342.44	670.743	1006.43	943.766	3008.07	1983.59	2478.99
1037	Mfsd1	5138.51	0.631333	0.125072	5.04777	4.47e-07	6.46e-06	4332.49	4247.9	4093.26	4809.76	3830.7	6559.84	7017.9	6216.22
1038	Afm	63.3301	-2.68417	0.532085	-5.04462	4.54e-07	6.56e-06	74.3643	105.833	55.9412	69.874	157.34	7.86129	21.091	14.3357
1039	Tmem150b	40.6451	2.64669	0.524777	5.04345	4.57e-07	6.59e-06	3.31084	20.2709	11.8696	12.8488	17.7194	82.3737	84.5924	92.1754
1040	Zbtb46	276.536	1.65999	0.329185	5.04275	4.59e-07	6.61e-06	71.2488	183.111	227.905	130.649	153.319	577.055	513.16	355.841
1041	Slc38a9	1223.38	-0.706991	0.140314	-5.03862	4.69e-07	6.75e-06	1498.84	1364.34	1479.76	1382.41	1423.91	936.045	766.312	935.391
1042	Rnf128	609.421	-0.920169	0.182677	-5.03713	4.73e-07	6.79e-06	829.224	843.988	714.668	626.968	677.089	360.107	371.401	451.924
1043	Slc26a2	1435.76	-0.932607	0.185217	-5.0352	4.77e-07	6.85e-06	2144.99	2045.99	1750.75	1431.53	1365.68	905.739	903.806	937.614
1044	Cd9	15293.7	-1.04482	0.207546	-5.03416	4.8e-07	6.89e-06	17750.2	20696.9	18232.5	19346.7	18730.7	8198.72	6084.08	13309.7
1045	Ss18	1990.01	-0.694052	0.137943	-5.03144	4.87e-07	6.98e-06	2541.22	2319.18	2307.93	2039.13	2418.91	1443.34	1563.41	1286.99
1046	Arrdc2	357.323	1.39499	0.277508	5.02684	4.99e-07	7.14e-06	302.035	190.135	130.569	244.097	248.154	654.32	655.819	433.458
1047	Coro1b	6442.1	0.571844	0.113771	5.02628	5e-07	7.15e-06	6002.79	5409.88	5303.04	5336.7	5192.15	8534.03	7717.45	8040.79
1048	Traf1	105.891	2.07161	0.412962	5.01648	5.26e-07	7.52e-06	32.7177	21.622	71.6096	43.5943	70.3713	208.088	195.154	203.97
1049	Evl	626.417	-1.00593	0.200581	-5.01507	5.3e-07	7.57e-06	875.166	784.971	723.765	723.375	767.471	489.594	373.807	273.186
1050	Notch2	4848.37	0.6967	0.138965	5.01348	5.35e-07	7.63e-06	3748.83	4129.05	3919.22	3360.44	4510.45	7014.87	6193.06	5911.01
1051	Dst	3809.84	-0.732832	0.146195	-5.0127	5.37e-07	7.65e-06	4810.22	4625.32	4636.24	4204.1	4082.46	2418.61	2432.24	3269.54
1052	Pld1	3438.9	-0.800785	0.159868	-5.00903	5.47e-07	7.79e-06	3859.58	4069.75	3464.6	4265.66	4816.36	2791.15	2198.85	2045.27
1053	Sipa1l1	398.976	-1.39457	0.27844	-5.00853	5.48e-07	7.8e-06	455.665	738.176	470.517	482.718	465.923	215.981	256.987	105.839
1054	Spats2l	79.1195	2.86021	0.571333	5.0062	5.55e-07	7.89e-06	1.26655	18.9292	39.1082	34.3845	23.5162	152.229	223.557	139.965
1055	Rbfox1	26.5008	-4.81591	0.962291	-5.00463	5.6e-07	7.95e-06	29.1811	39.2624	18.0773	72.1927	47.8198	0.484247	2.72319	2.26543
1056	Slc2a3	518.842	1.77275	0.354658	4.99847	5.78e-07	8.2e-06	358.794	214.798	295.953	90.3458	402.82	1156.25	846.324	785.455
1057	Vrk1	1017.73	-0.868491	0.173797	-4.99715	5.82e-07	8.25e-06	1454.12	1149.65	1130.69	1208.58	1195.09	816.616	613.828	573.284
1058	Rps3	7251.39	0.817714	0.163788	4.99252	5.96e-07	8.43e-06	5233.55	5963.77	5082.48	6846.92	5054.58	9782.43	8206.25	11841.2
1059	Serf2	4039.92	0.714557	0.143129	4.9924	5.96e-07	8.43e-06	2962.11	3738.39	2843.69	3274.41	3457.47	5614.97	4730.99	5697.31
1060	Xaf1	547.247	1.12399	0.225831	4.97712	6.45e-07	9.12e-06	364.138	432.839	321.588	356.917	418.477	1039.39	557.164	887.459
1061	1700047I17Rik2	93.9472	-9.18739	1.8497	-4.96697	6.8e-07	9.6e-06	73.1172	2.1668	263.293	271.451	141.55	0	0	0
1062	Gnpda1	2781.93	0.856918	0.172561	4.96588	6.84e-07	9.65e-06	2362.44	2346.93	1555.36	2094.43	2306.78	4388.45	3371.1	3829.93
1063	Mrap	27.7957	4.18119	0.842222	4.96447	6.89e-07	9.7e-06	0	0.463319	4.99851	11.2869	3.52064	59.1387	41.8157	101.142
1064	Sdccag3	2125.59	-0.800283	0.161198	-4.96459	6.88e-07	9.7e-06	2055.48	2623.52	2181.14	2909.87	2880.04	1476.86	1491.05	1386.77
1065	Trp53i11	1065.73	-0.739796	0.149035	-4.96392	6.91e-07	9.72e-06	1426.14	1240.7	1237.61	1277.23	1094.71	803.97	718.644	726.837
1066	Qk	2264.8	-1.04274	0.210157	-4.9617	6.99e-07	9.82e-06	2371.9	3087.41	2865.89	2896.74	2786.51	1336.22	890.808	1882.93
1067	Psmb8	1503.34	0.755002	0.15219	4.96091	7.02e-07	9.85e-06	1266.59	1363.77	1175.18	978.417	1186.87	2093.38	1841.37	2121.1
1068	Tiparp	577.993	1.04224	0.210126	4.96009	7.05e-07	9.88e-06	507.128	403.258	315.376	351.98	485.221	760.659	802.914	997.41
1069	Bhlhe41	7779.74	-0.941647	0.189977	-4.95664	7.17e-07	1e-05	8251.61	8929.18	9243.5	8613.44	12362.5	4382.21	4011.78	6443.63
1070	Prex1	5659.64	-0.676359	0.136485	-4.95554	7.21e-07	1.01e-05	6886.65	6061.42	6179.89	7571.66	6206.17	4258.16	3646.9	4466.23
1071	Ppm1f	1540.34	-1.19279	0.240821	-4.95302	7.31e-07	1.02e-05	2885.26	2036.19	1642.37	1406.11	1804.71	1045.46	895.565	607.064
1072	Uap1l1	2342.36	1.14067	0.230534	4.94796	7.5e-07	1.05e-05	2308.36	1575.29	1077.74	1711.27	1391.64	3516.38	2756.78	4401.43
1073	Strada	1578.08	-0.789073	0.159502	-4.9471	7.53e-07	1.05e-05	1995.69	2101.04	1558.9	1749.65	1958.56	1161.68	930.535	1168.57
1074	Clgn	501.497	-1.35014	0.273084	-4.94405	7.65e-07	1.07e-05	719.117	693.812	596.029	599.456	652.454	403.325	196.823	150.959
1075	Fam49a	853.524	1.13508	0.229586	4.94405	7.65e-07	1.07e-05	399.662	747.371	502.324	539.659	757.439	1253.74	1511.54	1116.45
1076	Gcat	74.0899	2.04353	0.413474	4.94235	7.72e-07	1.07e-05	22.5702	27.1022	30.7023	51.9031	35.7216	98.6987	121.528	204.493
1077	Acvr1	348.876	-1.21956	0.246885	-4.93979	7.82e-07	1.09e-05	554.811	370.15	452.989	411.232	442.283	250.648	182.207	126.687
1078	Synpo	93.6998	2.26682	0.458957	4.93907	7.85e-07	1.09e-05	13.5216	35.0812	33.5092	59.3633	49.8445	130.949	144.223	283.106
1079	H3f3a	4609.93	0.823308	0.167003	4.92991	8.23e-07	1.14e-05	3484.17	3658.31	3077.7	4635.81	3026.86	6320.7	5698.81	6977.11
1080	Stard3	4304.72	-0.745264	0.151168	-4.93003	8.22e-07	1.14e-05	5471.61	5378.31	4721.2	4405.81	5385.47	3561.4	2566.03	2947.95
1081	Limd1	1059.64	0.913314	0.185307	4.92866	8.28e-07	1.15e-05	894.212	598.058	755.308	751.369	983.361	1633.52	1403.83	1457.49
1082	Ikzf1	4858.23	-0.833431	0.169105	-4.92847	8.29e-07	1.15e-05	5926.27	6251.05	6671.69	5521.54	4690.39	3551.27	2559.25	3694.37
1083	Ublcp1	752.568	-1.17657	0.238801	-4.92701	8.35e-07	1.15e-05	1036.1	932.618	765.454	981.122	1040.38	571.739	263.986	429.151
1084	Lrrc49	106.056	2.04975	0.416112	4.92595	8.4e-07	1.16e-05	46.378	67.5525	28.7816	33.6066	66.0609	108.806	238.411	258.85
1085	Gp49a	104.628	5.11349	1.03823	4.9252	8.43e-07	1.16e-05	3.98783	3.80488	20.829	10.0351	0	332.86	250.471	215.038
1086	Rps15a	2469.05	1.08696	0.220819	4.92242	8.55e-07	1.18e-05	1386.02	1623.77	1712.93	2527.35	1426.08	3727.43	2794.64	4554.17
1087	Klf6	3235.1	0.759955	0.154431	4.92099	8.61e-07	1.19e-05	2408.94	2986.35	2507.39	2305.47	2615.29	4427.4	3587.6	5042.35
1088	Foxk2	442.004	-1.03785	0.211094	-4.91652	8.81e-07	1.21e-05	543.158	541.251	563.513	535.363	565.112	304.444	311.625	171.57
1089	Pilrb1	190.283	6.6808	1.35889	4.91635	8.82e-07	1.21e-05	15.9377	0	0	4.07975	5.06136	595.633	422.999	478.555
1090	Pld3	5809.43	0.674635	0.137307	4.91334	8.95e-07	1.23e-05	5285.77	5045.54	4608.39	4028.65	4765.99	7977.69	6730.06	8033.35
1091	Kif1a	139.785	2.90695	0.592273	4.90813	9.19e-07	1.26e-05	37.1364	54.796	80.291	8.67164	22.6487	302.662	90.9166	521.157
1092	Usp35	698.861	-1.41789	0.288922	-4.90753	9.22e-07	1.27e-05	911.847	1046.71	580.48	1208.82	825.399	523.462	258.935	235.228
1093	Vps37b	1197.28	-0.869298	0.177366	-4.90116	9.53e-07	1.31e-05	1585.03	1593.66	1379.97	1290.61	1364.82	977.957	640.109	746.085
1094	Thbs2	112.719	-2.10269	0.429518	-4.89547	9.81e-07	1.34e-05	206.613	143.793	169.053	143.189	137.791	28.9212	64.3915	8.00312
1095	Il6st	8278.15	-0.853973	0.174625	-4.89033	1.01e-06	1.38e-05	11692.1	10091.2	10563.7	7738.42	9619.47	5726.97	4302.04	6491.28
1096	Narf	2025.79	-0.77734	0.158965	-4.89002	1.01e-06	1.38e-05	2338.28	2829.45	2077.52	2542.88	2206.11	1192.65	1477.58	1541.88
1097	Insig2	1012.46	-0.732997	0.14997	-4.88763	1.02e-06	1.39e-05	1203.17	1274.55	1292.86	1048.86	1134.08	670.027	771.748	704.404
1098	Glis3	354.529	-1.61406	0.330383	-4.8854	1.03e-06	1.41e-05	381.777	547.655	739.114	253.446	457.806	172.7	186.588	97.1485
1099	Gpr176	63.966	3.34594	0.685403	4.88171	1.05e-06	1.43e-05	1.33219	3.79976	11.6153	27.8975	27.016	80.6457	220.072	139.349
1100	Tsg101	1657.21	-0.732529	0.150093	-4.88051	1.06e-06	1.44e-05	1864.86	1899.64	1870.52	2007.8	2114.38	1316.58	1243.7	940.24
1101	Rpl8	3467.23	0.904058	0.185249	4.88024	1.06e-06	1.44e-05	2318.4	2733.01	2406.82	3505.8	2096.98	4921.1	4164.99	5590.77
1102	Rnf135	1056.92	-0.863111	0.177046	-4.87507	1.09e-06	1.48e-05	1330.14	1255.48	1318.04	1226	1245.86	869.136	698.282	512.44
1103	Gdpd5	231.588	1.96079	0.402287	4.87411	1.09e-06	1.48e-05	225.203	120.486	53.8991	64.7031	95.0558	513.216	472.863	307.281
1104	Tnfrsf23	328.134	-1.08876	0.223602	-4.86919	1.12e-06	1.52e-05	396.077	518.185	353.84	431.216	353.748	187.99	218.707	165.31
1105	Slc7a8	16106.9	-0.791973	0.162798	-4.86475	1.15e-06	1.55e-05	24214.6	19894.5	18321	14732.9	18538.7	11976.2	10894.1	10283
1106	Abr	1379.54	-0.914078	0.187987	-4.86246	1.16e-06	1.57e-05	2215.15	1622.47	1441.44	1564.09	1522.85	986.872	731.169	952.26
1107	Stmn1	623.243	1.04518	0.214984	4.86164	1.16e-06	1.58e-05	490.151	579.982	339.02	443.483	374.226	1045.24	773.016	940.825
1108	Rac3	489.387	1.06526	0.21948	4.85354	1.21e-06	1.64e-05	238.54	398.884	339.28	435.504	325.929	716.365	808.777	651.818
1109	Ppp2r1b	1625.83	-0.761541	0.157033	-4.84956	1.24e-06	1.67e-05	2194.88	2065.46	1809.92	1873.55	1675.13	1297.14	1112	978.532
1110	Gng2	2526.33	0.72749	0.150111	4.84635	1.26e-06	1.7e-05	2022.53	1975.16	1863.3	1867.71	2398.81	3577.8	2860.32	3645.02
1111	Rpl26	3632.97	0.959375	0.198019	4.84486	1.27e-06	1.71e-05	2125.75	2613.55	2657.88	3807.39	2204.2	5000.44	4619.36	6035.19
1112	Scand1	308.217	0.950247	0.1962	4.84326	1.28e-06	1.72e-05	215.234	207.489	229.468	240.9	244.065	452.648	375.481	500.447
1113	Gm10288	1308.53	0.909228	0.187808	4.84125	1.29e-06	1.73e-05	1011.63	1002.09	839.415	1226.08	835.139	1740.13	1544.81	2268.93
1114	2022-03-10	44.9738	-4.27785	0.883614	-4.84131	1.29e-06	1.73e-05	17.1646	59.1788	58.1136	114.456	102.579	0	8.29952	0
1115	Gm4070	1213.92	0.969444	0.200412	4.83724	1.32e-06	1.77e-05	991.475	813.386	1019.01	819.47	834.721	2351.17	1561.69	1320.45
1116	Cmpk2	113.597	2.4367	0.504071	4.83405	1.34e-06	1.8e-05	69.2466	59.1827	19.0971	15.9625	52.2808	300.954	288.887	103.169
1117	Cdk5r1	205.813	-1.69327	0.350887	-4.82567	1.4e-06	1.87e-05	262.344	182.599	258.697	304.97	372.261	108.074	44.6041	112.956
1118	Gaa	5837.66	0.820254	0.169992	4.82526	1.4e-06	1.87e-05	5596.27	5064.5	3981.98	3578.53	4462.64	9016.81	7890.63	7109.92
1119	2210011C24Rik	24.5733	3.52885	0.732001	4.82082	1.43e-06	1.91e-05	0	8.43623	9.96401	3.3171	4.145	48.5102	48.8846	73.3294
1120	Pydc3	185.575	1.51658	0.314581	4.82095	1.43e-06	1.91e-05	85.1707	101.932	136.159	119.79	107.716	465.697	277.693	190.44
1121	Slc2a9	162.706	-1.31726	0.27351	-4.81613	1.46e-06	1.96e-05	221.716	205.609	239.118	201.169	177.706	66.4917	97.1299	92.7128
1122	Cpq	589.305	1.40458	0.29211	4.80839	1.52e-06	2.03e-05	464.012	362.508	248.187	540.537	210.562	867.703	1182.86	838.07
1123	Dock4	1400.26	-1.17972	0.245388	-4.80758	1.53e-06	2.04e-05	2158.85	1892.21	1542.79	1755	1489.53	805.647	450.334	1107.73
1124	Ly86	18859.1	-0.616632	0.128293	-4.80642	1.54e-06	2.05e-05	19205.6	21952.9	20882.5	22682.8	23705.1	14972.8	12460.8	15010.4
1125	Ubl3	2150.98	-0.753399	0.156918	-4.80124	1.58e-06	2.1e-05	2825.86	2675.2	2228.16	2582.09	2360.67	1418.36	1301.36	1816.14
1126	Abhd3	196.903	-1.37419	0.286805	-4.79138	1.66e-06	2.2e-05	364.552	237.651	212.343	249.669	215.833	117.628	79.8788	97.6711
1127	Yod1	969.678	-0.738683	0.154174	-4.79124	1.66e-06	2.2e-05	1022.44	1148.14	1025.83	1237.81	1266.21	708.673	631.771	716.543
1128	Apbb2	932.342	-1.01128	0.21108	-4.79096	1.66e-06	2.2e-05	1352.16	1313.36	1121.28	960.552	978.535	574.885	421.76	736.195
1129	Eif4g2	9443.72	-0.583651	0.121892	-4.78826	1.68e-06	2.23e-05	11100.1	11448.9	10349.2	10248.8	10779.2	6799.51	6662.86	8161.28
1130	Cdc42ep1	44.7047	-3.44379	0.719394	-4.78707	1.69e-06	2.24e-05	53.0643	28.1531	127.598	65.7577	67.6083	3.37353	12.0829	0
1131	Phf11d	728.472	0.936262	0.19563	4.78589	1.7e-06	2.25e-05	537.596	557.021	554.041	444.169	612.081	1154.91	772.876	1195.08
1132	Ppp2r5b	602.758	0.756123	0.157982	4.78613	1.7e-06	2.25e-05	477.708	510.151	478.007	498.518	425.586	835.018	736.815	860.265
1133	RP23-293I7.1	500.642	-1.03674	0.216621	-4.78597	1.7e-06	2.25e-05	663.582	722.12	527.71	485.495	708.202	355.378	302.69	239.959
1134	E2f1	158.799	1.68319	0.351769	4.78492	1.71e-06	2.26e-05	52.3037	86.3446	116.966	77.787	103.328	294.52	385.116	154.024
1135	Cd2ap	585.853	-1.16426	0.243353	-4.78425	1.72e-06	2.26e-05	954.309	675.063	649.84	876.37	552.048	430.249	297.092	251.856
1136	Smim14	2320.33	0.65765	0.137594	4.77964	1.76e-06	2.32e-05	1957.51	1930.6	1605.12	1931.93	2114.95	3235.54	2902.54	2884.43
1137	Apbb1ip	2357.82	-0.929809	0.194556	-4.77913	1.76e-06	2.32e-05	2602.3	2756.31	2400.26	3334.83	3227.57	1310.31	1208.66	2022.32
1138	Ripk2	736.264	-0.953738	0.199579	-4.77875	1.76e-06	2.32e-05	797.637	712.902	1092.03	996.746	905.264	552.749	428.445	404.331
1139	Traf3ip3	2059.24	-0.738172	0.154576	-4.77547	1.79e-06	2.36e-05	2655.73	2563.03	2341.89	2107.82	2462.65	1677.8	1472.74	1192.29
1140	Bco2	1577.44	-0.864558	0.181057	-4.77506	1.8e-06	2.36e-05	2142.72	1894.71	1646.16	1456.33	2348.86	1079.9	970.479	1080.34
1141	Ldb1	765.663	-0.874195	0.183072	-4.77514	1.8e-06	2.36e-05	883.772	861.393	955.628	1049.39	876.261	629.054	455.149	414.659
1142	Lrrc39	234.084	-1.10681	0.231815	-4.77454	1.8e-06	2.36e-05	264.979	264.979	279.859	289.399	368.559	141.536	140.438	122.924
1143	Prrg1	167.427	1.48686	0.311577	4.77205	1.82e-06	2.39e-05	81.2871	65.3812	123.503	99.4186	132.67	268.014	347.887	221.251
1144	Gimap1	303.237	-1.6468	0.34525	-4.76988	1.84e-06	2.41e-05	438.598	333.912	394.371	402.1	511.713	179.594	154.646	10.9593
1145	Hnmt	910.874	-0.758065	0.158934	-4.7697	1.85e-06	2.41e-05	1029.23	1080.25	977.463	1044.69	1244.22	696.795	561.862	652.488
1146	Pik3r1	3015.25	-0.937811	0.196624	-4.76956	1.85e-06	2.41e-05	3952.81	4110.89	3400.41	4005.76	2881.82	2008.67	1356.38	2405.24
1147	Camsap1	857.431	-1.36429	0.286107	-4.76847	1.86e-06	2.42e-05	1580.17	1082.73	1188.57	919.515	803.988	449.174	610.186	225.119
1148	Tgfbrap1	1341.49	-0.609093	0.127785	-4.76655	1.87e-06	2.45e-05	1577.31	1550.85	1503.09	1589.63	1471.44	952.069	994.53	1092.99
1149	Nek7	2129.74	-0.811439	0.17028	-4.76532	1.89e-06	2.46e-05	2516.69	2403.07	2797.79	2568.81	2387.21	1424.18	1110.02	1830.14
1150	Naip2	1873.13	-0.73425	0.154175	-4.76245	1.91e-06	2.49e-05	2553.74	2285.58	1863.52	2234.14	2086.74	1495.53	1272.82	1192.94
1151	Ifi202b	32.5918	2.99703	0.629426	4.76152	1.92e-06	2.5e-05	0	11.4102	9.99885	11.0451	11.168	68.9731	62.4349	85.7043
1152	Pigs	2727.96	0.845204	0.177532	4.76086	1.93e-06	2.51e-05	2404.76	2468.75	2119.1	1487.67	2026.17	4139.05	3705.11	3473.11
1153	Cd99	42.0976	3.07781	0.646565	4.76025	1.93e-06	2.51e-05	9.24664	3.29274	12.0622	24.6745	6.41096	78.8814	51.1994	151.013
1154	Kif5a	95.7345	2.4998	0.525324	4.75859	1.95e-06	2.53e-05	69.3201	12.4796	10.7715	44.7359	39.1814	186.332	214.867	188.189
1155	Oat	1544.62	0.681005	0.143134	4.7578	1.96e-06	2.54e-05	1181.16	1270.34	1224.91	1188.68	1421.07	2004.83	1794.19	2271.79
1156	Bend5	90.1973	-2.20023	0.462639	-4.75583	1.98e-06	2.56e-05	139.864	92.9717	140.033	156.992	100.115	32.6158	10.215	48.7712
1157	Cstb	1096.67	1.03053	0.216947	4.75016	2.03e-06	2.63e-05	556.709	936.15	737.126	884.925	815.77	1482.49	1252.67	2107.52
1158	9130023H24Rik	383.615	-1.1358	0.239179	-4.74874	2.05e-06	2.65e-05	455.536	497.821	492.148	362.866	613.212	235.015	257.262	155.059
1159	Gm4617	15.5839	-6.59262	1.38839	-4.74841	2.05e-06	2.65e-05	28.0533	34.7229	15.0449	29.2126	17.6376	0	0	0
1160	Mttp	222.213	-1.30762	0.275872	-4.73994	2.14e-06	2.76e-05	386.432	279.029	275.663	278.945	205.321	93.259	115.192	143.864
1161	Ttc7	1816.31	-0.962602	0.203191	-4.73742	2.16e-06	2.79e-05	2757.35	2544.43	1803.86	1806.24	2209.32	1411.35	1122.39	875.548
1162	Pwwp2a	857.953	-0.995958	0.210648	-4.72807	2.27e-06	2.92e-05	1014.72	918.011	930.475	1214.3	1206.69	709.534	436.482	433.408
1163	Ctsh	16515.6	0.571468	0.120883	4.72745	2.27e-06	2.93e-05	13999.6	14808.7	12131.9	14275.6	14628.9	21937.2	19249.5	21093.5
1164	Syne2	377.696	1.67227	0.353779	4.72689	2.28e-06	2.93e-05	154.273	193.581	229.854	192.832	267.859	1016.41	722.88	243.874
1165	Mfsd11	4261.02	0.823857	0.174401	4.72393	2.31e-06	2.97e-05	3196.72	3756.99	2804.23	3325.72	3431.58	5880.49	4417.98	7274.48
1166	Chst15	773.33	-1.00327	0.212395	-4.7236	2.32e-06	2.98e-05	1175.94	1061.95	973.871	816.804	731.462	558.483	374.527	493.604
1167	Psen2	545.192	0.999977	0.21171	4.72334	2.32e-06	2.98e-05	461.016	300.146	306.832	464.171	451.392	759.758	801.892	816.329
1168	Vasp	1211.62	-0.986954	0.20902	-4.72181	2.34e-06	3e-05	1504.13	1337	1252.74	1636.53	1703.82	926.643	508.683	823.445
1169	Athl1	315.722	1.60794	0.341009	4.71523	2.41e-06	3.09e-05	233.849	145.321	67.0515	247.369	201.698	572.549	512.605	545.332
1170	Adipor1	4693.36	0.616016	0.130672	4.71421	2.43e-06	3.11e-05	3919.46	3354.89	3986.13	4331.2	3975.64	6514.79	5798.67	5666.13
1171	Rpl29	2245.26	0.921983	0.195752	4.70995	2.48e-06	3.17e-05	1481.05	1766.08	1561.35	2344.72	1250.47	3143.63	2972.97	3441.8
1172	Hps4	3998.81	-0.967387	0.205623	-4.70466	2.54e-06	3.25e-05	6217.2	5685.61	3490.1	4420.62	4663.76	2989.17	1930.94	2593.05
1173	Fxyd5	246.543	1.67423	0.356061	4.70209	2.58e-06	3.29e-05	77.5249	221.282	115.517	129.057	136.18	612.473	440.541	239.768
1174	Tmem25	24.2825	3.18683	0.677735	4.70219	2.57e-06	3.29e-05	4.97269	9.28862	3.10319	6.03142	6.20052	24.1143	80.9094	59.6401
1175	Rpl9	4097.94	0.847678	0.180612	4.69336	2.69e-06	3.43e-05	2549.02	3378.16	2988.24	4093.92	2745.33	5578.62	4840.01	6610.22
1176	Dock1	919.461	0.776138	0.165557	4.68804	2.76e-06	3.51e-05	798.578	735.171	670.212	638.062	778.458	1302.98	1033.88	1398.35
1177	Tdp2	249.224	1.24243	0.265162	4.68556	2.79e-06	3.55e-05	179.038	125.971	226.658	115.294	176.453	403.293	360.048	407.035
1178	Bcap29	1075.43	-0.708941	0.151322	-4.68499	2.8e-06	3.56e-05	1253.65	1303.03	1111.3	1452.64	1169.6	792.077	723.532	797.627
1179	Ube2a	536.22	-1.02172	0.218137	-4.68384	2.82e-06	3.58e-05	596.683	609.422	618.52	818.574	658.407	232.371	361.765	394.019
1180	Lrch1	844.395	-0.909841	0.194288	-4.68294	2.83e-06	3.59e-05	1347.25	885.174	956.866	1065.02	862.149	571.896	476.053	590.751
1181	Hist3h2ba	86.3183	1.80505	0.38576	4.67921	2.88e-06	3.65e-05	22.3834	43.8487	50.929	64.0596	39.3101	137.207	130.392	202.416
1182	Cnot8	3916.81	-0.661284	0.141334	-4.67889	2.88e-06	3.65e-05	4611.56	4829.35	3907.11	4631.97	4720.04	2943.16	2454.76	3236.54
1183	Cmya5	165.788	-1.54504	0.330415	-4.67606	2.92e-06	3.7e-05	226.733	274.462	177.971	225.3	182.659	49.4303	65.1021	124.644
1184	Wdr44	1161.94	-0.79477	0.170033	-4.67421	2.95e-06	3.73e-05	1490.41	1355.01	1298.96	1586.29	1190.7	922.594	802.475	649.049
1185	Rps27a	5174.95	0.804123	0.172251	4.66832	3.04e-06	3.84e-05	3584.09	3846.71	3777.35	5422.17	3581.09	6792	6304.03	8092.12
1186	Rps20	2279.78	0.966621	0.207132	4.66669	3.06e-06	3.87e-05	1256.83	1794.91	1503.15	2435.71	1407.94	3478.44	3383.2	2978.02
1187	Mvp	1559.47	0.94414	0.202329	4.66635	3.07e-06	3.87e-05	1357.9	1459.75	894.748	931.709	1141.17	2356.98	1808.1	2525.44
1188	Ocln	105.942	-2.10534	0.451539	-4.66258	3.12e-06	3.94e-05	125.735	224.542	131.707	153.371	111.855	61.3272	17.9205	21.0779
1189	Nptn	4847.7	-0.618432	0.132755	-4.65846	3.19e-06	4.01e-05	5093.42	6054.47	5686.33	6104.92	4953.85	3769.85	3810.73	3308.05
1190	Epsti1	574.282	0.86294	0.185249	4.65828	3.19e-06	4.01e-05	389.51	391.34	404.02	474.533	532.872	840.385	696.964	864.635
1191	Aars	3100.47	-0.736157	0.158064	-4.65734	3.2e-06	4.03e-05	4713.84	3456.45	3283.84	3220.38	3562.69	2290.34	2092.63	2183.56
1192	Fam105a	412.797	-1.09487	0.235272	-4.65364	3.26e-06	4.1e-05	452.646	594.098	462.719	683.991	386.092	222.761	266.472	233.597
1193	Gde1	1539.19	-0.6838	0.146956	-4.65308	3.27e-06	4.11e-05	1915.7	1697.79	1583.42	2069.52	1702.89	1063.22	1197.24	1083.72
1194	Ephx1	475.736	0.865414	0.186154	4.6489	3.34e-06	4.19e-05	397.772	375.334	287.747	335.672	420.347	641.233	666.502	681.281
1195	Gas2l3	228.221	1.55407	0.33437	4.64776	3.36e-06	4.21e-05	127.336	230.322	104.235	97.0222	100.946	497.034	290.547	378.324
1196	Myo1c	2065.46	0.850815	0.183308	4.64144	3.46e-06	4.33e-05	2138	1663.61	1381.79	1376.87	1372.67	2873.8	2532.85	3184.07
1197	Adam17	6035.46	-0.678962	0.146353	-4.6392	3.5e-06	4.37e-05	8089.46	7629.49	6704.58	5621.55	7076.22	4638.2	4134.21	4389.96
1198	Itgav	4524.3	-0.965293	0.208076	-4.63913	3.5e-06	4.37e-05	4988.96	5158.12	5823.63	5435.21	6247.71	2715.39	1852.45	3972.9
1199	Eef1b2	2245.01	0.848898	0.183072	4.63695	3.54e-06	4.42e-05	1492.96	1698.29	1604.79	2259.27	1565.75	2889.04	2650.07	3799.89
1200	Trp53bp2	738.06	-0.734676	0.158449	-4.63668	3.54e-06	4.42e-05	969.739	889.529	770.393	870.614	849.902	554.572	540.813	458.92
1201	Gm3239	66.6064	-2.24884	0.485031	-4.63649	3.54e-06	4.42e-05	86.384	110.356	52.5107	138.582	89.9601	27.7883	19.4647	7.80567
1202	Zfp217	1184.93	0.973669	0.210033	4.63579	3.56e-06	4.43e-05	827.747	680.42	968.133	1089.92	773.596	1627.39	1316.75	2195.47
1203	Atox1	1420.8	0.931596	0.200988	4.63508	3.57e-06	4.44e-05	1100.8	1087.08	926.782	1129.32	1043.78	1835.33	1459.09	2784.22
1204	Ap1b1	6669.85	0.770063	0.166186	4.63374	3.59e-06	4.47e-05	6123.29	5317.5	4910.18	5458.62	4579.34	10682	9382.89	6904.91
1205	Phospho1	67.7741	-3.09729	0.668734	-4.63158	3.63e-06	4.51e-05	84.2072	97.076	93.4778	112.802	121.951	0.815828	28.2623	3.60111
1206	mt-Co3	22202.1	0.623109	0.134571	4.63033	3.65e-06	4.53e-05	15282.4	18578.1	17633.1	20635.7	20173.9	28211.2	27031.5	30070.6
1207	Dusp16	879.229	0.822533	0.17769	4.62904	3.67e-06	4.56e-05	825.85	668.166	693.076	513.872	716.508	1230.86	1252.99	1132.5
1208	Chp2	39.131	3.47289	0.750363	4.62828	3.69e-06	4.57e-05	23.8976	8.15909	0.835059	2.01488	6.85362	85.6079	61.7899	123.89
1209	Pmf1	239.19	1.38718	0.299953	4.62466	3.75e-06	4.65e-05	250.045	127.835	94.45	134.453	141.367	393.803	362.963	408.601
1210	Rpl22	1125.57	1.06694	0.230732	4.62416	3.76e-06	4.66e-05	636.003	856.084	824.103	1099.22	568.225	1619.2	1322.93	2078.77
1211	Tceal1	294.89	-1.00681	0.217958	-4.61928	3.85e-06	4.76e-05	342.127	393.183	368.057	352.548	364.632	226.104	150.216	162.25
1212	Rabep1	1120.27	0.644253	0.139478	4.61902	3.86e-06	4.76e-05	964.936	970.405	806.117	953.403	932.097	1535.18	1378.62	1421.4
1213	Ccdc134	388.55	1.4187	0.307162	4.61874	3.86e-06	4.77e-05	279.275	283.115	248.069	126.256	250.546	606.805	399.979	914.357
1214	Nmd3	1782.89	0.792326	0.171605	4.61716	3.89e-06	4.8e-05	1332.34	1282.16	1425.83	1390.51	1544.89	1898.79	2316.62	3072.02
1215	Jph3	293.994	-1.16659	0.252849	-4.61379	3.95e-06	4.87e-05	362.703	295.684	383.331	318.447	496.714	200.032	137.342	157.701
1216	Tlr2	5579.72	0.717332	0.155523	4.61238	3.98e-06	4.9e-05	4938.45	4783.36	4387.71	4206.06	4139.47	7049.15	6049.41	9084.11
1217	Fbxw4	1034.6	-0.632682	0.137323	-4.60727	4.08e-06	5.02e-05	1094.3	1263.12	1189.69	1199.78	1225.96	818.171	754.5	731.243
1218	Mars	2132.51	-0.902223	0.195824	-4.60731	4.08e-06	5.02e-05	3658.64	2545.47	2372.58	1983.51	2352.68	1455.5	1257.29	1434.45
1219	Crot	2041.84	-0.6821	0.148055	-4.60708	4.08e-06	5.02e-05	2123.83	2416.42	2600.31	2337.74	2428.64	1564.95	1650	1212.79
1220	Specc1l	994.5	0.9491	0.206039	4.60641	4.1e-06	5.03e-05	544.048	596.916	886.806	788.582	861.503	1352.9	1243.8	1681.45
1221	Nupr1	353.921	-1.23331	0.268042	-4.60119	4.2e-06	5.15e-05	441.193	448.735	545.851	350.719	471.58	128.618	271.22	173.451
1222	Card11	123.706	-1.86245	0.404933	-4.59941	4.24e-06	5.19e-05	181.195	267.596	141.847	153.39	100.656	28.0224	53.1919	63.7512
1223	2810006K23Rik	546.544	-0.906935	0.19735	-4.59557	4.32e-06	5.29e-05	669.506	647.513	695.904	557.637	747.294	438.063	300.641	315.793
1224	Adcy4	22.1276	4.10284	0.892937	4.59477	4.33e-06	5.3e-05	0	1.62007	4.20124	4.95875	4.35535	70.0374	8.82515	83.0229
1225	Hpcal1	539.979	0.986751	0.215231	4.58462	4.55e-06	5.56e-05	306.773	460.643	330.512	523.403	349.744	790.501	743.41	814.843
1226	Sft2d1	7421.04	-0.618547	0.135032	-4.58074	4.63e-06	5.66e-05	9243.73	8761.34	7786.71	7844.52	9041.4	5996.15	4770.59	5923.9
1227	Gngt2	1415.46	-0.745292	0.162766	-4.57891	4.67e-06	5.71e-05	1598.96	1730.06	1412.27	1623.68	1980.08	1141.27	929.25	908.15
1228	Tlr1	946.12	0.944279	0.206269	4.57789	4.7e-06	5.73e-05	689.566	612.591	488.545	815.007	908.576	1355.69	1397.23	1301.75
1229	Rpl17	1693.84	0.955748	0.208783	4.57771	4.7e-06	5.73e-05	1047.99	1305.47	1236.78	1730.3	937.016	2468.31	1994.69	2830.17
1230	Slc35e3	386.345	-1.24589	0.272335	-4.57483	4.77e-06	5.8e-05	350.293	416.945	659.856	425.738	620.717	264.666	193.576	158.97
1231	Rps13	1812.34	0.957204	0.209275	4.57392	4.79e-06	5.82e-05	955.289	1412.88	1204.22	1937.46	1185.37	2688.91	2407.14	2707.47
1232	Casp8	3406.08	-0.568225	0.124305	-4.57121	4.85e-06	5.9e-05	3817.99	4092.33	3844.34	3411.52	4232.5	2680.57	2577.85	2591.57
1233	Dcun1d1	189.743	-1.9022	0.416415	-4.56804	4.92e-06	5.98e-05	462.913	277.649	122.049	238.913	210.705	55.604	108.676	41.4315
1234	Prpf39	589.457	-0.890653	0.194992	-4.56763	4.93e-06	5.98e-05	654.539	651.772	718.385	773.48	779.467	474.612	377.975	285.424
1235	Rpl19	4876.34	0.762948	0.167028	4.56779	4.93e-06	5.98e-05	3542.19	4170.41	3621.43	4732.81	3252.98	6360.31	5582.93	7747.62
1236	Sardh	390.973	1.20608	0.264062	4.56742	4.94e-06	5.98e-05	340.85	313.557	155.498	262.864	234.349	659.144	484.029	677.491
1237	Prkd3	1452.05	-0.690021	0.151237	-4.56253	5.05e-06	6.12e-05	1694.96	1632.48	1569.86	1568.63	1988.2	938.616	1050.03	1173.61
1238	Ptpn7	76.1641	1.90355	0.417268	4.56195	5.07e-06	6.13e-05	31.0232	43.4419	59.8985	32.7824	19.2372	121.982	132.53	168.417
1239	Atp6v1c1	2447.55	-0.731464	0.160485	-4.55782	5.17e-06	6.25e-05	3028.29	2996.81	2431.35	2900.45	3005.95	1694.93	1418.38	2104.22
1240	0610010F05Rik	284.119	1.12345	0.246689	4.55411	5.26e-06	6.35e-05	271.162	184.484	165.173	164.089	207.096	514.033	418.217	348.7
1241	Tbpl1	1199.53	-0.67428	0.148103	-4.55279	5.29e-06	6.39e-05	1375.49	1466.55	1408.79	1303.88	1422.52	1010.96	764.528	843.5
1242	Papss1	749.512	-0.975234	0.214221	-4.55246	5.3e-06	6.39e-05	918.36	906.502	676.566	1020.39	1067.76	552.594	348.263	505.662
1243	Sqrdl	2689.29	-0.607896	0.133539	-4.55219	5.31e-06	6.39e-05	3178.71	3497.24	2901.05	2780.52	3074.16	2115.81	1866.47	2100.38
1244	Xpo1	1042.44	0.603275	0.132524	4.5522	5.31e-06	6.39e-05	904.159	849.403	830.901	888.905	882.116	1315.6	1240.67	1427.8
1245	Ggh	1148.26	0.838137	0.18431	4.54743	5.43e-06	6.53e-05	800.46	970.077	781.073	1000.55	865.448	1390.93	1335.69	2041.85
1246	Kng2	29.6649	-3.99957	0.88003	-4.54481	5.5e-06	6.61e-05	22.4629	54.0118	60.5941	58.3413	35.225	0	6.68396	0
1247	Rps6	5779.26	0.664434	0.1462	4.5447	5.5e-06	6.61e-05	4154.75	4860.37	4702.75	5795.1	4180.89	7629.48	6996.19	7914.58
1248	Oxr1	1050.98	-0.913554	0.201057	-4.54376	5.53e-06	6.63e-05	1689.5	1241.34	1258.94	1064.23	1132.65	751.692	753.961	515.535
1249	Gm11653	151.8	-1.57333	0.346314	-4.54309	5.54e-06	6.65e-05	148.246	219.017	151.966	259.322	225.228	40.7275	75.3371	94.5563
1250	Fndc3a	2153.97	0.568798	0.125227	4.54213	5.57e-06	6.67e-05	1871.02	1896.51	1812.2	1598.59	1939.48	2693.47	2744.19	2676.32
1251	Golt1b	2206.08	-0.726333	0.159918	-4.5419	5.57e-06	6.67e-05	2539.2	2763.14	2617.96	2202.16	2811.36	1594.73	1273.6	1846.45
1252	Rps11	4629.49	0.802049	0.176624	4.54099	5.6e-06	6.7e-05	3157.77	4032.49	3217.53	4617.82	3066.39	6061.91	5513.6	7368.4
1253	Sox4	393.494	-0.95512	0.210352	-4.54059	5.61e-06	6.71e-05	443.767	505.804	402.125	528.474	509.494	229.462	209.414	319.408
1254	Cxx1c	168.484	1.08378	0.23878	4.5388	5.66e-06	6.76e-05	126.03	112.175	139.778	107.932	107.411	227.191	270.06	257.293
1255	Soat1	3809.8	0.824575	0.181713	4.53779	5.68e-06	6.78e-05	2556.49	3683.39	2672.66	3128.87	2715.51	4920.75	4228.58	6572.17
1256	Pcyt1a	933.75	0.834326	0.18387	4.53759	5.69e-06	6.79e-05	917.515	685.567	590.998	621.749	791.452	1248.65	1201.11	1412.96
1257	Acp5	11.0837	5.38942	1.18788	4.53701	5.71e-06	6.8e-05	2.63144	0.539361	0.848387	0	0	22.1137	42.9649	19.5715
1258	Plxnc1	181.077	2.3863	0.52665	4.53108	5.87e-06	6.99e-05	8.19599	51.943	136.841	93.9282	62.0338	391.86	367.916	335.901
1259	Ebf3	130.948	-1.64605	0.36353	-4.52797	5.96e-06	7.08e-05	134.347	215.103	123.618	242.938	160.513	37.1921	68.8546	65.0188
1260	Trps1	453.854	2.74611	0.606462	4.52808	5.95e-06	7.08e-05	35.6783	85.5171	151.416	307.396	143.913	930.644	1028.9	947.365
1261	Tns4	291.581	1.07177	0.236774	4.52655	6e-06	7.12e-05	209.647	216.656	177.524	184.844	231.226	447.568	314.315	550.869
1262	Lamb2	714.989	0.963779	0.212965	4.52552	6.02e-06	7.15e-05	612.108	610.203	552.653	357.199	508.493	1107.57	1147.28	824.404
1263	Rb1	530.276	1.33372	0.294768	4.52466	6.05e-06	7.17e-05	215.326	274.587	444.378	352.641	398.08	1066.43	480.892	1009.87
1264	Gnpda2	767.019	-0.646765	0.142964	-4.52396	6.07e-06	7.19e-05	876.049	947.07	863.477	847.384	894.896	559.535	540.352	607.392
1265	Bcl6	549.077	1.07548	0.237775	4.52309	6.09e-06	7.22e-05	266.302	447.858	335.738	385.706	499.421	953.742	629.121	874.728
1266	Ctps	303.381	-1.39756	0.309129	-4.52095	6.16e-06	7.28e-05	498.167	319.113	523.863	313.782	310.302	132.274	100.175	229.376
1267	Cenpf	350.922	1.37962	0.305272	4.51932	6.2e-06	7.33e-05	133.075	271.463	351.178	179.656	163.032	646.826	576.972	485.176
1268	I830077J02Rik	2402.47	-0.871742	0.192935	-4.51831	6.23e-06	7.36e-05	3757.2	2902.09	2591.07	2238.73	2994.78	1944.3	1422.68	1368.93
1269	Ivd	992.288	0.883184	0.195477	4.51809	6.24e-06	7.36e-05	644.268	910.382	565.207	895.359	748.221	1437.45	1220.77	1516.66
1270	Mdfi	101.571	-1.73709	0.384529	-4.51745	6.26e-06	7.38e-05	100.418	151.152	127.134	158.811	155.2	38.3662	63.1939	18.2967
1271	Hcfc1r1	527.937	0.793398	0.175743	4.51453	6.35e-06	7.48e-05	446.026	393.348	371.521	475.092	387.314	803.682	645.612	700.899
1272	Rpl23a	2486.48	0.877107	0.194311	4.51393	6.36e-06	7.49e-05	1528.54	1756.94	1765.88	2735.34	1673.67	3439.96	3198.13	3793.4
1273	Gm6644	61.7101	-2.32619	0.515492	-4.51257	6.4e-06	7.54e-05	86.4363	63.1307	108.179	70.5978	119.604	23.8146	21.9184	0
1274	Mrpl23-ps1	719.035	0.809046	0.179341	4.51122	6.45e-06	7.58e-05	538.091	599.114	488.053	687.455	491.982	1085.91	876.337	985.334
1275	Actn1	71.3401	-2.11772	0.469509	-4.51051	6.47e-06	7.6e-05	105.504	55.8819	127.381	119.996	98.2827	32.3992	23.9623	7.31385
1276	1700123O20Rik	569.58	-0.773587	0.171575	-4.50874	6.52e-06	7.66e-05	635.406	661.499	644.844	685.357	730.731	348.891	372.854	477.06
1277	Mif	1077.22	0.779126	0.172951	4.50489	6.64e-06	7.79e-05	851.064	903.804	771.826	815.665	890.678	1395.87	1164.66	1824.19
1278	Rab39	1235.11	-0.676808	0.15037	-4.50094	6.77e-06	7.92e-05	1480.55	1410.22	1282.43	1685.02	1323.4	926.897	841.213	931.125
1279	Tnfaip8	2800.3	0.634454	0.140957	4.50106	6.76e-06	7.92e-05	2547.99	2332.33	1981.01	2439.51	2288.43	3507.16	3248.46	4057.5
1280	Nod2	111.244	1.62376	0.360932	4.49879	6.83e-06	8e-05	42.2331	43.6846	88.0838	62.1643	76.595	255.478	156.731	164.978
1281	Sorl1	655.145	1.37138	0.304939	4.49723	6.88e-06	8.05e-05	450.875	343.987	198.497	446.769	617.696	1419.11	882.066	882.161
1282	Clip1	1940.75	-0.669859	0.149001	-4.49568	6.93e-06	8.1e-05	2119.95	2556.71	2115.08	2068.19	2399.4	1429.85	1231.4	1605.41
1283	Chst12	1537.4	0.839839	0.187014	4.49078	7.1e-06	8.28e-05	1660.8	1099.12	1067.1	1023.87	1084.74	2328.99	1968.91	2065.66
1284	Osbpl9	3580	0.585536	0.130423	4.4895	7.14e-06	8.33e-05	2979.15	3224.32	2849.81	2785.35	3240.76	4438.03	5038.56	4083.99
1285	Fam174a	1449.98	0.941429	0.209786	4.48757	7.2e-06	8.4e-05	1025.59	724.734	1078.79	1498.93	1066.57	2272.6	2046.46	1886.15
1286	H2-T22	604.034	0.75045	0.167269	4.48648	7.24e-06	8.43e-05	516.147	538.922	474.939	443.736	431.646	892.586	732.124	802.174
1287	Tgif2	628.635	-0.936813	0.208837	-4.48585	7.26e-06	8.45e-05	937.189	789.941	797.847	613.93	681.292	428.524	309.744	470.61
1288	4632428N05Rik	59123.4	-0.662844	0.147785	-4.48518	7.29e-06	8.47e-05	82939.8	73511.5	64370.9	55903.4	66269.1	45275.1	39999.1	44718.5
1289	Mcm6	850.531	1.1505	0.256548	4.48454	7.31e-06	8.49e-05	915.42	648.643	378.874	482.761	494.051	1416.9	1105.05	1362.56
1290	Rpl28-ps1	692.882	0.997336	0.222617	4.48005	7.46e-06	8.66e-05	482.032	529.629	487.194	606.858	409.454	1055.87	684.676	1287.34
1291	Gls	1003.13	0.932419	0.208262	4.47715	7.56e-06	8.78e-05	913.677	523.346	817.792	830.388	650.754	1349.68	1241.68	1697.69
1292	Jag2	104.607	-1.90986	0.426697	-4.47592	7.61e-06	8.82e-05	193.249	149.236	134.295	103.475	136.059	49.3064	15.2999	55.9375
1293	Sptlc2	3249.32	0.632089	0.141443	4.46885	7.86e-06	9.11e-05	2768.53	3206.97	2374.68	2475.56	2648.67	4447.7	4143.22	3929.22
1294	Bmpr2	1183.85	-0.663836	0.148566	-4.46831	7.88e-06	9.13e-05	1397.27	1247.9	1308.27	1576.23	1333.24	892.776	780.837	934.32
1295	Ifnar2	5537.73	0.608737	0.136266	4.46727	7.92e-06	9.16e-05	4782.43	4133.92	4094.17	5286.34	4832.03	7006.22	6565.87	7600.84
1296	Itgb5	1588.7	-0.689958	0.15464	-4.4617	8.13e-06	9.4e-05	1726.88	1935.02	1807.44	2028.77	1784.47	1347.57	1145.39	934.031
1297	Pmaip1	199.94	1.47458	0.330695	4.45905	8.23e-06	9.51e-05	123.796	105.361	120.487	166.827	78.2485	252.293	242.328	510.181
1298	Dpp7	1476.79	0.887275	0.199161	4.45507	8.39e-06	9.68e-05	1336.78	1147.31	1052.63	817.407	1242.84	2375.74	1579.53	2262.07
1299	Mmp12	470.565	1.29391	0.290601	4.45253	8.49e-06	9.79e-05	174.253	253.014	489.565	264.561	336.808	633.305	753.771	859.244
1300	Gtpbp1	1128.51	-0.816163	0.183324	-4.45202	8.51e-06	9.8e-05	1530.33	1366.49	1118.9	1432.86	1295.03	960.186	664.65	659.594
1301	Ccr5	9963.64	-0.967926	0.217443	-4.45141	8.53e-06	9.82e-05	14577.9	14995.4	11861.8	8287.48	11262.3	6727.52	4376.14	7620.49
1302	Tyrobp	9702.52	0.884935	0.198861	4.45003	8.59e-06	9.88e-05	8682.4	7780.85	5713.9	7015.9	7617.25	12987.8	9771.16	18050.9
1303	Gm16300	28.8339	-3.55809	0.799784	-4.44881	8.63e-06	9.93e-05	23.8765	46.8017	51.857	69.7067	25.0143	0.836891	4.88853	7.68959
1304	Hyi	452.216	0.960214	0.21615	4.44235	8.9e-06	0.000102206	309.156	355.061	256.883	349.363	388.174	578.164	552.047	828.878
1305	Ube2j1	2339.71	-0.855697	0.192635	-4.44206	8.91e-06	0.000102265	3639.25	2739.97	2992.78	2243.89	2425.51	1300.24	1463.8	1912.23
1306	Cd300a	6752.14	0.671472	0.151183	4.44145	8.94e-06	0.00010248	6317.03	5819.69	5017.78	4684.99	5769.33	8260.14	7877.44	10270.7
1307	Pnp2	54.9739	-2.30294	0.518738	-4.43951	9.02e-06	0.000103326	114.134	80.5203	75.2082	32.2772	88.6163	15.0884	14.6481	19.2992
1308	Irak3	198.608	1.51751	0.342034	4.43672	9.13e-06	0.000104593	94.2881	145.503	95.5664	60.16	188.26	363.109	340.763	301.213
1309	Vnn3	34.8972	2.88707	0.650865	4.43575	9.18e-06	0.000104987	1.3292	19.0251	9.16582	11.0408	8.67998	47.1806	61.6141	121.142
1310	Csrp1	73.5282	2.63225	0.593504	4.43511	9.2e-06	0.000105219	59.814	17.9386	7.49927	25.0895	14.8788	126.396	78.6171	257.992
1311	Bloc1s1	567.173	0.867206	0.195548	4.43474	9.22e-06	0.000105318	383.613	522.714	411.567	378.295	463.152	847.6	635.562	894.884
1312	Zfp467	1274.8	-0.761948	0.171854	-4.43369	9.26e-06	0.000105754	1551.04	1326.71	1520.9	1861.06	1285.01	877.424	989.661	786.618
1313	Mvb12a	483.705	0.917463	0.207301	4.42576	9.61e-06	0.00010963	459.544	344.776	398.432	279.205	328.61	623.603	649.385	786.086
1314	Akirin2	411.053	-0.916119	0.207018	-4.42531	9.63e-06	0.000109776	402.88	464.297	527.402	629.074	476.302	277.75	273.631	237.088
1315	Arpc5	4069.89	0.719206	0.16253	4.42507	9.64e-06	0.000109811	3655.29	3523.23	2824.19	3145.05	3218.37	5288.66	4334.47	6569.9
1316	Hist1h3d	22.8585	-3.50835	0.793179	-4.42315	9.73e-06	0.000110625	27.8509	36.4653	32.6304	42.4541	33.7946	5.01842	0.815108	3.83939
1317	Nr1d2	967.907	-0.833171	0.18836	-4.42328	9.72e-06	0.000110625	1058.42	1300.13	1130.34	1132.57	1186.72	750.669	735.9	448.504
1318	Bmp2k	7028.06	-0.751033	0.170258	-4.41115	1.03e-05	0.000116848	6881.51	8301	8656.26	8762.47	8825.15	5005.11	3721.69	6071.25
1319	Lgmn	111778	-0.677969	0.153712	-4.41065	1.03e-05	0.000117031	148119	142551	119449	109134	131064	83525.2	67464.5	92917.4
1320	Tecpr1	1515.77	0.796809	0.180664	4.41044	1.03e-05	0.000117058	1203.5	1044.7	917.484	1532.18	1239.26	1889.55	2113.04	2186.43
1321	Eid1	198.082	1.33859	0.303557	4.4097	1.04e-05	0.000117369	82.383	95.6875	130.902	191.91	127.277	346.737	262.884	346.873
1322	Hprt	2268.7	0.731546	0.166032	4.40606	1.05e-05	0.000119265	1609.11	1750.65	1583.15	2366.57	1776.84	2800.76	2950.64	3311.87
1323	1700001C19Rik	67.6931	-1.81957	0.413124	-4.40442	1.06e-05	0.000120084	111.978	98.2795	78.7286	79.1269	99.1038	37.3728	22.2407	14.7147
1324	Mt3	17.7603	3.57192	0.811034	4.40416	1.06e-05	0.000120137	6.57664	2.19663	2.55699	6.21954	0.647486	30.8786	35.8469	57.1595
1325	Fam219a	281.734	1.11752	0.25376	4.40384	1.06e-05	0.000120219	219.614	175.716	206.034	144.914	235.718	551.757	350.77	369.347
1326	Fam3c	1208.68	0.721993	0.164106	4.39954	1.08e-05	0.000122533	865.158	939.18	994.003	1069.05	977.467	1396.38	1449.7	1978.46
1327	Sgsm3	723.117	-0.992101	0.225517	-4.39923	1.09e-05	0.000122616	1154.22	1063.95	692.531	793.113	748.504	545.024	421.421	366.17
1328	Selenbp1	491.974	1.08237	0.246284	4.39481	1.11e-05	0.000125044	500.441	372.953	321.846	249.874	294.852	884.86	720.144	590.826
1329	Itfg3	438.926	1.17259	0.267243	4.38774	1.15e-05	0.000129084	323.91	299.689	248.295	339.835	272.434	417.994	596.588	1012.66
1330	Cbr2	198.279	2.05241	0.468156	4.38403	1.17e-05	0.000131191	109.658	113.411	13.4175	106.297	112.943	432.118	409.063	289.321
1331	Fblim1	544.458	0.778312	0.177539	4.38389	1.17e-05	0.000131191	388.062	448.097	430.1	404.002	464.011	729.447	618.006	873.939
1332	Gm15928	453.996	-0.986118	0.225026	-4.38224	1.17e-05	0.000132088	454.159	519.128	524.853	531.079	761.266	334.458	251.263	255.758
1333	Cox6a1	1827.26	0.670191	0.152983	4.38082	1.18e-05	0.000132851	1465.53	1703.91	1255.3	1594.12	1452.91	2488.46	2070.69	2587.21
1334	Chst11	174.831	-1.51972	0.34698	-4.37986	1.19e-05	0.000133337	259.912	233.879	180.682	349.112	129.873	80.7882	68.4294	95.9753
1335	Creb3l2	1579.43	-0.669832	0.152961	-4.37911	1.19e-05	0.000133699	2010.45	1740.62	1944.57	1519.7	1970.55	1248.56	1174.1	1026.92
1336	Gm11633	20.9354	-3.95266	0.902857	-4.37794	1.2e-05	0.000134314	43.7814	32.9176	36.9718	33.6339	15.3081	1.59121	3.27915	0
1337	Stx16	1127.78	0.787906	0.180036	4.37637	1.21e-05	0.000135183	1001.75	954.273	743.664	825.351	910.639	1885.37	1270.14	1431.05
1338	Pim2	307.045	-1.383	0.316388	-4.37122	1.24e-05	0.000138311	608.966	409.923	300.748	346.972	327.469	198.774	91.133	172.378
1339	Gbp7	1674.9	0.833635	0.190884	4.36724	1.26e-05	0.000140751	1437.51	1489.84	1336.21	972.341	1249.55	2742.92	2405.46	1765.42
1340	Pfdn5	1721.32	0.707122	0.162086	4.36265	1.28e-05	0.000143631	1371.86	1379.41	1294.42	1641.18	1263.15	2384.22	1844.33	2591.95
1341	Hivep3	1890.78	-0.669243	0.153626	-4.35631	1.32e-05	0.00014774	1943.31	2043.5	2453.25	2588.58	1959.58	1445.43	1376.61	1315.98
1342	Wbp5	375.091	0.884721	0.203485	4.34784	1.37e-05	0.000153445	264.753	283.835	293.802	292.786	279.995	537.118	401.153	647.283
1343	Sspn	86.9712	-1.83934	0.423801	-4.3401	1.42e-05	0.000158831	115.981	161.273	127.894	126.155	64.9274	45.0459	22.5698	31.9241
1344	Arid1a	3082.59	-0.561612	0.129447	-4.33854	1.43e-05	0.000159845	3195.42	3532.67	3310.04	3802.69	3705.24	2397.14	2564.49	2152.99
1345	Emr4	224.703	3.96206	0.913621	4.33665	1.45e-05	0.000161105	1.33191	57.0042	19.9201	19.9408	74.3627	599.743	544.43	480.889
1346	Acads	1402.38	-0.895608	0.206768	-4.33146	1.48e-05	0.000164826	2161.18	1958.1	1293.52	1632.76	1426.81	898.047	743.086	1105.52
1347	Adam8	97.0846	1.72811	0.399286	4.32799	1.5e-05	0.00016732	46.7275	45.6372	54.9699	37.8305	73.0915	225.058	89.27	204.093
1348	Rpl14	2550.05	0.709461	0.164122	4.32276	1.54e-05	0.000171214	1821.31	2038.16	1841.22	2578.98	2011.28	3541.63	2842.34	3725.52
1349	BC049352	130.158	1.46672	0.339538	4.31974	1.56e-05	0.000173317	84.2065	52.6416	50.6961	119.915	85.3595	219.934	211.813	216.695
1350	Nagk	821.192	0.663167	0.153517	4.31982	1.56e-05	0.000173317	642.203	676.368	625.501	787.103	635.635	1115.02	983.736	1103.97
1351	Hsf2bp	51.5849	-3.46401	0.802575	-4.31612	1.59e-05	0.000176053	96.7148	94.0933	94.6027	25.0089	74.3179	0	21.6994	6.24183
1352	Tmem52	237.52	-1.44857	0.335782	-4.314	1.6e-05	0.000177617	395.079	186.109	284.562	383.098	319.12	135.267	143.305	53.6202
1353	Mmgt1	636.056	-0.663309	0.153839	-4.31169	1.62e-05	0.000179347	815.418	734.374	700.042	740.929	703.209	495.997	448.043	450.436
1354	Gclc	186.911	-1.48922	0.345588	-4.30924	1.64e-05	0.000181218	310.323	171.017	223.289	311.118	220.054	132.315	55.6586	71.5128
1355	Col14a1	151.151	2.08427	0.483901	4.30722	1.65e-05	0.000182609	50.792	22.9511	140.59	69.1029	58.0234	403.603	147.52	316.624
1356	Csf2ra	1104.07	1.11093	0.257916	4.30733	1.65e-05	0.000182609	1109.98	793.575	432.384	797.706	717.052	2092.6	1340.61	1548.67
1357	Dnajb4	412.599	-0.827266	0.192239	-4.30332	1.68e-05	0.000185719	459.024	519.261	508.149	546.696	429.986	306.225	235.946	295.503
1358	Gm16353	15.1943	3.50174	0.813804	4.30293	1.69e-05	0.00018577	3.97804	1.08861	3.34769	6.06802	1.87877	45.9776	28.5401	30.6757
1359	Shfm1	1065.61	0.75946	0.176492	4.30309	1.68e-05	0.00018577	724.944	793.577	927.637	925.642	853.969	1668.88	1123.42	1506.83
1360	5031439G07Rik	1228.18	0.906025	0.21061	4.30191	1.69e-05	0.000186488	984.241	1102.11	713.333	810.788	1023.56	2225.64	1685.78	1279.96
1361	Kif3c	519.402	-1.05773	0.246139	-4.2973	1.73e-05	0.000190273	691.921	671.692	696.726	556.57	618.733	457.868	233.329	228.379
1362	1700037H04Rik	210.818	1.1246	0.261867	4.29457	1.75e-05	0.000192483	172.794	187.357	116.982	107.93	143.427	288.791	315.115	354.152
1363	Creb5	52.9583	3.23812	0.754067	4.29421	1.75e-05	0.000192658	23.9827	14.1444	20.8218	0	5.56432	220.926	67.2185	71.0085
1364	Rpl11	3086.24	0.896129	0.208738	4.29307	1.76e-05	0.000193502	1677.51	2306.72	2441.21	3220.22	2012.98	4589.45	3439.85	5002
1365	Hhex	2173.7	-0.761515	0.17749	-4.29047	1.78e-05	0.000195641	2933.74	1839.12	2513.17	2617.72	2947.21	1674.17	1472.3	1392.13
1366	Nrm	1541.48	-0.663482	0.154879	-4.28387	1.84e-05	0.000201392	1760.6	1972.63	1679.49	1859.94	1658.84	1198.83	923.922	1277.59
1367	Lbr	2123.86	0.717866	0.167604	4.28312	1.84e-05	0.000201929	1703.4	2066.32	1884.79	1387.61	1515.6	3137.5	2778.96	2516.72
1368	Rpl7	6756.71	0.76914	0.179728	4.27948	1.87e-05	0.000205109	4775.64	5731.5	4810.12	6703.02	4693.19	9024.23	7179.41	11136.6
1369	Dram2	3498.5	0.504591	0.117928	4.27882	1.88e-05	0.000205567	3147.2	3132.73	2709.83	3119.29	3006.57	4382.43	4083.24	4406.74
1370	Ythdf2	4246.77	-0.534292	0.124982	-4.27495	1.91e-05	0.000209019	5411.47	4804.62	4316.92	4707.9	4776.23	3398.74	3112.62	3445.62
1371	mt-Co2	14677.4	0.565817	0.132399	4.27357	1.92e-05	0.000210156	10880.7	11857.7	11725.1	13759.3	13957	18405.8	17165.9	19667.4
1372	Myadm	4764.86	0.523488	0.122531	4.27229	1.93e-05	0.000211213	4328.42	4245.43	4220.76	3601.54	4061.61	5794.49	5539.09	6327.5
1373	Clta	6921.43	0.537613	0.125926	4.26929	1.96e-05	0.000213924	5635.42	6205.75	5237.27	6433.59	6074.74	8713.7	7866.86	9204.09
1374	Cops4	2527.13	-0.618333	0.144842	-4.26902	1.96e-05	0.000214027	2995.72	2928.65	2498.91	2834.19	3263.78	1898.68	1669.12	2127.98
1375	Retsat	898.199	0.740327	0.173576	4.26515	2e-05	0.000217611	684.508	825.098	768.247	605.085	700.83	1340.09	993.697	1268.03
1376	Wdr36	995.062	0.963716	0.22599	4.26442	2e-05	0.000218168	804.8	865.175	686.965	749.486	572.769	1849.77	1514.02	917.509
1377	Cox4i1	4830.07	0.640077	0.150164	4.26252	2.02e-05	0.000219865	3629.2	4236.83	3624.35	4791.8	3676.82	6063.02	5565.31	7053.25
1378	Sf3b5	819.061	0.849588	0.199383	4.26108	2.03e-05	0.000221129	664.747	677.998	539.31	561.987	694.517	1196.84	823.918	1393.17
1379	Unc119	12.5977	4.88417	1.14636	4.26059	2.04e-05	0.000221452	0	0	0	3.30782	2.25866	24.9439	34.4176	35.8534
1380	Capza2	14771.2	-0.505495	0.118671	-4.25962	2.05e-05	0.000221934	17868.4	17026.8	15399.6	16745.5	16015.7	12408.3	10500.9	12204.2
1381	Fgfr1op	697.272	-0.815962	0.191555	-4.25967	2.05e-05	0.000221934	1022.22	774.857	807.526	861.961	687.576	505.947	390.655	527.436
1382	Mtfr1l	2266.22	-0.762465	0.178985	-4.25994	2.04e-05	0.000221934	3523.63	2689.14	2245.44	2497.64	2425.47	1447.91	1445.75	1854.75
1383	Hs3st3b1	194.028	-1.25208	0.294241	-4.25528	2.09e-05	0.000226123	230.554	228.475	259.498	191.065	338.387	130.043	106.309	67.8936
1384	Phf14	651.209	-0.74516	0.175135	-4.25478	2.09e-05	0.000226457	793.799	724.024	664.812	908.216	755.057	482.512	486.134	395.118
1385	Batf	182.224	1.20778	0.284558	4.24441	2.19e-05	0.000236871	107.159	170.046	96.6557	100.846	135.345	341.805	238.608	267.331
1386	Gm11711	79.486	6.89712	1.625	4.24439	2.19e-05	0.000236871	6.68094	0	0	0	2.57217	191.346	50.7328	384.556
1387	Tpt1-ps3	760.135	1.20311	0.283821	4.23898	2.25e-05	0.000242477	453.866	363.941	419.865	914.126	400.603	1004.6	1126.57	1397.5
1388	Armc1	747.954	-0.644392	0.152124	-4.23597	2.28e-05	0.000245572	925.773	788.778	831.503	891.057	876.603	525.272	524.131	620.516
1389	Neurl3	3364.17	0.756977	0.178718	4.23559	2.28e-05	0.000245811	3400.75	2680.69	2218.54	2462.81	2591.13	4301.94	3745.16	5512.34
1390	Acaa2	544.813	0.693148	0.163673	4.23497	2.29e-05	0.000246315	467.445	470.986	410.666	454.006	405.818	747.564	637.849	764.168
1391	Fut4	373.073	1.17581	0.277656	4.23478	2.29e-05	0.000246343	390.363	280.083	178.351	166.346	254.724	619.86	564.983	529.87
1392	Cnksr3	144.41	1.29847	0.306755	4.23294	2.31e-05	0.00024819	117.644	68.6095	70.1979	108.317	106.461	276.462	231.014	176.577
1393	Slc9a7	432.458	-0.796682	0.188289	-4.23117	2.32e-05	0.000249968	535.231	509.454	521.04	535.76	456.016	257.126	278.187	366.851
1394	Add3	106.228	-2.69623	0.6373	-4.23071	2.33e-05	0.000250303	60.7946	192.653	211.999	271.347	47.0277	28.4203	37.5829	0
1395	Tmem82	106.982	1.46563	0.346591	4.22872	2.35e-05	0.000252347	43.6089	88.1312	52.0807	83.7756	52.6407	196.811	145.056	193.75
1396	BC064078	91.5803	1.83718	0.434509	4.22819	2.36e-05	0.000252759	18.4496	48.2152	39.0876	58.271	66.1885	100.01	181.613	220.808
1397	Mmp9	222.101	3.07178	0.726829	4.22628	2.38e-05	0.000254733	111.457	24.916	9.81967	63.7071	83.331	557.378	316.83	609.372
1398	Pnma2	48.7669	2.0144	0.476848	4.22442	2.4e-05	0.000256663	28.6656	31.9454	17.2719	13.6687	22.168	68.0942	130.137	78.1852
1399	Spire1	517.738	-0.945278	0.223879	-4.22226	2.42e-05	0.000258943	472.133	608.465	699.116	785.458	599.938	408.995	294.645	273.153
1400	Pde8a	65.0939	1.71352	0.405891	4.22163	2.43e-05	0.00025948	40.4234	22.1434	27.2764	44.5177	41.7297	144.957	88.4848	111.218
1401	Tvp23a	131.295	-1.47389	0.349156	-4.22129	2.43e-05	0.000259687	221.957	159.262	126.987	119.225	233.873	47.521	68.5251	73.0131
1402	H2-Ob	1173.05	-0.72535	0.171878	-4.22015	2.44e-05	0.000260819	1501.03	1715.03	1258.92	1217.7	1189.51	848.303	786.415	867.503
1403	Mink1	406.78	1.10733	0.262495	4.21846	2.46e-05	0.000262593	355.274	257.086	195.325	382.292	235.713	743.874	616.812	467.868
1404	Cdc14b	187.042	1.19323	0.28292	4.21757	2.47e-05	0.000263449	125.709	92.1293	117.203	172.247	122.377	218.603	327.683	320.381
1405	5430427O19Rik	984.028	-0.599028	0.142115	-4.21509	2.5e-05	0.000265416	1080.33	1205.66	1188.24	1031.45	1128.88	690.843	778.856	767.958
1406	Dhrs13	39.0029	2.27908	0.540689	4.21514	2.5e-05	0.000265416	9.33763	17.2306	11.4592	21.262	19.7286	37.2561	99.7214	96.0275
1407	H3f3b	12022.9	0.700094	0.166083	4.21533	2.49e-05	0.000265416	11503.7	9890.45	8724.64	9187.01	9386.22	15719.2	12319.6	19452.3
1408	Mpzl1	37.742	2.42299	0.574784	4.21547	2.49e-05	0.000265416	6.53936	8.79377	15.7081	26.5437	13.9514	57.0282	107.4	65.9714
1409	Sesn2	455.781	-0.745097	0.176746	-4.21563	2.49e-05	0.000265416	595.36	526.613	494.693	534.43	544.529	353.727	326.666	270.23
1410	Rps17	2253.15	0.84202	0.199839	4.21348	2.51e-05	0.000267122	1353.86	1665.08	1756.81	2404.98	1496.52	2808.51	2785.62	3753.8
1411	Ndufaf7	883.463	-0.701611	0.166582	-4.2118	2.53e-05	0.000268923	1071.16	1136.72	942.701	843.556	1170.75	653.435	636.665	612.718
1412	Klk9	36.1729	-2.33345	0.554081	-4.21138	2.54e-05	0.00026924	47.7993	54.9352	39.2418	52.3731	67.2664	10.0743	13.8186	3.87412
1413	2310003H01Rik	828.198	0.751433	0.178458	4.21071	2.55e-05	0.000269801	745.821	618.84	580.387	682.946	672.997	1369.14	956.75	998.698
1414	Dnase2a	2857.95	0.500614	0.118894	4.21059	2.55e-05	0.000269801	2515.26	2513.34	2408.1	2547.92	2379.49	3753.02	3185.46	3561.03
1415	Srgn	2461.41	0.700234	0.166357	4.20921	2.56e-05	0.000271257	1680.12	2018.83	1850.31	2044.91	2361.08	2954.6	2841.49	3939.9
1416	Nars	1388.85	-0.710221	0.168846	-4.20632	2.6e-05	0.000274557	1932.73	1619.55	1470.89	1473.67	1650.29	1126.7	1050.2	786.756
1417	Cd3eap	479.301	-0.845741	0.201291	-4.20159	2.65e-05	0.000280165	727.957	607.409	458.221	552.745	533.62	337.532	324.473	292.45
1418	Pld4	21979.7	-0.761102	0.181298	-4.19806	2.69e-05	0.000284355	31982.3	29031	22912.7	20949.1	24982.8	17783.1	11810.4	16386.5
1419	Gm28049	402.392	-0.997697	0.237704	-4.19723	2.7e-05	0.000285207	613.514	384.727	488.439	547.321	425.821	227.513	202.755	329.042
1420	Kpna2	969.038	-0.91894	0.219053	-4.19505	2.73e-05	0.000287755	1147.57	1299.54	1253.52	1089.78	1069.89	543.305	440.586	908.119
1421	Rpl39	1756.39	1.00307	0.239162	4.19412	2.74e-05	0.000288743	937.237	1193.28	1245.99	2053.82	947.564	2580.29	2302.93	2789.99
1422	Srm	969.053	-0.772243	0.18423	-4.19174	2.77e-05	0.000291575	1301.64	1061.78	1102.77	1243.86	1010.87	667.041	527.961	836.5
1423	Ugt1a6b	23.6632	-4.37977	1.04509	-4.19079	2.78e-05	0.000292593	23.9721	76.1731	24.1605	45.107	15.6623	4.2309	0	0
1424	Arpc2	8565.22	0.473363	0.11302	4.18833	2.81e-05	0.000295577	7377.14	7127.36	7096.61	8121.99	7650.53	9979.76	10110.3	11058.1
1425	Pcdhgb4	486.858	-0.953628	0.227725	-4.18762	2.82e-05	0.000296294	695.425	650.407	464.733	597.604	574.206	406.476	258.367	247.648
1426	Lhpp	165.878	1.13813	0.271831	4.18691	2.83e-05	0.000296855	118.572	113.617	92.6085	136.453	107.781	282.624	184.267	291.104
1427	Sh3bgrl3	6592.29	0.643923	0.153796	4.18687	2.83e-05	0.000296855	5189.14	5959.12	4544.18	6287.53	5229.55	8610.69	7255.85	9662.27
1428	Prrc1	1048.19	-0.636561	0.152124	-4.18449	2.86e-05	0.000299782	1291.41	1190.11	1180.52	1056.71	1322.09	794.798	694.976	854.899
1429	Kcnma1	52.0249	-2.37824	0.568529	-4.18314	2.88e-05	0.000301351	117	32.0561	42.1144	109.546	74.4501	14.0191	17.7288	9.28451
1430	Rfc5	442.34	0.88942	0.212882	4.178	2.94e-05	0.000308034	352.094	258.496	331.528	424.447	312.136	721.27	538.944	599.803
1431	Tal1	404.412	-1.10873	0.265408	-4.17746	2.95e-05	0.000308537	344.683	586.034	493.23	474.02	635.601	179.332	321.12	201.272
1432	Ddx60	561.201	1.05173	0.251818	4.17653	2.96e-05	0.000309593	546.317	342.201	324.639	353.91	438.764	1146.18	625.891	711.707
1433	Cep128	370.585	0.945944	0.226556	4.17531	2.98e-05	0.000311031	255.85	227.07	289.406	311.943	297.429	461.164	694.144	427.674
1434	Il1r2	43.6886	2.70386	0.648851	4.16715	3.08e-05	0.000322148	11.8063	16.8004	12.6936	2.0573	27.5257	69.3277	66.7495	142.548
1435	Nudt9	956.898	0.63976	0.153581	4.16562	3.11e-05	0.000324095	749.982	727.864	823.636	941.895	715.144	1255.61	1225.05	1216
1436	Wdr90	98.8855	1.60932	0.38643	4.16459	3.12e-05	0.00032533	64.4099	38.9999	42.9931	49.5502	78.146	114.396	154.866	247.724
1437	Cdc42ep3	286.706	-1.08297	0.26014	-4.16303	3.14e-05	0.000327111	272.728	341.727	365.184	333.274	478.057	215.476	141.561	145.643
1438	Coro1c	2674.44	-0.953493	0.229031	-4.16317	3.14e-05	0.000327111	4281.74	4025.25	2590.06	1971.68	3467.77	1862.79	1565.86	1630.33
1439	Cd33	10419.7	-0.531954	0.127815	-4.16192	3.16e-05	0.000328474	12783.3	12808.6	10890.3	10480	11950.2	8792.94	7568.45	8084.15
1440	Pdlim2	371.504	0.950118	0.228359	4.16063	3.17e-05	0.000329922	227.623	286.571	265.112	248.181	353.861	653.905	524.224	412.556
1441	Zfp523	233.183	1.13625	0.273098	4.1606	3.17e-05	0.000329922	140.366	144.468	177.279	198.896	132.475	284.336	284.778	502.867
1442	Gm21451	103.382	-1.49534	0.359451	-4.16008	3.18e-05	0.000330454	154.419	157.493	117.153	103.876	152.769	68.5871	37.1526	35.608
1443	Mrpl23	98.0075	1.71931	0.413487	4.15806	3.21e-05	0.000333147	64.4704	86.985	31.1448	28.9106	52.5268	206.343	178.096	135.585
1444	Metap1	828.782	-0.700163	0.168491	-4.15549	3.25e-05	0.000336679	991.655	890.7	1019.65	1010.09	911.421	538.375	525.1	743.261
1445	Ubn2	1849.88	-0.974042	0.234408	-4.15533	3.25e-05	0.000336693	1387.5	2435.92	2636.04	3083.41	1790.01	999.918	1223.43	1242.78
1446	Rpl30	3021.98	0.890617	0.214406	4.15387	3.27e-05	0.000338602	1739.75	2188.71	2062.53	3425.28	2021.93	4139.23	3585.74	5012.65
1447	Ddx26b	5358.85	-0.549786	0.132405	-4.15231	3.29e-05	0.000340694	6661.3	6285.97	5253.83	6364.02	5851.98	4565.46	4058.13	3830.12
1448	Eid2b	189.403	-1.21963	0.293957	-4.14901	3.34e-05	0.000345395	320.285	221.255	225.046	279.172	165.651	117.89	107.867	78.0567
1449	Tex264	1206.63	0.700155	0.168845	4.14674	3.37e-05	0.000348602	995.252	973.098	861.419	880.292	1178.71	1845.85	1381.76	1536.64
1450	Tubgcp5	2046.69	-0.660261	0.159247	-4.14614	3.38e-05	0.000349028	2838.91	2260.31	2264.97	2018.57	2476.23	1291.19	1563.07	1660.28
1451	Uqcrh	1120.81	0.708462	0.170868	4.14625	3.38e-05	0.000349028	764.198	916.124	881.519	935.351	1018.61	1477.07	1209.03	1764.6
1452	Asf1b	113.505	1.35878	0.327744	4.14585	3.39e-05	0.000349232	85.2283	95.1024	60.6959	42.7446	73.1305	197.871	168.591	184.672
1453	Anapc15	580.715	0.840802	0.202841	4.14512	3.4e-05	0.000350112	468.887	481.261	424.783	443.258	419.287	996.615	575.464	836.167
1454	Mbd4	376.291	0.883128	0.213067	4.14484	3.4e-05	0.000350293	329.392	283.55	216.1	260.607	342.968	575.119	529.075	473.514
1455	Mzt2	623.69	-0.874648	0.211119	-4.1429	3.43e-05	0.000353025	768.986	805.742	686.01	708.28	783.095	495.024	277.129	465.256
1456	Slc36a2	139.352	-1.52349	0.368024	-4.13966	3.48e-05	0.000357804	179.889	211.328	164.57	242.585	132.8	91.4254	66.9486	25.2701
1457	Rps23	1949.47	0.795027	0.192118	4.13822	3.5e-05	0.000359818	1247.31	1614.06	1384	2137.52	1256.46	2541.07	2656.24	2759.14
1458	Acot9	666.639	0.883359	0.213501	4.13749	3.51e-05	0.000360715	527.996	429.438	433.757	434.659	700.726	795.014	963.098	1048.42
1459	Agpat2	433.861	1.19513	0.288875	4.13717	3.52e-05	0.000360963	194.338	313.949	223.277	488.703	241.358	748.362	560.301	700.604
1460	Txn1	734.179	0.718537	0.173717	4.13625	3.53e-05	0.000362163	531.002	607.884	602.373	552.496	648.054	854.775	877.784	1199.06
1461	Umodl1	22.1672	-4.98873	1.20671	-4.13416	3.56e-05	0.00036523	54.4079	31.3414	10.5567	29.2395	43.2268	0	0	8.56527
1462	Ch25h	108.285	4.75298	1.15063	4.13077	3.62e-05	0.000370158	25.2294	0	17.5546	4.03565	4.36916	325.471	176.644	312.975
1463	Il10ra	18369.6	-0.672042	0.162686	-4.13092	3.61e-05	0.000370158	25931.7	24412.3	20780.1	19122.5	16506.7	13788.5	12515.2	13899.8
1464	Plekhm2	470.323	1.00833	0.244208	4.12897	3.64e-05	0.0003728	224.969	386.242	368.158	377.47	339.984	650.309	511.528	903.921
1465	2610008E11Rik	625.396	-0.719267	0.17421	-4.12875	3.65e-05	0.000372911	766.118	781.053	726.586	762.843	638.785	409.365	523.794	394.624
1466	Pcdhga1	96.4901	-1.43111	0.347006	-4.12416	3.72e-05	0.000380159	109.128	104.736	150.823	141.955	127.706	37.5363	62.0891	37.9476
1467	Nlrp1c-ps	386.917	-1.15013	0.278932	-4.12333	3.73e-05	0.000381272	673.848	418.525	478.041	351.933	518.059	303.629	156.622	194.682
1468	Snx18	3679.13	-0.912229	0.221291	-4.1223	3.75e-05	0.000382719	3549.74	3336.81	5460.15	6080.21	3877.98	2136.58	2031.9	2959.69
1469	Zfp385c	92.2887	-1.58606	0.385273	-4.11671	3.84e-05	0.000391853	143.601	88.6033	99.2611	123.778	162.073	36.2342	56.5433	28.2161
1470	Cd97	150.552	4.362	1.06064	4.11262	3.91e-05	0.000398588	22.5789	0.708468	5.76864	9.44401	52.5986	353.724	408.343	351.246
1471	Osbpl8	1089.3	0.654195	0.15931	4.10643	4.02e-05	0.000409141	1040.5	892.314	947.777	884.872	716.638	1368.24	1397.54	1466.56
1472	Mycl	385.822	-0.942918	0.229772	-4.10372	4.07e-05	0.000413694	511.549	472.803	545.893	487.454	340.158	299.565	211.882	217.273
1473	Tmem30a	4563.16	-0.529882	0.129129	-4.1035	4.07e-05	0.000413805	5602.41	4577.16	5371.6	5372.07	4856.47	3632.11	3260.08	3833.4
1474	Rps4x	7309.21	0.768659	0.187345	4.1029	4.08e-05	0.000414586	4447.91	6054.98	5519.44	8033.81	4855.41	9395.57	9492.91	10673.6
1475	Prdx5	1526.55	0.800069	0.19506	4.10166	4.1e-05	0.000416543	1358.06	1090.67	1091.59	1214.6	1205.3	2117.64	1451.88	2682.68
1476	Rdh14	942.384	-0.630722	0.154068	-4.0938	4.24e-05	0.000430626	954.673	1118.82	1054.49	1186.39	1122.28	788.354	643.76	670.31
1477	Cnot2	2171.73	-0.663826	0.162207	-4.09247	4.27e-05	0.000432806	2672.52	2882.97	2265.39	2321.88	2452.25	1814.15	1274.01	1690.65
1478	mt-Atp8	1546.56	0.784612	0.191778	4.09125	4.29e-05	0.000434809	1160.01	1244.19	1239.75	1240.2	1187.24	2135.33	1437.59	2728.18
1479	Rgmb	1670.52	-0.817705	0.199989	-4.08875	4.34e-05	0.000439208	1462.23	1732.07	2438.2	2541.94	1800.77	1217.08	1135.82	1036.06
1480	Ifi44	91.8935	1.45996	0.357089	4.0885	4.34e-05	0.0004394	39.4857	78.8629	54.0324	54.2771	51.861	140.128	202.659	113.842
1481	Gm6565	18.5132	-6.91013	1.69035	-4.08799	4.35e-05	0.00044004	40.7161	56.1289	0	46.7088	4.55137	0	0	0
1482	Mapk9	727.462	-0.799607	0.195606	-4.08785	4.35e-05	0.00044004	914.308	787.071	933.949	970.462	737.44	566.585	552.364	357.516
1483	Inpp5d	21210.2	-0.675444	0.165378	-4.08424	4.42e-05	0.000446618	27846.5	27009	21504.9	23918.9	23045.4	16420.3	11720.6	18216.3
1484	Tmem51	132.958	5.21682	1.2775	4.08362	4.43e-05	0.000447526	2.65971	0	1.6666	15.0532	26.0316	343.196	326.703	348.354
1485	Dock9	391.352	-1.27539	0.312413	-4.08238	4.46e-05	0.000449602	490.842	600.735	212.701	609.859	590.643	197.577	187.421	241.04
1486	Mib2	3156.33	-0.631811	0.15484	-4.08041	4.5e-05	0.000453126	4155.49	3879.41	2946.72	3331.5	3897.5	2614.23	2264.11	2161.65
1487	Stambpl1	1636.41	-0.678519	0.166301	-4.08008	4.5e-05	0.000453481	2305.39	1931.8	1789.6	1692.96	1801.45	1365.57	992.174	1212.3
1488	Cryba4	951.046	-0.932606	0.22864	-4.07893	4.52e-05	0.000455332	1305.71	1146.92	957.911	1148.2	1218.74	693.447	366.892	770.541
1489	Kpna1	1790.47	-0.665793	0.163232	-4.07882	4.53e-05	0.000455332	2497.75	2055.24	2195.45	1728.48	1918.36	1167.88	1465.86	1294.76
1490	Slco2b1	39664.2	-0.811156	0.198976	-4.07665	4.57e-05	0.000459284	61862	50000.1	43939.4	32174.5	48482.8	32408.4	22260.9	26185.8
1491	Eef1a1	51672	0.567242	0.13915	4.07649	4.57e-05	0.000459293	46475.1	46121.5	40060.6	48677.1	37489.7	65800	57120.9	71631.5
1492	Snta1	920.518	-0.80909	0.198608	-4.0738	4.63e-05	0.000464311	1120.91	1070.55	1296.56	1220.33	777.003	705.393	537.522	635.88
1493	Atp2a2	752.868	-0.720894	0.177018	-4.07244	4.65e-05	0.000466728	720.611	858.753	881.634	1077.46	883.894	574.823	545.974	479.794
1494	Kdm1b	803.297	-0.77894	0.191338	-4.07102	4.68e-05	0.000469267	1068.82	1005.8	867.747	815.015	1021.04	629.031	617.574	401.353
1495	Prkch	854.35	0.873207	0.214558	4.0698	4.71e-05	0.000471408	590.736	615.083	856.515	464.68	721.671	1184.86	997.377	1403.88
1496	1810011H11Rik	1729.51	-0.76953	0.189206	-4.06715	4.76e-05	0.000476256	2159.05	1967.28	1836.67	1804.55	2474.61	1555.9	991.563	1046.45
1497	Slc24a3	163.326	-1.20949	0.297384	-4.06711	4.76e-05	0.000476256	232.527	245.367	207.287	216.891	134.533	100.646	77.3595	91.9979
1498	Glmp	5759.83	0.681182	0.167717	4.06149	4.88e-05	0.00048749	5667.84	5030.24	4051.92	4091.72	4634.69	7984.25	6033.76	8584.24
1499	Tmem123	1874.4	0.634485	0.156225	4.06136	4.88e-05	0.00048749	1532.47	1794.47	1527.95	1467.34	1425.27	2149.74	2191.17	2906.82
1500	Gsg1	195.37	-1.0313	0.253948	-4.06106	4.89e-05	0.000487784	253.769	199.834	224.372	248.94	288.867	130.059	128.428	88.6869
1501	Fam185a	265.93	-0.874926	0.215465	-4.06063	4.89e-05	0.000488358	370.234	289.151	332.325	312.141	301.358	154.57	197.763	169.902
1502	Akap10	1683.2	0.584409	0.144007	4.0582	4.95e-05	0.000493132	1552.84	1282.72	1504.17	1293.28	1458.55	2379.41	1922.66	2071.99
1503	Zfp40	454.65	-0.86322	0.21272	-4.05801	4.95e-05	0.000493208	544.504	631.356	523.435	526.378	515.583	381.228	302.933	211.786
1504	Podxl2	78.4064	-1.5138	0.373544	-4.05254	5.07e-05	0.000504547	77.5049	121.067	124.567	113.238	80.1892	35.0126	35.3694	40.3033
1505	Procr	73.6656	-1.69702	0.418938	-4.05076	5.11e-05	0.00050808	105.426	111.762	92.0763	69.8071	112.844	19.9623	25.6934	51.7536
1506	Smim1	656.441	0.756249	0.186764	4.04922	5.14e-05	0.000511098	416.852	651.436	506.25	494.347	533.156	914.459	789.085	945.943
1507	Nfia	1513.56	-0.852127	0.21047	-4.04869	5.15e-05	0.000511914	2265.62	1878.78	1706.26	1937.83	1306.49	896.384	1301.03	816.106
1508	Impdh1	94.8295	2.03057	0.501657	4.04773	5.17e-05	0.000513667	57.5163	48.1688	38.558	61.7004	16.9665	143.779	316.513	75.4347
1509	4930453N24Rik	657.794	-0.732868	0.181114	-4.04646	5.2e-05	0.000516131	624.308	873.985	871.023	728.634	773.685	502.323	485.892	402.498
1510	Tnrc6b	1799.94	-0.616825	0.152499	-4.04479	5.24e-05	0.000519472	1930.22	2026.77	2443.59	1844.03	2112.13	1533.24	1261.3	1248.27
1511	Vps37a	997.691	-0.655279	0.162072	-4.04314	5.27e-05	0.000522791	1221.04	1178	1227.25	1029.1	1105.9	682.246	645.491	892.502
1512	Zfhx3	3507.78	-0.688563	0.170441	-4.0399	5.35e-05	0.000529723	5119.12	3952.71	3319.11	3586.39	4480.17	2864.8	2452.67	2287.24
1513	Flna	3209.39	0.975205	0.241419	4.03947	5.36e-05	0.00053034	3752.8	2606.8	1815.2	1969.91	1640.35	5263.5	4368.82	4257.72
1514	Zdhhc6	43.6945	-2.45821	0.608936	-4.0369	5.42e-05	0.000535828	46.3915	109.881	58.8444	64.8144	39.9995	14.312	15.313	0
1515	Ccnd3	3620.78	-0.608838	0.150958	-4.03317	5.5e-05	0.000544058	4320.47	4488.92	3607.46	4889.04	3487.17	2827.12	2743.14	2602.88
1516	Eva1b	367.806	0.992071	0.246172	4.02999	5.58e-05	0.000551089	316.961	186.289	229.774	281.884	321.652	482.815	449.164	673.909
1517	Mrs2	799.834	-0.709768	0.176174	-4.0288	5.61e-05	0.000553529	1133.24	959.772	903.778	922.211	757.545	520.055	580.859	621.211
1518	Anxa4	940.61	0.673738	0.167259	4.02812	5.62e-05	0.000554771	643.295	849.974	739.127	715.965	897.142	1172.71	1365.35	1141.31
1519	Ctsa	35754.7	0.596854	0.148459	4.02032	5.81e-05	0.000573045	33899.1	32447.8	26916.4	25598	31088.6	48170.4	38237.9	49679.4
1520	Fam212a	2066.75	-0.722377	0.179688	-4.02018	5.82e-05	0.000573045	2614.02	2704.86	2276.67	2069.85	2463.56	1870.62	1160.35	1374.05
1521	Dut	92.6355	1.47477	0.366887	4.01969	5.83e-05	0.000573868	73.3321	46.6315	76.1653	38.4351	47.0103	197.752	147.646	114.111
1522	Rpl36a	1374.29	0.88612	0.22048	4.01905	5.84e-05	0.000575047	767.041	1109.49	926.547	1537.15	869.539	1959.02	1686.71	2138.84
1523	Got1	1132.38	2.1128	0.525748	4.01866	5.85e-05	0.000575616	606.642	463.673	492.366	466.001	488.022	1016.73	1069.98	4455.59
1524	Fgf11	152.482	-1.13668	0.283053	-4.01576	5.93e-05	0.000582356	176.015	178.048	195.72	250.778	163.97	96.0372	94.5547	64.7332
1525	Siglecg	108.77	-2.23997	0.557869	-4.01523	5.94e-05	0.000583284	237.765	160.263	142.494	125.365	110.744	12.5882	74.4263	6.51595
1526	Ube2d2a	1726.7	-0.679345	0.169252	-4.0138	5.97e-05	0.000586449	1708.71	1875.08	1745.08	2486.66	2237.98	1222.24	1362.02	1175.87
1527	Amdhd2	796.738	0.846823	0.211043	4.01256	6.01e-05	0.000589146	691.774	715.589	437.326	524.962	694.519	1270.44	908.247	1131.05
1528	Gm5431	552.453	0.825778	0.205968	4.00925	6.09e-05	0.000597072	447.967	562.061	425.172	331.065	373.125	804.3	689.708	786.224
1529	Myc	1158.64	1.00251	0.250193	4.00693	6.15e-05	0.000602591	928.526	780.936	756.619	503.158	1234.82	1728.35	1348.81	1987.88
1530	Bcl2a1d	271.297	1.21702	0.303742	4.00677	6.16e-05	0.000602605	134.789	206.202	122.104	187.114	248.44	321.531	349.355	600.838
1531	Slc43a2	1962.29	0.587095	0.146538	4.00642	6.16e-05	0.000602703	1983.24	1630.69	1638.14	1580.75	1423.61	2573.62	2311.49	2556.78
1532	Snrpf	342.555	0.91202	0.22764	4.00642	6.16e-05	0.000602703	188.964	289.67	247.59	276.097	277.069	490.911	380.618	589.519
1533	Gm4980	827.701	-0.943901	0.235618	-4.00606	6.17e-05	0.000603212	1123.77	715.139	1184.33	1283.55	739.126	588.925	431.863	554.906
1534	4930594C11Rik	499.213	-0.941176	0.235033	-4.00444	6.22e-05	0.000606965	785.512	513.694	590.005	505.956	654.868	416.969	261.084	265.616
1535	Rassf4	3560.06	0.765186	0.191141	4.00326	6.25e-05	0.000609615	3832.71	3031.4	2703.5	2207.76	2329.18	5436.46	4269.67	4669.76
1536	Hspa4l	38.8386	3.7503	0.937513	4.00027	6.33e-05	0.000616974	21.3034	0	7.47999	0	6.77848	89.7673	126.034	59.3452
1537	Dennd4a	3048.79	-0.876301	0.21923	-3.99718	6.41e-05	0.000624257	4555.09	3775.72	3423.4	3255.66	3347.65	1635.19	1463.56	2934.08
1538	Tmem138	84.1762	-1.74084	0.435503	-3.9973	6.41e-05	0.000624257	53.1331	160.415	123.472	118.685	118.126	45.3979	30.8565	23.3242
1539	Mboat1	333.667	-0.809952	0.202688	-3.99605	6.44e-05	0.00062683	374.197	415.951	401.606	414.779	397.074	258.539	241.778	165.41
1540	Ang	3937.94	-0.571806	0.143153	-3.99436	6.49e-05	0.000630906	4021.89	5104.81	4136.77	4173.07	5003.07	3261.67	2727.49	3074.72
1541	H2-T23	7038.12	0.57078	0.142965	3.99245	6.54e-05	0.000635607	6017.66	6590.75	5459.57	5173.92	6526.18	9798.4	7666.92	9071.59
1542	Klf12	86.6906	-1.61049	0.403404	-3.99225	6.54e-05	0.000635737	98.3713	156.539	144.123	67.2244	110.308	29.4987	40.5245	46.9359
1543	Bin1	1345.57	-0.850564	0.213078	-3.99179	6.56e-05	0.000636549	2045.4	1774.08	1348.71	1454.1	1472.7	987.777	1080.92	600.893
1544	Tbc1d30	65.2062	1.92413	0.482195	3.99036	6.6e-05	0.000639997	29.3245	21.1625	28.1778	27.8461	49.0008	67.19	86.9375	212.01
1545	Gpr31b	22.6955	3.96721	0.994367	3.98969	6.62e-05	0.000641393	0	2.17877	0	3.03325	11.2655	44.3988	24.4635	96.2245
1546	Stap1	78.944	1.58734	0.397937	3.98894	6.64e-05	0.00064301	21.8187	38.0816	66.253	53.3536	46.1926	125.378	161.252	119.223
1547	Ndufc1	414.032	0.843688	0.211579	3.98758	6.68e-05	0.000645872	340.797	324.294	262.082	369.276	294.761	637.766	440.503	642.776
1548	Rilpl2	194.492	0.982826	0.246467	3.98766	6.67e-05	0.000645872	144.671	131.111	137.859	150.247	141.607	274.188	213.163	363.087
1549	Clec2d	34.9395	2.55809	0.641753	3.9861	6.72e-05	0.000649494	6.62962	16.3298	2.51107	21.2424	14.4079	94.4429	47.3024	76.6499
1550	Chil1	99.7349	-1.40171	0.351763	-3.98482	6.75e-05	0.000652577	137.385	134.235	79.913	140.973	154.793	47.6483	46.0583	56.8738
1551	Plxna1	175.983	1.35099	0.339088	3.9842	6.77e-05	0.000653845	84.0104	169.253	140.769	85.4046	78.8649	357.736	291.078	200.745
1552	Rhobtb2	144.274	-1.45671	0.365714	-3.9832	6.8e-05	0.0006562	226.58	178.535	230.433	138.274	181.369	52.7165	110.305	35.9763
1553	B2m	50775.2	0.565323	0.141997	3.98122	6.86e-05	0.00066125	36506.6	47786.5	40070.5	46679.6	44111.2	62235.6	56365.2	72446.7
1554	Snrpd2	460.424	0.746088	0.187425	3.98072	6.87e-05	0.00066221	367.7	386.775	362.521	367.899	341.037	606.497	496.948	754.011
1555	R3hcc1l	849.39	0.808774	0.203247	3.97927	6.91e-05	0.000665841	785.705	574.62	687.768	740.929	515.388	1086.24	955.882	1448.59
1556	Myl6	1904.58	0.686462	0.172629	3.97651	6.99e-05	0.00067319	1545.29	1581.18	1405.81	1754.33	1455.71	2658.8	1868.24	2967.26
1557	B4galt5	131.668	1.67087	0.420401	3.97447	7.05e-05	0.000677247	80.3614	51.0194	76.6661	78.0399	69.6975	80.4951	251.424	365.637
1558	Klf11	254.242	1.44971	0.364734	3.97469	7.05e-05	0.000677247	247.053	66.0364	125.337	136.818	200.532	503.201	449.935	305.022
1559	Rbm12b1	375.905	-1.23279	0.310173	-3.97451	7.05e-05	0.000677247	562.175	418.217	552.111	545.419	331.927	248.226	262.177	86.9886
1560	St3gal2	428.169	-1.25431	0.315589	-3.97451	7.05e-05	0.000677247	493.302	553.793	607.617	562.977	525.312	374.025	213.257	95.0739
1561	Relt	413.215	0.957026	0.240806	3.97426	7.06e-05	0.00067741	275.755	305.146	233.805	260.465	447.801	521.304	620.189	641.251
1562	2700081O15Rik	54.3196	-1.77209	0.446148	-3.97198	7.13e-05	0.000683476	86.4135	59.3593	56.6713	93.4107	77.3489	24.259	23.3615	13.7326
1563	Gck	16.9147	-4.18753	1.05466	-3.97049	7.17e-05	0.000687336	32.2019	29.9388	31.8677	12.9068	21.1638	1.16076	0.695764	5.38232
1564	Rpl24	2267.27	0.72845	0.183546	3.96876	7.22e-05	0.00069189	1470.45	1790.69	1765.29	2435.13	1628.7	3095.8	2567.56	3384.56
1565	Dbi	686.022	0.730308	0.184273	3.96318	7.4e-05	0.000707824	487.884	479.448	617.342	624.276	532.971	860.661	785.279	1100.32
1566	2022-03-01	3785.35	-0.694344	0.175222	-3.96264	7.41e-05	0.000708959	5279.51	4808.37	4373.4	3263.95	4365.16	3096.89	2323.94	2771.61
1567	Uso1	126.921	-1.42627	0.359981	-3.96207	7.43e-05	0.000710205	146.541	208.987	94.5817	200.265	176.832	72.1566	44.337	71.6648
1568	Kbtbd2	1638.48	-0.715857	0.180734	-3.96084	7.47e-05	0.000713433	2402.98	1924.32	1786.79	2037.34	1458.14	1311.12	1154.41	1032.78
1569	Hsd17b12	2325.94	0.487581	0.123241	3.95633	7.61e-05	0.000726573	2056.69	2029.38	1825.08	2116.66	2069.79	2689.43	2769.01	3051.44
1570	Klhl12	374.991	-1.0611	0.268401	-3.95339	7.71e-05	0.00073507	492.856	498.759	442.757	410.242	494.146	164.125	341.695	155.35
1571	Tmem199	1006.23	-0.664505	0.168095	-3.95316	7.71e-05	0.000735324	1344.87	1178	998.787	1156.82	1149.69	754.554	616.931	850.186
1572	Calm2	13482.2	-0.516425	0.130732	-3.95026	7.81e-05	0.000743819	14259.3	16052.6	14128.7	15187.6	16341.9	11138.7	9081.4	11667.5
1573	Atp6v0e	2636.35	0.594432	0.150488	3.95004	7.81e-05	0.000744029	2301.75	2220.98	1752.63	2288.5	2496.13	3392.31	3038.94	3599.56
1574	Eif3k	1275.54	0.626057	0.15857	3.94815	7.88e-05	0.000749434	1143.06	1054.18	834.873	1135.08	1132.45	1778.06	1508.52	1618.13
1575	Uhrf1bp1l	421.542	1.04105	0.26381	3.9462	7.94e-05	0.000755082	425.263	335.858	231.99	316.107	207.516	676.469	714.566	464.566
1576	Gm11518	412.656	1.10453	0.279954	3.94539	7.97e-05	0.0007567	296.807	305.937	252.215	339.2	239.456	569.018	360.723	937.888
1577	Rpl27-ps3	412.656	1.10453	0.279954	3.94539	7.97e-05	0.0007567	296.807	305.937	252.215	339.2	239.456	569.018	360.723	937.888
1578	Mki67	155.167	1.3519	0.342698	3.94487	7.98e-05	0.000757358	54.6774	127.476	103.492	72.4768	129.566	308.412	188.12	257.115
1579	Serpinf1	1513.96	0.521015	0.132072	3.94492	7.98e-05	0.000757358	1260.9	1342.97	1397.99	1192.39	1303.24	1829.16	1745	2040.04
1580	Rpl35a	3001.38	0.887189	0.224956	3.94382	8.02e-05	0.000760207	1688.08	2090.09	2172.94	3436.85	1985.76	3692.99	3638.21	5306.11
1581	Ctla2b	273.794	0.994127	0.252128	3.94294	8.05e-05	0.000762519	223.124	207.6	187.607	210.255	161.564	321.292	320.602	558.304
1582	Gusb	8848.36	0.533448	0.135398	3.93985	8.15e-05	0.000771924	8884.47	7947.75	7039.88	6489.24	7522.25	11089.3	10462	11352
1583	Slc25a35	205.816	-1.76963	0.449257	-3.93902	8.18e-05	0.000774129	359.604	206.701	268.814	286.136	286.95	159.559	65.4402	13.3221
1584	Tlr12	1410.33	-0.644232	0.163654	-3.93654	8.27e-05	0.000781655	1668.76	1911.38	1590.69	1402.57	1576.23	1181.14	884.915	1066.93
1585	Pebp1	1860.87	0.638166	0.162145	3.93579	8.29e-05	0.000783623	1682.84	1660.3	1312.03	1542.05	1488.43	2303.99	2004.98	2892.33
1586	Slc16a10	673.131	0.855342	0.217468	3.93319	8.38e-05	0.000791642	417.18	593.119	484.057	668.451	411.112	808.652	859.055	1143.42
1587	Vapa	2584.69	-0.519128	0.131994	-3.93298	8.39e-05	0.000791836	2866.06	2906.81	2716.17	3225.22	2844.52	1967.55	1859.48	2291.74
1588	Epha4	88.5546	1.75614	0.446543	3.93274	8.4e-05	0.000792117	57.3854	32.3875	77.7864	36.0938	31.1433	133.632	97.0447	242.964
1589	Tmem147	892.479	0.734692	0.186832	3.93236	8.41e-05	0.000792885	785.061	747.271	679.499	650.055	697.383	1065.79	957.436	1557.34
1590	Akirin1	2524.24	-0.627034	0.159632	-3.92801	8.57e-05	0.000806848	3228.94	3013.99	2457.78	3013.63	2809.08	1781.9	1602.77	2285.8
1591	Lmna	157.614	1.22811	0.312712	3.92729	8.59e-05	0.00080869	142.029	81.4203	90.9762	113.201	92.9052	166.038	241.547	332.796
1592	Ube2l6	777.799	0.66745	0.169957	3.92716	8.6e-05	0.00080869	700.799	674.992	613.583	554.346	652.603	1147.97	1055.89	822.207
1593	E130309D14Rik	11.3904	4.89681	1.24712	3.9265	8.62e-05	0.000810389	0	0	3.32163	0	1.22896	17.8473	12.9092	55.8163
1594	Ube2v2	530.447	-0.808148	0.205887	-3.9252	8.67e-05	0.00081429	684.591	561.022	596.831	571.041	732.22	341.06	288.628	468.184
1595	Mfsd12	1592.18	0.783758	0.199721	3.92427	8.7e-05	0.000816923	1627.99	1169.22	1250.22	1136.7	1074.35	2249.84	1588.74	2640.39
1596	Zfp385a	382.121	-1.06581	0.271694	-3.92285	8.75e-05	0.000821231	647.926	391.697	345.188	479.317	523.652	286.504	236.984	145.702
1597	Atat1	1230.32	-0.673934	0.17183	-3.9221	8.78e-05	0.000823265	1475.46	1515.11	1063.54	1602.6	1503.53	952.956	918.716	810.653
1598	Slc29a3	14819.3	-0.780341	0.199036	-3.92061	8.83e-05	0.000827883	23061.7	18621	16763.6	12191.4	17234.8	12594.4	9499.55	8588.2
1599	Vdac2	3379.5	-0.586918	0.149806	-3.91785	8.93e-05	0.000836871	3555.97	3916.08	3909.64	4362.05	3554.61	2532.26	2165.08	3040.32
1600	Mafb	10554.3	-0.680596	0.173737	-3.91739	8.95e-05	0.000837939	16276	12815.2	10702.1	11760.1	9880.07	8166.06	6764.37	8070.47
1601	H1f0	1367.9	0.70927	0.181133	3.91574	9.01e-05	0.000843168	1355.17	1177.55	946.459	932.843	1106.65	1925.17	1466.26	2033.06
1602	Epha2	438.172	-1.00307	0.256188	-3.91537	9.03e-05	0.000843948	502.011	415.34	422.809	556.02	803.015	241.129	311.019	254.035
1603	Arhgap21	352.459	1.0151	0.259273	3.91518	9.03e-05	0.00084409	300.851	192.514	359.397	224.45	195.184	537.786	444.002	565.49
1604	Cacna1s	93.6105	-1.82012	0.464913	-3.91497	9.04e-05	0.000844286	211.208	147.04	69.7023	123.496	93.0029	57.0544	27.2927	20.0881
1605	Fhod1	430.252	-0.900564	0.230139	-3.91313	9.11e-05	0.000850212	429.902	569.659	443.2	722.453	443.907	297.074	285.629	250.19
1606	Arpc5l	1902.99	-0.686396	0.175669	-3.90732	9.33e-05	0.000870372	2505.91	1911.85	1990.96	2423.67	2240.65	1367.24	1088.54	1695.11
1607	Tmem107	34.999	2.05414	0.525799	3.9067	9.36e-05	0.000872089	22.1771	19.0877	7.03259	14.3112	17.576	51.6251	68.1172	80.0648
1608	Aim1	44.27	2.77088	0.709368	3.90613	9.38e-05	0.00087358	0	22.2424	24.023	14.9074	6.73189	82.5334	59.5352	144.187
1609	Pkp4	562.82	0.632809	0.162021	3.90573	9.39e-05	0.000874475	422.881	420.975	524.209	496.198	467.122	699.531	727.106	744.534
1610	Stk26	142.807	-1.22975	0.314886	-3.9054	9.41e-05	0.000875135	205.516	170.145	206.505	186.674	149.187	106.909	73.8361	43.6849
1611	Efnb2	34.2024	-2.36953	0.607094	-3.90307	9.5e-05	0.000883062	49.3075	59.6979	39.798	54.7385	38.626	3.39943	12.0816	15.9703
1612	Hvcn1	6056.25	-0.71943	0.184443	-3.90055	9.6e-05	0.000891749	8969.96	7681.33	6739.47	5782.78	6330.07	4903.75	3306.72	4735.92
1613	Rasgrp1	60.2705	2.18889	0.561243	3.90007	9.62e-05	0.000892956	15.917	21.0825	40.3145	42.8665	10.549	109.138	189.085	53.2119
1614	Pik3c2b	226.58	-1.36473	0.350266	-3.89625	9.77e-05	0.000906597	431.611	240.488	257.063	256.851	290.764	70.0351	186.562	79.269
1615	Hist1h2bc	638.411	-0.803218	0.206193	-3.89548	9.8e-05	0.000908369	546.06	757.322	705.283	924.701	864.035	469.93	385.314	454.646
1616	Jdp2	31.9351	2.17978	0.559558	3.89553	9.8e-05	0.000908369	7.92001	18.3676	13.2393	17.9522	9.24555	51.7624	42.6805	94.3134
1617	Slc5a3	881.421	-0.832267	0.213783	-3.89304	9.9e-05	0.000916977	850.876	1351.74	1060.47	1102.85	892.099	467.809	561.875	763.641
1618	Mybph	50.1967	-2.11457	0.543481	-3.89079	9.99e-05	0.000924957	102.001	82.1631	87.1645	41.9344	42.7069	23.3944	14.1704	8.03944
1619	2610034B18Rik	61.0345	2.51787	0.647312	3.88974	0.000100353	0.000928404	30.5993	9.23575	50.7414	7.00535	14.2047	116.618	208.692	51.1794
1620	Zscan22	588.747	-0.712476	0.183211	-3.88883	0.00010073	0.000931319	816.93	599.038	618.894	744.936	678.674	445.782	447.734	357.985
1621	Clip2	260.633	-1.08195	0.278339	-3.88716	0.000101424	0.000936574	465.297	331.591	321.077	254.598	246.145	155.199	122.841	188.315
1622	Slc12a2	757.357	-0.723084	0.186013	-3.88729	0.000101371	0.000936574	917.192	799.758	825.202	1099.37	789.623	495.245	483.606	648.853
1623	Psmd6	1594.98	-0.487743	0.125527	-3.88555	0.000102098	0.000942217	1822.24	1626	1830.11	1843.54	1810.93	1297.49	1214.51	1315
1624	Gm4955	166.621	3.89241	1.00205	3.88445	0.000102561	0.000945911	0	50.1482	24.546	16.5629	42.9724	595.496	321.513	281.732
1625	Plekhg3	53.6708	3.01089	0.775687	3.88158	0.00010378	0.000956564	25.3315	3.25721	0	26.8727	19.0053	118.211	112.774	123.915
1626	H2afj	628.702	0.771742	0.19889	3.88025	0.000104349	0.000961219	486.51	487.028	407.424	613.166	499.612	862.874	1008.4	664.598
1627	Psmc6	996.695	-0.645415	0.166364	-3.87954	0.000104652	0.000963416	927.229	1179.51	1330.26	1135.11	1182.42	757.004	659.349	802.688
1628	Atg12	1132.46	-0.573361	0.147875	-3.87734	0.000105604	0.000970991	1419.24	1206.99	1363.1	1269.97	1187.64	882.977	771.629	958.151
1629	Pip4k2a	2023.94	-0.533226	0.137521	-3.87743	0.000105567	0.000970991	2323.57	2166.2	2481.09	2232.64	2247.81	1811.87	1417.61	1510.75
1630	Lbh	213.873	0.939983	0.242489	3.8764	0.000106014	0.000974154	136.24	196.88	165.817	148.704	151.59	359.476	312.021	240.253
1631	Rps3a1	5664.11	0.763043	0.196854	3.87619	0.000106105	0.000974393	3619.12	4792.69	4114.48	6395.66	3526.06	7600.97	6953.33	8310.58
1632	Trem2	28295.6	-0.656725	0.169544	-3.87349	0.000107288	0.000984653	36052.7	35872.5	30727.3	29830.6	31464.3	22859.6	15029.8	24528.3
1633	Card9	1082.34	-0.671007	0.173297	-3.872	0.000107947	0.000990095	1506.27	1255.6	1039.27	1392.66	1103.3	849.789	802.188	709.681
1634	Zfp286	166.381	-1.22609	0.316802	-3.87021	0.000108741	0.000996772	247.695	176.948	272.768	172.036	194.227	124.514	67.2563	75.6046
1635	Zfp395	180.915	1.18625	0.306627	3.8687	0.000109416	0.00100234	149.227	137.322	113.633	147.39	67.4988	331.229	257.868	243.152
1636	Tmem171	16.9746	4.55875	1.17879	3.86732	0.000110037	0.00100742	0	0	0.8408	0	7.55757	61.1745	27.8601	38.3639
1637	H2-K2	22.1528	2.51334	0.650303	3.86487	0.000111147	0.00101695	5.29683	8.17045	5.87262	11.1715	8.18695	26.6345	35.9941	75.8956
1638	Vangl2	271.396	-1.05157	0.272299	-3.86182	0.000112546	0.00102913	409.864	323.35	253.819	440.259	258.676	135.741	197.145	152.317
1639	Mcc	151.487	1.17854	0.305198	3.86157	0.000112663	0.00102957	82.4851	146.94	76.0288	90.2026	119.007	255.854	249.264	192.11
1640	Liph	583.483	-1.1191	0.289822	-3.86132	0.000112775	0.00102996	809.169	1016.87	703.496	502.209	614.997	408.421	191.123	421.575
1641	Armc2	160.167	1.67513	0.433943	3.86026	0.000113269	0.00103384	32.3076	83.3	96.9253	145.654	74.6187	151.771	274.808	421.951
1642	Atp5d	1864.64	0.617595	0.160023	3.85942	0.000113658	0.00103677	1788.18	1601.24	1359.07	1508.33	1498.97	2311.24	2007.79	2842.29
1643	Rpl21	3315.83	0.676635	0.175404	3.85758	0.000114515	0.00104394	2130.2	2694.92	2734.45	3537.87	2436.14	4217.76	3906.91	4868.41
1644	Zkscan4	263.837	-0.859946	0.22295	-3.85713	0.000114725	0.00104523	355.279	348.749	249.465	319.063	307.951	167.418	161.706	201.069
1645	Inafm2	883.442	-0.820835	0.212865	-3.85613	0.000115194	0.00104886	1332.85	1056.13	837.958	938.134	1098.42	621.176	441.523	741.347
1646	Tmcc2	39.8433	2.23418	0.579529	3.85517	0.000115647	0.00105235	12.6441	11.8576	35.308	8.97655	13.8515	93.6472	45.3178	97.1441
1647	Cdca7l	42.8428	1.98932	0.516193	3.85383	0.000116283	0.00105749	14.8332	25.5064	20.8459	15.5179	22.5724	40.269	118.358	84.8397
1648	Dusp8	65.6173	1.5832	0.410872	3.85327	0.000116549	0.00105926	46.6423	42.3311	41.456	21.8951	38.0124	141.078	125.648	67.8757
1649	Bid	1914.13	-0.602945	0.156489	-3.85295	0.000116701	0.00106001	2672.42	2345.98	2011.83	1859.79	2082.13	1436.74	1373.79	1530.34
1650	Fzd7	170.269	1.24831	0.32407	3.85196	0.000117175	0.00106366	117.262	77.6114	128.535	76.6549	157.627	259.134	202.209	343.122
1651	Mapkapk3	952.809	0.990947	0.25736	3.85043	0.000117909	0.00106968	695.254	672.971	675.623	579.431	840.068	1083.2	903.264	2172.66
1652	Tmem9	652.844	0.806711	0.209594	3.84892	0.00011864	0.00107566	661.533	455.374	562.259	357.551	515.086	954.534	872.576	843.84
1653	Map4	2615.87	-0.622911	0.162017	-3.84472	0.000120689	0.00109357	3232.92	3534.99	2699.94	2987.9	2594.82	2110.34	1619.82	2146.26
1654	Gtf3c4	399.284	-1.19073	0.309742	-3.84426	0.000120919	0.001095	302.952	546.198	744.936	525.309	408.403	142.16	290.823	233.492
1655	Atxn3	748.041	0.700954	0.182495	3.84096	0.000122554	0.00110913	594.329	715.795	635.385	471.531	608.538	860.217	1081.94	1016.59
1656	Snrpg	362.715	0.9055	0.235901	3.83848	0.000123798	0.00111971	205.258	291.408	224.826	355.424	283.991	526.912	417.994	595.91
1657	Bsn	387.135	-1.2102	0.31545	-3.83642	0.000124838	0.00112844	730.115	644.327	404.937	288.126	400.834	211.552	268.429	148.761
1658	Cacna1a	120.915	1.46257	0.381296	3.83578	0.000125167	0.00113073	53.9177	38.9914	83.9212	98.8172	93.2693	261.046	201.095	136.266
1659	Thbs1	394.059	1.38339	0.360909	3.83305	0.000126562	0.00114265	363.901	131.314	203.034	233.684	292.128	335.135	548.95	1044.33
1660	Atp5e	1046.12	0.653353	0.170477	3.8325	0.00012685	0.00114455	862.371	934.404	752.155	990.542	758.218	1340.55	1156.02	1574.71
1661	Nop10	682	0.72985	0.190458	3.83208	0.000127064	0.00114579	446.488	587.571	481.957	637.798	570.627	859.535	778.662	1093.36
1662	Shroom1	171.429	-1.59968	0.417497	-3.8316	0.000127314	0.00114736	315.216	245.775	214.772	213.296	165.705	117.25	85.3013	14.1148
1663	1110008P14Rik	75.4182	1.44582	0.377485	3.83015	0.000128067	0.00115345	43.2589	46.7296	43.0897	34.2726	60.5907	159.344	83.9875	132.073
1664	Parvg	5382.97	-0.605278	0.158132	-3.82768	0.000129356	0.00116436	7059.86	6811.22	5907.32	5215.83	5876.44	4350.09	3315.66	4527.32
1665	Nudt3	584.572	-0.682277	0.178299	-3.82659	0.000129932	0.00116884	716.182	590.841	664.913	749.46	678.335	468.004	353.255	455.584
1666	Dynlt1c	1131.1	0.600192	0.156935	3.82446	0.000131059	0.00117827	858.553	963.43	861.36	1004.79	1064.7	1608.44	1461.45	1226.09
1667	Gm20388	601.243	1.17786	0.307994	3.8243	0.000131145	0.00117834	539.552	478.22	305.301	198.256	516.319	1073.1	631.963	1067.24
1668	Ptpro	286.876	1.56283	0.409586	3.81563	0.000135837	0.00121976	219.819	101.087	123.18	295.974	93.0472	785.268	393.321	283.312
1669	Bcl2l1	5489.05	0.749694	0.196736	3.81067	0.000138592	0.00124376	5530.99	4541.57	3720.94	3207.26	4851.17	7528.67	5819.82	8712
1670	Hist2h2be	242.131	0.884824	0.232321	3.80863	0.000139742	0.00125332	220.944	140.672	175.368	210.859	174.449	373.219	317.54	323.999
1671	Tbx19	35.1782	-2.77853	0.729666	-3.80795	0.000140124	0.001256	38.0476	71.2006	77.001	26.5918	49.3204	3.33722	15.9267	0
1672	Clec10a	200.209	3.64101	0.956895	3.80503	0.000141789	0.00127016	19.8343	84.161	2.23054	65.5046	17.3548	433.32	599.813	379.456
1673	Tbc1d9b	4045	0.66192	0.173984	3.8045	0.000142091	0.00127211	4449.59	2971.04	2715.33	3176.3	3297.65	5581.09	5505.58	4663.4
1674	Arfip1	615.162	-0.618125	0.162602	-3.80145	0.000143851	0.00128709	765.201	779.749	675.065	677.994	641.323	493.47	431.935	456.561
1675	Speg	430.785	0.73295	0.192866	3.8003	0.000144522	0.00129232	289.102	386.707	333.241	386.723	321.116	506.268	551.642	671.481
1676	Dennd6a	812.345	-0.802341	0.211272	-3.79767	0.000146064	0.00130533	931.873	768.822	1254.33	1086.39	794.456	644.199	465.881	552.812
1677	Mtmr12	1022.08	0.655547	0.172723	3.79536	0.000147428	0.00131675	920.908	724.498	924.196	878.567	745.351	1160.76	1223.96	1598.39
1678	Lsm6	1141.61	-0.670221	0.176649	-3.79408	0.000148195	0.0013228	1508.68	1279.46	1252.59	1278.03	1322.57	1061.18	719.364	710.993
1679	Rpl10a	2167.31	0.695163	0.183273	3.79304	0.000148813	0.00132753	1851.49	1953.02	1420.84	2074.71	1492.95	3287.31	2268	2990.2
1680	Gdf3	43.7042	2.03575	0.536855	3.79198	0.000149449	0.00133241	15.9609	16.8442	6.65773	34.0532	27.203	75.9926	82.5569	90.3652
1681	Traf5	2002.81	-0.736814	0.194356	-3.79106	0.000150008	0.00133659	2466.95	2270.63	2772.16	2322.54	1963.33	1239.71	1885.17	1101.98
1682	Gtf2ird2	831.941	-0.765572	0.201976	-3.79041	0.000150401	0.0013393	1165.74	891.078	804.265	1047.68	1016.65	735.221	470.074	524.818
1683	Zfp652	3368.8	-0.775178	0.204521	-3.79021	0.000150522	0.00133958	4927.51	4151.3	3304.51	2768.97	4805.85	2751.49	2043.03	2197.76
1684	Dusp22	1074.24	0.598372	0.157902	3.78952	0.000150941	0.00134251	1029.51	866.731	873.613	935.349	811.895	1434.22	1503.13	1139.46
1685	Rpl31	1160.44	0.809988	0.213864	3.7874	0.000152235	0.00135241	895.785	1046.36	784.993	1118.68	670.698	1563.16	1222.7	1981.14
1686	Trip13	61.4957	1.80874	0.477567	3.7874	0.000152231	0.00135241	9.32288	43.9762	34.0339	29.9167	40.5713	98.3835	144.395	91.3661
1687	Rps10	2518.46	0.758941	0.200884	3.778	0.000158092	0.00140362	1766.7	2002.72	1948.05	2810.47	1464.87	3311.23	2996.03	3847.65
1688	Oas3	118.267	1.69564	0.448974	3.77669	0.000158925	0.00140934	35.866	90.159	46.6208	104.561	47.8018	250.01	282.203	88.9134
1689	Plbd2	3969.02	0.5282	0.139858	3.7767	0.000158922	0.00140934	4133.37	3328.12	3358.16	3059.52	3144.92	5121.45	4628.89	4977.71
1690	Grina	4518.29	0.594441	0.157407	3.77646	0.000159072	0.00140981	4132.84	2912.87	3550.37	4436.65	3935.26	6095.98	5360.23	5722.11
1691	Etl4	141.442	1.3737	0.363814	3.77583	0.000159479	0.00141258	54.784	158.867	90.2028	75.9175	62.194	234.053	251.536	203.98
1692	Fabp4	21.0945	2.7808	0.736651	3.77492	0.00016006	0.00141689	14.2932	4.99086	6.99116	2.28929	4.23174	42.501	25.982	67.4771
1693	Arap3	1490.9	-0.721572	0.191176	-3.77439	0.000160403	0.00141908	2007.18	2069.73	1412.51	1560.94	1692.55	1258.29	830.967	1095.05
1694	Gimap5	53.7576	-1.98475	0.525887	-3.77409	0.00016059	0.0014199	74.1103	84.88	38.8914	99.1754	81.6429	26.2605	21.5122	3.58815
1695	Cars	937.772	-0.530779	0.140723	-3.77179	0.000162082	0.00143225	1060.8	1172.37	1022.67	992.267	1046.41	702.204	733.721	771.739
1696	Commd6	461.833	-0.672336	0.178406	-3.76857	0.000164183	0.00144996	450.468	603.354	561.288	507.69	556.747	328.961	326.376	359.781
1697	Armcx2	456.865	-0.991923	0.263379	-3.76614	0.000165791	0.0014633	623.659	703.15	452.412	423.831	603.919	374.021	190.352	283.577
1698	Hivep2	422.744	2.24942	0.597692	3.7635	0.000167552	0.00147797	367.974	157.163	148.664	97.1901	107.637	585.881	441.036	1476.41
1699	Aldh1b1	56.9311	2.14228	0.569939	3.75879	0.000170738	0.00150519	27.6822	4.91463	38.3754	23.4812	30.7246	146.668	73.1692	110.434
1700	C2	101.103	1.22936	0.327114	3.7582	0.000171142	0.00150787	46.5094	85.2355	64.752	57.1354	80.1046	169.84	130.008	175.24
1701	Cmklr1	674.253	-0.561415	0.14942	-3.75729	0.000171761	0.00151243	792.45	784.979	719.947	752.423	782.763	552.95	474.524	533.991
1702	Pex5	1148.02	0.656887	0.174896	3.75587	0.000172742	0.00152017	1236.29	797.807	933.489	893.598	866.383	1566.79	1519.31	1370.51
1703	Rrm2	85.6809	1.86309	0.496128	3.75527	0.000173157	0.00152293	77.5573	46.4607	42.0426	38.9155	10.8086	151.845	123.704	194.114
1704	Eif2ak3	467.747	-0.997618	0.265716	-3.75445	0.000173726	0.00152703	462.751	524.209	474.613	783.553	647.714	319.595	359.355	170.189
1705	Clec2i	78.4399	1.7207	0.458505	3.75284	0.000174842	0.00153595	75.8314	25.0017	55.9335	37.2076	20.794	121.93	164.165	126.656
1706	Scmh1	898.87	0.626376	0.166983	3.75114	0.00017603	0.00154547	794.466	768.778	744.062	749.101	660.87	1135.76	950.792	1387.13
1707	Pts	683.87	-0.613496	0.163588	-3.75024	0.000176663	0.00155012	650.148	828.508	859.168	826.836	762.198	527.599	489.259	527.241
1708	Nsmce2	447.364	0.787943	0.210429	3.74446	0.000180786	0.00158537	357.64	327.61	291.608	437.688	347.988	750.259	539.08	527.042
1709	Gm8369	80.9736	1.34473	0.35957	3.73983	0.000184142	0.00161386	31.8085	62.9207	58.6849	42.5357	61.1557	128.263	151.169	111.252
1710	Slc7a5	150.622	-1.64357	0.439504	-3.73959	0.000184319	0.00161446	179.659	155.227	189.717	380.796	102.249	79.3312	34.5261	83.4715
1711	Gbas	701.045	0.737277	0.197176	3.73917	0.000184625	0.0016162	519.138	607.65	622.049	510.944	531.298	884.618	718.526	1214.14
1712	Nipa1	113.912	-1.13823	0.304576	-3.73709	0.000186165	0.00162873	159.798	134.655	148.629	131.696	140.858	48.3201	79.8902	67.4501
1713	Aifm2	34.4075	2.51486	0.673372	3.73473	0.000187919	0.00164311	15.0321	19.3491	19.0196	6.32832	3.91827	48.5578	127.327	35.7276
1714	Ulk4	159.065	-1.30658	0.349919	-3.73394	0.000188504	0.00164726	208.066	184.028	276.738	154.219	207.435	79.268	123.869	38.8936
1715	Mbp	908.179	0.853424	0.22861	3.73311	0.000189133	0.0016518	990.312	626.202	690.668	726.74	452.349	1311.86	1110.83	1356.47
1716	Uhrf1bp1	1251.99	-0.811177	0.217385	-3.73152	0.00019033	0.00166128	2075.69	1304.71	1128.44	1527.67	1435.15	1062.34	764.153	717.808
1717	Plaur	216.798	1.23625	0.331591	3.72824	0.000192823	0.00168206	126.152	218.094	98.5	96.6518	173.061	312.425	251.913	457.583
1718	Tagap	2814.96	-0.71125	0.190919	-3.7254	0.000195004	0.0017001	3288.91	4126.74	2603.48	3856.1	2597.23	2079.75	1727.27	2240.23
1719	Tle2	332.631	1.05159	0.282318	3.72484	0.000195437	0.00170288	305.064	139.008	204.303	260.855	273.326	468.714	378.823	630.959
1720	Map4k5	550.646	-0.962404	0.258463	-3.72356	0.000196429	0.00171053	623.33	574.032	756.01	816.716	591.413	198.5	416.978	428.187
1721	Htt	1766.17	0.45746	0.122922	3.72154	0.000198013	0.00172332	1563.87	1470.43	1631.92	1440.54	1637.65	2079.11	2132.81	2173.04
1722	Nhs	50.8381	-2.32971	0.626227	-3.72024	0.000199033	0.00173119	42.4548	31.0886	84.366	83.1135	126.289	9.29696	23.407	6.68897
1723	Map3k8	649.463	0.830795	0.223402	3.71884	0.00020014	0.00173981	389.308	741.042	503.862	452.918	423.694	912.314	858.95	913.613
1724	Atp6ap2	7672.15	0.436919	0.117538	3.71724	0.000201409	0.00174983	6200.93	7017.72	7071.62	6651.09	6912.1	8914	8557.87	10051.9
1725	Fam111a	1353.22	0.709169	0.190883	3.71521	0.000203035	0.00176089	928.845	1180.67	848.678	1092.48	1414.52	2041.73	1632.82	1685.99
1726	Lat2	2239.15	-0.678692	0.182674	-3.71531	0.000202954	0.00176089	2993.03	2991.91	2210.43	2323.02	2505.99	1907.99	1238.7	1742.11
1727	Mr1	572.292	-0.755303	0.2033	-3.71522	0.00020303	0.00176089	596.189	705.93	791.751	503.341	775.102	410.465	364.651	430.906
1728	Ogfod3	535.912	0.599052	0.161277	3.71443	0.00020366	0.00176529	468.322	484.843	404.699	411.966	476.195	659.822	707.743	673.706
1729	Mid1	3718.91	0.939841	0.253179	3.71215	0.000205503	0.00178023	4304.88	2280.62	2275.84	2023.47	2956.57	5661.14	6673.02	3575.74
1730	Dcun1d2	510.225	-0.652445	0.17583	-3.71067	0.000206715	0.0017897	566.141	609.106	501.416	674.252	602.75	397.637	352.8	377.699
1731	Slc22a21	188.961	1.14626	0.309316	3.70577	0.000210747	0.00182355	150.012	148.093	93.8919	95.8841	153.683	217.919	239.54	412.664
1732	Setx	924.09	0.63827	0.172379	3.70272	0.000213303	0.0018446	889.822	848.44	629.012	672.73	774.435	1109.14	1151.69	1317.45
1733	Fam131a	261.969	-0.891322	0.240972	-3.69886	0.000216567	0.00187175	369.228	303.964	329.767	345.563	234.994	195.692	142.902	173.645
1734	Cyba	8086.73	0.496277	0.134177	3.69866	0.00021674	0.00187216	6668.99	7535.88	6420.62	6399.2	8004.51	10073.9	8950.31	10640.5
1735	Rab3gap2	1350.09	0.566433	0.153222	3.69681	0.000218327	0.00188478	1014.74	1305.57	1129.56	1089.17	1166.34	1467.61	1712.86	1914.85
1736	Abcb1b	396.343	0.816892	0.221157	3.69372	0.000220994	0.00190671	334.437	376.136	254.622	238.988	333.156	453.574	581.771	598.063
1737	Casc3	682.771	-0.652782	0.176798	-3.69225	0.000222282	0.00191672	833.493	768.066	793.395	926.709	629.324	508.08	478.401	524.698
1738	Cox7a2l	2619.6	0.621641	0.168426	3.69088	0.000223477	0.00192592	2007.39	2292.5	1811.29	2640.62	2133.56	3186.33	2887.9	3997.22
1739	Ccdc163	386.977	0.867809	0.235511	3.68479	0.000228892	0.00197145	267.191	299.628	349.579	234.189	330.743	717.174	455.76	441.548
1740	Dbt	455.613	-0.784647	0.212989	-3.68399	0.000229615	0.00197654	677.864	525.563	518.873	435.876	541.712	250.994	352.574	341.45
1741	Smpd5	873.372	-0.78537	0.21326	-3.68268	0.000230795	0.00198555	1102.35	1049.79	836.641	1121.99	1073.23	798.589	427.162	577.221
1742	Ddah2	819.953	-0.611872	0.166279	-3.67979	0.000233427	0.00200704	1107.96	1034.21	829.108	831.374	911.055	642.623	611.135	592.153
1743	Esyt1	1428.35	0.507869	0.138049	3.6789	0.000234242	0.0020129	1254.97	1159.99	1193.8	1226.34	1332.17	1956.12	1570.99	1732.45
1744	Uhrf1	169.75	1.15349	0.313712	3.67692	0.000236063	0.00202738	108.381	169.336	67.3446	120.497	113.87	285.394	213.559	279.621
1745	S100a11	50.768	1.70284	0.463725	3.67208	0.000240584	0.00206502	40.7639	18.11	15.3722	37.3615	27.8783	90.14	101.728	74.7898
1746	Mmd	626.386	1.08297	0.294952	3.67169	0.000240953	0.00206701	538.386	268.086	405.563	463.248	522.755	652.069	689.782	1471.2
1747	Dennd1a	906.474	0.822013	0.22403	3.66922	0.000243294	0.00208516	620.539	898.109	471.448	779.615	755.196	1515.39	1183.24	1028.27
1748	Gm11652	118.399	-1.24747	0.339988	-3.66916	0.000243347	0.00208516	119.374	164.356	154.755	173.8	135.117	40.1615	63.5617	96.0668
1749	Tlcd2	282.723	0.829811	0.226225	3.66808	0.000244375	0.00209277	215.005	259.765	214.678	157.381	246.314	419.979	363.3	385.363
1750	Tsku	16.8402	3.66917	1.00042	3.66765	0.000244792	0.00209514	0	3.25212	1.65911	0	9.84706	41.7438	45.1617	33.0578
1751	Adap2	10058	-0.608135	0.165851	-3.66677	0.000245635	0.00210116	13207.9	12633.7	10144.4	9610.78	12135.4	8675.9	6054.23	8001.87
1752	Kcnip3	739.907	-0.813276	0.221828	-3.66625	0.000246133	0.00210421	1265.09	825.256	866.034	689.264	774.901	481.175	586.515	431.021
1753	Sec23b	1564.77	-0.555545	0.151556	-3.66562	0.000246743	0.00210822	1754.55	2027.42	1758.09	1463.07	1891.54	1189.06	1294.91	1139.5
1754	Fbxo22	741.304	-0.57336	0.156471	-3.66433	0.000247984	0.00211762	952.822	793.529	803.438	875.394	807.431	626.228	539.351	532.242
1755	Vipr1	250.453	-1.31261	0.358274	-3.66371	0.000248584	0.00212153	220.212	288.219	281.048	572.519	257.716	193.534	104.537	85.8423
1756	Fam83g	150.452	-1.63754	0.447025	-3.66319	0.000249098	0.00212471	260.919	169.109	245.393	180.959	162.071	99.8973	78.096	7.17508
1757	Psat1	548.62	-0.87714	0.239496	-3.66245	0.000249817	0.00212963	953.968	623.759	462.255	665.227	610.505	372.366	402.742	298.138
1758	Clasp2	3110.26	-0.548167	0.149685	-3.66213	0.000250129	0.00213108	2965.08	3497.97	3275.77	3793	4105.5	2587.67	2157.53	2499.56
1759	Coro1a	11683.4	-0.656215	0.1793	-3.65987	0.000252342	0.00214871	16908.1	14490	12157.5	11566.8	12571.3	10394.4	6649.73	8729.41
1760	Edrf1	590.338	0.643059	0.175737	3.65922	0.000252981	0.00215293	488.975	442.995	449.839	601.71	460.505	734.441	826.274	717.963
1761	Pnpo	940.122	-0.668448	0.182724	-3.65823	0.000253966	0.00216008	1187.67	1080.84	1099.86	957.436	1148.27	862.589	657.467	526.841
1762	Cd28	60.8086	2.10041	0.574228	3.6578	0.000254386	0.00216242	17.5798	35.0332	8.51654	13.6989	61.4014	116.509	125.511	108.219
1763	Gabbr1	434.998	-0.913147	0.250066	-3.65162	0.000260592	0.00221393	475.436	410.931	410.582	763.063	580.99	251.957	319.54	267.481
1764	Mrps24	511.411	0.609006	0.167017	3.64638	0.000265965	0.00225829	442.992	385.181	446.574	479.099	386.319	686.804	638.195	626.126
1765	Ppp1r2	1143.78	-0.571678	0.156791	-3.64611	0.000266243	0.00225937	1436.87	1199.04	1317.8	1443.36	1114.95	894.763	794.27	949.202
1766	Alg3	761.797	-0.647265	0.177595	-3.64461	0.000267796	0.00227126	1001	768.06	781.655	818.023	1029.71	520.151	542.406	633.376
1767	Cib1	686.277	-0.791241	0.217165	-3.6435	0.000268953	0.00227979	656.566	858.69	801.885	901.054	842.345	424.271	351.043	654.364
1768	BC022687	57.0501	-1.75421	0.481662	-3.642	0.000270526	0.00229182	76.7921	39.1959	91.787	103.382	78.6959	21.7436	26.812	17.992
1769	Eya4	429.922	-0.766014	0.21057	-3.63782	0.000274958	0.00232805	517.132	568.165	526.352	488.443	427.083	279.733	240.742	391.728
1770	Decr2	237.706	0.945022	0.259797	3.63754	0.000275256	0.00232926	215.559	154.469	207.589	136.256	175.712	368.691	401.344	242.031
1771	Mettl5	344.475	-0.761685	0.209745	-3.63148	0.000281799	0.00238328	360.709	492.152	362.006	364.355	451.767	248.559	216.682	259.574
1772	Prkg1	170.786	0.975902	0.268841	3.63004	0.000283379	0.00239529	86.124	131.862	164.274	120.938	122.526	229.696	268.894	241.971
1773	Akr1b10	2186.74	-0.538066	0.148233	-3.62987	0.000283568	0.00239554	2041.37	2760.9	2523.71	2390.65	2668.79	1865.54	1686.55	1556.38
1774	Srsf10	2415.17	-0.46827	0.129114	-3.6268	0.00028696	0.00242282	2644.4	2811.47	2620.9	2784.88	2620.85	2208.16	1784.19	1846.54
1775	Ptcra	101.636	-1.21191	0.334184	-3.62649	0.000287299	0.00242432	90.2023	117.547	126.292	163.647	145.069	56.0759	48.8826	65.3734
1776	Fyn	137.538	1.60471	0.442658	3.62517	0.000288772	0.00243538	159.963	72.4346	73.742	61.4254	27.6702	207.629	197.736	299.702
1777	Jun	2675.3	0.985091	0.271842	3.62376	0.000290349	0.0024473	2986.9	1832.5	1630.75	1022.62	2311.5	4702.38	3003.52	3912.24
1778	Bicd2	1801.86	-0.61773	0.1705	-3.62306	0.000291143	0.00245261	2216.77	1688.27	2102.57	2227.64	2118.72	1496.31	1056.56	1508.03
1779	Cc2d2a	155.155	1.03916	0.286844	3.62274	0.000291504	0.00245427	144.143	120.111	113.057	89.3859	84.95	207.956	195.807	285.83
1780	Klhl3	1143.53	-0.553125	0.152757	-3.62095	0.000293528	0.00246992	1528.73	1261.87	1314.47	1138.73	1253.26	957.22	836.965	857.008
1781	Gm8186	97.3091	1.27434	0.352013	3.62014	0.000294447	0.00247626	84.5574	63.1786	71.3869	56.3053	40.4189	147.48	116.42	198.726
1782	Banf1	725.293	0.622141	0.171885	3.61952	0.000295149	0.00247938	607.114	614.87	605.446	554.025	623.358	914.163	753.081	1130.29
1783	Dnajc13	1139.47	0.789696	0.218175	3.61955	0.000295114	0.00247938	969.918	1032.71	616.142	1174.21	685.537	1664.69	1497.91	1474.62
1784	Snx21	319.58	0.960078	0.265286	3.61902	0.000295716	0.00248276	249.417	157.91	190.33	270.296	314.136	549.268	386.823	438.46
1785	Shisa5	5169.11	0.514444	0.14222	3.61724	0.000297763	0.00249854	5060.03	4738.63	3812.43	4020.93	4635.62	6906.43	5764.17	6414.62
1786	Ccnd1	2362.24	0.718022	0.198569	3.61599	0.000299207	0.00250925	1933.68	1686.93	2083.07	1755.19	2029.96	2861.92	2238.97	4308.2
1787	Pcnxl2	202.392	-1.17688	0.325544	-3.61512	0.000300208	0.00251624	301.278	247.586	249.251	251.401	244.055	167.46	116.262	41.8426
1788	Prr5l	262.593	1.03797	0.287253	3.61344	0.000302156	0.00253115	247.575	213.143	145.212	169.504	152.948	317.8	293.751	560.813
1789	Gfap	53.7533	2.46485	0.682848	3.60967	0.000306593	0.00256688	26.7258	20.2981	38.7503	12.9971	1.14654	105.065	131.089	93.9552
1790	Mettl21a	1133.11	-0.553721	0.153539	-3.60637	0.000310505	0.00259818	1327.11	1374.28	1224.43	1237.55	1286.16	991.869	914.631	708.83
1791	Syce2	115.935	0.964189	0.26739	3.60593	0.000311038	0.00260119	81.3638	92.8949	78.9211	94.6554	78.0195	159.421	165.151	177.057
1792	Emp2	105.034	-2.22322	0.616663	-3.60524	0.000311861	0.00260662	151.477	192.821	139.95	117.386	149.622	10.1546	78.8635	0
1793	Rab43	636.358	0.792146	0.219758	3.60463	0.000312602	0.00261135	597.21	448.441	400.84	560.358	485.052	950.667	610.983	1037.31
1794	Hmgn1	1167.42	0.509223	0.141315	3.60346	0.000314007	0.00262016	1072.13	1020.92	883.674	1014.31	1039.52	1443.42	1308.5	1556.92
1795	Iqsec1	438.439	0.785634	0.218021	3.60349	0.000313979	0.00262016	355.666	290.036	341.472	332.307	403.083	721.592	433.625	629.729
1796	Cdk18	67.7494	2.21512	0.614786	3.60307	0.000314486	0.0026227	51.4904	8.12807	23.6754	25.0783	34.1686	37.0059	132.01	230.439
1797	Mb21d2	50.5748	1.92104	0.533245	3.60254	0.000315123	0.00262655	26.6304	7.60197	38.2021	19.9602	32.6139	116.948	95.2458	67.3961
1798	Plscr3	1213.82	0.668793	0.185774	3.60004	0.000318173	0.0026505	1266.14	904.139	883.696	961.672	963.809	1953.2	1420.42	1357.5
1799	Vps45	511.35	0.789926	0.219487	3.59897	0.000319478	0.00265989	393.954	297.191	393.046	405.604	505.869	630.205	598.619	866.308
1800	Itm2b	78018.3	0.440849	0.122515	3.59831	0.000320286	0.00266514	71215.6	70070.5	63397	74777.3	64517	94077.2	83773.9	102318
1801	Fuca1	4412.84	0.609087	0.169349	3.59663	0.000322369	0.00268098	4209.95	3649.46	2866.21	4093.66	3603.47	5462.14	4719.83	6697.99
1802	Ago1	66.1192	-2.05185	0.570587	-3.59603	0.000323106	0.00268412	57.8512	49.6847	101.079	135.901	124.191	33.1075	27.1393	0
1803	Mmp14	245.21	-1.11913	0.311209	-3.59608	0.000323053	0.00268412	308.781	422.022	348.26	262.847	205.294	164.168	171.305	79.0067
1804	Cmah	289.55	3.98013	1.10967	3.58677	0.000334802	0.00277975	24.2056	97.9571	80.5475	11.1214	1.2263	825.026	952.906	323.407
1805	Slc11a1	10068.5	0.668944	0.186557	3.58574	0.000336126	0.00278919	10858.3	8947.82	7079.74	6696.95	7636.53	14275.1	10422.6	14631.2
1806	Zfp740	1279.08	-0.637131	0.17774	-3.58463	0.00033756	0.00279955	1597.25	1543.6	1410.69	1303.45	1546.34	1009.29	1129.86	692.191
1807	Zfp191	1295.12	-0.601588	0.167908	-3.58284	0.000339873	0.00281716	1807.3	1370.06	1493.47	1339.35	1425.29	1147.81	929.827	847.873
1808	Cyb5d2	837.723	-0.607094	0.169498	-3.58172	0.000341338	0.00282775	1078.34	989.115	809.767	849.148	1074.14	593.209	612.638	695.43
1809	Maml3	1578.07	-0.646029	0.180444	-3.58021	0.000343312	0.00284252	2206.37	1621.4	1677.94	1949.1	1645.87	1043.87	1006.99	1473.06
1810	Glul	5644.67	-0.528192	0.147577	-3.57909	0.000344794	0.00285322	7219.94	6978.53	5794.13	6538.19	5348.23	4373.27	3977.83	4927.2
1811	Rhbdf1	272.452	1.26297	0.352956	3.57827	0.00034587	0.00286054	315.381	85.3051	170.25	134.711	190.107	480.243	333.407	470.212
1812	BC094916	212.074	0.985323	0.27538	3.57805	0.000346169	0.00286144	110.377	126.23	182.115	204.296	156.077	327.864	350.517	239.113
1813	Cox6b1	2506.49	0.58627	0.16391	3.57678	0.000347849	0.00287373	1943.51	2239.83	1801.92	2342.49	2211.54	3354.05	2513.38	3645.17
1814	Rpl4	8912.17	0.558476	0.156148	3.57658	0.000348114	0.00287434	8587.37	7923.18	6437.78	8110.57	6782	11191.3	9292.83	12972.3
1815	1700015E13Rik	60.1483	-1.86767	0.52255	-3.57414	0.000351383	0.00289973	65.9932	100.507	133.372	45.1645	62.5722	18.9394	14.0161	40.6218
1816	Ndfip2	1298.63	-0.485677	0.135975	-3.5718	0.000354533	0.00292251	1461.2	1304.87	1426.99	1628.14	1454.92	1043.37	1052.51	1017.08
1817	Prkab1	3091.36	-0.77139	0.215964	-3.57185	0.000354471	0.00292251	5181.81	3377.19	2995.12	2833.16	3922.33	2697.27	1955.44	1768.59
1818	Serpinb6b	22.4489	2.27359	0.636752	3.5706	0.000356159	0.00293429	8.84989	7.19858	14.5777	6.67305	7.53327	27.4521	38.4525	68.8541
1819	Psmb9	783.715	0.660509	0.185096	3.56847	0.000359067	0.00295663	776.389	570.695	590.526	520.793	761.562	1075.49	981.678	992.583
1820	Arhgap39	2113.76	-0.563099	0.157814	-3.56811	0.000359564	0.0029591	2090.66	2593.9	2138.55	2600.57	2620.86	1763.8	1758.83	1342.86
1821	Rab3d	303.204	0.874776	0.24529	3.56629	0.000362067	0.00297806	227.008	310.845	204.522	171.751	244.057	484.639	439.773	343.04
1822	Abcd3	1597.13	-0.539384	0.151299	-3.56501	0.000363839	0.00299099	1961.91	1902.31	1793.65	1584.3	1788.4	1290.25	1049.34	1406.88
1823	Atp8a1	6033.22	0.411481	0.115543	3.56127	0.000369059	0.00303224	5386.81	5800.77	5124.69	4934.96	5597.58	7475.14	6925.07	7020.71
1824	Elavl4	169.582	0.981274	0.275631	3.5601	0.000370721	0.00304422	104.714	139.717	153.3	126.843	99.9228	264.143	288.5	179.52
1825	Zdhhc14	266.642	0.781049	0.219672	3.55552	0.000377225	0.00309594	167.775	209.052	248.305	193.603	225.203	350.017	322.853	416.332
1826	Zfp532	531.085	-0.73	0.205473	-3.55278	0.000381186	0.00312673	638.503	609.03	608.68	496.311	752.723	360.135	314.925	468.372
1827	AF529169	168.807	3.05191	0.859156	3.55222	0.000381996	0.00313166	11.5289	58.7122	102.513	47.5275	6.17257	497.353	294.629	332.022
1828	Cltb	681.587	0.688969	0.194087	3.5498	0.000385531	0.00315891	617.724	457.845	559.948	476.085	651.519	861.567	758.408	1069.6
1829	Lrpprc	1615.41	-0.628708	0.177144	-3.54914	0.000386496	0.00316508	1905.91	2053.25	1645.18	2015.55	1704.82	1150.7	1510.39	937.461
1830	Fam217b	612.027	-0.882897	0.248896	-3.54725	0.00038927	0.00318606	1009.72	490.16	569.008	868.423	752.416	350.566	401.592	454.337
1831	Gm12481	248.394	1.45138	0.409255	3.54639	0.000390542	0.00319472	239.423	136.069	130.005	101.126	141.872	368.031	152.495	718.133
1832	Zc3h14	578.488	-0.715758	0.201848	-3.54601	0.000391104	0.00319758	793.133	606.639	647.999	765.784	580.895	504.072	345.295	384.084
1833	Asah1	14035.6	0.408569	0.11526	3.54476	0.00039297	0.00321108	13774.4	13216	11541.5	12195.4	11782.7	16954.3	16644.5	16176.3
1834	Mt2	55.4193	1.94329	0.548398	3.54358	0.000394731	0.0032237	18.4095	30.7321	31.5983	30.0967	20.0983	77.9589	35.0212	199.439
1835	Arpc3	2042.28	0.654759	0.184919	3.54078	0.000398946	0.00325603	1524.32	1569.69	1628.62	2199.08	1472.92	2697.58	2108.47	3137.57
1836	Rdh11	619.263	-0.707877	0.199928	-3.54066	0.000399124	0.00325603	865.987	777.512	731.386	543.486	696.158	379.858	448.762	510.953
1837	Tpk1	119.399	1.99314	0.56304	3.53996	0.000400189	0.00326295	58.6671	28.5866	67.131	40.4153	77.8655	126.808	56.1231	499.599
1838	Suco	642.323	-0.717655	0.202761	-3.53942	0.000401009	0.00326785	754.185	870.314	832.687	619.104	682.654	354.156	532.916	492.565
1839	Mta3	548.406	0.876088	0.247641	3.53773	0.000403577	0.00328699	604.751	363.459	286.795	460.209	381.643	858.624	827.35	604.414
1840	Naip5	1670.48	-0.719343	0.203374	-3.53705	0.000404625	0.00329373	2359.03	1878.72	1552.61	2165.84	1847.01	1576.24	953.367	1031.07
1841	Dexi	72.8683	-1.30498	0.369009	-3.53643	0.000405572	0.00329965	94.1484	99.4982	100.747	93.7193	78.4466	26.6262	45.28	44.4805
1842	Marcks	9584.79	-0.635325	0.179666	-3.53614	0.000406024	0.00330154	9597.76	10066.2	11394.8	13436.7	10799.6	7430.41	5252.63	8700.22
1843	Hunk	17.1145	4.2588	1.20444	3.53593	0.000406347	0.00330237	2.66362	2.71116	0	0	5.50991	70.5212	55.5097	0
1844	Rxfp1	146.834	-1.58139	0.447267	-3.53568	0.000406731	0.0033037	209.882	108.773	308.543	124.403	222.836	27.5934	90.4807	82.1568
1845	Bcar3	80.8147	3.92089	1.11061	3.53039	0.000414945	0.00336859	23.9947	5.97801	4.15491	0	30.1573	274.158	180.895	127.18
1846	Zmiz1	4259.32	-0.530993	0.150418	-3.53013	0.000415359	0.00337013	5537.35	4812.72	4390.34	4567.72	4785.92	3966.17	3194.79	2819.55
1847	Cbx7	724.871	0.794483	0.225072	3.52991	0.000415702	0.00337108	574.834	710.122	540.573	514.104	477.012	853.471	750.322	1378.53
1848	Rps8	1931.53	0.651446	0.184681	3.52742	0.000419632	0.00340111	1294.76	1688.56	1495.14	2047.13	1420.66	2458.61	2096.45	2950.96
1849	Paqr4	339.628	0.973307	0.275978	3.52676	0.000420677	0.00340773	326.075	283.524	150.448	224.886	267.588	630.388	454.956	379.158
1850	Nynrin	121.553	1.44702	0.410334	3.52644	0.000421181	0.00340997	60.3529	119.017	33.418	97.7704	58.9945	265.185	167.808	169.88
1851	Aes	131.802	1.24653	0.353543	3.52582	0.000422178	0.0034162	122.119	65.824	49.2865	107.864	92.2892	261.69	165.937	189.408
1852	Mmab	321.578	0.720849	0.20449	3.5251	0.00042332	0.00342359	216.725	287.481	259.553	251.34	281.154	500.266	393.874	382.231
1853	Knstrn	68.6131	1.59286	0.452084	3.52338	0.000426082	0.00344407	42.5912	20.4914	67.3374	34.6347	33.2306	144.281	127.804	78.5347
1854	Cited2	142.867	1.40717	0.399406	3.52315	0.00042645	0.00344518	53.1882	72.279	102.416	155.382	55.0897	224.393	158.749	321.442
1855	Irf9	1703.83	0.697571	0.19802	3.52273	0.000427133	0.00344884	1760.21	1546.96	1306.97	1025.48	1263.3	2417.09	1787.55	2523.07
1856	Rnaseh2c	465.497	0.669927	0.190241	3.52146	0.000429173	0.00346344	402.387	442.726	362.329	380.11	314.106	622.721	520.794	678.805
1857	H2-Eb1	616.256	4.69845	1.33435	3.52116	0.000429669	0.00346558	19.8945	0	51.9525	81.044	144.336	1899.02	1272.26	1461.54
1858	Cdk6	3756.48	0.823369	0.233974	3.51906	0.000433084	0.00348937	2998.27	3406.08	3151.52	2812.13	2193.64	4024.05	3685.69	7780.44
1859	Itga6	2408.97	-0.565228	0.160613	-3.51919	0.000432861	0.00348937	2685.58	2703.93	2586	2801.05	2953.8	2256.49	1859.54	1425.34
1860	I830012O16Rik	188.306	1.59517	0.453478	3.51763	0.000435414	0.00350625	111.7	128.251	130.716	50.1164	118.205	599.873	265.633	101.956
1861	Nup88	2670.66	-0.474512	0.134901	-3.51748	0.000435661	0.00350636	3213.24	3029.81	2759.69	2831.94	3103.22	2118.48	2418.57	1890.34
1862	Cox5b	1166.1	0.598489	0.170234	3.51569	0.000438609	0.00352819	900.847	989.82	847.044	1197.84	941.801	1330.35	1384.12	1736.94
1863	S1pr1	1801.77	0.496006	0.141135	3.51442	0.000440722	0.00354329	1573.85	1320.58	1646.04	1689.67	1571.05	2198.23	2020.38	2394.4
1864	Mcur1	1239.46	-0.581733	0.16555	-3.51394	0.000441508	0.0035477	1364.41	1404.12	1407.44	1681.81	1214.15	1026.1	796.888	1020.8
1865	Pdzd8	433.032	-0.690918	0.196652	-3.5134	0.000442409	0.00355303	478.549	484.008	513.773	618.464	424.364	308.793	284.115	352.187
1866	Acvr2a	584.927	-0.669069	0.190451	-3.51308	0.00044294	0.00355539	700.852	518.292	726.585	769.592	685.381	390.879	480.142	407.696
1867	Scamp1	2447.1	-0.546594	0.155605	-3.5127	0.000443574	0.00355857	3136.66	2921.15	2581.31	2345.9	2892.39	2177.48	1637.23	1884.66
1868	Pde4d	242.557	0.936196	0.26665	3.51096	0.000446491	0.00357814	198.569	221.981	187.057	175.803	119.179	267.461	403.683	366.722
1869	Ubc	45510.5	-0.556896	0.158614	-3.51101	0.000446407	0.00357814	62225.5	56396.4	50190.3	42740.5	47044.8	35938.6	29866.8	39680.9
1870	Ifi205	47.2833	2.64975	0.755176	3.50878	0.00045016	0.00360561	10.9086	15.4166	44.3259	2.97117	7.42319	187.694	79.9663	29.5613
1871	Bcl3	62.0251	2.96778	0.846194	3.50721	0.000452827	0.00362503	1.7428	10.6276	65.1977	8.59301	2.43753	88.1186	105.617	213.866
1872	Fkbp5	1878.37	-1.04645	0.298407	-3.50678	0.000453563	0.00362899	3207.28	2765.74	2111.18	2083.23	1462.01	868.639	682.734	1846.17
1873	Phlpp2	276.523	-0.796836	0.227244	-3.50653	0.000453993	0.00363049	360.292	311.566	310.682	387.546	280.536	226.72	180.893	153.951
1874	Brms1l	331.176	-0.677098	0.193202	-3.50462	0.000457263	0.00365469	391.305	450.261	354.068	372.765	356.931	249.649	229.476	244.95
1875	Ccdc97	1544.54	-0.561469	0.160407	-3.50029	0.00046476	0.00371263	2070.52	1827.48	1505.48	1571.1	1807.13	1295.1	1047.56	1231.91
1876	Hint1	1178.27	0.671603	0.19196	3.49866	0.000467598	0.00373331	887.836	1010.58	764.319	1287.96	864.432	1529.83	1357.22	1723.95
1877	Pknox1	1568.01	-0.600824	0.17188	-3.4956	0.000473006	0.00377447	2204.41	1764.22	1670.3	1618.08	1745.48	1419.12	1145.67	976.788
1878	Mtmr14	1130.81	0.501761	0.143563	3.49507	0.000473937	0.00377989	1093.29	923.029	964.585	929.043	982.743	1524.53	1252.37	1376.86
1879	Sp4	297.883	-0.873785	0.250036	-3.49464	0.000474708	0.00378402	285.247	414.569	385.373	443.548	271.955	191.364	227.004	164.008
1880	Lypd6	132.311	-1.97759	0.566086	-3.49345	0.000476819	0.00379883	106.373	124.552	100.952	290.618	293.005	27.2861	104.081	11.6217
1881	Xrcc5	397.367	-0.853516	0.244398	-3.49231	0.000478855	0.00381302	602.889	551.308	455.528	379.845	402.667	341.814	219.818	225.069
1882	Nlrc5	55.3145	1.89982	0.544415	3.48966	0.000483644	0.0038491	28.9666	13.1174	60.0038	20.2161	15.6148	118.34	115.853	70.4035
1883	Haao	60.8417	-2.43403	0.697531	-3.4895	0.000483925	0.0038493	133.186	44.3251	52.3036	69.1413	143.826	37.4842	6.46776	0
1884	Rsl1	420.701	-0.710084	0.203792	-3.48436	0.00049332	0.00392195	417.916	555.093	448.005	516.708	522.188	244.555	349.08	312.062
1885	Tns1	1661.25	-0.74147	0.212811	-3.48418	0.000493649	0.00392248	2575.04	2242.17	1380.63	1681.99	1901.49	1373.36	978.079	1157.22
1886	Ganc	956.808	-0.601264	0.1726	-3.48356	0.000494792	0.00392948	1085.32	1374.59	1110.41	911.528	1006.45	730.808	744.829	690.536
1887	Gm10175	1593.24	0.571872	0.16425	3.48171	0.000498223	0.00395463	1359.2	1512.04	1229.98	1462.18	1171.21	2278.4	1634.75	2098.14
1888	Gbp8	20.0565	4.17495	1.19978	3.47977	0.000501852	0.00398132	7.85427	0	0	7.29354	0	47.8093	75.9139	21.581
1889	Hmgb2	500.035	0.629092	0.180831	3.4789	0.00050348	0.00399213	452.539	454.6	383.143	410.713	384.021	691.448	706.168	517.645
1890	Gm10925	1827.61	2.6328	0.756936	3.47823	0.000504739	0.00399999	1415.21	478.239	311.515	255.689	636.804	5977.2	1184.06	4362.2
1891	Pigh	838.954	-0.611295	0.175766	-3.4779	0.000505363	0.00400281	1085.71	1063.14	937.307	861.405	872.944	739.647	532.934	618.549
1892	Ercc6l	152.368	1.07355	0.308873	3.4757	0.000509521	0.00403362	101.294	122.641	123.506	91.521	99.2648	143.693	309.181	227.841
1893	Ccdc117	958.966	-0.807944	0.232625	-3.47315	0.000514384	0.00406997	779.113	1332.33	1315.74	1432.09	856.362	572.458	767.989	615.641
1894	Mfn2	1149.96	0.555368	0.159911	3.47299	0.0005147	0.00407032	1004.11	1046.53	1014.48	760.938	1055.92	1391.89	1374.2	1551.65
1895	Myom1	202.265	1.15085	0.331701	3.46956	0.000521315	0.00412045	221.264	134.03	129.289	74.5901	132.92	230.48	315.559	379.987
1896	Prox2	175.858	-1.05531	0.304394	-3.46693	0.000526444	0.0041588	223.669	196.625	203.403	252.438	226.192	91.8022	153.791	58.9458
1897	Pkig	1478.78	-0.647056	0.186669	-3.46633	0.000527607	0.00416579	1745.52	1808.73	1456.41	1947.86	1583.63	1213.83	795.095	1279.18
1898	Cox8a	2488.13	0.531545	0.153366	3.46586	0.000528548	0.00416882	2072.24	2351.36	1830.24	2485.77	1915.4	3203.41	2735.67	3310.95
1899	Ylpm1	1155.48	-0.572622	0.165215	-3.46591	0.000528437	0.00416882	1101.06	1324.46	1318.43	1443.48	1412.49	1035.99	855.793	752.119
1900	Gtf2i	2004.69	-0.498621	0.143994	-3.4628	0.000534595	0.0042143	2316.56	1973.19	2274.86	2463.32	2238.73	1828.6	1490.64	1451.66
1901	Ext1	222.32	0.941863	0.272057	3.462	0.000536174	0.00422408	134.786	205.185	167.834	202.836	111.625	318.789	274.088	363.413
1902	Mif4gd	618.037	0.770012	0.222426	3.46189	0.0005364	0.00422408	456.571	514.279	480.804	492.47	482.496	662.048	643.173	1212.46
1903	Pla2g4a	1452.44	-0.78338	0.226541	-3.45801	0.00054419	0.00428317	1948.45	1593.79	1598.51	1278.98	2204.68	1034.37	1281.44	679.302
1904	Hist1h2be	553.704	-0.647993	0.187455	-3.45679	0.000546648	0.004298	539.242	580.214	666.446	663.389	761.802	418.579	450.421	349.542
1905	Mctp1	576.041	-0.633113	0.183145	-3.4569	0.00054643	0.004298	629.887	775.092	583.101	579.885	758.494	434.394	455.744	391.729
1906	Myo10	87.5398	2.01672	0.583439	3.4566	0.000547042	0.00429884	77.7862	29.269	10.2657	18.6182	67.8697	107.391	179.34	209.779
1907	Ogt	7299.53	0.456524	0.132175	3.45393	0.000552481	0.00433931	6654.45	6669.93	5836.95	6905.55	5963.84	9961.22	7837.8	8566.47
1908	Rpl37rt	404.221	2.25051	0.651608	3.45378	0.00055278	0.00433938	214.754	174.083	113.556	217.586	117.12	868.923	150.628	1377.12
1909	Olfr110	97.2375	-1.34006	0.388048	-3.45332	0.000553725	0.00434452	152.783	103.309	158.463	139.734	75.797	36.1695	64.9351	46.7092
1910	Etv3	2059.85	0.567326	0.164446	3.44993	0.00056073	0.00439718	2065.7	1736.89	1591.64	1588.29	1728.9	2630.35	2089.2	3047.81
1911	F3	28.1206	-3.04025	0.881498	-3.44896	0.000562751	0.00440962	56.7397	26.9747	33.9005	42.8186	51.6607	0	12.8704	0
1912	Gm2956	285.267	-0.998889	0.289627	-3.44889	0.000562905	0.00440962	308.476	450.534	277.3	407.067	321.322	252.189	155.528	109.716
1913	Rftn2	44.3042	2.25996	0.655413	3.44814	0.000564456	0.00441945	20.2116	3.7134	28.9135	26.854	13.7012	48.3725	152.787	59.8801
1914	Szrd1	1258.27	0.903612	0.262069	3.448	0.000564756	0.0044195	1161.38	1023.02	859.669	833.599	839.556	1341.77	1149.07	2858.12
1915	Dctn1	1703.29	0.747679	0.216887	3.44732	0.000566182	0.00442834	2005.84	1041.17	1262.15	1274.97	1211.45	2770.89	2071.86	1988.01
1916	Mthfd2	257.049	-1.03355	0.299891	-3.44642	0.000568069	0.00444078	474.786	305.946	277.055	330.566	207.13	197.917	134.185	128.81
1917	Kcnk6	3249.42	-0.78197	0.226942	-3.44568	0.000569617	0.00444824	5481.09	4056.31	3630.03	3340.83	2750.97	2253.61	1653.83	2828.73
1918	Leng9	254.648	0.94197	0.273369	3.44578	0.00056941	0.00444824	119.766	223.797	207.025	193.989	196.183	409.352	257.063	430.011
1919	Tmed1	473.524	0.975293	0.283196	3.44388	0.000573433	0.00447571	461.857	406.403	265.721	329.802	281.416	1021.08	566.351	455.566
1920	Mvb12b	744.628	-0.953682	0.276988	-3.44304	0.000575209	0.00448723	935.392	593.947	899.949	1235.39	891.254	670.994	449.065	281.038
1921	Rpl22l1	657.791	0.761948	0.221464	3.4405	0.00058063	0.00452716	384.883	536.901	426.574	745.195	512.27	874.462	842.022	940.022
1922	B3gnt1	1273.54	-0.581923	0.169157	-3.44014	0.00058141	0.00453088	1351.12	1533.52	1421.89	1562.31	1403.84	1180.59	766.003	969.083
1923	Dock2	6999.54	-0.484523	0.14094	-3.4378	0.000586462	0.00456788	9157.31	7898.27	7207.96	6774.15	8161.73	6186.51	5422.98	5187.37
1924	Fam49b	2334.41	-1.54189	0.448681	-3.43649	0.000589299	0.00458759	1818.86	2271.8	3213.28	4749.01	3420.47	676.698	819.369	1705.82
1925	Aifm1	442.021	-0.685016	0.199383	-3.43568	0.000591074	0.00459901	501.668	500.789	571.707	428.584	574.427	277.216	380.422	301.352
1926	Btg2	3988.23	-0.519987	0.151407	-3.43436	0.000593953	0.00461902	5340.6	4805.26	4064.04	3647.02	4642.22	3245.27	3171.14	2990.29
1927	P2ry14	16.4213	4.11885	1.20007	3.43217	0.000598763	0.00465401	0	0	7.25076	4.2149	0	30.8679	19.5966	69.4404
1928	Tsc22d2	173.141	-1.21943	0.355388	-3.43127	0.000600766	0.00466715	92.0166	235.426	272.4	278.009	221.867	101.378	83.6126	100.421
1929	Tcea2	485.467	-0.756228	0.220457	-3.43028	0.000602958	0.00468175	699.462	588.641	488.085	592.092	507.455	435.572	318.095	254.331
1930	Gm10123	3371.55	0.733759	0.213922	3.43004	0.000603498	0.00468352	3207.97	2978.68	2396.21	2677.54	2229.3	4213.36	3060.32	6209
1931	Eef2	8844.44	0.593458	0.173072	3.42897	0.00060587	0.00469706	8181.08	7441.12	6734.03	9356.53	5422.51	11222.1	10593.4	11804.8
1932	Trmt12	607.099	-0.716112	0.208839	-3.42902	0.000605763	0.00469706	831.473	778.841	604.561	562.517	790.678	511.425	434.254	343.044
1933	Gpd2	192.336	1.22176	0.356367	3.42837	0.000607209	0.004705	106.276	235.213	81.8255	113.256	103.223	234.556	274.875	389.462
1934	Maf	5984.43	0.528121	0.154092	3.4273	0.000609605	0.00471869	4781.82	5472.49	4681.64	5141.92	5575.74	7769.58	5813.46	8638.74
1935	Pde4dip	2124.82	-0.520472	0.151859	-3.42734	0.000609522	0.00471869	2890.44	2572.72	2202.08	2065.31	2255	1739.59	1591.23	1682.18
1936	Mettl18	175.476	-0.966428	0.282163	-3.42508	0.000614628	0.00475511	240.05	188.262	255.661	193.499	194.338	77.2593	133.817	120.924
1937	Kctd21	911.166	-0.787579	0.229995	-3.42432	0.000616331	0.00476582	1061.15	1052.92	1318.16	890.435	1104.91	714.226	779.059	368.475
1938	Sh3bp4	196.923	2.72842	0.797565	3.42094	0.000624052	0.00482304	75.7108	20.2465	85.7586	8.43712	127.323	415.867	409.964	432.074
1939	Gmnn	109.629	1.19829	0.350364	3.42013	0.000625912	0.00483492	93.8145	67.3293	86.184	40.7227	81.0572	207.017	128.718	172.188
1940	Laptm5	85179.4	-0.407448	0.119172	-3.41898	0.000628563	0.00485095	99108.4	97882.3	92029.6	83085.5	97071.7	73391.5	64380.2	74485.8
1941	Plxnb2	17256.9	-0.573152	0.16764	-3.41895	0.000628634	0.00485095	24881.9	21254.3	18624.1	16820.2	16810.3	15354.8	12657.2	11652.3
1942	Brwd1	703.986	-0.581291	0.170166	-3.41602	0.000635447	0.00490039	768.671	764.397	806.78	979.537	702.128	508.452	574.977	526.946
1943	Mapk14	2159.67	-0.596271	0.174557	-3.41591	0.000635697	0.00490039	3171.08	2347.75	2379.29	2389.38	2095.94	1779.4	1783.78	1330.77
1944	Prkcq	632.814	-0.848484	0.24849	-3.41457	0.000638838	0.00492208	763.986	749.244	902.166	477.688	903.578	313.464	531.924	420.46
1945	Zmym2	913.341	-0.612199	0.179356	-3.41332	0.000641767	0.0049421	846.592	1220.75	1153.97	1133.91	892.81	646.858	742.582	669.258
1946	Hmga2	243.486	-0.751176	0.220101	-3.41287	0.000642825	0.0049477	299.533	276.762	263.05	280.526	323.354	165.927	198.813	139.92
1947	Dhrs1	1111.87	0.539362	0.158059	3.41241	0.00064392	0.00495359	963.229	1002.35	949.454	892.675	944.815	1641.4	1146.73	1354.35
1948	Synj1	1969.48	0.606054	0.17763	3.4119	0.000645119	0.0049563	1644.62	1956.85	1452.41	1923.59	1253.2	2340.06	2392.19	2792.88
1949	Tbl1xr1	1446.97	-0.481456	0.141113	-3.41186	0.000645222	0.0049563	1535.68	1684.64	1619	1779.76	1491.25	1204.06	1247.31	1014.06
1950	Ubxn1	603.343	0.628024	0.184072	3.41184	0.000645266	0.0049563	471.605	403.041	610.689	548.18	471.996	810.682	738.934	771.614
1951	D6Wsu163e	1054.07	-0.581039	0.170359	-3.41068	0.000648006	0.00497322	1232.32	1393.26	1089.06	1035.77	1261.96	886.516	673.289	860.383
1952	Wasf2	5952.85	-0.491818	0.144202	-3.41063	0.000648132	0.00497322	6828.42	7770.78	6112.99	6201.98	6474.55	5528.48	4334.08	4371.55
1953	Alx4	159.844	-1.01225	0.296997	-3.4083	0.0006537	0.00501337	137.186	204.808	210.787	240.94	198.496	96.0932	121.877	68.5655
1954	Med14	638.853	0.700721	0.205692	3.40665	0.000657654	0.00504111	458.516	457.655	490.382	661.459	501.486	770.279	699.782	1071.26
1955	Sc5d	490.736	-0.625519	0.183665	-3.40575	0.000659822	0.00505514	574.156	670.571	543.893	562.472	470.618	348.487	357.727	397.961
1956	Vav1	10304	-0.548608	0.161131	-3.40473	0.000662291	0.00507147	15014.6	11447.5	11323.8	9575.61	11086.9	8333	7066.49	8584.21
1957	Igsf9	165.678	1.43193	0.420592	3.40456	0.0006627	0.00507201	90.1209	180.664	57.1272	131.223	48.7594	375.201	205.593	236.735
1958	Gm21742	29.1368	2.18041	0.640647	3.40345	0.00066541	0.00509015	19.7334	5.48996	12.7772	5.18355	20.0595	41.4632	78.2891	50.0982
1959	Hk2	4180.95	-0.505825	0.148646	-3.40288	0.000666802	0.00509819	4263.65	4477.45	4661.51	4294.92	5808.69	3479.61	2970.14	3491.65
1960	Srsf9	699.814	-0.686726	0.201884	-3.40158	0.00066997	0.0051198	732.182	779.84	833.592	1056.75	664.697	463.485	453.688	614.282
1961	Scamp4	1593.73	0.585626	0.172189	3.40108	0.000671212	0.00512668	1635.26	1359.95	1156.46	1240.4	1309.97	2116.03	1626.25	2305.52
1962	Mospd3	198.492	0.856988	0.251986	3.40093	0.000671571	0.0051268	124.331	151.544	137.018	151.175	196.205	319.005	231.199	277.458
1963	Aldh16a1	491.835	0.905732	0.266477	3.39891	0.000676544	0.00516214	519.121	328.039	338.224	257.769	412.267	936.227	506.521	636.51
1964	Fcrls	70228.4	-0.495982	0.145943	-3.39847	0.000677644	0.00516527	88620.4	82016.1	75468.5	67610.9	80409.8	58045.3	46259.1	63396.8
1965	Spice1	294.692	0.845262	0.248718	3.39848	0.000677619	0.00516527	191.774	167.787	300.294	229.853	245.992	478.337	343.423	400.076
1966	Fam181b	61.2313	1.58632	0.466941	3.39727	0.000680621	0.00518532	46.5419	42.9314	13.3213	46.1064	27.8488	116.433	118.238	78.4303
1967	Layn	184.345	-1.08113	0.318317	-3.39638	0.000682847	0.00519963	217.974	170.689	184.172	231.904	341.713	77.4945	129.734	121.079
1968	Vangl1	311.258	-1.25302	0.369068	-3.39508	0.000686079	0.00522159	546.881	153.376	404.842	348.091	517.935	134.677	146.457	237.806
1969	Cox6c	1043.3	0.658194	0.19391	3.39434	0.000687951	0.00523318	624.64	880.425	847.428	943.077	986.8	1536.2	1078.55	1449.27
1970	Zdhhc20	1815.14	-0.518224	0.152777	-3.39202	0.000693799	0.00527499	2093.79	2048.04	2180.96	2001.71	1888.72	1386.63	1190.92	1730.37
1971	Ehbp1l1	1138.81	0.589249	0.173793	3.39052	0.000697611	0.00530128	824.017	1085.41	925.475	1090.52	872.361	1664.94	1469.82	1177.98
1972	Incenp	184.583	1.59221	0.469704	3.38981	0.000699402	0.00531219	66.5849	138.453	200.094	78.8083	44.2801	454.436	359.068	134.942
1973	Mppe1	369.567	0.63874	0.188478	3.38893	0.000701654	0.0053239	302.09	282.455	317.579	298.942	319.511	477.081	398.486	560.394
1974	Znrf2	768.634	-0.771501	0.227649	-3.389	0.000701489	0.0053239	782.909	1004.02	842.952	1239.68	679.224	630.783	421.258	548.247
1975	Scp2	1945.05	0.516424	0.152443	3.38766	0.000704914	0.00534592	1677.57	1978.56	1434.27	1666.05	1609.43	2462.2	2102.55	2629.78
1976	Arl8b	4410.68	-0.459154	0.135569	-3.38686	0.000706987	0.00535894	4567.76	4671.43	4908.67	5493.82	4902.41	3264.75	3336.3	4140.33
1977	Cdkn1a	1243.18	0.994444	0.293667	3.3863	0.000708421	0.00536437	986.628	1048.69	783.083	480.704	1221.26	1485.27	1231.22	2708.58
1978	Gm15501	172.214	1.36656	0.40355	3.38635	0.000708279	0.00536437	172.51	87.6618	136.631	57.844	83.0726	232.933	161.837	445.226
1979	2310067B10Rik	784.683	0.730788	0.215883	3.38511	0.000711489	0.00538488	620.944	614.178	666.674	584.274	669.449	1471.35	906.545	744.052
1980	Gm3002	143.698	-1.33841	0.395446	-3.38455	0.000712952	0.0053905	120.997	216.3	194.027	260.683	144.254	118.925	59.1331	35.2658
1981	Lonrf3	242.583	-0.931906	0.275332	-3.38466	0.000712666	0.0053905	326.9	237.825	267.443	250.876	386.187	110.789	161.444	199.196
1982	Dip2c	264.404	0.937411	0.277022	3.38389	0.000714675	0.00540081	264.397	121.032	234.436	210.767	157.655	398.45	376.899	351.598
1983	Tmem206	3869.43	-0.419586	0.124081	-3.38156	0.000720759	0.00544404	4751.97	4268.67	3945.71	3908.58	4492.08	3228.45	3097.58	3262.41
1984	Tubb6	494.887	1.0066	0.297696	3.38129	0.000721472	0.00544668	362.82	458.814	313.386	269.113	379.043	501.064	488.216	1186.64
1985	Laptm4a	8569.23	0.519641	0.153749	3.3798	0.000725385	0.00547346	7981.03	7295.74	6748.12	7496.05	7318.43	10822.7	8221	12670.8
1986	Olfr1268-ps1	41.5066	1.69737	0.502293	3.37925	0.000726847	0.00548173	19.9621	28.2453	33.2538	20.9953	9.86871	76.1321	64.6616	78.9342
1987	Phc2	839.03	-0.631557	0.18693	-3.37858	0.000728625	0.00549237	1069.07	1044.37	978.09	973.037	784.383	772.405	554.912	535.971
1988	Slfn1	16.1671	3.82395	1.1319	3.37836	0.000729195	0.0054939	1.33469	9.8228	0	2.01462	0	38.0813	54.5179	23.5656
1989	Ccl4	599.194	2.60934	0.772472	3.37791	0.000730398	0.0055002	43.4736	320.757	309.157	250.72	102.865	1184.95	413.44	2168.19
1990	Cdk7	412.714	-0.82767	0.245226	-3.37513	0.0007378	0.00555315	696.779	430.952	479.592	394.948	476.581	306.239	316.673	199.951
1991	Lima1	661.294	0.626207	0.185579	3.37434	0.000739926	0.00556635	414.2	586.729	641.735	526.936	577.471	942.156	797.673	803.45
1992	Smarcd1	268.973	-0.776323	0.230107	-3.37374	0.000741541	0.00557571	308.969	356.166	232.453	351.09	341.255	172.985	186.37	202.495
1993	Pcdhga4	188.866	-1.09222	0.323773	-3.3734	0.000742473	0.00557991	333.541	267.22	191.288	186.878	200.781	149.529	72.76	108.929
1994	Col11a2	11.3634	-3.94383	1.16937	-3.37261	0.000744606	0.00559313	12.6972	19.2686	9.63619	19.7573	26.7404	0	2.80778	0
1995	Oard1	671.442	-0.613938	0.182074	-3.37192	0.000746466	0.0056043	845.491	680.749	784.999	643.462	904.217	554.904	454.911	502.798
1996	Nuak2	1000.48	0.590784	0.175225	3.37158	0.000747373	0.0056083	947.669	921.618	751.783	868.419	705.505	1086.45	1216.95	1505.45
1997	Gpcpd1	1492.58	0.663801	0.19694	3.37058	0.000750104	0.00562597	1321.45	1260.6	945.838	1046.58	1532.79	1906.93	1581.98	2344.48
1998	Dcakd	1135.9	-0.549385	0.163007	-3.37033	0.000750791	0.0056283	1297.65	1463.65	1150.7	1157.37	1380.35	1025.38	798.883	813.184
1999	Sh3tc1	1430.58	-0.752975	0.223474	-3.36941	0.000753285	0.00564417	1951.64	2207.72	1405.05	1442.29	1447.85	1259.21	1037.75	693.166
[truncated: 27,959 more rows]
